# Supplementary material
Source: PubMed Central journal article supplement (PMC3165061)
Supplement: NIHMS317356-supplement-1_si_001.pdf [file NIHMS317356-supplement-1_si_001.pdf]

**Comparison of  $\beta$ -Sheets of Capped Polyalanine with those of the Tau-Amyloid structure  
VQIVYK A Density Functional Theory (DFT) Study**

Joshua A. Plumley and J. J. Dannenberg\*

Department of Chemistry

City University of New York - Hunter College and the Graduate School

695 Park Avenue, New York NY 10065

[jdannenberg@gc.cuny.edu](mailto:jdannenberg@gc.cuny.edu)

Supplementary Information

Complete Gaussian 09 reference (ref. 17)

S2

Cartesian Coordinates for all structures

S3-S457

Completer reference for GAUSSIAN 09 (ref. 17)

Frisch, M. J.; Trucks, G. W.; Schlegel, H. B.; Scuseria, G. E.; Robb, M. A.; Cheeseman, J. R.; Scalmani, G.; Barone, V.; Mennucci, B.; Petersson, G. A.; Nakatsuji, H.; Caricato, M.; Li, X.; Hratchian, H. P.; Izmaylov, A. F.; Bloino, J.; Zheng, G.; Sonnenberg, J. L.; Hada, M.; Ehara, M.; Toyota, K.; Fukuda, R.; Hasegawa, J.; Ishida, M.; Nakajima, T.; Honda, Y.; Kitao, O.; Nakai, H.; Vreven, T.; J. A. Montgomery, J.; Peralta, J. E.; Ogliaro, F.; Bearpark, M.; Heyd, J. J.; Brothers, E.; Kudin, K. N.; Staroverov, V. N.; Kobayashi, R.; Normand, J.; Raghavachari, K.; Rendell, A.; Burant, J. C.; Iyengar, S. S.; Tomasi, J.; Cossi, M.; Rega, N.; Millam, J. M.; Klene, M.; Knox, J. E.; Cross, J. B.; Bakken, V.; Adamo, C.; Jaramillo, J.; Gomperts, R.; Stratmann, R. E.; Yazyev, O.; Austin, A. J.; Cammi, R.; Pomelli, C.; Ochterski, J. W.; Martin, R. L.; Morokuma, K.; Zakrzewski, V. G.; Voth, G. A.; Salvador, P.; Dannenberg, J. J.; Dapprich, S.; Daniels, A. D.; Farkas, O.; Foresman, J. B.; Ortiz, J. V.; Cioslowski, J.; Fox, D. J. Gaussian 09, Revision A.2.; Gaussian, Inc.: Wallingford CT,, 2009.

Cartesian Coordinates:  
(Ac-AAAAAA-NHMe)<sub>1</sub>

|    |   |   |            |           |           |
|----|---|---|------------|-----------|-----------|
| 1  | 6 | 0 | 11.389514  | -0.222521 | -0.264498 |
| 2  | 8 | 0 | 11.557523  | -1.306942 | -0.826821 |
| 3  | 7 | 0 | 10.161656  | 0.227839  | 0.120962  |
| 4  | 1 | 0 | 10.030675  | 1.110427  | 0.604697  |
| 5  | 6 | 0 | 8.932825   | -0.531823 | -0.099643 |
| 6  | 1 | 0 | 8.884538   | -0.826665 | -1.158967 |
| 7  | 6 | 0 | 0.522989   | 0.373479  | 0.234669  |
| 8  | 8 | 0 | 0.725070   | 1.447396  | 0.811233  |
| 9  | 6 | 0 | 8.807325   | -1.787658 | 0.730105  |
| 10 | 1 | 0 | 7.893791   | -2.355148 | 0.428317  |
| 11 | 1 | 0 | 8.739515   | -1.555316 | 1.820171  |
| 12 | 1 | 0 | 9.699459   | -2.443023 | 0.561193  |
| 13 | 7 | 0 | -0.700681  | -0.056360 | -0.145376 |
| 14 | 1 | 0 | -0.845754  | -0.942941 | -0.624383 |
| 15 | 6 | 0 | -1.935100  | 0.679289  | 0.136011  |
| 16 | 1 | 0 | -1.961846  | 0.932156  | 1.206604  |
| 17 | 6 | 0 | -3.093889  | -0.301811 | -0.187167 |
| 18 | 8 | 0 | -2.880505  | -1.374809 | -0.760852 |
| 19 | 6 | 0 | -2.095992  | 1.958944  | -0.647358 |
| 20 | 1 | 0 | -3.004207  | 2.508156  | -0.298642 |
| 21 | 1 | 0 | -2.196305  | 1.761661  | -1.741963 |
| 22 | 1 | 0 | -1.205321  | 2.618178  | -0.485684 |
| 23 | 7 | 0 | -4.320801  | 0.111371  | 0.201332  |
| 24 | 1 | 0 | -4.474486  | 0.997365  | 0.678406  |
| 25 | 6 | 0 | -5.545596  | -0.645435 | -0.066242 |
| 26 | 1 | 0 | -5.576087  | -0.905204 | -1.135068 |
| 27 | 6 | 0 | -6.717186  | 0.318581  | 0.259294  |
| 28 | 8 | 0 | -6.519021  | 1.397924  | 0.826473  |
| 29 | 6 | 0 | -5.680654  | -1.922730 | 0.725769  |
| 30 | 1 | 0 | -6.583537  | -2.487466 | 0.388058  |
| 31 | 1 | 0 | -5.774371  | -1.720830 | 1.820104  |
| 32 | 1 | 0 | -4.781695  | -2.569596 | 0.559903  |
| 33 | 7 | 0 | -7.940874  | -0.115350 | -0.118740 |
| 34 | 1 | 0 | -8.085438  | -1.003605 | -0.594307 |
| 35 | 6 | 0 | -9.171451  | 0.628841  | 0.152811  |
| 36 | 1 | 0 | -9.186852  | 0.908498  | 1.217158  |
| 37 | 6 | 0 | -10.336505 | -0.353642 | -0.140958 |
| 38 | 8 | 0 | -10.136950 | -1.421715 | -0.721458 |
| 39 | 6 | 0 | -9.334410  | 1.888978  | -0.662262 |
| 40 | 1 | 0 | -10.241498 | 2.446878  | -0.325523 |

|    |   |   |            |           |           |
|----|---|---|------------|-----------|-----------|
| 41 | 1 | 0 | -9.438218  | 1.663799  | -1.751254 |
| 42 | 1 | 0 | -8.443416  | 2.552211  | -0.520232 |
| 43 | 7 | 0 | -11.557588 | 0.059386  | 0.292065  |
| 44 | 1 | 0 | -11.621410 | 0.951480  | 0.765475  |
| 45 | 6 | 0 | 7.761428   | 0.432775  | 0.218225  |
| 46 | 8 | 0 | 7.948787   | 1.508942  | 0.795462  |
| 47 | 7 | 0 | 6.540707   | -0.000685 | -0.175375 |
| 48 | 1 | 0 | 6.406053   | -0.885211 | -0.659797 |
| 49 | 6 | 0 | 5.303739   | 0.733646  | 0.093361  |
| 50 | 1 | 0 | 5.270751   | 0.994597  | 1.161927  |
| 51 | 6 | 0 | 4.145466   | -0.247267 | -0.229695 |
| 52 | 8 | 0 | 4.355313   | -1.317475 | -0.809811 |
| 53 | 6 | 0 | 5.144636   | 2.008596  | -0.698883 |
| 54 | 1 | 0 | 4.232378   | 2.557170  | -0.360085 |
| 55 | 1 | 0 | 5.052962   | 1.804317  | -1.792931 |
| 56 | 1 | 0 | 6.032649   | 2.670708  | -0.534703 |
| 57 | 7 | 0 | 2.919589   | 0.164171  | 0.165865  |
| 58 | 1 | 0 | 2.767983   | 1.047076  | 0.649217  |
| 59 | 6 | 0 | 1.693161   | -0.589071 | -0.102522 |
| 60 | 1 | 0 | 1.658198   | -0.841360 | -1.173029 |
| 61 | 6 | 0 | 1.559756   | -1.872116 | 0.680641  |
| 62 | 1 | 0 | 0.655577   | -2.433885 | 0.341582  |
| 63 | 1 | 0 | 1.469362   | -1.677869 | 1.776629  |
| 64 | 1 | 0 | 2.457995   | -2.518060 | 0.507541  |
| 65 | 6 | 0 | 12.552401  | 0.716170  | 0.038813  |
| 66 | 1 | 0 | 13.265964  | 0.191176  | 0.681999  |
| 67 | 1 | 0 | 13.065087  | 0.949965  | -0.899615 |
| 68 | 1 | 0 | 12.247515  | 1.648478  | 0.525045  |
| 69 | 6 | 0 | -12.780351 | -0.703020 | 0.069487  |
| 70 | 1 | 0 | -13.486272 | -0.141873 | -0.554360 |
| 71 | 1 | 0 | -12.508699 | -1.627091 | -0.443754 |
| 72 | 1 | 0 | -13.263459 | -0.951544 | 1.021606  |

P Pl (Ac-AAAAAA-NHMe)<sub>2</sub>

|    |   |   |            |           |           |
|----|---|---|------------|-----------|-----------|
| 1  | 6 | 0 | -10.725518 | -2.435771 | 2.079073  |
| 2  | 6 | 0 | -9.611019  | -2.832880 | 1.123727  |
| 3  | 8 | 0 | -8.871951  | -3.803955 | 1.344744  |
| 4  | 1 | 0 | -10.025787 | -1.190901 | -0.074020 |
| 5  | 7 | 0 | -9.497230  | -2.062128 | 0.006653  |
| 6  | 6 | 0 | -8.464951  | -2.364817 | -1.002289 |
| 7  | 6 | 0 | -7.123805  | -1.714865 | -0.571968 |
| 8  | 8 | 0 | -6.770527  | -0.600965 | -0.989994 |
| 9  | 1 | 0 | -11.471300 | -3.238082 | 2.092519  |
| 10 | 1 | 0 | -10.311757 | -2.354213 | 3.088875  |
| 11 | 1 | 0 | -11.208252 | -1.496326 | 1.795263  |
| 12 | 1 | 0 | -8.344156  | -3.456022 | -1.009077 |
| 13 | 1 | 0 | -6.864050  | -3.282146 | 0.700215  |
| 14 | 7 | 0 | -6.415017  | -2.451636 | 0.316924  |
| 15 | 6 | 0 | -5.176806  | -1.950622 | 0.937102  |
| 16 | 6 | 0 | -3.960443  | -2.735307 | 0.377516  |
| 17 | 8 | 0 | -3.856173  | -3.954111 | 0.520288  |
| 18 | 1 | 0 | -5.098902  | -0.891639 | 0.667455  |
| 19 | 1 | 0 | -3.211424  | -0.958852 | -0.378058 |
| 20 | 7 | 0 | -3.035159  | -1.955038 | -0.254128 |
| 21 | 6 | 0 | -1.804591  | -2.531939 | -0.795929 |
| 22 | 6 | 0 | -0.577250  | -1.953267 | -0.049277 |
| 23 | 8 | 0 | -0.519512  | -0.750847 | 0.248395  |
| 24 | 1 | 0 | -1.880146  | -3.612911 | -0.622312 |
| 25 | 1 | 0 | 0.342055   | -3.796865 | -0.088244 |
| 26 | 7 | 0 | 0.416742   | -2.831360 | 0.212858  |
| 27 | 6 | 0 | 1.692957   | -2.435750 | 0.823146  |
| 28 | 6 | 0 | 2.838551   | -3.080344 | 0.007200  |
| 29 | 8 | 0 | 2.706649   | -4.186649 | -0.522698 |
| 30 | 1 | 0 | 1.758692   | -1.344121 | 0.776194  |
| 31 | 1 | 0 | 3.978866   | -1.380022 | 0.299623  |
| 32 | 7 | 0 | 3.984189   | -2.350609 | -0.014352 |
| 33 | 6 | 0 | 5.199131   | -2.846845 | -0.664493 |
| 34 | 6 | 0 | 6.393509   | -2.053210 | -0.088865 |
| 35 | 8 | 0 | 6.219339   | -0.943673 | 0.439569  |
| 36 | 1 | 0 | 5.305063   | -3.910831 | -0.411700 |
| 37 | 1 | 0 | 7.721939   | -3.494253 | -0.743302 |
| 38 | 7 | 0 | 7.604063   | -2.633311 | -0.215525 |
| 39 | 6 | 0 | 8.854071   | -1.964212 | 0.169266  |
| 40 | 6 | 0 | 9.900580   | -2.261163 | -0.933408 |
| 41 | 8 | 0 | 9.824783   | -3.291544 | -1.609960 |

|    |   |   |            |           |           |
|----|---|---|------------|-----------|-----------|
| 42 | 1 | 0 | 10.769681  | -0.462774 | -0.496636 |
| 43 | 7 | 0 | 10.870248  | -1.321058 | -1.038291 |
| 44 | 6 | 0 | 11.975577  | -1.441872 | -1.977689 |
| 45 | 1 | 0 | 8.661150   | -0.888005 | 0.222457  |
| 46 | 1 | 0 | 12.934580  | -1.314616 | -1.461911 |
| 47 | 1 | 0 | 11.937628  | -2.436098 | -2.427212 |
| 48 | 1 | 0 | 11.902640  | -0.691011 | -2.774794 |
| 49 | 6 | 0 | -11.978221 | 2.510958  | 0.794883  |
| 50 | 6 | 0 | -10.839081 | 1.759785  | 0.121725  |
| 51 | 8 | 0 | -10.866869 | 0.522870  | 0.018603  |
| 52 | 1 | 0 | -9.787590  | 3.519564  | -0.154225 |
| 53 | 7 | 0 | -9.821725  | 2.523171  | -0.344147 |
| 54 | 6 | 0 | -8.600099  | 1.967373  | -0.934778 |
| 55 | 6 | 0 | -7.424406  | 2.861748  | -0.470021 |
| 56 | 8 | 0 | -7.615544  | 4.038906  | -0.139915 |
| 57 | 1 | 0 | -12.906177 | 2.292513  | 0.256876  |
| 58 | 1 | 0 | -12.091484 | 2.132832  | 1.815883  |
| 59 | 1 | 0 | -11.826201 | 3.594059  | 0.825454  |
| 60 | 1 | 0 | -8.466495  | 0.947086  | -0.563299 |
| 61 | 1 | 0 | -6.131299  | 1.257278  | -0.657331 |
| 62 | 7 | 0 | -6.208241  | 2.265375  | -0.491997 |
| 63 | 6 | 0 | -5.001287  | 3.003526  | -0.103937 |
| 64 | 6 | 0 | -3.775091  | 2.139061  | -0.469231 |
| 65 | 8 | 0 | -3.849838  | 0.906496  | -0.512723 |
| 66 | 1 | 0 | -4.975939  | 3.944443  | -0.672610 |
| 67 | 1 | 0 | -2.612272  | 3.839168  | -0.615954 |
| 68 | 7 | 0 | -2.631880  | 2.829225  | -0.703394 |
| 69 | 6 | 0 | -1.343912  | 2.159178  | -0.933997 |
| 70 | 6 | 0 | -0.285087  | 2.805125  | -0.010490 |
| 71 | 8 | 0 | -0.209509  | 4.031035  | 0.116170  |
| 72 | 1 | 0 | -1.481123  | 1.103151  | -0.682127 |
| 73 | 1 | 0 | 0.322226   | 0.909508  | 0.520819  |
| 74 | 7 | 0 | 0.543843   | 1.906517  | 0.584039  |
| 75 | 6 | 0 | 1.684043   | 2.325664  | 1.410813  |
| 76 | 6 | 0 | 2.960446   | 1.731302  | 0.769392  |
| 77 | 8 | 0 | 3.122117   | 0.508825  | 0.692229  |
| 78 | 1 | 0 | 1.692805   | 3.422119  | 1.383310  |
| 79 | 1 | 0 | 3.642095   | 3.623819  | 0.339232  |
| 80 | 7 | 0 | 3.855645   | 2.635716  | 0.286594  |
| 81 | 6 | 0 | 5.067615   | 2.226396  | -0.447030 |
| 82 | 6 | 0 | 6.320034   | 2.715203  | 0.318112  |
| 83 | 8 | 0 | 6.633875   | 3.915823  | 0.347148  |
| 84 | 1 | 0 | 5.041436   | 1.131746  | -0.471107 |

|     |   |   |           |           |           |
|-----|---|---|-----------|-----------|-----------|
| 85  | 1 | 0 | 6.747292  | 0.758435  | 0.837367  |
| 86  | 7 | 0 | 7.023898  | 1.739552  | 0.938842  |
| 87  | 6 | 0 | 8.259862  | 2.057099  | 1.681623  |
| 88  | 6 | 0 | 9.439836  | 2.125764  | 0.673601  |
| 89  | 8 | 0 | 10.182058 | 1.159091  | 0.445270  |
| 90  | 1 | 0 | 8.767511  | 3.967634  | 0.173324  |
| 91  | 7 | 0 | 9.549501  | 3.325726  | 0.051889  |
| 92  | 6 | 0 | 10.501620 | 3.563044  | -1.024370 |
| 93  | 1 | 0 | 8.116319  | 3.049688  | 2.128316  |
| 94  | 1 | 0 | 10.741786 | 4.629566  | -1.066777 |
| 95  | 1 | 0 | 11.414378 | 2.996989  | -0.824985 |
| 96  | 1 | 0 | 10.105398 | 3.249525  | -1.999558 |
| 97  | 6 | 0 | -8.828017 | -1.883360 | -2.379899 |
| 98  | 1 | 0 | -8.912258 | -0.766989 | -2.406331 |
| 99  | 1 | 0 | -8.025199 | -2.187777 | -3.095345 |
| 100 | 1 | 0 | -9.796818 | -2.326541 | -2.715450 |
| 101 | 6 | 0 | -1.603627 | -2.281522 | -2.271407 |
| 102 | 1 | 0 | -1.529053 | -1.187607 | -2.489600 |
| 103 | 1 | 0 | -0.660771 | -2.778273 | -2.607424 |
| 104 | 1 | 0 | -2.455792 | -2.701352 | -2.859874 |
| 105 | 6 | 0 | -5.166615 | -2.097116 | 2.437876  |
| 106 | 1 | 0 | -5.222285 | -3.173473 | 2.737328  |
| 107 | 1 | 0 | -4.217073 | -1.667704 | 2.841570  |
| 108 | 1 | 0 | -6.026505 | -1.552914 | 2.898347  |
| 109 | 6 | 0 | 1.842286  | -2.865640 | 2.263169  |
| 110 | 1 | 0 | 1.810271  | -3.977993 | 2.363625  |
| 111 | 1 | 0 | 2.822898  | -2.499271 | 2.654825  |
| 112 | 1 | 0 | 1.025715  | -2.430144 | 2.889412  |
| 113 | 6 | 0 | 5.208109  | -2.732249 | -2.171400 |
| 114 | 1 | 0 | 4.332601  | -3.283617 | -2.597857 |
| 115 | 1 | 0 | 5.151763  | -1.667578 | -2.503493 |
| 116 | 1 | 0 | 6.143286  | -3.185464 | -2.581700 |
| 117 | 6 | 0 | 9.411449  | -2.414763 | 1.497614  |
| 118 | 1 | 0 | 8.654990  | -2.282756 | 2.309869  |
| 119 | 1 | 0 | 9.714232  | -3.489831 | 1.469876  |
| 120 | 1 | 0 | 10.308900 | -1.795092 | 1.744807  |
| 121 | 6 | 0 | 8.574105  | 1.058404  | 2.759517  |
| 122 | 1 | 0 | 7.735490  | 0.986007  | 3.494102  |
| 123 | 1 | 0 | 8.763096  | 0.042295  | 2.328397  |
| 124 | 1 | 0 | 9.497988  | 1.383543  | 3.298200  |
| 125 | 6 | 0 | 5.130145  | 2.769572  | -1.851737 |
| 126 | 1 | 0 | 4.232699  | 2.459629  | -2.440211 |
| 127 | 1 | 0 | 5.191654  | 3.886232  | -1.849550 |

|     |   |   |           |          |           |
|-----|---|---|-----------|----------|-----------|
| 128 | 1 | 0 | 6.042111  | 2.369431 | -2.358893 |
| 129 | 6 | 0 | 1.613066  | 1.862878 | 2.843664  |
| 130 | 1 | 0 | 0.692039  | 2.254335 | 3.340152  |
| 131 | 1 | 0 | 1.605395  | 0.746176 | 2.904834  |
| 132 | 1 | 0 | 2.505908  | 2.241649 | 3.398630  |
| 133 | 6 | 0 | -0.844605 | 2.263863 | -2.355044 |
| 134 | 1 | 0 | -1.577461 | 1.807298 | -3.064226 |
| 135 | 1 | 0 | -0.677234 | 3.328222 | -2.651284 |
| 136 | 1 | 0 | 0.123768  | 1.712826 | -2.442647 |
| 137 | 6 | 0 | -4.918795 | 3.357882 | 1.363347  |
| 138 | 1 | 0 | -4.883099 | 2.444309 | 2.004637  |
| 139 | 1 | 0 | -3.999008 | 3.963036 | 1.552795  |
| 140 | 1 | 0 | -5.811254 | 3.965930 | 1.657649  |
| 141 | 6 | 0 | -8.597184 | 1.911151 | -2.443457 |
| 142 | 1 | 0 | -8.568796 | 2.932874 | -2.893166 |
| 143 | 1 | 0 | -7.695280 | 1.339268 | -2.778047 |
| 144 | 1 | 0 | -9.508908 | 1.385709 | -2.820557 |



P Pl (Ac-AAAAAA-NHMe)<sub>3</sub>

|    |   |   |            |           |           |
|----|---|---|------------|-----------|-----------|
| 1  | 6 | 0 | -10.463680 | -4.349967 | 3.375376  |
| 2  | 6 | 0 | -9.515216  | -4.927838 | 2.335428  |
| 3  | 8 | 0 | -8.844387  | -5.947114 | 2.556903  |
| 4  | 1 | 0 | -9.902873  | -3.337219 | 1.047742  |
| 5  | 7 | 0 | -9.474188  | -4.259136 | 1.151704  |
| 6  | 6 | 0 | -8.573410  | -4.705104 | 0.074577  |
| 7  | 6 | 0 | -7.166874  | -4.107793 | 0.326969  |
| 8  | 8 | 0 | -6.817301  | -3.022922 | -0.165985 |
| 9  | 1 | 0 | -11.247916 | -5.086934 | 3.578897  |
| 10 | 1 | 0 | -9.911100  | -4.190769 | 4.306611  |
| 11 | 1 | 0 | -10.923051 | -3.410857 | 3.053137  |
| 12 | 1 | 0 | -8.515524  | -5.799170 | 0.139471  |
| 13 | 1 | 0 | -6.824136  | -5.653218 | 1.602056  |
| 14 | 7 | 0 | -6.393134  | -4.848199 | 1.153871  |
| 15 | 6 | 0 | -5.060577  | -4.407625 | 1.595142  |
| 16 | 6 | 0 | -3.963291  | -5.226422 | 0.859860  |
| 17 | 8 | 0 | -3.975189  | -6.457916 | 0.844407  |
| 18 | 1 | 0 | -4.970378  | -3.347426 | 1.333918  |
| 19 | 1 | 0 | -3.098956  | -3.443431 | 0.257725  |
| 20 | 7 | 0 | -2.992146  | -4.458075 | 0.287039  |
| 21 | 6 | 0 | -1.860394  | -5.063500 | -0.416695 |
| 22 | 6 | 0 | -0.554420  | -4.392124 | 0.064524  |
| 23 | 8 | 0 | -0.482287  | -3.162499 | 0.202701  |
| 24 | 1 | 0 | -1.872962  | -6.128389 | -0.152652 |
| 25 | 1 | 0 | 0.387617   | -6.221390 | 0.100661  |
| 26 | 7 | 0 | 0.482563   | -5.230844 | 0.293995  |
| 27 | 6 | 0 | 1.823726   | -4.760113 | 0.663173  |
| 28 | 6 | 0 | 2.851235   | -5.406832 | -0.296426 |
| 29 | 8 | 0 | 2.702987   | -6.557483 | -0.716089 |
| 30 | 1 | 0 | 1.831842   | -3.671266 | 0.552153  |
| 31 | 1 | 0 | 3.903101   | -3.630816 | -0.311724 |
| 32 | 7 | 0 | 3.923170   | -4.617754 | -0.571081 |
| 33 | 6 | 0 | 5.036617   | -5.092585 | -1.393724 |
| 34 | 6 | 0 | 6.312498   | -4.339836 | -0.954042 |
| 35 | 8 | 0 | 6.236297   | -3.231726 | -0.401150 |
| 36 | 1 | 0 | 5.150369   | -6.167676 | -1.200686 |
| 37 | 1 | 0 | 7.497081   | -5.803511 | -1.786442 |
| 38 | 7 | 0 | 7.482124   | -4.957199 | -1.224961 |
| 39 | 6 | 0 | 8.787375   | -4.313828 | -1.015250 |
| 40 | 6 | 0 | 9.590327   | -4.422737 | -2.334951 |
| 41 | 8 | 0 | 9.456020   | -5.401782 | -3.075229 |

|    |   |   |            |           |           |
|----|---|---|------------|-----------|-----------|
| 42 | 1 | 0 | 10.371376  | -2.579979 | -1.924572 |
| 43 | 7 | 0 | 10.432083  | -3.382338 | -2.550702 |
| 44 | 6 | 0 | 11.305707  | -3.316050 | -3.712436 |
| 45 | 1 | 0 | 8.607207   | -3.262187 | -0.773041 |
| 46 | 1 | 0 | 12.339911  | -3.118582 | -3.406266 |
| 47 | 1 | 0 | 11.260938  | -4.275810 | -4.231131 |
| 48 | 1 | 0 | 10.987320  | -2.525885 | -4.404593 |
| 49 | 6 | 0 | -11.811862 | 0.307597  | 0.800632  |
| 50 | 6 | 0 | -10.549739 | -0.401488 | 0.334526  |
| 51 | 8 | 0 | -10.342792 | -1.591720 | 0.620910  |
| 52 | 1 | 0 | -9.953351  | 1.317886  | -0.613742 |
| 53 | 7 | 0 | -9.687948  | 0.357825  | -0.388894 |
| 54 | 6 | 0 | -8.421115  | -0.171641 | -0.913798 |
| 55 | 6 | 0 | -7.223630  | 0.557925  | -0.250835 |
| 56 | 8 | 0 | -7.213076  | 1.796649  | -0.146997 |
| 57 | 1 | 0 | -12.675548 | -0.298373 | 0.508844  |
| 58 | 1 | 0 | -11.797350 | 0.353838  | 1.895279  |
| 59 | 1 | 0 | -11.907522 | 1.316401  | 0.392159  |
| 60 | 1 | 0 | -8.388566  | -1.238098 | -0.666481 |
| 61 | 1 | 0 | -6.308984  | -1.258249 | 0.087868  |
| 62 | 7 | 0 | -6.208968  | -0.239013 | 0.149548  |
| 63 | 6 | 0 | -5.009040  | 0.318397  | 0.798210  |
| 64 | 6 | 0 | -3.764113  | -0.401133 | 0.235461  |
| 65 | 8 | 0 | -3.653251  | -1.630189 | 0.322484  |
| 66 | 1 | 0 | -4.983026  | 1.384710  | 0.554504  |
| 67 | 1 | 0 | -3.039937  | 1.401765  | -0.433373 |
| 68 | 7 | 0 | -2.827223  | 0.409879  | -0.313887 |
| 69 | 6 | 0 | -1.577486  | -0.126766 | -0.876345 |
| 70 | 6 | 0 | -0.368057  | 0.452775  | -0.102050 |
| 71 | 8 | 0 | -0.213765  | 1.680855  | 0.002227  |
| 72 | 1 | 0 | -1.618765  | -1.214259 | -0.752126 |
| 73 | 1 | 0 | 0.248077   | -1.458062 | 0.346878  |
| 74 | 7 | 0 | 0.488881   | -0.463445 | 0.399137  |
| 75 | 6 | 0 | 1.707145   | -0.071027 | 1.128003  |
| 76 | 6 | 0 | 2.945145   | -0.622243 | 0.377620  |
| 77 | 8 | 0 | 3.071560   | -1.837165 | 0.171817  |
| 78 | 1 | 0 | 1.725597   | 1.023980  | 1.143023  |
| 79 | 1 | 0 | 3.654610   | 1.300706  | 0.140377  |
| 80 | 7 | 0 | 3.852978   | 0.309221  | -0.001328 |
| 81 | 6 | 0 | 5.082495   | -0.064904 | -0.717531 |
| 82 | 6 | 0 | 6.312331   | 0.325414  | 0.134891  |
| 83 | 8 | 0 | 6.464261   | 1.492879  | 0.529553  |
| 84 | 1 | 0 | 5.047743   | -1.150477 | -0.853483 |

|     |   |   |            |           |           |
|-----|---|---|------------|-----------|-----------|
| 85  | 1 | 0 | 6.950873   | -1.625034 | 0.090585  |
| 86  | 7 | 0 | 7.184956   | -0.671482 | 0.384419  |
| 87  | 6 | 0 | 8.427190   | -0.448256 | 1.142368  |
| 88  | 6 | 0 | 9.633583   | -0.310025 | 0.174124  |
| 89  | 8 | 0 | 9.890979   | -1.195500 | -0.656730 |
| 90  | 1 | 0 | 10.093966  | 1.543488  | 0.969921  |
| 91  | 7 | 0 | 10.378071  | 0.802099  | 0.327437  |
| 92  | 6 | 0 | 11.560024  | 1.047163  | -0.489278 |
| 93  | 1 | 0 | 8.294570   | 0.483152  | 1.705095  |
| 94  | 1 | 0 | 12.052484  | 1.947204  | -0.114709 |
| 95  | 1 | 0 | 12.252364  | 0.200752  | -0.429431 |
| 96  | 1 | 0 | 11.293573  | 1.192985  | -1.543335 |
| 97  | 6 | 0 | -12.040851 | 5.148707  | -0.971949 |
| 98  | 6 | 0 | -10.824276 | 4.260553  | -1.187027 |
| 99  | 8 | 0 | -10.878119 | 3.040997  | -0.965494 |
| 100 | 1 | 0 | -9.680681  | 5.892783  | -1.741871 |
| 101 | 7 | 0 | -9.704817  | 4.885806  | -1.627040 |
| 102 | 6 | 0 | -8.424555  | 4.193849  | -1.811502 |
| 103 | 6 | 0 | -7.308319  | 5.141499  | -1.316164 |
| 104 | 8 | 0 | -7.396648  | 6.365224  | -1.464819 |
| 105 | 1 | 0 | -12.855668 | 4.784971  | -1.606024 |
| 106 | 1 | 0 | -12.363632 | 5.051992  | 0.069490  |
| 107 | 1 | 0 | -11.854023 | 6.203490  | -1.195301 |
| 108 | 1 | 0 | -8.439540  | 3.281947  | -1.206038 |
| 109 | 1 | 0 | -6.326731  | 3.510223  | -0.533469 |
| 110 | 7 | 0 | -6.243667  | 4.502485  | -0.767109 |
| 111 | 6 | 0 | -5.058578  | 5.233500  | -0.316127 |
| 112 | 6 | 0 | -3.805522  | 4.386768  | -0.637146 |
| 113 | 8 | 0 | -3.843898  | 3.149581  | -0.605972 |
| 114 | 1 | 0 | -5.038769  | 6.177400  | -0.875820 |
| 115 | 1 | 0 | -2.690024  | 6.106092  | -0.872012 |
| 116 | 7 | 0 | -2.685043  | 5.092768  | -0.916811 |
| 117 | 6 | 0 | -1.375657  | 4.455471  | -1.110710 |
| 118 | 6 | 0 | -0.337058  | 5.222635  | -0.260122 |
| 119 | 8 | 0 | -0.396717  | 6.448998  | -0.130262 |
| 120 | 1 | 0 | -1.455096  | 3.419932  | -0.766408 |
| 121 | 1 | 0 | 0.526025   | 3.413625  | 0.219996  |
| 122 | 7 | 0 | 0.632387   | 4.429865  | 0.268290  |
| 123 | 6 | 0 | 1.745324   | 4.987582  | 1.041036  |
| 124 | 6 | 0 | 3.054924   | 4.340664  | 0.535840  |
| 125 | 8 | 0 | 3.139550   | 3.119365  | 0.370181  |
| 126 | 1 | 0 | 1.737615   | 6.068493  | 0.853455  |
| 127 | 1 | 0 | 3.940645   | 6.193399  | 0.460287  |

|     |   |   |            |           |           |
|-----|---|---|------------|-----------|-----------|
| 128 | 7 | 0 | 4.081203   | 5.201955  | 0.311117  |
| 129 | 6 | 0 | 5.414197   | 4.759827  | -0.139497 |
| 130 | 6 | 0 | 6.446345   | 5.092347  | 0.964785  |
| 131 | 8 | 0 | 6.736539   | 6.265926  | 1.245733  |
| 132 | 1 | 0 | 5.342865   | 3.675727  | -0.280696 |
| 133 | 1 | 0 | 6.767337   | 3.070332  | 1.240421  |
| 134 | 7 | 0 | 6.972124   | 4.012612  | 1.585999  |
| 135 | 6 | 0 | 7.993502   | 4.168237  | 2.637284  |
| 136 | 6 | 0 | 9.380834   | 4.279483  | 1.954542  |
| 137 | 8 | 0 | 10.113788  | 3.297213  | 1.763163  |
| 138 | 1 | 0 | 8.933690   | 6.221109  | 1.600188  |
| 139 | 7 | 0 | 9.689014   | 5.539985  | 1.559830  |
| 140 | 6 | 0 | 10.879357  | 5.850100  | 0.780204  |
| 141 | 1 | 0 | 7.772487   | 5.108397  | 3.158698  |
| 142 | 1 | 0 | 11.234339  | 6.853446  | 1.035402  |
| 143 | 1 | 0 | 11.655878  | 5.121204  | 1.021171  |
| 144 | 1 | 0 | 10.683256  | 5.807208  | -0.299518 |
| 145 | 6 | 0 | -9.049976  | -4.297940 | -1.292767 |
| 146 | 1 | 0 | -9.172950  | -3.187396 | -1.361056 |
| 147 | 1 | 0 | -8.295750  | -4.615480 | -2.053474 |
| 148 | 1 | 0 | -10.028746 | -4.781143 | -1.529782 |
| 149 | 6 | 0 | -4.845348  | -4.582785 | 3.077793  |
| 150 | 1 | 0 | -4.911747  | -5.659853 | 3.371412  |
| 151 | 1 | 0 | -3.828584  | -4.204780 | 3.346869  |
| 152 | 1 | 0 | -5.604029  | -4.006920 | 3.661492  |
| 153 | 6 | 0 | -1.914527  | -4.940652 | -1.921790 |
| 154 | 1 | 0 | -1.912840  | -3.869582 | -2.240408 |
| 155 | 1 | 0 | -1.024634  | -5.447955 | -2.368099 |
| 156 | 1 | 0 | -2.838310  | -5.427146 | -2.319931 |
| 157 | 6 | 0 | 2.222989   | -5.105321 | 2.078103  |
| 158 | 1 | 0 | 2.243708   | -6.210649 | 2.239873  |
| 159 | 1 | 0 | 3.243052   | -4.695344 | 2.279829  |
| 160 | 1 | 0 | 1.508766   | -4.653003 | 2.808774  |
| 161 | 6 | 0 | 4.853195   | -4.908098 | -2.882867 |
| 162 | 1 | 0 | 4.760784   | -3.828606 | -3.154137 |
| 163 | 1 | 0 | 5.726977   | -5.340064 | -3.429134 |
| 164 | 1 | 0 | 3.928656   | -5.438190 | -3.222224 |
| 165 | 6 | 0 | 9.601194   | -4.929292 | 0.096337  |
| 166 | 1 | 0 | 9.858883   | -5.993429 | -0.126027 |
| 167 | 1 | 0 | 10.548883  | -4.348312 | 0.215636  |
| 168 | 1 | 0 | 9.040939   | -4.894996 | 1.062730  |
| 169 | 6 | 0 | -8.276164  | -0.008288 | -2.408207 |
| 170 | 1 | 0 | -8.278004  | 1.072693  | -2.699028 |

|     |   |   |           |           |           |
|-----|---|---|-----------|-----------|-----------|
| 171 | 1 | 0 | -7.309304 | -0.464245 | -2.734481 |
| 172 | 1 | 0 | -9.109731 | -0.523073 | -2.944859 |
| 173 | 6 | 0 | -1.383712 | 0.208761  | -2.335453 |
| 174 | 1 | 0 | -1.320284 | 1.315515  | -2.488577 |
| 175 | 1 | 0 | -0.433435 | -0.254829 | -2.696955 |
| 176 | 1 | 0 | -2.228754 | -0.188416 | -2.948641 |
| 177 | 6 | 0 | -4.992215 | 0.153596  | 2.299719  |
| 178 | 1 | 0 | -4.996025 | -0.927472 | 2.585024  |
| 179 | 1 | 0 | -4.067252 | 0.626090  | 2.711534  |
| 180 | 1 | 0 | -5.880824 | 0.649117  | 2.760720  |
| 181 | 6 | 0 | 1.756029  | -0.596239 | 2.541672  |
| 182 | 1 | 0 | 1.751335  | -1.714925 | 2.553902  |
| 183 | 1 | 0 | 2.693240  | -0.239935 | 3.034839  |
| 184 | 1 | 0 | 0.881170  | -0.229611 | 3.131521  |
| 185 | 6 | 0 | 5.224551  | 0.606693  | -2.061629 |
| 186 | 1 | 0 | 4.364941  | 0.347140  | -2.726123 |
| 187 | 1 | 0 | 5.267647  | 1.718824  | -1.952176 |
| 188 | 1 | 0 | 6.168556  | 0.260319  | -2.549159 |
| 189 | 6 | 0 | 8.735525  | -1.571750 | 2.100224  |
| 190 | 1 | 0 | 7.898146  | -1.720704 | 2.824576  |
| 191 | 1 | 0 | 8.905742  | -2.532534 | 1.550204  |
| 192 | 1 | 0 | 9.662497  | -1.323403 | 2.672863  |
| 193 | 6 | 0 | 8.007203  | 3.034455  | 3.624075  |
| 194 | 1 | 0 | 7.014475  | 2.928811  | 4.125287  |
| 195 | 1 | 0 | 8.261066  | 2.067557  | 3.122625  |
| 196 | 1 | 0 | 8.784215  | 3.237519  | 4.401457  |
| 197 | 6 | 0 | 5.859861  | 5.415386  | -1.421147 |
| 198 | 1 | 0 | 5.125639  | 5.227572  | -2.241866 |
| 199 | 1 | 0 | 5.977929  | 6.519584  | -1.289711 |
| 200 | 1 | 0 | 6.847652  | 4.989634  | -1.724830 |
| 201 | 6 | 0 | 1.657613  | 4.756254  | 2.530857  |
| 202 | 1 | 0 | 0.727412  | 5.216737  | 2.944530  |
| 203 | 1 | 0 | 1.650701  | 3.664617  | 2.770667  |
| 204 | 1 | 0 | 2.539619  | 5.225387  | 3.031370  |
| 205 | 6 | 0 | -0.900088 | 4.447638  | -2.543651 |
| 206 | 1 | 0 | -1.624575 | 3.898601  | -3.193752 |
| 207 | 1 | 0 | -0.779304 | 5.484351  | -2.941857 |
| 208 | 1 | 0 | 0.086994  | 3.925599  | -2.596186 |
| 209 | 6 | 0 | -5.038021 | 5.561157  | 1.159307  |
| 210 | 1 | 0 | -5.055188 | 4.634404  | 1.783075  |
| 211 | 1 | 0 | -4.112089 | 6.137881  | 1.401370  |
| 212 | 1 | 0 | -5.924754 | 6.185570  | 1.429837  |
| 213 | 6 | 0 | -8.121906 | 3.815113  | -3.242227 |

|     |   |   |           |          |           |
|-----|---|---|-----------|----------|-----------|
| 214 | 1 | 0 | -8.037888 | 4.716948 | -3.896068 |
| 215 | 1 | 0 | -7.153676 | 3.257339 | -3.274414 |
| 216 | 1 | 0 | -8.925129 | 3.154059 | -3.650850 |

P PI (Ac-AAAAAA-NHMe)<sub>4</sub>

|    |   |   |           |           |           |
|----|---|---|-----------|-----------|-----------|
| 1  | 6 | 0 | 11.584388 | -1.999011 | -1.758242 |
| 2  | 6 | 0 | 10.426485 | -2.752016 | -1.120297 |
| 3  | 1 | 0 | 12.515265 | -2.516603 | -1.504922 |
| 4  | 1 | 0 | 11.468477 | -2.044262 | -2.846797 |
| 5  | 1 | 0 | 11.636608 | -0.955603 | -1.437698 |
| 6  | 8 | 0 | 10.271384 | -3.969178 | -1.315777 |
| 7  | 7 | 0 | 9.600228  | -1.999194 | -0.353394 |
| 8  | 1 | 0 | 9.806214  | -1.005206 | -0.230167 |
| 9  | 6 | 0 | 8.416922  | -2.553204 | 0.320901  |
| 10 | 6 | 0 | 7.154222  | -1.844499 | -0.228965 |
| 11 | 6 | 0 | 8.432929  | -2.365891 | 1.818902  |
| 12 | 1 | 0 | 8.380740  | -3.623387 | 0.091782  |
| 13 | 8 | 0 | 7.093785  | -0.603710 | -0.252708 |
| 14 | 7 | 0 | 6.164186  | -2.659186 | -0.649995 |
| 15 | 1 | 0 | 9.325840  | -2.863233 | 2.269493  |
| 16 | 1 | 0 | 8.453957  | -1.280835 | 2.088925  |
| 17 | 1 | 0 | 7.512246  | -2.824961 | 2.255355  |
| 18 | 1 | 0 | 6.293549  | -3.675971 | -0.605469 |
| 19 | 6 | 0 | 4.918638  | -2.131755 | -1.234034 |
| 20 | 6 | 0 | 3.724862  | -2.845983 | -0.562794 |
| 21 | 6 | 0 | 4.806812  | -2.352166 | -2.724042 |
| 22 | 1 | 0 | 4.894156  | -1.057787 | -1.024392 |
| 23 | 8 | 0 | 3.626271  | -4.079447 | -0.604271 |
| 24 | 7 | 0 | 2.824728  | -2.031302 | 0.036101  |
| 25 | 1 | 0 | 4.804317  | -3.443238 | -2.969422 |
| 26 | 1 | 0 | 3.851328  | -1.903716 | -3.090673 |
| 27 | 1 | 0 | 5.657355  | -1.866422 | -3.260791 |
| 28 | 1 | 0 | 3.001704  | -1.025112 | 0.067176  |
| 29 | 6 | 0 | 1.635107  | -2.570213 | 0.712077  |
| 30 | 6 | 0 | 0.368815  | -1.943878 | 0.084374  |
| 31 | 6 | 0 | 1.599219  | -2.288964 | 2.194907  |
| 32 | 1 | 0 | 1.645374  | -3.652653 | 0.547063  |
| 33 | 8 | 0 | 0.231226  | -0.710805 | 0.038826  |
| 34 | 7 | 0 | -0.544165 | -2.831654 | -0.366379 |
| 35 | 1 | 0 | 2.495101  | -2.723662 | 2.701120  |
| 36 | 1 | 0 | 1.574078  | -1.189301 | 2.394993  |
| 37 | 1 | 0 | 0.682259  | -2.751709 | 2.634966  |
| 38 | 1 | 0 | -0.311070 | -3.828766 | -0.362306 |
| 39 | 6 | 0 | -1.829850 | -2.413846 | -0.950352 |
| 40 | 6 | 0 | -2.983358 | -2.943040 | -0.059590 |
| 41 | 6 | 0 | -2.051086 | -2.943810 | -2.345976 |

|    |   |   |            |           |           |
|----|---|---|------------|-----------|-----------|
| 42 | 1 | 0 | -1.834247  | -1.318664 | -0.967128 |
| 43 | 8 | 0 | -3.071287  | -4.150565 | 0.206277  |
| 44 | 7 | 0 | -3.862971  | -2.006615 | 0.365565  |
| 45 | 1 | 0 | -1.243078  | -2.597010 | -3.034819 |
| 46 | 1 | 0 | -2.069458  | -4.062911 | -2.352335 |
| 47 | 1 | 0 | -3.031731  | -2.570386 | -2.729933 |
| 48 | 1 | 0 | -3.681471  | -1.019985 | 0.167043  |
| 49 | 6 | 0 | -4.994021  | -2.357261 | 1.238505  |
| 50 | 6 | 0 | -6.313583  | -1.876094 | 0.592909  |
| 51 | 6 | 0 | -4.911552  | -1.740848 | 2.614629  |
| 52 | 1 | 0 | -4.992248  | -3.447948 | 1.329445  |
| 53 | 8 | 0 | -6.469967  | -0.684184 | 0.280921  |
| 54 | 7 | 0 | -7.256089  | -2.829026 | 0.434687  |
| 55 | 1 | 0 | -3.977604  | -2.062434 | 3.136202  |
| 56 | 1 | 0 | -4.921583  | -0.624359 | 2.555640  |
| 57 | 1 | 0 | -5.789817  | -2.072786 | 3.220580  |
| 58 | 1 | 0 | -7.016931  | -3.802650 | 0.644502  |
| 59 | 6 | 0 | -8.595890  | -2.525437 | -0.097846 |
| 60 | 6 | 0 | -9.626574  | -2.485394 | 1.062590  |
| 61 | 6 | 0 | -9.070964  | -3.542680 | -1.104500 |
| 62 | 1 | 0 | -8.535981  | -1.539415 | -0.573483 |
| 63 | 8 | 0 | -9.811869  | -3.473742 | 1.791598  |
| 64 | 7 | 0 | -10.296007 | -1.325731 | 1.200857  |
| 65 | 1 | 0 | -10.067907 | -3.229708 | -1.500667 |
| 66 | 1 | 0 | -8.356727  | -3.622804 | -1.959656 |
| 67 | 1 | 0 | -9.178803  | -4.553336 | -0.633668 |
| 68 | 1 | 0 | -10.083034 | -0.533549 | 0.592082  |
| 69 | 6 | 0 | -11.304938 | -1.150467 | 2.236510  |
| 70 | 1 | 0 | -11.767701 | -0.169170 | 2.106752  |
| 71 | 1 | 0 | -12.075656 | -1.925918 | 2.164828  |
| 72 | 1 | 0 | -10.860929 | -1.208217 | 3.237691  |
| 73 | 1 | 0 | -6.978683  | 0.872320  | -0.460023 |
| 74 | 7 | 0 | -7.119312  | 1.801617  | -0.869399 |
| 75 | 6 | 0 | -6.258651  | 2.793432  | -0.567238 |
| 76 | 6 | 0 | -8.205930  | 1.985695  | -1.844975 |
| 77 | 6 | 0 | -5.163626  | 2.439427  | 0.467246  |
| 78 | 8 | 0 | -6.310312  | 3.933270  | -1.057628 |
| 79 | 6 | 0 | -9.574746  | 1.952088  | -1.121905 |
| 80 | 1 | 0 | -8.049090  | 2.966852  | -2.306354 |
| 81 | 7 | 0 | -3.853812  | 2.812483  | -0.090307 |
| 82 | 6 | 0 | -5.492478  | 3.152289  | 1.755284  |
| 83 | 1 | 0 | -5.146073  | 1.358276  | 0.641715  |
| 84 | 8 | 0 | -9.903241  | 0.981006  | -0.422362 |



|     |   |   |            |          |           |
|-----|---|---|------------|----------|-----------|
| 85  | 7 | 0 | -10.367988 | 3.021104 | -1.332129 |
| 86  | 6 | 0 | -2.935566  | 1.884137 | -0.441414 |
| 87  | 1 | 0 | -3.650235  | 3.802519 | -0.234456 |
| 88  | 1 | 0 | -4.727929  | 2.927052 | 2.538055  |
| 89  | 1 | 0 | -5.531828  | 4.259594 | 1.604158  |
| 90  | 1 | 0 | -6.489994  | 2.806633 | 2.122026  |
| 91  | 1 | 0 | -10.024164 | 3.827850 | -1.856294 |
| 92  | 6 | 0 | -11.696411 | 3.119499 | -0.741798 |
| 93  | 6 | 0 | -1.649642  | 2.441203 | -1.094716 |
| 94  | 8 | 0 | -3.083316  | 0.664771 | -0.280241 |
| 95  | 1 | 0 | -12.266184 | 3.875394 | -1.287928 |
| 96  | 1 | 0 | -12.208469 | 2.155434 | -0.810292 |
| 97  | 1 | 0 | -11.647463 | 3.406280 | 0.316762  |
| 98  | 7 | 0 | -0.487597  | 2.009829 | -0.301092 |
| 99  | 6 | 0 | -1.616829  | 1.959883 | -2.525008 |
| 100 | 1 | 0 | -1.655473  | 3.535905 | -1.079012 |
| 101 | 6 | 0 | 0.386653   | 2.899197 | 0.215138  |
| 102 | 1 | 0 | -0.308828  | 1.004780 | -0.203154 |
| 103 | 1 | 0 | -0.702225  | 2.332154 | -3.047080 |
| 104 | 1 | 0 | -1.624920  | 0.842471 | -2.571686 |
| 105 | 1 | 0 | -2.516599  | 2.344848 | -3.064140 |
| 106 | 6 | 0 | 1.545252   | 2.288232 | 1.041801  |
| 107 | 8 | 0 | 0.289362   | 4.130450 | 0.080345  |
| 108 | 7 | 0 | 2.826917   | 2.791563 | 0.521008  |
| 109 | 6 | 0 | 1.305983   | 2.639690 | 2.490244  |
| 110 | 1 | 0 | 1.556907   | 1.198893 | 0.927733  |
| 111 | 1 | 0 | 3.038419   | 3.785886 | 0.625746  |
| 112 | 6 | 0 | 3.775770   | 1.965387 | 0.020602  |
| 113 | 1 | 0 | 2.115935   | 2.224022 | 3.137512  |
| 114 | 1 | 0 | 0.330180   | 2.204891 | 2.818039  |
| 115 | 1 | 0 | 1.267951   | 3.748798 | 2.633922  |
| 116 | 6 | 0 | 5.029205   | 2.677178 | -0.543413 |
| 117 | 8 | 0 | 3.667333   | 0.732314 | -0.033115 |
| 118 | 7 | 0 | 6.236692   | 2.085262 | 0.052698  |
| 119 | 6 | 0 | 4.975498   | 2.562710 | -2.048343 |
| 120 | 1 | 0 | 5.024125   | 3.735020 | -0.262052 |
| 121 | 6 | 0 | 7.176001   | 2.847426 | 0.655134  |
| 122 | 1 | 0 | 6.418900   | 1.086466 | -0.091264 |
| 123 | 1 | 0 | 4.969872   | 1.491797 | -2.369688 |
| 124 | 1 | 0 | 4.043064   | 3.051697 | -2.422370 |
| 125 | 1 | 0 | 5.855089   | 3.069747 | -2.514222 |
| 126 | 6 | 0 | 8.356738   | 2.063640 | 1.281026  |
| 127 | 8 | 0 | 7.104465   | 4.083053 | 0.764083  |

|     |   |   |            |          |           |
|-----|---|---|------------|----------|-----------|
| 128 | 7 | 0 | 9.635921   | 2.667374 | 0.881440  |
| 129 | 6 | 0 | 8.135682   | 2.048507 | 2.775911  |
| 130 | 1 | 0 | 8.361178   | 1.034442 | 0.906422  |
| 131 | 1 | 0 | 9.851367   | 3.618656 | 1.183208  |
| 132 | 6 | 0 | 10.606004  | 1.950651 | 0.255657  |
| 133 | 1 | 0 | 8.950093   | 1.482959 | 3.290260  |
| 134 | 1 | 0 | 7.161417   | 1.548566 | 2.998638  |
| 135 | 1 | 0 | 8.105543   | 3.088126 | 3.189516  |
| 136 | 6 | 0 | 11.876983  | 2.718477 | -0.073182 |
| 137 | 8 | 0 | 10.484769  | 0.755673 | -0.058063 |
| 138 | 1 | 0 | 12.733586  | 2.134852 | 0.278257  |
| 139 | 1 | 0 | 11.958045  | 2.798540 | -1.163045 |
| 140 | 1 | 0 | 11.896097  | 3.716267 | 0.371015  |
| 141 | 1 | 0 | -6.547251  | 5.497873 | -1.807079 |
| 142 | 7 | 0 | -6.743383  | 6.433804 | -2.174461 |
| 143 | 6 | 0 | -6.314901  | 7.528250 | -1.505102 |
| 144 | 6 | 0 | -7.690216  | 6.555639 | -3.297818 |
| 145 | 6 | 0 | -5.380529  | 7.225188 | -0.308745 |
| 146 | 8 | 0 | -6.621089  | 8.692184 | -1.807829 |
| 147 | 6 | 0 | -9.126648  | 6.593328 | -2.715101 |
| 148 | 6 | 0 | -7.577536  | 5.435712 | -4.293832 |
| 149 | 1 | 0 | -7.476846  | 7.512007 | -3.792014 |
| 150 | 7 | 0 | -4.012883  | 7.665030 | -0.643912 |
| 151 | 6 | 0 | -5.943105  | 7.901174 | 0.915318  |
| 152 | 1 | 0 | -5.316988  | 6.144523 | -0.140299 |
| 153 | 8 | 0 | -9.827457  | 5.577448 | -2.593010 |
| 154 | 7 | 0 | -9.515172  | 7.831690 | -2.320827 |
| 155 | 1 | 0 | -8.314836  | 5.604584 | -5.116716 |
| 156 | 1 | 0 | -6.550853  | 5.393766 | -4.732105 |
| 157 | 1 | 0 | -7.805429  | 4.449152 | -3.818981 |
| 158 | 6 | 0 | -2.957896  | 6.810389 | -0.701145 |
| 159 | 1 | 0 | -3.861499  | 8.653453 | -0.802828 |
| 160 | 1 | 0 | -5.285126  | 7.733048 | 1.802270  |
| 161 | 1 | 0 | -6.054345  | 9.001968 | 0.752832  |
| 162 | 1 | 0 | -6.952359  | 7.475111 | 1.136762  |
| 163 | 1 | 0 | -8.790826  | 8.546642 | -2.304346 |
| 164 | 6 | 0 | -10.767804 | 8.078862 | -1.620588 |
| 165 | 6 | 0 | -1.604933  | 7.451757 | -1.087263 |
| 166 | 8 | 0 | -3.050905  | 5.597341 | -0.486353 |
| 167 | 1 | 0 | -11.162354 | 9.059151 | -1.905900 |
| 168 | 1 | 0 | -11.484835 | 7.305606 | -1.903613 |
| 169 | 1 | 0 | -10.637648 | 8.052518 | -0.530494 |
| 170 | 7 | 0 | -0.562141  | 6.882923 | -0.230832 |

|     |   |   |           |           |           |
|-----|---|---|-----------|-----------|-----------|
| 171 | 6 | 0 | -1.394322 | 7.235504  | -2.567297 |
| 172 | 1 | 0 | -1.608881 | 8.531134  | -0.889746 |
| 173 | 6 | 0 | 0.366436  | 7.666890  | 0.379876  |
| 174 | 1 | 0 | -0.462649 | 5.866196  | -0.182717 |
| 175 | 1 | 0 | -0.432049 | 7.698047  | -2.896962 |
| 176 | 1 | 0 | -2.230646 | 7.712090  | -3.134718 |
| 177 | 1 | 0 | -1.368467 | 6.146682  | -2.817894 |
| 178 | 6 | 0 | 1.325565  | 6.887925  | 1.309929  |
| 179 | 8 | 0 | 0.442636  | 8.893307  | 0.262725  |
| 180 | 7 | 0 | 2.661068  | 7.492276  | 1.211684  |
| 181 | 6 | 0 | 0.745751  | 6.906792  | 2.703956  |
| 182 | 1 | 0 | 1.410853  | 5.847794  | 0.981107  |
| 183 | 6 | 0 | 3.776436  | 6.762762  | 0.971891  |
| 184 | 1 | 0 | 2.702241  | 8.505375  | 1.211929  |
| 185 | 1 | 0 | 1.403181  | 6.342168  | 3.409527  |
| 186 | 1 | 0 | -0.258256 | 6.415674  | 2.687102  |
| 187 | 1 | 0 | 0.627427  | 7.950290  | 3.085040  |
| 188 | 6 | 0 | 5.073664  | 7.580207  | 0.777131  |
| 189 | 8 | 0 | 3.781956  | 5.528011  | 0.885705  |
| 190 | 7 | 0 | 6.195019  | 6.806805  | 1.312759  |
| 191 | 6 | 0 | 5.189495  | 7.933724  | -0.687707 |
| 192 | 1 | 0 | 5.032996  | 8.513631  | 1.352867  |
| 193 | 1 | 0 | 6.275298  | 5.818244  | 1.063151  |
| 194 | 6 | 0 | 7.202677  | 7.397926  | 2.003991  |
| 195 | 1 | 0 | 5.237853  | 7.017539  | -1.325353 |
| 196 | 1 | 0 | 4.301530  | 8.537636  | -0.996662 |
| 197 | 1 | 0 | 6.110830  | 8.539732  | -0.869345 |
| 198 | 6 | 0 | 8.254759  | 6.407672  | 2.554825  |
| 199 | 8 | 0 | 7.289428  | 8.610741  | 2.225883  |
| 200 | 7 | 0 | 9.553039  | 7.090507  | 2.542666  |
| 201 | 6 | 0 | 7.805652  | 5.946180  | 3.920708  |
| 202 | 1 | 0 | 8.325801  | 5.532485  | 1.901925  |
| 203 | 6 | 0 | 10.689205 | 6.502747  | 2.092093  |
| 204 | 1 | 0 | 9.527668  | 8.084944  | 2.737993  |
| 205 | 1 | 0 | 8.553668  | 5.242714  | 4.361894  |
| 206 | 1 | 0 | 6.831567  | 5.407065  | 3.819126  |
| 207 | 1 | 0 | 7.669700  | 6.805660  | 4.620978  |
| 208 | 6 | 0 | 11.922704 | 7.392243  | 2.043451  |
| 209 | 8 | 0 | 10.745151 | 5.315320  | 1.737926  |
| 210 | 1 | 0 | 12.702481 | 6.943051  | 2.666628  |
| 211 | 1 | 0 | 12.294836 | 7.416723  | 1.014297  |
| 212 | 1 | 0 | 11.734508 | 8.415127  | 2.383453  |
| 213 | 8 | 0 | 6.819709  | -5.420434 | -0.344126 |

|     |   |   |           |           |           |
|-----|---|---|-----------|-----------|-----------|
| 214 | 6 | 0 | 7.123200  | -6.520016 | -0.834267 |
| 215 | 6 | 0 | 8.535330  | -7.126614 | -0.648512 |
| 216 | 7 | 0 | 6.290966  | -7.262188 | -1.601263 |
| 217 | 7 | 0 | 9.391239  | -6.654223 | -1.750220 |
| 218 | 1 | 0 | 8.476895  | -8.218957 | -0.735013 |
| 219 | 6 | 0 | 9.062786  | -6.746506 | 0.708161  |
| 220 | 1 | 0 | 6.680598  | -8.080427 | -2.061418 |
| 221 | 6 | 0 | 4.945605  | -6.801767 | -1.979132 |
| 222 | 6 | 0 | 9.384677  | -7.300056 | -2.948096 |
| 223 | 1 | 0 | 9.808091  | -5.725466 | -1.653737 |
| 224 | 1 | 0 | 9.162171  | -5.635569 | 0.802673  |
| 225 | 1 | 0 | 8.350528  | -7.103565 | 1.491444  |
| 226 | 1 | 0 | 10.061890 | -7.212084 | 0.888740  |
| 227 | 6 | 0 | 3.870072  | -7.647432 | -1.243655 |
| 228 | 6 | 0 | 4.678568  | -6.909862 | -3.460023 |
| 229 | 1 | 0 | 4.868981  | -5.754082 | -1.668892 |
| 230 | 6 | 0 | 10.279007 | -6.689682 | -4.017399 |
| 231 | 8 | 0 | 8.717252  | -8.323372 | -3.158367 |
| 232 | 8 | 0 | 3.894858  | -8.879011 | -1.254748 |
| 233 | 7 | 0 | 2.896792  | -6.902700 | -0.643425 |
| 234 | 1 | 0 | 4.739865  | -7.971374 | -3.806170 |
| 235 | 1 | 0 | 3.651230  | -6.525913 | -3.675207 |
| 236 | 1 | 0 | 5.413418  | -6.302199 | -4.042016 |
| 237 | 1 | 0 | 11.068378 | -7.408293 | -4.262781 |
| 238 | 1 | 0 | 9.685973  | -6.529147 | -4.923165 |
| 239 | 1 | 0 | 10.732575 | -5.746282 | -3.699583 |
| 240 | 1 | 0 | 3.003428  | -5.889540 | -0.574795 |
| 241 | 6 | 0 | 1.786175  | -7.539162 | 0.066279  |
| 242 | 6 | 0 | 0.477726  | -6.788659 | -0.269005 |
| 243 | 1 | 0 | 1.743879  | -8.574552 | -0.294829 |
| 244 | 6 | 0 | 1.928814  | -7.568160 | 1.570989  |
| 245 | 8 | 0 | 0.453022  | -5.552938 | -0.361229 |
| 246 | 7 | 0 | -0.618467 | -7.568702 | -0.418541 |
| 247 | 1 | 0 | 1.984066  | -6.535284 | 1.993358  |
| 248 | 1 | 0 | 1.048621  | -8.091065 | 2.018478  |
| 249 | 1 | 0 | 2.855917  | -8.119788 | 1.862634  |
| 250 | 1 | 0 | -0.557678 | -8.570885 | -0.276557 |
| 251 | 6 | 0 | -1.963655 | -7.018073 | -0.627669 |
| 252 | 6 | 0 | -2.933963 | -7.717090 | 0.353597  |
| 253 | 1 | 0 | -1.919064 | -5.945694 | -0.414433 |
| 254 | 6 | 0 | -2.492820 | -7.206872 | -2.029479 |
| 255 | 8 | 0 | -2.794469 | -8.905115 | 0.657269  |
| 256 | 7 | 0 | -3.948960 | -6.923143 | 0.785779  |

|     |   |   |            |           |           |
|-----|---|---|------------|-----------|-----------|
| 257 | 1 | 0 | -2.571309  | -8.288846 | -2.296308 |
| 258 | 1 | 0 | -3.508543  | -6.745836 | -2.101110 |
| 259 | 1 | 0 | -1.823907  | -6.705317 | -2.771037 |
| 260 | 1 | 0 | -3.905724  | -5.916664 | 0.618454  |
| 261 | 6 | 0 | -5.001335  | -7.433335 | 1.665101  |
| 262 | 6 | 0 | -6.294076  | -6.630692 | 1.393462  |
| 263 | 1 | 0 | -5.154863  | -8.489991 | 1.409002  |
| 264 | 6 | 0 | -4.689302  | -7.356592 | 3.142476  |
| 265 | 8 | 0 | -6.247354  | -5.475361 | 0.943986  |
| 266 | 7 | 0 | -7.446367  | -7.266236 | 1.697516  |
| 267 | 1 | 0 | -3.753893  | -7.927231 | 3.366127  |
| 268 | 1 | 0 | -4.547008  | -6.300382 | 3.476745  |
| 269 | 1 | 0 | -5.525767  | -7.807647 | 3.730155  |
| 270 | 1 | 0 | -7.428013  | -8.165832 | 2.168949  |
| 271 | 6 | 0 | -8.756007  | -6.600692 | 1.664462  |
| 272 | 6 | 0 | -9.457697  | -6.873023 | 3.018135  |
| 273 | 1 | 0 | -8.585505  | -5.527104 | 1.539218  |
| 274 | 6 | 0 | -9.658022  | -7.075867 | 0.551822  |
| 275 | 8 | 0 | -9.280623  | -7.939371 | 3.615436  |
| 276 | 7 | 0 | -10.265759 | -5.865704 | 3.429761  |
| 277 | 1 | 0 | -9.168758  | -6.933190 | -0.442760 |
| 278 | 1 | 0 | -9.915569  | -8.156828 | 0.667651  |
| 279 | 1 | 0 | -10.602395 | -6.477864 | 0.571372  |
| 280 | 1 | 0 | -10.236813 | -4.988813 | 2.910335  |
| 281 | 6 | 0 | -11.043030 | -5.943977 | 4.657119  |
| 282 | 1 | 0 | -12.097290 | -5.713696 | 4.461989  |
| 283 | 1 | 0 | -10.963550 | -6.959771 | 5.049734  |
| 284 | 1 | 0 | -10.664531 | -5.243247 | 5.412487  |
| 285 | 6 | 0 | -8.223982  | 0.925953  | -2.918717 |
| 286 | 1 | 0 | -7.261559  | 0.916810  | -3.485733 |
| 287 | 1 | 0 | -8.386222  | -0.088771 | -2.476848 |
| 288 | 1 | 0 | -9.056794  | 1.138859  | -3.632761 |

P Pl (Ac-AAAAAA-NHMe)<sub>5</sub>

|    |   |   |           |            |           |
|----|---|---|-----------|------------|-----------|
| 1  | 6 | 0 | 7.538333  | -9.749762  | -2.501972 |
| 2  | 6 | 0 | 6.198881  | -9.757476  | -1.781167 |
| 3  | 1 | 0 | 8.084344  | -10.658156 | -2.227165 |
| 4  | 1 | 0 | 7.350368  | -9.792875  | -3.580483 |
| 5  | 1 | 0 | 8.138664  | -8.867104  | -2.267994 |
| 6  | 8 | 0 | 5.424279  | -10.723932 | -1.884160 |
| 7  | 7 | 0 | 5.929126  | -8.649245  | -1.049059 |
| 8  | 1 | 0 | 6.629243  | -7.904630  | -1.001299 |
| 9  | 6 | 0 | 4.673574  | -8.478714  | -0.304844 |
| 10 | 6 | 0 | 3.905548  | -7.258493  | -0.872701 |
| 11 | 6 | 0 | 4.876938  | -8.238802  | 1.172507  |
| 12 | 1 | 0 | 4.084810  | -9.391896  | -0.442060 |
| 13 | 8 | 0 | 4.493199  | -6.180154  | -1.060675 |
| 14 | 7 | 0 | 2.590176  | -7.452796  | -1.106017 |
| 15 | 1 | 0 | 5.420030  | -9.095555  | 1.640189  |
| 16 | 1 | 0 | 5.463692  | -7.303180  | 1.353557  |
| 17 | 1 | 0 | 3.880258  | -8.136931  | 1.667655  |
| 18 | 1 | 0 | 2.185976  | -8.386613  | -0.974365 |
| 19 | 6 | 0 | 1.736695  | -6.384470  | -1.657353 |
| 20 | 6 | 0 | 0.398020  | -6.387811  | -0.886679 |
| 21 | 6 | 0 | 1.423203  | -6.550508  | -3.125349 |
| 22 | 1 | 0 | 2.268507  | -5.439822  | -1.505571 |
| 23 | 8 | 0 | -0.332093 | -7.388266  | -0.898162 |
| 24 | 7 | 0 | 0.101464  | -5.238294  | -0.236232 |
| 25 | 1 | 0 | 0.855587  | -7.496244  | -3.309939 |
| 26 | 1 | 0 | 0.798406  | -5.689610  | -3.467212 |
| 27 | 1 | 0 | 2.362145  | -6.571703  | -3.729886 |
| 28 | 1 | 0 | 0.783003  | -4.475753  | -0.229165 |
| 29 | 6 | 0 | -1.139673 | -5.096088  | 0.539887  |
| 30 | 6 | 0 | -1.939256 | -3.887198  | 0.001193  |
| 31 | 6 | 0 | -0.910375 | -4.871350  | 2.015172  |
| 32 | 1 | 0 | -1.706491 | -6.021714  | 0.396472  |
| 33 | 8 | 0 | -1.414584 | -2.764641  | -0.067057 |
| 34 | 7 | 0 | -3.218420 | -4.153262  | -0.344897 |
| 35 | 1 | 0 | -0.337121 | -5.720862  | 2.459593  |
| 36 | 1 | 0 | -0.342739 | -3.924813  | 2.193981  |
| 37 | 1 | 0 | -1.897329 | -4.797909  | 2.533910  |
| 38 | 1 | 0 | -3.538771 | -5.125623  | -0.345628 |
| 39 | 6 | 0 | -4.131711 | -3.109849  | -0.841835 |
| 40 | 6 | 0 | -5.335552 | -2.983787  | 0.126984  |
| 41 | 6 | 0 | -4.683984 | -3.405328  | -2.215231 |

|    |   |   |            |           |           |
|----|---|---|------------|-----------|-----------|
| 42 | 1 | 0 | -3.564311  | -2.173239 | -0.867122 |
| 43 | 8 | 0 | -6.024887  | -3.975825 | 0.406606  |
| 44 | 7 | 0 | -5.574515  | -1.737757 | 0.597294  |
| 45 | 1 | 0 | -3.858674  | -3.512745 | -2.960168 |
| 46 | 1 | 0 | -5.286480  | -4.348804 | -2.211332 |
| 47 | 1 | 0 | -5.345291  | -2.563209 | -2.534696 |
| 48 | 1 | 0 | -4.908664  | -0.987715 | 0.394622  |
| 49 | 6 | 0 | -6.670431  | -1.474415 | 1.542633  |
| 50 | 6 | 0 | -7.569477  | -0.339635 | 0.998450  |
| 51 | 6 | 0 | -6.199542  | -1.056964 | 2.915738  |
| 52 | 1 | 0 | -7.242976  | -2.403731 | 1.624421  |
| 53 | 8 | 0 | -7.089923  | 0.763441  | 0.691249  |
| 54 | 7 | 0 | -8.884995  | -0.639816 | 0.929568  |
| 55 | 1 | 0 | -5.553276  | -1.847465 | 3.368699  |
| 56 | 1 | 0 | -5.617280  | -0.103626 | 2.867793  |
| 57 | 1 | 0 | -7.085910  | -0.899687 | 3.577749  |
| 58 | 1 | 0 | -9.183812  | -1.601650 | 1.114100  |
| 59 | 6 | 0 | -9.895580  | 0.348089  | 0.512492  |
| 60 | 6 | 0 | -10.719067 | 0.802591  | 1.746966  |
| 61 | 6 | 0 | -10.858391 | -0.190228 | -0.515656 |
| 62 | 1 | 0 | -9.350442  | 1.201926  | 0.093525  |
| 63 | 8 | 0 | -11.392972 | -0.009063 | 2.403309  |
| 64 | 7 | 0 | -10.651880 | 2.114797  | 2.037848  |
| 65 | 1 | 0 | -11.564096 | 0.621473  | -0.818694 |
| 66 | 1 | 0 | -10.314886 | -0.547614 | -1.423732 |
| 67 | 1 | 0 | -11.456115 | -1.041004 | -0.098990 |
| 68 | 1 | 0 | -10.065356 | 2.738274  | 1.479791  |
| 69 | 6 | 0 | -11.379843 | 2.679810  | 3.165547  |
| 70 | 1 | 0 | -11.212484 | 3.759462  | 3.178794  |
| 71 | 1 | 0 | -12.454241 | 2.482208  | 3.077334  |
| 72 | 1 | 0 | -11.035666 | 2.251011  | 4.114321  |
| 73 | 8 | 0 | -9.150679  | 4.045767  | 0.610210  |
| 74 | 6 | 0 | -8.398173  | 4.805959  | -0.020111 |
| 75 | 7 | 0 | -8.467369  | 6.148887  | 0.051557  |
| 76 | 6 | 0 | -7.308614  | 4.245480  | -0.966710 |
| 77 | 1 | 0 | -7.789603  | 6.722208  | -0.454242 |
| 78 | 6 | 0 | -9.450190  | 6.819983  | 0.890739  |
| 79 | 6 | 0 | -7.998629  | 3.534044  | -2.103741 |
| 80 | 1 | 0 | -6.700253  | 5.065861  | -1.363676 |
| 81 | 7 | 0 | -6.402124  | 3.371759  | -0.203728 |
| 82 | 1 | 0 | -9.501122  | 7.871629  | 0.597394  |
| 83 | 1 | 0 | -10.434803 | 6.359276  | 0.764145  |
| 84 | 1 | 0 | -9.180768  | 6.760123  | 1.953153  |

|     |   |   |           |           |           |
|-----|---|---|-----------|-----------|-----------|
| 85  | 1 | 0 | -8.652152 | 4.258464  | -2.648505 |
| 86  | 1 | 0 | -7.253266 | 3.115311  | -2.822651 |
| 87  | 1 | 0 | -8.636450 | 2.697209  | -1.723995 |
| 88  | 1 | 0 | -6.746377 | 2.458225  | 0.106582  |
| 89  | 6 | 0 | -5.130664 | 3.725715  | 0.072394  |
| 90  | 8 | 0 | -4.609096 | 4.794517  | -0.287011 |
| 91  | 6 | 0 | -4.323602 | 2.699063  | 0.901106  |
| 92  | 6 | 0 | -4.084731 | 3.293503  | 2.267596  |
| 93  | 1 | 0 | -4.890024 | 1.767229  | 1.002958  |
| 94  | 7 | 0 | -3.085135 | 2.375852  | 0.176034  |
| 95  | 1 | 0 | -3.502535 | 2.588372  | 2.909163  |
| 96  | 1 | 0 | -3.522017 | 4.256924  | 2.194116  |
| 97  | 1 | 0 | -5.068549 | 3.492376  | 2.758921  |
| 98  | 1 | 0 | -2.404907 | 3.121307  | 0.011735  |
| 99  | 6 | 0 | -2.803392 | 1.121783  | -0.241503 |
| 100 | 8 | 0 | -3.539238 | 0.142016  | -0.055364 |
| 101 | 6 | 0 | -1.467207 | 0.966713  | -1.006505 |
| 102 | 1 | 0 | -0.904475 | 1.905486  | -0.983713 |
| 103 | 7 | 0 | -0.647197 | -0.045737 | -0.321720 |
| 104 | 1 | 0 | -1.009390 | -1.002401 | -0.257388 |
| 105 | 6 | 0 | 0.578468  | 0.234207  | 0.168076  |
| 106 | 8 | 0 | 1.124510  | 1.347649  | 0.100590  |
| 107 | 6 | 0 | 1.301920  | -0.948182 | 0.854285  |
| 108 | 6 | 0 | 1.406475  | -0.637439 | 2.327403  |
| 109 | 1 | 0 | 0.733847  | -1.874154 | 0.716747  |
| 110 | 7 | 0 | 2.604166  | -1.136771 | 0.195497  |
| 111 | 1 | 0 | 1.930731  | -1.461694 | 2.869125  |
| 112 | 1 | 0 | 0.379387  | -0.527762 | 2.753655  |
| 113 | 1 | 0 | 1.966501  | 0.315191  | 2.498014  |
| 114 | 1 | 0 | 3.274634  | -0.364548 | 0.210849  |
| 115 | 6 | 0 | 2.960483  | -2.308995 | -0.375995 |
| 116 | 8 | 0 | 2.252560  | -3.326808 | -0.382095 |
| 117 | 6 | 0 | 4.339656  | -2.297548 | -1.081274 |
| 118 | 6 | 0 | 4.087957  | -2.303871 | -2.570134 |
| 119 | 1 | 0 | 4.892955  | -1.391962 | -0.811509 |
| 120 | 7 | 0 | 5.132870  | -3.444316 | -0.616946 |
| 121 | 1 | 0 | 3.513630  | -3.212773 | -2.877107 |
| 122 | 1 | 0 | 3.495794  | -1.397592 | -2.846779 |
| 123 | 1 | 0 | 5.052229  | -2.285110 | -3.133720 |
| 124 | 6 | 0 | 6.323745  | -3.295072 | 0.002825  |
| 125 | 1 | 0 | 4.791314  | -4.389399 | -0.818188 |
| 126 | 6 | 0 | 6.990905  | -4.615658 | 0.451681  |
| 127 | 8 | 0 | 6.862447  | -2.200138 | 0.234612  |



|     |   |   |           |           |           |
|-----|---|---|-----------|-----------|-----------|
| 128 | 7 | 0 | 8.360831  | -4.667029 | -0.076209 |
| 129 | 6 | 0 | 6.905134  | -4.686312 | 1.957995  |
| 130 | 1 | 0 | 6.454110  | -5.468170 | 0.023423  |
| 131 | 1 | 0 | 8.998825  | -3.896314 | 0.133425  |
| 132 | 6 | 0 | 8.830367  | -5.750946 | -0.743923 |
| 133 | 1 | 0 | 7.361157  | -5.634315 | 2.333958  |
| 134 | 1 | 0 | 7.431204  | -3.822262 | 2.433088  |
| 135 | 1 | 0 | 5.831076  | -4.663585 | 2.265833  |
| 136 | 8 | 0 | 8.152465  | -6.767124 | -0.973648 |
| 137 | 6 | 0 | 10.267458 | -5.646814 | -1.230750 |
| 138 | 1 | 0 | 10.815263 | -6.528920 | -0.883951 |
| 139 | 1 | 0 | 10.262858 | -5.672000 | -2.326084 |
| 140 | 1 | 0 | 10.763559 | -4.737148 | -0.884248 |
| 141 | 1 | 0 | -4.189154 | 6.375684  | -1.016486 |
| 142 | 7 | 0 | -3.802966 | 7.241721  | -1.406881 |
| 143 | 6 | 0 | -2.596605 | 7.674716  | -0.990970 |
| 144 | 6 | 0 | -4.540499 | 7.916160  | -2.488097 |
| 145 | 6 | 0 | -1.936818 | 6.847275  | 0.137351  |
| 146 | 8 | 0 | -2.016826 | 8.671003  | -1.453307 |
| 147 | 6 | 0 | -5.819608 | 8.575433  | -1.917080 |
| 148 | 6 | 0 | -4.956065 | 6.979929  | -3.595700 |
| 149 | 1 | 0 | -3.870140 | 8.682301  | -2.892510 |
| 150 | 7 | 0 | -0.577993 | 6.481220  | -0.293429 |
| 151 | 6 | 0 | -1.967563 | 7.670140  | 1.400974  |
| 152 | 1 | 0 | -2.489175 | 5.914614  | 0.294369  |
| 153 | 8 | 0 | -6.676371 | 7.900307  | -1.324770 |
| 154 | 7 | 0 | -5.934044 | 9.901235  | -2.129138 |
| 155 | 1 | 0 | -5.490403 | 7.559852  | -4.387468 |
| 156 | 1 | 0 | -4.065731 | 6.485822  | -4.054981 |
| 157 | 1 | 0 | -5.644865 | 6.186703  | -3.211355 |
| 158 | 6 | 0 | -0.230564 | 5.199877  | -0.550589 |
| 159 | 1 | 0 | 0.111545  | 7.224040  | -0.416110 |
| 160 | 1 | 0 | -1.497672 | 7.112505  | 2.247289  |
| 161 | 1 | 0 | -1.422510 | 8.637136  | 1.265392  |
| 162 | 1 | 0 | -3.029466 | 7.893992  | 1.667864  |
| 163 | 1 | 0 | -5.174700 | 10.426097 | -2.566813 |
| 164 | 6 | 0 | -7.094980 | 10.651848 | -1.668799 |
| 165 | 6 | 0 | 1.196300  | 5.004826  | -1.111437 |
| 166 | 8 | 0 | -0.982413 | 4.229781  | -0.383752 |
| 167 | 1 | 0 | -7.072880 | 11.641579 | -2.130962 |
| 168 | 1 | 0 | -8.017939 | 10.137432 | -1.954271 |
| 169 | 1 | 0 | -7.092723 | 10.766018 | -0.577342 |
| 170 | 7 | 0 | 1.917366  | 4.042493  | -0.264593 |

|     |   |   |           |           |           |
|-----|---|---|-----------|-----------|-----------|
| 171 | 6 | 0 | 1.064539  | 4.567533  | -2.550600 |
| 172 | 1 | 0 | 1.754704  | 5.945327  | -1.068239 |
| 173 | 6 | 0 | 3.106344  | 4.350652  | 0.295196  |
| 174 | 1 | 0 | 1.538396  | 3.094688  | -0.164809 |
| 175 | 1 | 0 | 2.070749  | 4.412012  | -3.010016 |
| 176 | 1 | 0 | 0.485474  | 3.614025  | -2.628465 |
| 177 | 1 | 0 | 0.527416  | 5.358607  | -3.128642 |
| 178 | 6 | 0 | 3.730143  | 3.244280  | 1.181592  |
| 179 | 8 | 0 | 3.677002  | 5.445549  | 0.156123  |
| 180 | 7 | 0 | 5.105194  | 2.974983  | 0.729782  |
| 181 | 6 | 0 | 3.651940  | 3.712968  | 2.614480  |
| 182 | 1 | 0 | 3.167287  | 2.311239  | 1.070322  |
| 183 | 1 | 0 | 5.813142  | 3.700207  | 0.862621  |
| 184 | 6 | 0 | 5.480531  | 1.762999  | 0.258501  |
| 185 | 1 | 0 | 4.091471  | 2.952504  | 3.304574  |
| 186 | 1 | 0 | 2.580944  | 3.868930  | 2.892561  |
| 187 | 1 | 0 | 4.199947  | 4.679164  | 2.752005  |
| 188 | 6 | 0 | 6.949986  | 1.665963  | -0.214194 |
| 189 | 8 | 0 | 4.722927  | 0.786881  | 0.168237  |
| 190 | 7 | 0 | 7.609226  | 0.547989  | 0.479914  |
| 191 | 6 | 0 | 6.935971  | 1.523713  | -1.717355 |
| 192 | 1 | 0 | 7.499635  | 2.572475  | 0.058642  |
| 193 | 6 | 0 | 8.764955  | 0.723830  | 1.158182  |
| 194 | 1 | 0 | 7.236968  | -0.399083 | 0.355336  |
| 195 | 1 | 0 | 6.371439  | 0.609887  | -2.028381 |
| 196 | 1 | 0 | 6.440837  | 2.418345  | -2.167789 |
| 197 | 1 | 0 | 7.976574  | 1.453268  | -2.117261 |
| 198 | 6 | 0 | 9.317048  | -0.540824 | 1.864066  |
| 199 | 8 | 0 | 9.346875  | 1.815978  | 1.266927  |
| 200 | 7 | 0 | 10.740114 | -0.718589 | 1.540727  |
| 201 | 6 | 0 | 9.054847  | -0.374891 | 3.342497  |
| 202 | 1 | 0 | 8.793946  | -1.431653 | 1.499162  |
| 203 | 1 | 0 | 11.418373 | -0.042829 | 1.895364  |
| 204 | 6 | 0 | 11.197719 | -1.810369 | 0.874890  |
| 205 | 1 | 0 | 9.430261  | -1.258416 | 3.913440  |
| 206 | 1 | 0 | 7.954198  | -0.283524 | 3.512538  |
| 207 | 1 | 0 | 9.554194  | 0.545249  | 3.739051  |
| 208 | 6 | 0 | 12.698285 | -1.845098 | 0.629487  |
| 209 | 8 | 0 | 10.463587 | -2.724732 | 0.468322  |
| 210 | 1 | 0 | 13.080297 | -2.814556 | 0.964652  |
| 211 | 1 | 0 | 12.872199 | -1.778394 | -0.450306 |
| 212 | 1 | 0 | 13.230040 | -1.037494 | 1.137870  |
| 213 | 1 | 0 | -1.331845 | 10.123103 | -2.143193 |

|     |   |   |           |           |           |
|-----|---|---|-----------|-----------|-----------|
| 214 | 7 | 0 | -0.991542 | 11.027004 | -2.484281 |
| 215 | 6 | 0 | -0.128997 | 11.753259 | -1.737291 |
| 216 | 6 | 0 | -1.645103 | 11.610105 | -3.669850 |
| 217 | 6 | 0 | 0.421234  | 11.015500 | -0.492262 |
| 218 | 8 | 0 | 0.221091  | 12.912192 | -2.009481 |
| 219 | 6 | 0 | -2.916905 | 12.362131 | -3.199264 |
| 220 | 6 | 0 | -2.017803 | 10.586702 | -4.705680 |
| 221 | 1 | 0 | -0.938504 | 12.331185 | -4.100040 |
| 222 | 7 | 0 | 1.844128  | 10.694210 | -0.713894 |
| 223 | 6 | 0 | 0.184948  | 11.883746 | 0.716784  |
| 224 | 1 | 0 | -0.088022 | 10.054049 | -0.364689 |
| 225 | 8 | 0 | -4.039353 | 11.835385 | -3.180289 |
| 226 | 7 | 0 | -2.669710 | 13.627801 | -2.778297 |
| 227 | 1 | 0 | -2.498874 | 11.103688 | -5.572002 |
| 228 | 1 | 0 | -1.114076 | 10.039354 | -5.068408 |
| 229 | 1 | 0 | -2.746051 | 9.844004  | -4.294690 |
| 230 | 6 | 0 | 2.318898  | 9.420789  | -0.731944 |
| 231 | 1 | 0 | 2.488133  | 11.466736 | -0.830807 |
| 232 | 1 | 0 | 0.592447  | 11.403359 | 1.639312  |
| 233 | 1 | 0 | 0.662541  | 12.887186 | 0.592116  |
| 234 | 1 | 0 | -0.914685 | 12.032410 | 0.850529  |
| 235 | 1 | 0 | -1.690746 | 13.884513 | -2.671584 |
| 236 | 6 | 0 | -3.691155 | 14.467748 | -2.168548 |
| 237 | 6 | 0 | 3.834313  | 9.283689  | -1.008288 |
| 238 | 8 | 0 | 1.605871  | 8.425049  | -0.567747 |
| 239 | 1 | 0 | -3.495039 | 15.517253 | -2.409027 |
| 240 | 1 | 0 | -4.665544 | 14.182395 | -2.570418 |
| 241 | 1 | 0 | -3.716954 | 14.352694 | -1.076704 |
| 242 | 7 | 0 | 4.377532  | 8.250870  | -0.123317 |
| 243 | 6 | 0 | 4.012962  | 9.010998  | -2.483505 |
| 244 | 1 | 0 | 4.365436  | 10.211494 | -0.760580 |
| 245 | 6 | 0 | 5.558037  | 8.420861  | 0.531624  |
| 246 | 1 | 0 | 3.928233  | 7.332483  | -0.102547 |
| 247 | 1 | 0 | 5.098003  | 8.921447  | -2.735266 |
| 248 | 1 | 0 | 3.580080  | 9.856048  | -3.072589 |
| 249 | 1 | 0 | 3.499618  | 8.065642  | -2.786172 |
| 250 | 6 | 0 | 5.920991  | 7.251418  | 1.476151  |
| 251 | 8 | 0 | 6.277370  | 9.419795  | 0.441900  |
| 252 | 7 | 0 | 7.378798  | 7.070514  | 1.453618  |
| 253 | 6 | 0 | 5.362591  | 7.562003  | 2.844425  |
| 254 | 1 | 0 | 5.467803  | 6.321916  | 1.118616  |
| 255 | 6 | 0 | 7.960438  | 5.860872  | 1.275724  |
| 256 | 1 | 0 | 7.941355  | 7.913966  | 1.470760  |

|     |   |   |           |            |           |
|-----|---|---|-----------|------------|-----------|
| 257 | 1 | 0 | 5.594980  | 6.734946   | 3.559252  |
| 258 | 1 | 0 | 4.251767  | 7.662191   | 2.769922  |
| 259 | 1 | 0 | 5.781576  | 8.513744   | 3.252631  |
| 260 | 6 | 0 | 9.502009  | 5.873051   | 1.167266  |
| 261 | 8 | 0 | 7.324757  | 4.803118   | 1.179190  |
| 262 | 7 | 0 | 10.014794 | 4.633840   | 1.754338  |
| 263 | 6 | 0 | 9.869743  | 6.088928   | -0.282594 |
| 264 | 1 | 0 | 9.924519  | 6.698649   | 1.754063  |
| 265 | 1 | 0 | 9.558584  | 3.750648   | 1.514433  |
| 266 | 6 | 0 | 11.156984 | 4.610859   | 2.487261  |
| 267 | 1 | 0 | 9.464846  | 5.274504   | -0.931459 |
| 268 | 1 | 0 | 9.452128  | 7.064832   | -0.631648 |
| 269 | 1 | 0 | 10.980782 | 6.116051   | -0.401136 |
| 270 | 6 | 0 | 11.486372 | 3.228451   | 3.095831  |
| 271 | 8 | 0 | 11.875494 | 5.592845   | 2.704013  |
| 272 | 7 | 0 | 12.946794 | 3.113490   | 3.167007  |
| 273 | 6 | 0 | 10.785496 | 3.115720   | 4.428995  |
| 274 | 1 | 0 | 11.112618 | 2.432673   | 2.444303  |
| 275 | 6 | 0 | 13.611702 | 1.979058   | 2.836914  |
| 276 | 1 | 0 | 13.447381 | 3.977690   | 3.341521  |
| 277 | 1 | 0 | 11.023826 | 2.137767   | 4.914768  |
| 278 | 1 | 0 | 9.681032  | 3.167374   | 4.263740  |
| 279 | 1 | 0 | 11.084758 | 3.938978   | 5.121928  |
| 280 | 6 | 0 | 15.130335 | 2.063988   | 2.871695  |
| 281 | 8 | 0 | 13.039198 | 0.924116   | 2.522784  |
| 282 | 1 | 0 | 15.506268 | 1.311781   | 3.572421  |
| 283 | 1 | 0 | 15.517052 | 1.813428   | 1.878737  |
| 284 | 1 | 0 | 15.503890 | 3.049419   | 3.166181  |
| 285 | 8 | 0 | 1.779643  | -10.143993 | -0.632680 |
| 286 | 6 | 0 | 1.447419  | -11.262773 | -1.056291 |
| 287 | 6 | 0 | 2.359709  | -12.499669 | -0.872432 |
| 288 | 7 | 0 | 0.308197  | -11.504080 | -1.745873 |
| 289 | 7 | 0 | 3.262807  | -12.585064 | -2.032631 |
| 290 | 1 | 0 | 1.746201  | -13.409462 | -0.879504 |
| 291 | 6 | 0 | 3.092671  | -12.384371 | 0.436275  |
| 292 | 1 | 0 | 0.189973  | -12.428540 | -2.151261 |
| 293 | 6 | 0 | -0.633393 | -10.436556 | -2.116660 |
| 294 | 6 | 0 | 2.854001  | -13.203967 | -3.173879 |
| 295 | 1 | 0 | 4.095941  | -11.991823 | -2.025227 |
| 296 | 1 | 0 | 3.744352  | -11.474525 | 0.451872  |
| 297 | 1 | 0 | 2.349301  | -12.298038 | 1.265922  |
| 298 | 1 | 0 | 3.729626  | -13.284546 | 0.613810  |
| 299 | 6 | 0 | -1.955057 | -10.597018 | -1.317088 |

|     |   |   |            |            |           |
|-----|---|---|------------|------------|-----------|
| 300 | 6 | 0 | -0.983333  | -10.439675 | -3.584401 |
| 301 | 1 | 0 | -0.156133  | -9.485289  | -1.858169 |
| 302 | 6 | 0 | 3.861178   | -13.189582 | -4.314540 |
| 303 | 8 | 0 | 1.750790   | -13.759029 | -3.281595 |
| 304 | 8 | 0 | -2.540353  | -11.678511 | -1.242992 |
| 305 | 7 | 0 | -2.414446  | -9.436268  | -0.765540 |
| 306 | 1 | 0 | -1.479778  | -11.396639 | -3.880973 |
| 307 | 1 | 0 | -1.685647  | -9.595956  | -3.794315 |
| 308 | 1 | 0 | -0.068573  | -10.303690 | -4.211081 |
| 309 | 1 | 0 | 4.168099   | -14.220641 | -4.520922 |
| 310 | 1 | 0 | 3.369087   | -12.805931 | -5.213726 |
| 311 | 1 | 0 | 4.744912   | -12.585541 | -4.089282 |
| 312 | 1 | 0 | -1.813765  | -8.610484  | -0.748273 |
| 313 | 6 | 0 | -3.663393  | -9.408253  | -0.001899 |
| 314 | 6 | 0 | -4.388188  | -8.072646  | -0.277552 |
| 315 | 1 | 0 | -4.263729  | -10.255954 | -0.355968 |
| 316 | 6 | 0 | -3.497329  | -9.544541  | 1.494801  |
| 317 | 8 | 0 | -3.758750  | -7.009391  | -0.375747 |
| 318 | 7 | 0 | -5.736534  | -8.150256  | -0.368245 |
| 319 | 1 | 0 | -2.888332  | -8.707002  | 1.913976  |
| 320 | 1 | 0 | -4.501931  | -9.535948  | 1.983692  |
| 321 | 1 | 0 | -2.990255  | -10.509554 | 1.741308  |
| 322 | 1 | 0 | -6.211791  | -9.034120  | -0.221998 |
| 323 | 6 | 0 | -6.592019  | -6.965088  | -0.508157 |
| 324 | 6 | 0 | -7.759242  | -7.088885  | 0.498871  |
| 325 | 1 | 0 | -5.984118  | -6.086293  | -0.272649 |
| 326 | 6 | 0 | -7.174899  | -6.786417  | -1.889857 |
| 327 | 8 | 0 | -8.251022  | -8.185762  | 0.779130  |
| 328 | 7 | 0 | -8.200589  | -5.897828  | 0.982788  |
| 329 | 1 | 0 | -7.825689  | -7.648229  | -2.175566 |
| 330 | 1 | 0 | -7.788283  | -5.852158  | -1.908598 |
| 331 | 1 | 0 | -6.360062  | -6.689237  | -2.648559 |
| 332 | 1 | 0 | -7.638664  | -5.057613  | 0.835885  |
| 333 | 6 | 0 | -9.336420  | -5.820196  | 1.902478  |
| 334 | 6 | 0 | -10.031369 | -4.453781  | 1.707222  |
| 335 | 1 | 0 | -10.023660 | -6.634278  | 1.637468  |
| 336 | 6 | 0 | -8.983627  | -5.970511  | 3.364958  |
| 337 | 8 | 0 | -9.394725  | -3.459062  | 1.327955  |
| 338 | 7 | 0 | -11.350209 | -4.430271  | 1.999360  |
| 339 | 1 | 0 | -8.480452  | -6.953933  | 3.538486  |
| 340 | 1 | 0 | -8.298146  | -5.157347  | 3.706285  |
| 341 | 1 | 0 | -9.914091  | -5.936297  | 3.982714  |
| 342 | 1 | 0 | -11.797264 | -5.242964  | 2.413106  |

|     |   |   |            |           |           |
|-----|---|---|------------|-----------|-----------|
| 343 | 6 | 0 | -12.135065 | -3.188863 | 2.046283  |
| 344 | 6 | 0 | -12.877346 | -3.152927 | 3.405096  |
| 345 | 1 | 0 | -11.439075 | -2.347625 | 1.975618  |
| 346 | 6 | 0 | -13.152837 | -3.064272 | 0.939125  |
| 347 | 8 | 0 | -13.283457 | -4.195275 | 3.928490  |
| 348 | 7 | 0 | -13.041166 | -1.905166 | 3.908717  |
| 349 | 1 | 0 | -12.658195 | -3.121864 | -0.061318 |
| 350 | 1 | 0 | -13.924027 | -3.870363 | 0.999900  |
| 351 | 1 | 0 | -13.662322 | -2.072997 | 1.026190  |
| 352 | 1 | 0 | -12.554335 | -1.137466 | 3.446763  |
| 353 | 6 | 0 | -13.740270 | -1.658051 | 5.160348  |
| 354 | 1 | 0 | -14.495634 | -0.873855 | 5.030831  |
| 355 | 1 | 0 | -14.230939 | -2.583472 | 5.468867  |
| 356 | 1 | 0 | -13.044460 | -1.348618 | 5.951153  |
| 357 | 6 | 0 | -1.794347  | 0.608107  | -2.435686 |
| 358 | 1 | 0 | -0.860868  | 0.480329  | -3.035585 |
| 359 | 1 | 0 | -2.383977  | -0.340877 | -2.485961 |
| 360 | 1 | 0 | -2.401217  | 1.428461  | -2.890881 |

P PI (Ac-AAAAAA-NHMe)<sub>6</sub>

|    |   |   |           |           |           |
|----|---|---|-----------|-----------|-----------|
| 1  | 6 | 0 | -6.132644 | 11.513077 | 3.233434  |
| 2  | 6 | 0 | -6.957804 | 10.476943 | 2.485397  |
| 3  | 1 | 0 | -6.607280 | 12.491432 | 3.105093  |
| 4  | 1 | 0 | -6.160758 | 11.271520 | 4.301706  |
| 5  | 1 | 0 | -5.095493 | 11.552337 | 2.891484  |
| 6  | 8 | 0 | -8.173317 | 10.345801 | 2.709563  |
| 7  | 7 | 0 | -6.271012 | 9.728769  | 1.588037  |
| 8  | 1 | 0 | -5.271770 | 9.904629  | 1.457495  |
| 9  | 6 | 0 | -6.902715 | 8.663363  | 0.796037  |
| 10 | 6 | 0 | -6.254536 | 7.306363  | 1.169392  |
| 11 | 6 | 0 | -6.748583 | 8.848919  | -0.694399 |
| 12 | 1 | 0 | -7.968188 | 8.654925  | 1.049146  |
| 13 | 8 | 0 | -5.018343 | 7.191075  | 1.196458  |
| 14 | 7 | 0 | -7.115702 | 6.299872  | 1.430715  |
| 15 | 1 | 0 | -7.208433 | 9.812723  | -1.021967 |
| 16 | 1 | 0 | -5.670381 | 8.848950  | -0.991114 |
| 17 | 1 | 0 | -7.264939 | 8.010647  | -1.223195 |
| 18 | 1 | 0 | -8.124932 | 6.483284  | 1.420940  |
| 19 | 6 | 0 | -6.646718 | 4.962839  | 1.836595  |
| 20 | 6 | 0 | -7.441409 | 3.901484  | 1.043223  |
| 21 | 6 | 0 | -6.838115 | 4.672659  | 3.306704  |
| 22 | 1 | 0 | -5.581134 | 4.907704  | 1.593003  |
| 23 | 8 | 0 | -8.676501 | 3.850502  | 1.122151  |
| 24 | 7 | 0 | -6.691656 | 3.053775  | 0.300716  |
| 25 | 1 | 0 | -7.921562 | 4.697134  | 3.583105  |
| 26 | 1 | 0 | -6.436538 | 3.655389  | 3.535451  |
| 27 | 1 | 0 | -6.291831 | 5.420048  | 3.931557  |
| 28 | 1 | 0 | -5.680559 | 3.197832  | 0.245967  |
| 29 | 6 | 0 | -7.308468 | 1.988004  | -0.502986 |
| 30 | 6 | 0 | -6.707395 | 0.624405  | -0.089331 |
| 31 | 6 | 0 | -7.096309 | 2.147436  | -1.989433 |
| 32 | 1 | 0 | -8.381126 | 2.012594  | -0.284848 |
| 33 | 8 | 0 | -5.479718 | 0.443299  | -0.107252 |
| 34 | 7 | 0 | -7.612966 | -0.320263 | 0.248832  |
| 35 | 1 | 0 | -7.517890 | 3.118373  | -2.346319 |
| 36 | 1 | 0 | -6.008741 | 2.114249  | -2.246268 |
| 37 | 1 | 0 | -7.614426 | 1.315614  | -2.526284 |
| 38 | 1 | 0 | -8.598147 | -0.053897 | 0.326724  |
| 39 | 6 | 0 | -7.221342 | -1.689462 | 0.623365  |
| 40 | 6 | 0 | -7.821284 | -2.690092 | -0.398187 |
| 41 | 6 | 0 | -7.708774 | -2.095106 | 1.993294  |

|    |   |   |           |            |           |
|----|---|---|-----------|------------|-----------|
| 42 | 1 | 0 | -6.127130 | -1.730200  | 0.595836  |
| 43 | 8 | 0 | -9.036722 | -2.685429  | -0.643882 |
| 44 | 7 | 0 | -6.939029 | -3.555111  | -0.949330 |
| 45 | 1 | 0 | -7.312553 | -1.404029  | 2.776254  |
| 46 | 1 | 0 | -8.827312 | -2.084902  | 2.041138  |
| 47 | 1 | 0 | -7.353181 | -3.130224  | 2.218396  |
| 48 | 1 | 0 | -5.938589 | -3.435721  | -0.769254 |
| 49 | 6 | 0 | -7.363081 | -4.549833  | -1.946850 |
| 50 | 6 | 0 | -6.902781 | -5.959291  | -1.505994 |
| 51 | 6 | 0 | -6.801059 | -4.302699  | -3.326792 |
| 52 | 1 | 0 | -8.455928 | -4.504435  | -1.988600 |
| 53 | 8 | 0 | -5.708548 | -6.195074  | -1.263435 |
| 54 | 7 | 0 | -7.885319 | -6.885841  | -1.450344 |
| 55 | 1 | 0 | -7.112451 | -3.299262  | -3.706075 |
| 56 | 1 | 0 | -5.684013 | -4.351162  | -3.319740 |
| 57 | 1 | 0 | -7.186617 | -5.083202  | -4.027352 |
| 58 | 1 | 0 | -8.856269 | -6.585684  | -1.573442 |
| 59 | 6 | 0 | -7.616858 | -8.296837  | -1.122285 |
| 60 | 6 | 0 | -7.761247 | -9.166136  | -2.399784 |
| 61 | 6 | 0 | -8.554511 | -8.848760  | -0.077966 |
| 62 | 1 | 0 | -6.585837 | -8.345707  | -0.752901 |
| 63 | 8 | 0 | -8.836919 | -9.224900  | -3.018968 |
| 64 | 7 | 0 | -6.657704 | -9.843128  | -2.766865 |
| 65 | 1 | 0 | -8.265734 | -9.902841  | 0.154859  |
| 66 | 1 | 0 | -8.502542 | -8.248841  | 0.862828  |
| 67 | 1 | 0 | -9.612307 | -8.844885  | -0.446335 |
| 68 | 1 | 0 | -5.789726 | -9.738013  | -2.237747 |
| 69 | 6 | 0 | -6.650797 | -10.705994 | -3.939705 |
| 70 | 1 | 0 | -5.683202 | -11.211088 | -3.991722 |
| 71 | 1 | 0 | -7.446756 | -11.456432 | -3.876882 |
| 72 | 1 | 0 | -6.803689 | -10.128695 | -4.859696 |
| 73 | 8 | 0 | -4.182992 | -9.719541  | -1.409262 |
| 74 | 6 | 0 | -3.091434 | -9.557077  | -0.839752 |
| 75 | 7 | 0 | -2.021482 | -10.347002 | -1.047796 |
| 76 | 6 | 0 | -2.886151 | -8.408799  | 0.177797  |
| 77 | 1 | 0 | -1.135113 | -10.141109 | -0.582587 |
| 78 | 6 | 0 | -2.071734 | -11.469050 | -1.974561 |
| 79 | 6 | 0 | -3.810961 | -8.646771  | 1.345321  |
| 80 | 1 | 0 | -1.847984 | -8.399091  | 0.528386  |
| 81 | 7 | 0 | -3.120620 | -7.120152  | -0.494662 |
| 82 | 1 | 0 | -1.164449 | -12.065029 | -1.848733 |
| 83 | 1 | 0 | -2.947204 | -12.095046 | -1.772748 |
| 84 | 1 | 0 | -2.132026 | -11.127124 | -3.015612 |



|     |   |   |           |           |           |
|-----|---|---|-----------|-----------|-----------|
| 85  | 1 | 0 | -3.562512 | -9.628608 | 1.817364  |
| 86  | 1 | 0 | -3.698584 | -7.843047 | 2.112811  |
| 87  | 1 | 0 | -4.878105 | -8.674053 | 1.010985  |
| 88  | 1 | 0 | -4.077008 | -6.879811 | -0.771153 |
| 89  | 6 | 0 | -2.124482 | -6.239346 | -0.725470 |
| 90  | 8 | 0 | -0.942031 | -6.417862 | -0.390682 |
| 91  | 6 | 0 | -2.547226 | -4.951427 | -1.472244 |
| 92  | 6 | 0 | -1.941494 | -5.000302 | -2.853763 |
| 93  | 1 | 0 | -3.638453 | -4.904034 | -1.554342 |
| 94  | 7 | 0 | -2.120124 | -3.784158 | -0.685963 |
| 95  | 1 | 0 | -2.218535 | -4.090306 | -3.439355 |
| 96  | 1 | 0 | -0.826435 | -5.065372 | -2.801565 |
| 97  | 1 | 0 | -2.325976 | -5.900975 | -3.392045 |
| 98  | 1 | 0 | -1.118576 | -3.630657 | -0.544318 |
| 99  | 6 | 0 | -3.001598 | -2.889676 | -0.188196 |
| 100 | 8 | 0 | -4.229664 | -2.955995 | -0.344836 |
| 101 | 6 | 0 | -2.377217 | -1.738157 | 0.634887  |
| 102 | 6 | 0 | -2.819722 | -1.905229 | 2.068403  |
| 103 | 1 | 0 | -1.284560 | -1.782310 | 0.582006  |
| 104 | 7 | 0 | -2.786464 | -0.455872 | 0.039330  |
| 105 | 1 | 0 | -2.394751 | -1.096248 | 2.710687  |
| 106 | 1 | 0 | -2.459640 | -2.891025 | 2.451871  |
| 107 | 1 | 0 | -3.934757 | -1.877607 | 2.149647  |
| 108 | 1 | 0 | -3.785724 | -0.231159 | 0.003334  |
| 109 | 6 | 0 | -1.886625 | 0.456680  | -0.384756 |
| 110 | 8 | 0 | -0.655391 | 0.308397  | -0.324641 |
| 111 | 6 | 0 | -2.488085 | 1.747998  | -0.987656 |
| 112 | 6 | 0 | -2.208550 | 1.741049  | -2.470822 |
| 113 | 1 | 0 | -3.570152 | 1.776733  | -0.822285 |
| 114 | 7 | 0 | -1.909307 | 2.901225  | -0.280857 |
| 115 | 1 | 0 | -2.620316 | 2.659796  | -2.954637 |
| 116 | 1 | 0 | -2.694810 | 0.846960  | -2.932113 |
| 117 | 1 | 0 | -1.109881 | 1.693135  | -2.672530 |
| 118 | 1 | 0 | -0.894326 | 3.028728  | -0.302464 |
| 119 | 6 | 0 | -2.676163 | 3.816658  | 0.351665  |
| 120 | 8 | 0 | -3.916005 | 3.793448  | 0.373043  |
| 121 | 6 | 0 | -1.891733 | 4.916113  | 1.109051  |
| 122 | 6 | 0 | -2.042815 | 4.644072  | 2.586904  |
| 123 | 1 | 0 | -0.831180 | 4.875101  | 0.840519  |
| 124 | 7 | 0 | -2.391677 | 6.236953  | 0.700361  |
| 125 | 1 | 0 | -3.118165 | 4.669943  | 2.892307  |
| 126 | 1 | 0 | -1.630599 | 3.631776  | 2.818842  |
| 127 | 1 | 0 | -1.483529 | 5.402365  | 3.186854  |

|     |   |   |           |            |           |
|-----|---|---|-----------|------------|-----------|
| 128 | 6 | 0 | -1.577915 | 7.185682   | 0.188442  |
| 129 | 1 | 0 | -3.371807 | 6.468429   | 0.891205  |
| 130 | 6 | 0 | -2.282321 | 8.499956   | -0.222197 |
| 131 | 8 | 0 | -0.356558 | 7.043174   | 0.015185  |
| 132 | 7 | 0 | -1.587346 | 9.634964   | 0.400565  |
| 133 | 6 | 0 | -2.307254 | 8.550083   | -1.731731 |
| 134 | 1 | 0 | -3.310130 | 8.510069   | 0.155475  |
| 135 | 1 | 0 | -0.587878 | 9.757175   | 0.221976  |
| 136 | 6 | 0 | -2.246468 | 10.565065  | 1.135905  |
| 137 | 1 | 0 | -2.818977 | 9.477151   | -2.087138 |
| 138 | 1 | 0 | -1.271781 | 8.529454   | -2.152297 |
| 139 | 1 | 0 | -2.867007 | 7.664116   | -2.119544 |
| 140 | 8 | 0 | -3.469693 | 10.532903  | 1.354792  |
| 141 | 6 | 0 | -1.380544 | 11.675878  | 1.710267  |
| 142 | 1 | 0 | -1.805595 | 12.637886  | 1.405784  |
| 143 | 1 | 0 | -1.433389 | 11.624381  | 2.803342  |
| 144 | 1 | 0 | -0.339378 | 11.607566  | 1.385924  |
| 145 | 8 | 0 | 0.504325  | -9.936683  | 0.193563  |
| 146 | 6 | 0 | 1.583944  | -9.672654  | 0.747175  |
| 147 | 6 | 0 | 1.787921  | -8.340526  | 1.509190  |
| 148 | 7 | 0 | 2.644633  | -10.502082 | 0.738861  |
| 149 | 7 | 0 | 1.604386  | -7.213837  | 0.578927  |
| 150 | 6 | 0 | 0.825638  | -8.313123  | 2.670293  |
| 151 | 1 | 0 | 2.815902  | -8.277858  | 1.883441  |
| 152 | 1 | 0 | 3.517281  | -10.219188 | 1.188482  |
| 153 | 6 | 0 | 2.596424  | -11.792292 | 0.065179  |
| 154 | 1 | 0 | 0.658650  | -7.006194  | 0.243498  |
| 155 | 6 | 0 | 2.630414  | -6.425901  | 0.197958  |
| 156 | 1 | 0 | 1.034309  | -9.181651  | 3.341666  |
| 157 | 1 | 0 | 0.938982  | -7.371120  | 3.259728  |
| 158 | 1 | 0 | -0.232470 | -8.386221  | 2.314696  |
| 159 | 1 | 0 | 3.522885  | -12.330796 | 0.278963  |
| 160 | 1 | 0 | 1.745120  | -12.383846 | 0.419529  |
| 161 | 1 | 0 | 2.495723  | -11.671145 | -1.020384 |
| 162 | 6 | 0 | 2.263501  | -5.287415  | -0.782086 |
| 163 | 8 | 0 | 3.803163  | -6.569832  | 0.581693  |
| 164 | 7 | 0 | 2.677110  | -4.008284  | -0.182858 |
| 165 | 6 | 0 | 2.928180  | -5.579661  | -2.104676 |
| 166 | 1 | 0 | 1.178041  | -5.240384  | -0.920317 |
| 167 | 6 | 0 | 1.794169  | -3.019652  | 0.079428  |
| 168 | 1 | 0 | 3.669247  | -3.854699  | 0.011627  |
| 169 | 1 | 0 | 2.698098  | -4.778701  | -2.848508 |
| 170 | 1 | 0 | 4.037993  | -5.651937  | -1.989172 |

|     |   |   |          |           |           |
|-----|---|---|----------|-----------|-----------|
| 171 | 1 | 0 | 2.547651 | -6.553157 | -2.500042 |
| 172 | 6 | 0 | 2.390389 | -1.767941 | 0.766452  |
| 173 | 8 | 0 | 0.582793 | -3.081550 | -0.174867 |
| 174 | 7 | 0 | 2.017775 | -0.575004 | -0.008583 |
| 175 | 6 | 0 | 1.883049 | -1.743493 | 2.188444  |
| 176 | 1 | 0 | 3.483666 | -1.822133 | 0.771432  |
| 177 | 6 | 0 | 2.941972 | 0.256235  | -0.533138 |
| 178 | 1 | 0 | 1.022992 | -0.344264 | -0.099359 |
| 179 | 1 | 0 | 2.287482 | -0.858772 | 2.737395  |
| 180 | 1 | 0 | 0.765797 | -1.699877 | 2.215372  |
| 181 | 1 | 0 | 2.216057 | -2.671611 | 2.713945  |
| 182 | 6 | 0 | 2.375055 | 1.463362  | -1.316338 |
| 183 | 8 | 0 | 4.169548 | 0.098899  | -0.425787 |
| 184 | 7 | 0 | 2.905658 | 2.697361  | -0.714907 |
| 185 | 6 | 0 | 2.745166 | 1.290153  | -2.768979 |
| 186 | 1 | 0 | 1.284951 | 1.502097  | -1.218631 |
| 187 | 6 | 0 | 2.096451 | 3.655770  | -0.211945 |
| 188 | 1 | 0 | 3.918403 | 2.840779  | -0.706781 |
| 189 | 1 | 0 | 2.363808 | 2.144681  | -3.378923 |
| 190 | 1 | 0 | 3.854310 | 1.227261  | -2.895829 |
| 191 | 1 | 0 | 2.288878 | 0.345676  | -3.154204 |
| 192 | 6 | 0 | 2.822410 | 4.862869  | 0.428823  |
| 193 | 8 | 0 | 0.858119 | 3.599829  | -0.224175 |
| 194 | 7 | 0 | 2.327886 | 6.102849  | -0.188935 |
| 195 | 6 | 0 | 2.586390 | 4.798642  | 1.918781  |
| 196 | 1 | 0 | 3.897357 | 4.809285  | 0.227748  |
| 197 | 6 | 0 | 3.150235 | 6.962868  | -0.827420 |
| 198 | 1 | 0 | 1.337497 | 6.343180  | -0.079379 |
| 199 | 1 | 0 | 1.493570 | 4.836219  | 2.153799  |
| 200 | 1 | 0 | 3.003409 | 3.841338  | 2.316378  |
| 201 | 1 | 0 | 3.091717 | 5.649766  | 2.436368  |
| 202 | 6 | 0 | 2.460761 | 8.214608  | -1.420050 |
| 203 | 8 | 0 | 4.372967 | 6.791869  | -0.963825 |
| 204 | 7 | 0 | 3.123993 | 9.414908  | -0.890746 |
| 205 | 1 | 0 | 1.414891 | 8.259610  | -1.098128 |
| 206 | 6 | 0 | 2.518360 | 8.100931  | -2.924554 |
| 207 | 6 | 0 | 2.446520 | 10.379388 | -0.219409 |
| 208 | 1 | 0 | 4.121509 | 9.542598  | -1.074210 |
| 209 | 1 | 0 | 3.575595 | 8.034100  | -3.282061 |
| 210 | 1 | 0 | 1.975506 | 7.178025  | -3.244138 |
| 211 | 1 | 0 | 2.033329 | 8.983944  | -3.406751 |
| 212 | 6 | 0 | 3.289350 | 11.551227 | 0.261293  |
| 213 | 8 | 0 | 1.226867 | 10.333511 | 0.012228  |

|     |   |   |          |            |           |
|-----|---|---|----------|------------|-----------|
| 214 | 1 | 0 | 2.842759 | 12.476552  | -0.117189 |
| 215 | 1 | 0 | 3.240933 | 11.586074  | 1.355148  |
| 216 | 1 | 0 | 4.331094 | 11.481102  | -0.060992 |
| 217 | 1 | 0 | 5.331674 | -7.019138  | 1.404467  |
| 218 | 7 | 0 | 6.247820 | -7.140916  | 1.848667  |
| 219 | 6 | 0 | 7.293950 | -6.406009  | 1.421724  |
| 220 | 6 | 0 | 6.345776 | -8.022471  | 3.024136  |
| 221 | 6 | 0 | 7.028930 | -5.505913  | 0.191762  |
| 222 | 8 | 0 | 8.418318 | -6.422525  | 1.948266  |
| 223 | 6 | 0 | 6.161843 | -9.496252  | 2.588057  |
| 224 | 6 | 0 | 5.314685 | -7.719089  | 4.082967  |
| 225 | 1 | 0 | 7.347880 | -7.875873  | 3.441398  |
| 226 | 7 | 0 | 7.457313 | -4.137241  | 0.523356  |
| 227 | 6 | 0 | 7.759860 | -6.097020  | -0.987669 |
| 228 | 1 | 0 | 5.956139 | -5.465889  | -0.025279 |
| 229 | 8 | 0 | 5.128044 | -9.869278  | 2.010994  |
| 230 | 7 | 0 | 7.181000 | -10.321965 | 2.897343  |
| 231 | 1 | 0 | 5.461463 | -8.410006  | 4.948901  |
| 232 | 1 | 0 | 5.413467 | -6.667148  | 4.445443  |
| 233 | 1 | 0 | 4.278955 | -7.863358  | 3.685840  |
| 234 | 6 | 0 | 6.574184 | -3.120012  | 0.639111  |
| 235 | 1 | 0 | 8.449253 | -3.963645  | 0.691608  |
| 236 | 1 | 0 | 7.600896 | -5.476275  | -1.902781 |
| 237 | 1 | 0 | 8.858273 | -6.163478  | -0.788812 |
| 238 | 1 | 0 | 7.370188 | -7.126073  | -1.183120 |
| 239 | 1 | 0 | 8.032523 | -9.954059  | 3.325301  |
| 240 | 6 | 0 | 7.142662 | -11.741230 | 2.570548  |
| 241 | 6 | 0 | 7.172787 | -1.779236  | 1.121069  |
| 242 | 8 | 0 | 5.360884 | -3.225536  | 0.411639  |
| 243 | 1 | 0 | 7.938268 | -12.247284 | 3.122746  |
| 244 | 1 | 0 | 6.175701 | -12.169019 | 2.852738  |
| 245 | 1 | 0 | 7.289637 | -11.910862 | 1.496228  |
| 246 | 7 | 0 | 6.816257 | -0.718537  | 0.166438  |
| 247 | 6 | 0 | 6.662331 | -1.532311  | 2.520868  |
| 248 | 1 | 0 | 8.265888 | -1.834638  | 1.140239  |
| 249 | 6 | 0 | 7.757618 | 0.074022   | -0.388718 |
| 250 | 1 | 0 | 5.824108 | -0.522521  | -0.004864 |
| 251 | 1 | 0 | 7.066558 | -0.572719  | 2.925212  |
| 252 | 1 | 0 | 5.545216 | -1.484139  | 2.537683  |
| 253 | 1 | 0 | 6.992891 | -2.366572  | 3.186574  |
| 254 | 6 | 0 | 7.229613 | 1.141002   | -1.379849 |
| 255 | 8 | 0 | 8.975333 | -0.033053  | -0.166297 |
| 256 | 7 | 0 | 7.737608 | 2.464918   | -0.983359 |

|     |   |   |           |           |           |
|-----|---|---|-----------|-----------|-----------|
| 257 | 6 | 0 | 7.659677  | 0.725452  | -2.765902 |
| 258 | 1 | 0 | 6.136234  | 1.189173  | -1.334540 |
| 259 | 1 | 0 | 8.739992  | 2.646819  | -1.065936 |
| 260 | 6 | 0 | 6.909970  | 3.474877  | -0.627400 |
| 261 | 1 | 0 | 7.306529  | 1.462213  | -3.527618 |
| 262 | 1 | 0 | 7.217312  | -0.272598 | -3.004470 |
| 263 | 1 | 0 | 8.773925  | 0.646986  | -2.834740 |
| 264 | 6 | 0 | 7.614215  | 4.782042  | -0.194383 |
| 265 | 8 | 0 | 5.674390  | 3.388341  | -0.607533 |
| 266 | 7 | 0 | 7.084693  | 5.902142  | -0.988620 |
| 267 | 6 | 0 | 7.406056  | 4.939524  | 1.292897  |
| 268 | 1 | 0 | 8.686812  | 4.726381  | -0.405679 |
| 269 | 6 | 0 | 7.904766  | 6.733426  | -1.668776 |
| 270 | 1 | 0 | 6.082282  | 6.111632  | -0.939986 |
| 271 | 1 | 0 | 6.317122  | 4.989131  | 1.542321  |
| 272 | 1 | 0 | 7.853021  | 4.063154  | 1.822608  |
| 273 | 1 | 0 | 7.899631  | 5.870147  | 1.664475  |
| 274 | 6 | 0 | 7.191468  | 7.835689  | -2.492742 |
| 275 | 8 | 0 | 9.141878  | 6.621715  | -1.693002 |
| 276 | 7 | 0 | 7.807898  | 9.143831  | -2.229646 |
| 277 | 6 | 0 | 7.261107  | 7.419957  | -3.943580 |
| 278 | 1 | 0 | 6.142130  | 7.910980  | -2.186893 |
| 279 | 1 | 0 | 8.767582  | 9.310798  | -2.535785 |
| 280 | 6 | 0 | 7.107902  | 10.176798 | -1.692990 |
| 281 | 1 | 0 | 6.759074  | 8.174388  | -4.596530 |
| 282 | 1 | 0 | 6.741456  | 6.438800  | -4.070086 |
| 283 | 1 | 0 | 8.322925  | 7.306842  | -4.279543 |
| 284 | 6 | 0 | 7.891859  | 11.465152 | -1.496543 |
| 285 | 8 | 0 | 5.914580  | 10.099326 | -1.360260 |
| 286 | 1 | 0 | 7.321006  | 12.287278 | -1.939594 |
| 287 | 1 | 0 | 7.969491  | 11.660647 | -0.421151 |
| 288 | 1 | 0 | 8.891479  | 11.424593 | -1.935444 |
| 289 | 1 | 0 | 9.979231  | -6.557534 | 2.725239  |
| 290 | 7 | 0 | 10.895559 | -6.746944 | 3.141634  |
| 291 | 6 | 0 | 12.025052 | -6.510095 | 2.436070  |
| 292 | 6 | 0 | 10.932805 | -7.519705 | 4.396648  |
| 293 | 6 | 0 | 11.804041 | -5.740693 | 1.110120  |
| 294 | 8 | 0 | 13.158939 | -6.854828 | 2.803396  |
| 295 | 6 | 0 | 10.848904 | -9.026112 | 4.038383  |
| 296 | 6 | 0 | 9.823492  | -7.162649 | 5.345859  |
| 297 | 1 | 0 | 11.902457 | -7.315262 | 4.868144  |
| 298 | 7 | 0 | 12.286680 | -4.355338 | 1.270142  |
| 299 | 6 | 0 | 12.498286 | -6.491908 | 0.003483  |

|     |   |   |           |            |           |
|-----|---|---|-----------|------------|-----------|
| 300 | 1 | 0 | 10.733383 | -5.661693  | 0.891362  |
| 301 | 8 | 0 | 9.778769  | -9.651831  | 4.012431  |
| 302 | 7 | 0 | 12.049314 | -9.572276  | 3.720852  |
| 303 | 1 | 0 | 9.914325  | -7.791292  | 6.265494  |
| 304 | 1 | 0 | 9.880494  | -6.085766  | 5.637357  |
| 305 | 1 | 0 | 8.822047  | -7.357290  | 4.887538  |
| 306 | 6 | 0 | 11.474353 | -3.271599  | 1.152129  |
| 307 | 1 | 0 | 13.275491 | -4.218049  | 1.439073  |
| 308 | 1 | 0 | 12.390263 | -5.957452  | -0.971476 |
| 309 | 1 | 0 | 13.586778 | -6.621087  | 0.225160  |
| 310 | 1 | 0 | 12.037887 | -7.505597  | -0.094684 |
| 311 | 1 | 0 | 12.824698 | -8.923561  | 3.604367  |
| 312 | 6 | 0 | 12.186007 | -10.933913 | 3.222694  |
| 313 | 6 | 0 | 12.160319 | -1.904109  | 1.378597  |
| 314 | 8 | 0 | 10.265190 | -3.349672  | 0.909611  |
| 315 | 1 | 0 | 13.162410 | -11.332968 | 3.513819  |
| 316 | 1 | 0 | 11.399568 | -11.551033 | 3.662414  |
| 317 | 1 | 0 | 12.094776 | -10.981152 | 2.129281  |
| 318 | 7 | 0 | 11.668125 | -0.960993  | 0.371724  |
| 319 | 6 | 0 | 11.905421 | -1.491074  | 2.809370  |
| 320 | 1 | 0 | 13.244645 | -1.977153  | 1.226836  |
| 321 | 6 | 0 | 12.509130 | -0.114484  | -0.283221 |
| 322 | 1 | 0 | 10.658872 | -0.832748  | 0.267176  |
| 323 | 1 | 0 | 12.399572 | -0.512819  | 3.027333  |
| 324 | 1 | 0 | 12.325571 | -2.262946  | 3.499435  |
| 325 | 1 | 0 | 10.811299 | -1.388884  | 3.012741  |
| 326 | 6 | 0 | 11.808640 | 0.757131   | -1.351873 |
| 327 | 8 | 0 | 13.728261 | -0.051330  | -0.102219 |
| 328 | 7 | 0 | 12.452222 | 2.077835   | -1.373137 |
| 329 | 6 | 0 | 11.871528 | 0.023930   | -2.670496 |
| 330 | 1 | 0 | 10.757899 | 0.908140   | -1.086771 |
| 331 | 6 | 0 | 11.748198 | 3.233686   | -1.325714 |
| 332 | 1 | 0 | 13.464886 | 2.091583   | -1.324322 |
| 333 | 1 | 0 | 11.362688 | 0.614157   | -3.471534 |
| 334 | 1 | 0 | 11.345726 | -0.957054  | -2.567021 |
| 335 | 1 | 0 | 12.926601 | -0.166813  | -2.984317 |
| 336 | 6 | 0 | 12.594225 | 4.525354   | -1.250855 |
| 337 | 8 | 0 | 10.511413 | 3.282398   | -1.317518 |
| 338 | 7 | 0 | 11.878245 | 5.588331   | -1.958083 |
| 339 | 6 | 0 | 12.883949 | 4.814135   | 0.203977  |
| 340 | 1 | 0 | 13.551454 | 4.391165   | -1.770631 |
| 341 | 1 | 0 | 10.879010 | 5.711741   | -1.779765 |
| 342 | 6 | 0 | 12.528712 | 6.495416   | -2.730677 |

|     |   |   |            |           |           |
|-----|---|---|------------|-----------|-----------|
| 343 | 1 | 0 | 11.941625  | 4.961899  | 0.785753  |
| 344 | 1 | 0 | 13.447960  | 3.958160  | 0.648770  |
| 345 | 1 | 0 | 13.506878  | 5.737133  | 0.299954  |
| 346 | 6 | 0 | 11.593287  | 7.483148  | -3.465242 |
| 347 | 8 | 0 | 13.753786  | 6.537286  | -2.888690 |
| 348 | 7 | 0 | 12.307561  | 8.758048  | -3.590028 |
| 349 | 6 | 0 | 11.186513  | 6.864177  | -4.781514 |
| 350 | 1 | 0 | 10.689011  | 7.655844  | -2.873690 |
| 351 | 6 | 0 | 11.715052  | 9.957461  | -3.369086 |
| 352 | 1 | 0 | 13.312007  | 8.689009  | -3.709017 |
| 353 | 1 | 0 | 10.529296  | 7.562456  | -5.355640 |
| 354 | 1 | 0 | 10.612915  | 5.926130  | -4.579407 |
| 355 | 1 | 0 | 12.074989  | 6.614350  | -5.410547 |
| 356 | 6 | 0 | 12.627970  | 11.172604 | -3.438910 |
| 357 | 8 | 0 | 10.505547  | 10.081707 | -3.122363 |
| 358 | 1 | 0 | 12.239202  | 11.858858 | -4.197812 |
| 359 | 1 | 0 | 12.593548  | 11.690919 | -2.475299 |
| 360 | 1 | 0 | 13.666441  | 10.922710 | -3.676653 |
| 361 | 8 | 0 | -9.846284  | 7.118816  | 1.307172  |
| 362 | 6 | 0 | -10.911964 | 7.399515  | 1.878353  |
| 363 | 6 | 0 | -11.454990 | 8.848669  | 1.904912  |
| 364 | 7 | 0 | -11.664318 | 6.504574  | 2.560791  |
| 365 | 7 | 0 | -10.889244 | 9.530399  | 3.081366  |
| 366 | 1 | 0 | -12.543676 | 8.829365  | 2.040421  |
| 367 | 6 | 0 | -11.110535 | 9.529930  | 0.608538  |
| 368 | 1 | 0 | -12.450014 | 6.862341  | 3.096896  |
| 369 | 6 | 0 | -11.249354 | 5.105953  | 2.750483  |
| 370 | 6 | 0 | -11.486032 | 9.405021  | 4.298371  |
| 371 | 1 | 0 | -9.940723  | 9.904263  | 2.998580  |
| 372 | 1 | 0 | -10.001773 | 9.577526  | 0.463176  |
| 373 | 1 | 0 | -11.551024 | 8.949427  | -0.238440 |
| 374 | 1 | 0 | -11.520019 | 10.568847 | 0.586159  |
| 375 | 6 | 0 | -12.185452 | 4.160134  | 1.949790  |
| 376 | 6 | 0 | -11.285283 | 4.668787  | 4.194287  |
| 377 | 1 | 0 | -10.225351 | 5.022980  | 2.370706  |
| 378 | 6 | 0 | -10.778484 | 10.119647 | 5.440756  |
| 379 | 8 | 0 | -12.539186 | 8.774650  | 4.471607  |
| 380 | 8 | 0 | -13.412205 | 4.249952  | 2.020141  |
| 381 | 7 | 0 | -11.524819 | 3.211934  | 1.223820  |
| 382 | 1 | 0 | -12.319679 | 4.737107  | 4.613221  |
| 383 | 1 | 0 | -10.944325 | 3.606617  | 4.263042  |
| 384 | 1 | 0 | -10.605928 | 5.300007  | 4.817251  |
| 385 | 1 | 0 | -11.430811 | 10.919051 | 5.808716  |

|     |   |   |            |            |           |
|-----|---|---|------------|------------|-----------|
| 386 | 1 | 0 | -10.630055 | 9.410952   | 6.261438  |
| 387 | 1 | 0 | -9.816949  | 10.545331  | 5.139282  |
| 388 | 1 | 0 | -10.512148 | 3.276961   | 1.107683  |
| 389 | 6 | 0 | -12.255973 | 2.215700   | 0.439268  |
| 390 | 6 | 0 | -11.518443 | 0.861507   | 0.534469  |
| 391 | 1 | 0 | -13.256814 | 2.144002   | 0.883917  |
| 392 | 6 | 0 | -12.416309 | 2.553407   | -1.025799 |
| 393 | 8 | 0 | -10.280423 | 0.803952   | 0.542338  |
| 394 | 7 | 0 | -12.312836 | -0.234172  | 0.572825  |
| 395 | 1 | 0 | -11.424988 | 2.643791   | -1.532957 |
| 396 | 1 | 0 | -13.005034 | 1.749741   | -1.531629 |
| 397 | 1 | 0 | -12.963034 | 3.521208   | -1.142277 |
| 398 | 1 | 0 | -13.320867 | -0.143377  | 0.508787  |
| 399 | 6 | 0 | -11.776106 | -1.600539  | 0.549573  |
| 400 | 6 | 0 | -12.588121 | -2.426379  | -0.475253 |
| 401 | 1 | 0 | -10.729468 | -1.540709  | 0.236569  |
| 402 | 6 | 0 | -11.835373 | -2.308493  | 1.882395  |
| 403 | 8 | 0 | -13.793240 | -2.225625  | -0.651450 |
| 404 | 7 | 0 | -11.865261 | -3.394434  | -1.097907 |
| 405 | 1 | 0 | -12.887684 | -2.426249  | 2.238207  |
| 406 | 1 | 0 | -11.376440 | -3.322293  | 1.777161  |
| 407 | 1 | 0 | -11.260932 | -1.739270  | 2.653834  |
| 408 | 1 | 0 | -10.847165 | -3.391978  | -1.014030 |
| 409 | 6 | 0 | -12.479842 | -4.319029  | -2.050995 |
| 410 | 6 | 0 | -11.725383 | -5.666533  | -1.981873 |
| 411 | 1 | 0 | -13.524316 | -4.454477  | -1.741134 |
| 412 | 6 | 0 | -12.479665 | -3.846245  | -3.487044 |
| 413 | 8 | 0 | -10.529406 | -5.715941  | -1.657404 |
| 414 | 7 | 0 | -12.453407 | -6.753921  | -2.318670 |
| 415 | 1 | 0 | -13.022199 | -2.872160  | -3.570706 |
| 416 | 1 | 0 | -11.440264 | -3.705855  | -3.871317 |
| 417 | 1 | 0 | -13.000345 | -4.596490  | -4.130939 |
| 418 | 1 | 0 | -13.395973 | -6.647714  | -2.681336 |
| 419 | 6 | 0 | -11.863188 | -8.090224  | -2.474967 |
| 420 | 6 | 0 | -12.306697 | -8.645133  | -3.850895 |
| 421 | 1 | 0 | -10.774848 | -7.982029  | -2.446561 |
| 422 | 6 | 0 | -12.275492 | -9.072160  | -1.405656 |
| 423 | 8 | 0 | -13.419983 | -8.373274  | -4.311475 |
| 424 | 7 | 0 | -11.385043 | -9.443928  | -4.442834 |
| 425 | 1 | 0 | -12.004461 | -8.689373  | -0.391307 |
| 426 | 1 | 0 | -13.375747 | -9.264599  | -1.429309 |
| 427 | 1 | 0 | -11.738435 | -10.037890 | -1.575114 |
| 428 | 1 | 0 | -10.458037 | -9.495327  | -4.020935 |



|     |   |   |            |            |           |
|-----|---|---|------------|------------|-----------|
| 429 | 6 | 0 | -11.625161 | -10.091601 | -5.723017 |
| 430 | 1 | 0 | -11.416511 | -11.166213 | -5.657147 |
| 431 | 1 | 0 | -12.673451 | -9.944350  | -5.990813 |
| 432 | 1 | 0 | -10.995825 | -9.659386  | -6.511813 |

P Pl (Ac-AAAAAA-NHMe)<sub>7</sub>

|    |   |   |           |           |           |
|----|---|---|-----------|-----------|-----------|
| 1  | 6 | 0 | -3.865017 | 11.559250 | 2.379798  |
| 2  | 6 | 0 | -4.729189 | 10.487943 | 1.732425  |
| 3  | 1 | 0 | -4.319416 | 12.535699 | 2.183481  |
| 4  | 1 | 0 | -3.876981 | 11.402621 | 3.464219  |
| 5  | 1 | 0 | -2.834586 | 11.544103 | 2.016567  |
| 6  | 8 | 0 | -5.949429 | 10.428424 | 1.962270  |
| 7  | 7 | 0 | -4.071006 | 9.620077  | 0.923551  |
| 8  | 1 | 0 | -3.076000 | 9.768204  | 0.739377  |
| 9  | 6 | 0 | -4.763829 | 8.525756  | 0.228880  |
| 10 | 6 | 0 | -4.041944 | 7.192686  | 0.536260  |
| 11 | 6 | 0 | -4.808618 | 8.684292  | -1.272509 |
| 12 | 1 | 0 | -5.786413 | 8.499004  | 0.619659  |
| 13 | 8 | 0 | -2.824131 | 7.072164  | 0.325915  |
| 14 | 7 | 0 | -4.837129 | 6.206344  | 1.005133  |
| 15 | 1 | 0 | -5.332022 | 9.630032  | -1.553983 |
| 16 | 1 | 0 | -3.778465 | 8.702820  | -1.706066 |
| 17 | 1 | 0 | -5.366279 | 7.823623  | -1.716280 |
| 18 | 1 | 0 | -5.813738 | 6.417465  | 1.233656  |
| 19 | 6 | 0 | -4.316900 | 4.869391  | 1.326277  |
| 20 | 6 | 0 | -5.104593 | 3.804060  | 0.524189  |
| 21 | 6 | 0 | -4.434508 | 4.511621  | 2.789019  |
| 22 | 1 | 0 | -3.261769 | 4.854594  | 1.034984  |
| 23 | 8 | 0 | -6.344143 | 3.773224  | 0.555692  |
| 24 | 7 | 0 | -4.338866 | 2.921919  | -0.155535 |
| 25 | 1 | 0 | -5.503217 | 4.510370  | 3.117870  |
| 26 | 1 | 0 | -4.009431 | 3.491492  | 2.953715  |
| 27 | 1 | 0 | -3.868372 | 5.239249  | 3.419739  |
| 28 | 1 | 0 | -3.325422 | 3.060975  | -0.184713 |
| 29 | 6 | 0 | -4.917669 | 1.801219  | -0.912924 |
| 30 | 6 | 0 | -4.288802 | 0.485794  | -0.395597 |
| 31 | 6 | 0 | -4.668736 | 1.878796  | -2.399703 |
| 32 | 1 | 0 | -5.996412 | 1.806713  | -0.725226 |
| 33 | 8 | 0 | -3.055108 | 0.349027  | -0.369016 |
| 34 | 7 | 0 | -5.169454 | -0.460621 | -0.006629 |
| 35 | 1 | 0 | -5.101323 | 2.817139  | -2.824083 |
| 36 | 1 | 0 | -3.573977 | 1.856287  | -2.625625 |
| 37 | 1 | 0 | -5.153712 | 1.004984  | -2.899563 |
| 38 | 1 | 0 | -6.171455 | -0.246085 | -0.010759 |
| 39 | 6 | 0 | -4.734728 | -1.770814 | 0.504827  |
| 40 | 6 | 0 | -5.357923 | -2.879550 | -0.376168 |
| 41 | 6 | 0 | -5.153458 | -2.028859 | 1.931992  |

|    |   |   |           |            |           |
|----|---|---|-----------|------------|-----------|
| 42 | 1 | 0 | -3.642512 | -1.797558  | 0.433792  |
| 43 | 8 | 0 | -6.587271 | -2.946766  | -0.523434 |
| 44 | 7 | 0 | -4.475374 | -3.737717  | -0.932313 |
| 45 | 1 | 0 | -4.729577 | -1.253626  | 2.615301  |
| 46 | 1 | 0 | -6.267417 | -2.021609  | 2.030590  |
| 47 | 1 | 0 | -4.774760 | -3.030587  | 2.250825  |
| 48 | 1 | 0 | -3.473007 | -3.582921  | -0.795917 |
| 49 | 6 | 0 | -4.902941 | -4.855428  | -1.787547 |
| 50 | 6 | 0 | -4.445266 | -6.186406  | -1.143703 |
| 51 | 6 | 0 | -4.328247 | -4.799595  | -3.182268 |
| 52 | 1 | 0 | -5.996283 | -4.819531  | -1.842771 |
| 53 | 8 | 0 | -3.254166 | -6.370284  | -0.845512 |
| 54 | 7 | 0 | -5.423751 | -7.098897  | -0.962320 |
| 55 | 1 | 0 | -4.631763 | -3.856135  | -3.697529 |
| 56 | 1 | 0 | -3.211448 | -4.850129  | -3.158897 |
| 57 | 1 | 0 | -4.711785 | -5.667217  | -3.772931 |
| 58 | 1 | 0 | -6.389018 | -6.852493  | -1.199073 |
| 59 | 6 | 0 | -5.156884 | -8.429181  | -0.390609 |
| 60 | 6 | 0 | -5.396137 | -9.505736  | -1.476516 |
| 61 | 6 | 0 | -6.034429 | -8.755937  | 0.792064  |
| 62 | 1 | 0 | -4.105919 | -8.435516  | -0.080189 |
| 63 | 8 | 0 | -6.505754 | -9.630544  | -2.020130 |
| 64 | 7 | 0 | -4.335253 | -10.280417 | -1.770881 |
| 65 | 1 | 0 | -5.762190 | -9.766191  | 1.184248  |
| 66 | 1 | 0 | -5.896558 | -8.006900  | 1.609110  |
| 67 | 1 | 0 | -7.113576 | -8.768527  | 0.497949  |
| 68 | 1 | 0 | -3.433329 | -10.102803 | -1.323975 |
| 69 | 6 | 0 | -4.418108 | -11.337084 | -2.769038 |
| 70 | 1 | 0 | -3.517910 | -11.953077 | -2.700559 |
| 71 | 1 | 0 | -5.299216 | -11.962574 | -2.592326 |
| 72 | 1 | 0 | -4.491615 | -10.926246 | -3.784138 |
| 73 | 8 | 0 | -1.789189 | -9.898849  | -0.578380 |
| 74 | 6 | 0 | -0.668105 | -9.667261  | -0.096524 |
| 75 | 7 | 0 | 0.398551  | -10.467814 | -0.279762 |
| 76 | 6 | 0 | -0.416009 | -8.409696  | 0.770133  |
| 77 | 1 | 0 | 1.304656  | -10.212014 | 0.117736  |
| 78 | 6 | 0 | 0.310745  | -11.685161 | -1.073803 |
| 79 | 6 | 0 | -1.308788 | -8.488570  | 1.983130  |
| 80 | 1 | 0 | 0.632507  | -8.375684  | 1.086736  |
| 81 | 7 | 0 | -0.650893 | -7.207233  | -0.046791 |
| 82 | 1 | 0 | 1.243230  | -12.242979 | -0.958323 |
| 83 | 1 | 0 | -0.526094 | -12.306496 | -0.737072 |
| 84 | 1 | 0 | 0.159112  | -11.459681 | -2.136873 |

|     |   |   |           |           |           |
|-----|---|---|-----------|-----------|-----------|
| 85  | 1 | 0 | -1.060878 | -9.410861 | 2.563163  |
| 86  | 1 | 0 | -1.161906 | -7.600547 | 2.644498  |
| 87  | 1 | 0 | -2.385651 | -8.536875 | 1.684006  |
| 88  | 1 | 0 | -1.611819 | -6.987379 | -0.325616 |
| 89  | 6 | 0 | 0.347869  | -6.366351 | -0.389524 |
| 90  | 8 | 0 | 1.534195  | -6.515641 | -0.054302 |
| 91  | 6 | 0 | -0.077311 | -5.163733 | -1.265269 |
| 92  | 6 | 0 | 0.538622  | -5.344801 | -2.630951 |
| 93  | 1 | 0 | -1.168178 | -5.129840 | -1.358140 |
| 94  | 7 | 0 | 0.336803  | -3.922977 | -0.591890 |
| 95  | 1 | 0 | 0.262562  | -4.497746 | -3.304767 |
| 96  | 1 | 0 | 1.653476  | -5.399698 | -2.564570 |
| 97  | 1 | 0 | 0.161853  | -6.295667 | -3.081101 |
| 98  | 1 | 0 | 1.334989  | -3.757642 | -0.439574 |
| 99  | 6 | 0 | -0.551222 | -2.973630 | -0.224235 |
| 100 | 8 | 0 | -1.772179 | -3.042888 | -0.427455 |
| 101 | 6 | 0 | 0.053614  | -1.758448 | 0.517901  |
| 102 | 6 | 0 | -0.396753 | -1.831443 | 1.957302  |
| 103 | 1 | 0 | 1.146916  | -1.795474 | 0.476886  |
| 104 | 7 | 0 | -0.364094 | -0.525381 | -0.166461 |
| 105 | 1 | 0 | 0.019194  | -0.977701 | 2.545314  |
| 106 | 1 | 0 | -0.032125 | -2.786216 | 2.408912  |
| 107 | 1 | 0 | -1.512368 | -1.805770 | 2.030714  |
| 108 | 1 | 0 | -1.365015 | -0.311213 | -0.220219 |
| 109 | 6 | 0 | 0.530377  | 0.366880  | -0.641253 |
| 110 | 8 | 0 | 1.762521  | 0.235880  | -0.559103 |
| 111 | 6 | 0 | -0.077545 | 1.609104  | -1.333663 |
| 112 | 6 | 0 | 0.248087  | 1.526315  | -2.804903 |
| 113 | 1 | 0 | -1.164373 | 1.624556  | -1.200578 |
| 114 | 7 | 0 | 0.456130  | 2.812841  | -0.676854 |
| 115 | 1 | 0 | -0.165652 | 2.408241  | -3.351462 |
| 116 | 1 | 0 | -0.206325 | 0.598191  | -3.230009 |
| 117 | 1 | 0 | 1.353304  | 1.489835  | -2.970205 |
| 118 | 1 | 0 | 1.467760  | 2.967407  | -0.685433 |
| 119 | 6 | 0 | -0.348978 | 3.731785  | -0.100437 |
| 120 | 8 | 0 | -1.587326 | 3.666028  | -0.091069 |
| 121 | 6 | 0 | 0.380730  | 4.901210  | 0.601573  |
| 122 | 6 | 0 | 0.167576  | 4.743692  | 2.088353  |
| 123 | 1 | 0 | 1.452838  | 4.865431  | 0.382718  |
| 124 | 7 | 0 | -0.127294 | 6.173780  | 0.066290  |
| 125 | 1 | 0 | -0.921556 | 4.762756  | 2.341756  |
| 126 | 1 | 0 | 0.593068  | 3.765086  | 2.419532  |
| 127 | 1 | 0 | 0.678952  | 5.562815  | 2.649760  |

|     |   |   |           |            |           |
|-----|---|---|-----------|------------|-----------|
| 128 | 6 | 0 | 0.695157  | 7.104374   | -0.465208 |
| 129 | 1 | 0 | -1.123248 | 6.388938   | 0.177181  |
| 130 | 6 | 0 | -0.006463 | 8.378763   | -0.991410 |
| 131 | 8 | 0 | 1.926110  | 6.975811   | -0.564412 |
| 132 | 7 | 0 | 0.641420  | 9.558718   | -0.402017 |
| 133 | 6 | 0 | 0.052362  | 8.342101   | -2.499975 |
| 134 | 1 | 0 | -1.053200 | 8.394830   | -0.669605 |
| 135 | 1 | 0 | 1.639905  | 9.703916   | -0.568227 |
| 136 | 6 | 0 | -0.049436 | 10.474905  | 0.320961  |
| 137 | 1 | 0 | -0.444729 | 9.241851   | -2.936837 |
| 138 | 1 | 0 | 1.110078  | 8.308104   | -2.860421 |
| 139 | 1 | 0 | -0.478330 | 7.429377   | -2.865920 |
| 140 | 8 | 0 | -1.268504 | 10.397738  | 0.550006  |
| 141 | 6 | 0 | 0.775126  | 11.633159  | 0.862035  |
| 142 | 1 | 0 | 0.323615  | 12.569303  | 0.517146  |
| 143 | 1 | 0 | 0.712166  | 11.621219  | 1.955602  |
| 144 | 1 | 0 | 1.821280  | 11.586936  | 0.549870  |
| 145 | 8 | 0 | 2.976356  | -9.938011  | 0.808526  |
| 146 | 6 | 0 | 4.064248  | -9.634559  | 1.324620  |
| 147 | 6 | 0 | 4.278130  | -8.252752  | 1.988738  |
| 148 | 7 | 0 | 5.127683  | -10.460215 | 1.354334  |
| 149 | 7 | 0 | 4.090174  | -7.195770  | 0.980444  |
| 150 | 6 | 0 | 3.326188  | -8.139145  | 3.153124  |
| 151 | 1 | 0 | 5.309328  | -8.166660  | 2.349065  |
| 152 | 1 | 0 | 6.004070  | -10.147291 | 1.775803  |
| 153 | 6 | 0 | 5.072561  | -11.793222 | 0.770551  |
| 154 | 1 | 0 | 3.144815  | -7.024686  | 0.624087  |
| 155 | 6 | 0 | 5.109190  | -6.419907  | 0.557642  |
| 156 | 1 | 0 | 3.539001  | -8.957685  | 3.883425  |
| 157 | 1 | 0 | 3.446933  | -7.157520  | 3.672225  |
| 158 | 1 | 0 | 2.264814  | -8.234755  | 2.813037  |
| 159 | 1 | 0 | 6.003269  | -12.315000 | 1.006272  |
| 160 | 1 | 0 | 4.227973  | -12.360561 | 1.176814  |
| 161 | 1 | 0 | 4.955523  | -11.745764 | -0.319050 |
| 162 | 6 | 0 | 4.739236  | -5.357670  | -0.503517 |
| 163 | 8 | 0 | 6.279315  | -6.518977  | 0.962800  |
| 164 | 7 | 0 | 5.125549  | -4.033451  | 0.010730  |
| 165 | 6 | 0 | 5.426848  | -5.730467  | -1.793777 |
| 166 | 1 | 0 | 3.655405  | -5.336781  | -0.659610 |
| 167 | 6 | 0 | 4.225537  | -3.040058  | 0.181442  |
| 168 | 1 | 0 | 6.111643  | -3.852589  | 0.212840  |
| 169 | 1 | 0 | 5.196335  | -4.986225  | -2.594236 |
| 170 | 1 | 0 | 6.535776  | -5.778132  | -1.658709 |

|     |   |   |          |           |           |
|-----|---|---|----------|-----------|-----------|
| 171 | 1 | 0 | 5.065653 | -6.734473 | -2.125932 |
| 172 | 6 | 0 | 4.790752 | -1.733984 | 0.788461  |
| 173 | 8 | 0 | 3.020362 | -3.138380 | -0.091287 |
| 174 | 7 | 0 | 4.423818 | -0.602807 | -0.077190 |
| 175 | 6 | 0 | 4.250020 | -1.615946 | 2.193650  |
| 176 | 1 | 0 | 5.884098 | -1.773316 | 0.822407  |
| 177 | 6 | 0 | 5.350526 | 0.220410  | -0.610746 |
| 178 | 1 | 0 | 3.429301 | -0.396114 | -0.216448 |
| 179 | 1 | 0 | 4.630642 | -0.689021 | 2.687181  |
| 180 | 1 | 0 | 3.131990 | -1.586233 | 2.192457  |
| 181 | 1 | 0 | 4.582146 | -2.499686 | 2.791267  |
| 182 | 6 | 0 | 4.790982 | 1.369464  | -1.482243 |
| 183 | 8 | 0 | 6.575682 | 0.097281  | -0.447157 |
| 184 | 7 | 0 | 5.280831 | 2.646196  | -0.937379 |
| 185 | 6 | 0 | 5.214438 | 1.117948  | -2.908720 |
| 186 | 1 | 0 | 3.697696 | 1.393604  | -1.424210 |
| 187 | 6 | 0 | 4.440782 | 3.623290  | -0.529983 |
| 188 | 1 | 0 | 6.290462 | 2.807394  | -0.903858 |
| 189 | 1 | 0 | 4.840425 | 1.927843  | -3.580932 |
| 190 | 1 | 0 | 6.328227 | 1.068442  | -2.994073 |
| 191 | 1 | 0 | 4.787508 | 0.144150  | -3.252353 |
| 192 | 6 | 0 | 5.126406 | 4.878401  | 0.061764  |
| 193 | 8 | 0 | 3.204692 | 3.549944  | -0.587578 |
| 194 | 7 | 0 | 4.631228 | 6.072123  | -0.640626 |
| 195 | 6 | 0 | 4.845473 | 4.894388  | 1.545213  |
| 196 | 1 | 0 | 6.207860 | 4.833061  | -0.103231 |
| 197 | 6 | 0 | 5.458327 | 6.905451  | -1.307844 |
| 198 | 1 | 0 | 3.634659 | 6.301615  | -0.573519 |
| 199 | 1 | 0 | 3.745512 | 4.926140  | 1.744923  |
| 200 | 1 | 0 | 5.265195 | 3.968601  | 2.009087  |
| 201 | 1 | 0 | 5.321015 | 5.782200  | 2.028256  |
| 202 | 6 | 0 | 4.766174 | 8.105813  | -1.996249 |
| 203 | 8 | 0 | 6.686907 | 6.746995  | -1.399535 |
| 204 | 7 | 0 | 5.392105 | 9.348725  | -1.523026 |
| 205 | 1 | 0 | 3.710302 | 8.150762  | -1.708613 |
| 206 | 6 | 0 | 4.871060 | 7.900957  | -3.488569 |
| 207 | 6 | 0 | 4.676038 | 10.345228 | -0.944798 |
| 208 | 1 | 0 | 6.393061 | 9.482319  | -1.682110 |
| 209 | 1 | 0 | 5.939614 | 7.832655  | -3.810374 |
| 210 | 1 | 0 | 4.354286 | 6.949878  | -3.765996 |
| 211 | 1 | 0 | 4.385448 | 8.743170  | -4.038425 |
| 212 | 6 | 0 | 5.484417 | 11.558885 | -0.510979 |
| 213 | 8 | 0 | 3.448962 | 10.295855 | -0.757109 |

|     |   |   |           |            |           |
|-----|---|---|-----------|------------|-----------|
| 214 | 1 | 0 | 5.033460  | 12.451938  | -0.955752 |
| 215 | 1 | 0 | 5.403900  | 11.656746  | 0.577213  |
| 216 | 1 | 0 | 6.536344  | 11.489072  | -0.798523 |
| 217 | 1 | 0 | 7.803048  | -6.913982  | 1.824592  |
| 218 | 7 | 0 | 8.716773  | -6.996828  | 2.282443  |
| 219 | 6 | 0 | 9.751379  | -6.258227  | 1.833869  |
| 220 | 6 | 0 | 8.819487  | -7.819832  | 3.499446  |
| 221 | 6 | 0 | 9.484527  | -5.429445  | 0.555079  |
| 222 | 8 | 0 | 10.867846 | -6.221558  | 2.375654  |
| 223 | 6 | 0 | 8.641473  | -9.313321  | 3.134171  |
| 224 | 6 | 0 | 7.788211  | -7.470915  | 4.544049  |
| 225 | 1 | 0 | 9.821326  | -7.649177  | 3.908046  |
| 226 | 7 | 0 | 9.889707  | -4.038401  | 0.814079  |
| 227 | 6 | 0 | 10.234667 | -6.073921  | -0.583899 |
| 228 | 1 | 0 | 8.413458  | -5.418034  | 0.326657  |
| 229 | 8 | 0 | 7.609010  | -9.718000  | 2.576202  |
| 230 | 7 | 0 | 9.664348  | -10.119065 | 3.481588  |
| 231 | 1 | 0 | 7.939593  | -8.118554  | 5.442045  |
| 232 | 1 | 0 | 7.882329  | -6.402278  | 4.855297  |
| 233 | 1 | 0 | 6.752711  | -7.639243  | 4.155916  |
| 234 | 6 | 0 | 8.993365  | -3.026736  | 0.851275  |
| 235 | 1 | 0 | 10.876419 | -3.841799  | 0.987827  |
| 236 | 1 | 0 | 10.074558 | -5.507364  | -1.533321 |
| 237 | 1 | 0 | 11.332154 | -6.112344  | -0.373005 |
| 238 | 1 | 0 | 9.862031  | -7.118055  | -0.725014 |
| 239 | 1 | 0 | 10.513055 | -9.727221  | 3.893613  |
| 240 | 6 | 0 | 9.631406  | -11.552179 | 3.221579  |
| 241 | 6 | 0 | 9.568728  | -1.653515  | 1.265726  |
| 242 | 8 | 0 | 7.786050  | -3.159667  | 0.606321  |
| 243 | 1 | 0 | 10.440901 | -12.026380 | 3.781759  |
| 244 | 1 | 0 | 8.673460  | -11.974506 | 3.540881  |
| 245 | 1 | 0 | 9.760193  | -11.769841 | 2.153671  |
| 246 | 7 | 0 | 9.216102  | -0.652469  | 0.247478  |
| 247 | 6 | 0 | 9.033788  | -1.334632  | 2.641660  |
| 248 | 1 | 0 | 10.661912 | -1.694926  | 1.304783  |
| 249 | 6 | 0 | 10.156182 | 0.126483   | -0.328931 |
| 250 | 1 | 0 | 8.225026  | -0.481805  | 0.045869  |
| 251 | 1 | 0 | 9.421264  | -0.349214  | 2.997390  |
| 252 | 1 | 0 | 7.916140  | -1.298659  | 2.639131  |
| 253 | 1 | 0 | 9.363043  | -2.126326  | 3.358078  |
| 254 | 6 | 0 | 9.632791  | 1.126976   | -1.389428 |
| 255 | 8 | 0 | 11.370092 | 0.054069   | -0.074255 |
| 256 | 7 | 0 | 10.114825 | 2.478981   | -1.061888 |

|     |   |   |           |           |           |
|-----|---|---|-----------|-----------|-----------|
| 257 | 6 | 0 | 10.094312 | 0.638000  | -2.741104 |
| 258 | 1 | 0 | 8.538239  | 1.161188  | -1.366874 |
| 259 | 1 | 0 | 11.116271 | 2.670014  | -1.134775 |
| 260 | 6 | 0 | 9.266375  | 3.497561  | -0.789030 |
| 261 | 1 | 0 | 9.745298  | 1.324014  | -3.550621 |
| 262 | 1 | 0 | 9.670176  | -0.378627 | -2.928935 |
| 263 | 1 | 0 | 11.210645 | 0.572153  | -2.785492 |
| 264 | 6 | 0 | 9.943310  | 4.839018  | -0.422637 |
| 265 | 8 | 0 | 8.031809  | 3.395220  | -0.792287 |
| 266 | 7 | 0 | 9.414854  | 5.900615  | -1.294174 |
| 267 | 6 | 0 | 9.702648  | 5.083720  | 1.047830  |
| 268 | 1 | 0 | 11.020706 | 4.786919  | -0.608918 |
| 269 | 6 | 0 | 10.237460 | 6.700477  | -2.008337 |
| 270 | 1 | 0 | 8.408542  | 6.095620  | -1.281433 |
| 271 | 1 | 0 | 8.608330  | 5.132020  | 1.272571  |
| 272 | 1 | 0 | 10.150877 | 4.248100  | 1.638801  |
| 273 | 1 | 0 | 10.175636 | 6.042597  | 1.371239  |
| 274 | 6 | 0 | 9.526996  | 7.740999  | -2.911109 |
| 275 | 8 | 0 | 11.476166 | 6.605029  | -2.001655 |
| 276 | 7 | 0 | 10.116114 | 9.072420  | -2.708706 |
| 277 | 6 | 0 | 9.639199  | 7.244463  | -4.333610 |
| 278 | 1 | 0 | 8.469385  | 7.815648  | -2.635074 |
| 279 | 1 | 0 | 11.081370 | 9.237163  | -2.998045 |
| 280 | 6 | 0 | 9.385035  | 10.124274 | -2.256653 |
| 281 | 1 | 0 | 9.141232  | 7.951445  | -5.040536 |
| 282 | 1 | 0 | 9.138836  | 6.248684  | -4.415828 |
| 283 | 1 | 0 | 10.710693 | 7.131066  | -4.637192 |
| 284 | 6 | 0 | 10.143390 | 11.435212 | -2.117378 |
| 285 | 8 | 0 | 8.183754  | 10.047151 | -1.953892 |
| 286 | 1 | 0 | 9.574888  | 12.218524 | -2.628573 |
| 287 | 1 | 0 | 10.183861 | 11.698533 | -1.054503 |
| 288 | 1 | 0 | 11.156898 | 11.384069 | -2.521972 |
| 289 | 1 | 0 | 12.428431 | -6.303326 | 3.160471  |
| 290 | 7 | 0 | 13.344150 | -6.466994 | 3.588828  |
| 291 | 6 | 0 | 14.474834 | -6.252814 | 2.877919  |
| 292 | 6 | 0 | 13.380683 | -7.188737 | 4.874092  |
| 293 | 6 | 0 | 14.253228 | -5.545251 | 1.518148  |
| 294 | 8 | 0 | 15.609595 | -6.573242 | 3.264096  |
| 295 | 6 | 0 | 13.310216 | -8.708644 | 4.574655  |
| 296 | 6 | 0 | 12.263452 | -6.802818 | 5.802431  |
| 297 | 1 | 0 | 14.346203 | -6.958324 | 5.342021  |
| 298 | 7 | 0 | 14.714817 | -4.147194 | 1.619267  |
| 299 | 6 | 0 | 14.965638 | -6.334811 | 0.450383  |



|     |   |   |           |            |           |
|-----|---|---|-----------|------------|-----------|
| 300 | 1 | 0 | 13.183154 | -5.491173  | 1.289122  |
| 301 | 8 | 0 | 12.245515 | -9.344030  | 4.570026  |
| 302 | 7 | 0 | 14.515747 | -9.256527  | 4.280611  |
| 303 | 1 | 0 | 12.352179 | -7.395733  | 6.745688  |
| 304 | 1 | 0 | 12.312542 | -5.715355  | 6.053285  |
| 305 | 1 | 0 | 11.265954 | -7.020420  | 5.345764  |
| 306 | 6 | 0 | 13.888928 | -3.082034  | 1.440777  |
| 307 | 1 | 0 | 15.700412 | -3.987550  | 1.787350  |
| 308 | 1 | 0 | 14.857037 | -5.845676  | -0.548017 |
| 309 | 1 | 0 | 16.054233 | -6.438564  | 0.684590  |
| 310 | 1 | 0 | 14.520197 | -7.358332  | 0.394361  |
| 311 | 1 | 0 | 15.285723 | -8.606198  | 4.139160  |
| 312 | 6 | 0 | 14.663140 | -10.634853 | 3.833873  |
| 313 | 6 | 0 | 14.553786 | -1.695468  | 1.606807  |
| 314 | 8 | 0 | 12.683520 | -3.188976  | 1.190672  |
| 315 | 1 | 0 | 15.651220 | -11.007091 | 4.120752  |
| 316 | 1 | 0 | 13.895494 | -11.246278 | 4.313206  |
| 317 | 1 | 0 | 14.551115 | -10.727166 | 2.745260  |
| 318 | 7 | 0 | 14.064363 | -0.812013  | 0.545902  |
| 319 | 6 | 0 | 14.271904 | -1.213683  | 3.010693  |
| 320 | 1 | 0 | 15.641091 | -1.761019  | 1.474187  |
| 321 | 6 | 0 | 14.904706 | 0.005918   | -0.145270 |
| 322 | 1 | 0 | 13.055194 | -0.700915  | 0.422531  |
| 323 | 1 | 0 | 14.749846 | -0.218871  | 3.185574  |
| 324 | 1 | 0 | 14.691557 | -1.943620  | 3.745260  |
| 325 | 1 | 0 | 13.173564 | -1.116443  | 3.192682  |
| 326 | 6 | 0 | 14.208393 | 0.809748   | -1.268360 |
| 327 | 8 | 0 | 16.120984 | 0.091570   | 0.045408  |
| 328 | 7 | 0 | 14.837554 | 2.134758   | -1.354331 |
| 329 | 6 | 0 | 14.296164 | 0.006113   | -2.543850 |
| 330 | 1 | 0 | 13.152758 | 0.962808   | -1.024818 |
| 331 | 6 | 0 | 14.119778 | 3.282786   | -1.381361 |
| 332 | 1 | 0 | 15.849246 | 2.163244   | -1.293529 |
| 333 | 1 | 0 | 13.791660 | 0.545810   | -3.382400 |
| 334 | 1 | 0 | 13.779352 | -0.973531  | -2.393198 |
| 335 | 1 | 0 | 15.357192 | -0.189720  | -2.833531 |
| 336 | 6 | 0 | 14.949453 | 4.586855   | -1.367539 |
| 337 | 8 | 0 | 12.882496 | 3.316534   | -1.392454 |
| 338 | 7 | 0 | 14.234103 | 5.597587   | -2.148482 |
| 339 | 6 | 0 | 15.209329 | 4.963518   | 0.072766  |
| 340 | 1 | 0 | 15.917543 | 4.434465   | -1.861542 |
| 341 | 1 | 0 | 13.229341 | 5.714657   | -1.999429 |
| 342 | 6 | 0 | 14.890092 | 6.475649   | -2.949569 |

|     |   |   |            |           |           |
|-----|---|---|------------|-----------|-----------|
| 343 | 1 | 0 | 14.254953  | 5.133327  | 0.628274  |
| 344 | 1 | 0 | 15.774737  | 4.141935  | 0.576697  |
| 345 | 1 | 0 | 15.820027  | 5.898127  | 0.125282  |
| 346 | 6 | 0 | 13.959016  | 7.408237  | -3.758060 |
| 347 | 8 | 0 | 16.118091  | 6.530517  | -3.077842 |
| 348 | 7 | 0 | 14.657014  | 8.686486  | -3.931505 |
| 349 | 6 | 0 | 13.595854  | 6.714995  | -5.049837 |
| 350 | 1 | 0 | 13.037184  | 7.596615  | -3.199209 |
| 351 | 6 | 0 | 14.040997  | 9.885824  | -3.788026 |
| 352 | 1 | 0 | 15.665210  | 8.627805  | -4.020610 |
| 353 | 1 | 0 | 12.942964  | 7.371432  | -5.675913 |
| 354 | 1 | 0 | 13.031721  | 5.779277  | -4.813265 |
| 355 | 1 | 0 | 14.503961  | 6.447697  | -5.642607 |
| 356 | 6 | 0 | 14.936869  | 11.110578 | -3.898339 |
| 357 | 8 | 0 | 12.823773  | 10.002664 | -3.578613 |
| 358 | 1 | 0 | 14.560567  | 11.747633 | -4.704961 |
| 359 | 1 | 0 | 14.865608  | 11.680255 | -2.966291 |
| 360 | 1 | 0 | 15.985646  | 10.865710 | -4.091846 |
| 361 | 8 | 0 | -12.281670 | 6.949761  | 1.770239  |
| 362 | 6 | 0 | -13.347046 | 7.198027  | 2.356801  |
| 363 | 6 | 0 | -13.905975 | 8.639135  | 2.440033  |
| 364 | 7 | 0 | -14.087020 | 6.270730  | 3.008629  |
| 365 | 7 | 0 | -13.354185 | 9.279759  | 3.645968  |
| 366 | 1 | 0 | -14.994999 | 8.601355  | 2.569191  |
| 367 | 6 | 0 | -13.563902 | 9.376757  | 1.174271  |
| 368 | 1 | 0 | -14.874173 | 6.600560  | 3.560524  |
| 369 | 6 | 0 | -13.660207 | 4.869124  | 3.140371  |
| 370 | 6 | 0 | -13.954209 | 9.097554  | 4.853866  |
| 371 | 1 | 0 | -12.412027 | 9.672851  | 3.581113  |
| 372 | 1 | 0 | -12.455085 | 9.447213  | 1.038569  |
| 373 | 1 | 0 | -13.989880 | 8.823852  | 0.301792  |
| 374 | 1 | 0 | -13.989318 | 10.409366 | 1.190539  |
| 375 | 6 | 0 | -14.589380 | 3.950523  | 2.300764  |
| 376 | 6 | 0 | -13.693485 | 4.372413  | 4.564866  |
| 377 | 1 | 0 | -12.635391 | 4.809723  | 2.758260  |
| 378 | 6 | 0 | -13.263136 | 9.776552  | 6.027585  |
| 379 | 8 | 0 | -14.998330 | 8.444596  | 4.996735  |
| 380 | 8 | 0 | -15.816710 | 4.033262  | 2.369801  |
| 381 | 7 | 0 | -13.923433 | 3.031707  | 1.542388  |
| 382 | 1 | 0 | -14.729066 | 4.413051  | 4.984488  |
| 383 | 1 | 0 | -13.341923 | 3.311785  | 4.590256  |
| 384 | 1 | 0 | -13.021509 | 4.984192  | 5.214620  |
| 385 | 1 | 0 | -13.930779 | 10.548270 | 6.425895  |

|     |   |   |            |            |           |
|-----|---|---|------------|------------|-----------|
| 386 | 1 | 0 | -13.104609 | 9.037053   | 6.818692  |
| 387 | 1 | 0 | -12.308303 | 10.231334  | 5.748142  |
| 388 | 1 | 0 | -12.911509 | 3.108565   | 1.425809  |
| 389 | 6 | 0 | -14.651981 | 2.069131   | 0.714228  |
| 390 | 6 | 0 | -13.898159 | 0.721065   | 0.729169  |
| 391 | 1 | 0 | -15.646927 | 1.961641   | 1.164829  |
| 392 | 6 | 0 | -14.833754 | 2.481492   | -0.729198 |
| 393 | 8 | 0 | -12.659662 | 0.677536   | 0.716271  |
| 394 | 7 | 0 | -14.679914 | -0.384302  | 0.721414  |
| 395 | 1 | 0 | -13.849722 | 2.610315   | -1.242174 |
| 396 | 1 | 0 | -15.419423 | 1.698706   | -1.270067 |
| 397 | 1 | 0 | -15.392877 | 3.447481   | -0.787774 |
| 398 | 1 | 0 | -15.689674 | -0.301902  | 0.675492  |
| 399 | 6 | 0 | -14.129427 | -1.741231  | 0.613286  |
| 400 | 6 | 0 | -14.951132 | -2.516417  | -0.442819 |
| 401 | 1 | 0 | -13.088898 | -1.652435  | 0.286938  |
| 402 | 6 | 0 | -14.159336 | -2.523369  | 1.904877  |
| 403 | 8 | 0 | -16.162047 | -2.321875  | -0.583192 |
| 404 | 7 | 0 | -14.229106 | -3.435494  | -1.136395 |
| 405 | 1 | 0 | -15.204129 | -2.669597  | 2.272105  |
| 406 | 1 | 0 | -13.695186 | -3.525879  | 1.734508  |
| 407 | 1 | 0 | -13.574984 | -1.993657  | 2.696726  |
| 408 | 1 | 0 | -13.209538 | -3.423967  | -1.072959 |
| 409 | 6 | 0 | -14.851966 | -4.307881  | -2.132438 |
| 410 | 6 | 0 | -14.085878 | -5.650256  | -2.156468 |
| 411 | 1 | 0 | -15.889909 | -4.470519  | -1.814020 |
| 412 | 6 | 0 | -14.879494 | -3.751137  | -3.537823 |
| 413 | 8 | 0 | -12.882604 | -5.707658  | -1.862049 |
| 414 | 7 | 0 | -14.813626 | -6.722926  | -2.538490 |
| 415 | 1 | 0 | -15.431696 | -2.779080  | -3.555235 |
| 416 | 1 | 0 | -13.847755 | -3.578428  | -3.929538 |
| 417 | 1 | 0 | -15.404157 | -4.467153  | -4.216524 |
| 418 | 1 | 0 | -15.763998 | -6.603582  | -2.875926 |
| 419 | 6 | 0 | -14.216307 | -8.041427  | -2.789658 |
| 420 | 6 | 0 | -14.686954 | -8.513819  | -4.187349 |
| 421 | 1 | 0 | -13.128498 | -7.924985  | -2.778647 |
| 422 | 6 | 0 | -14.596254 | -9.091275  | -1.774342 |
| 423 | 8 | 0 | -15.812790 | -8.224174  | -4.604714 |
| 424 | 7 | 0 | -13.772916 | -9.264913  | -4.849428 |
| 425 | 1 | 0 | -14.302499 | -8.770354  | -0.744970 |
| 426 | 1 | 0 | -15.695535 | -9.290315  | -1.783308 |
| 427 | 1 | 0 | -14.057565 | -10.040374 | -2.016802 |
| 428 | 1 | 0 | -12.835228 | -9.331278  | -4.454016 |

|     |   |   |            |            |           |
|-----|---|---|------------|------------|-----------|
| 429 | 6 | 0 | -14.036458 | -9.829394  | -6.163899 |
| 430 | 1 | 0 | -13.816275 | -10.903690 | -6.174056 |
| 431 | 1 | 0 | -15.091967 | -9.676172  | -6.397911 |
| 432 | 1 | 0 | -13.429632 | -9.339155  | -6.936260 |
| 433 | 8 | 0 | -7.459191  | 7.095354   | 1.624785  |
| 434 | 6 | 0 | -8.697183  | 7.191783   | 1.617328  |
| 435 | 6 | 0 | -9.369917  | 8.555181   | 1.319922  |
| 436 | 7 | 0 | -9.539234  | 6.159324   | 1.836690  |
| 437 | 7 | 0 | -8.744423  | 9.588416   | 2.158188  |
| 438 | 1 | 0 | -10.432070 | 8.518012   | 1.583675  |
| 439 | 6 | 0 | -9.236384  | 8.817442   | -0.161036 |
| 440 | 1 | 0 | -10.551139 | 6.326552   | 1.847426  |
| 441 | 6 | 0 | -9.043719  | 4.810395   | 2.165187  |
| 442 | 6 | 0 | -9.437378  | 10.296592  | 3.082779  |
| 443 | 1 | 0 | -7.746304  | 9.776294   | 2.035179  |
| 444 | 1 | 0 | -8.161935  | 8.850387   | -0.469276 |
| 445 | 1 | 0 | -9.745282  | 7.998048   | -0.725449 |
| 446 | 1 | 0 | -9.715802  | 9.788494   | -0.434690 |
| 447 | 6 | 0 | -9.847348  | 3.779312   | 1.341577  |
| 448 | 6 | 0 | -9.191399  | 4.446747   | 3.623829  |
| 449 | 1 | 0 | -7.984597  | 4.781020   | 1.890660  |
| 450 | 6 | 0 | -8.619865  | 11.306431  | 3.873880  |
| 451 | 8 | 0 | -10.652888 | 10.150194  | 3.298010  |
| 452 | 8 | 0 | -11.078214 | 3.701502   | 1.458316  |
| 453 | 7 | 0 | -9.109043  | 2.988502   | 0.528180  |
| 454 | 1 | 0 | -10.267054 | 4.442683   | 3.929662  |
| 455 | 1 | 0 | -8.771021  | 3.425233   | 3.791850  |
| 456 | 1 | 0 | -8.637629  | 5.170494   | 4.269587  |
| 457 | 1 | 0 | -9.094943  | 12.288164  | 3.776140  |
| 458 | 1 | 0 | -8.656511  | 11.027397  | 4.932683  |
| 459 | 1 | 0 | -7.580233  | 11.359342  | 3.541516  |
| 460 | 1 | 0 | -8.102837  | 3.154169   | 0.448935  |
| 461 | 6 | 0 | -9.734141  | 1.958874   | -0.314943 |
| 462 | 6 | 0 | -9.103326  | 0.583297   | 0.004773  |
| 463 | 1 | 0 | -10.800336 | 1.954460   | -0.065913 |
| 464 | 6 | 0 | -9.567527  | 2.203028   | -1.795739 |
| 465 | 8 | 0 | -7.873660  | 0.424045   | -0.046800 |
| 466 | 7 | 0 | -9.987241  | -0.395684  | 0.300679  |
| 467 | 1 | 0 | -8.487551  | 2.201540   | -2.084689 |
| 468 | 1 | 0 | -10.088983 | 1.393762   | -2.362974 |
| 469 | 1 | 0 | -10.013253 | 3.185239   | -2.086283 |
| 470 | 1 | 0 | -10.974277 | -0.150730  | 0.415149  |
| 471 | 6 | 0 | -9.566793  | -1.778537  | 0.581605  |

|     |   |   |            |            |           |
|-----|---|---|------------|------------|-----------|
| 472 | 6 | 0 | -10.179399 | -2.724982  | -0.483070 |
| 473 | 1 | 0 | -8.473291  | -1.800668  | 0.523583  |
| 474 | 6 | 0 | -10.011588 | -2.273593  | 1.936620  |
| 475 | 8 | 0 | -11.400202 | -2.719523  | -0.701277 |
| 476 | 7 | 0 | -9.301229  | -3.546988  | -1.102388 |
| 477 | 1 | 0 | -11.128359 | -2.281993  | 2.014741  |
| 478 | 1 | 0 | -9.637082  | -3.315351  | 2.088532  |
| 479 | 1 | 0 | -9.602655  | -1.625803  | 2.749491  |
| 480 | 1 | 0 | -8.298116  | -3.425838  | -0.938508 |
| 481 | 6 | 0 | -9.737029  | -4.485618  | -2.147949 |
| 482 | 6 | 0 | -9.248349  | -5.913073  | -1.805637 |
| 483 | 1 | 0 | -10.831050 | -4.453174  | -2.160842 |
| 484 | 6 | 0 | -9.212684  | -4.147329  | -3.523441 |
| 485 | 8 | 0 | -8.046102  | -6.147180  | -1.605500 |
| 486 | 7 | 0 | -10.218723 | -6.854154  | -1.786057 |
| 487 | 1 | 0 | -9.546243  | -3.127322  | -3.833317 |
| 488 | 1 | 0 | -8.095287  | -4.180136  | -3.546225 |
| 489 | 1 | 0 | -9.605494  | -4.889394  | -4.260769 |
| 490 | 1 | 0 | -11.195491 | -6.559365  | -1.868504 |
| 491 | 6 | 0 | -9.927931  | -8.280343  | -1.557363 |
| 492 | 6 | 0 | -10.102834 | -9.066200  | -2.884244 |
| 493 | 1 | 0 | -8.886104  | -8.342262  | -1.221822 |
| 494 | 6 | 0 | -10.829972 | -8.908617  | -0.524829 |
| 495 | 8 | 0 | -11.196438 | -9.096811  | -3.473492 |
| 496 | 7 | 0 | -9.004561  | -9.704411  | -3.328291 |
| 497 | 1 | 0 | -10.755658 | -8.370366  | 0.451106  |
| 498 | 1 | 0 | -11.898042 | -8.891928  | -0.861795 |
| 499 | 1 | 0 | -10.525403 | -9.972453  | -0.369420 |
| 500 | 1 | 0 | -8.122273  | -9.623910  | -2.818757 |
| 501 | 6 | 0 | -9.024552  | -10.486529 | -4.556177 |
| 502 | 1 | 0 | -8.062236  | -10.994009 | -4.659165 |
| 503 | 1 | 0 | -9.825695  | -11.233379 | -4.529102 |
| 504 | 1 | 0 | -9.187979  | -9.848151  | -5.433177 |

P Pl (Ac-AAAAAA-NHMe)<sub>8</sub>

|    |   |   |           |           |           |
|----|---|---|-----------|-----------|-----------|
| 1  | 6 | 0 | -1.640772 | 11.558430 | 1.504184  |
| 2  | 6 | 0 | -2.470030 | 10.436293 | 0.898169  |
| 3  | 1 | 0 | -2.117517 | 12.512705 | 1.257258  |
| 4  | 1 | 0 | -1.661464 | 11.452785 | 2.594460  |
| 5  | 1 | 0 | -0.606447 | 11.554648 | 1.151823  |
| 6  | 8 | 0 | -3.683810 | 10.334779 | 1.145224  |
| 7  | 7 | 0 | -1.788646 | 9.577212  | 0.099788  |
| 8  | 1 | 0 | -0.795128 | 9.743032  | -0.076957 |
| 9  | 6 | 0 | -2.441154 | 8.434463  | -0.555052 |
| 10 | 6 | 0 | -1.728234 | 7.131530  | -0.120833 |
| 11 | 6 | 0 | -2.403112 | 8.494995  | -2.063340 |
| 12 | 1 | 0 | -3.483130 | 8.426609  | -0.217705 |
| 13 | 8 | 0 | -0.500362 | 7.009741  | -0.258418 |
| 14 | 7 | 0 | -2.537999 | 6.172142  | 0.378486  |
| 15 | 1 | 0 | -2.908365 | 9.419199  | -2.434886 |
| 16 | 1 | 0 | -1.350316 | 8.487626  | -2.439451 |
| 17 | 1 | 0 | -2.936337 | 7.605742  | -2.479894 |
| 18 | 1 | 0 | -3.530759 | 6.379459  | 0.525578  |
| 19 | 6 | 0 | -2.016716 | 4.875141  | 0.837134  |
| 20 | 6 | 0 | -2.757222 | 3.738761  | 0.092728  |
| 21 | 6 | 0 | -2.199321 | 4.641660  | 2.318123  |
| 22 | 1 | 0 | -0.949174 | 4.853759  | 0.595609  |
| 23 | 8 | 0 | -3.995657 | 3.674266  | 0.113639  |
| 24 | 7 | 0 | -1.960584 | 2.843183  | -0.530275 |
| 25 | 1 | 0 | -3.283067 | 4.644748  | 2.594250  |
| 26 | 1 | 0 | -1.765235 | 3.648760  | 2.590391  |
| 27 | 1 | 0 | -1.678127 | 5.432659  | 2.909993  |
| 28 | 1 | 0 | -0.949305 | 3.000911  | -0.549134 |
| 29 | 6 | 0 | -2.504784 | 1.672730  | -1.236930 |
| 30 | 6 | 0 | -1.874594 | 0.397561  | -0.629230 |
| 31 | 6 | 0 | -2.215897 | 1.670101  | -2.718378 |
| 32 | 1 | 0 | -3.588014 | 1.674584  | -1.077006 |
| 33 | 8 | 0 | -0.640439 | 0.269341  | -0.583455 |
| 34 | 7 | 0 | -2.753281 | -0.526356 | -0.186212 |
| 35 | 1 | 0 | -2.647500 | 2.577271  | -3.206688 |
| 36 | 1 | 0 | -1.115021 | 1.649244  | -2.912845 |
| 37 | 1 | 0 | -2.676433 | 0.763150  | -3.180911 |
| 38 | 1 | 0 | -3.756127 | -0.316242 | -0.208025 |
| 39 | 6 | 0 | -2.314344 | -1.797030 | 0.411270  |
| 40 | 6 | 0 | -2.927798 | -2.966874 | -0.394195 |
| 41 | 6 | 0 | -2.735682 | -1.963261 | 1.851614  |

|    |   |   |           |            |           |
|----|---|---|-----------|------------|-----------|
| 42 | 1 | 0 | -1.221838 | -1.823842  | 0.346356  |
| 43 | 8 | 0 | -4.152593 | -3.030351  | -0.575705 |
| 44 | 7 | 0 | -2.042915 | -3.884643  | -0.841104 |
| 45 | 1 | 0 | -2.315327 | -1.143846  | 2.483656  |
| 46 | 1 | 0 | -3.849802 | -1.952597  | 1.947718  |
| 47 | 1 | 0 | -2.354572 | -2.940853  | 2.235779  |
| 48 | 1 | 0 | -1.042010 | -3.721992  | -0.702112 |
| 49 | 6 | 0 | -2.463731 | -5.075622  | -1.595870 |
| 50 | 6 | 0 | -2.012835 | -6.337605  | -0.822197 |
| 51 | 6 | 0 | -1.875126 | -5.149558  | -2.983538 |
| 52 | 1 | 0 | -3.556487 | -5.043004  | -1.663896 |
| 53 | 8 | 0 | -0.816771 | -6.512072  | -0.538339 |
| 54 | 7 | 0 | -3.002761 | -7.199929  | -0.506948 |
| 55 | 1 | 0 | -2.170468 | -4.256977  | -3.586664 |
| 56 | 1 | 0 | -0.758751 | -5.200452  | -2.943681 |
| 57 | 1 | 0 | -2.254801 | -6.067296  | -3.495691 |
| 58 | 1 | 0 | -3.970985 | -6.963039  | -0.742736 |
| 59 | 6 | 0 | -2.744972 | -8.459999  | 0.210419  |
| 60 | 6 | 0 | -3.018608 | -9.648771  | -0.742621 |
| 61 | 6 | 0 | -3.605934 | -8.632892  | 1.436513  |
| 62 | 1 | 0 | -1.688465 | -8.447363  | 0.501442  |
| 63 | 8 | 0 | -4.152135 | -9.847555  | -1.210188 |
| 64 | 7 | 0 | -1.956135 | -10.428017 | -1.017808 |
| 65 | 1 | 0 | -3.341680 | -9.595309  | 1.938932  |
| 66 | 1 | 0 | -3.443275 | -7.796583  | 2.158801  |
| 67 | 1 | 0 | -4.690090 | -8.662263  | 1.162320  |
| 68 | 1 | 0 | -1.038896 | -10.201067 | -0.628078 |
| 69 | 6 | 0 | -2.064981 | -11.578800 | -1.903026 |
| 70 | 1 | 0 | -1.118160 | -12.123850 | -1.881276 |
| 71 | 1 | 0 | -2.872043 | -12.244002 | -1.576909 |
| 72 | 1 | 0 | -2.276165 | -11.270670 | -2.934614 |
| 73 | 8 | 0 | 0.652083  | -9.980280  | 0.015857  |
| 74 | 6 | 0 | 1.774568  | -9.710891  | 0.474247  |
| 75 | 7 | 0 | 2.840796  | -10.523561 | 0.350149  |
| 76 | 6 | 0 | 2.031297  | -8.389774  | 1.238807  |
| 77 | 1 | 0 | 3.746475  | -10.239368 | 0.728655  |
| 78 | 6 | 0 | 2.748786  | -11.799179 | -0.345939 |
| 79 | 6 | 0 | 1.145615  | -8.373870  | 2.459571  |
| 80 | 1 | 0 | 3.081437  | -8.331570  | 1.546251  |
| 81 | 7 | 0 | 1.793123  | -7.254282  | 0.331816  |
| 82 | 1 | 0 | 3.697245  | -12.328630 | -0.227159 |
| 83 | 1 | 0 | 1.939912  | -12.410771 | 0.068827  |
| 84 | 1 | 0 | 2.550657  | -11.656244 | -1.415389 |

|     |   |   |          |           |           |
|-----|---|---|----------|-----------|-----------|
| 85  | 1 | 0 | 1.396583 | -9.248844 | 3.107625  |
| 86  | 1 | 0 | 1.297042 | -7.437619 | 3.049541  |
| 87  | 1 | 0 | 0.066949 | -8.444030 | 2.171668  |
| 88  | 1 | 0 | 0.833069 | -7.066646 | 0.027987  |
| 89  | 6 | 0 | 2.785658 | -6.425293 | -0.055447 |
| 90  | 8 | 0 | 3.968736 | -6.533109 | 0.305675  |
| 91  | 6 | 0 | 2.358734 | -5.294621 | -1.021680 |
| 92  | 6 | 0 | 2.983308 | -5.575341 | -2.366456 |
| 93  | 1 | 0 | 1.268318 | -5.274666 | -1.123075 |
| 94  | 7 | 0 | 2.761838 | -4.003683 | -0.442238 |
| 95  | 1 | 0 | 2.706163 | -4.783692 | -3.104185 |
| 96  | 1 | 0 | 4.098050 | -5.618188 | -2.290546 |
| 97  | 1 | 0 | 2.614353 | -6.559976 | -2.744787 |
| 98  | 1 | 0 | 3.757511 | -3.823739 | -0.289887 |
| 99  | 6 | 0 | 1.866396 | -3.034083 | -0.154261 |
| 100 | 8 | 0 | 0.647532 | -3.125389 | -0.363011 |
| 101 | 6 | 0 | 2.458241 | -1.766005 | 0.505005  |
| 102 | 6 | 0 | 1.997175 | -1.743315 | 1.942954  |
| 103 | 1 | 0 | 3.551928 | -1.799955 | 0.475693  |
| 104 | 7 | 0 | 2.040833 | -0.584079 | -0.264724 |
| 105 | 1 | 0 | 2.404518 | -0.849232 | 2.474321  |
| 106 | 1 | 0 | 2.363232 | -2.662984 | 2.461330  |
| 107 | 1 | 0 | 0.880967 | -1.718821 | 2.006484  |
| 108 | 1 | 0 | 1.039385 | -0.381930 | -0.348229 |
| 109 | 6 | 0 | 2.935335 | 0.292122  | -0.769030 |
| 110 | 8 | 0 | 4.166718 | 0.180486  | -0.653852 |
| 111 | 6 | 0 | 2.329574 | 1.487286  | -1.542128 |
| 112 | 6 | 0 | 2.686882 | 1.325335  | -2.999444 |
| 113 | 1 | 0 | 1.240155 | 1.498389  | -1.432337 |
| 114 | 7 | 0 | 2.838870 | 2.731699  | -0.943959 |
| 115 | 1 | 0 | 2.275861 | 2.170334  | -3.603371 |
| 116 | 1 | 0 | 2.250794 | 0.369699  | -3.380507 |
| 117 | 1 | 0 | 3.795639 | 1.291973  | -3.139864 |
| 118 | 1 | 0 | 3.849136 | 2.895554  | -0.943135 |
| 119 | 6 | 0 | 2.015622 | 3.676739  | -0.439784 |
| 120 | 8 | 0 | 0.777776 | 3.602841  | -0.451134 |
| 121 | 6 | 0 | 2.723108 | 4.892012  | 0.204983  |
| 122 | 6 | 0 | 2.486639 | 4.819659  | 1.694732  |
| 123 | 1 | 0 | 3.798964 | 4.853870  | 0.005861  |
| 124 | 7 | 0 | 2.212968 | 6.125923  | -0.412469 |
| 125 | 1 | 0 | 1.393409 | 4.843231  | 1.929053  |
| 126 | 1 | 0 | 2.914927 | 3.866148  | 2.089438  |
| 127 | 1 | 0 | 2.981678 | 5.674992  | 2.215312  |



|     |   |   |          |            |           |
|-----|---|---|----------|------------|-----------|
| 128 | 6 | 0 | 3.036046 | 7.030373   | -0.986772 |
| 129 | 1 | 0 | 1.213393 | 6.336986   | -0.332024 |
| 130 | 6 | 0 | 2.332347 | 8.262512   | -1.602606 |
| 131 | 8 | 0 | 4.269568 | 6.908046   | -1.057417 |
| 132 | 7 | 0 | 2.954563 | 9.482580   | -1.069754 |
| 133 | 6 | 0 | 2.424720 | 8.137248   | -3.104801 |
| 134 | 1 | 0 | 1.278504 | 8.285039   | -1.305220 |
| 135 | 1 | 0 | 3.957473 | 9.623323   | -1.211689 |
| 136 | 6 | 0 | 2.233911 | 10.443202  | -0.439434 |
| 137 | 1 | 0 | 1.927611 | 9.003494   | -3.604798 |
| 138 | 1 | 0 | 3.490411 | 8.094722   | -3.439924 |
| 139 | 1 | 0 | 1.912142 | 7.198110   | -3.427111 |
| 140 | 8 | 0 | 1.006825 | 10.376417  | -0.253832 |
| 141 | 6 | 0 | 3.034601 | 11.638643  | 0.054448  |
| 142 | 1 | 0 | 2.589752 | 12.548420  | -0.362025 |
| 143 | 1 | 0 | 2.936608 | 11.693799  | 1.144154  |
| 144 | 1 | 0 | 4.090653 | 11.580221  | -0.220148 |
| 145 | 8 | 0 | 5.408219 | -9.883099  | 1.411676  |
| 146 | 6 | 0 | 6.495518 | -9.539848  | 1.903679  |
| 147 | 6 | 0 | 6.702525 | -8.115949  | 2.474929  |
| 148 | 7 | 0 | 7.564260 | -10.355137 | 1.984875  |
| 149 | 7 | 0 | 6.520507 | -7.129743  | 1.396238  |
| 150 | 6 | 0 | 5.741536 | -7.925975  | 3.621782  |
| 151 | 1 | 0 | 7.730862 | -8.003594  | 2.836284  |
| 152 | 1 | 0 | 8.439046 | -10.010420 | 2.384339  |
| 153 | 6 | 0 | 7.517015 | -11.724430 | 1.491533  |
| 154 | 1 | 0 | 5.576932 | -6.984036  | 1.024217  |
| 155 | 6 | 0 | 7.540230 | -6.378943  | 0.931717  |
| 156 | 1 | 0 | 5.950038 | -8.692876  | 4.407286  |
| 157 | 1 | 0 | 5.856641 | -6.911278  | 4.074282  |
| 158 | 1 | 0 | 4.682969 | -8.046757  | 3.280877  |
| 159 | 1 | 0 | 8.439253 | -12.231911 | 1.784746  |
| 160 | 1 | 0 | 6.660056 | -12.259140 | 1.915344  |
| 161 | 1 | 0 | 7.426467 | -11.751824 | 0.398563  |
| 162 | 6 | 0 | 7.175322 | -5.389668  | -0.199590 |
| 163 | 8 | 0 | 8.707283 | -6.446144  | 1.352066  |
| 164 | 7 | 0 | 7.544034 | -4.032317  | 0.235212  |
| 165 | 6 | 0 | 7.883100 | -5.836633  | -1.454891 |
| 166 | 1 | 0 | 6.093560 | -5.388464  | -0.370718 |
| 167 | 6 | 0 | 6.635310 | -3.036218  | 0.326365  |
| 168 | 1 | 0 | 8.526039 | -3.830845  | 0.438209  |
| 169 | 1 | 0 | 7.657071 | -5.146408  | -2.303574 |
| 170 | 1 | 0 | 8.990499 | -5.865569  | -1.302878 |

|     |   |   |          |           |           |
|-----|---|---|----------|-----------|-----------|
| 171 | 1 | 0 | 7.534860 | -6.862859 | -1.727641 |
| 172 | 6 | 0 | 7.182770 | -1.690995 | 0.859882  |
| 173 | 8 | 0 | 5.435562 | -3.160256 | 0.040157  |
| 174 | 7 | 0 | 6.821383 | -0.616500 | -0.077391 |
| 175 | 6 | 0 | 6.621141 | -1.492481 | 2.247832  |
| 176 | 1 | 0 | 8.275731 | -1.720363 | 0.911638  |
| 177 | 6 | 0 | 7.749708 | 0.188601  | -0.635647 |
| 178 | 1 | 0 | 5.827818 | -0.427241 | -0.245177 |
| 179 | 1 | 0 | 6.988568 | -0.534675 | 2.689694  |
| 180 | 1 | 0 | 5.503077 | -1.471180 | 2.229331  |
| 181 | 1 | 0 | 6.950491 | -2.336029 | 2.902352  |
| 182 | 6 | 0 | 7.196240 | 1.280668  | -1.581356 |
| 183 | 8 | 0 | 8.972297 | 0.090176  | -0.440098 |
| 184 | 7 | 0 | 7.666168 | 2.591320  | -1.103256 |
| 185 | 6 | 0 | 7.646965 | 0.950842  | -2.983371 |
| 186 | 1 | 0 | 6.101976 | 1.298094  | -1.543774 |
| 187 | 6 | 0 | 6.811423 | 3.584283  | -0.772128 |
| 188 | 1 | 0 | 8.673840 | 2.763323  | -1.063126 |
| 189 | 1 | 0 | 7.277568 | 1.716527  | -3.707913 |
| 190 | 1 | 0 | 8.762491 | 0.907629  | -3.046758 |
| 191 | 1 | 0 | 7.234885 | -0.045485 | -3.276900 |
| 192 | 6 | 0 | 7.475953 | 4.877756  | -0.242306 |
| 193 | 8 | 0 | 5.577248 | 3.497734  | -0.849541 |
| 194 | 7 | 0 | 6.984761 | 6.025056  | -1.020921 |
| 195 | 6 | 0 | 7.168154 | 4.976285  | 1.232631  |
| 196 | 1 | 0 | 8.560569 | 4.833028  | -0.385248 |
| 197 | 6 | 0 | 7.818737 | 6.825252  | -1.719524 |
| 198 | 1 | 0 | 5.985300 | 6.248962  | -0.987335 |
| 199 | 1 | 0 | 6.064554 | 5.009260  | 1.410865  |
| 200 | 1 | 0 | 7.587071 | 4.082580  | 1.756299  |
| 201 | 1 | 0 | 7.627542 | 5.894737  | 1.672053  |
| 202 | 6 | 0 | 7.132732 | 7.980907  | -2.486461 |
| 203 | 8 | 0 | 9.049725 | 6.670484  | -1.779554 |
| 204 | 7 | 0 | 7.735847 | 9.253008  | -2.063569 |
| 205 | 1 | 0 | 6.069656 | 8.030268  | -2.227400 |
| 206 | 6 | 0 | 7.277092 | 7.700143  | -3.963000 |
| 207 | 6 | 0 | 6.998430 | 10.269100 | -1.549801 |
| 208 | 1 | 0 | 8.738361 | 9.389768  | -2.209726 |
| 209 | 1 | 0 | 8.354069 | 7.625974  | -4.254088 |
| 210 | 1 | 0 | 6.775922 | 6.730797  | -4.203323 |
| 211 | 1 | 0 | 6.798236 | 8.507799  | -4.567864 |
| 212 | 6 | 0 | 7.786532 | 11.510866 | -1.160409 |
| 213 | 8 | 0 | 5.768370 | 10.216142 | -1.384168 |

|     |   |   |           |            |           |
|-----|---|---|-----------|------------|-----------|
| 214 | 1 | 0 | 7.332308  | 12.377367  | -1.651830 |
| 215 | 1 | 0 | 7.688980  | 11.657171  | -0.079033 |
| 216 | 1 | 0 | 8.843444  | 11.440352  | -1.428973 |
| 217 | 1 | 0 | 10.226630 | -6.782511  | 2.252741  |
| 218 | 7 | 0 | 11.138637 | -6.829064  | 2.718935  |
| 219 | 6 | 0 | 12.167783 | -6.106890  | 2.232562  |
| 220 | 6 | 0 | 11.245188 | -7.581811  | 3.980244  |
| 221 | 6 | 0 | 11.898428 | -5.354997  | 0.907800  |
| 222 | 8 | 0 | 13.282040 | -6.028783  | 2.774500  |
| 223 | 6 | 0 | 11.069868 | -9.093907  | 3.700812  |
| 224 | 6 | 0 | 10.215032 | -7.176944  | 5.005708  |
| 225 | 1 | 0 | 12.247323 | -7.386445  | 4.376840  |
| 226 | 7 | 0 | 12.293829 | -3.948677  | 1.087219  |
| 227 | 6 | 0 | 12.655498 | -6.059468  | -0.190414 |
| 228 | 1 | 0 | 10.827889 | -5.364519  | 0.677079  |
| 229 | 8 | 0 | 10.042197 | -9.530701  | 3.158498  |
| 230 | 7 | 0 | 12.088994 | -9.878054  | 4.104022  |
| 231 | 1 | 0 | 10.369842 | -7.772475  | 5.938518  |
| 232 | 1 | 0 | 10.307166 | -6.092231  | 5.255965  |
| 233 | 1 | 0 | 9.179212  | -7.369293  | 4.629851  |
| 234 | 6 | 0 | 11.392717 | -2.941134  | 1.054094  |
| 235 | 1 | 0 | 13.277747 | -3.736720  | 1.258970  |
| 236 | 1 | 0 | 12.494117 | -5.549796  | -1.171338 |
| 237 | 1 | 0 | 13.752666 | -6.078507  | 0.024651  |
| 238 | 1 | 0 | 12.289782 | -7.112385  | -0.271682 |
| 239 | 1 | 0 | 12.933499 | -9.462663  | 4.501339  |
| 240 | 6 | 0 | 12.055516 | -11.324102 | 3.929548  |
| 241 | 6 | 0 | 11.957891 | -1.543238  | 1.393737  |
| 242 | 8 | 0 | 10.188806 | -3.094297  | 0.803834  |
| 243 | 1 | 0 | 12.879858 | -11.762022 | 4.497443  |
| 244 | 1 | 0 | 11.107412 | -11.731115 | 4.295476  |
| 245 | 1 | 0 | 12.160190 | -11.603047 | 2.873457  |
| 246 | 7 | 0 | 11.609565 | -0.603470  | 0.317432  |
| 247 | 6 | 0 | 11.410008 | -1.148935  | 2.744847  |
| 248 | 1 | 0 | 13.050850 | -1.577116  | 1.444217  |
| 249 | 6 | 0 | 12.551112 | 0.145601   | -0.295044 |
| 250 | 1 | 0 | 10.619529 | -0.449071  | 0.098573  |
| 251 | 1 | 0 | 11.790408 | -0.143061  | 3.046923  |
| 252 | 1 | 0 | 10.292304 | -1.118279  | 2.731179  |
| 253 | 1 | 0 | 11.736530 | -1.896953  | 3.507929  |
| 254 | 6 | 0 | 12.031730 | 1.083519   | -1.412972 |
| 255 | 8 | 0 | 13.763338 | 0.092621   | -0.028009 |
| 256 | 7 | 0 | 12.501262 | 2.454567   | -1.153230 |

|     |   |   |           |           |           |
|-----|---|---|-----------|-----------|-----------|
| 257 | 6 | 0 | 12.509875 | 0.526445  | -2.732082 |
| 258 | 1 | 0 | 10.936832 | 1.111161  | -1.402703 |
| 259 | 1 | 0 | 13.502617 | 2.647774  | -1.221936 |
| 260 | 6 | 0 | 11.643033 | 3.481356  | -0.950477 |
| 261 | 1 | 0 | 12.163720 | 1.165371  | -3.580430 |
| 262 | 1 | 0 | 12.095052 | -0.502079 | -2.869041 |
| 263 | 1 | 0 | 13.626992 | 0.467023  | -2.762450 |
| 264 | 6 | 0 | 12.306639 | 4.845077  | -0.647742 |
| 265 | 8 | 0 | 10.409235 | 3.371275  | -0.967139 |
| 266 | 7 | 0 | 11.782862 | 5.854729  | -1.581439 |
| 267 | 6 | 0 | 12.045332 | 5.166371  | 0.804388  |
| 268 | 1 | 0 | 13.386683 | 4.790680  | -0.817126 |
| 269 | 6 | 0 | 12.609769 | 6.623781  | -2.324067 |
| 270 | 1 | 0 | 10.774877 | 6.040556  | -1.594579 |
| 271 | 1 | 0 | 10.947938 | 5.218951  | 1.012447  |
| 272 | 1 | 0 | 12.491173 | 4.366734  | 1.444874  |
| 273 | 1 | 0 | 12.508020 | 6.144472  | 1.081876  |
| 274 | 6 | 0 | 11.905118 | 7.610279  | -3.289719 |
| 275 | 8 | 0 | 13.848939 | 6.539534  | -2.293995 |
| 276 | 7 | 0 | 12.480465 | 8.955439  | -3.146919 |
| 277 | 6 | 0 | 12.043506 | 7.042799  | -4.683098 |
| 278 | 1 | 0 | 10.842793 | 7.689484  | -3.033822 |
| 279 | 1 | 0 | 13.449204 | 9.113195  | -3.428418 |
| 280 | 6 | 0 | 11.733411 | 10.023264 | -2.763753 |
| 281 | 1 | 0 | 11.550420 | 7.708077  | -5.432638 |
| 282 | 1 | 0 | 11.553019 | 6.039488  | -4.721698 |
| 283 | 1 | 0 | 13.120470 | 6.924069  | -4.964428 |
| 284 | 6 | 0 | 12.478608 | 11.346526 | -2.682076 |
| 285 | 8 | 0 | 10.527726 | 9.951719  | -2.477514 |
| 286 | 1 | 0 | 11.914251 | 12.095444 | -3.246664 |
| 287 | 1 | 0 | 12.495808 | 11.668239 | -1.634777 |
| 288 | 1 | 0 | 13.500247 | 11.282444 | -3.063741 |
| 289 | 1 | 0 | 14.825325 | -6.059815 | 3.597117  |
| 290 | 7 | 0 | 15.739018 | -6.190272 | 4.040932  |
| 291 | 6 | 0 | 16.872734 | -6.008683 | 3.325467  |
| 292 | 6 | 0 | 15.772773 | -6.839934 | 5.364192  |
| 293 | 6 | 0 | 16.654978 | -5.381814 | 1.926235  |
| 294 | 8 | 0 | 18.007152 | -6.298409 | 3.736168  |
| 295 | 6 | 0 | 15.714328 | -8.374151 | 5.146297  |
| 296 | 6 | 0 | 14.647608 | -6.412161 | 6.264095  |
| 297 | 1 | 0 | 16.733962 | -6.577239 | 5.823822  |
| 298 | 7 | 0 | 17.108449 | -3.977647 | 1.950261  |
| 299 | 6 | 0 | 17.378212 | -6.226945 | 0.909469  |

|     |   |   |           |            |           |
|-----|---|---|-----------|------------|-----------|
| 300 | 1 | 0 | 15.586003 | -5.347731  | 1.688664  |
| 301 | 8 | 0 | 14.653703 | -9.016008  | 5.168667  |
| 302 | 7 | 0 | 16.924870 | -8.928712  | 4.887955  |
| 303 | 1 | 0 | 14.737603 | -6.949112  | 7.240197  |
| 304 | 1 | 0 | 14.685268 | -5.311687  | 6.452405  |
| 305 | 1 | 0 | 13.654280 | -6.665375  | 5.816825  |
| 306 | 6 | 0 | 16.279813 | -2.929174  | 1.700412  |
| 307 | 1 | 0 | 18.091106 | -3.803000  | 2.120643  |
| 308 | 1 | 0 | 17.272765 | -5.796306  | -0.115853 |
| 309 | 1 | 0 | 18.465967 | -6.310626  | 1.155282  |
| 310 | 1 | 0 | 16.938824 | -7.254603  | 0.909543  |
| 311 | 1 | 0 | 17.690941 | -8.281421  | 4.714445  |
| 312 | 6 | 0 | 17.081773 | -10.327293 | 4.512886  |
| 313 | 6 | 0 | 16.936068 | -1.531847  | 1.794791  |
| 314 | 8 | 0 | 15.078166 | -3.056682  | 1.441985  |
| 315 | 1 | 0 | 18.078832 | -10.671779 | 4.803024  |
| 316 | 1 | 0 | 16.329719 | -10.921763 | 5.036424  |
| 317 | 1 | 0 | 16.953741 | -10.479028 | 3.432727  |
| 318 | 7 | 0 | 16.454693 | -0.712666  | 0.679921  |
| 319 | 6 | 0 | 16.636002 | -0.973016  | 3.165987  |
| 320 | 1 | 0 | 18.025130 | -1.598812  | 1.678289  |
| 321 | 6 | 0 | 17.298490 | 0.073876   | -0.042728 |
| 322 | 1 | 0 | 15.446543 | -0.618062  | 0.536039  |
| 323 | 1 | 0 | 17.106882 | 0.032827   | 3.289377  |
| 324 | 1 | 0 | 17.051170 | -1.657765  | 3.945253  |
| 325 | 1 | 0 | 15.535224 | -0.871935  | 3.330226  |
| 326 | 6 | 0 | 16.613696 | 0.808335   | -1.219255 |
| 327 | 8 | 0 | 18.510928 | 0.181146   | 0.161181  |
| 328 | 7 | 0 | 17.231798 | 2.133284   | -1.365872 |
| 329 | 6 | 0 | 16.732455 | -0.061845  | -2.447700 |
| 330 | 1 | 0 | 15.552392 | 0.962937   | -1.002763 |
| 331 | 6 | 0 | 16.504897 | 3.271856   | -1.461186 |
| 332 | 1 | 0 | 18.242165 | 2.174560   | -1.291825 |
| 333 | 1 | 0 | 16.237179 | 0.425970   | -3.322723 |
| 334 | 1 | 0 | 16.223524 | -1.037847  | -2.253024 |
| 335 | 1 | 0 | 17.800464 | -0.260802  | -2.708168 |
| 336 | 6 | 0 | 17.324006 | 4.582004   | -1.503034 |
| 337 | 8 | 0 | 15.267648 | 3.294147   | -1.490390 |
| 338 | 7 | 0 | 16.614652 | 5.544029   | -2.348505 |
| 339 | 6 | 0 | 17.556029 | 5.036606   | -0.080550 |
| 340 | 1 | 0 | 18.301623 | 4.411855   | -1.971815 |
| 341 | 1 | 0 | 15.607035 | 5.662053   | -2.221176 |
| 342 | 6 | 0 | 17.278389 | 6.387269   | -3.180175 |

|     |   |   |            |           |           |
|-----|---|---|------------|-----------|-----------|
| 343 | 1 | 0 | 16.590886  | 5.227569  | 0.448879  |
| 344 | 1 | 0 | 18.118713  | 4.247633  | 0.475813  |
| 345 | 1 | 0 | 18.158748  | 5.977755  | -0.067418 |
| 346 | 6 | 0 | 16.354917  | 7.270693  | -4.050417 |
| 347 | 8 | 0 | 18.508025  | 6.446472  | -3.288957 |
| 348 | 7 | 0 | 17.045522  | 8.545280  | -4.273707 |
| 349 | 6 | 0 | 16.021532  | 6.511867  | -5.312993 |
| 350 | 1 | 0 | 15.421418  | 7.477903  | -3.518205 |
| 351 | 6 | 0 | 16.417618  | 9.744691  | -4.198203 |
| 352 | 1 | 0 | 18.055602  | 8.491371  | -4.342050 |
| 353 | 1 | 0 | 15.373661  | 7.130340  | -5.981495 |
| 354 | 1 | 0 | 15.462268  | 5.582873  | -5.041033 |
| 355 | 1 | 0 | 16.942585  | 6.225587  | -5.876191 |
| 356 | 6 | 0 | 17.305408  | 10.970585 | -4.352249 |
| 357 | 8 | 0 | 15.196048  | 9.860770  | -4.015457 |
| 358 | 1 | 0 | 16.939983  | 11.563150 | -5.196915 |
| 359 | 1 | 0 | 17.210944  | 11.585399 | -3.451486 |
| 360 | 1 | 0 | 18.359775  | 10.726119 | -4.512951 |
| 361 | 8 | 0 | -14.670482 | 6.812353  | 2.203974  |
| 362 | 6 | 0 | -15.740608 | 7.041183  | 2.789945  |
| 363 | 6 | 0 | -16.298769 | 8.479269  | 2.920152  |
| 364 | 7 | 0 | -16.487461 | 6.092555  | 3.401808  |
| 365 | 7 | 0 | -15.763237 | 9.073286  | 4.157031  |
| 366 | 1 | 0 | -17.389535 | 8.438250  | 3.032818  |
| 367 | 6 | 0 | -15.938683 | 9.263709  | 1.687996  |
| 368 | 1 | 0 | -17.278876 | 6.404203  | 3.958236  |
| 369 | 6 | 0 | -16.065451 | 4.685762  | 3.484660  |
| 370 | 6 | 0 | -16.379924 | 8.845595  | 5.348519  |
| 371 | 1 | 0 | -14.820452 | 9.468741  | 4.119408  |
| 372 | 1 | 0 | -14.828065 | 9.338232  | 1.570399  |
| 373 | 1 | 0 | -16.352625 | 8.744402  | 0.789463  |
| 374 | 1 | 0 | -16.363868 | 10.295370 | 1.737199  |
| 375 | 6 | 0 | -16.985868 | 3.803818  | 2.597419  |
| 376 | 6 | 0 | -16.119257 | 4.134419  | 4.888236  |
| 377 | 1 | 0 | -15.035752 | 4.638059  | 3.114188  |
| 378 | 6 | 0 | -15.705606 | 9.477777  | 6.557470  |
| 379 | 8 | 0 | -17.425898 | 8.187840  | 5.451705  |
| 380 | 8 | 0 | -18.213730 | 3.889766  | 2.651828  |
| 381 | 7 | 0 | -16.313282 | 2.911114  | 1.814044  |
| 382 | 1 | 0 | -17.160455 | 4.161231  | 5.294877  |
| 383 | 1 | 0 | -15.770031 | 3.072767  | 4.877311  |
| 384 | 1 | 0 | -15.455233 | 4.719006  | 5.570383  |
| 385 | 1 | 0 | -16.383253 | 10.226060 | 6.982589  |

|     |   |   |            |           |           |
|-----|---|---|------------|-----------|-----------|
| 386 | 1 | 0 | -15.549035 | 8.705338  | 7.316942  |
| 387 | 1 | 0 | -14.751409 | 9.951018  | 6.308292  |
| 388 | 1 | 0 | -15.299895 | 2.989758  | 1.711816  |
| 389 | 6 | 0 | -17.036144 | 1.989507  | 0.935804  |
| 390 | 6 | 0 | -16.285177 | 0.640554  | 0.891226  |
| 391 | 1 | 0 | -18.034605 | 1.861702  | 1.373158  |
| 392 | 6 | 0 | -17.207553 | 2.470386  | -0.487684 |
| 393 | 8 | 0 | -15.046834 | 0.593216  | 0.889915  |
| 394 | 7 | 0 | -17.071001 | -0.459593 | 0.818166  |
| 395 | 1 | 0 | -16.219949 | 2.621541  | -0.987488 |
| 396 | 1 | 0 | -17.791060 | 1.715617  | -1.069171 |
| 397 | 1 | 0 | -17.764633 | 3.439229  | -0.503653 |
| 398 | 1 | 0 | -18.079578 | -0.368906 | 0.761856  |
| 399 | 6 | 0 | -16.527213 | -1.811614 | 0.637482  |
| 400 | 6 | 0 | -17.339944 | -2.515387 | -0.474274 |
| 401 | 1 | 0 | -15.481426 | -1.711628 | 0.331606  |
| 402 | 6 | 0 | -16.581535 | -2.668904 | 1.879527  |
| 403 | 8 | 0 | -18.547879 | -2.304102 | -0.616774 |
| 404 | 7 | 0 | -16.616016 | -3.395139 | -1.215124 |
| 405 | 1 | 0 | -17.632233 | -2.824145 | 2.225602  |
| 406 | 1 | 0 | -16.126971 | -3.665063 | 1.654774  |
| 407 | 1 | 0 | -16.000608 | -2.194362 | 2.708002  |
| 408 | 1 | 0 | -15.596888 | -3.392717 | -1.142911 |
| 409 | 6 | 0 | -17.234398 | -4.194331 | -2.273592 |
| 410 | 6 | 0 | -16.470018 | -5.532672 | -2.388769 |
| 411 | 1 | 0 | -18.274264 | -4.377878 | -1.973354 |
| 412 | 6 | 0 | -17.254245 | -3.539484 | -3.636249 |
| 413 | 8 | 0 | -15.268447 | -5.613351 | -2.093190 |
| 414 | 7 | 0 | -17.197971 | -6.573660 | -2.850044 |
| 415 | 1 | 0 | -17.804855 | -2.567574 | -3.587061 |
| 416 | 1 | 0 | -16.220390 | -3.341481 | -4.009961 |
| 417 | 1 | 0 | -17.776891 | -4.204459 | -4.366463 |
| 418 | 1 | 0 | -18.145880 | -6.427097 | -3.183814 |
| 419 | 6 | 0 | -16.601218 | -7.870185 | -3.198861 |
| 420 | 6 | 0 | -17.066032 | -8.232361 | -4.631049 |
| 421 | 1 | 0 | -15.513270 | -7.757025 | -3.173566 |
| 422 | 6 | 0 | -16.987712 | -8.994461 | -2.269422 |
| 423 | 8 | 0 | -18.190140 | -7.910540 | -5.029159 |
| 424 | 7 | 0 | -16.149574 | -8.929939 | -5.346124 |
| 425 | 1 | 0 | -16.695210 | -8.755776 | -1.217585 |
| 426 | 1 | 0 | -18.087676 | -9.187964 | -2.296311 |
| 427 | 1 | 0 | -16.451876 | -9.923841 | -2.583886 |
| 428 | 1 | 0 | -15.213240 | -9.027024 | -4.953743 |

|     |   |   |            |            |           |
|-----|---|---|------------|------------|-----------|
| 429 | 6 | 0 | -16.407484 | -9.388460  | -6.702273 |
| 430 | 1 | 0 | -16.190184 | -10.459311 | -6.796019 |
| 431 | 1 | 0 | -17.461228 | -9.213917  | -6.929277 |
| 432 | 1 | 0 | -15.795005 | -8.840935  | -7.430427 |
| 433 | 8 | 0 | -5.233590  | 7.034298   | 0.755814  |
| 434 | 6 | 0 | -6.447836  | 7.135193   | 0.993687  |
| 435 | 6 | 0 | -7.183315  | 8.476999   | 0.769186  |
| 436 | 7 | 0 | -7.229137  | 6.120306   | 1.424303  |
| 437 | 7 | 0 | -6.482421  | 9.538684   | 1.504998  |
| 438 | 1 | 0 | -8.197391  | 8.423332   | 1.178715  |
| 439 | 6 | 0 | -7.261155  | 8.711254   | -0.720960 |
| 440 | 1 | 0 | -8.202247  | 6.313721   | 1.681194  |
| 441 | 6 | 0 | -6.696560  | 4.771191   | 1.664138  |
| 442 | 6 | 0 | -7.132649  | 10.369990  | 2.357309  |
| 443 | 1 | 0 | -5.488848  | 9.693978   | 1.318718  |
| 444 | 1 | 0 | -6.240767  | 8.759223   | -1.174769 |
| 445 | 1 | 0 | -7.823104  | 7.870284   | -1.196012 |
| 446 | 1 | 0 | -7.796461  | 9.666220   | -0.942608 |
| 447 | 6 | 0 | -7.495172  | 3.745467   | 0.822143  |
| 448 | 6 | 0 | -6.782934  | 4.335880   | 3.107851  |
| 449 | 1 | 0 | -5.647459  | 4.777922   | 1.351294  |
| 450 | 6 | 0 | -6.262449  | 11.410987  | 3.044661  |
| 451 | 8 | 0 | -8.351194  | 10.301110  | 2.594249  |
| 452 | 8 | 0 | -8.733624  | 3.703105   | 0.879264  |
| 453 | 7 | 0 | -6.738531  | 2.908975   | 0.077712  |
| 454 | 1 | 0 | -7.844731  | 4.310756   | 3.457355  |
| 455 | 1 | 0 | -6.349603  | 3.311017   | 3.209716  |
| 456 | 1 | 0 | -6.207759  | 5.032482   | 3.764877  |
| 457 | 1 | 0 | -6.713012  | 12.396443  | 2.888197  |
| 458 | 1 | 0 | -6.273065  | 11.211630  | 4.122022  |
| 459 | 1 | 0 | -5.233011  | 11.406107  | 2.678388  |
| 460 | 1 | 0 | -5.727248  | 3.060075   | 0.032268  |
| 461 | 6 | 0 | -7.325245  | 1.828503   | -0.730062 |
| 462 | 6 | 0 | -6.683991  | 0.488607   | -0.296781 |
| 463 | 1 | 0 | -8.400856  | 1.818702   | -0.525405 |
| 464 | 6 | 0 | -7.100496  | 1.988732   | -2.214145 |
| 465 | 8 | 0 | -5.449675  | 0.355510   | -0.294823 |
| 466 | 7 | 0 | -7.555864  | -0.482403  | 0.048759  |
| 467 | 1 | 0 | -6.009372  | 1.984333   | -2.458119 |
| 468 | 1 | 0 | -7.589618  | 1.141154   | -2.753558 |
| 469 | 1 | 0 | -7.543780  | 2.946692   | -2.579550 |
| 470 | 1 | 0 | -8.558439  | -0.272271  | 0.071349  |
| 471 | 6 | 0 | -7.110518  | -1.819384  | 0.474627  |



|     |   |   |            |            |           |
|-----|---|---|------------|------------|-----------|
| 472 | 6 | 0 | -7.739767  | -2.873947  | -0.466629 |
| 473 | 1 | 0 | -6.019002  | -1.837081  | 0.390875  |
| 474 | 6 | 0 | -7.513352  | -2.166009  | 1.887481  |
| 475 | 8 | 0 | -8.970448  | -2.934116  | -0.606137 |
| 476 | 7 | 0 | -6.861635  | -3.694713  | -1.082781 |
| 477 | 1 | 0 | -8.626250  | -2.169869  | 1.997600  |
| 478 | 1 | 0 | -7.127380  | -3.183594  | 2.140620  |
| 479 | 1 | 0 | -7.085508  | -1.432005  | 2.612577  |
| 480 | 1 | 0 | -5.857902  | -3.546419  | -0.948066 |
| 481 | 6 | 0 | -7.296738  | -4.755103  | -2.004552 |
| 482 | 6 | 0 | -6.825483  | -6.124334  | -1.458342 |
| 483 | 1 | 0 | -8.390882  | -4.720792  | -2.042221 |
| 484 | 6 | 0 | -6.742024  | -4.603673  | -3.400374 |
| 485 | 8 | 0 | -5.630794  | -6.322139  | -1.185059 |
| 486 | 7 | 0 | -7.797784  | -7.053010  | -1.332392 |
| 487 | 1 | 0 | -7.056924  | -3.629687  | -3.847477 |
| 488 | 1 | 0 | -5.624785  | -4.649663  | -3.395786 |
| 489 | 1 | 0 | -7.130051  | -5.432129  | -4.042112 |
| 490 | 1 | 0 | -8.766722  | -6.795556  | -1.539980 |
| 491 | 6 | 0 | -7.518264  | -8.418267  | -0.858324 |
| 492 | 6 | 0 | -7.773207  | -9.418030  | -2.011919 |
| 493 | 1 | 0 | -6.462376  | -8.441580  | -0.565893 |
| 494 | 6 | 0 | -8.375598  | -8.829468  | 0.312907  |
| 495 | 8 | 0 | -8.889396  | -9.501068  | -2.550155 |
| 496 | 7 | 0 | -6.719059  | -10.176847 | -2.366202 |
| 497 | 1 | 0 | -8.226505  | -8.138069  | 1.177415  |
| 498 | 1 | 0 | -9.459333  | -8.825911  | 0.036000  |
| 499 | 1 | 0 | -8.094080  | -9.863262  | 0.629977  |
| 500 | 1 | 0 | -5.809896  | -10.023711 | -1.924546 |
| 501 | 6 | 0 | -6.813202  | -11.165727 | -3.430313 |
| 502 | 1 | 0 | -5.963844  | -11.849294 | -3.350649 |
| 503 | 1 | 0 | -7.745024  | -11.731945 | -3.337905 |
| 504 | 1 | 0 | -6.797381  | -10.695186 | -4.422209 |
| 505 | 8 | 0 | -9.847067  | 6.968015   | 2.130663  |
| 506 | 6 | 0 | -11.085074 | 7.062529   | 2.110578  |
| 507 | 6 | 0 | -11.757707 | 8.435491   | 1.860186  |
| 508 | 7 | 0 | -11.927329 | 6.019770   | 2.273506  |
| 509 | 7 | 0 | -11.140934 | 9.438668   | 2.740023  |
| 510 | 1 | 0 | -12.821677 | 8.386778   | 2.114289  |
| 511 | 6 | 0 | -11.614362 | 8.752256   | 0.390672  |
| 512 | 1 | 0 | -12.939701 | 6.184427   | 2.278817  |
| 513 | 6 | 0 | -11.432441 | 4.657755   | 2.544721  |
| 514 | 6 | 0 | -11.843523 | 10.114997  | 3.680998  |

|     |   |   |            |           |           |
|-----|---|---|------------|-----------|-----------|
| 515 | 1 | 0 | -10.142622 | 9.634373  | 2.630879  |
| 516 | 1 | 0 | -10.537798 | 8.798766  | 0.091299  |
| 517 | 1 | 0 | -12.117511 | 7.953166  | -0.207025 |
| 518 | 1 | 0 | -12.094119 | 9.731722  | 0.149522  |
| 519 | 6 | 0 | -12.235762 | 3.665540  | 1.674617  |
| 520 | 6 | 0 | -11.583047 | 4.230968  | 3.985742  |
| 521 | 1 | 0 | -10.372790 | 4.639792  | 2.271114  |
| 522 | 6 | 0 | -11.035462 | 11.100090 | 4.511934  |
| 523 | 8 | 0 | -13.060664 | 9.959404  | 3.880639  |
| 524 | 8 | 0 | -13.466449 | 3.580879  | 1.789517  |
| 525 | 7 | 0 | -11.498580 | 2.915750  | 0.822283  |
| 526 | 1 | 0 | -12.659323 | 4.212954  | 4.288712  |
| 527 | 1 | 0 | -11.162340 | 3.203354  | 4.110069  |
| 528 | 1 | 0 | -11.031122 | 4.926314  | 4.663502  |
| 529 | 1 | 0 | -11.509891 | 12.084303 | 4.438715  |
| 530 | 1 | 0 | -11.084223 | 10.788933 | 5.561226  |
| 531 | 1 | 0 | -9.992249  | 11.163485 | 4.192979  |
| 532 | 1 | 0 | -10.492579 | 3.085826  | 0.748221  |
| 533 | 6 | 0 | -12.126875 | 1.932496  | -0.072294 |
| 534 | 6 | 0 | -11.492133 | 0.542768  | 0.167143  |
| 535 | 1 | 0 | -13.191571 | 1.912313  | 0.182058  |
| 536 | 6 | 0 | -11.969420 | 2.257845  | -1.538521 |
| 537 | 8 | 0 | -10.262644 | 0.389232  | 0.099570  |
| 538 | 7 | 0 | -12.372434 | -0.453505 | 0.412197  |
| 539 | 1 | 0 | -10.891130 | 2.274538  | -1.833284 |
| 540 | 1 | 0 | -12.492652 | 1.479787  | -2.146316 |
| 541 | 1 | 0 | -12.418667 | 3.253530  | -1.772187 |
| 542 | 1 | 0 | -13.359473 | -0.218122 | 0.544838  |
| 543 | 6 | 0 | -11.947591 | -1.849851 | 0.607947  |
| 544 | 6 | 0 | -12.565465 | -2.731071 | -0.508353 |
| 545 | 1 | 0 | -10.854460 | -1.865580 | 0.541391  |
| 546 | 6 | 0 | -12.382714 | -2.425543 | 1.933751  |
| 547 | 8 | 0 | -13.788588 | -2.719504 | -0.713273 |
| 548 | 7 | 0 | -11.688644 | -3.504572 | -1.189000 |
| 549 | 1 | 0 | -13.498800 | -2.439677 | 2.018806  |
| 550 | 1 | 0 | -12.006612 | -3.474177 | 2.020420  |
| 551 | 1 | 0 | -11.968549 | -1.827166 | 2.781130  |
| 552 | 1 | 0 | -10.684634 | -3.387250 | -1.027411 |
| 553 | 6 | 0 | -12.128529 | -4.370441 | -2.293875 |
| 554 | 6 | 0 | -11.633819 | -5.817262 | -2.056880 |
| 555 | 1 | 0 | -13.222704 | -4.341047 | -2.297441 |
| 556 | 6 | 0 | -11.614551 | -3.935241 | -3.645967 |
| 557 | 8 | 0 | -10.430185 | -6.062003 | -1.880077 |

|     |   |   |            |            |           |
|-----|---|---|------------|------------|-----------|
| 558 | 7 | 0 | -12.602067 | -6.759833  | -2.101334 |
| 559 | 1 | 0 | -11.953706 | -2.897492  | -3.882042 |
| 560 | 1 | 0 | -10.497203 | -3.961930  | -3.678058 |
| 561 | 1 | 0 | -12.009626 | -4.625777  | -4.430614 |
| 562 | 1 | 0 | -13.579628 | -6.462167  | -2.159252 |
| 563 | 6 | 0 | -12.307559 | -8.198824  | -1.984444 |
| 564 | 6 | 0 | -12.484470 | -8.878703  | -3.368284 |
| 565 | 1 | 0 | -11.264612 | -8.284947  | -1.657832 |
| 566 | 6 | 0 | -13.205889 | -8.907264  | -1.001848 |
| 567 | 8 | 0 | -13.580322 | -8.868389  | -3.954181 |
| 568 | 7 | 0 | -11.384853 | -9.472831  | -3.866753 |
| 569 | 1 | 0 | -13.129764 | -8.446595  | 0.012886  |
| 570 | 1 | 0 | -14.274858 | -8.866192  | -1.333784 |
| 571 | 1 | 0 | -12.899270 | -9.979443  | -0.930647 |
| 572 | 1 | 0 | -10.502228 | -9.434064  | -3.352887 |
| 573 | 6 | 0 | -11.407043 | -10.152749 | -5.154028 |
| 574 | 1 | 0 | -10.427717 | -10.607387 | -5.322334 |
| 575 | 1 | 0 | -12.175159 | -10.934255 | -5.171181 |
| 576 | 1 | 0 | -11.621536 | -9.451593  | -5.969604 |

P PI (Ac-AAAAAA-NHMe),

|    |   |   |          |           |           |
|----|---|---|----------|-----------|-----------|
| 1  | 6 | 0 | 5.307564 | 11.628441 | -0.554548 |
| 2  | 6 | 0 | 4.528703 | 10.398046 | -0.994715 |
| 3  | 1 | 0 | 4.855987 | 12.509411 | -1.022363 |
| 4  | 1 | 0 | 5.196191 | 11.738298 | 0.529766  |
| 5  | 1 | 0 | 6.367665 | 11.570156 | -0.813306 |
| 6  | 8 | 0 | 3.298818 | 10.328429 | -0.830185 |
| 7  | 7 | 0 | 5.272250 | 9.410627  | -1.553028 |
| 8  | 1 | 0 | 6.275455 | 9.556612  | -1.687690 |
| 9  | 6 | 0 | 4.674479 | 8.154237  | -2.026073 |
| 10 | 6 | 0 | 5.376897 | 6.968651  | -1.323127 |
| 11 | 6 | 0 | 4.802351 | 7.941692  | -3.515789 |
| 12 | 1 | 0 | 3.614052 | 8.182409  | -1.753635 |
| 13 | 8 | 0 | 6.611978 | 6.850545  | -1.368491 |
| 14 | 7 | 0 | 4.551464 | 6.096890  | -0.703354 |
| 15 | 1 | 0 | 4.308267 | 8.771266  | -4.077184 |
| 16 | 1 | 0 | 5.875923 | 7.891513  | -3.823813 |
| 17 | 1 | 0 | 4.306783 | 6.979437  | -3.793351 |
| 18 | 1 | 0 | 3.549202 | 6.304058  | -0.653048 |
| 19 | 6 | 0 | 5.060608 | 4.907633  | -0.002673 |
| 20 | 6 | 0 | 4.375890 | 3.648446  | -0.585192 |
| 21 | 6 | 0 | 4.796687 | 4.923371  | 1.484063  |
| 22 | 1 | 0 | 6.140337 | 4.868402  | -0.179701 |
| 23 | 8 | 0 | 3.139109 | 3.562777  | -0.615692 |
| 24 | 7 | 0 | 5.216595 | 2.682015  | -1.014510 |
| 25 | 1 | 0 | 3.699010 | 4.949002  | 1.696399  |
| 26 | 1 | 0 | 5.226859 | 4.000389  | 1.943918  |
| 27 | 1 | 0 | 5.273075 | 5.814224  | 1.960601  |
| 28 | 1 | 0 | 6.225091 | 2.856983  | -1.008806 |
| 29 | 6 | 0 | 4.729031 | 1.401368  | -1.551675 |
| 30 | 6 | 0 | 5.333468 | 0.255265  | -0.706451 |
| 31 | 6 | 0 | 5.111748 | 1.164243  | -2.992268 |
| 32 | 1 | 0 | 3.637946 | 1.407312  | -1.459937 |
| 33 | 8 | 0 | 6.563974 | 0.159426  | -0.570550 |
| 34 | 7 | 0 | 4.438950 | -0.599376 | -0.166426 |
| 35 | 1 | 0 | 4.702685 | 1.970818  | -3.647839 |
| 36 | 1 | 0 | 6.222988 | 1.134900  | -3.112872 |
| 37 | 1 | 0 | 4.691239 | 0.184812  | -3.327659 |
| 38 | 1 | 0 | 3.437331 | -0.408728 | -0.272039 |
| 39 | 6 | 0 | 4.854333 | -1.734579 | 0.671914  |
| 40 | 6 | 0 | 4.281751 | -3.042083 | 0.075155  |
| 41 | 6 | 0 | 4.371678 | -1.637991 | 2.099740  |

|    |   |   |           |            |           |
|----|---|---|-----------|------------|-----------|
| 42 | 1 | 0 | 5.948595  | -1.760805  | 0.660116  |
| 43 | 8 | 0 | 3.066886  | -3.154922  | -0.146723 |
| 44 | 7 | 0 | 5.187996  | -4.019890  | -0.143252 |
| 45 | 1 | 0 | 4.762767  | -0.712244  | 2.587272  |
| 46 | 1 | 0 | 3.254429  | -1.621044  | 2.145671  |
| 47 | 1 | 0 | 4.738214  | -2.524350  | 2.672896  |
| 48 | 1 | 0 | 6.180610  | -3.823130  | 0.009039  |
| 49 | 6 | 0 | 4.801808  | -5.342971  | -0.658590 |
| 50 | 6 | 0 | 5.239149  | -6.418655  | 0.363764  |
| 51 | 6 | 0 | 5.433883  | -5.683524  | -1.986024 |
| 52 | 1 | 0 | 3.711658  | -5.340567  | -0.764031 |
| 53 | 8 | 0 | 6.423821  | -6.498218  | 0.726821  |
| 54 | 7 | 0 | 4.254615  | -7.235023  | 0.795629  |
| 55 | 1 | 0 | 5.150356  | -4.932934  | -2.763178 |
| 56 | 1 | 0 | 6.548789  | -5.709939  | -1.904912 |
| 57 | 1 | 0 | 5.077277  | -6.689955  | -2.315682 |
| 58 | 1 | 0 | 3.292176  | -7.070916  | 0.485844  |
| 59 | 6 | 0 | 4.505309  | -8.323322  | 1.755798  |
| 60 | 6 | 0 | 4.253388  | -9.681170  | 1.056763  |
| 61 | 6 | 0 | 3.626152  | -8.254052  | 2.979318  |
| 62 | 1 | 0 | 5.556696  | -8.243407  | 2.054064  |
| 63 | 8 | 0 | 3.129208  | -9.981155  | 0.621895  |
| 64 | 7 | 0 | 5.325837  | -10.489248 | 0.959704  |
| 65 | 1 | 0 | 3.887144  | -9.094465  | 3.667894  |
| 66 | 1 | 0 | 3.773791  | -7.289005  | 3.521951  |
| 67 | 1 | 0 | 2.546502  | -8.346007  | 2.701423  |
| 68 | 1 | 0 | 6.231940  | -10.181348 | 1.318247  |
| 69 | 6 | 0 | 5.238967  | -11.795370 | 0.321934  |
| 70 | 1 | 0 | 6.200120  | -12.302289 | 0.436754  |
| 71 | 1 | 0 | 4.453412  | -12.403433 | 0.784346  |
| 72 | 1 | 0 | 5.009342  | -11.701515 | -0.746518 |
| 73 | 8 | 0 | 7.896166  | -9.781712  | 1.971352  |
| 74 | 6 | 0 | 8.986980  | -9.409547  | 2.433811  |
| 75 | 7 | 0 | 10.062055 | -10.213629 | 2.539373  |
| 76 | 6 | 0 | 9.191157  | -7.959847  | 2.937318  |
| 77 | 1 | 0 | 10.939452 | -9.845228  | 2.911045  |
| 78 | 6 | 0 | 10.018612 | -11.604524 | 2.110227  |
| 79 | 6 | 0 | 8.243385  | -7.724766  | 4.086868  |
| 80 | 1 | 0 | 10.223147 | -7.824301  | 3.279826  |
| 81 | 7 | 0 | 8.988105  | -7.024837  | 1.817658  |
| 82 | 1 | 0 | 10.943004 | -12.094887 | 2.425027  |
| 83 | 1 | 0 | 9.164082  | -12.121284 | 2.560220  |
| 84 | 1 | 0 | 9.926377  | -11.683457 | 1.019847  |

|     |   |   |           |           |           |
|-----|---|---|-----------|-----------|-----------|
| 85  | 1 | 0 | 8.467596  | -8.453774 | 4.903501  |
| 86  | 1 | 0 | 8.356548  | -6.689811 | 4.491436  |
| 87  | 1 | 0 | 7.181540  | -7.868247 | 3.765519  |
| 88  | 1 | 0 | 8.039256  | -6.904479 | 1.450175  |
| 89  | 6 | 0 | 9.994417  | -6.284145 | 1.309666  |
| 90  | 8 | 0 | 11.166312 | -6.319485 | 1.720160  |
| 91  | 6 | 0 | 9.606357  | -5.351025 | 0.138839  |
| 92  | 6 | 0 | 10.299308 | -5.851615 | -1.104488 |
| 93  | 1 | 0 | 8.522302  | -5.365818 | -0.016395 |
| 94  | 7 | 0 | 9.971399  | -3.972405 | 0.503710  |
| 95  | 1 | 0 | 10.055568 | -5.203777 | -1.981222 |
| 96  | 1 | 0 | 11.409007 | -5.865415 | -0.967867 |
| 97  | 1 | 0 | 9.955172  | -6.892010 | -1.323472 |
| 98  | 1 | 0 | 10.955442 | -3.754714 | 0.678383  |
| 99  | 6 | 0 | 9.056588  | -2.979722 | 0.567618  |
| 100 | 8 | 0 | 7.852112  | -3.125035 | 0.312609  |
| 101 | 6 | 0 | 9.605056  | -1.607030 | 1.024531  |
| 102 | 6 | 0 | 9.061180  | -1.338921 | 2.407712  |
| 103 | 1 | 0 | 10.698757 | -1.629748 | 1.062616  |
| 104 | 7 | 0 | 9.226804  | -0.584176 | 0.037211  |
| 105 | 1 | 0 | 9.429868  | -0.357916 | 2.794156  |
| 106 | 1 | 0 | 9.403337  | -2.145942 | 3.100601  |
| 107 | 1 | 0 | 7.942954  | -1.323354 | 2.403346  |
| 108 | 1 | 0 | 8.230474  | -0.412747 | -0.133023 |
| 109 | 6 | 0 | 10.143702 | 0.199675  | -0.568381 |
| 110 | 8 | 0 | 11.368331 | 0.122589  | -0.376856 |
| 111 | 6 | 0 | 9.574031  | 1.235690  | -1.566147 |
| 112 | 6 | 0 | 10.014699 | 0.833342  | -2.952431 |
| 113 | 1 | 0 | 8.480066  | 1.247457  | -1.519597 |
| 114 | 7 | 0 | 10.038874 | 2.573397  | -1.164519 |
| 115 | 1 | 0 | 9.632686  | 1.555664  | -3.714011 |
| 116 | 1 | 0 | 9.607923  | -0.180526 | -3.187447 |
| 117 | 1 | 0 | 11.129925 | 0.795076  | -3.023940 |
| 118 | 1 | 0 | 11.045586 | 2.754407  | -1.145710 |
| 119 | 6 | 0 | 9.180417  | 3.577321  | -0.879148 |
| 120 | 8 | 0 | 7.946074  | 3.478218  | -0.936886 |
| 121 | 6 | 0 | 9.841288  | 4.903377  | -0.432235 |
| 122 | 6 | 0 | 9.545125  | 5.088191  | 1.036714  |
| 123 | 1 | 0 | 10.924907 | 4.856513  | -0.581764 |
| 124 | 7 | 0 | 9.336825  | 5.999145  | -1.274192 |
| 125 | 1 | 0 | 8.442913  | 5.125031  | 1.222236  |
| 126 | 1 | 0 | 9.974220  | 4.229953  | 1.609207  |
| 127 | 1 | 0 | 10.002152 | 6.034048  | 1.416400  |

|     |   |   |           |            |           |
|-----|---|---|-----------|------------|-----------|
| 128 | 6 | 0 | 10.161262 | 6.764807   | -2.021292 |
| 129 | 1 | 0 | 8.335260  | 6.214562   | -1.251675 |
| 130 | 6 | 0 | 9.462809  | 7.868580   | -2.850910 |
| 131 | 8 | 0 | 11.393332 | 6.617359   | -2.077027 |
| 132 | 7 | 0 | 10.054944 | 9.168104   | -2.502305 |
| 133 | 6 | 0 | 9.606739  | 7.505614   | -4.309477 |
| 134 | 1 | 0 | 8.399838  | 7.922769   | -2.592371 |
| 135 | 1 | 0 | 11.056453 | 9.304572   | -2.655759 |
| 136 | 6 | 0 | 9.308665  | 10.206135  | -2.048608 |
| 137 | 1 | 0 | 9.119035  | 8.273082   | -4.958022 |
| 138 | 1 | 0 | 10.683761 | 7.424964   | -4.598676 |
| 139 | 1 | 0 | 9.114200  | 6.519568   | -4.492974 |
| 140 | 8 | 0 | 8.078804  | 10.152904  | -1.881541 |
| 141 | 6 | 0 | 10.086368 | 11.474141  | -1.729335 |
| 142 | 1 | 0 | 9.620717  | 12.309452  | -2.262194 |
| 143 | 1 | 0 | 9.993536  | 11.675445  | -0.656375 |
| 144 | 1 | 0 | 11.142538 | 11.399599  | -1.999697 |
| 145 | 8 | 0 | 12.549573 | -9.316592  | 3.637325  |
| 146 | 6 | 0 | 13.581459 | -8.852329  | 4.147852  |
| 147 | 6 | 0 | 13.755187 | -7.328389  | 4.354476  |
| 148 | 7 | 0 | 14.606486 | -9.613968  | 4.578293  |
| 149 | 7 | 0 | 13.620912 | -6.633387  | 3.063299  |
| 150 | 6 | 0 | 12.743203 | -6.881492  | 5.380673  |
| 151 | 1 | 0 | 14.763914 | -7.111912  | 4.722277  |
| 152 | 1 | 0 | 15.454389 | -9.177744  | 4.944967  |
| 153 | 6 | 0 | 14.574704 | -11.066925 | 4.475186  |
| 154 | 1 | 0 | 12.700019 | -6.610577  | 2.613096  |
| 155 | 6 | 0 | 14.638474 | -5.933475  | 2.522987  |
| 156 | 1 | 0 | 12.918528 | -7.434057  | 6.336022  |
| 157 | 1 | 0 | 12.835516 | -5.786342  | 5.580295  |
| 158 | 1 | 0 | 11.701176 | -7.093946  | 5.033952  |
| 159 | 1 | 0 | 15.402994 | -11.475280 | 5.059153  |
| 160 | 1 | 0 | 13.629480 | -11.456659 | 4.866400  |
| 161 | 1 | 0 | 14.673836 | -11.397469 | 3.433543  |
| 162 | 6 | 0 | 14.339407 | -5.241687  | 1.172420  |
| 163 | 8 | 0 | 15.764264 | -5.830978  | 3.036386  |
| 164 | 7 | 0 | 14.730690 | -3.827022  | 1.283118  |
| 165 | 6 | 0 | 15.078628 | -5.990076  | 0.091217  |
| 166 | 1 | 0 | 13.264643 | -5.265961  | 0.963620  |
| 167 | 6 | 0 | 13.825323 | -2.825341  | 1.210994  |
| 168 | 1 | 0 | 15.715573 | -3.603864  | 1.433990  |
| 169 | 1 | 0 | 14.895845 | -5.524133  | -0.907526 |
| 170 | 1 | 0 | 16.179788 | -5.995304  | 0.285597  |

|     |   |   |           |           |           |
|-----|---|---|-----------|-----------|-----------|
| 171 | 1 | 0 | 14.716619 | -7.047015 | 0.062787  |
| 172 | 6 | 0 | 14.388211 | -1.410664 | 1.478291  |
| 173 | 8 | 0 | 12.619629 | -2.994468 | 0.980265  |
| 174 | 7 | 0 | 14.020959 | -0.523187 | 0.364619  |
| 175 | 6 | 0 | 13.855920 | -0.956665 | 2.816833  |
| 176 | 1 | 0 | 15.481888 | -1.437659 | 1.515976  |
| 177 | 6 | 0 | 14.950859 | 0.194698  | -0.300566 |
| 178 | 1 | 0 | 13.027154 | -0.380976 | 0.154919  |
| 179 | 1 | 0 | 14.235414 | 0.063641  | 3.067221  |
| 180 | 1 | 0 | 12.737993 | -0.931211 | 2.816377  |
| 181 | 1 | 0 | 14.195770 | -1.667332 | 3.609228  |
| 182 | 6 | 0 | 14.410390 | 1.076177  | -1.453765 |
| 183 | 8 | 0 | 16.167687 | 0.155455  | -0.052851 |
| 184 | 7 | 0 | 14.875126 | 2.460643  | -1.265846 |
| 185 | 6 | 0 | 14.872845 | 0.459897  | -2.751937 |
| 186 | 1 | 0 | 13.315635 | 1.098981  | -1.428727 |
| 187 | 6 | 0 | 14.012842 | 3.491655  | -1.105807 |
| 188 | 1 | 0 | 15.874693 | 2.655215  | -1.354018 |
| 189 | 1 | 0 | 14.509886 | 1.055595  | -3.624375 |
| 190 | 1 | 0 | 15.989699 | 0.405988  | -2.796132 |
| 191 | 1 | 0 | 14.463163 | -0.576526 | -2.833666 |
| 192 | 6 | 0 | 14.670805 | 4.872627  | -0.878244 |
| 193 | 8 | 0 | 12.779621 | 3.374104  | -1.104392 |
| 194 | 7 | 0 | 14.133415 | 5.830201  | -1.857983 |
| 195 | 6 | 0 | 14.418757 | 5.266221  | 0.557618  |
| 196 | 1 | 0 | 15.749792 | 4.815743  | -1.053434 |
| 197 | 6 | 0 | 14.949462 | 6.564703  | -2.646261 |
| 198 | 1 | 0 | 13.124357 | 6.010001  | -1.871583 |
| 199 | 1 | 0 | 13.322688 | 5.322986  | 0.771518  |
| 200 | 1 | 0 | 14.874431 | 4.502938  | 1.234504  |
| 201 | 1 | 0 | 14.877508 | 6.259880  | 0.781106  |
| 202 | 6 | 0 | 14.231393 | 7.497166  | -3.654626 |
| 203 | 8 | 0 | 16.189268 | 6.488529  | -2.622958 |
| 204 | 7 | 0 | 14.797563 | 8.851893  | -3.581830 |
| 205 | 1 | 0 | 13.170140 | 7.581296  | -3.395920 |
| 206 | 6 | 0 | 14.365563 | 6.862820  | -5.019276 |
| 207 | 6 | 0 | 14.044315 | 9.931846  | -3.247992 |
| 208 | 1 | 0 | 15.763731 | 9.002518  | -3.875809 |
| 209 | 1 | 0 | 15.441660 | 6.738282  | -5.301368 |
| 210 | 1 | 0 | 13.882553 | 5.855251  | -5.005299 |
| 211 | 1 | 0 | 13.862829 | 7.486768  | -5.797402 |
| 212 | 6 | 0 | 14.779676 | 11.263021 | -3.235569 |
| 213 | 8 | 0 | 12.840611 | 9.865507  | -2.952288 |



|     |   |   |           |            |           |
|-----|---|---|-----------|------------|-----------|
| 214 | 1 | 0 | 14.206584 | 11.979106  | -3.833008 |
| 215 | 1 | 0 | 14.799950 | 11.635925  | -2.205444 |
| 216 | 1 | 0 | 15.799778 | 11.188008  | -3.619396 |
| 217 | 1 | 0 | 17.309379 | -5.811172  | 3.856585  |
| 218 | 7 | 0 | 18.228603 | -5.912082  | 4.296769  |
| 219 | 6 | 0 | 19.353385 | -5.753849  | 3.561644  |
| 220 | 6 | 0 | 18.282922 | -6.497421  | 5.648854  |
| 221 | 6 | 0 | 19.115922 | -5.192789  | 2.137842  |
| 222 | 8 | 0 | 20.494428 | -6.014372  | 3.973473  |
| 223 | 6 | 0 | 18.234918 | -8.040754  | 5.504921  |
| 224 | 6 | 0 | 17.165328 | -6.035919  | 6.541478  |
| 225 | 1 | 0 | 19.247305 | -6.205404  | 6.083340  |
| 226 | 7 | 0 | 19.556304 | -3.784920  | 2.095233  |
| 227 | 6 | 0 | 19.837980 | -6.075455  | 1.152659  |
| 228 | 1 | 0 | 18.044448 | -5.179627  | 1.909658  |
| 229 | 8 | 0 | 17.179432 | -8.688392  | 5.568186  |
| 230 | 7 | 0 | 19.447886 | -8.596923  | 5.261593  |
| 231 | 1 | 0 | 17.273621 | -6.522559  | 7.541813  |
| 232 | 1 | 0 | 17.194272 | -4.927110  | 6.674289  |
| 233 | 1 | 0 | 16.168816 | -6.320628  | 6.121140  |
| 234 | 6 | 0 | 18.715551 | -2.755556  | 1.809485  |
| 235 | 1 | 0 | 20.539157 | -3.594553  | 2.246423  |
| 236 | 1 | 0 | 19.718618 | -5.691981  | 0.110279  |
| 237 | 1 | 0 | 20.928775 | -6.137758  | 1.391243  |
| 238 | 1 | 0 | 19.408841 | -7.106219  | 1.202778  |
| 239 | 1 | 0 | 20.206652 | -7.951610  | 5.052182  |
| 240 | 6 | 0 | 19.616529 | -10.010154 | 4.953034  |
| 241 | 6 | 0 | 19.360337 | -1.350008  | 1.832868  |
| 242 | 8 | 0 | 17.512134 | -2.904292  | 1.571275  |
| 243 | 1 | 0 | 20.600299 | -10.344481 | 5.296295  |
| 244 | 1 | 0 | 18.842079 | -10.579119 | 5.471895  |
| 245 | 1 | 0 | 19.530538 | -10.207138 | 3.876032  |
| 246 | 7 | 0 | 18.868189 | -0.590996  | 0.680531  |
| 247 | 6 | 0 | 19.059741 | -0.726636  | 3.175797  |
| 248 | 1 | 0 | 20.449514 | -1.413281  | 1.715707  |
| 249 | 6 | 0 | 19.702978 | 0.166746   | -0.082272 |
| 250 | 1 | 0 | 17.858733 | -0.511144  | 0.536520  |
| 251 | 1 | 0 | 19.522230 | 0.288047   | 3.247700  |
| 252 | 1 | 0 | 19.483254 | -1.368505  | 3.986433  |
| 253 | 1 | 0 | 17.958608 | -0.627101  | 3.338656  |
| 254 | 6 | 0 | 19.008755 | 0.837829   | -1.290779 |
| 255 | 8 | 0 | 20.915052 | 0.293981   | 0.112100  |
| 256 | 7 | 0 | 19.611570 | 2.161596   | -1.498952 |

|     |   |   |           |           |           |
|-----|---|---|-----------|-----------|-----------|
| 257 | 6 | 0 | 19.137980 | -0.086705 | -2.477766 |
| 258 | 1 | 0 | 17.945745 | 0.989982  | -1.080953 |
| 259 | 6 | 0 | 18.872579 | 3.287277  | -1.642486 |
| 260 | 1 | 0 | 20.621730 | 2.216871  | -1.431706 |
| 261 | 1 | 0 | 18.636133 | 0.353685  | -3.373909 |
| 262 | 1 | 0 | 18.641799 | -1.059102 | -2.237512 |
| 263 | 1 | 0 | 20.208352 | -0.283885 | -2.729814 |
| 264 | 6 | 0 | 19.678585 | 4.602092  | -1.747540 |
| 265 | 8 | 0 | 17.635078 | 3.296031  | -1.667192 |
| 266 | 7 | 0 | 18.960041 | 5.515355  | -2.638173 |
| 267 | 6 | 0 | 19.905399 | 5.126772  | -0.348549 |
| 268 | 1 | 0 | 20.657958 | 4.419418  | -2.207830 |
| 269 | 1 | 0 | 17.952059 | 5.633093  | -2.513410 |
| 270 | 6 | 0 | 19.615047 | 6.319407  | -3.514382 |
| 271 | 1 | 0 | 18.938109 | 5.333597  | 0.170922  |
| 272 | 1 | 0 | 20.475247 | 4.370811  | 0.245111  |
| 273 | 1 | 0 | 20.499034 | 6.073213  | -0.380452 |
| 274 | 6 | 0 | 18.682034 | 7.151169  | -4.424604 |
| 275 | 8 | 0 | 20.843784 | 6.381206  | -3.631249 |
| 276 | 7 | 0 | 19.360963 | 8.418930  | -4.713023 |
| 277 | 6 | 0 | 18.351882 | 6.327957  | -5.647053 |
| 278 | 1 | 0 | 17.748140 | 7.376719  | -3.900639 |
| 279 | 6 | 0 | 18.723888 | 9.615751  | -4.691724 |
| 280 | 1 | 0 | 20.371003 | 8.369884  | -4.785238 |
| 281 | 1 | 0 | 17.696596 | 6.906845  | -6.343193 |
| 282 | 1 | 0 | 17.801721 | 5.408671  | -5.327663 |
| 283 | 1 | 0 | 19.273877 | 6.022240  | -6.198373 |
| 284 | 6 | 0 | 19.600558 | 10.839391 | -4.912865 |
| 285 | 8 | 0 | 17.502636 | 9.731320  | -4.506595 |
| 286 | 1 | 0 | 19.228170 | 11.382548 | -5.787207 |
| 287 | 1 | 0 | 19.502450 | 11.500761 | -4.046139 |
| 288 | 1 | 0 | 20.656713 | 10.595978 | -5.063024 |
| 289 | 8 | 0 | 1.827574  | 6.967152  | -0.657327 |
| 290 | 6 | 0 | 0.594846  | 7.078726  | -0.561248 |
| 291 | 6 | 0 | -0.125185 | 8.332207  | -1.112119 |
| 292 | 7 | 0 | -0.214157 | 6.145749  | -0.012729 |
| 293 | 7 | 0 | 0.493140  | 9.532410  | -0.530984 |
| 294 | 1 | 0 | -1.175690 | 8.332875  | -0.802289 |
| 295 | 6 | 0 | -0.048846 | 8.276493  | -2.619375 |
| 296 | 1 | 0 | -1.213665 | 6.346138  | 0.090599  |
| 297 | 6 | 0 | 0.312098  | 4.890651  | 0.546261  |
| 298 | 6 | 0 | -0.229345 | 10.458482 | 0.147352  |
| 299 | 1 | 0 | 1.493035  | 9.689710  | -0.677360 |

|     |   |   |           |           |           |
|-----|---|---|-----------|-----------|-----------|
| 300 | 1 | 0 | 1.013297  | 8.257947  | -2.967686 |
| 301 | 1 | 0 | -0.557729 | 7.348840  | -2.978670 |
| 302 | 1 | 0 | -0.558204 | 9.160522  | -3.073828 |
| 303 | 6 | 0 | -0.404640 | 3.698782  | -0.131179 |
| 304 | 6 | 0 | 0.105031  | 4.759610  | 2.036421  |
| 305 | 1 | 0 | 1.383946  | 4.864147  | 0.325171  |
| 306 | 6 | 0 | 0.565273  | 11.639285 | 0.684121  |
| 307 | 8 | 0 | -1.453901 | 10.372209 | 0.342069  |
| 308 | 8 | 0 | -1.642672 | 3.623950  | -0.124604 |
| 309 | 7 | 0 | 0.410131  | 2.773087  | -0.682637 |
| 310 | 1 | 0 | -0.983416 | 4.769402  | 2.292731  |
| 311 | 1 | 0 | 0.544393  | 3.793340  | 2.385299  |
| 312 | 1 | 0 | 0.607219  | 5.596193  | 2.580100  |
| 313 | 1 | 0 | 0.109162  | 12.561453 | 0.309044  |
| 314 | 1 | 0 | 0.475289  | 11.648564 | 1.775877  |
| 315 | 1 | 0 | 1.619405  | 11.601697 | 0.398909  |
| 316 | 1 | 0 | 1.419907  | 2.940919  | -0.697720 |
| 317 | 6 | 0 | -0.110908 | 1.556839  | -1.326698 |
| 318 | 6 | 0 | 0.525194  | 0.326528  | -0.637869 |
| 319 | 1 | 0 | -1.196194 | 1.554098  | -1.182180 |
| 320 | 6 | 0 | 0.199243  | 1.471832  | -2.801529 |
| 321 | 8 | 0 | 1.759872  | 0.219907  | -0.562336 |
| 322 | 7 | 0 | -0.348213 | -0.586455 | -0.162231 |
| 323 | 1 | 0 | 1.302942  | 1.454628  | -2.979601 |
| 324 | 1 | 0 | -0.243102 | 0.533354  | -3.216480 |
| 325 | 1 | 0 | -0.236938 | 2.343067  | -3.347770 |
| 326 | 1 | 0 | -1.352922 | -0.390121 | -0.209917 |
| 327 | 6 | 0 | 0.098438  | -1.811839 | 0.518394  |
| 328 | 6 | 0 | -0.506858 | -3.037560 | -0.205903 |
| 329 | 1 | 0 | 1.191031  | -1.835979 | 0.455019  |
| 330 | 6 | 0 | -0.320493 | -1.884629 | 1.967333  |
| 331 | 8 | 0 | -1.731441 | -3.122555 | -0.382381 |
| 332 | 7 | 0 | 0.384270  | -3.978022 | -0.588712 |
| 333 | 1 | 0 | -1.434453 | -1.874526 | 2.064319  |
| 334 | 1 | 0 | 0.067285  | -2.832044 | 2.415169  |
| 335 | 1 | 0 | 0.095587  | -1.022396 | 2.542730  |
| 336 | 1 | 0 | 1.383822  | -3.799876 | -0.459011 |
| 337 | 6 | 0 | -0.028856 | -5.221841 | -1.257521 |
| 338 | 6 | 0 | 0.440106  | -6.424079 | -0.403496 |
| 339 | 1 | 0 | -1.122295 | -5.204889 | -1.319613 |
| 340 | 6 | 0 | 0.550202  | -5.384547 | -2.641681 |
| 341 | 8 | 0 | 1.637842  | -6.558877 | -0.105979 |
| 342 | 7 | 0 | -0.536157 | -7.282456 | -0.038259 |

|     |   |   |            |            |           |
|-----|---|---|------------|------------|-----------|
| 343 | 1 | 0 | 0.240720   | -4.538364  | -3.301914 |
| 344 | 1 | 0 | 1.667282   | -5.421145  | -2.607752 |
| 345 | 1 | 0 | 0.176489   | -6.338998  | -3.086751 |
| 346 | 1 | 0 | -1.507788  | -7.075160  | -0.286838 |
| 347 | 6 | 0 | -0.260930  | -8.487042  | 0.762957  |
| 348 | 6 | 0 | -0.550302  | -9.741602  | -0.096180 |
| 349 | 1 | 0 | 0.801106   | -8.451324  | 1.030686  |
| 350 | 6 | 0 | -1.096116  | -8.572680  | 2.015945  |
| 351 | 8 | 0 | -1.692887  | -9.978520  | -0.522068 |
| 352 | 7 | 0 | 0.510561   | -10.534220 | -0.338495 |
| 353 | 1 | 0 | -0.920821  | -7.686591  | 2.672958  |
| 354 | 1 | 0 | -2.185578  | -8.622994  | 1.767113  |
| 355 | 1 | 0 | -0.818960  | -9.496278  | 2.580439  |
| 356 | 1 | 0 | 1.433955   | -10.275815 | 0.015474  |
| 357 | 6 | 0 | 0.389495   | -11.747417 | -1.134215 |
| 358 | 1 | 0 | 1.329220   | -12.301196 | -1.068267 |
| 359 | 1 | 0 | -0.426728  | -12.374869 | -0.760207 |
| 360 | 1 | 0 | 0.184445   | -11.516850 | -2.187226 |
| 361 | 6 | 0 | -8.719709  | 11.244325  | 3.688145  |
| 362 | 6 | 0 | -9.584624  | 10.222678  | 2.966226  |
| 363 | 1 | 0 | -9.168893  | 12.233826  | 3.554763  |
| 364 | 1 | 0 | -8.739016  | 11.016027  | 4.759610  |
| 365 | 1 | 0 | -7.687545  | 11.248979  | 3.329719  |
| 366 | 8 | 0 | -10.804407 | 10.145336  | 3.194945  |
| 367 | 7 | 0 | -8.929446  | 9.417222   | 2.093233  |
| 368 | 1 | 0 | -7.935573  | 9.579861   | 1.914742  |
| 369 | 6 | 0 | -9.627184  | 8.377201   | 1.324681  |
| 370 | 6 | 0 | -8.882394  | 7.033030   | 1.496850  |
| 371 | 6 | 0 | -9.718450  | 8.662802   | -0.155795 |
| 372 | 1 | 0 | -10.638183 | 8.301663   | 1.738187  |
| 373 | 8 | 0 | -7.667177  | 6.949344   | 1.258142  |
| 374 | 7 | 0 | -9.658858  | 5.996777   | 1.883620  |
| 375 | 1 | 0 | -10.264016 | 9.620074   | -0.339442 |
| 376 | 1 | 0 | -8.702284  | 8.735850   | -0.615513 |
| 377 | 1 | 0 | -10.277185 | 7.834171   | -0.655730 |
| 378 | 1 | 0 | -10.634229 | 6.174030   | 2.143071  |
| 379 | 6 | 0 | -9.121570  | 4.640238   | 2.063676  |
| 380 | 6 | 0 | -9.910109  | 3.653085   | 1.167741  |
| 381 | 6 | 0 | -9.216286  | 4.137147   | 3.484524  |
| 382 | 1 | 0 | -8.070346  | 4.666076   | 1.758874  |
| 383 | 8 | 0 | -11.148968 | 3.604828   | 1.212981  |
| 384 | 7 | 0 | -9.145202  | 2.855918   | 0.389533  |
| 385 | 1 | 0 | -10.280366 | 4.090818   | 3.824677  |

|     |   |   |            |            |           |
|-----|---|---|------------|------------|-----------|
| 386 | 1 | 0 | -8.778769  | 3.110554   | 3.541183  |
| 387 | 1 | 0 | -8.649199  | 4.804600   | 4.177840  |
| 388 | 1 | 0 | -8.134096  | 3.012416   | 0.358570  |
| 389 | 6 | 0 | -9.722744  | 1.817559   | -0.477605 |
| 390 | 6 | 0 | -9.082640  | 0.457805   | -0.109678 |
| 391 | 6 | 0 | -9.486115  | 2.055047   | -1.949551 |
| 392 | 1 | 0 | -10.800001 | 1.795006   | -0.283188 |
| 393 | 8 | 0 | -7.848133  | 0.327680   | -0.099635 |
| 394 | 7 | 0 | -9.955581  | -0.533057  | 0.170671  |
| 395 | 1 | 0 | -9.929307  | 3.029473   | -2.268575 |
| 396 | 1 | 0 | -8.392982  | 2.066226   | -2.184177 |
| 397 | 1 | 0 | -9.968140  | 1.235303   | -2.536290 |
| 398 | 1 | 0 | -10.958993 | -0.327454  | 0.190239  |
| 399 | 6 | 0 | -9.511649  | -1.891692  | 0.522638  |
| 400 | 6 | 0 | -10.127851 | -2.889458  | -0.486742 |
| 401 | 6 | 0 | -9.929310  | -2.321604  | 1.907963  |
| 402 | 1 | 0 | -8.419222  | -1.902596  | 0.450333  |
| 403 | 8 | 0 | -11.356528 | -2.940160  | -0.646473 |
| 404 | 7 | 0 | -9.241135  | -3.673571  | -1.137507 |
| 405 | 1 | 0 | -9.511704  | -1.630484  | 2.679681  |
| 406 | 1 | 0 | -11.043310 | -2.334417  | 2.005111  |
| 407 | 1 | 0 | -9.543178  | -3.351427  | 2.105230  |
| 408 | 1 | 0 | -8.239359  | -3.533055  | -0.981101 |
| 409 | 6 | 0 | -9.662965  | -4.677289  | -2.126498 |
| 410 | 6 | 0 | -9.192320  | -6.075384  | -1.658568 |
| 411 | 6 | 0 | -9.094798  | -4.439908  | -3.504800 |
| 412 | 1 | 0 | -10.756804 | -4.643930  | -2.173221 |
| 413 | 8 | 0 | -7.998936  | -6.287147  | -1.390278 |
| 414 | 7 | 0 | -10.164158 | -7.010825  | -1.591657 |
| 415 | 1 | 0 | -9.409241  | -3.441858  | -3.895594 |
| 416 | 1 | 0 | -7.977469  | -4.482179  | -3.491383 |
| 417 | 1 | 0 | -9.472781  | -5.229526  | -4.199317 |
| 418 | 1 | 0 | -11.131822 | -6.743444  | -1.791940 |
| 419 | 6 | 0 | -9.886163  | -8.400518  | -1.194499 |
| 420 | 6 | 0 | -10.137166 | -9.333597  | -2.403484 |
| 421 | 6 | 0 | -10.748106 | -8.877096  | -0.051672 |
| 422 | 1 | 0 | -8.831481  | -8.440430  | -0.899493 |
| 423 | 8 | 0 | -11.249893 | -9.381219  | -2.953118 |
| 424 | 7 | 0 | -9.084349  | -10.077908 | -2.790672 |
| 425 | 1 | 0 | -10.467760 | -9.927189  | 0.207594  |
| 426 | 1 | 0 | -10.602282 | -8.235660  | 0.851063  |
| 427 | 1 | 0 | -11.830741 | -8.857615  | -0.332114 |
| 428 | 1 | 0 | -8.176118  | -9.948760  | -2.339330 |

|     |   |   |            |            |           |
|-----|---|---|------------|------------|-----------|
| 429 | 6 | 0 | -9.175479  | -11.008671 | -3.906118 |
| 430 | 1 | 0 | -8.331434  | -11.701529 | -3.854996 |
| 431 | 1 | 0 | -10.111703 | -11.572508 | -3.851207 |
| 432 | 1 | 0 | -9.147687  | -10.487243 | -4.872032 |
| 433 | 8 | 0 | -6.521616  | -9.798621  | -1.621908 |
| 434 | 6 | 0 | -5.380121  | -9.623578  | -1.164087 |
| 435 | 7 | 0 | -4.319226  | -10.374407 | -1.513467 |
| 436 | 6 | 0 | -5.095001  | -8.500014  | -0.138312 |
| 437 | 1 | 0 | -3.394988  | -10.169082 | -1.128025 |
| 438 | 6 | 0 | -4.440134  | -11.459770 | -2.476260 |
| 439 | 6 | 0 | -5.940135  | -8.755124  | 1.084448  |
| 440 | 1 | 0 | -4.034785  | -8.504179  | 0.139416  |
| 441 | 7 | 0 | -5.362784  | -7.195770  | -0.768204 |
| 442 | 1 | 0 | -3.475674  | -11.968405 | -2.547414 |
| 443 | 1 | 0 | -5.204192  | -12.178821 | -2.160001 |
| 444 | 1 | 0 | -4.720063  | -11.082702 | -3.467587 |
| 445 | 1 | 0 | -5.667591  | -9.747562  | 1.519500  |
| 446 | 1 | 0 | -5.770101  | -7.967372  | 1.857811  |
| 447 | 1 | 0 | -7.027543  | -8.769714  | 0.822260  |
| 448 | 1 | 0 | -6.332910  | -6.949067  | -0.985024 |
| 449 | 6 | 0 | -4.378534  | -6.308161  | -1.027136 |
| 450 | 8 | 0 | -3.180772  | -6.494877  | -0.759646 |
| 451 | 6 | 0 | -4.839139  | -4.999893  | -1.713413 |
| 452 | 6 | 0 | -4.253117  | -4.978155  | -3.104093 |
| 453 | 1 | 0 | -5.932211  | -4.970050  | -1.777149 |
| 454 | 7 | 0 | -4.424003  | -3.858384  | -0.882704 |
| 455 | 1 | 0 | -4.555887  | -4.049912  | -3.646642 |
| 456 | 1 | 0 | -3.136279  | -5.023714  | -3.069493 |
| 457 | 1 | 0 | -4.627518  | -5.862817  | -3.674938 |
| 458 | 1 | 0 | -3.423433  | -3.697842  | -0.737650 |
| 459 | 6 | 0 | -5.313783  | -2.976024  | -0.378065 |
| 460 | 8 | 0 | -6.538641  | -3.036274  | -0.560904 |
| 461 | 6 | 0 | -4.706614  | -1.852786  | 0.495702  |
| 462 | 6 | 0 | -5.131540  | -2.103013  | 1.922641  |
| 463 | 1 | 0 | -3.613780  | -1.871339  | 0.432409  |
| 464 | 7 | 0 | -5.149608  | -0.551736  | -0.029767 |
| 465 | 1 | 0 | -4.718241  | -1.318452  | 2.601802  |
| 466 | 1 | 0 | -4.745900  | -3.098688  | 2.251931  |
| 467 | 1 | 0 | -6.246017  | -2.104281  | 2.015106  |
| 468 | 1 | 0 | -6.153217  | -0.344926  | -0.042302 |
| 469 | 6 | 0 | -4.274371  | 0.397937   | -0.422376 |
| 470 | 8 | 0 | -3.039906  | 0.272596   | -0.381043 |
| 471 | 6 | 0 | -4.910079  | 1.698624   | -0.967599 |

|     |   |   |            |           |           |
|-----|---|---|------------|-----------|-----------|
| 472 | 6 | 0 | -4.624123  | 1.764771  | -2.448349 |
| 473 | 1 | 0 | -5.993041  | 1.688468  | -0.806357 |
| 474 | 7 | 0 | -4.369887  | 2.838646  | -0.210166 |
| 475 | 1 | 0 | -5.061094  | 2.691046  | -2.894157 |
| 476 | 1 | 0 | -5.081100  | 0.877548  | -2.950914 |
| 477 | 1 | 0 | -3.523499  | 1.758340  | -2.645452 |
| 478 | 1 | 0 | -3.360136  | 3.006866  | -0.229846 |
| 479 | 6 | 0 | -5.169595  | 3.702266  | 0.452640  |
| 480 | 8 | 0 | -6.407525  | 3.628078  | 0.477059  |
| 481 | 6 | 0 | -4.433311  | 4.813464  | 1.238392  |
| 482 | 6 | 0 | -4.608346  | 4.521138  | 2.709730  |
| 483 | 1 | 0 | -3.366710  | 4.809100  | 0.991711  |
| 484 | 7 | 0 | -4.964856  | 6.124060  | 0.832770  |
| 485 | 1 | 0 | -5.690960  | 4.505721  | 2.989767  |
| 486 | 1 | 0 | -4.166279  | 3.521462  | 2.941354  |
| 487 | 1 | 0 | -4.090340  | 5.292109  | 3.330131  |
| 488 | 6 | 0 | -4.163812  | 7.105890  | 0.363406  |
| 489 | 1 | 0 | -5.957641  | 6.319754  | 0.993945  |
| 490 | 6 | 0 | -4.886534  | 8.420899  | -0.014933 |
| 491 | 8 | 0 | -2.936634  | 6.996152  | 0.211895  |
| 492 | 7 | 0 | -4.238653  | 9.539437  | 0.684888  |
| 493 | 6 | 0 | -4.853089  | 8.544255  | -1.519445 |
| 494 | 1 | 0 | -5.927413  | 8.392665  | 0.324747  |
| 495 | 1 | 0 | -3.247447  | 9.720252  | 0.509362  |
| 496 | 6 | 0 | -4.921328  | 10.358465 | 1.523011  |
| 497 | 1 | 0 | -5.364898  | 9.479947  | -1.851094 |
| 498 | 1 | 0 | -3.801228  | 8.558928  | -1.898056 |
| 499 | 1 | 0 | -5.381966  | 7.669755  | -1.971258 |
| 500 | 8 | 0 | -6.133344  | 10.238881 | 1.770989  |
| 501 | 6 | 0 | -4.095427  | 11.457548 | 2.174219  |
| 502 | 1 | 0 | -4.581891  | 12.418533 | 1.977498  |
| 503 | 1 | 0 | -4.104829  | 11.299736 | 3.258361  |
| 504 | 1 | 0 | -3.064353  | 11.478800 | 1.812994  |
| 505 | 8 | 0 | -17.115703 | 6.672617  | 2.483028  |
| 506 | 6 | 0 | -18.197739 | 6.880389  | 3.054890  |
| 507 | 6 | 0 | -18.751411 | 8.314306  | 3.240663  |
| 508 | 7 | 0 | -18.963610 | 5.908957  | 3.604470  |
| 509 | 7 | 0 | -18.245833 | 8.844269  | 4.518675  |
| 510 | 1 | 0 | -19.845037 | 8.274992  | 3.322339  |
| 511 | 6 | 0 | -18.354659 | 9.155286  | 2.058063  |
| 512 | 1 | 0 | -19.764273 | 6.200275  | 4.158723  |
| 513 | 6 | 0 | -18.550113 | 4.497482  | 3.631683  |
| 514 | 6 | 0 | -18.894768 | 8.562898  | 5.681046  |

|     |   |   |            |           |           |
|-----|---|---|------------|-----------|-----------|
| 515 | 1 | 0 | -17.301126 | 9.236969  | 4.524809  |
| 516 | 1 | 0 | -17.240962 | 9.228293  | 1.973442  |
| 517 | 1 | 0 | -18.747171 | 8.682781  | 1.124750  |
| 518 | 1 | 0 | -18.775702 | 10.186054 | 2.146166  |
| 519 | 6 | 0 | -19.447809 | 3.663186  | 2.677487  |
| 520 | 6 | 0 | -18.645879 | 3.880321  | 5.005288  |
| 521 | 1 | 0 | -17.510567 | 4.461578  | 3.288385  |
| 522 | 6 | 0 | -18.250139 | 9.131172  | 6.936931  |
| 523 | 8 | 0 | -19.945997 | 7.906688  | 5.724829  |
| 524 | 8 | 0 | -20.676302 | 3.754221  | 2.698271  |
| 525 | 7 | 0 | -18.755917 | 2.802885  | 1.874822  |
| 526 | 1 | 0 | -19.697867 | 3.894175  | 5.383808  |
| 527 | 1 | 0 | -18.301610 | 2.818253  | 4.953387  |
| 528 | 1 | 0 | -17.998282 | 4.427647  | 5.732660  |
| 529 | 1 | 0 | -18.939172 | 9.855348  | 7.384811  |
| 530 | 1 | 0 | -18.110035 | 8.319798  | 7.658092  |
| 531 | 1 | 0 | -17.291120 | 9.617311  | 6.735845  |
| 532 | 1 | 0 | -17.739632 | 2.880431  | 1.806414  |
| 533 | 6 | 0 | -19.456203 | 1.928191  | 0.932892  |
| 534 | 6 | 0 | -18.707701 | 0.580117  | 0.841056  |
| 535 | 1 | 0 | -20.466373 | 1.781202  | 1.336143  |
| 536 | 6 | 0 | -19.589208 | 2.479812  | -0.468968 |
| 537 | 8 | 0 | -17.470370 | 0.525773  | 0.882613  |
| 538 | 7 | 0 | -19.494710 | -0.509493 | 0.677591  |
| 539 | 1 | 0 | -18.588609 | 2.652377  | -0.934791 |
| 540 | 1 | 0 | -20.159026 | 1.757157  | -1.102485 |
| 541 | 1 | 0 | -20.143562 | 3.450215  | -0.450946 |
| 542 | 1 | 0 | -20.500273 | -0.409446 | 0.590942  |
| 543 | 6 | 0 | -18.951236 | -1.852817 | 0.440426  |
| 544 | 6 | 0 | -19.728717 | -2.487860 | -0.735986 |
| 545 | 1 | 0 | -17.894948 | -1.743654 | 0.176656  |
| 546 | 6 | 0 | -19.052702 | -2.777664 | 1.629975  |
| 547 | 8 | 0 | -20.930311 | -2.261587 | -0.906591 |
| 548 | 7 | 0 | -18.983927 | -3.328836 | -1.500801 |
| 549 | 1 | 0 | -20.115503 | -2.945087 | 1.930384  |
| 550 | 1 | 0 | -18.595147 | -3.762669 | 1.365608  |
| 551 | 1 | 0 | -18.498730 | -2.353859 | 2.503204  |
| 552 | 1 | 0 | -17.967817 | -3.337541 | -1.393851 |
| 553 | 6 | 0 | -19.569949 | -4.064688 | -2.621842 |
| 554 | 6 | 0 | -18.811674 | -5.401887 | -2.780786 |
| 555 | 1 | 0 | -20.621415 | -4.253418 | -2.369060 |
| 556 | 6 | 0 | -19.534907 | -3.338834 | -3.947678 |
| 557 | 8 | 0 | -17.618225 | -5.504848 | -2.460374 |



|     |   |   |            |            |           |
|-----|---|---|------------|------------|-----------|
| 558 | 7 | 0 | -19.534390 | -6.414799  | -3.307907 |
| 559 | 1 | 0 | -20.081036 | -2.366485  | -3.867802 |
| 560 | 1 | 0 | -18.486579 | -3.129953  | -4.271896 |
| 561 | 1 | 0 | -20.033846 | -3.960721  | -4.730557 |
| 562 | 1 | 0 | -20.474166 | -6.247071  | -3.654208 |
| 563 | 6 | 0 | -18.938242 | -7.699589  | -3.698704 |
| 564 | 6 | 0 | -19.370576 | -7.995839  | -5.155927 |
| 565 | 1 | 0 | -17.850476 | -7.596088  | -3.641851 |
| 566 | 6 | 0 | -19.355223 | -8.860135  | -2.828838 |
| 567 | 8 | 0 | -20.484223 | -7.652483  | -5.565239 |
| 568 | 7 | 0 | -18.439747 | -8.664793  | -5.879751 |
| 569 | 1 | 0 | -19.084900 | -8.670658  | -1.761176 |
| 570 | 1 | 0 | -20.455823 | -9.042145  | -2.889132 |
| 571 | 1 | 0 | -18.820010 | -9.779706  | -3.171862 |
| 572 | 1 | 0 | -17.512808 | -8.781748  | -5.470839 |
| 573 | 6 | 0 | -18.667321 | -9.062599  | -7.260253 |
| 574 | 1 | 0 | -18.446791 | -10.128212 | -7.396361 |
| 575 | 1 | 0 | -19.715987 | -8.878292  | -7.502639 |
| 576 | 1 | 0 | -18.039583 | -8.483453  | -7.949985 |
| 577 | 8 | 0 | -12.288825 | 6.808594   | 2.605199  |
| 578 | 6 | 0 | -13.524488 | 6.910359   | 2.535409  |
| 579 | 6 | 0 | -14.181551 | 8.296170   | 2.314250  |
| 580 | 7 | 0 | -14.376007 | 5.865250   | 2.613691  |
| 581 | 7 | 0 | -13.589137 | 9.264807   | 3.247364  |
| 582 | 1 | 0 | -15.253423 | 8.244903   | 2.532042  |
| 583 | 6 | 0 | -13.989536 | 8.663685   | 0.862036  |
| 584 | 1 | 0 | -15.387402 | 6.034179   | 2.587843  |
| 585 | 6 | 0 | -13.896026 | 4.489832   | 2.841207  |
| 586 | 6 | 0 | -14.316104 | 9.902768   | 4.196413  |
| 587 | 1 | 0 | -12.589263 | 9.467827   | 3.169667  |
| 588 | 1 | 0 | -12.903569 | 8.714222   | 0.598658  |
| 589 | 1 | 0 | -14.477408 | 7.889356   | 0.220675  |
| 590 | 1 | 0 | -14.456291 | 9.654026   | 0.640576  |
| 591 | 6 | 0 | -14.673482 | 3.543016   | 1.900110  |
| 592 | 6 | 0 | -14.097950 | 4.000303   | 4.255706  |
| 593 | 1 | 0 | -12.827640 | 4.478135   | 2.603594  |
| 594 | 6 | 0 | -13.531502 | 10.857248  | 5.083644  |
| 595 | 8 | 0 | -15.537187 | 9.736657   | 4.360913  |
| 596 | 8 | 0 | -15.907900 | 3.462107   | 1.968255  |
| 597 | 7 | 0 | -13.911483 | 2.826469   | 1.040963  |
| 598 | 1 | 0 | -15.184113 | 3.974688   | 4.520504  |
| 599 | 1 | 0 | -13.685766 | 2.965927   | 4.348516  |
| 600 | 1 | 0 | -13.567002 | 4.661932   | 4.982232  |

|     |   |   |            |           |           |
|-----|---|---|------------|-----------|-----------|
| 601 | 1 | 0 | -14.007533 | 11.842301 | 5.036816  |
| 602 | 1 | 0 | -13.604261 | 10.505944 | 6.118767  |
| 603 | 1 | 0 | -12.481200 | 10.935691 | 4.792512  |
| 604 | 1 | 0 | -12.903062 | 2.995373  | 1.006405  |
| 605 | 6 | 0 | -14.515869 | 1.894254  | 0.077920  |
| 606 | 6 | 0 | -13.894795 | 0.490347  | 0.263183  |
| 607 | 1 | 0 | -15.587895 | 1.867577  | 0.298256  |
| 608 | 6 | 0 | -14.311911 | 2.294131  | -1.364075 |
| 609 | 8 | 0 | -12.664645 | 0.333226  | 0.223446  |
| 610 | 7 | 0 | -14.785971 | -0.512665 | 0.428939  |
| 611 | 1 | 0 | -13.224919 | 2.319889  | -1.624320 |
| 612 | 1 | 0 | -14.819255 | 1.551585  | -2.027224 |
| 613 | 1 | 0 | -14.749661 | 3.303095  | -1.559431 |
| 614 | 1 | 0 | -15.775660 | -0.279512 | 0.544572  |
| 615 | 6 | 0 | -14.371714 | -1.919894 | 0.559606  |
| 616 | 6 | 0 | -14.957275 | -2.734656 | -0.622626 |
| 617 | 1 | 0 | -13.277054 | -1.936523 | 0.525930  |
| 618 | 6 | 0 | -14.849424 | -2.566442 | 1.837125  |
| 619 | 8 | 0 | -16.174132 | -2.709346 | -0.861126 |
| 620 | 7 | 0 | -14.061244 | -3.468522 | -1.321624 |
| 621 | 1 | 0 | -15.967640 | -2.580556 | 1.886509  |
| 622 | 1 | 0 | -14.478839 | -3.619858 | 1.876934  |
| 623 | 1 | 0 | -14.460463 | -2.017815 | 2.728956  |
| 624 | 1 | 0 | -13.062051 | -3.361963 | -1.125737 |
| 625 | 6 | 0 | -14.469169 | -4.268916 | -2.486637 |
| 626 | 6 | 0 | -13.987731 | -5.729730 | -2.316657 |
| 627 | 1 | 0 | -15.562600 | -4.233509 | -2.523241 |
| 628 | 6 | 0 | -13.910373 | -3.761335 | -3.795047 |
| 629 | 8 | 0 | -12.791882 | -5.990655 | -2.112951 |
| 630 | 7 | 0 | -14.956910 | -6.663114 | -2.450150 |
| 631 | 1 | 0 | -14.238010 | -2.710184 | -3.983203 |
| 632 | 1 | 0 | -12.792628 | -3.792131 | -3.792713 |
| 633 | 1 | 0 | -14.282361 | -4.404692 | -4.629493 |
| 634 | 1 | 0 | -15.931045 | -6.357434 | -2.522017 |
| 635 | 6 | 0 | -14.671305 | -8.107738 | -2.402014 |
| 636 | 6 | 0 | -14.820037 | -8.713904 | -3.822715 |
| 637 | 1 | 0 | -13.636115 | -8.215616 | -2.057816 |
| 638 | 6 | 0 | -15.593766 | -8.861921 | -1.477461 |
| 639 | 8 | 0 | -15.902695 | -8.669577 | -4.431210 |
| 640 | 7 | 0 | -13.711193 | -9.284839 | -4.327874 |
| 641 | 1 | 0 | -15.537598 | -8.455490 | -0.438546 |
| 642 | 1 | 0 | -16.655095 | -8.797711 | -1.829563 |
| 643 | 1 | 0 | -15.293333 | -9.937990 | -1.456079 |

|     |   |   |            |            |           |
|-----|---|---|------------|------------|-----------|
| 644 | 1 | 0 | -12.840262 | -9.277463  | -3.793065 |
| 645 | 6 | 0 | -13.707667 | -9.896966  | -5.648852 |
| 646 | 1 | 0 | -12.715743 | -10.316736 | -5.833160 |
| 647 | 1 | 0 | -14.454656 | -10.696586 | -5.713951 |
| 648 | 1 | 0 | -13.935413 | -9.159308  | -6.427567 |

P Pl (Ac-AAAAAA-NHMe)<sub>10</sub>

|    |   |   |          |           |           |
|----|---|---|----------|-----------|-----------|
| 1  | 6 | 0 | 2.897709 | 11.650664 | 0.032817  |
| 2  | 6 | 0 | 2.118710 | 10.441497 | -0.462204 |
| 3  | 1 | 0 | 2.448226 | 12.551427 | -0.397983 |
| 4  | 1 | 0 | 2.782894 | 11.713776 | 1.120484  |
| 5  | 1 | 0 | 3.958340 | 11.602502 | -0.225614 |
| 6  | 8 | 0 | 0.888880 | 10.364356 | -0.299759 |
| 7  | 7 | 0 | 2.861256 | 9.480298  | -1.065941 |
| 8  | 1 | 0 | 3.864138 | 9.633157  | -1.195942 |
| 9  | 6 | 0 | 2.260865 | 8.248348  | -1.597450 |
| 10 | 6 | 0 | 2.972626 | 7.030211  | -0.963160 |
| 11 | 6 | 0 | 2.373970 | 8.113023  | -3.097324 |
| 12 | 1 | 0 | 1.203247 | 8.260499  | -1.313248 |
| 13 | 8 | 0 | 4.206754 | 6.915361  | -1.033005 |
| 14 | 7 | 0 | 2.156248 | 6.129427  | -0.373087 |
| 15 | 1 | 0 | 1.873001 | 8.969376  | -3.610310 |
| 16 | 1 | 0 | 3.444405 | 8.080745  | -3.418294 |
| 17 | 1 | 0 | 1.877053 | 7.165313  | -3.419011 |
| 18 | 1 | 0 | 1.154909 | 6.333110  | -0.298699 |
| 19 | 6 | 0 | 2.675611 | 4.910245  | 0.266345  |
| 20 | 6 | 0 | 1.974460 | 3.678830  | -0.354561 |
| 21 | 6 | 0 | 2.442292 | 4.864121  | 1.757596  |
| 22 | 1 | 0 | 3.751292 | 4.875214  | 0.065824  |
| 23 | 8 | 0 | 0.736677 | 3.599922  | -0.365545 |
| 24 | 7 | 0 | 2.801765 | 2.726673  | -0.838386 |
| 25 | 1 | 0 | 1.349407 | 4.884098  | 1.993604  |
| 26 | 1 | 0 | 2.878310 | 3.921263  | 2.169115  |
| 27 | 1 | 0 | 2.932033 | 5.732589  | 2.261154  |
| 28 | 1 | 0 | 3.811003 | 2.898404  | -0.846724 |
| 29 | 6 | 0 | 2.295830 | 1.476072  | -1.426494 |
| 30 | 6 | 0 | 2.926879 | 0.285241  | -0.667181 |
| 31 | 6 | 0 | 2.628461 | 1.317150  | -2.890368 |
| 32 | 1 | 0 | 1.208550 | 1.475423  | -1.298068 |
| 33 | 8 | 0 | 4.160791 | 0.186900  | -0.571284 |
| 34 | 7 | 0 | 2.050351 | -0.605934 | -0.156974 |
| 35 | 1 | 0 | 2.196714 | 2.156933  | -3.487047 |
| 36 | 1 | 0 | 3.734796 | 1.296534  | -3.050923 |
| 37 | 1 | 0 | 2.196609 | 0.356339  | -3.263103 |
| 38 | 1 | 0 | 1.045963 | -0.413372 | -0.223120 |
| 39 | 6 | 0 | 2.492151 | -1.792956 | 0.591391  |
| 40 | 6 | 0 | 1.897296 | -3.057896 | -0.071910 |
| 41 | 6 | 0 | 2.058778 | -1.790549 | 2.038012  |

|    |   |   |          |            |           |
|----|---|---|----------|------------|-----------|
| 42 | 1 | 0 | 3.585388 | -1.817908  | 0.540763  |
| 43 | 8 | 0 | 0.675417 | -3.154290  | -0.261851 |
| 44 | 7 | 0 | 2.793811 | -4.018905  | -0.385038 |
| 45 | 1 | 0 | 2.467728 | -0.898411  | 2.571413  |
| 46 | 1 | 0 | 0.943888 | -1.777634  | 2.123330  |
| 47 | 1 | 0 | 2.443596 | -2.712285  | 2.538856  |
| 48 | 1 | 0 | 3.791575 | -3.832025  | -0.253562 |
| 49 | 6 | 0 | 2.389395 | -5.300298  | -0.984773 |
| 50 | 6 | 0 | 2.864854 | -6.451077  | -0.066003 |
| 51 | 6 | 0 | 2.970487 | -5.536062  | -2.357607 |
| 52 | 1 | 0 | 1.296015 | -5.293539  | -1.048512 |
| 53 | 8 | 0 | 4.062140 | -6.558265  | 0.243998  |
| 54 | 7 | 0 | 1.894903 | -7.299423  | 0.337831  |
| 55 | 1 | 0 | 2.656644 | -4.729486  | -3.063759 |
| 56 | 1 | 0 | 4.087707 | -5.564250  | -2.321268 |
| 57 | 1 | 0 | 2.602549 | -6.515791  | -2.749368 |
| 58 | 1 | 0 | 0.922304 | -7.111792  | 0.077816  |
| 59 | 6 | 0 | 2.177254 | -8.458040  | 1.201872  |
| 60 | 6 | 0 | 1.883287 | -9.757993  | 0.414871  |
| 61 | 6 | 0 | 1.351844 | -8.476316  | 2.464169  |
| 62 | 1 | 0 | 3.241152 | -8.406659  | 1.459295  |
| 63 | 8 | 0 | 0.738072 | -10.019076 | 0.010517  |
| 64 | 7 | 0 | 2.943420 | -10.561718 | 0.208973  |
| 65 | 1 | 0 | 1.634990 | -9.367368  | 3.076023  |
| 66 | 1 | 0 | 1.530745 | -7.555499  | 3.070500  |
| 67 | 1 | 0 | 0.260595 | -8.541559  | 2.227034  |
| 68 | 1 | 0 | 3.868057 | -10.284520 | 0.545076  |
| 69 | 6 | 0 | 2.817816 | -11.816980 | -0.517875 |
| 70 | 1 | 0 | 3.767324 | -12.353560 | -0.450474 |
| 71 | 1 | 0 | 2.022383 | -12.435850 | -0.088360 |
| 72 | 1 | 0 | 2.579290 | -11.644444 | -1.574776 |
| 73 | 8 | 0 | 5.558484 | -9.938673  | 1.135756  |
| 74 | 6 | 0 | 6.682168 | -9.615604  | 1.555336  |
| 75 | 7 | 0 | 7.757772 | -10.422643 | 1.491112  |
| 76 | 6 | 0 | 6.929270 | -8.227390  | 2.193740  |
| 77 | 1 | 0 | 8.663209 | -10.096351 | 1.834926  |
| 78 | 6 | 0 | 7.675380 | -11.754595 | 0.908557  |
| 79 | 6 | 0 | 6.048159 | -8.105921  | 3.411719  |
| 80 | 1 | 0 | 7.979998 | -8.131221  | 2.489564  |
| 81 | 7 | 0 | 6.676454 | -7.184318  | 1.185047  |
| 82 | 1 | 0 | 8.639733 | -12.251283 | 1.040024  |
| 83 | 1 | 0 | 6.895078 | -12.347216 | 1.399089  |
| 84 | 1 | 0 | 7.440876 | -11.706141 | -0.161837 |

|     |   |   |          |           |           |
|-----|---|---|----------|-----------|-----------|
| 85  | 1 | 0 | 6.310999 | -8.913473 | 4.137892  |
| 86  | 1 | 0 | 6.191779 | -7.116839 | 3.910377  |
| 87  | 1 | 0 | 4.969217 | -8.214080 | 3.136921  |
| 88  | 1 | 0 | 5.713945 | -7.037577 | 0.866924  |
| 89  | 6 | 0 | 7.658943 | -6.385958 | 0.716443  |
| 90  | 8 | 0 | 8.843373 | -6.444979 | 1.084015  |
| 91  | 6 | 0 | 7.219974 | -5.360509 | -0.355523 |
| 92  | 6 | 0 | 7.860546 | -5.756879 | -1.663297 |
| 93  | 1 | 0 | 6.130401 | -5.369545 | -0.466173 |
| 94  | 7 | 0 | 7.596189 | -4.013169 | 0.101173  |
| 95  | 1 | 0 | 7.576592 | -5.043823 | -2.474868 |
| 96  | 1 | 0 | 8.975184 | -5.773034 | -1.575783 |
| 97  | 1 | 0 | 7.511370 | -6.779258 | -1.948867 |
| 98  | 1 | 0 | 8.587066 | -3.804525 | 0.249349  |
| 99  | 6 | 0 | 6.684107 | -3.030060 | 0.265054  |
| 100 | 8 | 0 | 5.471266 | -3.159388 | 0.040872  |
| 101 | 6 | 0 | 7.247032 | -1.691916 | 0.799909  |
| 102 | 6 | 0 | 6.749513 | -1.523858 | 2.215933  |
| 103 | 1 | 0 | 8.341455 | -1.714957 | 0.800201  |
| 104 | 7 | 0 | 6.836903 | -0.602538 | -0.099837 |
| 105 | 1 | 0 | 7.131978 | -0.572486 | 2.658928  |
| 106 | 1 | 0 | 7.113534 | -2.377876 | 2.837723  |
| 107 | 1 | 0 | 5.631794 | -1.509484 | 2.249703  |
| 108 | 1 | 0 | 5.835855 | -0.422344 | -0.226857 |
| 109 | 6 | 0 | 7.734137 | 0.228990  | -0.670723 |
| 110 | 8 | 0 | 8.963178 | 0.146265  | -0.515122 |
| 111 | 6 | 0 | 7.135385 | 1.328001  | -1.580298 |
| 112 | 6 | 0 | 7.535043 | 1.017814  | -3.002364 |
| 113 | 1 | 0 | 6.043339 | 1.334533  | -1.501123 |
| 114 | 7 | 0 | 7.612697 | 2.636973  | -1.105609 |
| 115 | 1 | 0 | 7.130406 | 1.787422  | -3.703532 |
| 116 | 1 | 0 | 7.121910 | 0.020490  | -3.290909 |
| 117 | 1 | 0 | 8.647694 | 0.986987  | -3.109050 |
| 118 | 1 | 0 | 8.620328 | 2.817195  | -1.102015 |
| 119 | 6 | 0 | 6.763912 | 3.621167  | -0.736678 |
| 120 | 8 | 0 | 5.527829 | 3.527871  | -0.772992 |
| 121 | 6 | 0 | 7.437890 | 4.913796  | -0.218172 |
| 122 | 6 | 0 | 7.156030 | 5.012278  | 1.262040  |
| 123 | 1 | 0 | 8.519804 | 4.869092  | -0.380070 |
| 124 | 7 | 0 | 6.933647 | 6.059994  | -0.990853 |
| 125 | 1 | 0 | 6.055774 | 5.044800  | 1.459533  |
| 126 | 1 | 0 | 7.584179 | 4.118674  | 1.778342  |
| 127 | 1 | 0 | 7.623086 | 5.930786  | 1.693135  |

|     |   |   |           |            |           |
|-----|---|---|-----------|------------|-----------|
| 128 | 6 | 0 | 7.763785  | 6.896857   | -1.651093 |
| 129 | 1 | 0 | 5.930233  | 6.265873   | -0.964705 |
| 130 | 6 | 0 | 7.066571  | 8.039623   | -2.427014 |
| 131 | 8 | 0 | 8.999415  | 6.778932   | -1.677386 |
| 132 | 7 | 0 | 7.653150  | 9.322781   | -2.015742 |
| 133 | 6 | 0 | 7.215916  | 7.746818   | -3.901017 |
| 134 | 1 | 0 | 6.002407  | 8.078106   | -2.170778 |
| 135 | 1 | 0 | 8.655887  | 9.469074   | -2.153754 |
| 136 | 6 | 0 | 6.900205  | 10.332995  | -1.513553 |
| 137 | 1 | 0 | 6.726460  | 8.542202   | -4.513610 |
| 138 | 1 | 0 | 8.293931  | 7.684962   | -4.191047 |
| 139 | 1 | 0 | 6.728118  | 6.768528   | -4.132434 |
| 140 | 8 | 0 | 5.669789  | 10.264512  | -1.352790 |
| 141 | 6 | 0 | 7.669500  | 11.588791  | -1.132178 |
| 142 | 1 | 0 | 7.209229  | 12.443721  | -1.638128 |
| 143 | 1 | 0 | 7.560154  | 11.746868  | -0.053581 |
| 144 | 1 | 0 | 8.729559  | 11.527460  | -1.390506 |
| 145 | 8 | 0 | 10.327192 | -9.665121  | 2.467288  |
| 146 | 6 | 0 | 11.415693 | -9.271290  | 2.917115  |
| 147 | 6 | 0 | 11.617379 | -7.799746  | 3.353928  |
| 148 | 7 | 0 | 12.490367 | -10.069173 | 3.064877  |
| 149 | 7 | 0 | 11.408199 | -6.916487  | 2.194229  |
| 150 | 6 | 0 | 10.672552 | -7.515820  | 4.494904  |
| 151 | 1 | 0 | 12.650001 | -7.646423  | 3.686823  |
| 152 | 1 | 0 | 13.365392 | -9.683480  | 3.424411  |
| 153 | 6 | 0 | 12.448572 | -11.478619 | 2.700850  |
| 154 | 1 | 0 | 10.458059 | -6.815648  | 1.824332  |
| 155 | 6 | 0 | 12.410506 | -6.196312  | 1.650110  |
| 156 | 1 | 0 | 10.901106 | -8.207115  | 5.342544  |
| 157 | 1 | 0 | 10.784508 | -6.463586  | 4.852533  |
| 158 | 1 | 0 | 9.610059  | -7.675823  | 4.183712  |
| 159 | 1 | 0 | 13.380842 | -11.948943 | 3.022867  |
| 160 | 1 | 0 | 11.604574 | -11.979771 | 3.187265  |
| 161 | 1 | 0 | 12.339763 | -11.607346 | 1.616880  |
| 162 | 6 | 0 | 12.015002 | -5.318022  | 0.439918  |
| 163 | 8 | 0 | 13.583928 | -6.209804  | 2.057532  |
| 164 | 7 | 0 | 12.379463 | -3.923494  | 0.738789  |
| 165 | 6 | 0 | 12.702103 | -5.874230  | -0.782859 |
| 166 | 1 | 0 | 10.930139 | -5.341893  | 0.291550  |
| 167 | 6 | 0 | 11.463060 | -2.930501  | 0.765034  |
| 168 | 1 | 0 | 13.364215 | -3.696243  | 0.896330  |
| 169 | 1 | 0 | 12.452271 | -5.267918  | -1.687145 |
| 170 | 1 | 0 | 13.812552 | -5.879835  | -0.651991 |

|     |   |   |           |           |           |
|-----|---|---|-----------|-----------|-----------|
| 171 | 1 | 0 | 12.358761 | -6.924190 | -0.951711 |
| 172 | 6 | 0 | 12.013067 | -1.537409 | 1.153412  |
| 173 | 8 | 0 | 10.256837 | -3.088843 | 0.526408  |
| 174 | 7 | 0 | 11.628732 | -0.563584 | 0.119983  |
| 175 | 6 | 0 | 11.476690 | -1.203303 | 2.525011  |
| 176 | 1 | 0 | 13.107000 | -1.557948 | 1.186397  |
| 177 | 6 | 0 | 12.541610 | 0.189297  | -0.529403 |
| 178 | 1 | 0 | 10.631443 | -0.401664 | -0.053534 |
| 179 | 1 | 0 | 11.847159 | -0.204848 | 2.861891  |
| 180 | 1 | 0 | 10.358486 | -1.188109 | 2.526058  |
| 181 | 1 | 0 | 11.822923 | -1.976130 | 3.253925  |
| 182 | 6 | 0 | 11.965181 | 1.172953  | -1.574995 |
| 183 | 8 | 0 | 13.767316 | 0.122908  | -0.341130 |
| 184 | 7 | 0 | 12.431769 | 2.529311  | -1.245013 |
| 185 | 6 | 0 | 12.396886 | 0.700522  | -2.941883 |
| 186 | 1 | 0 | 10.871565 | 1.186762  | -1.521913 |
| 187 | 6 | 0 | 11.574562 | 3.547357  | -1.010271 |
| 188 | 1 | 0 | 13.438535 | 2.710729  | -1.239663 |
| 189 | 1 | 0 | 12.009077 | 1.382794  | -3.736739 |
| 190 | 1 | 0 | 13.511621 | 0.659241  | -3.018921 |
| 191 | 1 | 0 | 11.989432 | -0.324244 | -3.122051 |
| 192 | 6 | 0 | 12.237484 | 4.894921  | -0.637239 |
| 193 | 8 | 0 | 10.339964 | 3.446079  | -1.058451 |
| 194 | 7 | 0 | 11.727811 | 5.943743  | -1.533819 |
| 195 | 6 | 0 | 11.949606 | 5.157591  | 0.821427  |
| 196 | 1 | 0 | 13.320241 | 4.840255  | -0.790178 |
| 197 | 6 | 0 | 12.548170 | 6.673023  | -2.320831 |
| 198 | 1 | 0 | 10.725296 | 6.155281  | -1.521997 |
| 199 | 1 | 0 | 10.848514 | 5.204288  | 1.011064  |
| 200 | 1 | 0 | 12.382210 | 4.330991  | 1.436276  |
| 201 | 1 | 0 | 12.408588 | 6.122281  | 1.147613  |
| 202 | 6 | 0 | 11.843837 | 7.726931  | -3.208038 |
| 203 | 8 | 0 | 13.780970 | 6.529048  | -2.369415 |
| 204 | 7 | 0 | 12.433447 | 9.045400  | -2.934761 |
| 205 | 1 | 0 | 10.781648 | 7.792239  | -2.948917 |
| 206 | 6 | 0 | 11.983128 | 7.283120  | -4.644592 |
| 207 | 6 | 0 | 11.684445 | 10.106663 | -2.543613 |
| 208 | 1 | 0 | 13.435205 | 9.174324  | -3.093117 |
| 209 | 1 | 0 | 13.059180 | 7.189664  | -4.933438 |
| 210 | 1 | 0 | 11.493020 | 6.286869  | -4.770423 |
| 211 | 1 | 0 | 11.490243 | 8.011554  | -5.333019 |
| 212 | 6 | 0 | 12.458767 | 11.392804 | -2.297279 |
| 213 | 8 | 0 | 10.454286 | 10.060719 | -2.376218 |



|     |   |   |           |            |           |
|-----|---|---|-----------|------------|-----------|
| 214 | 1 | 0 | 11.995593 | 12.193423  | -2.882996 |
| 215 | 1 | 0 | 12.358696 | 11.658972  | -1.239239 |
| 216 | 1 | 0 | 13.516615 | 11.303549  | -2.556219 |
| 217 | 1 | 0 | 15.115671 | -6.457777  | 2.968299  |
| 218 | 7 | 0 | 16.034554 | -6.454261  | 3.423178  |
| 219 | 6 | 0 | 17.049642 | -5.771472  | 2.856530  |
| 220 | 6 | 0 | 16.165608 | -7.081862  | 4.748700  |
| 221 | 6 | 0 | 16.753784 | -5.150153  | 1.471380  |
| 222 | 8 | 0 | 18.170149 | -5.632926  | 3.372733  |
| 223 | 6 | 0 | 15.996621 | -8.614770  | 4.619882  |
| 224 | 6 | 0 | 15.148628 | -6.586095  | 5.747215  |
| 225 | 1 | 0 | 17.172279 | -6.843349  | 5.108324  |
| 226 | 7 | 0 | 17.140912 | -3.730801  | 1.511580  |
| 227 | 6 | 0 | 17.498542 | -5.950531  | 0.431984  |
| 228 | 1 | 0 | 15.679870 | -5.187984  | 1.260278  |
| 229 | 8 | 0 | 14.965511 | -9.107021  | 4.134496  |
| 230 | 7 | 0 | 17.023954 | -9.349606  | 5.089852  |
| 231 | 1 | 0 | 15.321964 | -7.088579  | 6.730175  |
| 232 | 1 | 0 | 15.237208 | -5.481912  | 5.890909  |
| 233 | 1 | 0 | 14.108466 | -6.819107  | 5.408181  |
| 234 | 6 | 0 | 16.233375 | -2.736723  | 1.383895  |
| 235 | 1 | 0 | 18.124087 | -3.497869  | 1.658148  |
| 236 | 1 | 0 | 17.317414 | -5.536746  | -0.589771 |
| 237 | 1 | 0 | 18.599133 | -5.942426  | 0.629405  |
| 238 | 1 | 0 | 17.139683 | -7.008643  | 0.456530  |
| 239 | 1 | 0 | 17.873087 | -8.891506  | 5.425972  |
| 240 | 6 | 0 | 16.998657 | -10.806035 | 5.066621  |
| 241 | 6 | 0 | 16.790727 | -1.308559  | 1.583348  |
| 242 | 8 | 0 | 15.029498 | -2.920893  | 1.155098  |
| 243 | 1 | 0 | 17.780120 | -11.179732 | 5.732868  |
| 244 | 1 | 0 | 16.025484 | -11.171725 | 5.407955  |
| 245 | 1 | 0 | 17.174626 | -11.196748 | 4.056080  |
| 246 | 7 | 0 | 16.422755 | -0.477358  | 0.427253  |
| 247 | 6 | 0 | 16.253105 | -0.792343  | 2.896988  |
| 248 | 1 | 0 | 17.884412 | -1.329574  | 1.625159  |
| 249 | 6 | 0 | 17.351851 | 0.204900   | -0.275292 |
| 250 | 1 | 0 | 15.428720 | -0.347440  | 0.210785  |
| 251 | 1 | 0 | 16.628206 | 0.240289   | 3.098736  |
| 252 | 1 | 0 | 15.135081 | -0.771067  | 2.892396  |
| 253 | 1 | 0 | 16.593349 | -1.462602  | 3.723690  |
| 254 | 6 | 0 | 16.809825 | 1.026255   | -1.471412 |
| 255 | 8 | 0 | 18.569083 | 0.178345   | -0.027717 |
| 256 | 7 | 0 | 17.270681 | 2.419761   | -1.352865 |

|     |   |   |           |           |           |
|-----|---|---|-----------|-----------|-----------|
| 257 | 6 | 0 | 17.274798 | 0.346917  | -2.736773 |
| 258 | 1 | 0 | 15.714999 | 1.047534  | -1.448051 |
| 259 | 1 | 0 | 18.269748 | 2.612503  | -1.450300 |
| 260 | 6 | 0 | 16.405220 | 3.454839  | -1.244835 |
| 261 | 1 | 0 | 16.910996 | 0.897197  | -3.638206 |
| 262 | 1 | 0 | 16.867846 | -0.693364 | -2.766718 |
| 263 | 1 | 0 | 18.391800 | 0.293764  | -2.777469 |
| 264 | 6 | 0 | 17.058674 | 4.847529  | -1.085737 |
| 265 | 8 | 0 | 15.172366 | 3.333630  | -1.238074 |
| 266 | 7 | 0 | 16.520858 | 5.753183  | -2.113518 |
| 267 | 6 | 0 | 16.801793 | 5.311737  | 0.328013  |
| 268 | 1 | 0 | 18.138256 | 4.785178  | -1.255307 |
| 269 | 6 | 0 | 17.336630 | 6.449822  | -2.935736 |
| 270 | 1 | 0 | 15.511626 | 5.931227  | -2.136522 |
| 271 | 1 | 0 | 15.704986 | 5.375832  | 0.536080  |
| 272 | 1 | 0 | 17.257873 | 4.584663  | 1.043392  |
| 273 | 1 | 0 | 17.257089 | 6.316710  | 0.502628  |
| 274 | 6 | 0 | 16.618286 | 7.328843  | -3.990864 |
| 275 | 8 | 0 | 18.576557 | 6.378181  | -2.906318 |
| 276 | 7 | 0 | 17.181311 | 8.686814  | -3.985041 |
| 277 | 6 | 0 | 16.756456 | 6.626950  | -5.321609 |
| 278 | 1 | 0 | 15.556391 | 7.423615  | -3.738566 |
| 279 | 1 | 0 | 18.147838 | 8.824654  | -4.284041 |
| 280 | 6 | 0 | 16.424745 | 9.780220  | -3.707221 |
| 281 | 1 | 0 | 16.253772 | 7.209769  | -6.131033 |
| 282 | 1 | 0 | 16.275757 | 5.620201  | -5.257818 |
| 283 | 1 | 0 | 17.833366 | 6.490960  | -5.595202 |
| 284 | 6 | 0 | 17.157854 | 11.111822 | -3.755942 |
| 285 | 8 | 0 | 15.220011 | 9.725825  | -3.413233 |
| 286 | 1 | 0 | 16.580864 | 11.800755 | -4.380821 |
| 287 | 1 | 0 | 17.182611 | 11.528615 | -2.742834 |
| 288 | 1 | 0 | 18.176477 | 11.021660 | -4.140468 |
| 289 | 1 | 0 | 19.735477 | -5.577203 | 4.151891  |
| 290 | 7 | 0 | 20.656391 | -5.665484 | 4.591217  |
| 291 | 6 | 0 | 21.779599 | -5.543945 | 3.846985  |
| 292 | 6 | 0 | 20.712038 | -6.186081 | 5.969453  |
| 293 | 6 | 0 | 21.540374 | -5.041837 | 2.401497  |
| 294 | 8 | 0 | 22.920679 | -5.791860 | 4.266520  |
| 295 | 6 | 0 | 20.661196 | -7.734662 | 5.901562  |
| 296 | 6 | 0 | 19.596912 | -5.679426 | 6.840409  |
| 297 | 1 | 0 | 21.677901 | -5.875993 | 6.387997  |
| 298 | 7 | 0 | 21.971924 | -3.634099 | 2.302102  |
| 299 | 6 | 0 | 22.268320 | -5.958586 | 1.452589  |

|     |   |   |           |            |           |
|-----|---|---|-----------|------------|-----------|
| 300 | 1 | 0 | 20.468913 | -5.043717  | 2.172497  |
| 301 | 8 | 0 | 19.605444 | -8.376846  | 6.003917  |
| 302 | 7 | 0 | 21.872617 | -8.302978  | 5.679694  |
| 303 | 1 | 0 | 19.701086 | -6.123383  | 7.860811  |
| 304 | 1 | 0 | 19.633168 | -4.566143  | 6.925355  |
| 305 | 1 | 0 | 18.598886 | -5.975107  | 6.431305  |
| 306 | 6 | 0 | 21.122091 | -2.621385  | 1.985051  |
| 307 | 1 | 0 | 22.955199 | -3.432673  | 2.434764  |
| 308 | 1 | 0 | 22.147666 | -5.617671  | 0.395679  |
| 309 | 1 | 0 | 23.359247 | -6.005034  | 1.694282  |
| 310 | 1 | 0 | 21.845339 | -6.989107  | 1.543537  |
| 311 | 1 | 0 | 22.630731 | -7.668465  | 5.437187  |
| 312 | 6 | 0 | 22.041963 | -9.729876  | 5.443740  |
| 313 | 6 | 0 | 21.758292 | -1.212514  | 1.942562  |
| 314 | 8 | 0 | 19.917121 | -2.786455  | 1.766271  |
| 315 | 1 | 0 | 23.010901 | -10.054543 | 5.835533  |
| 316 | 1 | 0 | 21.245578 | -10.268014 | 5.962064  |
| 317 | 1 | 0 | 21.990997 | -9.976244  | 4.374746  |
| 318 | 7 | 0 | 21.268759 | -0.515984  | 0.750014  |
| 319 | 6 | 0 | 21.444012 | -0.524046  | 3.249974  |
| 320 | 1 | 0 | 22.848550 | -1.274065  | 1.835387  |
| 321 | 6 | 0 | 22.104794 | 0.202553   | -0.048571 |
| 322 | 1 | 0 | 20.259607 | -0.444847  | 0.599205  |
| 323 | 1 | 0 | 21.898871 | 0.496320   | 3.273541  |
| 324 | 1 | 0 | 21.866157 | -1.121020  | 4.094906  |
| 325 | 1 | 0 | 20.341014 | -0.424701  | 3.400078  |
| 326 | 6 | 0 | 21.412910 | 0.809603   | -1.291853 |
| 327 | 8 | 0 | 23.316094 | 0.341533   | 0.142316  |
| 328 | 7 | 0 | 22.010141 | 2.124645   | -1.562404 |
| 329 | 6 | 0 | 21.552665 | -0.171587  | -2.431202 |
| 330 | 1 | 0 | 20.348157 | 0.966551   | -1.094741 |
| 331 | 6 | 0 | 21.266751 | 3.238738   | -1.762700 |
| 332 | 1 | 0 | 23.019980 | 2.187692   | -1.497436 |
| 333 | 1 | 0 | 21.052636 | 0.221175   | -3.350194 |
| 334 | 1 | 0 | 21.060737 | -1.133765  | -2.145401 |
| 335 | 1 | 0 | 22.625284 | -0.374896  | -2.668446 |
| 336 | 6 | 0 | 22.067713 | 4.550196   | -1.930518 |
| 337 | 8 | 0 | 20.029301 | 3.241132   | -1.790553 |
| 338 | 7 | 0 | 21.348807 | 5.414705   | -2.868216 |
| 339 | 6 | 0 | 22.286885 | 5.145069   | -0.558667 |
| 340 | 1 | 0 | 23.049578 | 4.349123   | -2.377634 |
| 341 | 1 | 0 | 20.340428 | 5.536737   | -2.751067 |
| 342 | 6 | 0 | 22.003243 | 6.171151   | -3.786211 |

|     |   |   |           |           |           |
|-----|---|---|-----------|-----------|-----------|
| 343 | 1 | 0 | 21.316698 | 5.373366  | -0.053784 |
| 344 | 1 | 0 | 22.857492 | 4.422108  | 0.074084  |
| 345 | 1 | 0 | 22.876707 | 6.091300  | -0.635497 |
| 346 | 6 | 0 | 21.069576 | 6.952244  | -4.739660 |
| 347 | 8 | 0 | 23.231923 | 6.227760  | -3.906174 |
| 348 | 7 | 0 | 21.745431 | 8.205489  | -5.091716 |
| 349 | 6 | 0 | 20.744542 | 6.066263  | -5.918839 |
| 350 | 1 | 0 | 20.133907 | 7.201505  | -4.229808 |
| 351 | 6 | 0 | 21.105771 | 9.400491  | -5.131700 |
| 352 | 1 | 0 | 22.755524 | 8.155123  | -5.162120 |
| 353 | 1 | 0 | 20.087797 | 6.606049  | -6.644392 |
| 354 | 1 | 0 | 20.197844 | 5.162135  | -5.553549 |
| 355 | 1 | 0 | 21.668576 | 5.736689  | -6.452739 |
| 356 | 6 | 0 | 21.979743 | 10.613067 | -5.415717 |
| 357 | 8 | 0 | 19.884321 | 9.522983  | -4.952463 |
| 358 | 1 | 0 | 21.605222 | 11.110070 | -6.316191 |
| 359 | 1 | 0 | 21.881179 | 11.317575 | -4.583710 |
| 360 | 1 | 0 | 23.036276 | 10.364586 | -5.554460 |
| 361 | 8 | 0 | -0.571851 | 6.991494  | -0.254237 |
| 362 | 6 | 0 | -1.804310 | 7.097405  | -0.150562 |
| 363 | 6 | 0 | -2.527576 | 8.371560  | -0.647851 |
| 364 | 7 | 0 | -2.611235 | 6.141720  | 0.361017  |
| 365 | 7 | 0 | -1.910784 | 9.548186  | -0.018860 |
| 366 | 1 | 0 | -3.577589 | 8.357405  | -0.336646 |
| 367 | 6 | 0 | -2.453264 | 8.378276  | -2.156230 |
| 368 | 1 | 0 | -3.610561 | 6.336829  | 0.474634  |
| 369 | 6 | 0 | -2.082764 | 4.865346  | 0.867473  |
| 370 | 6 | 0 | -2.633049 | 10.442399 | 0.701023  |
| 371 | 1 | 0 | -0.912180 | 9.715527  | -0.163452 |
| 372 | 1 | 0 | -1.391517 | 8.376471  | -2.506317 |
| 373 | 1 | 0 | -2.960560 | 7.465067  | -2.552826 |
| 374 | 1 | 0 | -2.965151 | 9.279133  | -2.573237 |
| 375 | 6 | 0 | -2.800280 | 3.701176  | 0.144021  |
| 376 | 6 | 0 | -2.286612 | 4.673684  | 2.351506  |
| 377 | 1 | 0 | -1.011361 | 4.848950  | 0.643214  |
| 378 | 6 | 0 | -1.839590 | 11.602203 | 1.283389  |
| 379 | 8 | 0 | -3.856491 | 10.344102 | 0.897625  |
| 380 | 8 | 0 | -4.038439 | 3.626422  | 0.148649  |
| 381 | 7 | 0 | -1.986376 | 2.797204  | -0.443546 |
| 382 | 1 | 0 | -3.374515 | 4.671867  | 2.610221  |
| 383 | 1 | 0 | -1.845526 | 3.694524  | 2.659939  |
| 384 | 1 | 0 | -1.784172 | 5.488053  | 2.927695  |
| 385 | 1 | 0 | -2.300668 | 12.537837 | 0.950057  |

|     |   |   |           |            |           |
|-----|---|---|-----------|------------|-----------|
| 386 | 1 | 0 | -1.923956 | 11.564914  | 2.375004  |
| 387 | 1 | 0 | -0.786830 | 11.580382  | 0.991541  |
| 388 | 1 | 0 | -0.976952 | 2.968246   | -0.457326 |
| 389 | 6 | 0 | -2.509556 | 1.610756   | -1.139259 |
| 390 | 6 | 0 | -1.871872 | 0.348863   | -0.511326 |
| 391 | 1 | 0 | -3.594295 | 1.601211   | -0.991236 |
| 392 | 6 | 0 | -2.205503 | 1.592341   | -2.617887 |
| 393 | 8 | 0 | -0.637311 | 0.239773   | -0.439859 |
| 394 | 7 | 0 | -2.744592 | -0.589023  | -0.085068 |
| 395 | 1 | 0 | -1.102529 | 1.584221   | -2.801169 |
| 396 | 1 | 0 | -2.648956 | 0.673133   | -3.072843 |
| 397 | 1 | 0 | -2.644598 | 2.486873   | -3.122558 |
| 398 | 1 | 0 | -3.749394 | -0.391890  | -0.124844 |
| 399 | 6 | 0 | -2.297199 | -1.850576  | 0.525975  |
| 400 | 6 | 0 | -2.905188 | -3.032618  | -0.265521 |
| 401 | 1 | 0 | -1.204671 | -1.871290  | 0.459137  |
| 402 | 6 | 0 | -2.713880 | -2.004077  | 1.969117  |
| 403 | 8 | 0 | -4.131045 | -3.109859  | -0.437197 |
| 404 | 7 | 0 | -2.014902 | -3.945367  | -0.712210 |
| 405 | 1 | 0 | -3.827718 | -2.001404  | 2.067861  |
| 406 | 1 | 0 | -2.323942 | -2.974188  | 2.363275  |
| 407 | 1 | 0 | -2.298584 | -1.174265  | 2.590865  |
| 408 | 1 | 0 | -1.014330 | -3.771582  | -0.582912 |
| 409 | 6 | 0 | -2.430079 | -5.143289  | -1.459317 |
| 410 | 6 | 0 | -1.953664 | -6.399009  | -0.690600 |
| 411 | 1 | 0 | -3.523890 | -5.124552  | -1.513819 |
| 412 | 6 | 0 | -1.858739 | -5.212184  | -2.854555 |
| 413 | 8 | 0 | -0.752236 | -6.557619  | -0.421673 |
| 414 | 7 | 0 | -2.928420 | -7.274951  | -0.364674 |
| 415 | 1 | 0 | -2.173709 | -4.324785  | -3.455387 |
| 416 | 1 | 0 | -0.741343 | -5.248294  | -2.829183 |
| 417 | 1 | 0 | -2.232869 | -6.135876  | -3.360038 |
| 418 | 1 | 0 | -3.902597 | -7.050404  | -0.586734 |
| 419 | 6 | 0 | -2.646233 | -8.531921  | 0.349318  |
| 420 | 6 | 0 | -2.955754 | -9.723146  | -0.589228 |
| 421 | 1 | 0 | -1.579883 | -8.518604  | 0.601829  |
| 422 | 6 | 0 | -3.462475 | -8.699134  | 1.606427  |
| 423 | 8 | 0 | -4.108046 | -9.929969  | -1.004754 |
| 424 | 7 | 0 | -1.901792 | -10.495134 | -0.913229 |
| 425 | 1 | 0 | -3.273580 | -7.859787  | 2.318718  |
| 426 | 1 | 0 | -4.555782 | -8.729387  | 1.371568  |
| 427 | 1 | 0 | -3.180454 | -9.659462  | 2.103136  |
| 428 | 1 | 0 | -0.969644 | -10.263634 | -0.563254 |

|     |   |   |            |            |           |
|-----|---|---|------------|------------|-----------|
| 429 | 6 | 0 | -2.043300  | -11.644734 | -1.795158 |
| 430 | 1 | 0 | -1.090149  | -12.178279 | -1.825037 |
| 431 | 1 | 0 | -2.824014  | -12.321076 | -1.429872 |
| 432 | 1 | 0 | -2.311857  | -11.336091 | -2.813150 |
| 433 | 6 | 0 | -11.142512 | 11.069908  | 4.247027  |
| 434 | 6 | 0 | -12.000887 | 10.080139  | 3.474539  |
| 435 | 1 | 0 | -11.588133 | 12.065087  | 4.147809  |
| 436 | 1 | 0 | -11.174981 | 10.799306  | 5.308226  |
| 437 | 1 | 0 | -10.106311 | 11.086898  | 3.900825  |
| 438 | 8 | 0 | -13.221641 | 9.989390   | 3.692899  |
| 439 | 7 | 0 | -11.338807 | 9.318444   | 2.568287  |
| 440 | 1 | 0 | -10.343589 | 9.489510   | 2.405619  |
| 441 | 6 | 0 | -12.028464 | 8.314170   | 1.746535  |
| 442 | 6 | 0 | -11.288432 | 6.961875   | 1.870334  |
| 443 | 6 | 0 | -12.097307 | 8.663595   | 0.278562  |
| 444 | 1 | 0 | -13.045466 | 8.223935   | 2.142163  |
| 445 | 8 | 0 | -10.070483 | 6.885941   | 1.643534  |
| 446 | 7 | 0 | -12.071138 | 5.911421   | 2.202390  |
| 447 | 1 | 0 | -12.638270 | 9.629221   | 0.128214  |
| 448 | 1 | 0 | -11.074172 | 8.754008   | -0.162350 |
| 449 | 1 | 0 | -12.649678 | 7.858526   | -0.264995 |
| 450 | 1 | 0 | -13.049407 | 6.079090   | 2.457023  |
| 451 | 6 | 0 | -11.537408 | 4.547321   | 2.329979  |
| 452 | 6 | 0 | -12.315706 | 3.602094   | 1.381593  |
| 453 | 6 | 0 | -11.651016 | 3.983038   | 3.726196  |
| 454 | 1 | 0 | -10.482374 | 4.584900   | 2.039894  |
| 455 | 8 | 0 | -13.555028 | 3.551850   | 1.412112  |
| 456 | 7 | 0 | -11.543269 | 2.841853   | 0.574525  |
| 457 | 1 | 0 | -12.719538 | 3.922878   | 4.049881  |
| 458 | 1 | 0 | -11.214622 | 2.954554   | 3.743904  |
| 459 | 1 | 0 | -11.092947 | 4.619177   | 4.455335  |
| 460 | 1 | 0 | -10.531569 | 2.997527   | 0.561723  |
| 461 | 6 | 0 | -12.113363 | 1.847759   | -0.347535 |
| 462 | 6 | 0 | -11.479991 | 0.470206   | -0.039436 |
| 463 | 6 | 0 | -11.860582 | 2.155564   | -1.803760 |
| 464 | 1 | 0 | -13.192676 | 1.818350   | -0.166162 |
| 465 | 8 | 0 | -10.245966 | 0.338478   | -0.015320 |
| 466 | 7 | 0 | -12.357584 | -0.533516  | 0.173025  |
| 467 | 1 | 0 | -12.298875 | 3.145155   | -2.080007 |
| 468 | 1 | 0 | -10.764993 | 2.175911   | -2.025970 |
| 469 | 1 | 0 | -12.337575 | 1.366106   | -2.434495 |
| 470 | 1 | 0 | -13.361046 | -0.328149  | 0.188163  |
| 471 | 6 | 0 | -11.918957 | -1.909021  | 0.460184  |

|     |   |   |            |            |           |
|-----|---|---|------------|------------|-----------|
| 472 | 6 | 0 | -12.527721 | -2.852802  | -0.603978 |
| 473 | 6 | 0 | -12.349138 | -2.407538  | 1.818410  |
| 474 | 1 | 0 | -10.825986 | -1.918241  | 0.396789  |
| 475 | 8 | 0 | -13.755273 | -2.895433  | -0.774558 |
| 476 | 7 | 0 | -11.635954 | -3.600803  | -1.289458 |
| 477 | 1 | 0 | -11.937425 | -1.756820  | 2.627517  |
| 478 | 1 | 0 | -13.463936 | -2.423547  | 1.905178  |
| 479 | 1 | 0 | -11.965873 | -3.446584  | 1.966868  |
| 480 | 1 | 0 | -10.635456 | -3.469480  | -1.117422 |
| 481 | 6 | 0 | -12.049889 | -4.552155  | -2.332224 |
| 482 | 6 | 0 | -11.586350 | -5.973058  | -1.929937 |
| 483 | 6 | 0 | -11.467370 | -4.246573  | -3.690859 |
| 484 | 1 | 0 | -13.143177 | -4.513543  | -2.387904 |
| 485 | 8 | 0 | -10.394840 | -6.201622  | -1.667119 |
| 486 | 7 | 0 | -12.562179 | -6.906609  | -1.910143 |
| 487 | 1 | 0 | -11.775670 | -3.229141  | -4.033607 |
| 488 | 1 | 0 | -10.350314 | -4.292532  | -3.668421 |
| 489 | 1 | 0 | -11.839960 | -4.998952  | -4.428303 |
| 490 | 1 | 0 | -13.527771 | -6.627035  | -2.103392 |
| 491 | 6 | 0 | -12.292062 | -8.314194  | -1.575216 |
| 492 | 6 | 0 | -12.544882 | -9.190633  | -2.825507 |
| 493 | 6 | 0 | -13.159449 | -8.837173  | -0.457029 |
| 494 | 1 | 0 | -11.238421 | -8.372814  | -1.279638 |
| 495 | 8 | 0 | -13.657125 | -9.209441  | -3.377846 |
| 496 | 7 | 0 | -11.494291 | -9.920101  | -3.245187 |
| 497 | 1 | 0 | -12.885017 | -9.899249  | -0.244474 |
| 498 | 1 | 0 | -13.012831 | -8.237643  | 0.473934  |
| 499 | 1 | 0 | -14.241205 | -8.799610  | -0.739020 |
| 500 | 1 | 0 | -10.585966 | -9.814614  | -2.787840 |
| 501 | 6 | 0 | -11.587572 | -10.799389 | -4.401433 |
| 502 | 1 | 0 | -10.739447 | -11.488939 | -4.386666 |
| 503 | 1 | 0 | -12.520283 | -11.370830 | -4.367295 |
| 504 | 1 | 0 | -11.568444 | -10.234243 | -5.342630 |
| 505 | 8 | 0 | -8.933947  | -9.702831  | -2.065603 |
| 506 | 6 | 0 | -7.789084  | -9.556291  | -1.606136 |
| 507 | 7 | 0 | -6.734241  | -10.294151 | -1.998666 |
| 508 | 6 | 0 | -7.493031  | -8.488455  | -0.525742 |
| 509 | 1 | 0 | -5.806435  | -10.110703 | -1.610603 |
| 510 | 6 | 0 | -6.866814  | -11.329895 | -3.013086 |
| 511 | 6 | 0 | -8.330800  | -8.805093  | 0.687849  |
| 512 | 1 | 0 | -6.431034  | -8.510052  | -0.255890 |
| 513 | 7 | 0 | -7.759918  | -7.152025  | -1.084503 |
| 514 | 1 | 0 | -5.905216  | -11.838474 | -3.116431 |

|     |   |   |           |            |           |
|-----|---|---|-----------|------------|-----------|
| 515 | 1 | 0 | -7.631655 | -12.060689 | -2.726986 |
| 516 | 1 | 0 | -7.152295 | -10.903269 | -3.982523 |
| 517 | 1 | 0 | -8.058439 | -9.819739  | 1.068358  |
| 518 | 1 | 0 | -8.152940 | -8.059544  | 1.500293  |
| 519 | 1 | 0 | -9.419964 | -8.802832  | 0.432784  |
| 520 | 1 | 0 | -8.729215 | -6.894074  | -1.291303 |
| 521 | 6 | 0 | -6.776415 | -6.247079  | -1.279789 |
| 522 | 8 | 0 | -5.580603 | -6.446056  | -1.013087 |
| 523 | 6 | 0 | -7.235221 | -4.901852  | -1.891501 |
| 524 | 6 | 0 | -6.644620 | -4.800901  | -3.276835 |
| 525 | 1 | 0 | -8.328072 | -4.868800  | -1.957161 |
| 526 | 7 | 0 | -6.823712 | -3.809338  | -0.995602 |
| 527 | 1 | 0 | -6.946370 | -3.843561  | -3.766839 |
| 528 | 1 | 0 | -5.527864 | -4.847611  | -3.241170 |
| 529 | 1 | 0 | -7.016464 | -5.651964  | -3.898193 |
| 530 | 1 | 0 | -5.823931 | -3.660860  | -0.832815 |
| 531 | 6 | 0 | -7.715362 | -2.950853  | -0.454504 |
| 532 | 8 | 0 | -8.938449 | -2.995969  | -0.653444 |
| 533 | 6 | 0 | -7.113832 | -1.877737  | 0.483897  |
| 534 | 6 | 0 | -7.552794 | -2.202699  | 1.891342  |
| 535 | 1 | 0 | -6.020462 | -1.895705  | 0.429935  |
| 536 | 7 | 0 | -7.549563 | -0.549480  | 0.024516  |
| 537 | 1 | 0 | -7.144652 | -1.456353  | 2.615230  |
| 538 | 1 | 0 | -7.171999 | -3.215358  | 2.170709  |
| 539 | 1 | 0 | -8.668101 | -2.206362  | 1.973106  |
| 540 | 1 | 0 | -8.552493 | -0.339566  | 0.016475  |
| 541 | 6 | 0 | -6.669468 | 0.416140   | -0.314673 |
| 542 | 8 | 0 | -5.435692 | 0.285158   | -0.272094 |
| 543 | 6 | 0 | -7.298958 | 1.743669   | -0.799248 |
| 544 | 6 | 0 | -7.001951 | 1.881688   | -2.272937 |
| 545 | 1 | 0 | -8.383093 | 1.727581   | -0.646740 |
| 546 | 7 | 0 | -6.763265 | 2.844923   | 0.016441  |
| 547 | 1 | 0 | -7.434626 | 2.829233   | -2.676193 |
| 548 | 1 | 0 | -7.456030 | 1.020719   | -2.821658 |
| 549 | 1 | 0 | -5.899867 | 1.883376   | -2.461939 |
| 550 | 1 | 0 | -5.753598 | 3.015250   | 0.009269  |
| 551 | 6 | 0 | -7.567214 | 3.677102   | 0.713487  |
| 552 | 8 | 0 | -8.805283 | 3.601711   | 0.727646  |
| 553 | 6 | 0 | -6.835801 | 4.752219   | 1.552320  |
| 554 | 6 | 0 | -7.019074 | 4.395041   | 3.008178  |
| 555 | 1 | 0 | -5.767832 | 4.759049   | 1.311528  |
| 556 | 7 | 0 | -7.365553 | 6.079398   | 1.201838  |
| 557 | 1 | 0 | -8.103245 | 4.366717   | 3.280999  |



|     |   |   |            |           |           |
|-----|---|---|------------|-----------|-----------|
| 558 | 1 | 0 | -6.577604  | 3.386293  | 3.197841  |
| 559 | 1 | 0 | -6.505202  | 5.138037  | 3.665078  |
| 560 | 6 | 0 | -6.562819  | 7.079696  | 0.776209  |
| 561 | 1 | 0 | -8.359123  | 6.268095  | 1.366075  |
| 562 | 6 | 0 | -7.283916  | 8.409689  | 0.450704  |
| 563 | 8 | 0 | -5.335298  | 6.975961  | 0.624224  |
| 564 | 7 | 0 | -6.639860  | 9.496922  | 1.201630  |
| 565 | 6 | 0 | -7.241788  | 8.597810  | -1.046880 |
| 566 | 1 | 0 | -8.326767  | 8.366710  | 0.782751  |
| 567 | 1 | 0 | -5.647998  | 9.685581  | 1.037954  |
| 568 | 6 | 0 | -7.326827  | 10.279713 | 2.070117  |
| 569 | 1 | 0 | -7.751906  | 9.546914  | -1.340866 |
| 570 | 1 | 0 | -6.187695  | 8.628803  | -1.418306 |
| 571 | 1 | 0 | -7.767732  | 7.743580  | -1.539074 |
| 572 | 8 | 0 | -8.540364  | 10.150797 | 2.305996  |
| 573 | 6 | 0 | -6.503629  | 11.348948 | 2.772462  |
| 574 | 1 | 0 | -6.988290  | 12.318029 | 2.614901  |
| 575 | 1 | 0 | -6.518684  | 11.144512 | 3.848730  |
| 576 | 1 | 0 | -5.470675  | 11.384725 | 2.417768  |
| 577 | 8 | 0 | -19.541733 | 6.552119  | 2.869977  |
| 578 | 6 | 0 | -20.609545 | 6.703803  | 3.484451  |
| 579 | 6 | 0 | -21.168076 | 8.113463  | 3.797104  |
| 580 | 7 | 0 | -21.352574 | 5.684380  | 3.976257  |
| 581 | 7 | 0 | -20.627500 | 8.547419  | 5.096909  |
| 582 | 1 | 0 | -22.258474 | 8.058096  | 3.907645  |
| 583 | 6 | 0 | -20.812516 | 9.046879  | 2.672104  |
| 584 | 1 | 0 | -22.139274 | 5.922890  | 4.573807  |
| 585 | 6 | 0 | -20.920987 | 4.280738  | 3.888093  |
| 586 | 6 | 0 | -21.240891 | 8.174742  | 6.252943  |
| 587 | 1 | 0 | -19.684100 | 8.943149  | 5.106281  |
| 588 | 1 | 0 | -19.702339 | 9.135205  | 2.560325  |
| 589 | 1 | 0 | -21.230424 | 8.644921  | 1.717026  |
| 590 | 1 | 0 | -21.236700 | 10.064228 | 2.852555  |
| 591 | 6 | 0 | -21.837748 | 3.501550  | 2.905930  |
| 592 | 6 | 0 | -20.960855 | 3.565209  | 5.215972  |
| 593 | 1 | 0 | -19.893523 | 4.286511  | 3.508831  |
| 594 | 6 | 0 | -20.561638 | 8.651177  | 7.528726  |
| 595 | 8 | 0 | -22.287809 | 7.510876  | 6.277712  |
| 596 | 8 | 0 | -23.066201 | 3.566807  | 2.973932  |
| 597 | 7 | 0 | -21.158418 | 2.716801  | 2.019778  |
| 598 | 1 | 0 | -21.998446 | 3.538442  | 5.631626  |
| 599 | 1 | 0 | -20.607910 | 2.514077  | 5.075316  |
| 600 | 1 | 0 | -20.292524 | 4.066948  | 5.957378  |

|     |   |   |            |           |           |
|-----|---|---|------------|-----------|-----------|
| 601 | 1 | 0 | -21.237790 | 9.340085  | 8.046480  |
| 602 | 1 | 0 | -20.402306 | 7.789982  | 8.185148  |
| 603 | 1 | 0 | -19.608428 | 9.152348  | 7.337016  |
| 604 | 1 | 0 | -20.145373 | 2.812785  | 1.931087  |
| 605 | 6 | 0 | -21.870988 | 1.891613  | 1.043645  |
| 606 | 6 | 0 | -21.114107 | 0.557111  | 0.859974  |
| 607 | 1 | 0 | -22.871218 | 1.712234  | 1.458511  |
| 608 | 6 | 0 | -22.036980 | 2.521692  | -0.321032 |
| 609 | 8 | 0 | -19.876238 | 0.508492  | 0.889715  |
| 610 | 7 | 0 | -21.895271 | -0.525464 | 0.633127  |
| 611 | 1 | 0 | -21.047533 | 2.729715  | -0.796130 |
| 612 | 1 | 0 | -22.614113 | 1.831647  | -0.983640 |
| 613 | 1 | 0 | -22.598136 | 3.484602  | -0.236341 |
| 614 | 1 | 0 | -22.902216 | -0.427697 | 0.561410  |
| 615 | 6 | 0 | -21.343963 | -1.848214 | 0.313712  |
| 616 | 6 | 0 | -22.123831 | -2.420846 | -0.892635 |
| 617 | 1 | 0 | -20.290461 | -1.715706 | 0.049688  |
| 618 | 6 | 0 | -21.429000 | -2.841647 | 1.448122  |
| 619 | 8 | 0 | -23.327343 | -2.192337 | -1.045604 |
| 620 | 7 | 0 | -21.377268 | -3.213934 | -1.705373 |
| 621 | 1 | 0 | -22.488350 | -3.039210 | 1.742297  |
| 622 | 1 | 0 | -20.960578 | -3.803909 | 1.125414  |
| 623 | 1 | 0 | -20.876380 | -2.462442 | 2.342491  |
| 624 | 1 | 0 | -20.361112 | -3.226371 | -1.599224 |
| 625 | 6 | 0 | -21.962812 | -3.895884 | -2.860071 |
| 626 | 6 | 0 | -21.205665 | -5.225350 | -3.079595 |
| 627 | 1 | 0 | -23.014782 | -4.094613 | -2.617244 |
| 628 | 6 | 0 | -21.924687 | -3.109518 | -4.150758 |
| 629 | 8 | 0 | -20.011909 | -5.343042 | -2.765756 |
| 630 | 7 | 0 | -21.930025 | -6.213785 | -3.649454 |
| 631 | 1 | 0 | -22.470235 | -2.141445 | -4.027415 |
| 632 | 1 | 0 | -20.875531 | -2.886736 | -4.462878 |
| 633 | 1 | 0 | -22.422369 | -3.694455 | -4.962403 |
| 634 | 1 | 0 | -22.870008 | -6.030191 | -3.986770 |
| 635 | 6 | 0 | -21.336062 | -7.482407 | -4.092880 |
| 636 | 6 | 0 | -21.761019 | -7.714561 | -5.563783 |
| 637 | 1 | 0 | -20.248330 | -7.384907 | -4.025256 |
| 638 | 6 | 0 | -21.761715 | -8.677941 | -3.276153 |
| 639 | 8 | 0 | -22.872513 | -7.353425 | -5.963510 |
| 640 | 7 | 0 | -20.826703 | -8.352192 | -6.310966 |
| 641 | 1 | 0 | -21.496334 | -8.535908 | -2.199925 |
| 642 | 1 | 0 | -22.862624 | -8.853022 | -3.349923 |
| 643 | 1 | 0 | -21.228013 | -9.583837 | -3.655937 |

|     |   |   |            |           |           |
|-----|---|---|------------|-----------|-----------|
| 644 | 1 | 0 | -19.902195 | -8.488400 | -5.902443 |
| 645 | 6 | 0 | -21.047806 | -8.691786 | -7.707924 |
| 646 | 1 | 0 | -20.822136 | -9.749741 | -7.888105 |
| 647 | 1 | 0 | -22.096415 | -8.501778 | -7.946200 |
| 648 | 1 | 0 | -20.420196 | -8.081426 | -8.370373 |
| 649 | 8 | 0 | -14.710204 | 6.694098  | 2.926002  |
| 650 | 6 | 0 | -15.946579 | 6.798414  | 2.878241  |
| 651 | 6 | 0 | -16.606811 | 8.194965  | 2.752940  |
| 652 | 7 | 0 | -16.796854 | 5.749641  | 2.903311  |
| 653 | 7 | 0 | -16.002608 | 9.102227  | 3.738800  |
| 654 | 1 | 0 | -17.676012 | 8.129228  | 2.980258  |
| 655 | 6 | 0 | -16.431855 | 8.654842  | 1.325321  |
| 656 | 1 | 0 | -17.808601 | 5.918576  | 2.899558  |
| 657 | 6 | 0 | -16.314017 | 4.364175  | 3.045534  |
| 658 | 6 | 0 | -16.711151 | 9.654833  | 4.752856  |
| 659 | 1 | 0 | -15.005274 | 9.315762  | 3.657098  |
| 660 | 1 | 0 | -15.349122 | 8.721384  | 1.052836  |
| 661 | 1 | 0 | -16.928503 | 7.923559  | 0.641565  |
| 662 | 1 | 0 | -16.899611 | 9.657743  | 1.173445  |
| 663 | 6 | 0 | -17.083918 | 3.474036  | 2.044836  |
| 664 | 6 | 0 | -16.520918 | 3.786695  | 4.425993  |
| 665 | 1 | 0 | -15.244476 | 4.369912  | 2.813123  |
| 666 | 6 | 0 | -15.911927 | 10.541451 | 5.695824  |
| 667 | 8 | 0 | -17.926377 | 9.463609  | 4.932789  |
| 668 | 8 | 0 | -18.319906 | 3.401632  | 2.088969  |
| 669 | 7 | 0 | -16.314317 | 2.791542  | 1.165115  |
| 670 | 1 | 0 | -17.608155 | 3.743674  | 4.684671  |
| 671 | 1 | 0 | -16.107823 | 2.748945  | 4.455493  |
| 672 | 1 | 0 | -15.993582 | 4.401966  | 5.194652  |
| 673 | 1 | 0 | -16.417159 | 11.509758 | 5.771800  |
| 674 | 1 | 0 | -15.923568 | 10.085035 | 6.691911  |
| 675 | 1 | 0 | -14.878735 | 10.680823 | 5.368285  |
| 676 | 1 | 0 | -15.304603 | 2.956105  | 1.151667  |
| 677 | 6 | 0 | -16.911886 | 1.910359  | 0.150992  |
| 678 | 6 | 0 | -16.296458 | 0.497140  | 0.272174  |
| 679 | 1 | 0 | -17.985998 | 1.876662  | 0.359896  |
| 680 | 6 | 0 | -16.693248 | 2.380235  | -1.267537 |
| 681 | 8 | 0 | -15.066704 | 0.337459  | 0.230913  |
| 682 | 7 | 0 | -17.191882 | -0.509348 | 0.385616  |
| 683 | 1 | 0 | -15.603798 | 2.414969  | -1.516173 |
| 684 | 1 | 0 | -17.196635 | 1.673150  | -1.971220 |
| 685 | 1 | 0 | -17.126107 | 3.399136  | -1.416772 |
| 686 | 1 | 0 | -18.181238 | -0.278571 | 0.508755  |

|     |   |   |            |            |           |
|-----|---|---|------------|------------|-----------|
| 687 | 6 | 0 | -16.782758 | -1.922686  | 0.448641  |
| 688 | 6 | 0 | -17.356209 | -2.674171  | -0.780590 |
| 689 | 1 | 0 | -15.687794 | -1.941119  | 0.426998  |
| 690 | 6 | 0 | -17.277518 | -2.632460  | 1.685442  |
| 691 | 8 | 0 | -18.569980 | -2.632410  | -1.032142 |
| 692 | 7 | 0 | -16.454118 | -3.374728  | -1.505254 |
| 693 | 1 | 0 | -18.396421 | -2.647508  | 1.719534  |
| 694 | 1 | 0 | -16.908296 | -3.687071  | 1.676519  |
| 695 | 1 | 0 | -16.899785 | -2.130403  | 2.608964  |
| 696 | 1 | 0 | -15.456940 | -3.282910  | -1.292231 |
| 697 | 6 | 0 | -16.851207 | -4.115903  | -2.712555 |
| 698 | 6 | 0 | -16.379599 | -5.585758  | -2.605351 |
| 699 | 1 | 0 | -17.943895 | -4.071958  | -2.761047 |
| 700 | 6 | 0 | -16.272415 | -3.549887  | -3.987774 |
| 701 | 8 | 0 | -15.187051 | -5.862476  | -2.403466 |
| 702 | 7 | 0 | -17.352724 | -6.506708  | -2.788449 |
| 703 | 1 | 0 | -16.591570 | -2.488910  | -4.129650 |
| 704 | 1 | 0 | -15.154973 | -3.587844  | -3.972453 |
| 705 | 1 | 0 | -16.636981 | -4.150350  | -4.856749 |
| 706 | 1 | 0 | -18.324775 | -6.193068  | -2.853938 |
| 707 | 6 | 0 | -17.075024 | -7.953465  | -2.797107 |
| 708 | 6 | 0 | -17.218233 | -8.501668  | -4.241696 |
| 709 | 1 | 0 | -16.042323 | -8.080252  | -2.451970 |
| 710 | 6 | 0 | -18.006342 | -8.739495  | -1.908623 |
| 711 | 8 | 0 | -18.297091 | -8.428878  | -4.854186 |
| 712 | 7 | 0 | -16.108634 | -9.056516  | -4.762870 |
| 713 | 1 | 0 | -17.953972 | -8.375462  | -0.853911 |
| 714 | 1 | 0 | -19.065359 | -8.655791  | -2.263545 |
| 715 | 1 | 0 | -17.711288 | -9.817072  | -1.928906 |
| 716 | 1 | 0 | -15.240664 | -9.073055  | -4.223399 |
| 717 | 6 | 0 | -16.099983 | -9.616140  | -6.106872 |
| 718 | 1 | 0 | -15.104996 | -10.021333 | -6.306668 |
| 719 | 1 | 0 | -16.841161 | -10.417988 | -6.204459 |
| 720 | 1 | 0 | -16.332512 | -8.849910  | -6.855931 |

AP PI (Ac-AAAAAA-NHMe)<sub>2</sub>

|    |   |   |            |           |           |
|----|---|---|------------|-----------|-----------|
| 1  | 6 | 0 | -5.937775  | 2.071814  | 0.877046  |
| 2  | 7 | 0 | -4.618412  | 2.670245  | 0.632300  |
| 3  | 1 | 0 | -4.637017  | 3.648434  | 0.359744  |
| 4  | 6 | 0 | -3.481031  | 1.949095  | 0.489925  |
| 5  | 8 | 0 | -3.402938  | 0.730615  | 0.688802  |
| 6  | 6 | 0 | -2.260438  | 2.774791  | 0.020121  |
| 7  | 7 | 0 | -1.041331  | 2.107101  | 0.483842  |
| 8  | 1 | 0 | -1.045788  | 1.087358  | 0.546298  |
| 9  | 6 | 0 | -6.929904  | 2.729985  | -0.114701 |
| 10 | 8 | 0 | -6.765100  | 3.894016  | -0.496603 |
| 11 | 7 | 0 | -7.971768  | 1.936328  | -0.471628 |
| 12 | 1 | 0 | -7.946105  | 0.940173  | -0.228164 |
| 13 | 6 | 0 | -8.994114  | 2.399039  | -1.416339 |
| 14 | 6 | 0 | -10.376133 | 1.917998  | -0.920234 |
| 15 | 8 | 0 | -10.587019 | 0.733620  | -0.641175 |
| 16 | 7 | 0 | -11.331830 | 2.883120  | -0.848451 |
| 17 | 1 | 0 | -11.055733 | 3.838011  | -1.032517 |
| 18 | 1 | 0 | -5.869101  | 0.997044  | 0.685331  |
| 19 | 1 | 0 | -8.930611  | 3.494186  | -1.426076 |
| 20 | 6 | 0 | 2.187764   | -1.901700 | 0.597228  |
| 21 | 6 | 0 | 3.360313   | -2.768647 | 0.080770  |
| 22 | 8 | 0 | 3.192891   | -3.954589 | -0.225728 |
| 23 | 7 | 0 | 4.545534   | -2.119535 | 0.018245  |
| 24 | 1 | 0 | 4.597904   | -1.116557 | 0.203881  |
| 25 | 6 | 0 | 5.775888   | -2.789822 | -0.410639 |
| 26 | 6 | 0 | 6.961096   | -1.880431 | -0.007388 |
| 27 | 8 | 0 | 6.794566   | -0.673719 | 0.219073  |
| 28 | 7 | 0 | 8.160254   | -2.495838 | 0.056804  |
| 29 | 1 | 0 | 8.269796   | -3.474110 | -0.199821 |
| 30 | 7 | 0 | 0.949522   | -2.613759 | 0.265055  |
| 31 | 1 | 0 | 1.070894   | -3.594006 | 0.021144  |
| 32 | 6 | 0 | -0.249054  | -1.998362 | 0.221073  |
| 33 | 8 | 0 | -0.407798  | -0.802671 | 0.509367  |
| 34 | 6 | 0 | -1.430322  | -2.873200 | -0.251533 |
| 35 | 7 | 0 | -2.665286  | -2.264360 | 0.250619  |
| 36 | 1 | 0 | -2.651267  | -1.264176 | 0.453826  |
| 37 | 1 | 0 | 2.199343   | -0.942793 | 0.067380  |
| 38 | 1 | 0 | 5.849568   | -3.748461 | 0.122327  |
| 39 | 1 | 0 | -1.346601  | -3.878148 | 0.185360  |
| 40 | 6 | 0 | 1.306481   | 1.948140  | 1.155402  |
| 41 | 7 | 0 | 2.530450   | 2.672311  | 0.789034  |

|    |   |   |            |           |           |
|----|---|---|------------|-----------|-----------|
| 42 | 1 | 0 | 2.398818   | 3.670008  | 0.640391  |
| 43 | 6 | 0 | 3.694401   | 2.063116  | 0.475547  |
| 44 | 8 | 0 | 3.877700   | 0.841764  | 0.566912  |
| 45 | 6 | 0 | 4.805700   | 3.007353  | -0.040990 |
| 46 | 7 | 0 | 6.087049   | 2.308731  | 0.094455  |
| 47 | 1 | 0 | 6.067055   | 1.290834  | 0.177348  |
| 48 | 6 | 0 | 7.264212   | 2.968642  | -0.006928 |
| 49 | 8 | 0 | 7.364914   | 4.185043  | -0.207318 |
| 50 | 6 | 0 | 0.117116   | 2.792407  | 0.634598  |
| 51 | 8 | 0 | 0.249131   | 4.001871  | 0.413808  |
| 52 | 1 | 0 | 1.308307   | 0.971539  | 0.660883  |
| 53 | 1 | 0 | 4.839766   | 3.910372  | 0.585050  |
| 54 | 6 | 0 | -5.020902  | -2.188541 | 0.895839  |
| 55 | 6 | 0 | -3.831805  | -2.955671 | 0.272467  |
| 56 | 8 | 0 | -3.960202  | -4.117272 | -0.126885 |
| 57 | 7 | 0 | -6.249353  | -2.729638 | 0.299890  |
| 58 | 1 | 0 | -6.223795  | -3.716487 | 0.063037  |
| 59 | 6 | 0 | -7.317587  | -1.967025 | -0.013650 |
| 60 | 8 | 0 | -7.373108  | -0.752067 | 0.235136  |
| 61 | 6 | 0 | -8.468756  | -2.690644 | -0.752435 |
| 62 | 7 | 0 | -9.755954  | -2.150857 | -0.320983 |
| 63 | 1 | 0 | -9.944696  | -1.160195 | -0.460802 |
| 64 | 6 | 0 | -10.634576 | -2.916551 | 0.399000  |
| 65 | 8 | 0 | -10.432393 | -4.101831 | 0.671897  |
| 66 | 1 | 0 | -4.955724  | -1.125069 | 0.644822  |
| 67 | 1 | 0 | -8.484731  | -3.752775 | -0.475577 |
| 68 | 6 | 0 | -11.901456 | -2.193483 | 0.837829  |
| 69 | 1 | 0 | -11.915122 | -1.140547 | 0.543367  |
| 70 | 1 | 0 | -12.763501 | -2.710442 | 0.403200  |
| 71 | 1 | 0 | -11.985584 | -2.274105 | 1.926344  |
| 72 | 6 | 0 | -12.702838 | 2.621264  | -0.428317 |
| 73 | 1 | 0 | -12.854110 | 1.540390  | -0.422215 |
| 74 | 1 | 0 | -12.892478 | 3.009429  | 0.580122  |
| 75 | 1 | 0 | -13.409801 | 3.081263  | -1.127366 |
| 76 | 6 | 0 | 9.424686   | -1.785219 | 0.289027  |
| 77 | 1 | 0 | 9.314702   | -0.753044 | -0.058541 |
| 78 | 6 | 0 | 8.521660   | 2.080379  | 0.160837  |
| 79 | 1 | 0 | 8.416301   | 1.199573  | -0.483369 |
| 80 | 1 | 0 | 9.470009   | 3.868289  | -0.400858 |
| 81 | 6 | 0 | 10.861977  | 2.337732  | -0.615109 |
| 82 | 6 | 0 | 11.922096  | 3.307885  | -1.111974 |
| 83 | 1 | 0 | 11.573800  | 4.344001  | -1.157799 |
| 84 | 1 | 0 | 12.790027  | 3.249052  | -0.447384 |

|     |   |   |           |           |           |
|-----|---|---|-----------|-----------|-----------|
| 85  | 1 | 0 | 12.246810 | 2.992397  | -2.108672 |
| 86  | 8 | 0 | 11.099836 | 1.122196  | -0.515849 |
| 87  | 7 | 0 | 9.662461  | 2.875371  | -0.301328 |
| 88  | 6 | 0 | 10.509537 | -2.514224 | -0.542395 |
| 89  | 1 | 0 | 11.490962 | -0.727950 | -0.716469 |
| 90  | 6 | 0 | 12.695040 | -2.243049 | -1.639671 |
| 91  | 1 | 0 | 13.633478 | -1.969999 | -1.143064 |
| 92  | 1 | 0 | 12.615910 | -3.330860 | -1.689353 |
| 93  | 1 | 0 | 12.710155 | -1.843134 | -2.661721 |
| 94  | 8 | 0 | 10.388977 | -3.714306 | -0.814720 |
| 95  | 7 | 0 | 11.556539 | -1.731645 | -0.891511 |
| 96  | 6 | 0 | 9.860289  | -1.747520 | 1.733819  |
| 97  | 1 | 0 | 9.081705  | -1.247610 | 2.362004  |
| 98  | 1 | 0 | 10.038157 | -2.773919 | 2.136636  |
| 99  | 1 | 0 | 10.808393 | -1.160269 | 1.814303  |
| 100 | 6 | 0 | 8.625148  | 1.597408  | 1.586405  |
| 101 | 1 | 0 | 8.585778  | 2.443085  | 2.313729  |
| 102 | 1 | 0 | 7.782493  | 0.891381  | 1.798365  |
| 103 | 1 | 0 | 9.586211  | 1.041668  | 1.734108  |
| 104 | 6 | 0 | 4.473129  | 3.441298  | -1.450015 |
| 105 | 1 | 0 | 4.347843  | 2.565340  | -2.131254 |
| 106 | 1 | 0 | 3.526064  | 4.033905  | -1.452117 |
| 107 | 1 | 0 | 5.293628  | 4.088847  | -1.850694 |
| 108 | 6 | 0 | 5.852363  | -3.081900 | -1.890911 |
| 109 | 1 | 0 | 4.974524  | -3.703499 | -2.200594 |
| 110 | 1 | 0 | 5.853535  | -2.143281 | -2.495974 |
| 111 | 1 | 0 | 6.785384  | -3.653536 | -2.116863 |
| 112 | 6 | 0 | 2.371257  | -1.613255 | 2.066908  |
| 113 | 1 | 0 | 1.473611  | -1.076110 | 2.466754  |
| 114 | 1 | 0 | 2.520859  | -2.548697 | 2.657062  |
| 115 | 1 | 0 | 3.260792  | -0.947193 | 2.201856  |
| 116 | 6 | 0 | 1.137185  | 1.714441  | 2.636773  |
| 117 | 1 | 0 | 1.032951  | 2.674644  | 3.197113  |
| 118 | 1 | 0 | 0.221636  | 1.094606  | 2.806012  |
| 119 | 1 | 0 | 2.018115  | 1.158120  | 3.044134  |
| 120 | 6 | 0 | -1.362642 | -3.022728 | -1.753866 |
| 121 | 1 | 0 | -2.228990 | -3.633437 | -2.113096 |
| 122 | 1 | 0 | -1.389255 | -2.031457 | -2.267375 |
| 123 | 1 | 0 | -0.418432 | -3.547471 | -2.038924 |
| 124 | 6 | 0 | -2.349312 | 2.956276  | -1.478025 |
| 125 | 1 | 0 | -2.367394 | 1.974250  | -2.009774 |
| 126 | 1 | 0 | -3.279683 | 3.518908  | -1.735596 |
| 127 | 1 | 0 | -1.470151 | 3.542745  | -1.844519 |

|     |   |   |           |           |           |
|-----|---|---|-----------|-----------|-----------|
| 128 | 6 | 0 | -4.947871 | -2.324707 | 2.397855  |
| 129 | 1 | 0 | -4.949521 | -3.396469 | 2.712978  |
| 130 | 1 | 0 | -4.007681 | -1.843713 | 2.764004  |
| 131 | 1 | 0 | -5.817457 | -1.813340 | 2.878845  |
| 132 | 6 | 0 | -6.457999 | 2.272721  | 2.279255  |
| 133 | 1 | 0 | -6.604831 | 3.355496  | 2.511410  |
| 134 | 1 | 0 | -7.438975 | 1.746096  | 2.381218  |
| 135 | 1 | 0 | -5.747026 | 1.843891  | 3.027103  |
| 136 | 6 | 0 | -8.212582 | -2.572472 | -2.236222 |
| 137 | 1 | 0 | -8.201511 | -1.503529 | -2.563254 |
| 138 | 1 | 0 | -7.223209 | -3.031016 | -2.480152 |
| 139 | 1 | 0 | -9.004512 | -3.109246 | -2.813647 |
| 140 | 6 | 0 | -8.813329 | 1.896960  | -2.830134 |
| 141 | 1 | 0 | -7.832281 | 2.235019  | -3.244198 |
| 142 | 1 | 0 | -8.851707 | 0.780009  | -2.869540 |
| 143 | 1 | 0 | -9.630204 | 2.302654  | -3.475407 |
| 144 | 1 | 0 | -2.282942 | 3.771734  | 0.479611  |





AP PI (Ac-AAAAAA-NHMe)<sub>3</sub>

|    |   |   |           |           |           |
|----|---|---|-----------|-----------|-----------|
| 1  | 6 | 0 | 5.731049  | -0.006912 | -0.856261 |
| 2  | 7 | 0 | 4.458378  | 0.376309  | -0.221624 |
| 3  | 1 | 0 | 4.364735  | 1.333566  | 0.123602  |
| 4  | 6 | 0 | 3.406807  | -0.467209 | -0.147845 |
| 5  | 8 | 0 | 3.393963  | -1.612215 | -0.625217 |
| 6  | 6 | 0 | 2.194689  | 0.072248  | 0.647002  |
| 7  | 7 | 0 | 0.956723  | -0.351953 | -0.025439 |
| 8  | 1 | 0 | 0.868407  | -1.336251 | -0.293059 |
| 9  | 6 | 0 | 6.883824  | 0.510713  | 0.033734  |
| 10 | 8 | 0 | 6.849413  | 1.661350  | 0.502434  |
| 11 | 7 | 0 | 7.904914  | -0.351960 | 0.217575  |
| 12 | 1 | 0 | 7.819018  | -1.313820 | -0.130438 |
| 13 | 6 | 0 | 9.086137  | -0.003796 | 1.025175  |
| 14 | 6 | 0 | 10.363213 | -0.401290 | 0.248317  |
| 15 | 8 | 0 | 10.495353 | -1.542122 | -0.222084 |
| 16 | 7 | 0 | 11.309171 | 0.554004  | 0.157609  |
| 17 | 1 | 0 | 11.130000 | 1.500628  | 0.497325  |
| 18 | 1 | 0 | 5.757661  | -1.098918 | -0.916975 |
| 19 | 1 | 0 | 9.051427  | 1.078854  | 1.190196  |
| 20 | 6 | 0 | -2.179413 | -4.574432 | -0.876619 |
| 21 | 6 | 0 | -3.205897 | -5.239424 | 0.072455  |
| 22 | 8 | 0 | -3.018510 | -6.376837 | 0.516115  |
| 23 | 7 | 0 | -4.306866 | -4.485387 | 0.313828  |
| 24 | 1 | 0 | -4.310827 | -3.499854 | 0.040991  |
| 25 | 6 | 0 | -5.404084 | -4.972537 | 1.152216  |
| 26 | 6 | 0 | -6.711913 | -4.301007 | 0.675552  |
| 27 | 8 | 0 | -6.703709 | -3.178024 | 0.150055  |
| 28 | 7 | 0 | -7.837683 | -5.011690 | 0.897585  |
| 29 | 1 | 0 | -7.801388 | -5.876874 | 1.428901  |
| 30 | 7 | 0 | -0.853509 | -5.102855 | -0.528567 |
| 31 | 1 | 0 | -0.835730 | -6.073862 | -0.232849 |
| 32 | 6 | 0 | 0.241574  | -4.323990 | -0.393120 |
| 33 | 8 | 0 | 0.251967  | -3.110232 | -0.646998 |
| 34 | 6 | 0 | 1.500968  | -5.042490 | 0.140549  |
| 35 | 7 | 0 | 2.674760  | -4.453097 | -0.506704 |
| 36 | 1 | 0 | 2.718143  | -3.435056 | -0.591146 |
| 37 | 1 | 0 | -2.165117 | -3.491197 | -0.721955 |
| 38 | 1 | 0 | -5.462035 | -6.059894 | 1.014099  |
| 39 | 1 | 0 | 1.486257  | -6.105270 | -0.131942 |
| 40 | 6 | 0 | -1.297364 | -0.123672 | -0.948884 |
| 41 | 7 | 0 | -2.543022 | 0.335362  | -0.313833 |

|    |   |   |            |           |           |
|----|---|---|------------|-----------|-----------|
| 42 | 1 | 0 | -2.639150  | 1.332460  | -0.110569 |
| 43 | 6 | 0 | -3.583050  | -0.493897 | -0.076358 |
| 44 | 8 | 0 | -3.596557  | -1.699052 | -0.370799 |
| 45 | 6 | 0 | -4.777402  | 0.157560  | 0.662649  |
| 46 | 7 | 0 | -6.034727  | -0.374449 | 0.114926  |
| 47 | 1 | 0 | -6.158311  | -1.390487 | 0.094750  |
| 48 | 6 | 0 | -7.050118  | 0.422509  | -0.273026 |
| 49 | 8 | 0 | -7.019692  | 1.664239  | -0.219539 |
| 50 | 6 | 0 | -0.097859  | 0.475390  | -0.177887 |
| 51 | 8 | 0 | -0.123580  | 1.652497  | 0.218671  |
| 52 | 1 | 0 | -1.278144  | -1.216458 | -0.890044 |
| 53 | 1 | 0 | -4.777902  | 1.239428  | 0.498328  |
| 54 | 6 | 0 | 4.884217   | -4.408423 | -1.538957 |
| 55 | 6 | 0 | 3.774206   | -5.195132 | -0.801529 |
| 56 | 8 | 0 | 3.896013   | -6.399593 | -0.561343 |
| 57 | 7 | 0 | 6.182268   | -4.952695 | -1.118351 |
| 58 | 1 | 0 | 6.246507   | -5.962428 | -1.053762 |
| 59 | 6 | 0 | 7.217915   | -4.177655 | -0.727017 |
| 60 | 8 | 0 | 7.178020   | -2.937267 | -0.746886 |
| 61 | 6 | 0 | 8.466225   | -4.933478 | -0.213658 |
| 62 | 7 | 0 | 9.675479   | -4.319771 | -0.758662 |
| 63 | 1 | 0 | 9.886269   | -3.349737 | -0.522498 |
| 64 | 6 | 0 | 10.444190  | -4.980980 | -1.678440 |
| 65 | 8 | 0 | 10.204259  | -6.128971 | -2.062590 |
| 66 | 1 | 0 | 4.859831   | -3.353116 | -1.250832 |
| 67 | 1 | 0 | 8.464082   | -5.965774 | -0.586332 |
| 68 | 6 | 0 | 11.639508  | -4.191063 | -2.195561 |
| 69 | 1 | 0 | 11.691773  | -3.180048 | -1.782700 |
| 70 | 1 | 0 | 12.552525  | -4.741370 | -1.944310 |
| 71 | 1 | 0 | 11.575922  | -4.143549 | -3.287516 |
| 72 | 6 | 0 | 12.579592  | 0.303355  | -0.510098 |
| 73 | 1 | 0 | 13.018191  | -0.634586 | -0.154948 |
| 74 | 1 | 0 | 12.453692  | 0.226308  | -1.597598 |
| 75 | 1 | 0 | 13.256532  | 1.131464  | -0.286308 |
| 76 | 6 | 0 | -9.186616  | -4.458946 | 0.703987  |
| 77 | 1 | 0 | -9.089589  | -3.380871 | 0.544782  |
| 78 | 6 | 0 | -8.283213  | -0.316562 | -0.851594 |
| 79 | 1 | 0 | -8.325920  | -1.334732 | -0.452247 |
| 80 | 1 | 0 | -9.642098  | 1.343129  | -0.702899 |
| 81 | 6 | 0 | -10.461050 | -0.230096 | 0.329385  |
| 82 | 6 | 0 | -11.649785 | 0.641458  | 0.702355  |
| 83 | 1 | 0 | -11.587521 | 1.646469  | 0.278766  |
| 84 | 1 | 0 | -12.563773 | 0.148065  | 0.355557  |

|     |   |   |            |           |           |
|-----|---|---|------------|-----------|-----------|
| 85  | 1 | 0 | -11.703447 | 0.704446  | 1.794434  |
| 86  | 8 | 0 | -10.388329 | -1.411191 | 0.711362  |
| 87  | 7 | 0 | -9.510413  | 0.369431  | -0.428049 |
| 88  | 6 | 0 | -9.990306  | -4.745586 | 1.997271  |
| 89  | 1 | 0 | -10.902785 | -2.933826 | 1.755896  |
| 90  | 6 | 0 | -11.792746 | -3.911752 | 3.448836  |
| 91  | 1 | 0 | -12.834545 | -3.726186 | 3.161883  |
| 92  | 1 | 0 | -11.704663 | -4.921474 | 3.855080  |
| 93  | 1 | 0 | -11.510700 | -3.193530 | 4.229993  |
| 94  | 8 | 0 | -9.779587  | -5.772500 | 2.652136  |
| 95  | 7 | 0 | -10.919202 | -3.804370 | 2.290479  |
| 96  | 6 | 0 | -9.931432  | -5.056792 | -0.464113 |
| 97  | 1 | 0 | -9.368101  | -4.896712 | -1.415543 |
| 98  | 1 | 0 | -10.092448 | -6.154034 | -0.328001 |
| 99  | 1 | 0 | -10.927476 | -4.557353 | -0.552939 |
| 100 | 6 | 0 | -8.114648  | -0.392543 | -2.350238 |
| 101 | 1 | 0 | -8.048129  | 0.626340  | -2.805269 |
| 102 | 1 | 0 | -7.175715  | -0.951750 | -2.585483 |
| 103 | 1 | 0 | -8.974414  | -0.932688 | -2.816385 |
| 104 | 6 | 0 | -4.600404  | -0.105784 | 2.139857  |
| 105 | 1 | 0 | -4.584347  | -1.202018 | 2.358986  |
| 106 | 1 | 0 | -3.633873  | 0.341120  | 2.479422  |
| 107 | 1 | 0 | -5.430602  | 0.360041  | 2.724664  |
| 108 | 6 | 0 | -5.240675  | -4.699295 | 2.630300  |
| 109 | 1 | 0 | -4.304678  | -5.179795 | 3.008701  |
| 110 | 1 | 0 | -5.185314  | -3.602810 | 2.839370  |
| 111 | 1 | 0 | -6.107874  | -5.126389 | 3.190808  |
| 112 | 6 | 0 | -2.597599  | -4.849242 | -2.300806 |
| 113 | 1 | 0 | -1.860022  | -4.412238 | -3.017490 |
| 114 | 1 | 0 | -2.678098  | -5.945500 | -2.500290 |
| 115 | 1 | 0 | -3.593609  | -4.376607 | -2.485715 |
| 116 | 6 | 0 | -1.161773  | 0.281418  | -2.398034 |
| 117 | 1 | 0 | -1.165112  | 1.393365  | -2.511999 |
| 118 | 1 | 0 | -0.198805  | -0.116894 | -2.802184 |
| 119 | 1 | 0 | -2.001058  | -0.140178 | -3.003098 |
| 120 | 6 | 0 | 1.492143   | -4.945012 | 1.649186  |
| 121 | 1 | 0 | 2.378918   | -5.475031 | 2.075900  |
| 122 | 1 | 0 | 1.518099   | -3.880519 | 1.988994  |
| 123 | 1 | 0 | 0.565976   | -5.425400 | 2.049116  |
| 124 | 6 | 0 | 2.320828   | -0.424234 | 2.068736  |
| 125 | 1 | 0 | 2.322280   | -1.541421 | 2.110865  |
| 126 | 1 | 0 | 3.278398   | -0.048763 | 2.505972  |
| 127 | 1 | 0 | 1.474397   | -0.046780 | 2.692659  |

|     |   |   |           |           |           |
|-----|---|---|-----------|-----------|-----------|
| 128 | 6 | 0 | 4.627399  | -4.511128 | -3.023220 |
| 129 | 1 | 0 | 4.609874  | -5.575658 | -3.362257 |
| 130 | 1 | 0 | 3.638516  | -4.044945 | -3.255685 |
| 131 | 1 | 0 | 5.418527  | -3.969733 | -3.597198 |
| 132 | 6 | 0 | 5.924667  | 0.558665  | -2.243054 |
| 133 | 1 | 0 | 5.929205  | 1.675907  | -2.230251 |
| 134 | 1 | 0 | 6.902281  | 0.201508  | -2.650578 |
| 135 | 1 | 0 | 5.109450  | 0.213496  | -2.924581 |
| 136 | 6 | 0 | 8.406019  | -4.951110 | 1.295010  |
| 137 | 1 | 0 | 8.419608  | -3.914336 | 1.713180  |
| 138 | 1 | 0 | 7.464263  | -5.455666 | 1.622213  |
| 139 | 1 | 0 | 9.275447  | -5.513135 | 1.715196  |
| 140 | 6 | 0 | 9.130721  | -0.695033 | 2.367525  |
| 141 | 1 | 0 | 8.232639  | -0.433262 | 2.977962  |
| 142 | 1 | 0 | 9.169147  | -1.806182 | 2.247397  |
| 143 | 1 | 0 | 10.044832 | -0.366598 | 2.920107  |
| 144 | 6 | 0 | -1.990901 | 5.088753  | -0.531694 |
| 145 | 6 | 0 | -3.271961 | 4.364497  | -0.058726 |
| 146 | 8 | 0 | -3.272675 | 3.150147  | 0.182288  |
| 147 | 7 | 0 | -4.371935 | 5.147039  | 0.039666  |
| 148 | 1 | 0 | -4.332528 | 6.118573  | -0.249375 |
| 149 | 6 | 0 | -5.714316 | 4.611916  | 0.309351  |
| 150 | 6 | 0 | -6.664880 | 5.152526  | -0.786066 |
| 151 | 8 | 0 | -6.538981 | 6.298895  | -1.228842 |
| 152 | 7 | 0 | -7.631095 | 4.274320  | -1.160622 |
| 153 | 1 | 0 | -7.575169 | 3.302616  | -0.837567 |
| 154 | 7 | 0 | -0.841129 | 4.468065  | 0.128355  |
| 155 | 1 | 0 | -0.800999 | 3.446424  | 0.173186  |
| 156 | 6 | 0 | 0.233809  | 5.193458  | 0.524755  |
| 157 | 8 | 0 | 0.362799  | 6.412237  | 0.368682  |
| 158 | 6 | 0 | 1.314249  | 4.364969  | 1.261334  |
| 159 | 7 | 0 | 2.607215  | 5.021635  | 1.029327  |
| 160 | 1 | 0 | 2.573154  | 6.033973  | 0.956883  |
| 161 | 1 | 0 | -2.004720 | 6.142146  | -0.224676 |
| 162 | 1 | 0 | -5.652431 | 3.520798  | 0.257704  |
| 163 | 1 | 0 | 1.364210  | 3.354842  | 0.844163  |
| 164 | 6 | 0 | 4.939254  | 5.235786  | 0.330886  |
| 165 | 6 | 0 | 3.733002  | 4.346017  | 0.707028  |
| 166 | 8 | 0 | 3.806959  | 3.110403  | 0.683831  |
| 167 | 7 | 0 | 6.169361  | 4.500714  | 0.634326  |
| 168 | 1 | 0 | 6.160916  | 3.478797  | 0.566434  |
| 169 | 6 | 0 | 7.331520  | 5.149310  | 0.881900  |
| 170 | 8 | 0 | 7.459389  | 6.380036  | 0.879931  |

|     |   |   |            |          |           |
|-----|---|---|------------|----------|-----------|
| 171 | 6 | 0 | 8.533343   | 4.224652 | 1.199281  |
| 172 | 7 | 0 | 9.737932   | 5.050890 | 1.086335  |
| 173 | 1 | 0 | 9.565620   | 6.052214 | 1.094347  |
| 174 | 6 | 0 | 10.974514  | 4.532259 | 0.924885  |
| 175 | 8 | 0 | 11.192238  | 3.309743 | 0.883697  |
| 176 | 1 | 0 | 4.939792   | 6.146816 | 0.944187  |
| 177 | 1 | 0 | 8.578309   | 3.424828 | 0.451160  |
| 178 | 6 | 0 | 12.109651  | 5.534224 | 0.784378  |
| 179 | 1 | 0 | 11.777568  | 6.575066 | 0.842729  |
| 180 | 1 | 0 | 12.843567  | 5.345273 | 1.574297  |
| 181 | 1 | 0 | 12.607555  | 5.368128 | -0.176349 |
| 182 | 6 | 0 | -8.630839  | 4.622557 | -2.173856 |
| 183 | 1 | 0 | -8.521645  | 5.700067 | -2.349033 |
| 184 | 6 | 0 | -10.034065 | 4.283237 | -1.622215 |
| 185 | 1 | 0 | -10.622595 | 6.194902 | -2.012463 |
| 186 | 6 | 0 | -12.323287 | 5.158668 | -1.244160 |
| 187 | 1 | 0 | -13.006357 | 5.587624 | -1.985000 |
| 188 | 1 | 0 | -12.542470 | 4.096150 | -1.124640 |
| 189 | 1 | 0 | -12.478443 | 5.660978 | -0.281151 |
| 190 | 8 | 0 | -10.299783 | 3.162961 | -1.170496 |
| 191 | 7 | 0 | -10.943785 | 5.289753 | -1.696505 |
| 192 | 6 | 0 | -8.464471  | 3.899206 | -3.489236 |
| 193 | 1 | 0 | -7.466949  | 4.124632 | -3.938995 |
| 194 | 1 | 0 | -8.552483  | 2.792474 | -3.354802 |
| 195 | 1 | 0 | -9.258869  | 4.234314 | -4.199856 |
| 196 | 6 | 0 | -6.271700  | 5.004238 | 1.655641  |
| 197 | 1 | 0 | -5.601936  | 4.650794 | 2.477161  |
| 198 | 1 | 0 | -6.386827  | 6.112088 | 1.743892  |
| 199 | 1 | 0 | -7.274536  | 4.527955 | 1.786265  |
| 200 | 6 | 0 | -1.956296  | 5.038030 | -2.042159 |
| 201 | 1 | 0 | -1.051609  | 5.569500 | -2.427304 |
| 202 | 1 | 0 | -1.932607  | 3.984226 | -2.413954 |
| 203 | 1 | 0 | -2.864743  | 5.541925 | -2.453708 |
| 204 | 6 | 0 | 0.926042   | 4.260644 | 2.716464  |
| 205 | 1 | 0 | 1.704622   | 3.702012 | 3.291244  |
| 206 | 1 | 0 | 0.799191   | 5.268856 | 3.180497  |
| 207 | 1 | 0 | -0.040106  | 3.703824 | 2.796130  |
| 208 | 6 | 0 | 4.793275   | 5.655229 | -1.114288 |
| 209 | 1 | 0 | 4.753032   | 4.771154 | -1.795722 |
| 210 | 1 | 0 | 3.854046   | 6.247045 | -1.240983 |
| 211 | 1 | 0 | 5.658509   | 6.296722 | -1.415512 |
| 212 | 6 | 0 | 8.338091   | 3.577481 | 2.548627  |
| 213 | 1 | 0 | 8.123670   | 4.332541 | 3.342292  |

|     |   |   |          |          |          |
|-----|---|---|----------|----------|----------|
| 214 | 1 | 0 | 7.483883 | 2.856544 | 2.488219 |
| 215 | 1 | 0 | 9.256522 | 3.007903 | 2.837803 |
| 216 | 1 | 0 | 2.207264 | 1.166329 | 0.660002 |

AP PI (Ac-AAAAAA-NHMe)<sub>4</sub>

|    |   |   |           |           |           |
|----|---|---|-----------|-----------|-----------|
| 1  | 6 | 0 | 5.630093  | -2.367614 | -1.360775 |
| 2  | 7 | 0 | 4.395376  | -1.985050 | -0.657464 |
| 3  | 1 | 0 | 4.284289  | -1.008033 | -0.373315 |
| 4  | 6 | 0 | 3.372102  | -2.846116 | -0.468563 |
| 5  | 8 | 0 | 3.356928  | -4.017368 | -0.877608 |
| 6  | 6 | 0 | 2.201904  | -2.282965 | 0.372401  |
| 7  | 7 | 0 | 0.929315  | -2.747686 | -0.200459 |
| 8  | 1 | 0 | 0.817973  | -3.749473 | -0.378842 |
| 9  | 6 | 0 | 6.837017  | -1.840307 | -0.550394 |
| 10 | 8 | 0 | 6.836449  | -0.684342 | -0.090809 |
| 11 | 7 | 0 | 7.864594  | -2.703218 | -0.423310 |
| 12 | 1 | 0 | 7.755103  | -3.667369 | -0.757972 |
| 13 | 6 | 0 | 9.102337  | -2.345094 | 0.289394  |
| 14 | 6 | 0 | 10.316258 | -2.710588 | -0.596701 |
| 15 | 8 | 0 | 10.449300 | -3.850259 | -1.069580 |
| 16 | 7 | 0 | 11.206979 | -1.713580 | -0.778256 |
| 17 | 1 | 0 | 10.997245 | -0.783344 | -0.409606 |
| 18 | 1 | 0 | 5.657502  | -3.460251 | -1.413102 |
| 19 | 1 | 0 | 9.071196  | -1.264845 | 0.462169  |
| 20 | 6 | 0 | -2.212534 | -6.991566 | -0.526794 |
| 21 | 6 | 0 | -3.157691 | -7.596258 | 0.539557  |
| 22 | 8 | 0 | -2.935932 | -8.708913 | 1.028819  |
| 23 | 7 | 0 | -4.232400 | -6.821885 | 0.827289  |
| 24 | 1 | 0 | -4.257611 | -5.853382 | 0.498593  |
| 25 | 6 | 0 | -5.263885 | -7.253283 | 1.772684  |
| 26 | 6 | 0 | -6.601945 | -6.599888 | 1.356918  |
| 27 | 8 | 0 | -6.629247 | -5.504014 | 0.778631  |
| 28 | 7 | 0 | -7.709057 | -7.295000 | 1.692869  |
| 29 | 1 | 0 | -7.636644 | -8.137349 | 2.256170  |
| 30 | 7 | 0 | -0.863302 | -7.512021 | -0.266330 |
| 31 | 1 | 0 | -0.822974 | -8.466059 | 0.078543  |
| 32 | 6 | 0 | 0.240968  | -6.735075 | -0.272286 |
| 33 | 8 | 0 | 0.230293  | -5.536710 | -0.590590 |
| 34 | 6 | 0 | 1.544828  | -7.430617 | 0.180505  |
| 35 | 7 | 0 | 2.657206  | -6.853331 | -0.576772 |
| 36 | 1 | 0 | 2.677789  | -5.838980 | -0.704965 |
| 37 | 1 | 0 | -2.181442 | -5.902041 | -0.430781 |
| 38 | 1 | 0 | -5.334803 | -8.346345 | 1.702434  |
| 39 | 1 | 0 | 1.515897  | -8.501261 | -0.058388 |
| 40 | 6 | 0 | -1.366090 | -2.573891 | -1.028903 |
| 41 | 7 | 0 | -2.563050 | -2.061506 | -0.344938 |



|    |   |   |            |           |           |
|----|---|---|------------|-----------|-----------|
| 42 | 1 | 0 | -2.664799  | -1.047511 | -0.246971 |
| 43 | 6 | 0 | -3.560541  | -2.868252 | 0.079153  |
| 44 | 8 | 0 | -3.583683  | -4.098022 | -0.086394 |
| 45 | 6 | 0 | -4.679869  | -2.147063 | 0.867733  |
| 46 | 7 | 0 | -5.988107  | -2.696698 | 0.480065  |
| 47 | 1 | 0 | -6.123061  | -3.708957 | 0.544806  |
| 48 | 6 | 0 | -7.033673  | -1.905566 | 0.161426  |
| 49 | 8 | 0 | -6.982528  | -0.664013 | 0.135563  |
| 50 | 6 | 0 | -0.117192  | -1.918922 | -0.391792 |
| 51 | 8 | 0 | -0.103947  | -0.706029 | -0.120455 |
| 52 | 1 | 0 | -1.340395  | -3.658397 | -0.883367 |
| 53 | 1 | 0 | -4.686813  | -1.081024 | 0.621544  |
| 54 | 6 | 0 | 4.763491   | -6.821561 | -1.803739 |
| 55 | 6 | 0 | 3.735527   | -7.593929 | -0.942411 |
| 56 | 8 | 0 | 3.894898   | -8.788075 | -0.673332 |
| 57 | 7 | 0 | 6.101165   | -7.343474 | -1.493342 |
| 58 | 1 | 0 | 6.179555   | -8.349750 | -1.396878 |
| 59 | 6 | 0 | 7.163896   | -6.549065 | -1.237206 |
| 60 | 8 | 0 | 7.112622   | -5.310673 | -1.301130 |
| 61 | 6 | 0 | 8.461643   | -7.280527 | -0.819121 |
| 62 | 7 | 0 | 9.614319   | -6.655629 | -1.464385 |
| 63 | 1 | 0 | 9.820983   | -5.675882 | -1.267190 |
| 64 | 6 | 0 | 10.328605  | -7.323338 | -2.422470 |
| 65 | 8 | 0 | 10.088998  | -8.486032 | -2.759824 |
| 66 | 1 | 0 | 4.755288   | -5.758296 | -1.545576 |
| 67 | 1 | 0 | 8.445172   | -8.316405 | -1.181695 |
| 68 | 6 | 0 | 11.462718  | -6.520871 | -3.047181 |
| 69 | 1 | 0 | 11.520332  | -5.498131 | -2.665275 |
| 70 | 1 | 0 | 12.405058  | -7.043691 | -2.851535 |
| 71 | 1 | 0 | 11.316595  | -6.504483 | -4.132098 |
| 72 | 6 | 0 | 12.421653  | -1.900167 | -1.558102 |
| 73 | 1 | 0 | 12.789035  | -2.921446 | -1.427547 |
| 74 | 1 | 0 | 12.245644  | -1.735854 | -2.629648 |
| 75 | 1 | 0 | 13.181460  | -1.192399 | -1.213425 |
| 76 | 6 | 0 | -9.068996  | -6.751007 | 1.563338  |
| 77 | 1 | 0 | -8.987708  | -5.677332 | 1.369110  |
| 78 | 6 | 0 | -8.333198  | -2.654846 | -0.225775 |
| 79 | 1 | 0 | -8.323513  | -3.662754 | 0.201315  |
| 80 | 1 | 0 | -9.645868  | -0.975891 | 0.077861  |
| 81 | 6 | 0 | -10.359679 | -2.543308 | 1.195588  |
| 82 | 6 | 0 | -11.487794 | -1.659374 | 1.702572  |
| 83 | 1 | 0 | -11.469589 | -0.658942 | 1.264670  |
| 84 | 1 | 0 | -12.440243 | -2.149156 | 1.474270  |

|     |   |   |            |           |           |
|-----|---|---|------------|-----------|-----------|
| 85  | 1 | 0 | -11.407225 | -1.587820 | 2.792727  |
| 86  | 8 | 0 | -10.260829 | -3.728892 | 1.562575  |
| 87  | 7 | 0 | -9.489823  | -1.951272 | 0.343192  |
| 88  | 6 | 0 | -9.793537  | -7.005025 | 2.908944  |
| 89  | 1 | 0 | -10.724194 | -5.201967 | 2.673966  |
| 90  | 6 | 0 | -11.512461 | -6.139348 | 4.439768  |
| 91  | 1 | 0 | -12.568516 | -5.954213 | 4.210426  |
| 92  | 1 | 0 | -11.404703 | -7.140771 | 4.861677  |
| 93  | 1 | 0 | -11.182759 | -5.406445 | 5.188103  |
| 94  | 8 | 0 | -9.539155  | -8.013113 | 3.578303  |
| 95  | 7 | 0 | -10.708720 | -6.060064 | 3.230054  |
| 96  | 6 | 0 | -9.879312  | -7.382806 | 0.458160  |
| 97  | 1 | 0 | -9.373149  | -7.248429 | -0.528720 |
| 98  | 1 | 0 | -10.028616 | -8.475983 | 0.634054  |
| 99  | 1 | 0 | -10.880268 | -6.887252 | 0.413964  |
| 100 | 6 | 0 | -8.368350  | -2.766732 | -1.731492 |
| 101 | 1 | 0 | -8.369844  | -1.758345 | -2.214215 |
| 102 | 1 | 0 | -7.466553  | -3.328324 | -2.078858 |
| 103 | 1 | 0 | -9.280293  | -3.319783 | -2.063988 |
| 104 | 6 | 0 | -4.369294  | -2.302250 | 2.338743  |
| 105 | 1 | 0 | -4.342745  | -3.379348 | 2.637285  |
| 106 | 1 | 0 | -3.371618  | -1.846824 | 2.553674  |
| 107 | 1 | 0 | -5.137825  | -1.781019 | 2.959842  |
| 108 | 6 | 0 | -4.988908  | -6.895734 | 3.215737  |
| 109 | 1 | 0 | -4.028994  | -7.360592 | 3.551058  |
| 110 | 1 | 0 | -4.914380  | -5.789327 | 3.354952  |
| 111 | 1 | 0 | -5.813593  | -7.282413 | 3.863003  |
| 112 | 6 | 0 | -2.751442  | -7.335962 | -1.894164 |
| 113 | 1 | 0 | -2.074374  | -6.945271 | -2.692629 |
| 114 | 1 | 0 | -2.855995  | -8.440147 | -2.027687 |
| 115 | 1 | 0 | -3.756269  | -6.862273 | -2.019384 |
| 116 | 6 | 0 | -1.333568  | -2.287563 | -2.511541 |
| 117 | 1 | 0 | -1.346828  | -1.188196 | -2.713820 |
| 118 | 1 | 0 | -0.400340  | -2.720326 | -2.948599 |
| 119 | 1 | 0 | -2.212547  | -2.752948 | -3.020426 |
| 120 | 6 | 0 | 1.656867   | -7.287790 | 1.681305  |
| 121 | 1 | 0 | 2.580499   | -7.797895 | 2.050175  |
| 122 | 1 | 0 | 1.699753   | -6.213363 | 1.986358  |
| 123 | 1 | 0 | 0.770900   | -7.762786 | 2.169119  |
| 124 | 6 | 0 | 2.419448   | -2.716022 | 1.803869  |
| 125 | 1 | 0 | 2.435300   | -3.830297 | 1.893890  |
| 126 | 1 | 0 | 3.398079   | -2.314359 | 2.164314  |
| 127 | 1 | 0 | 1.609137   | -2.318307 | 2.462087  |

|     |   |   |           |           |           |
|-----|---|---|-----------|-----------|-----------|
| 128 | 6 | 0 | 4.367918  | -6.970223 | -3.253339 |
| 129 | 1 | 0 | 4.326619  | -8.044452 | -3.557831 |
| 130 | 1 | 0 | 3.357952  | -6.515882 | -3.404467 |
| 131 | 1 | 0 | 5.096797  | -6.442219 | -3.915461 |
| 132 | 6 | 0 | 5.736931  | -1.814359 | -2.762183 |
| 133 | 1 | 0 | 5.727789  | -0.696507 | -2.759890 |
| 134 | 1 | 0 | 6.694131  | -2.162973 | -3.222039 |
| 135 | 1 | 0 | 4.888418  | -2.175989 | -3.392528 |
| 136 | 6 | 0 | 8.521414  | -7.287008 | 0.689753  |
| 137 | 1 | 0 | 8.549448  | -6.247124 | 1.099093  |
| 138 | 1 | 0 | 7.617766  | -7.805379 | 1.093918  |
| 139 | 1 | 0 | 9.431306  | -7.830503 | 1.043387  |
| 140 | 6 | 0 | 9.266945  | -3.050803 | 1.614182  |
| 141 | 1 | 0 | 8.414550  | -2.816315 | 2.296809  |
| 142 | 1 | 0 | 9.320033  | -4.159309 | 1.476764  |
| 143 | 1 | 0 | 10.214327 | -2.707687 | 2.097369  |
| 144 | 6 | 0 | 5.711240  | 7.029419  | 0.283758  |
| 145 | 7 | 0 | 4.352144  | 7.561313  | 0.460039  |
| 146 | 1 | 0 | 4.291273  | 8.506211  | 0.824470  |
| 147 | 6 | 0 | 3.243091  | 6.790362  | 0.377569  |
| 148 | 8 | 0 | 3.261634  | 5.601308  | 0.034051  |
| 149 | 6 | 0 | 1.924671  | 7.491431  | 0.778631  |
| 150 | 7 | 0 | 0.835342  | 6.906846  | -0.005386 |
| 151 | 1 | 0 | 0.821427  | 5.891496  | -0.134674 |
| 152 | 6 | 0 | 6.556589  | 7.486366  | 1.496979  |
| 153 | 8 | 0 | 6.385756  | 8.597540  | 2.009554  |
| 154 | 7 | 0 | 7.489549  | 6.581323  | 1.889652  |
| 155 | 1 | 0 | 7.467124  | 5.635479  | 1.493002  |
| 156 | 6 | 0 | 8.400165  | 6.853026  | 3.004990  |
| 157 | 6 | 0 | 9.844391  | 6.544843  | 2.548396  |
| 158 | 8 | 0 | 10.146568 | 5.458312  | 2.041500  |
| 159 | 7 | 0 | 10.746162 | 7.536931  | 2.770456  |
| 160 | 1 | 0 | 10.400401 | 8.423194  | 3.112670  |
| 161 | 1 | 0 | 5.640446  | 5.937982  | 0.257967  |
| 162 | 1 | 0 | 1.964206  | 8.559150  | 0.527751  |
| 163 | 1 | 0 | 8.276492  | 7.916121  | 3.246166  |
| 164 | 6 | 0 | -2.074520 | 2.505300  | -1.176262 |
| 165 | 6 | 0 | -3.300544 | 1.909714  | -0.445035 |
| 166 | 8 | 0 | -3.310199 | 0.721484  | -0.087455 |
| 167 | 7 | 0 | -4.333350 | 2.760813  | -0.271365 |
| 168 | 1 | 0 | -4.232287 | 3.741797  | -0.539894 |
| 169 | 6 | 0 | -5.601619 | 2.336808  | 0.344385  |
| 170 | 6 | 0 | -6.760510 | 2.837806  | -0.546165 |

|     |   |   |           |          |           |
|-----|---|---|-----------|----------|-----------|
| 171 | 8 | 0 | -6.776614 | 4.008000 | -0.963052 |
| 172 | 7 | 0 | -7.728126 | 1.930471 | -0.795416 |
| 173 | 1 | 0 | -7.608379 | 0.965827 | -0.467119 |
| 174 | 7 | 0 | -0.856050 | 2.045037 | -0.494323 |
| 175 | 1 | 0 | -0.741132 | 1.038024 | -0.339686 |
| 176 | 6 | 0 | 0.141859  | 2.884530 | -0.149297 |
| 177 | 8 | 0 | 0.148300  | 4.102719 | -0.393619 |
| 178 | 6 | 0 | 1.291092  | 2.229339 | 0.649462  |
| 179 | 7 | 0 | 2.576600  | 2.751752 | 0.160552  |
| 180 | 1 | 0 | 2.689827  | 3.764640 | 0.084124  |
| 181 | 1 | 0 | -2.092350 | 3.597964 | -1.119070 |
| 182 | 1 | 0 | -5.597183 | 1.243379 | 0.385691  |
| 183 | 1 | 0 | 1.294612  | 1.146889 | 0.488033  |
| 184 | 6 | 0 | -1.236582 | 6.861066 | -1.288459 |
| 185 | 7 | 0 | -2.554626 | 7.484226 | -1.108660 |
| 186 | 1 | 0 | -2.543527 | 8.489298 | -0.963163 |
| 187 | 6 | 0 | -3.688044 | 6.773936 | -0.917091 |
| 188 | 8 | 0 | -3.740838 | 5.538343 | -0.980130 |
| 189 | 6 | 0 | -4.937974 | 7.618397 | -0.578447 |
| 190 | 7 | 0 | -6.127984 | 6.867524 | -0.985596 |
| 191 | 1 | 0 | -6.100498 | 5.844760 | -0.945024 |
| 192 | 6 | 0 | -7.283793 | 7.496598 | -1.302970 |
| 193 | 8 | 0 | -7.440677 | 8.723705 | -1.284782 |
| 194 | 6 | 0 | -0.227396 | 7.643527 | -0.413076 |
| 195 | 8 | 0 | -0.394640 | 8.842757 | -0.166767 |
| 196 | 1 | 0 | -1.300313 | 5.822246 | -0.951596 |
| 197 | 1 | 0 | -4.925990 | 8.553547 | -1.154026 |
| 198 | 6 | 0 | 4.896167  | 2.650761 | -0.618311 |
| 199 | 6 | 0 | 3.630176  | 1.941512 | -0.079720 |
| 200 | 8 | 0 | 3.608552  | 0.710634 | 0.074579  |
| 201 | 7 | 0 | 6.079131  | 2.063333 | 0.028849  |
| 202 | 1 | 0 | 6.210877  | 1.047418 | -0.032178 |
| 203 | 6 | 0 | 7.015576  | 2.810918 | 0.643979  |
| 204 | 8 | 0 | 6.987904  | 4.053390 | 0.704753  |
| 205 | 6 | 0 | 8.139750  | 2.006680 | 1.339559  |
| 206 | 7 | 0 | 9.426414  | 2.682790 | 1.130122  |
| 207 | 1 | 0 | 9.517913  | 3.656875 | 1.418918  |
| 208 | 6 | 0 | 10.506926 | 2.044780 | 0.617895  |
| 209 | 8 | 0 | 10.499892 | 0.846808 | 0.287730  |
| 210 | 1 | 0 | 4.872363  | 3.713847 | -0.359571 |
| 211 | 1 | 0 | 8.218885  | 1.012228 | 0.889624  |
| 212 | 6 | 0 | 11.755140 | 2.896646 | 0.449760  |
| 213 | 1 | 0 | 11.626183 | 3.914906 | 0.823902  |

|     |   |   |            |          |           |
|-----|---|---|------------|----------|-----------|
| 214 | 1 | 0 | 12.581826  | 2.408914 | 0.976609  |
| 215 | 1 | 0 | 12.013298  | 2.925053 | -0.614330 |
| 216 | 6 | 0 | 12.156762  | 7.427009 | 2.419192  |
| 217 | 1 | 0 | 12.407545  | 6.368135 | 2.332154  |
| 218 | 1 | 0 | 12.373144  | 7.917910 | 1.461925  |
| 219 | 1 | 0 | 12.773016  | 7.881598 | 3.201607  |
| 220 | 6 | 0 | -8.909456  | 2.252339 | -1.611322 |
| 221 | 1 | 0 | -8.867084  | 3.327727 | -1.818102 |
| 222 | 6 | 0 | -8.438380  | 6.553046 | -1.724877 |
| 223 | 1 | 0 | -8.519423  | 5.736709 | -0.998139 |
| 224 | 1 | 0 | -9.516281  | 8.356058 | -1.666998 |
| 225 | 6 | 0 | -10.898620 | 6.804827 | -1.605604 |
| 226 | 6 | 0 | -12.062667 | 7.780325 | -1.531956 |
| 227 | 1 | 0 | -11.751074 | 8.828631 | -1.561805 |
| 228 | 1 | 0 | -12.739263 | 7.581548 | -2.369170 |
| 229 | 1 | 0 | -12.617908 | 7.595694 | -0.606703 |
| 230 | 8 | 0 | -11.092422 | 5.577086 | -1.587315 |
| 231 | 7 | 0 | -9.666437  | 7.351184 | -1.683554 |
| 232 | 6 | 0 | -10.188576 | 1.897540 | -0.817608 |
| 233 | 1 | 0 | -10.956945 | 3.784668 | -1.162611 |
| 234 | 6 | 0 | -12.407540 | 2.639702 | -0.102852 |
| 235 | 1 | 0 | -13.066929 | 3.478044 | -0.339496 |
| 236 | 1 | 0 | -12.868372 | 1.705506 | -0.440207 |
| 237 | 1 | 0 | -12.278549 | 2.579734 | 0.985257  |
| 238 | 8 | 0 | -10.322521 | 0.782304 | -0.285591 |
| 239 | 7 | 0 | -11.134846 | 2.854024 | -0.778934 |
| 240 | 6 | 0 | -8.960547  | 1.507033 | -2.923841 |
| 241 | 1 | 0 | -8.062758  | 1.739082 | -3.546652 |
| 242 | 1 | 0 | -9.002851  | 0.401804 | -2.758295 |
| 243 | 1 | 0 | -9.874566  | 1.816544 | -3.487378 |
| 244 | 6 | 0 | -8.132731  | 5.939127 | -3.069218 |
| 245 | 1 | 0 | -7.882712  | 6.715486 | -3.831302 |
| 246 | 1 | 0 | -7.266746  | 5.237907 | -2.962798 |
| 247 | 1 | 0 | -9.013639  | 5.353494 | -3.433129 |
| 248 | 6 | 0 | -4.891516  | 7.980023 | 0.888784  |
| 249 | 1 | 0 | -4.867827  | 7.069129 | 1.534824  |
| 250 | 1 | 0 | -3.978995  | 8.589992 | 1.097896  |
| 251 | 1 | 0 | -5.790943  | 8.585733 | 1.162538  |
| 252 | 6 | 0 | -5.818642  | 2.877591 | 1.737361  |
| 253 | 1 | 0 | -5.001067  | 2.542681 | 2.421017  |
| 254 | 1 | 0 | -5.849458  | 3.994671 | 1.739385  |
| 255 | 1 | 0 | -6.790910  | 2.492556 | 2.131912  |
| 256 | 6 | 0 | -2.158310  | 2.096809 | -2.627861 |

|     |   |   |           |           |           |
|-----|---|---|-----------|-----------|-----------|
| 257 | 1 | 0 | -1.296688 | 2.513684  | -3.203945 |
| 258 | 1 | 0 | -2.153526 | 0.984106  | -2.737405 |
| 259 | 1 | 0 | -3.105509 | 2.494998  | -3.067509 |
| 260 | 6 | 0 | -0.739297 | 6.869545  | -2.713808 |
| 261 | 1 | 0 | -0.590083 | 7.910608  | -3.090313 |
| 262 | 1 | 0 | 0.236604  | 6.326086  | -2.761390 |
| 263 | 1 | 0 | -1.465577 | 6.350828  | -3.386178 |
| 264 | 6 | 0 | 1.039004  | 2.498721  | 2.114947  |
| 265 | 1 | 0 | 1.836665  | 2.031993  | 2.742615  |
| 266 | 1 | 0 | 1.014479  | 3.595605  | 2.328444  |
| 267 | 1 | 0 | 0.054946  | 2.055793  | 2.405704  |
| 268 | 6 | 0 | 1.763602  | 7.367137  | 2.276692  |
| 269 | 1 | 0 | 1.717164  | 6.296669  | 2.594326  |
| 270 | 1 | 0 | 2.629283  | 7.854511  | 2.788145  |
| 271 | 1 | 0 | 0.824964  | 7.875648  | 2.608189  |
| 272 | 6 | 0 | 4.895327  | 2.517951  | -2.122602 |
| 273 | 1 | 0 | 4.911721  | 1.444686  | -2.435719 |
| 274 | 1 | 0 | 3.972066  | 2.995884  | -2.532828 |
| 275 | 1 | 0 | 5.785593  | 3.029161  | -2.563276 |
| 276 | 6 | 0 | 6.396590  | 7.500621  | -0.975438 |
| 277 | 1 | 0 | 6.528267  | 8.610087  | -0.979296 |
| 278 | 1 | 0 | 7.403389  | 7.019448  | -1.042668 |
| 279 | 1 | 0 | 5.804684  | 7.210749  | -1.877688 |
| 280 | 6 | 0 | 7.758255  | 1.850891  | 2.793103  |
| 281 | 1 | 0 | 7.647853  | 2.844097  | 3.293996  |
| 282 | 1 | 0 | 6.784648  | 1.305978  | 2.860089  |
| 283 | 1 | 0 | 8.532286  | 1.261263  | 3.341951  |
| 284 | 6 | 0 | 8.124672  | 6.039843  | 4.247547  |
| 285 | 1 | 0 | 7.094019  | 6.240935  | 4.628915  |
| 286 | 1 | 0 | 8.220958  | 4.944698  | 4.042290  |
| 287 | 1 | 0 | 8.858679  | 6.317517  | 5.042813  |
| 288 | 1 | 0 | 2.200260  | -1.189430 | 0.334307  |

AP Pl (Ac-AAAAAA-NHMe)<sub>5</sub>

|    |   |   |           |            |           |
|----|---|---|-----------|------------|-----------|
| 1  | 6 | 0 | 6.295902  | -9.071525  | -1.844276 |
| 2  | 7 | 0 | 5.262010  | -8.699871  | -0.876424 |
| 3  | 1 | 0 | 5.181644  | -7.713776  | -0.615287 |
| 4  | 6 | 0 | 4.302996  | -9.574523  | -0.484798 |
| 5  | 8 | 0 | 4.198148  | -10.737162 | -0.889599 |
| 6  | 6 | 0 | 3.338434  | -9.014155  | 0.588289  |
| 7  | 7 | 0 | 2.049276  | -9.700805  | 0.426765  |
| 8  | 1 | 0 | 2.104627  | -10.674218 | 0.144081  |
| 9  | 6 | 0 | 7.560001  | -8.233280  | -1.544811 |
| 10 | 8 | 0 | 7.477842  | -7.104534  | -1.039704 |
| 11 | 7 | 0 | 8.729047  | -8.809371  | -1.896682 |
| 12 | 1 | 0 | 8.739401  | -9.694450  | -2.395195 |
| 13 | 6 | 0 | 10.014791 | -8.097134  | -1.867810 |
| 14 | 6 | 0 | 10.720079 | -8.366939  | -3.220233 |
| 15 | 8 | 0 | 10.568598 | -9.446469  | -3.803756 |
| 16 | 7 | 0 | 11.502877 | -7.347310  | -3.646537 |
| 17 | 1 | 0 | 11.436439 | -6.454576  | -3.152217 |
| 18 | 1 | 0 | 6.504872  | -10.140095 | -1.705083 |
| 19 | 1 | 0 | 9.808307  | -7.029000  | -1.751507 |
| 20 | 6 | 0 | -1.663603 | -4.912940  | -0.340912 |
| 21 | 6 | 0 | -2.706521 | -5.551216  | 0.606893  |
| 22 | 8 | 0 | -2.529754 | -6.687909  | 1.073298  |
| 23 | 7 | 0 | -3.806864 | -4.799520  | 0.822560  |
| 24 | 1 | 0 | -3.824788 | -3.832525  | 0.485828  |
| 25 | 6 | 0 | -4.940437 | -5.273177  | 1.632386  |
| 26 | 6 | 0 | -6.252722 | -4.911217  | 0.897759  |
| 27 | 8 | 0 | -6.406187 | -3.788768  | 0.385562  |
| 28 | 7 | 0 | -7.193114 | -5.877661  | 0.899729  |
| 29 | 1 | 0 | -6.954675 | -6.808365  | 1.259646  |
| 30 | 7 | 0 | -0.313982 | -5.196166  | 0.171636  |
| 31 | 1 | 0 | -0.080045 | -6.164598  | 0.406087  |
| 32 | 6 | 0 | 0.639743  | -4.246446  | 0.248417  |
| 33 | 8 | 0 | 0.473960  | -3.063414  | -0.094597 |
| 34 | 6 | 0 | 1.986567  | -4.716246  | 0.848808  |
| 35 | 7 | 0 | 3.081083  | -4.105234  | 0.080150  |
| 36 | 1 | 0 | 3.056698  | -3.092944  | -0.073333 |
| 37 | 1 | 0 | -1.787108 | -3.825959  | -0.362701 |
| 38 | 1 | 0 | -4.849273 | -6.359255  | 1.729727  |
| 39 | 1 | 0 | 2.082110  | -5.802627  | 0.756528  |
| 40 | 6 | 0 | -0.371283 | -9.924975  | 0.112534  |
| 41 | 7 | 0 | -1.505433 | -9.433445  | 0.897653  |

|    |   |   |            |            |           |
|----|---|---|------------|------------|-----------|
| 42 | 1 | 0 | -1.641749  | -8.422223  | 0.967243  |
| 43 | 6 | 0 | -2.474327  | -10.268724 | 1.355362  |
| 44 | 8 | 0 | -2.506178  | -11.486723 | 1.156854  |
| 45 | 6 | 0 | -3.544423  | -9.569315  | 2.227233  |
| 46 | 7 | 0 | -4.827510  | -10.249452 | 2.005585  |
| 47 | 1 | 0 | -4.797607  | -11.261742 | 1.958067  |
| 48 | 6 | 0 | -5.986845  | -9.589464  | 1.788063  |
| 49 | 8 | 0 | -6.073965  | -8.351885  | 1.807507  |
| 50 | 6 | 0 | 0.862108   | -9.057221  | 0.450997  |
| 51 | 8 | 0 | 0.747455   | -7.847931  | 0.699491  |
| 52 | 1 | 0 | -0.203852  | -10.968130 | 0.409417  |
| 53 | 1 | 0 | -3.664933  | -8.526028  | 1.920085  |
| 54 | 6 | 0 | 5.135385   | -4.008114  | -1.233466 |
| 55 | 6 | 0 | 4.150382   | -4.809899  | -0.349174 |
| 56 | 8 | 0 | 4.332378   | -6.015925  | -0.118416 |
| 57 | 7 | 0 | 6.517623   | -4.375782  | -0.889005 |
| 58 | 1 | 0 | 6.767034   | -5.368135  | -0.894937 |
| 59 | 6 | 0 | 7.477638   | -3.449400  | -0.688095 |
| 60 | 8 | 0 | 7.282485   | -2.223195  | -0.744165 |
| 61 | 6 | 0 | 8.873926   | -4.015127  | -0.327727 |
| 62 | 7 | 0 | 9.911285   | -3.213438  | -0.989490 |
| 63 | 1 | 0 | 9.950010   | -2.209313  | -0.797978 |
| 64 | 6 | 0 | 10.816892  | -3.751445  | -1.840692 |
| 65 | 8 | 0 | 10.856408  | -4.963392  | -2.123118 |
| 66 | 1 | 0 | 5.024710   | -2.936267  | -1.043889 |
| 67 | 1 | 0 | 8.968523   | -5.039549  | -0.701701 |
| 68 | 6 | 0 | 11.801574  | -2.771787  | -2.458559 |
| 69 | 1 | 0 | 11.677789  | -1.754436  | -2.080972 |
| 70 | 1 | 0 | 12.817160  | -3.126265  | -2.253624 |
| 71 | 1 | 0 | 11.662313  | -2.781788  | -3.545159 |
| 72 | 6 | 0 | 12.273644  | -7.424244  | -4.877557 |
| 73 | 1 | 0 | 12.258115  | -8.457407  | -5.230806 |
| 74 | 1 | 0 | 11.846350  | -6.780128  | -5.657453 |
| 75 | 1 | 0 | 13.311390  | -7.117503  | -4.700418 |
| 76 | 6 | 0 | -8.514776  | -5.683018  | 0.279944  |
| 77 | 1 | 0 | -8.626301  | -4.610574  | 0.091782  |
| 78 | 6 | 0 | -7.215144  | -10.477288 | 1.474830  |
| 79 | 1 | 0 | -7.051912  | -11.494265 | 1.853839  |
| 80 | 1 | 0 | -8.728383  | -9.034389  | 1.973147  |
| 81 | 6 | 0 | -8.923203  | -10.669473 | 3.236061  |
| 82 | 6 | 0 | -10.096030 | -9.982735  | 3.924177  |
| 83 | 1 | 0 | -10.325489 | -9.003716  | 3.495110  |
| 84 | 1 | 0 | -10.971946 | -10.635991 | 3.849817  |



|     |   |   |            |            |           |
|-----|---|---|------------|------------|-----------|
| 85  | 1 | 0 | -9.857244  | -9.874667  | 4.987258  |
| 86  | 8 | 0 | -8.505665  | -11.771730 | 3.602575  |
| 87  | 7 | 0 | -8.386965  | -9.972236  | 2.187650  |
| 88  | 6 | 0 | -9.604733  | -6.171050  | 1.262676  |
| 89  | 1 | 0 | -10.516423 | -4.338070  | 1.117616  |
| 90  | 6 | 0 | -11.709807 | -5.599628  | 2.378689  |
| 91  | 1 | 0 | -12.554878 | -4.952873  | 2.124992  |
| 92  | 1 | 0 | -11.999987 | -6.645638  | 2.246615  |
| 93  | 1 | 0 | -11.454161 | -5.449282  | 3.436191  |
| 94  | 8 | 0 | -9.565744  | -7.309621  | 1.756465  |
| 95  | 7 | 0 | -10.591057 | -5.283485  | 1.503297  |
| 96  | 6 | 0 | -8.694925  | -6.431744  | -1.019128 |
| 97  | 1 | 0 | -7.931684  | -6.111955  | -1.769321 |
| 98  | 1 | 0 | -8.603915  | -7.535485  | -0.864757 |
| 99  | 1 | 0 | -9.710779  | -6.213586  | -1.430398 |
| 100 | 6 | 0 | -7.377403  | -10.527871 | -0.025403 |
| 101 | 1 | 0 | -7.556762  | -9.508567  | -0.448234 |
| 102 | 1 | 0 | -6.448380  | -10.946140 | -0.484254 |
| 103 | 1 | 0 | -8.238451  | -11.182802 | -0.304606 |
| 104 | 6 | 0 | -3.073446  | -9.599239  | 3.661739  |
| 105 | 1 | 0 | -2.901673  | -10.645572 | 4.013940  |
| 106 | 1 | 0 | -2.113933  | -9.031819  | 3.742882  |
| 107 | 1 | 0 | -3.827156  | -9.118947  | 4.332328  |
| 108 | 6 | 0 | -5.004003  | -4.669477  | 3.015622  |
| 109 | 1 | 0 | -4.078133  | -4.911175  | 3.592154  |
| 110 | 1 | 0 | -5.115149  | -3.558126  | 2.969652  |
| 111 | 1 | 0 | -5.882407  | -5.094105  | 3.560874  |
| 112 | 6 | 0 | -1.914614  | -5.456106  | -1.728544 |
| 113 | 1 | 0 | -1.197162  | -5.011310  | -2.460275 |
| 114 | 1 | 0 | -1.806116  | -6.568485  | -1.755883 |
| 115 | 1 | 0 | -2.953274  | -5.190397  | -2.044201 |
| 116 | 6 | 0 | -0.573499  | -9.890721  | -1.385249 |
| 117 | 1 | 0 | -0.759573  | -8.849886  | -1.747660 |
| 118 | 1 | 0 | 0.337602   | -10.289139 | -1.894771 |
| 119 | 1 | 0 | -1.446756  | -10.526968 | -1.671663 |
| 120 | 6 | 0 | 1.988400   | -4.358990  | 2.316453  |
| 121 | 1 | 0 | 2.940628   | -4.688144  | 2.799200  |
| 122 | 1 | 0 | 1.875996   | -3.257087  | 2.467119  |
| 123 | 1 | 0 | 1.136803   | -4.877747  | 2.821369  |
| 124 | 6 | 0 | 3.971218   | -9.205570  | 1.945551  |
| 125 | 1 | 0 | 4.208093   | -10.279885 | 2.139774  |
| 126 | 1 | 0 | 4.919100   | -8.614776  | 1.992017  |
| 127 | 1 | 0 | 3.288061   | -8.842156  | 2.751665  |

|     |   |   |           |           |           |
|-----|---|---|-----------|-----------|-----------|
| 128 | 6 | 0 | 4.776257  | -4.284258 | -2.675476 |
| 129 | 1 | 0 | 4.865504  | -5.372482 | -2.915619 |
| 130 | 1 | 0 | 3.721890  | -3.962648 | -2.859527 |
| 131 | 1 | 0 | 5.445936  | -3.713074 | -3.363488 |
| 132 | 6 | 0 | 5.914611  | -8.856215 | -3.291389 |
| 133 | 1 | 0 | 5.697741  | -7.779981 | -3.500491 |
| 134 | 1 | 0 | 6.750839  | -9.187461 | -3.954352 |
| 135 | 1 | 0 | 5.005369  | -9.456293 | -3.542797 |
| 136 | 6 | 0 | 8.987154  | -4.039646 | 1.178057  |
| 137 | 1 | 0 | 8.880106  | -3.014671 | 1.611048  |
| 138 | 1 | 0 | 8.180005  | -4.690402 | 1.595724  |
| 139 | 1 | 0 | 9.975504  | -4.455192 | 1.491965  |
| 140 | 6 | 0 | 10.934300 | -8.535095 | -0.754114 |
| 141 | 1 | 0 | 10.448248 | -8.385422 | 0.240655  |
| 142 | 1 | 0 | 11.213372 | -9.612309 | -0.853817 |
| 143 | 1 | 0 | 11.866153 | -7.918815 | -0.789946 |
| 144 | 6 | 0 | 4.576120  | 9.986383  | 0.647177  |
| 145 | 7 | 0 | 3.157930  | 10.357935 | 0.757187  |
| 146 | 1 | 0 | 2.969211  | 11.275183 | 1.147610  |
| 147 | 6 | 0 | 2.148921  | 9.475285  | 0.572994  |
| 148 | 8 | 0 | 2.322566  | 8.311738  | 0.187382  |
| 149 | 6 | 0 | 0.738238  | 10.008172 | 0.913653  |
| 150 | 7 | 0 | -0.230776 | 9.337141  | 0.045095  |
| 151 | 1 | 0 | -0.121796 | 8.332225  | -0.117688 |
| 152 | 6 | 0 | 5.295518  | 10.486542 | 1.923025  |
| 153 | 8 | 0 | 4.970696  | 11.549973 | 2.461367  |
| 154 | 7 | 0 | 6.304312  | 9.677893  | 2.339300  |
| 155 | 1 | 0 | 6.407795  | 8.749108  | 1.916436  |
| 156 | 6 | 0 | 7.110958  | 10.004827 | 3.517904  |
| 157 | 6 | 0 | 8.605697  | 9.858654  | 3.151675  |
| 158 | 8 | 0 | 9.048361  | 8.829556  | 2.628079  |
| 159 | 7 | 0 | 9.384581  | 10.925149 | 3.472614  |
| 160 | 1 | 0 | 8.928339  | 11.751263 | 3.835435  |
| 161 | 1 | 0 | 4.629498  | 8.895514  | 0.582182  |
| 162 | 1 | 0 | 0.671175  | 11.082907 | 0.701414  |
| 163 | 1 | 0 | 6.863915  | 11.042077 | 3.776397  |
| 164 | 6 | 0 | -2.562230 | 4.645930  | -1.352534 |
| 165 | 6 | 0 | -3.756368 | 3.909017  | -0.701666 |
| 166 | 8 | 0 | -3.651484 | 2.726993  | -0.339646 |
| 167 | 7 | 0 | -4.891623 | 4.631818  | -0.603601 |
| 168 | 1 | 0 | -4.885377 | 5.622809  | -0.853959 |
| 169 | 6 | 0 | -6.138927 | 4.058012  | -0.071747 |
| 170 | 6 | 0 | -7.291406 | 4.440407  | -1.026509 |

|     |   |   |           |           |           |
|-----|---|---|-----------|-----------|-----------|
| 171 | 8 | 0 | -7.426320 | 5.612626  | -1.416473 |
| 172 | 7 | 0 | -8.120007 | 3.429026  | -1.359287 |
| 173 | 1 | 0 | -7.900569 | 2.475787  | -1.048548 |
| 174 | 7 | 0 | -1.346698 | 4.331591  | -0.587085 |
| 175 | 1 | 0 | -1.127708 | 3.344980  | -0.412506 |
| 176 | 6 | 0 | -0.474475 | 5.281023  | -0.191634 |
| 177 | 8 | 0 | -0.589372 | 6.490867  | -0.451432 |
| 178 | 6 | 0 | 0.688455  | 4.765882  | 0.686462  |
| 179 | 7 | 0 | 1.937653  | 5.418590  | 0.263703  |
| 180 | 1 | 0 | 1.950162  | 6.438251  | 0.191366  |
| 181 | 1 | 0 | -2.712597 | 5.728995  | -1.304404 |
| 182 | 1 | 0 | -6.013762 | 2.971515  | -0.041345 |
| 183 | 1 | 0 | 0.818256  | 3.688344  | 0.546895  |
| 184 | 6 | 0 | -2.231424 | 9.104019  | -1.330121 |
| 185 | 7 | 0 | -3.621719 | 9.553788  | -1.179709 |
| 186 | 1 | 0 | -3.738507 | 10.543638 | -0.984711 |
| 187 | 6 | 0 | -4.667785 | 8.704305  | -1.076991 |
| 188 | 8 | 0 | -4.568247 | 7.476722  | -1.206339 |
| 189 | 6 | 0 | -6.021867 | 9.374797  | -0.750245 |
| 190 | 7 | 0 | -7.097960 | 8.520455  | -1.258098 |
| 191 | 1 | 0 | -6.955531 | 7.506413  | -1.272080 |
| 192 | 6 | 0 | -8.309733 | 9.031707  | -1.579755 |
| 193 | 8 | 0 | -8.609800 | 10.228586 | -1.490393 |
| 194 | 6 | 0 | -1.360525 | 9.958191  | -0.376253 |
| 195 | 8 | 0 | -1.683459 | 11.114439 | -0.083833 |
| 196 | 1 | 0 | -2.179504 | 8.049334  | -1.043983 |
| 197 | 1 | 0 | -6.096295 | 10.340588 | -1.267467 |
| 198 | 6 | 0 | 4.292889  | 5.558722  | -0.394667 |
| 199 | 6 | 0 | 3.078994  | 4.722465  | 0.078207  |
| 200 | 8 | 0 | 3.177132  | 3.495183  | 0.233108  |
| 201 | 7 | 0 | 5.494285  | 5.085699  | 0.309783  |
| 202 | 1 | 0 | 5.731502  | 4.089513  | 0.248641  |
| 203 | 6 | 0 | 6.307867  | 5.911953  | 0.995229  |
| 204 | 8 | 0 | 6.148368  | 7.143251  | 1.072706  |
| 205 | 6 | 0 | 7.462402  | 5.209849  | 1.749330  |
| 206 | 7 | 0 | 8.684593  | 6.015688  | 1.634932  |
| 207 | 1 | 0 | 8.657304  | 6.988829  | 1.940595  |
| 208 | 6 | 0 | 9.855368  | 5.499028  | 1.189723  |
| 209 | 8 | 0 | 9.993027  | 4.312258  | 0.846671  |
| 210 | 1 | 0 | 4.150531  | 6.612154  | -0.134249 |
| 211 | 1 | 0 | 7.670065  | 4.238831  | 1.289590  |
| 212 | 6 | 0 | 11.018566 | 6.475432  | 1.115495  |
| 213 | 1 | 0 | 10.760591 | 7.469274  | 1.488605  |

|     |   |   |            |           |           |
|-----|---|---|------------|-----------|-----------|
| 214 | 1 | 0 | 11.853134  | 6.066473  | 1.694409  |
| 215 | 1 | 0 | 11.344228  | 6.546933  | 0.072175  |
| 216 | 6 | 0 | 10.821004  | 10.973029 | 3.230045  |
| 217 | 1 | 0 | 11.158210  | 9.963180  | 2.990140  |
| 218 | 1 | 0 | 11.061864  | 11.634814 | 2.388914  |
| 219 | 1 | 0 | 11.345856  | 11.326160 | 4.124310  |
| 220 | 6 | 0 | -9.291614  | 3.628532  | -2.227409 |
| 221 | 1 | 0 | -9.368702  | 4.706064  | -2.411843 |
| 222 | 6 | 0 | -9.331214  | 7.991499  | -2.104747 |
| 223 | 1 | 0 | -9.338637  | 7.124585  | -1.434344 |
| 224 | 1 | 0 | -10.617641 | 9.649439  | -1.980710 |
| 225 | 6 | 0 | -11.805869 | 7.945921  | -2.053253 |
| 226 | 6 | 0 | -13.078960 | 8.772499  | -1.963024 |
| 227 | 1 | 0 | -12.892806 | 9.849689  | -1.918470 |
| 228 | 1 | 0 | -13.702938 | 8.550536  | -2.834623 |
| 229 | 1 | 0 | -13.634918 | 8.465635  | -1.071294 |
| 230 | 8 | 0 | -11.852443 | 6.705142  | -2.109466 |
| 231 | 7 | 0 | -10.645812 | 8.637010  | -2.061798 |
| 232 | 6 | 0 | -10.551856 | 3.103313  | -1.499768 |
| 233 | 1 | 0 | -11.504805 | 4.917102  | -1.778062 |
| 234 | 6 | 0 | -12.851039 | 3.579444  | -0.812972 |
| 235 | 1 | 0 | -13.575414 | 4.377009  | -0.993700 |
| 236 | 1 | 0 | -13.228643 | 2.641397  | -1.233777 |
| 237 | 1 | 0 | -12.730239 | 3.440031  | 0.268571  |
| 238 | 8 | 0 | -10.583992 | 1.954171  | -1.027692 |
| 239 | 7 | 0 | -11.592535 | 3.955504  | -1.443284 |
| 240 | 6 | 0 | -9.191824  | 2.912344  | -3.552879 |
| 241 | 1 | 0 | -8.302271  | 3.265898  | -4.128569 |
| 242 | 1 | 0 | -9.105560  | 1.806721  | -3.407463 |
| 243 | 1 | 0 | -10.110775 | 3.120468  | -4.153658 |
| 244 | 6 | 0 | -8.912439  | 7.506964  | -3.471286 |
| 245 | 1 | 0 | -8.730891  | 8.355429  | -4.173494 |
| 246 | 1 | 0 | -7.974041  | 6.904576  | -3.373668 |
| 247 | 1 | 0 | -9.706028  | 6.848810  | -3.905286 |
| 248 | 6 | 0 | -6.077917  | 9.643292  | 0.736650  |
| 249 | 1 | 0 | -5.975978  | 8.700640  | 1.327245  |
| 250 | 1 | 0 | -5.251312  | 10.337190 | 1.025860  |
| 251 | 1 | 0 | -7.051844  | 10.124759 | 1.002158  |
| 252 | 6 | 0 | -6.499785  | 4.547790  | 1.310335  |
| 253 | 1 | 0 | -5.693199  | 4.294180  | 2.040438  |
| 254 | 1 | 0 | -6.655293  | 5.654450  | 1.321222  |
| 255 | 1 | 0 | -7.445263  | 4.050968  | 1.639614  |
| 256 | 6 | 0 | -2.498802  | 4.230535  | -2.803285 |

|     |   |   |           |           |           |
|-----|---|---|-----------|-----------|-----------|
| 257 | 1 | 0 | -1.658049 | 4.749894  | -3.324285 |
| 258 | 1 | 0 | -2.350770 | 3.126731  | -2.903117 |
| 259 | 1 | 0 | -3.456074 | 4.509758  | -3.307899 |
| 260 | 6 | 0 | -1.685580 | 9.244896  | -2.730525 |
| 261 | 1 | 0 | -1.654793 | 10.313818 | -3.053493 |
| 262 | 1 | 0 | -0.647804 | 8.830100  | -2.759717 |
| 263 | 1 | 0 | -2.314867 | 8.673889  | -3.456204 |
| 264 | 6 | 0 | 0.321152  | 5.027886  | 2.128654  |
| 265 | 1 | 0 | 1.123532  | 4.657314  | 2.811925  |
| 266 | 1 | 0 | 0.168789  | 6.119084  | 2.317732  |
| 267 | 1 | 0 | -0.626955 | 4.487504  | 2.369899  |
| 268 | 6 | 0 | 0.505490  | 9.807982  | 2.394156  |
| 269 | 1 | 0 | 0.559927  | 8.726997  | 2.672917  |
| 270 | 1 | 0 | 1.279948  | 10.366290 | 2.974610  |
| 271 | 1 | 0 | -0.501802 | 10.197577 | 2.682681  |
| 272 | 6 | 0 | 4.380756  | 5.438029  | -1.897258 |
| 273 | 1 | 0 | 4.520829  | 4.374242  | -2.211882 |
| 274 | 1 | 0 | 3.435688  | 5.823959  | -2.352315 |
| 275 | 1 | 0 | 5.235953  | 6.039433  | -2.291029 |
| 276 | 6 | 0 | 5.274811  | 10.577940 | -0.552553 |
| 277 | 1 | 0 | 5.280672  | 11.694511 | -0.513523 |
| 278 | 1 | 0 | 6.331621  | 10.214106 | -0.573479 |
| 279 | 1 | 0 | 4.771677  | 10.258895 | -1.497813 |
| 280 | 6 | 0 | 7.007495  | 4.983522  | 3.172183  |
| 281 | 1 | 0 | 6.763012  | 5.948691  | 3.680255  |
| 282 | 1 | 0 | 6.093353  | 4.340344  | 3.166597  |
| 283 | 1 | 0 | 7.801908  | 4.464135  | 3.761380  |
| 284 | 6 | 0 | 6.842993  | 9.131008  | 4.720501  |
| 285 | 1 | 0 | 5.775090  | 9.215227  | 5.037771  |
| 286 | 1 | 0 | 7.064244  | 8.057886  | 4.496706  |
| 287 | 1 | 0 | 7.492696  | 9.457693  | 5.568721  |
| 288 | 1 | 0 | 3.176325  | -7.943711 | 0.429600  |
| 289 | 6 | 0 | 5.527565  | 0.604138  | -0.993654 |
| 290 | 7 | 0 | 4.242919  | 0.883817  | -0.334379 |
| 291 | 1 | 0 | 4.004513  | 1.857954  | -0.128125 |
| 292 | 6 | 0 | 3.346837  | -0.087163 | -0.058965 |
| 293 | 8 | 0 | 3.505196  | -1.284095 | -0.347183 |
| 294 | 6 | 0 | 2.086007  | 0.387881  | 0.700670  |
| 295 | 7 | 0 | 0.903567  | -0.237529 | 0.090641  |
| 296 | 1 | 0 | 0.886888  | -1.258920 | 0.001967  |
| 297 | 6 | 0 | 6.656873  | 1.258939  | -0.165668 |
| 298 | 8 | 0 | 6.555486  | 2.432481  | 0.232406  |
| 299 | 7 | 0 | 7.734138  | 0.477648  | 0.050196  |

|     |   |   |            |           |           |
|-----|---|---|------------|-----------|-----------|
| 300 | 1 | 0 | 7.710696   | -0.503403 | -0.249403 |
| 301 | 6 | 0 | 8.914645   | 0.958977  | 0.784657  |
| 302 | 6 | 0 | 10.170897  | 0.759634  | -0.094895 |
| 303 | 8 | 0 | 10.438442  | -0.344360 | -0.599378 |
| 304 | 7 | 0 | 10.943584  | 1.853479  | -0.241813 |
| 305 | 1 | 0 | 10.630920  | 2.745813  | 0.148397  |
| 306 | 1 | 0 | 5.655124   | -0.482641 | -1.016072 |
| 307 | 1 | 0 | 8.756213   | 2.024333  | 0.979869  |
| 308 | 6 | 0 | -1.300569  | -0.342895 | -0.954757 |
| 309 | 7 | 0 | -2.598260  | 0.049332  | -0.384874 |
| 310 | 1 | 0 | -2.835815  | 1.044802  | -0.360590 |
| 311 | 6 | 0 | -3.517898  | -0.860225 | 0.003472  |
| 312 | 8 | 0 | -3.363623  | -2.088416 | -0.087389 |
| 313 | 6 | 0 | -4.797117  | -0.261726 | 0.635678  |
| 314 | 7 | 0 | -5.972517  | -0.972479 | 0.109797  |
| 315 | 1 | 0 | -6.003593  | -1.993639 | 0.202027  |
| 316 | 6 | 0 | -7.043260  | -0.319779 | -0.385880 |
| 317 | 8 | 0 | -7.137041  | 0.919072  | -0.445544 |
| 318 | 6 | 0 | -0.184972  | 0.474857  | -0.263959 |
| 319 | 8 | 0 | -0.300943  | 1.701584  | -0.098784 |
| 320 | 1 | 0 | -1.164817  | -1.410813 | -0.756744 |
| 321 | 1 | 0 | -4.898778  | 0.790776  | 0.354354  |
| 322 | 6 | 0 | 12.176220  | 1.822391  | -1.015653 |
| 323 | 1 | 0 | 12.743152  | 0.915043  | -0.786150 |
| 324 | 1 | 0 | 11.976941  | 1.833354  | -2.095257 |
| 325 | 1 | 0 | 12.776092  | 2.699504  | -0.758026 |
| 326 | 6 | 0 | -8.167197  | -1.227646 | -0.938724 |
| 327 | 1 | 0 | -8.063622  | -2.240317 | -0.536162 |
| 328 | 1 | 0 | -9.709179  | 0.258903  | -0.700305 |
| 329 | 6 | 0 | -10.380010 | -1.494452 | 0.134608  |
| 330 | 6 | 0 | -11.669095 | -0.802058 | 0.546883  |
| 331 | 1 | 0 | -11.713552 | 0.237731  | 0.215421  |
| 332 | 1 | 0 | -12.512360 | -1.362916 | 0.130506  |
| 333 | 1 | 0 | -11.750580 | -0.845907 | 1.638552  |
| 334 | 8 | 0 | -10.192798 | -2.700209 | 0.379154  |
| 335 | 7 | 0 | -9.468415  | -0.712716 | -0.490766 |
| 336 | 6 | 0 | -8.013952  | -1.281397 | -2.440719 |
| 337 | 1 | 0 | -8.106249  | -0.263932 | -2.894796 |
| 338 | 1 | 0 | -7.006677  | -1.695003 | -2.692324 |
| 339 | 1 | 0 | -8.792170  | -1.943588 | -2.892090 |
| 340 | 6 | 0 | -1.188293  | -0.106501 | -2.442714 |
| 341 | 1 | 0 | -1.314987  | 0.975908  | -2.692392 |
| 342 | 1 | 0 | -0.180006  | -0.438144 | -2.792398 |

|     |   |   |           |           |           |
|-----|---|---|-----------|-----------|-----------|
| 343 | 1 | 0 | -1.964837 | -0.691612 | -2.992830 |
| 344 | 6 | 0 | 5.620119  | 1.136472  | -2.403918 |
| 345 | 1 | 0 | 5.504141  | 2.248266  | -2.426601 |
| 346 | 1 | 0 | 6.618919  | 0.872962  | -2.830566 |
| 347 | 1 | 0 | 4.828144  | 0.682937  | -3.048139 |
| 348 | 6 | 0 | 9.146207  | 0.246093  | 2.095049  |
| 349 | 1 | 0 | 8.265272  | 0.363860  | 2.771598  |
| 350 | 1 | 0 | 9.328359  | -0.845389 | 1.933693  |
| 351 | 1 | 0 | 10.042377 | 0.684846  | 2.598146  |
| 352 | 1 | 0 | 1.971172  | 1.471511  | 0.602650  |
| 353 | 6 | 0 | -4.651275 | -0.352209 | 2.136572  |
| 354 | 1 | 0 | -4.533711 | -1.413074 | 2.469558  |
| 355 | 1 | 0 | -3.747333 | 0.223636  | 2.453060  |
| 356 | 1 | 0 | -5.545569 | 0.082514  | 2.645688  |
| 357 | 6 | 0 | 2.273214  | 0.048502  | 2.160575  |
| 358 | 1 | 0 | 2.407410  | -1.051721 | 2.307527  |
| 359 | 1 | 0 | 3.181511  | 0.573451  | 2.545667  |
| 360 | 1 | 0 | 1.390255  | 0.381630  | 2.758315  |

AP PI (Ac-AAAAAA-NHMe)<sub>6</sub>

|    |   |   |            |           |           |
|----|---|---|------------|-----------|-----------|
| 1  | 6 | 0 | -11.991386 | 5.098015  | 2.337144  |
| 2  | 7 | 0 | -11.563472 | 4.174341  | 1.284644  |
| 3  | 1 | 0 | -10.591904 | 4.225680  | 0.967223  |
| 4  | 6 | 0 | -12.344374 | 3.143799  | 0.878001  |
| 5  | 8 | 0 | -13.461313 | 2.878688  | 1.335361  |
| 6  | 6 | 0 | -11.741702 | 2.315647  | -0.282744 |
| 7  | 7 | 0 | -12.271931 | 0.949576  | -0.171439 |
| 8  | 1 | 0 | -13.225750 | 0.878825  | 0.169116  |
| 9  | 6 | 0 | -11.331491 | 6.470589  | 2.070649  |
| 10 | 8 | 0 | -10.230884 | 6.555663  | 1.507654  |
| 11 | 7 | 0 | -12.026232 | 7.538634  | 2.516908  |
| 12 | 1 | 0 | -12.878024 | 7.412286  | 3.055704  |
| 13 | 6 | 0 | -11.480899 | 8.904075  | 2.526246  |
| 14 | 6 | 0 | -11.762830 | 9.501485  | 3.927028  |
| 15 | 8 | 0 | -12.785705 | 9.191717  | 4.549022  |
| 16 | 7 | 0 | -10.822896 | 10.379592 | 4.350444  |
| 17 | 1 | 0 | -9.952124  | 10.441580 | 3.817135  |
| 18 | 1 | 0 | -13.084105 | 5.180369  | 2.274626  |
| 19 | 1 | 0 | -10.403283 | 8.840234  | 2.347702  |
| 20 | 6 | 0 | -7.073441  | -2.213667 | 0.150500  |
| 21 | 6 | 0 | -7.633660  | -3.279911 | -0.820363 |
| 22 | 8 | 0 | -8.803210  | -3.214513 | -1.231173 |
| 23 | 7 | 0 | -6.773951  | -4.277511 | -1.117907 |
| 24 | 1 | 0 | -5.796331  | -4.199211 | -0.822854 |
| 25 | 6 | 0 | -7.153036  | -5.422902 | -1.960395 |
| 26 | 6 | 0 | -6.612630  | -6.715074 | -1.303209 |
| 27 | 8 | 0 | -5.455637  | -6.762212 | -0.850864 |
| 28 | 7 | 0 | -7.468760  | -7.757277 | -1.303323 |
| 29 | 1 | 0 | -8.437111  | -7.611154 | -1.609072 |
| 30 | 7 | 0 | -7.527764  | -0.882367 | -0.280903 |
| 31 | 1 | 0 | -8.526145  | -0.747767 | -0.461464 |
| 32 | 6 | 0 | -6.695601  | 0.177728  | -0.329216 |
| 33 | 8 | 0 | -5.489378  | 0.129064  | -0.034509 |
| 34 | 6 | 0 | -7.334828  | 1.495083  | -0.830610 |
| 35 | 7 | 0 | -6.815117  | 2.606334  | -0.019565 |
| 36 | 1 | 0 | -5.800473  | 2.686326  | 0.096403  |
| 37 | 1 | 0 | -5.979670  | -2.213888 | 0.121806  |
| 38 | 1 | 0 | -8.245736  | -5.451837 | -2.010726 |
| 39 | 1 | 0 | -8.420338  | 1.464066  | -0.694208 |
| 40 | 6 | 0 | -12.209910 | -1.493211 | 0.007263  |
| 41 | 7 | 0 | -11.634264 | -2.525335 | -0.857218 |



|    |   |   |            |            |           |
|----|---|---|------------|------------|-----------|
| 42 | 1 | 0 | -10.619812 | -2.535363  | -0.987727 |
| 43 | 6 | 0 | -12.375459 | -3.567346  | -1.315310 |
| 44 | 8 | 0 | -13.567660 | -3.752521  | -1.053204 |
| 45 | 6 | 0 | -11.609112 | -4.510672  | -2.273157 |
| 46 | 7 | 0 | -12.130071 | -5.870896  | -2.083031 |
| 47 | 1 | 0 | -13.134915 | -5.956219  | -1.977977 |
| 48 | 6 | 0 | -11.334681 | -6.956095  | -1.954572 |
| 49 | 8 | 0 | -10.098186 | -6.901798  | -2.042543 |
| 50 | 6 | 0 | -11.504316 | -0.153692  | -0.303300 |
| 51 | 8 | 0 | -10.307403 | -0.117282  | -0.624404 |
| 52 | 1 | 0 | -13.278693 | -1.431636  | -0.234224 |
| 53 | 1 | 0 | -10.543894 | -4.525329  | -2.023135 |
| 54 | 6 | 0 | -6.888266  | 4.577370   | 1.417716  |
| 55 | 6 | 0 | -7.614344  | 3.561206   | 0.503896  |
| 56 | 8 | 0 | -8.842573  | 3.616994   | 0.331519  |
| 57 | 7 | 0 | -7.417958  | 5.927774   | 1.172391  |
| 58 | 1 | 0 | -8.430351  | 6.064235   | 1.228789  |
| 59 | 6 | 0 | -6.609498  | 6.997316   | 1.015087  |
| 60 | 8 | 0 | -5.368527  | 6.938356   | 1.027828  |
| 61 | 6 | 0 | -7.337183  | 8.341729   | 0.763847  |
| 62 | 7 | 0 | -6.640826  | 9.414709   | 1.485654  |
| 63 | 1 | 0 | -5.652722  | 9.581414   | 1.278814  |
| 64 | 6 | 0 | -7.256590  | 10.197624  | 2.402397  |
| 65 | 8 | 0 | -8.459348  | 10.083859  | 2.704683  |
| 66 | 1 | 0 | -5.819618  | 4.596846   | 1.183999  |
| 67 | 1 | 0 | -8.357031  | 8.293756   | 1.158921  |
| 68 | 6 | 0 | -6.378895  | 11.243587  | 3.070814  |
| 69 | 1 | 0 | -5.360593  | 11.254500  | 2.676132  |
| 70 | 1 | 0 | -6.844284  | 12.225178  | 2.932504  |
| 71 | 1 | 0 | -6.356595  | 11.038352  | 4.146722  |
| 72 | 6 | 0 | -10.927666 | 11.071660  | 5.625253  |
| 73 | 1 | 0 | -11.943683 | 10.946104  | 6.005409  |
| 74 | 1 | 0 | -10.224856 | 10.662101  | 6.363114  |
| 75 | 1 | 0 | -10.717594 | 12.140164  | 5.497843  |
| 76 | 6 | 0 | -7.098267  | -9.073314  | -0.755913 |
| 77 | 1 | 0 | -6.012548  | -9.069100  | -0.617482 |
| 78 | 6 | 0 | -12.061895 | -8.287971  | -1.652286 |
| 79 | 1 | 0 | -13.109361 | -8.229168  | -1.974727 |
| 80 | 1 | 0 | -10.482901 | -9.598675  | -2.292282 |
| 81 | 6 | 0 | -12.167083 | -9.969626  | -3.446961 |
| 82 | 6 | 0 | -11.391571 | -11.033310 | -4.213738 |
| 83 | 1 | 0 | -10.357509 | -11.132508 | -3.873064 |
| 84 | 1 | 0 | -11.912684 | -11.990129 | -4.101177 |

|     |   |   |            |            |           |
|-----|---|---|------------|------------|-----------|
| 85  | 1 | 0 | -11.409353 | -10.773857 | -5.277239 |
| 86  | 8 | 0 | -13.337466 | -9.689989  | -3.722079 |
| 87  | 7 | 0 | -11.466374 | -9.367054  | -2.437776 |
| 88  | 6 | 0 | -7.505589  | -10.169218 | -1.768597 |
| 89  | 1 | 0 | -5.575241  | -10.866948 | -1.746385 |
| 90  | 6 | 0 | -6.747866  | -12.140991 | -3.012096 |
| 91  | 1 | 0 | -6.025460  | -12.934403 | -2.798100 |
| 92  | 1 | 0 | -7.762274  | -12.527056 | -2.880810 |
| 93  | 1 | 0 | -6.633857  | -11.832842 | -4.060186 |
| 94  | 8 | 0 | -8.664232  | -10.242293 | -2.208749 |
| 95  | 7 | 0 | -6.522614  | -11.032217 | -2.097039 |
| 96  | 6 | 0 | -7.760738  | -9.393517  | 0.562867  |
| 97  | 1 | 0 | -7.495303  | -8.630942  | 1.334616  |
| 98  | 1 | 0 | -8.873625  | -9.424037  | 0.458380  |
| 99  | 1 | 0 | -7.410014  | -10.393936 | 0.916184  |
| 100 | 6 | 0 | -12.016500 | -8.509211  | -0.159221 |
| 101 | 1 | 0 | -10.963122 | -8.585863  | 0.207348  |
| 102 | 1 | 0 | -12.512569 | -7.651511  | 0.357351  |
| 103 | 1 | 0 | -12.555098 | -9.449120  | 0.114187  |
| 104 | 6 | 0 | -11.767664 | -3.983214  | -3.679193 |
| 105 | 1 | 0 | -12.843875 | -3.914872  | -3.971457 |
| 106 | 1 | 0 | -11.314401 | -2.963332  | -3.739704 |
| 107 | 1 | 0 | -11.243876 | -4.647750  | -4.408920 |
| 108 | 6 | 0 | -6.607213  | -5.359094  | -3.367537 |
| 109 | 1 | 0 | -6.979065  | -4.445138  | -3.891426 |
| 110 | 1 | 0 | -5.489454  | -5.340896  | -3.369499 |
| 111 | 1 | 0 | -6.951004  | -6.258214  | -3.935441 |
| 112 | 6 | 0 | -7.519878  | -2.587269  | 1.545196  |
| 113 | 1 | 0 | -7.124297  | -1.857536  | 2.292876  |
| 114 | 1 | 0 | -8.634913  | -2.607365  | 1.623817  |
| 115 | 1 | 0 | -7.125426  | -3.602081  | 1.797359  |
| 116 | 6 | 0 | -12.079938 | -1.761483  | 1.489409  |
| 117 | 1 | 0 | -11.008356 | -1.843146  | 1.796497  |
| 118 | 1 | 0 | -12.553852 | -0.928281  | 2.063536  |
| 119 | 1 | 0 | -12.598434 | -2.715280  | 1.755758  |
| 120 | 6 | 0 | -7.041121  | 1.619254   | -2.307044 |
| 121 | 1 | 0 | -7.495203  | 2.552692   | -2.720142 |
| 122 | 1 | 0 | -5.940669  | 1.643087   | -2.502258 |
| 123 | 1 | 0 | -7.480802  | 0.742994   | -2.843755 |
| 124 | 6 | 0 | -12.078002 | 3.002287   | -1.584393 |
| 125 | 1 | 0 | -13.181046 | 3.127765   | -1.708893 |
| 126 | 1 | 0 | -11.597789 | 4.011714   | -1.598215 |
| 127 | 1 | 0 | -11.688513 | 2.413493   | -2.450555 |

|     |   |   |            |            |           |
|-----|---|---|------------|------------|-----------|
| 128 | 6 | 0 | -7.062583  | 4.107198   | 2.843757  |
| 129 | 1 | 0 | -8.142938  | 4.061309   | 3.127716  |
| 130 | 1 | 0 | -6.620846  | 3.086216   | 2.950619  |
| 131 | 1 | 0 | -6.538782  | 4.795411   | 3.550915  |
| 132 | 6 | 0 | -11.635834 | 4.665118   | 3.741426  |
| 133 | 1 | 0 | -10.529854 | 4.569473   | 3.871125  |
| 134 | 1 | 0 | -12.017727 | 5.416829   | 4.474654  |
| 135 | 1 | 0 | -12.106318 | 3.677145   | 3.970404  |
| 136 | 6 | 0 | -7.405581  | 8.555872   | -0.729637 |
| 137 | 1 | 0 | -6.383729  | 8.604298   | -1.180595 |
| 138 | 1 | 0 | -7.962897  | 7.707156   | -1.196902 |
| 139 | 1 | 0 | -7.942730  | 9.506241   | -0.966881 |
| 140 | 6 | 0 | -12.089383 | 9.814682   | 1.487862  |
| 141 | 1 | 0 | -11.933500 | 9.402024   | 0.461399  |
| 142 | 1 | 0 | -13.186127 | 9.948600   | 1.653477  |
| 143 | 1 | 0 | -11.593460 | 10.814647  | 1.547295  |
| 144 | 6 | 0 | 11.768862  | -5.717347  | 0.828598  |
| 145 | 7 | 0 | 12.333142  | -4.360221  | 0.860536  |
| 146 | 1 | 0 | 13.292358  | -4.286190  | 1.182659  |
| 147 | 6 | 0 | 11.583695  | -3.246316  | 0.689151  |
| 148 | 8 | 0 | 10.383783  | -3.270737  | 0.386490  |
| 149 | 6 | 0 | 12.326713  | -1.912034  | 0.931366  |
| 150 | 7 | 0 | 11.718669  | -0.886686  | 0.081481  |
| 151 | 1 | 0 | 10.700442  | -0.885323  | -0.024017 |
| 152 | 6 | 0 | 12.253731  | -6.462809  | 2.095395  |
| 153 | 8 | 0 | 13.387091  | -6.276027  | 2.550171  |
| 154 | 7 | 0 | 11.343154  | -7.333941  | 2.600936  |
| 155 | 1 | 0 | 10.385230  | -7.326780  | 2.234157  |
| 156 | 6 | 0 | 11.633403  | -8.153966  | 3.780753  |
| 157 | 6 | 0 | 11.300151  | -9.626315  | 3.447179  |
| 158 | 8 | 0 | 10.183996  | -9.960125  | 3.032195  |
| 159 | 7 | 0 | 12.307997  | -10.511955 | 3.662698  |
| 160 | 1 | 0 | 13.212326  | -10.144635 | 3.926185  |
| 161 | 1 | 0 | 10.678864  | -5.623833  | 0.835871  |
| 162 | 1 | 0 | 13.378783  | -1.999379  | 0.630495  |
| 163 | 1 | 0 | 12.702983  | -8.022829  | 3.986566  |
| 164 | 6 | 0 | 2.510843   | -2.080242  | 0.918146  |
| 165 | 6 | 0 | 1.913470   | -3.321323  | 0.214471  |
| 166 | 8 | 0 | 0.720358   | -3.348047  | -0.125758 |
| 167 | 7 | 0 | 2.771139   | -4.350170  | 0.049142  |
| 168 | 1 | 0 | 3.761114   | -4.218947  | 0.274962  |
| 169 | 6 | 0 | 2.351269   | -5.631993  | -0.537856 |
| 170 | 6 | 0 | 2.860263   | -6.775678  | 0.368291  |

|     |   |   |           |           |           |
|-----|---|---|-----------|-----------|-----------|
| 171 | 8 | 0 | 4.035788  | -6.791188 | 0.774040  |
| 172 | 7 | 0 | 1.952348  | -7.733678 | 0.640868  |
| 173 | 1 | 0 | 0.981942  | -7.608278 | 0.331217  |
| 174 | 7 | 0 | 2.054876  | -0.873697 | 0.212622  |
| 175 | 1 | 0 | 1.047299  | -0.747246 | 0.069068  |
| 176 | 6 | 0 | 2.903871  | 0.100226  | -0.171621 |
| 177 | 8 | 0 | 4.128212  | 0.085879  | 0.045053  |
| 178 | 6 | 0 | 2.251906  | 1.255232  | -0.965692 |
| 179 | 7 | 0 | 2.764918  | 2.533647  | -0.449896 |
| 180 | 1 | 0 | 3.779177  | 2.660505  | -0.389520 |
| 181 | 1 | 0 | 3.603428  | -2.101210 | 0.861229  |
| 182 | 1 | 0 | 1.257384  | -5.634051 | -0.571610 |
| 183 | 1 | 0 | 1.167947  | 1.251962  | -0.815556 |
| 184 | 6 | 0 | 11.635348 | 1.087252  | -1.347037 |
| 185 | 7 | 0 | 12.274223 | 2.408839  | -1.301655 |
| 186 | 1 | 0 | 13.280283 | 2.400257  | -1.161929 |
| 187 | 6 | 0 | 11.576443 | 3.564227  | -1.242238 |
| 188 | 8 | 0 | 10.341401 | 3.621648  | -1.315211 |
| 189 | 6 | 0 | 12.432567 | 4.836103  | -1.044654 |
| 190 | 7 | 0 | 11.683126 | 5.982525  | -1.565280 |
| 191 | 1 | 0 | 10.660107 | 5.950327  | -1.544251 |
| 192 | 6 | 0 | 12.313169 | 7.117574  | -1.949156 |
| 193 | 8 | 0 | 13.538142 | 7.285556  | -1.904322 |
| 194 | 6 | 0 | 12.440358 | 0.147780  | -0.416285 |
| 195 | 8 | 0 | 13.643172 | 0.337235  | -0.205808 |
| 196 | 1 | 0 | 10.609719 | 1.188062  | -0.980371 |
| 197 | 1 | 0 | 13.360583 | 4.754957  | -1.626593 |
| 198 | 6 | 0 | 2.656307  | 4.812422  | 0.429448  |
| 199 | 6 | 0 | 1.949722  | 3.569979  | -0.162629 |
| 200 | 8 | 0 | 0.717467  | 3.547404  | -0.311006 |
| 201 | 7 | 0 | 2.090235  | 6.023727  | -0.183245 |
| 202 | 1 | 0 | 1.075163  | 6.161879  | -0.138860 |
| 203 | 6 | 0 | 2.865693  | 6.990192  | -0.715323 |
| 204 | 8 | 0 | 4.108560  | 6.954612  | -0.732999 |
| 205 | 6 | 0 | 2.095353  | 8.163028  | -1.366643 |
| 206 | 7 | 0 | 2.731625  | 9.430585  | -0.983146 |
| 207 | 1 | 0 | 3.730001  | 9.553367  | -1.169060 |
| 208 | 6 | 0 | 2.032844  | 10.457239 | -0.445098 |
| 209 | 8 | 0 | 0.806533  | 10.414019 | -0.235566 |
| 210 | 1 | 0 | 3.723121  | 4.790256  | 0.187004  |
| 211 | 1 | 0 | 1.067060  | 8.190743  | -0.992493 |
| 212 | 6 | 0 | 2.845966  | 11.690257 | -0.085369 |
| 213 | 1 | 0 | 3.893452  | 11.605951 | -0.383544 |

|     |   |   |           |            |           |
|-----|---|---|-----------|------------|-----------|
| 214 | 1 | 0 | 2.388786  | 12.560319  | -0.567979 |
| 215 | 1 | 0 | 2.782170  | 11.841964  | 0.997842  |
| 216 | 6 | 0 | 12.183821 | -11.941724 | 3.407216  |
| 217 | 1 | 0 | 12.680266 | -12.508103 | 4.201851  |
| 218 | 1 | 0 | 11.122508 | -12.196695 | 3.391749  |
| 219 | 1 | 0 | 12.624867 | -12.217675 | 2.441063  |
| 220 | 6 | 0 | 2.281370  | -8.917641  | 1.450116  |
| 221 | 1 | 0 | 3.359483  | -8.887166  | 1.637669  |
| 222 | 6 | 0 | 11.376342 | 8.228365   | -2.487214 |
| 223 | 1 | 0 | 10.537820 | 8.358856   | -1.793783 |
| 224 | 1 | 0 | 13.170425 | 9.322717   | -2.456499 |
| 225 | 6 | 0 | 11.609351 | 10.691740  | -2.561297 |
| 226 | 6 | 0 | 12.574159 | 11.866920  | -2.550046 |
| 227 | 1 | 0 | 13.624420 | 11.563970  | -2.504325 |
| 228 | 1 | 0 | 12.410432 | 12.462945  | -3.453547 |
| 229 | 1 | 0 | 12.344140 | 12.501807  | -1.688472 |
| 230 | 8 | 0 | 10.380576 | 10.874690  | -2.602641 |
| 231 | 7 | 0 | 12.165782 | 9.462335   | -2.517980 |
| 232 | 6 | 0 | 1.914391  | -10.189049 | 0.649722  |
| 233 | 1 | 0 | 3.830654  | -10.881768 | 0.907129  |
| 234 | 6 | 0 | 2.702209  | -12.365201 | -0.151293 |
| 235 | 1 | 0 | 3.488724  | -13.062437 | 0.150273  |
| 236 | 1 | 0 | 1.725650  | -12.787689 | 0.103198  |
| 237 | 1 | 0 | 2.741693  | -12.235076 | -1.240816 |
| 238 | 8 | 0 | 0.780289  | -10.342605 | 0.165620  |
| 239 | 7 | 0 | 2.898920  | -11.103761 | 0.548137  |
| 240 | 6 | 0 | 1.550664  | -8.971560  | 2.770040  |
| 241 | 1 | 0 | 1.791530  | -8.076281  | 3.393020  |
| 242 | 1 | 0 | 0.443575  | -9.011758  | 2.616710  |
| 243 | 1 | 0 | 1.865498  | -9.887739  | 3.326949  |
| 244 | 6 | 0 | 10.804665 | 7.814269   | -3.821154 |
| 245 | 1 | 0 | 11.604596 | 7.509784   | -4.537648 |
| 246 | 1 | 0 | 10.103606 | 6.955262   | -3.667633 |
| 247 | 1 | 0 | 10.227023 | 8.660346   | -4.270546 |
| 248 | 6 | 0 | 12.814199 | 4.941410   | 0.414354  |
| 249 | 1 | 0 | 11.912634 | 4.987128   | 1.072023  |
| 250 | 1 | 0 | 13.426735 | 4.054727   | 0.709261  |
| 251 | 1 | 0 | 13.424299 | 5.863653   | 0.583393  |
| 252 | 6 | 0 | 2.882790  | -5.873589  | -1.930641 |
| 253 | 1 | 0 | 2.534236  | -5.074080  | -2.628651 |
| 254 | 1 | 0 | 4.000559  | -5.893091  | -1.940902 |
| 255 | 1 | 0 | 2.505335  | -6.858017  | -2.301498 |
| 256 | 6 | 0 | 2.097340  | -2.132015  | 2.370104  |

|     |   |   |            |           |           |
|-----|---|---|------------|-----------|-----------|
| 257 | 1 | 0 | 2.518068   | -1.261664 | 2.929915  |
| 258 | 1 | 0 | 0.984290   | -2.118157 | 2.475802  |
| 259 | 1 | 0 | 2.488103   | -3.072657 | 2.829803  |
| 260 | 6 | 0 | 11.586791  | 0.470774  | -2.724398 |
| 261 | 1 | 0 | 12.611544  | 0.271591  | -3.121719 |
| 262 | 1 | 0 | 11.026761  | -0.495419 | -2.670497 |
| 263 | 1 | 0 | 11.055779  | 1.147034  | -3.438169 |
| 264 | 6 | 0 | 2.540220   | 1.025370  | -2.430707 |
| 265 | 1 | 0 | 2.076724   | 1.828959  | -3.053104 |
| 266 | 1 | 0 | 3.640094   | 1.010019  | -2.630540 |
| 267 | 1 | 0 | 2.107277   | 0.042635  | -2.740200 |
| 268 | 6 | 0 | 12.288462  | -1.612023 | 2.412604  |
| 269 | 1 | 0 | 11.238455  | -1.517821 | 2.783044  |
| 270 | 1 | 0 | 12.793468  | -2.434757 | 2.975229  |
| 271 | 1 | 0 | 12.826439  | -0.655550 | 2.626162  |
| 272 | 6 | 0 | 2.498289   | 4.757768  | 1.930801  |
| 273 | 1 | 0 | 1.419969   | 4.768097  | 2.226113  |
| 274 | 1 | 0 | 2.964876   | 3.817777  | 2.315074  |
| 275 | 1 | 0 | 3.006235   | 5.628772  | 2.411755  |
| 276 | 6 | 0 | 12.177274  | -6.524061 | -0.379769 |
| 277 | 1 | 0 | 13.282817  | -6.682268 | -0.411695 |
| 278 | 1 | 0 | 11.673107  | -7.520949 | -0.338274 |
| 279 | 1 | 0 | 11.865620  | -6.008654 | -1.320861 |
| 280 | 6 | 0 | 2.065442   | 7.918393  | -2.857142 |
| 281 | 1 | 0 | 3.098508   | 7.874102  | -3.282217 |
| 282 | 1 | 0 | 1.553809   | 6.945524  | -3.059058 |
| 283 | 1 | 0 | 1.501817   | 8.730244  | -3.377798 |
| 284 | 6 | 0 | 10.851160  | -7.769535 | 5.013797  |
| 285 | 1 | 0 | 11.068117  | -6.712869 | 5.304409  |
| 286 | 1 | 0 | 9.750955   | -7.872988 | 4.841272  |
| 287 | 1 | 0 | 11.141626  | -8.438212 | 5.860459  |
| 288 | 1 | 0 | -10.652606 | 2.267609  | -0.187882 |
| 289 | 6 | 0 | -2.373917  | 5.490852  | 1.094491  |
| 290 | 7 | 0 | -1.972227  | 4.292443  | 0.343047  |
| 291 | 1 | 0 | -0.982187  | 4.176047  | 0.106863  |
| 292 | 6 | 0 | -2.844777  | 3.311495  | 0.033126  |
| 293 | 8 | 0 | -4.043605  | 3.315369  | 0.356942  |
| 294 | 6 | 0 | -2.257101  | 2.159411  | -0.815348 |
| 295 | 7 | 0 | -2.735776  | 0.880822  | -0.268712 |
| 296 | 1 | 0 | -3.746326  | 0.749429  | -0.157234 |
| 297 | 6 | 0 | -1.846694  | 6.739919  | 0.351201  |
| 298 | 8 | 0 | -0.679817  | 6.785045  | -0.073499 |
| 299 | 7 | 0 | -2.732590  | 7.751655  | 0.244166  |

|     |   |   |           |            |           |
|-----|---|---|-----------|------------|-----------|
| 300 | 1 | 0 | -3.700401 | 7.603936   | 0.548993  |
| 301 | 6 | 0 | -2.383542 | 9.035352   | -0.385088 |
| 302 | 6 | 0 | -2.735477 | 10.182021  | 0.590400  |
| 303 | 8 | 0 | -3.870960 | 10.282586  | 1.087366  |
| 304 | 7 | 0 | -1.738940 | 11.055441  | 0.830291  |
| 305 | 1 | 0 | -0.806472 | 10.873282  | 0.447029  |
| 306 | 1 | 0 | -3.467643 | 5.504860   | 1.130136  |
| 307 | 1 | 0 | -1.305134 | 9.016779   | -0.572751 |
| 308 | 6 | 0 | -2.576439 | -1.377307  | 0.647083  |
| 309 | 7 | 0 | -2.050348 | -2.590745  | 0.004142  |
| 310 | 1 | 0 | -1.034687 | -2.711733  | -0.045742 |
| 311 | 6 | 0 | -2.857213 | -3.587328  | -0.418588 |
| 312 | 8 | 0 | -4.092761 | -3.580604  | -0.298898 |
| 313 | 6 | 0 | -2.132828 | -4.754409  | -1.130654 |
| 314 | 7 | 0 | -2.688939 | -6.028775  | -0.650012 |
| 315 | 1 | 0 | -3.703338 | -6.167931  | -0.709677 |
| 316 | 6 | 0 | -1.904945 | -7.045300  | -0.237620 |
| 317 | 8 | 0 | -0.661848 | -7.006426  | -0.225221 |
| 318 | 6 | 0 | -1.902167 | -0.141831  | 0.007082  |
| 319 | 8 | 0 | -0.674900 | -0.114479  | -0.188473 |
| 320 | 1 | 0 | -3.656097 | -1.353106  | 0.469531  |
| 321 | 1 | 0 | -1.067691 | -4.746390  | -0.880321 |
| 322 | 6 | 0 | -1.923948 | 12.202699  | 1.706574  |
| 323 | 1 | 0 | -2.869784 | 12.704662  | 1.480032  |
| 324 | 1 | 0 | -1.943412 | 11.906023  | 2.763498  |
| 325 | 1 | 0 | -1.097419 | 12.901251  | 1.550399  |
| 326 | 6 | 0 | -2.664865 | -8.288099  | 0.282707  |
| 327 | 1 | 0 | -3.693380 | -8.282679  | -0.091931 |
| 328 | 1 | 0 | -1.019363 | -9.635529  | -0.070287 |
| 329 | 6 | 0 | -2.714961 | -10.474212 | -0.872107 |
| 330 | 6 | 0 | -1.895915 | -11.657160 | -1.363042 |
| 331 | 1 | 0 | -0.843013 | -11.587243 | -1.081027 |
| 332 | 1 | 0 | -2.331873 | -12.574360 | -0.953287 |
| 333 | 1 | 0 | -1.984524 | -11.708749 | -2.453738 |
| 334 | 8 | 0 | -3.942859 | -10.420313 | -1.066258 |
| 335 | 7 | 0 | -2.019711 | -9.501909  | -0.236246 |
| 336 | 6 | 0 | -2.696728 | -8.206511  | 1.790968  |
| 337 | 1 | 0 | -1.664110 | -8.197922  | 2.219180  |
| 338 | 1 | 0 | -3.218067 | -7.266330  | 2.096440  |
| 339 | 1 | 0 | -3.251985 | -9.075509  | 2.220348  |
| 340 | 6 | 0 | -2.328513 | -1.315792  | 2.136138  |
| 341 | 1 | 0 | -1.234561 | -1.329796  | 2.366395  |
| 342 | 1 | 0 | -2.767161 | -0.371787  | 2.542803  |

|     |   |   |           |           |           |
|-----|---|---|-----------|-----------|-----------|
| 343 | 1 | 0 | -2.811302 | -2.181929 | 2.650608  |
| 344 | 6 | 0 | -1.840711 | 5.535648  | 2.507024  |
| 345 | 1 | 0 | -0.722804 | 5.535295  | 2.519321  |
| 346 | 1 | 0 | -2.202916 | 6.467665  | 3.006227  |
| 347 | 1 | 0 | -2.203206 | 4.655818  | 3.092167  |
| 348 | 6 | 0 | -3.107946 | 9.291837  | -1.684632 |
| 349 | 1 | 0 | -2.878376 | 8.492372  | -2.430168 |
| 350 | 1 | 0 | -4.214845 | 9.327546  | -1.529348 |
| 351 | 1 | 0 | -2.776013 | 10.273649 | -2.102391 |
| 352 | 1 | 0 | -1.165091 | 2.157943  | -0.746851 |
| 353 | 6 | 0 | -2.284806 | -4.546460 | -2.619258 |
| 354 | 1 | 0 | -3.361665 | -4.540183 | -2.920180 |
| 355 | 1 | 0 | -1.829440 | -3.565701 | -2.901437 |
| 356 | 1 | 0 | -1.762848 | -5.356211 | -3.184768 |
| 357 | 6 | 0 | -2.655231 | 2.396935  | -2.252833 |
| 358 | 1 | 0 | -3.767199 | 2.416232  | -2.368195 |
| 359 | 1 | 0 | -2.244207 | 3.380130  | -2.589502 |
| 360 | 1 | 0 | -2.243493 | 1.595162  | -2.912768 |
| 361 | 6 | 0 | 7.117526  | 5.625067  | -0.258126 |
| 362 | 7 | 0 | 7.557161  | 4.292683  | -0.704123 |
| 363 | 1 | 0 | 8.539515  | 4.168250  | -0.957308 |
| 364 | 6 | 0 | 6.719871  | 3.234841  | -0.725199 |
| 365 | 8 | 0 | 5.536426  | 3.278870  | -0.354600 |
| 366 | 6 | 0 | 7.320986  | 1.930637  | -1.299341 |
| 367 | 7 | 0 | 6.860404  | 0.801557  | -0.478087 |
| 368 | 1 | 0 | 5.854491  | 0.714027  | -0.297408 |
| 369 | 6 | 0 | 7.633907  | 6.668939  | -1.272896 |
| 370 | 8 | 0 | 8.812216  | 6.640195  | -1.665470 |
| 371 | 7 | 0 | 6.728577  | 7.595683  | -1.651030 |
| 372 | 1 | 0 | 5.755284  | 7.504241  | -1.339329 |
| 373 | 6 | 0 | 7.063453  | 8.685453  | -2.581429 |
| 374 | 6 | 0 | 6.665054  | 10.035473 | -1.939762 |
| 375 | 8 | 0 | 5.521382  | 10.215639 | -1.487681 |
| 376 | 7 | 0 | 7.620094  | 10.984195 | -1.936986 |
| 377 | 1 | 0 | 8.569186  | 10.775008 | -2.253541 |
| 378 | 1 | 0 | 6.023510  | 5.620634  | -0.239762 |
| 379 | 1 | 0 | 8.413340  | 1.959568  | -1.241104 |
| 380 | 1 | 0 | 8.145543  | 8.637857  | -2.748282 |
| 381 | 6 | 0 | 7.043480  | -1.214243 | 0.884778  |
| 382 | 7 | 0 | 7.539577  | -2.551091 | 0.520642  |
| 383 | 1 | 0 | 8.548615  | -2.683536 | 0.426538  |
| 384 | 6 | 0 | 6.712613  | -3.612954 | 0.414558  |
| 385 | 8 | 0 | 5.487507  | -3.560531 | 0.604765  |



|     |   |   |          |            |           |
|-----|---|---|----------|------------|-----------|
| 386 | 6 | 0 | 7.390809 | -4.936361  | -0.014869 |
| 387 | 7 | 0 | 6.795613 | -6.043011  | 0.749252  |
| 388 | 1 | 0 | 5.776575 | -6.160059  | 0.722411  |
| 389 | 6 | 0 | 7.539561 | -6.929949  | 1.438059  |
| 390 | 8 | 0 | 8.783195 | -6.921823  | 1.468002  |
| 391 | 6 | 0 | 7.694970 | -0.165289  | -0.044190 |
| 392 | 8 | 0 | 8.907922 | -0.214636  | -0.309281 |
| 393 | 1 | 0 | 5.957860 | -1.218488  | 0.747434  |
| 394 | 1 | 0 | 8.458381 | -4.907760  | 0.224139  |
| 395 | 6 | 0 | 7.371847 | 12.313734  | -1.395505 |
| 396 | 1 | 0 | 8.229524 | 12.946764  | -1.634812 |
| 397 | 1 | 0 | 6.466047 | 12.744983  | -1.834580 |
| 398 | 1 | 0 | 7.238796 | 12.284421  | -0.306705 |
| 399 | 6 | 0 | 6.731489 | -7.960411  | 2.261933  |
| 400 | 1 | 0 | 5.724085 | -8.062118  | 1.846749  |
| 401 | 1 | 0 | 8.358545 | -9.359014  | 2.428929  |
| 402 | 6 | 0 | 6.695676 | -10.392155 | 1.806821  |
| 403 | 6 | 0 | 7.515766 | -11.671041 | 1.745172  |
| 404 | 1 | 0 | 8.550563 | -11.525590 | 2.063729  |
| 405 | 1 | 0 | 7.034222 | -12.423342 | 2.378411  |
| 406 | 1 | 0 | 7.496567 | -12.044979 | 0.715784  |
| 407 | 8 | 0 | 5.484699 | -10.393669 | 1.526647  |
| 408 | 7 | 0 | 7.375579 | -9.276909  | 2.168071  |
| 409 | 6 | 0 | 6.622010 | -7.430222  | 3.672628  |
| 410 | 1 | 0 | 7.630152 | -7.293076  | 4.135642  |
| 411 | 1 | 0 | 6.099402 | -6.442387  | 3.653517  |
| 412 | 1 | 0 | 6.030961 | -8.130843  | 4.311227  |
| 413 | 6 | 0 | 7.233852 | -5.072762  | -1.510576 |
| 414 | 1 | 0 | 6.155665 | -5.097242  | -1.805548 |
| 415 | 1 | 0 | 7.721902 | -4.201185  | -2.011904 |
| 416 | 1 | 0 | 7.721618 | -6.010017  | -1.873563 |
| 417 | 6 | 0 | 7.349565 | -0.814917  | 2.309623  |
| 418 | 1 | 0 | 8.451198 | -0.781815  | 2.495160  |
| 419 | 1 | 0 | 6.923251 | 0.199430   | 2.505859  |
| 420 | 1 | 0 | 6.889448 | -1.537138  | 3.027082  |
| 421 | 6 | 0 | 6.920005 | 1.838774   | -2.752887 |
| 422 | 1 | 0 | 5.807997 | 1.816506   | -2.866788 |
| 423 | 1 | 0 | 7.317698 | 2.727848   | -3.300967 |
| 424 | 1 | 0 | 7.342778 | 0.915828   | -3.219270 |
| 425 | 6 | 0 | 7.626083 | 6.015554   | 1.109068  |
| 426 | 1 | 0 | 8.742634 | 6.053756   | 1.131721  |
| 427 | 1 | 0 | 7.228581 | 7.026407   | 1.372480  |
| 428 | 1 | 0 | 7.278915 | 5.285996   | 1.880587  |

|     |   |   |          |          |           |
|-----|---|---|----------|----------|-----------|
| 429 | 6 | 0 | 6.360362 | 8.583245 | -3.913914 |
| 430 | 1 | 0 | 6.625003 | 7.628319 | -4.429479 |
| 431 | 1 | 0 | 5.249864 | 8.623732 | -3.787257 |
| 432 | 1 | 0 | 6.674828 | 9.437220 | -4.562419 |

AP PI (Ac-AAAAAA-NHMe)<sub>7</sub>

|    |   |   |           |           |           |
|----|---|---|-----------|-----------|-----------|
| 1  | 6 | 0 | 9.499593  | 5.341406  | -2.248136 |
| 2  | 7 | 0 | 9.129118  | 4.236919  | -1.349134 |
| 3  | 1 | 0 | 8.152694  | 4.169111  | -1.047112 |
| 4  | 6 | 0 | 9.995545  | 3.261450  | -1.002825 |
| 5  | 8 | 0 | 11.165126 | 3.182550  | -1.411726 |
| 6  | 6 | 0 | 9.443658  | 2.242037  | 0.021529  |
| 7  | 7 | 0 | 9.904490  | 0.893343  | -0.344373 |
| 8  | 1 | 0 | 10.902670 | 0.756027  | -0.523873 |
| 9  | 6 | 0 | 8.955551  | 6.662239  | -1.653339 |
| 10 | 8 | 0 | 7.801674  | 6.725915  | -1.195903 |
| 11 | 7 | 0 | 9.805921  | 7.707771  | -1.713497 |
| 12 | 1 | 0 | 10.773149 | 7.551142  | -2.017033 |
| 13 | 6 | 0 | 9.432150  | 9.049005  | -1.233292 |
| 14 | 6 | 0 | 9.831550  | 10.090789 | -2.304431 |
| 15 | 8 | 0 | 10.990044 | 10.149662 | -2.747758 |
| 16 | 7 | 0 | 8.842830  | 10.925093 | -2.683839 |
| 17 | 1 | 0 | 7.895659  | 10.775034 | -2.325137 |
| 18 | 1 | 0 | 10.591960 | 5.372666  | -2.304431 |
| 19 | 1 | 0 | 8.346926  | 9.048104  | -1.090745 |
| 20 | 6 | 0 | 14.138988 | -2.281217 | -0.211760 |
| 21 | 6 | 0 | 14.752280 | -3.051347 | 0.982927  |
| 22 | 8 | 0 | 15.870317 | -2.759792 | 1.421084  |
| 23 | 7 | 0 | 13.979085 | -4.066149 | 1.440851  |
| 24 | 1 | 0 | 13.005739 | -4.135861 | 1.132401  |
| 25 | 6 | 0 | 14.417659 | -4.937904 | 2.532555  |
| 26 | 6 | 0 | 13.764962 | -6.325228 | 2.333321  |
| 27 | 8 | 0 | 12.659909 | -6.442652 | 1.785065  |
| 28 | 7 | 0 | 14.470800 | -7.367894 | 2.820516  |
| 29 | 1 | 0 | 15.327273 | -7.212382 | 3.343942  |
| 30 | 7 | 0 | 14.659888 | -0.907863 | -0.166148 |
| 31 | 1 | 0 | 15.615033 | -0.814294 | 0.164863  |
| 32 | 6 | 0 | 13.884301 | 0.182631  | -0.349026 |
| 33 | 8 | 0 | 12.686617 | 0.122384  | -0.663403 |
| 34 | 6 | 0 | 14.581617 | 1.540434  | -0.106762 |
| 35 | 7 | 0 | 13.998501 | 2.524596  | -1.020682 |
| 36 | 1 | 0 | 12.983306 | 2.525460  | -1.146236 |
| 37 | 1 | 0 | 13.049962 | -2.236198 | -0.114448 |
| 38 | 1 | 0 | 15.510574 | -5.016302 | 2.468325  |
| 39 | 1 | 0 | 15.650479 | 1.473914  | -0.346585 |
| 40 | 6 | 0 | 9.723829  | -1.510767 | -0.769997 |
| 41 | 7 | 0 | 9.215840  | -2.583036 | 0.099076  |

|    |   |   |           |            |           |
|----|---|---|-----------|------------|-----------|
| 42 | 1 | 0 | 8.202351  | -2.663353  | 0.224884  |
| 43 | 6 | 0 | 10.023510 | -3.508201  | 0.661167  |
| 44 | 8 | 0 | 11.250744 | -3.566651  | 0.482221  |
| 45 | 6 | 0 | 9.309429  | -4.483081  | 1.628044  |
| 46 | 7 | 0 | 9.842136  | -5.841873  | 1.441441  |
| 47 | 1 | 0 | 10.855506 | -5.971966  | 1.495815  |
| 48 | 6 | 0 | 9.036488  | -6.920741  | 1.345645  |
| 49 | 8 | 0 | 7.795450  | -6.865859  | 1.368227  |
| 50 | 6 | 0 | 9.079575  | -0.173462  | -0.331603 |
| 51 | 8 | 0 | 7.875288  | -0.117599  | -0.030556 |
| 52 | 1 | 0 | 10.809962 | -1.466485  | -0.642630 |
| 53 | 1 | 0 | 8.238798  | -4.517119  | 1.405312  |
| 54 | 6 | 0 | 13.959303 | 4.435930   | -2.534630 |
| 55 | 6 | 0 | 14.733718 | 3.544733   | -1.534307 |
| 56 | 8 | 0 | 15.926438 | 3.747194   | -1.287495 |
| 57 | 7 | 0 | 14.475228 | 5.805947   | -2.414520 |
| 58 | 1 | 0 | 15.479817 | 5.900117   | -2.314744 |
| 59 | 6 | 0 | 13.675412 | 6.893098   | -2.339030 |
| 60 | 8 | 0 | 12.439211 | 6.829397   | -2.422758 |
| 61 | 6 | 0 | 14.397881 | 8.240746   | -2.102713 |
| 62 | 7 | 0 | 13.794791 | 9.279555   | -2.935055 |
| 63 | 1 | 0 | 12.809958 | 9.511690   | -2.799269 |
| 64 | 6 | 0 | 14.492859 | 9.845640   | -3.966829 |
| 65 | 8 | 0 | 15.665903 | 9.563839   | -4.228578 |
| 66 | 1 | 0 | 12.895064 | 4.458589   | -2.280981 |
| 67 | 1 | 0 | 15.444284 | 8.171452   | -2.426552 |
| 68 | 6 | 0 | 13.710760 | 10.870787  | -4.778189 |
| 69 | 1 | 0 | 12.675173 | 10.975895  | -4.443981 |
| 70 | 1 | 0 | 14.224201 | 11.835462  | -4.703722 |
| 71 | 1 | 0 | 13.733363 | 10.568197  | -5.830149 |
| 72 | 6 | 0 | 9.064653  | 11.977342  | -3.664304 |
| 73 | 1 | 0 | 10.039255 | 12.445107  | -3.497240 |
| 74 | 1 | 0 | 9.048536  | 11.586209  | -4.690387 |
| 75 | 1 | 0 | 8.277715  | 12.730010  | -3.561069 |
| 76 | 6 | 0 | 13.934348 | -8.734758  | 2.896181  |
| 77 | 1 | 0 | 12.854571 | -8.685049  | 2.726451  |
| 78 | 6 | 0 | 9.766174  | -8.273746  | 1.153486  |
| 79 | 1 | 0 | 10.790900 | -8.203156  | 1.532175  |
| 80 | 1 | 0 | 8.091793  | -9.488253  | 1.755033  |
| 81 | 6 | 0 | 9.713702  | -10.046948 | 2.882547  |
| 82 | 6 | 0 | 8.848202  | -11.060164 | 3.614368  |
| 83 | 1 | 0 | 7.823064  | -11.088874 | 3.238750  |
| 84 | 1 | 0 | 9.311203  | -12.047433 | 3.513238  |

|     |   |   |           |            |           |
|-----|---|---|-----------|------------|-----------|
| 85  | 1 | 0 | 8.845293  | -10.805409 | 4.679853  |
| 86  | 8 | 0 | 10.920726 | -9.917181  | 3.160414  |
| 87  | 7 | 0 | 9.082689  | -9.310696  | 1.937966  |
| 88  | 6 | 0 | 14.234409 | -9.267600  | 4.318969  |
| 89  | 1 | 0 | 12.426040 | -10.217622 | 4.272247  |
| 90  | 6 | 0 | 13.424330 | -10.761882 | 6.095855  |
| 91  | 1 | 0 | 13.213005 | -11.835028 | 6.020130  |
| 92  | 1 | 0 | 14.445160 | -10.619124 | 6.456509  |
| 93  | 1 | 0 | 12.731111 | -10.318740 | 6.823338  |
| 94  | 8 | 0 | 15.262884 | -8.926614  | 4.914870  |
| 95  | 7 | 0 | 13.302704 | -10.129054 | 4.792104  |
| 96  | 6 | 0 | 14.537737 | -9.687023  | 1.892772  |
| 97  | 1 | 0 | 14.368307 | -9.321404  | 0.850745  |
| 98  | 1 | 0 | 15.637016 | -9.806801  | 2.052291  |
| 99  | 1 | 0 | 14.048996 | -10.686318 | 2.002010  |
| 100 | 6 | 0 | 9.816025  | -8.563249  | -0.327979 |
| 101 | 1 | 0 | 8.788599  | -8.637343  | -0.762475 |
| 102 | 1 | 0 | 10.364205 | -7.737686  | -0.844895 |
| 103 | 1 | 0 | 10.353420 | -9.522869  | -0.523766 |
| 104 | 6 | 0 | 9.494890  | -3.946410  | 3.028979  |
| 105 | 1 | 0 | 10.577591 | -3.884108  | 3.300641  |
| 106 | 1 | 0 | 9.050737  | -2.922833  | 3.092144  |
| 107 | 1 | 0 | 8.979722  | -4.602386  | 3.772194  |
| 108 | 6 | 0 | 14.066017 | -4.443258  | 3.917295  |
| 109 | 1 | 0 | 14.531664 | -3.443178  | 4.098612  |
| 110 | 1 | 0 | 12.960082 | -4.348112  | 4.047831  |
| 111 | 1 | 0 | 14.455718 | -5.158520  | 4.682185  |
| 112 | 6 | 0 | 14.474622 | -3.025056  | -1.481853 |
| 113 | 1 | 0 | 14.077111 | -2.479732  | -2.372482 |
| 114 | 1 | 0 | 15.577999 | -3.148382  | -1.605530 |
| 115 | 1 | 0 | 14.001710 | -4.037397  | -1.446747 |
| 116 | 6 | 0 | 9.421520  | -1.710934  | -2.236358 |
| 117 | 1 | 0 | 8.320014  | -1.751354  | -2.422738 |
| 118 | 1 | 0 | 9.852043  | -0.860119  | -2.819428 |
| 119 | 1 | 0 | 9.879024  | -2.661163  | -2.604992 |
| 120 | 6 | 0 | 14.451507 | 1.881428   | 1.360350  |
| 121 | 1 | 0 | 14.964556 | 2.850321   | 1.578310  |
| 122 | 1 | 0 | 13.379734 | 1.971967   | 1.664311  |
| 123 | 1 | 0 | 14.930864 | 1.080598   | 1.974616  |
| 124 | 6 | 0 | 9.891268  | 2.687131   | 1.394689  |
| 125 | 1 | 0 | 11.006343 | 2.717471   | 1.469208  |
| 126 | 1 | 0 | 9.491503  | 3.710989   | 1.597060  |
| 127 | 1 | 0 | 9.501667  | 1.993306   | 2.178806  |

|     |   |   |           |           |           |
|-----|---|---|-----------|-----------|-----------|
| 128 | 6 | 0 | 14.114087 | 3.839715  | -3.913367 |
| 129 | 1 | 0 | 15.189299 | 3.761436  | -4.206775 |
| 130 | 1 | 0 | 13.665079 | 2.816197  | -3.920922 |
| 131 | 1 | 0 | 13.584160 | 4.464905  | -4.672826 |
| 132 | 6 | 0 | 8.948530  | 5.206045  | -3.648164 |
| 133 | 1 | 0 | 7.830866  | 5.182249  | -3.644496 |
| 134 | 1 | 0 | 9.285443  | 6.077985  | -4.260805 |
| 135 | 1 | 0 | 9.322933  | 4.269385  | -4.128287 |
| 136 | 6 | 0 | 14.357805 | 8.531047  | -0.621274 |
| 137 | 1 | 0 | 13.305665 | 8.621034  | -0.254173 |
| 138 | 1 | 0 | 14.859182 | 7.700118  | -0.067432 |
| 139 | 1 | 0 | 14.894023 | 9.484559  | -0.394236 |
| 140 | 6 | 0 | 10.098529 | 9.439702  | 0.064252  |
| 141 | 1 | 0 | 9.838878  | 8.717402  | 0.875695  |
| 142 | 1 | 0 | 11.210877 | 9.468703  | -0.046273 |
| 143 | 1 | 0 | 9.745471  | 10.455914 | 0.366470  |
| 144 | 6 | 0 | -0.008917 | 5.572394  | -0.821811 |
| 145 | 7 | 0 | -0.408081 | 4.325843  | -0.150858 |
| 146 | 1 | 0 | -1.394383 | 4.200247  | 0.095793  |
| 147 | 6 | 0 | 0.460255  | 3.316011  | 0.062908  |
| 148 | 8 | 0 | 1.649168  | 3.330845  | -0.294623 |
| 149 | 6 | 0 | -0.116406 | 2.113813  | 0.846492  |
| 150 | 7 | 0 | 0.339648  | 0.871774  | 0.204811  |
| 151 | 1 | 0 | 1.345588  | 0.745422  | 0.050894  |
| 152 | 6 | 0 | -0.530676 | 6.766289  | 0.009789  |
| 153 | 8 | 0 | -1.700242 | 6.787953  | 0.429730  |
| 154 | 7 | 0 | 0.361869  | 7.759670  | 0.197819  |
| 155 | 1 | 0 | 1.332534  | 7.625494  | -0.105415 |
| 156 | 6 | 0 | 0.018909  | 8.994011  | 0.921965  |
| 157 | 6 | 0 | 0.404866  | 10.208550 | 0.046605  |
| 158 | 8 | 0 | 1.551608  | 10.332781 | -0.417351 |
| 159 | 7 | 0 | -0.577229 | 11.110801 | -0.143625 |
| 160 | 1 | 0 | -1.519638 | 10.909111 | 0.203296  |
| 161 | 1 | 0 | 1.084675  | 5.587703  | -0.861981 |
| 162 | 1 | 0 | -1.209774 | 2.123759  | 0.804767  |
| 163 | 1 | 0 | -1.062890 | 8.977317  | 1.089166  |
| 164 | 6 | 0 | 4.651090  | -2.203213 | -0.691666 |
| 165 | 6 | 0 | 5.249967  | -3.306496 | 0.211841  |
| 166 | 8 | 0 | 6.451981  | -3.290715 | 0.523537  |
| 167 | 7 | 0 | 4.382927  | -4.271100 | 0.582852  |
| 168 | 1 | 0 | 3.389687  | -4.168596 | 0.353001  |
| 169 | 6 | 0 | 4.794854  | -5.426075 | 1.394278  |
| 170 | 6 | 0 | 4.263892  | -6.715230 | 0.725520  |

|     |   |   |           |           |           |
|-----|---|---|-----------|-----------|-----------|
| 171 | 8 | 0 | 3.091512  | -6.789117 | 0.320707  |
| 172 | 7 | 0 | 5.154255  | -7.726790 | 0.659015  |
| 173 | 1 | 0 | 6.124975  | -7.558962 | 0.943392  |
| 174 | 7 | 0 | 5.126536  | -0.895312 | -0.215950 |
| 175 | 1 | 0 | 6.136820  | -0.754199 | -0.114457 |
| 176 | 6 | 0 | 4.290092  | 0.139765  | -0.000310 |
| 177 | 8 | 0 | 3.063448  | 0.097743  | -0.196262 |
| 178 | 6 | 0 | 4.959951  | 1.410697  | 0.571065  |
| 179 | 7 | 0 | 4.421093  | 2.586857  | -0.127745 |
| 180 | 1 | 0 | 3.404133  | 2.698373  | -0.179233 |
| 181 | 1 | 0 | 3.559535  | -2.203455 | -0.616094 |
| 182 | 1 | 0 | 5.888896  | -5.435797 | 1.420133  |
| 183 | 1 | 0 | 6.038383  | 1.384349  | 0.386672  |
| 184 | 6 | 0 | 0.141927  | -1.324614 | -0.844013 |
| 185 | 7 | 0 | -0.363569 | -2.573650 | -0.254368 |
| 186 | 1 | 0 | -1.377211 | -2.698908 | -0.177153 |
| 187 | 6 | 0 | 0.455719  | -3.589556 | 0.086889  |
| 188 | 8 | 0 | 1.686750  | -3.575205 | -0.074238 |
| 189 | 6 | 0 | -0.243237 | -4.794324 | 0.760198  |
| 190 | 7 | 0 | 0.314841  | -6.040262 | 0.212672  |
| 191 | 1 | 0 | 1.330978  | -6.173277 | 0.245818  |
| 192 | 6 | 0 | -0.468183 | -7.040295 | -0.239993 |
| 193 | 8 | 0 | -1.711237 | -7.010260 | -0.231616 |
| 194 | 6 | 0 | -0.505941 | -0.129901 | -0.107020 |
| 195 | 8 | 0 | -1.726243 | -0.113560 | 0.130441  |
| 196 | 1 | 0 | 1.227200  | -1.310542 | -0.704767 |
| 197 | 1 | 0 | -1.313084 | -4.785512 | 0.530998  |
| 198 | 6 | 0 | 4.482350  | 4.690733  | -1.370551 |
| 199 | 6 | 0 | 5.218571  | 3.567187  | -0.603252 |
| 200 | 8 | 0 | 6.454730  | 3.575157  | -0.488238 |
| 201 | 7 | 0 | 5.030492  | 5.992222  | -0.958512 |
| 202 | 1 | 0 | 6.044398  | 6.132099  | -1.020008 |
| 203 | 6 | 0 | 4.238255  | 7.029409  | -0.617185 |
| 204 | 8 | 0 | 2.995647  | 6.987607  | -0.618318 |
| 205 | 6 | 0 | 4.989331  | 8.302159  | -0.159445 |
| 206 | 7 | 0 | 4.346279  | 9.483427  | -0.750754 |
| 207 | 1 | 0 | 3.344631  | 9.625078  | -0.597848 |
| 208 | 6 | 0 | 5.043998  | 10.418895 | -1.436185 |
| 209 | 8 | 0 | 6.273266  | 10.355278 | -1.620877 |
| 210 | 1 | 0 | 3.418431  | 4.687356  | -1.114921 |
| 211 | 1 | 0 | 6.021767  | 8.279350  | -0.522661 |
| 212 | 6 | 0 | 4.227248  | 11.572370 | -1.996112 |
| 213 | 1 | 0 | 3.171929  | 11.514103 | -1.720667 |

|     |   |   |           |            |           |
|-----|---|---|-----------|------------|-----------|
| 214 | 1 | 0 | 4.656970  | 12.510824  | -1.630082 |
| 215 | 1 | 0 | 4.326638  | 11.567599  | -3.087087 |
| 216 | 6 | 0 | -0.361707 | 12.321784  | -0.921746 |
| 217 | 1 | 0 | -1.169858 | 13.026588  | -0.707703 |
| 218 | 1 | 0 | 0.596568  | 12.777071  | -0.653627 |
| 219 | 1 | 0 | -0.347880 | 12.114158  | -1.999836 |
| 220 | 6 | 0 | 4.803236  | -9.044581  | 0.105998  |
| 221 | 1 | 0 | 3.723471  | -9.037294  | -0.074871 |
| 222 | 6 | 0 | 0.292507  | -8.248899  | -0.834671 |
| 223 | 1 | 0 | 1.325570  | -8.257165  | -0.472820 |
| 224 | 1 | 0 | -1.341871 | -9.621338  | -0.530503 |
| 225 | 6 | 0 | 0.367327  | -10.488614 | 0.210199  |
| 226 | 6 | 0 | -0.440855 | -11.697984 | 0.652278  |
| 227 | 1 | 0 | -1.495718 | -11.622842 | 0.378718  |
| 228 | 1 | 0 | -0.000690 | -12.593242 | 0.200740  |
| 229 | 1 | 0 | -0.347583 | -11.796645 | 1.739403  |
| 230 | 8 | 0 | 1.597102  | -10.436833 | 0.395354  |
| 231 | 7 | 0 | -0.339439 | -9.492242  | -0.372573 |
| 232 | 6 | 0 | 5.164471  | -10.132902 | 1.143110  |
| 233 | 1 | 0 | 3.231649  | -10.826826 | 1.067408  |
| 234 | 6 | 0 | 4.362029  | -12.076302 | 2.393957  |
| 235 | 1 | 0 | 3.518545  | -12.766864 | 2.310065  |
| 236 | 1 | 0 | 5.291074  | -12.611534 | 2.173457  |
| 237 | 1 | 0 | 4.420314  | -11.710082 | 3.427287  |
| 238 | 8 | 0 | 6.306211  | -10.207532 | 1.630316  |
| 239 | 7 | 0 | 4.168695  | -10.986151 | 1.449219  |
| 240 | 6 | 0 | 5.518970  | -9.373327  | -1.181928 |
| 241 | 1 | 0 | 5.283331  | -8.617451  | -1.969832 |
| 242 | 1 | 0 | 6.626945  | -9.399209  | -1.032376 |
| 243 | 1 | 0 | 5.185571  | -10.377511 | -1.541230 |
| 244 | 6 | 0 | 0.304540  | -8.087857  | -2.336729 |
| 245 | 1 | 0 | -0.733498 | -8.062909  | -2.750980 |
| 246 | 1 | 0 | 0.816989  | -7.129795  | -2.598639 |
| 247 | 1 | 0 | 0.858858  | -8.929681  | -2.818292 |
| 248 | 6 | 0 | -0.065147 | -4.651200  | 2.253510  |
| 249 | 1 | 0 | 1.017005  | -4.644117  | 2.534471  |
| 250 | 1 | 0 | -0.527209 | -3.690079  | 2.587752  |
| 251 | 1 | 0 | -0.566155 | -5.492152  | 2.791778  |
| 252 | 6 | 0 | 4.275235  | -5.395429  | 2.812272  |
| 253 | 1 | 0 | 4.640579  | -4.484178  | 3.345226  |
| 254 | 1 | 0 | 3.157489  | -5.397195  | 2.835219  |
| 255 | 1 | 0 | 4.644921  | -6.298023  | 3.357865  |
| 256 | 6 | 0 | 5.040921  | -2.514235  | -2.117426 |



|     |   |   |            |           |           |
|-----|---|---|------------|-----------|-----------|
| 257 | 1 | 0 | 4.620680   | -1.750222 | -2.815689 |
| 258 | 1 | 0 | 6.152182   | -2.534286 | -2.239201 |
| 259 | 1 | 0 | 4.632731   | -3.515711 | -2.399119 |
| 260 | 6 | 0 | -0.160913  | -1.175472 | -2.316473 |
| 261 | 1 | 0 | -1.262671  | -1.173581 | -2.506271 |
| 262 | 1 | 0 | 0.266358   | -0.210002 | -2.682975 |
| 263 | 1 | 0 | 0.298898   | -2.010674 | -2.898658 |
| 264 | 6 | 0 | 4.724433   | 1.421842  | 2.063429  |
| 265 | 1 | 0 | 5.205210   | 2.315860  | 2.529881  |
| 266 | 1 | 0 | 3.632355   | 1.440194  | 2.302028  |
| 267 | 1 | 0 | 5.173100   | 0.502325  | 2.512983  |
| 268 | 6 | 0 | 0.317931   | 2.252619  | 2.286553  |
| 269 | 1 | 0 | 1.432458   | 2.254227  | 2.376019  |
| 270 | 1 | 0 | -0.074740  | 3.215038  | 2.697015  |
| 271 | 1 | 0 | -0.086637  | 1.412716  | 2.901990  |
| 272 | 6 | 0 | 4.628503   | 4.406763  | -2.847252 |
| 273 | 1 | 0 | 5.703806   | 4.392671  | -3.153306 |
| 274 | 1 | 0 | 4.178880   | 3.409540  | -3.075779 |
| 275 | 1 | 0 | 4.097570   | 5.182418  | -3.450929 |
| 276 | 6 | 0 | -0.550199  | 5.715033  | -2.224647 |
| 277 | 1 | 0 | -1.668173  | 5.716183  | -2.230227 |
| 278 | 1 | 0 | -0.190171  | 6.679214  | -2.660294 |
| 279 | 1 | 0 | -0.191809  | 4.877605  | -2.871297 |
| 280 | 6 | 0 | 5.004899   | 8.304535  | 1.351340  |
| 281 | 1 | 0 | 3.967594   | 8.319526  | 1.768045  |
| 282 | 1 | 0 | 5.522620   | 7.383039  | 1.714379  |
| 283 | 1 | 0 | 5.555597   | 9.196320  | 1.737699  |
| 284 | 6 | 0 | 0.723319   | 9.134796  | 2.249918  |
| 285 | 1 | 0 | 0.466867   | 8.283434  | 2.925983  |
| 286 | 1 | 0 | 1.833347   | 9.162778  | 2.116754  |
| 287 | 1 | 0 | 0.399968   | 10.086491 | 2.738113  |
| 288 | 1 | 0 | 8.349857   | 2.235186  | -0.004201 |
| 289 | 6 | 0 | -9.492633  | 5.614564  | 0.547057  |
| 290 | 7 | 0 | -9.934185  | 4.264772  | 0.934810  |
| 291 | 1 | 0 | -10.915683 | 4.131811  | 1.186819  |
| 292 | 6 | 0 | -9.100300  | 3.204442  | 0.902133  |
| 293 | 8 | 0 | -7.918894  | 3.262040  | 0.527012  |
| 294 | 6 | 0 | -9.702209  | 1.877074  | 1.419875  |
| 295 | 7 | 0 | -9.250514  | 0.785513  | 0.544498  |
| 296 | 1 | 0 | -8.246464  | 0.707669  | 0.349739  |
| 297 | 6 | 0 | -10.011140 | 6.614682  | 1.603810  |
| 298 | 8 | 0 | -11.188676 | 6.565894  | 1.996800  |
| 299 | 7 | 0 | -9.108674  | 7.529418  | 2.016544  |

|     |   |   |            |           |           |
|-----|---|---|------------|-----------|-----------|
| 300 | 1 | 0 | -8.134977  | 7.452784  | 1.701976  |
| 301 | 6 | 0 | -9.445880  | 8.579738  | 2.990549  |
| 302 | 6 | 0 | -9.039084  | 9.954297  | 2.409284  |
| 303 | 8 | 0 | -7.891494  | 10.150013 | 1.974208  |
| 304 | 7 | 0 | -9.991863  | 10.904891 | 2.439342  |
| 305 | 1 | 0 | -10.943749 | 10.684776 | 2.739597  |
| 306 | 1 | 0 | -8.398574  | 5.610715  | 0.531493  |
| 307 | 1 | 0 | -10.529079 | 8.528867  | 3.148804  |
| 308 | 6 | 0 | -4.928325  | -2.027292 | -1.027100 |
| 309 | 6 | 0 | -4.316620  | -3.303230 | -0.402848 |
| 310 | 8 | 0 | -3.118351  | -3.344870 | -0.082206 |
| 311 | 7 | 0 | -5.167722  | -4.343649 | -0.283084 |
| 312 | 1 | 0 | -6.161764  | -4.203618 | -0.485053 |
| 313 | 6 | 0 | -4.733955  | -5.654369 | 0.224780  |
| 314 | 6 | 0 | -5.252158  | -6.748469 | -0.735844 |
| 315 | 8 | 0 | -6.434154  | -6.747934 | -1.122259 |
| 316 | 7 | 0 | -4.343865  | -7.684113 | -1.076702 |
| 317 | 1 | 0 | -3.368937  | -7.570538 | -0.777595 |
| 318 | 7 | 0 | -4.456969  | -0.858900 | -0.269631 |
| 319 | 1 | 0 | -3.446801  | -0.741669 | -0.135682 |
| 320 | 6 | 0 | -5.296574  | 0.099385  | 0.171228  |
| 321 | 8 | 0 | -6.523211  | 0.100379  | -0.032039 |
| 322 | 6 | 0 | -4.630140  | 1.210645  | 1.014172  |
| 323 | 7 | 0 | -5.143323  | 2.515393  | 0.569283  |
| 324 | 1 | 0 | -6.157697  | 2.645414  | 0.518982  |
| 325 | 1 | 0 | -6.019335  | -2.052768 | -0.947680 |
| 326 | 1 | 0 | -3.639688  | -5.652792 | 0.241861  |
| 327 | 1 | 0 | -3.548000  | 1.210450  | 0.851586  |
| 328 | 6 | 0 | -9.445366  | -1.170217 | -0.901088 |
| 329 | 7 | 0 | -9.937538  | -2.523122 | -0.594820 |
| 330 | 1 | 0 | -10.945573 | -2.660589 | -0.496474 |
| 331 | 6 | 0 | -9.109864  | -3.588691 | -0.552614 |
| 332 | 8 | 0 | -7.886956  | -3.526130 | -0.754656 |
| 333 | 6 | 0 | -9.781399  | -4.933534 | -0.183392 |
| 334 | 7 | 0 | -9.194671  | -5.998074 | -1.011611 |
| 335 | 1 | 0 | -8.175381  | -6.114624 | -1.004424 |
| 336 | 6 | 0 | -9.946166  | -6.848919 | -1.736935 |
| 337 | 8 | 0 | -11.189982 | -6.841145 | -1.750818 |
| 338 | 6 | 0 | -10.087996 | -0.164812 | 0.080901  |
| 339 | 8 | 0 | -11.297300 | -0.229643 | 0.358906  |
| 340 | 1 | 0 | -8.358553  | -1.179659 | -0.774096 |
| 341 | 1 | 0 | -10.852045 | -4.894668 | -0.406643 |
| 342 | 6 | 0 | -5.036452  | 4.839859  | -0.180009 |

|     |   |   |            |            |           |
|-----|---|---|------------|------------|-----------|
| 343 | 6 | 0 | -4.328541  | 3.567599   | 0.343347  |
| 344 | 8 | 0 | -3.096525  | 3.538083   | 0.492468  |
| 345 | 7 | 0 | -4.468320  | 6.017372   | 0.493379  |
| 346 | 1 | 0 | -3.452821  | 6.155212   | 0.457577  |
| 347 | 6 | 0 | -5.242456  | 6.961297   | 1.066547  |
| 348 | 8 | 0 | -6.485605  | 6.930928   | 1.075147  |
| 349 | 6 | 0 | -4.469963  | 8.096003   | 1.779745  |
| 350 | 7 | 0 | -5.097404  | 9.384777   | 1.457605  |
| 351 | 1 | 0 | -6.097866  | 9.500335   | 1.636296  |
| 352 | 6 | 0 | -4.385671  | 10.441328  | 0.999676  |
| 353 | 8 | 0 | -3.155251  | 10.408300  | 0.814458  |
| 354 | 1 | 0 | -6.102455  | 4.804935   | 0.064630  |
| 355 | 1 | 0 | -3.439524  | 8.136706   | 1.412833  |
| 356 | 6 | 0 | -5.189888  | 11.695650  | 0.698076  |
| 357 | 1 | 0 | -6.242528  | 11.597495  | 0.972960  |
| 358 | 1 | 0 | -4.739180  | 12.535089  | 1.237574  |
| 359 | 1 | 0 | -5.107305  | 11.909256  | -0.373375 |
| 360 | 6 | 0 | -9.736231  | 12.255916  | 1.957818  |
| 361 | 1 | 0 | -8.829965  | 12.663124  | 2.418266  |
| 362 | 1 | 0 | -9.599960  | 12.274538  | 0.869173  |
| 363 | 1 | 0 | -10.591836 | 12.881648  | 2.222457  |
| 364 | 6 | 0 | -4.679331  | -8.824194  | -1.944433 |
| 365 | 1 | 0 | -5.760076  | -8.788530  | -2.115406 |
| 366 | 6 | 0 | -9.147772  | -7.833794  | -2.623647 |
| 367 | 1 | 0 | -8.134084  | -7.953362  | -2.229102 |
| 368 | 1 | 0 | -10.774188 | -9.226707  | -2.837533 |
| 369 | 6 | 0 | -9.099638  | -10.285866 | -2.295291 |
| 370 | 6 | 0 | -9.916484  | -11.568272 | -2.285504 |
| 371 | 1 | 0 | -10.955130 | -11.410203 | -2.584913 |
| 372 | 1 | 0 | -9.440702  | -12.288505 | -2.959038 |
| 373 | 1 | 0 | -9.885159  | -11.990494 | -1.275220 |
| 374 | 8 | 0 | -7.884128  | -10.298587 | -2.035343 |
| 375 | 7 | 0 | -9.787607  | -9.155319  | -2.587129 |
| 376 | 6 | 0 | -4.296113  | -10.135123 | -1.218446 |
| 377 | 1 | 0 | -6.218325  | -10.814083 | -1.470123 |
| 378 | 6 | 0 | -5.069591  | -12.347100 | -0.508059 |
| 379 | 1 | 0 | -5.057879  | -12.265856 | 0.586751  |
| 380 | 1 | 0 | -5.879192  | -13.019552 | -0.804424 |
| 381 | 1 | 0 | -4.111919  | -12.770885 | -0.825319 |
| 382 | 8 | 0 | -3.151538  | -10.314210 | -0.768380 |
| 383 | 7 | 0 | -5.279963  | -11.052681 | -1.140018 |
| 384 | 6 | 0 | -3.966230  | -8.803511  | -3.274791 |
| 385 | 1 | 0 | -4.218559  | -7.876931  | -3.845247 |

|     |   |   |            |           |           |
|-----|---|---|------------|-----------|-----------|
| 386 | 1 | 0 | -2.857049  | -8.847242 | -3.138312 |
| 387 | 1 | 0 | -4.285159  | -9.689619 | -3.876242 |
| 388 | 6 | 0 | -9.060478  | -7.232464 | -4.007095 |
| 389 | 1 | 0 | -10.075697 | -7.074776 | -4.447551 |
| 390 | 1 | 0 | -8.539651  | -6.245420 | -3.945614 |
| 391 | 1 | 0 | -8.477605  | -7.898141 | -4.689109 |
| 392 | 6 | 0 | -9.604602  | -5.147394 | 1.300968  |
| 393 | 1 | 0 | -8.522589  | -5.186167 | 1.579993  |
| 394 | 1 | 0 | -10.086160 | -4.303503 | 1.853354  |
| 395 | 1 | 0 | -10.087295 | -6.102709 | 1.621124  |
| 396 | 6 | 0 | -5.242962  | -5.975747 | 1.609837  |
| 397 | 1 | 0 | -4.885987  | -5.215287 | 2.346179  |
| 398 | 1 | 0 | -6.360400  | -6.000003 | 1.636098  |
| 399 | 1 | 0 | -4.857037  | -6.978008 | 1.919044  |
| 400 | 6 | 0 | -4.548151  | -2.003540 | -2.488946 |
| 401 | 1 | 0 | -4.979892  | -1.104718 | -2.992602 |
| 402 | 1 | 0 | -3.437868  | -1.985026 | -2.619510 |
| 403 | 1 | 0 | -4.951357  | -2.918474 | -2.988100 |
| 404 | 6 | 0 | -9.764430  | -0.706179 | -2.303320 |
| 405 | 1 | 0 | -10.867690 | -0.665259 | -2.477225 |
| 406 | 1 | 0 | -9.340097  | 0.316356  | -2.456755 |
| 407 | 1 | 0 | -9.310696  | -1.394463 | -3.057285 |
| 408 | 6 | 0 | -4.902507  | 0.907991  | 2.469107  |
| 409 | 1 | 0 | -4.427471  | 1.676951  | 3.125629  |
| 410 | 1 | 0 | -6.000019  | 0.887684  | 2.681093  |
| 411 | 1 | 0 | -4.471037  | -0.091089 | 2.723300  |
| 412 | 6 | 0 | -9.291385  | 1.717479  | 2.864836  |
| 413 | 1 | 0 | -8.178686  | 1.685864  | 2.969525  |
| 414 | 1 | 0 | -9.681578  | 2.582072  | 3.455787  |
| 415 | 1 | 0 | -9.714653  | 0.775793  | 3.291621  |
| 416 | 6 | 0 | -4.884126  | 4.863291  | -1.682831 |
| 417 | 1 | 0 | -3.806965  | 4.890318  | -1.981313 |
| 418 | 1 | 0 | -5.351324  | 3.944070  | -2.113734 |
| 419 | 1 | 0 | -5.394728  | 5.757582  | -2.115884 |
| 420 | 6 | 0 | -9.996713  | 6.063404  | -0.803845 |
| 421 | 1 | 0 | -11.113126 | 6.103556  | -0.828385 |
| 422 | 1 | 0 | -9.597518  | 7.084158  | -1.022797 |
| 423 | 1 | 0 | -9.647658  | 5.366976  | -1.604588 |
| 424 | 6 | 0 | -4.448973  | 7.775795  | 3.256184  |
| 425 | 1 | 0 | -5.484401  | 7.716128  | 3.673533  |
| 426 | 1 | 0 | -3.943802  | 6.791012  | 3.411025  |
| 427 | 1 | 0 | -3.883411  | 8.556956  | 3.819907  |
| 428 | 6 | 0 | -8.751370  | 8.418569  | 4.321773  |

|     |   |   |            |           |           |
|-----|---|---|------------|-----------|-----------|
| 429 | 1 | 0 | -9.022702  | 7.443737  | 4.794846  |
| 430 | 1 | 0 | -7.639975  | 8.460058  | 4.203574  |
| 431 | 1 | 0 | -9.066705  | 9.245566  | 5.003936  |
| 432 | 6 | 0 | -14.728546 | -1.870325 | -0.922996 |
| 433 | 6 | 0 | -13.982880 | -3.213953 | -0.752127 |
| 434 | 8 | 0 | -12.779378 | -3.252324 | -0.465437 |
| 435 | 7 | 0 | -14.734686 | -4.318806 | -0.966989 |
| 436 | 1 | 0 | -15.698209 | -4.229632 | -1.271939 |
| 437 | 6 | 0 | -14.170472 | -5.675724 | -1.006901 |
| 438 | 6 | 0 | -14.671314 | -6.360448 | -2.301509 |
| 439 | 8 | 0 | -15.812353 | -6.157677 | -2.729372 |
| 440 | 7 | 0 | -13.764270 | -7.200451 | -2.862926 |
| 441 | 1 | 0 | -12.801503 | -7.207134 | -2.509242 |
| 442 | 7 | 0 | -14.111378 | -0.884818 | -0.033461 |
| 443 | 1 | 0 | -13.092143 | -0.887792 | 0.061731  |
| 444 | 6 | 0 | -14.827364 | 0.129302  | 0.512371  |
| 445 | 8 | 0 | -16.031618 | 0.328140  | 0.319509  |
| 446 | 6 | 0 | -14.013844 | 1.030091  | 1.473496  |
| 447 | 7 | 0 | -14.651788 | 2.352811  | 1.484993  |
| 448 | 1 | 0 | -15.658748 | 2.349876  | 1.351551  |
| 449 | 1 | 0 | -15.777129 | -1.972382 | -0.614656 |
| 450 | 1 | 0 | -13.080657 | -5.581131 | -1.023265 |
| 451 | 1 | 0 | -12.990944 | 1.144346  | 1.103146  |
| 452 | 6 | 0 | -14.812393 | 4.787150  | 1.319107  |
| 453 | 6 | 0 | -13.954105 | 3.509706  | 1.463457  |
| 454 | 8 | 0 | -12.718608 | 3.564772  | 1.529729  |
| 455 | 7 | 0 | -14.061027 | 5.914348  | 1.877584  |
| 456 | 1 | 0 | -13.038071 | 5.882292  | 1.853735  |
| 457 | 6 | 0 | -14.690179 | 7.037362  | 2.296804  |
| 458 | 8 | 0 | -15.915030 | 7.207380  | 2.256553  |
| 459 | 6 | 0 | -13.753032 | 8.130025  | 2.870058  |
| 460 | 7 | 0 | -14.542228 | 9.362502  | 2.940259  |
| 461 | 1 | 0 | -15.546779 | 9.225400  | 2.871978  |
| 462 | 6 | 0 | -13.985535 | 10.589398 | 3.028465  |
| 463 | 8 | 0 | -12.756875 | 10.769944 | 3.080770  |
| 464 | 1 | 0 | -15.736667 | 4.682667  | 1.903299  |
| 465 | 1 | 0 | -12.914619 | 8.282117  | 2.180835  |
| 466 | 6 | 0 | -14.949833 | 11.764737 | 3.054553  |
| 467 | 1 | 0 | -15.999847 | 11.464293 | 2.990321  |
| 468 | 1 | 0 | -14.792282 | 12.326620 | 3.980780  |
| 469 | 1 | 0 | -14.713562 | 12.431185 | 2.218928  |
| 470 | 6 | 0 | -14.068486 | -7.965222 | -4.076025 |
| 471 | 1 | 0 | -15.139795 | -7.822477 | -4.264338 |

|     |   |   |            |            |           |
|-----|---|---|------------|------------|-----------|
| 472 | 6 | 0 | -13.735197 | -9.451790  | -3.812757 |
| 473 | 1 | 0 | -15.661702 | -9.940360  | -4.264141 |
| 474 | 6 | 0 | -14.632793 | -11.762332 | -3.842789 |
| 475 | 1 | 0 | -15.139950 | -12.294236 | -4.654383 |
| 476 | 1 | 0 | -13.572395 | -12.021308 | -3.849391 |
| 477 | 1 | 0 | -15.064689 | -12.075770 | -2.883987 |
| 478 | 8 | 0 | -12.610726 | -9.807383  | -3.440094 |
| 479 | 7 | 0 | -14.753564 | -10.322851 | -4.037918 |
| 480 | 6 | 0 | -13.297523 | -7.526587  | -5.297881 |
| 481 | 1 | 0 | -13.513698 | -6.457021  | -5.537349 |
| 482 | 1 | 0 | -12.196011 | -7.641356  | -5.141505 |
| 483 | 1 | 0 | -13.598806 | -8.154729  | -6.171387 |
| 484 | 6 | 0 | -14.564010 | -6.539282  | 0.166610  |
| 485 | 1 | 0 | -14.240274 | -6.069423  | 1.127258  |
| 486 | 1 | 0 | -15.669165 | -6.698887  | 0.204803  |
| 487 | 1 | 0 | -14.061023 | -7.533041  | 0.071154  |
| 488 | 6 | 0 | -14.707561 | -1.501634  | -2.389068 |
| 489 | 1 | 0 | -15.248100 | -0.536554  | -2.551390 |
| 490 | 1 | 0 | -13.661969 | -1.389627  | -2.766932 |
| 491 | 1 | 0 | -15.219082 | -2.297478  | -2.983567 |
| 492 | 6 | 0 | -13.955580 | 0.359484   | 2.824896  |
| 493 | 1 | 0 | -13.417722 | 1.006134   | 3.560637  |
| 494 | 1 | 0 | -14.977542 | 0.146307   | 3.222151  |
| 495 | 1 | 0 | -13.397833 | -0.604692  | 2.728267  |
| 496 | 6 | 0 | -15.203686 | 4.946552   | -0.132433 |
| 497 | 1 | 0 | -14.306552 | 5.017483   | -0.793888 |
| 498 | 1 | 0 | -15.817792 | 4.071123   | -0.456248 |
| 499 | 1 | 0 | -15.815345 | 5.874095   | -0.262637 |
| 500 | 6 | 0 | -13.181076 | 7.673410   | 4.189911  |
| 501 | 1 | 0 | -13.980837 | 7.345953   | 4.896388  |
| 502 | 1 | 0 | -12.479929 | 6.819875   | 4.008739  |
| 503 | 1 | 0 | -12.603525 | 8.504776   | 4.666118  |
| 504 | 1 | 0 | -10.794841 | 1.912234   | 1.370860  |

AP PI (Ac-AAAAAA-NHMe)<sub>8</sub>

|    |   |   |            |            |           |
|----|---|---|------------|------------|-----------|
| 1  | 6 | 0 | -11.879626 | -5.216887  | -2.505816 |
| 2  | 7 | 0 | -11.513643 | -4.165156  | -1.543942 |
| 3  | 1 | 0 | -10.539332 | -4.116493  | -1.231394 |
| 4  | 6 | 0 | -12.380878 | -3.208274  | -1.150644 |
| 5  | 8 | 0 | -13.547355 | -3.104966  | -1.562991 |
| 6  | 6 | 0 | -11.834636 | -2.247270  | -0.068449 |
| 7  | 7 | 0 | -12.288604 | -0.879398  | -0.365215 |
| 8  | 1 | 0 | -13.285019 | -0.729379  | -0.544223 |
| 9  | 6 | 0 | -11.341786 | -6.570150  | -1.982785 |
| 10 | 8 | 0 | -10.191778 | -6.662037  | -1.520494 |
| 11 | 7 | 0 | -12.192601 | -7.609505  | -2.109535 |
| 12 | 1 | 0 | -13.157301 | -7.434589  | -2.411029 |
| 13 | 6 | 0 | -11.824413 | -8.975590  | -1.700884 |
| 14 | 6 | 0 | -12.219804 | -9.956996  | -2.828841 |
| 15 | 8 | 0 | -13.374905 | -9.987103  | -3.283694 |
| 16 | 7 | 0 | -11.231869 | -10.775075 | -3.244044 |
| 17 | 1 | 0 | -10.286292 | -10.647636 | -2.872655 |
| 18 | 1 | 0 | -12.971656 | -5.243154  | -2.570876 |
| 19 | 1 | 0 | -10.739983 | -8.985244  | -1.552669 |
| 20 | 6 | 0 | -16.513122 | 2.292832   | -0.094555 |
| 21 | 6 | 0 | -17.135191 | 3.002375   | 1.132649  |
| 22 | 8 | 0 | -18.257618 | 2.691762   | 1.545890  |
| 23 | 7 | 0 | -16.363477 | 3.990391   | 1.647786  |
| 24 | 1 | 0 | -15.388064 | 4.074310   | 1.349497  |
| 25 | 6 | 0 | -16.809408 | 4.809932   | 2.776204  |
| 26 | 6 | 0 | -16.151977 | 6.203656   | 2.649186  |
| 27 | 8 | 0 | -15.044524 | 6.345073   | 2.111747  |
| 28 | 7 | 0 | -16.857052 | 7.222690   | 3.185241  |
| 29 | 1 | 0 | -17.714305 | 7.042907   | 3.699632  |
| 30 | 7 | 0 | -17.040422 | 0.921614   | -0.127086 |
| 31 | 1 | 0 | -17.998820 | 0.814777   | 0.190212  |
| 32 | 6 | 0 | -16.267645 | -0.160480  | -0.363700 |
| 33 | 8 | 0 | -15.067085 | -0.087991  | -0.664138 |
| 34 | 6 | 0 | -16.971658 | -1.527064  | -0.203449 |
| 35 | 7 | 0 | -16.382348 | -2.461052  | -1.164868 |
| 36 | 1 | 0 | -15.365971 | -2.457689  | -1.280507 |
| 37 | 1 | 0 | -15.425431 | 2.237354   | 0.011598  |
| 38 | 1 | 0 | -17.901590 | 4.894318   | 2.706745  |
| 39 | 1 | 0 | -18.037978 | -1.443681  | -0.449254 |
| 40 | 6 | 0 | -12.097326 | 1.542969   | -0.663779 |
| 41 | 7 | 0 | -11.593567 | 2.567810   | 0.263034  |

|    |   |   |            |            |           |
|----|---|---|------------|------------|-----------|
| 42 | 1 | 0 | -10.580669 | 2.642274   | 0.397513  |
| 43 | 6 | 0 | -12.403954 | 3.464723   | 0.865683  |
| 44 | 8 | 0 | -13.630157 | 3.532691   | 0.682815  |
| 45 | 6 | 0 | -11.695225 | 4.390724   | 1.883267  |
| 46 | 7 | 0 | -12.223752 | 5.758147   | 1.757565  |
| 47 | 1 | 0 | -13.237049 | 5.888108   | 1.811937  |
| 48 | 6 | 0 | -11.415086 | 6.838552   | 1.718157  |
| 49 | 8 | 0 | -10.174509 | 6.779871   | 1.745940  |
| 50 | 6 | 0 | -11.460419 | 0.182537   | -0.290774 |
| 51 | 8 | 0 | -10.258578 | 0.106463   | 0.015368  |
| 52 | 1 | 0 | -13.184540 | 1.495410   | -0.547215 |
| 53 | 1 | 0 | -10.622823 | 4.432985   | 1.670479  |
| 54 | 6 | 0 | -16.330922 | -4.284756  | -2.782355 |
| 55 | 6 | 0 | -17.114387 | -3.448949  | -1.741986 |
| 56 | 8 | 0 | -18.310017 | -3.662046  | -1.519186 |
| 57 | 7 | 0 | -16.852206 | -5.657551  | -2.746533 |
| 58 | 1 | 0 | -17.858014 | -5.753492  | -2.661799 |
| 59 | 6 | 0 | -16.056351 | -6.749958  | -2.723663 |
| 60 | 8 | 0 | -14.819109 | -6.685981  | -2.789928 |
| 61 | 6 | 0 | -16.785000 | -8.106419  | -2.571710 |
| 62 | 7 | 0 | -16.175111 | -9.098712  | -3.454340 |
| 63 | 1 | 0 | -15.192299 | -9.340630  | -3.321299 |
| 64 | 6 | 0 | -16.862656 | -9.603566  | -4.524193 |
| 65 | 8 | 0 | -18.032049 | -9.304164  | -4.782812 |
| 66 | 1 | 0 | -15.269918 | -4.325690  | -2.517825 |
| 67 | 1 | 0 | -17.827452 | -8.015829  | -2.902930 |
| 68 | 6 | 0 | -16.073523 | -10.582808 | -5.384096 |
| 69 | 1 | 0 | -15.044578 | -10.716739 | -5.039789 |
| 70 | 1 | 0 | -16.595191 | -11.545875 | -5.378848 |
| 71 | 1 | 0 | -16.075292 | -10.215133 | -6.415408 |
| 72 | 6 | 0 | -11.451403 | -11.773788 | -4.279544 |
| 73 | 1 | 0 | -12.424071 | -12.253756 | -4.137137 |
| 74 | 1 | 0 | -11.437993 | -11.328010 | -5.283102 |
| 75 | 1 | 0 | -10.661533 | -12.527834 | -4.217516 |
| 76 | 6 | 0 | -16.314831 | 8.580943   | 3.336327  |
| 77 | 1 | 0 | -15.234731 | 8.535740   | 3.167272  |
| 78 | 6 | 0 | -12.141081 | 8.200753   | 1.585224  |
| 79 | 1 | 0 | -13.168257 | 8.114766   | 1.953957  |
| 80 | 1 | 0 | -10.469178 | 9.385446   | 2.249597  |
| 81 | 6 | 0 | -12.094257 | 9.886974   | 3.399290  |
| 82 | 6 | 0 | -11.231895 | 10.866227  | 4.179435  |
| 83 | 1 | 0 | -10.204756 | 10.909997  | 3.810786  |
| 84 | 1 | 0 | -11.693135 | 11.857640  | 4.118243  |



|     |   |   |            |           |           |
|-----|---|---|------------|-----------|-----------|
| 85  | 1 | 0 | -11.235339 | 10.565826 | 5.232916  |
| 86  | 8 | 0 | -13.301445 | 9.741461  | 3.669098  |
| 87  | 7 | 0 | -11.460607 | 9.198858  | 2.420978  |
| 88  | 6 | 0 | -16.616849 | 9.036559  | 4.785435  |
| 89  | 1 | 0 | -14.807144 | 9.984940  | 4.793859  |
| 90  | 6 | 0 | -15.807645 | 10.428923 | 6.643431  |
| 91  | 1 | 0 | -15.597165 | 11.504799 | 6.627737  |
| 92  | 1 | 0 | -16.828517 | 10.265312 | 6.994940  |
| 93  | 1 | 0 | -15.114330 | 9.946446  | 7.345330  |
| 94  | 8 | 0 | -17.646936 | 8.664877  | 5.360011  |
| 95  | 7 | 0 | -15.684961 | 9.869550  | 5.306590  |
| 96  | 6 | 0 | -16.910926 | 9.589076  | 2.384535  |
| 97  | 1 | 0 | -16.740281 | 9.279641  | 1.324656  |
| 98  | 1 | 0 | -18.010072 | 9.705359  | 2.547453  |
| 99  | 1 | 0 | -16.417724 | 10.578567 | 2.549038  |
| 100 | 6 | 0 | -12.181280 | 8.559182  | 0.118600  |
| 101 | 1 | 0 | -11.151048 | 8.651215  | -0.305724 |
| 102 | 1 | 0 | -12.727813 | 7.759816  | -0.439582 |
| 103 | 1 | 0 | -12.715616 | 9.528064  | -0.035484 |
| 104 | 6 | 0 | -11.892571 | 3.788449  | 3.255619  |
| 105 | 1 | 0 | -12.977455 | 3.716099  | 3.515835  |
| 106 | 1 | 0 | -11.451239 | 2.761863  | 3.273273  |
| 107 | 1 | 0 | -11.381585 | 4.406939  | 4.033069  |
| 108 | 6 | 0 | -16.470450 | 4.248822  | 4.138599  |
| 109 | 1 | 0 | -16.938878 | 3.241956  | 4.267690  |
| 110 | 1 | 0 | -15.365813 | 4.145587  | 4.273900  |
| 111 | 1 | 0 | -16.865858 | 4.927097  | 4.933656  |
| 112 | 6 | 0 | -16.831492 | 3.104252  | -1.327197 |
| 113 | 1 | 0 | -16.427994 | 2.603800  | -2.241182 |
| 114 | 1 | 0 | -17.932800 | 3.240806  | -1.455220 |
| 115 | 1 | 0 | -16.353057 | 4.110350  | -1.234467 |
| 116 | 6 | 0 | -11.783178 | 1.817695  | -2.115548 |
| 117 | 1 | 0 | -10.680160 | 1.864256  | -2.291254 |
| 118 | 1 | 0 | -12.211489 | 0.999527  | -2.745108 |
| 119 | 1 | 0 | -12.235211 | 2.787138  | -2.438016 |
| 120 | 6 | 0 | -16.856456 | -1.949227 | 1.243663  |
| 121 | 1 | 0 | -17.374306 | -2.926951 | 1.402875  |
| 122 | 1 | 0 | -15.787864 | -2.060067 | 1.552085  |
| 123 | 1 | 0 | -17.339282 | -1.181978 | 1.896843  |
| 124 | 6 | 0 | -12.295050 | -2.763851 | 1.275108  |
| 125 | 1 | 0 | -13.410796 | -2.794429 | 1.338684  |
| 126 | 1 | 0 | -11.899932 | -3.798406 | 1.425536  |
| 127 | 1 | 0 | -11.910035 | -2.114358 | 2.098482  |

|     |   |   |            |            |           |
|-----|---|---|------------|------------|-----------|
| 128 | 6 | 0 | -16.467371 | -3.610330  | -4.126555 |
| 129 | 1 | 0 | -17.538761 | -3.511017  | -4.427459 |
| 130 | 1 | 0 | -16.014711 | -2.589926  | -4.070543 |
| 131 | 1 | 0 | -15.930710 | -4.193424  | -4.914248 |
| 132 | 6 | 0 | -11.319266 | -5.004091  | -3.892476 |
| 133 | 1 | 0 | -10.201617 | -4.982750  | -3.880375 |
| 134 | 1 | 0 | -11.653639 | -5.839490  | -4.555362 |
| 135 | 1 | 0 | -11.689024 | -4.041148  | -4.321490 |
| 136 | 6 | 0 | -16.762260 | -8.479771  | -1.108597 |
| 137 | 1 | 0 | -15.714510 | -8.594528  | -0.735837 |
| 138 | 1 | 0 | -17.266871 | -7.679322  | -0.514290 |
| 139 | 1 | 0 | -17.304171 | -9.442393  | -0.941445 |
| 140 | 6 | 0 | -12.498565 | -9.434261  | -0.429802 |
| 141 | 1 | 0 | -12.240488 | -8.758222  | 0.421055  |
| 142 | 1 | 0 | -13.610450 | -9.453102  | -0.547006 |
| 143 | 1 | 0 | -12.150406 | -10.466704 | -0.181812 |
| 144 | 6 | 0 | -2.386321  | -5.536929  | -1.080596 |
| 145 | 7 | 0 | -1.984577  | -4.329755  | -0.342819 |
| 146 | 1 | 0 | -0.996212  | -4.215467  | -0.098110 |
| 147 | 6 | 0 | -2.852146  | -3.333256  | -0.070971 |
| 148 | 8 | 0 | -4.042879  | -3.329900  | -0.422977 |
| 149 | 6 | 0 | -2.272448  | -2.174809  | 0.773859  |
| 150 | 7 | 0 | -2.729586  | -0.899692  | 0.201462  |
| 151 | 1 | 0 | -3.735650  | -0.765117  | 0.055996  |
| 152 | 6 | 0 | -1.860527  | -6.775823  | -0.320357 |
| 153 | 8 | 0 | -0.688411  | -6.823191  | 0.090089  |
| 154 | 7 | 0 | -2.753982  | -7.776806  | -0.182100 |
| 155 | 1 | 0 | -3.725559  | -7.625371  | -0.473958 |
| 156 | 6 | 0 | -2.408183  | -9.052258  | 0.465451  |
| 157 | 6 | 0 | -2.788082  | -10.211334 | -0.484785 |
| 158 | 8 | 0 | -3.937572  | -10.318104 | -0.946374 |
| 159 | 7 | 0 | -1.797385  | -11.086415 | -0.744485 |
| 160 | 1 | 0 | -0.854293  | -10.900709 | -0.391099 |
| 161 | 1 | 0 | -3.480031  | -5.550717  | -1.116535 |
| 162 | 1 | 0 | -1.179186  | -2.183095  | 0.728213  |
| 163 | 1 | 0 | -1.326741  | -9.041025  | 0.635858  |
| 164 | 6 | 0 | -7.028729  | 2.224988   | -0.527751 |
| 165 | 6 | 0 | -7.629148  | 3.282526   | 0.427777  |
| 166 | 8 | 0 | -8.832709  | 3.253638   | 0.733267  |
| 167 | 7 | 0 | -6.761332  | 4.224696   | 0.850069  |
| 168 | 1 | 0 | -5.767466  | 4.132168   | 0.618157  |
| 169 | 6 | 0 | -7.172835  | 5.341302   | 1.713820  |
| 170 | 6 | 0 | -6.638643  | 6.659275   | 1.105905  |

|     |   |   |           |            |           |
|-----|---|---|-----------|------------|-----------|
| 171 | 8 | 0 | -5.466026 | 6.749456   | 0.706055  |
| 172 | 7 | 0 | -7.527557 | 7.674483   | 1.085714  |
| 173 | 1 | 0 | -8.499056 | 7.494901   | 1.359412  |
| 174 | 7 | 0 | -7.510092 | 0.895868   | -0.121822 |
| 175 | 1 | 0 | -8.521007 | 0.753126   | -0.029470 |
| 176 | 6 | 0 | -6.678113 | -0.152844  | 0.037785  |
| 177 | 8 | 0 | -5.451390 | -0.105513  | -0.156034 |
| 178 | 6 | 0 | -7.352679 | -1.449947  | 0.540847  |
| 179 | 7 | 0 | -6.812668 | -2.589639  | -0.215202 |
| 180 | 1 | 0 | -5.795555 | -2.697349  | -0.272063 |
| 181 | 1 | 0 | -5.937611 | 2.218387   | -0.446751 |
| 182 | 1 | 0 | -8.266904 | 5.351543   | 1.738943  |
| 183 | 1 | 0 | -8.430301 | -1.412017  | 0.353943  |
| 184 | 6 | 0 | -2.532933 | 1.352436   | -0.722337 |
| 185 | 7 | 0 | -2.018581 | 2.568363   | -0.074490 |
| 186 | 1 | 0 | -1.003820 | 2.687676   | 0.001991  |
| 187 | 6 | 0 | -2.832748 | 3.567867   | 0.323140  |
| 188 | 8 | 0 | -4.065015 | 3.563684   | 0.169682  |
| 189 | 6 | 0 | -2.126828 | 4.736034   | 1.050977  |
| 190 | 7 | 0 | -2.681156 | 6.008435   | 0.563776  |
| 191 | 1 | 0 | -3.697131 | 6.139867   | 0.598326  |
| 192 | 6 | 0 | -1.894291 | 7.032418   | 0.173500  |
| 193 | 8 | 0 | -0.651805 | 7.004028   | 0.194547  |
| 194 | 6 | 0 | -1.884743 | 0.119126   | -0.052417 |
| 195 | 8 | 0 | -0.664860 | 0.089950   | 0.185106  |
| 196 | 1 | 0 | -3.617085 | 1.334802   | -0.575385 |
| 197 | 1 | 0 | -1.057478 | 4.733669   | 0.819152  |
| 198 | 6 | 0 | -6.869660 | -4.625696  | -1.565152 |
| 199 | 6 | 0 | -7.608508 | -3.545575  | -0.740075 |
| 200 | 8 | 0 | -8.844726 | -3.561923  | -0.625694 |
| 201 | 7 | 0 | -7.421289 | -5.947750  | -1.230627 |
| 202 | 1 | 0 | -8.435390 | -6.081478  | -1.301851 |
| 203 | 6 | 0 | -6.631477 | -7.004882  | -0.950964 |
| 204 | 8 | 0 | -5.388766 | -6.965706  | -0.948916 |
| 205 | 6 | 0 | -7.384711 | -8.301302  | -0.569655 |
| 206 | 7 | 0 | -6.739175 | -9.447137  | -1.224674 |
| 207 | 1 | 0 | -5.737351 | -9.595092  | -1.079702 |
| 208 | 6 | 0 | -7.434620 | -10.344426 | -1.961669 |
| 209 | 8 | 0 | -8.663953 | -10.273114 | -2.143126 |
| 210 | 1 | 0 | -5.807249 | -4.637897  | -1.303744 |
| 211 | 1 | 0 | -8.415573 | -8.257479  | -0.935405 |
| 212 | 6 | 0 | -6.615085 | -11.462709 | -2.585305 |
| 213 | 1 | 0 | -5.560841 | -11.420464 | -2.302918 |

|     |   |   |           |            |           |
|-----|---|---|-----------|------------|-----------|
| 214 | 1 | 0 | -7.046073 | -12.421164 | -2.277301 |
| 215 | 1 | 0 | -6.710043 | -11.393341 | -3.674521 |
| 216 | 6 | 0 | -2.006002 | -12.242333 | -1.603923 |
| 217 | 1 | 0 | -1.172225 | -12.936410 | -1.467576 |
| 218 | 1 | 0 | -2.942227 | -12.745565 | -1.342824 |
| 219 | 1 | 0 | -2.060334 | -11.955570 | -2.662321 |
| 220 | 6 | 0 | -7.174188 | 9.015410   | 0.593199  |
| 221 | 1 | 0 | -6.093420 | 9.016640   | 0.418156  |
| 222 | 6 | 0 | -2.651795 | 8.268166   | -0.367614 |
| 223 | 1 | 0 | -3.689364 | 8.255079   | -0.018865 |
| 224 | 1 | 0 | -1.026338 | 9.629212   | 0.022590  |
| 225 | 6 | 0 | -2.747133 | 10.452491  | 0.786293  |
| 226 | 6 | 0 | -1.949145 | 11.642209  | 1.295135  |
| 227 | 1 | 0 | -0.890009 | 11.580947  | 1.035004  |
| 228 | 1 | 0 | -2.383934 | 12.556060  | 0.876708  |
| 229 | 1 | 0 | -2.060201 | 11.692127  | 2.383910  |
| 230 | 8 | 0 | -3.979111 | 10.387600  | 0.954632  |
| 231 | 7 | 0 | -2.029923 | 9.488273   | 0.164631  |
| 232 | 6 | 0 | -7.542000 | 10.056692  | 1.675291  |
| 233 | 1 | 0 | -5.610363 | 10.756317  | 1.637097  |
| 234 | 6 | 0 | -6.748091 | 11.946879  | 3.010891  |
| 235 | 1 | 0 | -5.916231 | 12.653448  | 2.945612  |
| 236 | 1 | 0 | -7.687665 | 12.475381  | 2.821598  |
| 237 | 1 | 0 | -6.788755 | 11.539184  | 4.029535  |
| 238 | 8 | 0 | -8.685852 | 10.107007  | 2.161136  |
| 239 | 7 | 0 | -6.549659 | 10.898520  | 2.021079  |
| 240 | 6 | 0 | -7.882663 | 9.400421   | -0.683148 |
| 241 | 1 | 0 | -7.642085 | 8.679944   | -1.502117 |
| 242 | 1 | 0 | -8.991478 | 9.419572   | -0.539112 |
| 243 | 1 | 0 | -7.547502 | 10.419443  | -0.996045 |
| 244 | 6 | 0 | -2.643850 | 8.184226   | -1.876066 |
| 245 | 1 | 0 | -1.600388 | 8.186363   | -2.277383 |
| 246 | 1 | 0 | -3.146892 | 7.238068   | -2.193461 |
| 247 | 1 | 0 | -3.197134 | 9.046600   | -2.321045 |
| 248 | 6 | 0 | -2.302058 | 4.522475   | 2.536270  |
| 249 | 1 | 0 | -3.383554 | 4.506897   | 2.819364  |
| 250 | 1 | 0 | -1.843529 | 3.544506   | 2.823075  |
| 251 | 1 | 0 | -1.795779 | 5.334606   | 3.112529  |
| 252 | 6 | 0 | -6.654321 | 5.243957   | 3.129166  |
| 253 | 1 | 0 | -7.022356 | 4.310082   | 3.619374  |
| 254 | 1 | 0 | -5.536557 | 5.241708   | 3.152732  |
| 255 | 1 | 0 | -7.022000 | 6.121456   | 3.715514  |
| 256 | 6 | 0 | -7.409810 | 2.609716   | -1.937829 |

|     |   |   |            |            |           |
|-----|---|---|------------|------------|-----------|
| 257 | 1 | 0 | -6.988380  | 1.880774   | -2.671947 |
| 258 | 1 | 0 | -8.520293  | 2.640103   | -2.064256 |
| 259 | 1 | 0 | -6.996633  | 3.622739   | -2.165922 |
| 260 | 6 | 0 | -2.243286  | 1.276761   | -2.203086 |
| 261 | 1 | 0 | -1.143258  | 1.279223   | -2.402474 |
| 262 | 1 | 0 | -2.678830  | 0.333282   | -2.614381 |
| 263 | 1 | 0 | -2.703540  | 2.142740   | -2.738059 |
| 264 | 6 | 0 | -7.122974  | -1.537663  | 2.031605  |
| 265 | 1 | 0 | -7.607764  | -2.453016  | 2.450052  |
| 266 | 1 | 0 | -6.031874  | -1.571093  | 2.273070  |
| 267 | 1 | 0 | -7.571165  | -0.641059  | 2.525704  |
| 268 | 6 | 0 | -2.702334  | -2.390814  | 2.205794  |
| 269 | 1 | 0 | -3.816575  | -2.395756  | 2.298688  |
| 270 | 1 | 0 | -2.309769  | -3.374499  | 2.562362  |
| 271 | 1 | 0 | -2.294492  | -1.585891  | 2.864316  |
| 272 | 6 | 0 | -7.006576  | -4.258375  | -3.024314 |
| 273 | 1 | 0 | -8.079952  | -4.224889  | -3.335495 |
| 274 | 1 | 0 | -6.553855  | -3.250750  | -3.193430 |
| 275 | 1 | 0 | -6.473274  | -4.999703  | -3.667731 |
| 276 | 6 | 0 | -1.852179  | -5.600440  | -2.492008 |
| 277 | 1 | 0 | -0.734269  | -5.602543  | -2.503244 |
| 278 | 1 | 0 | -2.215692  | -6.537956  | -2.979815 |
| 279 | 1 | 0 | -2.212588  | -4.727292  | -3.088335 |
| 280 | 6 | 0 | -7.406801  | -8.389807  | 0.938458  |
| 281 | 1 | 0 | -6.371312  | -8.429844  | 1.358031  |
| 282 | 1 | 0 | -7.925199  | -7.489893  | 1.351268  |
| 283 | 1 | 0 | -7.960023  | -9.301520  | 1.270943  |
| 284 | 6 | 0 | -3.115400  | -9.277284  | 1.780121  |
| 285 | 1 | 0 | -2.863870  | -8.468501  | 2.508299  |
| 286 | 1 | 0 | -4.224980  | -9.300793  | 1.642117  |
| 287 | 1 | 0 | -2.790036  | -10.256300 | 2.209363  |
| 288 | 1 | 0 | -10.740639 | -2.242800  | -0.084875 |
| 289 | 6 | 0 | 7.126737   | -5.651526  | 0.096904  |
| 290 | 7 | 0 | 7.562101   | -4.316779  | 0.536276  |
| 291 | 1 | 0 | 8.557133   | -4.165958  | 0.725084  |
| 292 | 6 | 0 | 6.711168   | -3.271641  | 0.606637  |
| 293 | 8 | 0 | 5.511607   | -3.329483  | 0.293574  |
| 294 | 6 | 0 | 7.324970   | -1.965844  | 1.163838  |
| 295 | 7 | 0 | 6.850596   | -0.836943  | 0.350193  |
| 296 | 1 | 0 | 5.840051   | -0.730799  | 0.210112  |
| 297 | 6 | 0 | 7.654543   | -6.696277  | 1.105967  |
| 298 | 8 | 0 | 8.838712   | -6.672580  | 1.485182  |
| 299 | 7 | 0 | 6.752005   | -7.617989  | 1.496262  |

|     |   |   |          |            |           |
|-----|---|---|----------|------------|-----------|
| 300 | 1 | 0 | 5.774837 | -7.522528  | 1.198102  |
| 301 | 6 | 0 | 7.096702 | -8.713651  | 2.416085  |
| 302 | 6 | 0 | 6.709145 | -10.059838 | 1.759922  |
| 303 | 8 | 0 | 5.562180 | -10.260292 | 1.325672  |
| 304 | 7 | 0 | 7.693006 | -10.980640 | 1.726829  |
| 305 | 1 | 0 | 8.632817 | -10.722248 | 2.037438  |
| 306 | 1 | 0 | 6.032379 | -5.652706  | 0.088586  |
| 307 | 1 | 0 | 8.178761 | -8.668277  | 2.575998  |
| 308 | 6 | 0 | 2.518577 | 2.063519   | -0.927084 |
| 309 | 6 | 0 | 1.927128 | 3.305209   | -0.220225 |
| 310 | 8 | 0 | 0.734745 | 3.333495   | 0.125336  |
| 311 | 7 | 0 | 2.786460 | 4.331967   | -0.057655 |
| 312 | 1 | 0 | 3.775938 | 4.199122   | -0.287638 |
| 313 | 6 | 0 | 2.371819 | 5.612647   | 0.535105  |
| 314 | 6 | 0 | 2.893269 | 6.760545   | -0.359261 |
| 315 | 8 | 0 | 4.066980 | 6.767167   | -0.767476 |
| 316 | 7 | 0 | 1.995162 | 7.734347   | -0.612806 |
| 317 | 1 | 0 | 1.021614 | 7.608942   | -0.315821 |
| 318 | 7 | 0 | 2.055365 | 0.857298   | -0.225377 |
| 319 | 1 | 0 | 1.047744 | 0.737560   | -0.076092 |
| 320 | 6 | 0 | 2.897596 | -0.127709  | 0.144107  |
| 321 | 8 | 0 | 4.119348 | -0.124005  | -0.086026 |
| 322 | 6 | 0 | 2.244286 | -1.281063  | 0.939818  |
| 323 | 7 | 0 | 2.751606 | -2.560253  | 0.420507  |
| 324 | 1 | 0 | 3.765470 | -2.687176  | 0.350139  |
| 325 | 1 | 0 | 3.611004 | 2.079918   | -0.868627 |
| 326 | 1 | 0 | 1.277762 | 5.621515   | 0.563736  |
| 327 | 1 | 0 | 1.159741 | -1.273349  | 0.794622  |
| 328 | 6 | 0 | 7.015373 | 1.170564   | -1.028852 |
| 329 | 7 | 0 | 7.525934 | 2.497683   | -0.651951 |
| 330 | 1 | 0 | 8.540153 | 2.631555   | -0.606327 |
| 331 | 6 | 0 | 6.709565 | 3.559586   | -0.486130 |
| 332 | 8 | 0 | 5.477963 | 3.520628   | -0.638057 |
| 333 | 6 | 0 | 7.413005 | 4.859521   | -0.029306 |
| 334 | 7 | 0 | 6.841690 | 5.998303   | -0.764098 |
| 335 | 1 | 0 | 5.825223 | 6.130456   | -0.743060 |
| 336 | 6 | 0 | 7.613522 | 6.920178   | -1.375365 |
| 337 | 8 | 0 | 8.856783 | 6.900131   | -1.370919 |
| 338 | 6 | 0 | 7.686116 | 0.104638   | -0.132261 |
| 339 | 8 | 0 | 8.912136 | 0.122713   | 0.073861  |
| 340 | 1 | 0 | 5.933617 | 1.175476   | -0.864197 |
| 341 | 1 | 0 | 8.479392 | 4.815268   | -0.270696 |
| 342 | 6 | 0 | 2.637409 | -4.836897  | -0.460298 |

|     |   |   |          |            |           |
|-----|---|---|----------|------------|-----------|
| 343 | 6 | 0 | 1.935010 | -3.598472  | 0.145084  |
| 344 | 8 | 0 | 0.704731 | -3.579942  | 0.311345  |
| 345 | 7 | 0 | 2.081933 | -6.052788  | 0.152995  |
| 346 | 1 | 0 | 1.066020 | -6.189967  | 0.127761  |
| 347 | 6 | 0 | 2.867522 | -7.028124  | 0.652902  |
| 348 | 8 | 0 | 4.110536 | -6.997531  | 0.638008  |
| 349 | 6 | 0 | 2.110084 | -8.204761  | 1.312159  |
| 350 | 7 | 0 | 2.740524 | -9.469810  | 0.911137  |
| 351 | 1 | 0 | 3.744990 | -9.587090  | 1.064526  |
| 352 | 6 | 0 | 2.029395 | -10.500421 | 0.396518  |
| 353 | 8 | 0 | 0.796921 | -10.464099 | 0.227310  |
| 354 | 1 | 0 | 3.706819 | -4.812660  | -0.230067 |
| 355 | 1 | 0 | 1.075275 | -8.231678  | 0.956273  |
| 356 | 6 | 0 | 2.837070 | -11.729276 | 0.010581  |
| 357 | 1 | 0 | 3.894753 | -11.635935 | 0.267227  |
| 358 | 1 | 0 | 2.405545 | -12.600540 | 0.514291  |
| 359 | 1 | 0 | 2.731962 | -11.886295 | -1.068588 |
| 360 | 6 | 0 | 7.483912 | -12.308519 | 1.168597  |
| 361 | 1 | 0 | 6.490941 | -12.675973 | 1.442819  |
| 362 | 1 | 0 | 7.554189 | -12.303975 | 0.072728  |
| 363 | 1 | 0 | 8.244593 | -12.985139 | 1.568147  |
| 364 | 6 | 0 | 2.335542 | 8.928877   | -1.402143 |
| 365 | 1 | 0 | 3.419421 | 8.913418   | -1.555652 |
| 366 | 6 | 0 | 6.838187 | 8.011108   | -2.151302 |
| 367 | 1 | 0 | 5.804843 | 8.062678   | -1.794163 |
| 368 | 1 | 0 | 8.454814 | 9.432842   | -2.069720 |
| 369 | 6 | 0 | 6.730837 | 10.394091  | -1.498475 |
| 370 | 6 | 0 | 7.524013 | 11.668783  | -1.259277 |
| 371 | 1 | 0 | 8.580377 | 11.562111  | -1.516128 |
| 372 | 1 | 0 | 7.075087 | 12.473287  | -1.851019 |
| 373 | 1 | 0 | 7.427369 | 11.942488  | -0.202803 |
| 374 | 8 | 0 | 5.498995 | 10.362519  | -1.321815 |
| 375 | 7 | 0 | 7.453822 | 9.319606   | -1.892315 |
| 376 | 6 | 0 | 1.927768 | 10.186652  | -0.600568 |
| 377 | 1 | 0 | 3.851727 | 10.888078  | -0.760668 |
| 378 | 6 | 0 | 2.668181 | 12.350549  | 0.270771  |
| 379 | 1 | 0 | 2.620323 | 12.196009  | 1.356735  |
| 380 | 1 | 0 | 3.485500 | 13.041685  | 0.047466  |
| 381 | 1 | 0 | 1.720537 | 12.795081  | -0.048723 |
| 382 | 8 | 0 | 0.771946 | 10.330013  | -0.164937 |
| 383 | 7 | 0 | 2.902836 | 11.102068  | -0.439573 |
| 384 | 6 | 0 | 1.645910 | 8.987435   | -2.743865 |
| 385 | 1 | 0 | 1.917613 | 8.101397   | -3.367374 |

|     |   |   |          |           |           |
|-----|---|---|----------|-----------|-----------|
| 386 | 1 | 0 | 0.534178 | 9.012844  | -2.625134 |
| 387 | 1 | 0 | 1.966934 | 9.912756  | -3.281765 |
| 388 | 6 | 0 | 6.830227 | 7.614705  | -3.609334 |
| 389 | 1 | 0 | 7.869025 | 7.541495  | -4.016005 |
| 390 | 1 | 0 | 6.333377 | 6.619396  | -3.716421 |
| 391 | 1 | 0 | 6.263030 | 8.361267  | -4.216615 |
| 392 | 6 | 0 | 7.258971 | 4.960831  | 1.470150  |
| 393 | 1 | 0 | 6.181441 | 5.001630  | 1.765746  |
| 394 | 1 | 0 | 7.727258 | 4.066142  | 1.948849  |
| 395 | 1 | 0 | 7.767668 | 5.877362  | 1.856440  |
| 396 | 6 | 0 | 2.897991 | 5.841130  | 1.932354  |
| 397 | 1 | 0 | 2.537417 | 5.041282  | 2.623819  |
| 398 | 1 | 0 | 4.015869 | 5.848936  | 1.948782  |
| 399 | 1 | 0 | 2.528721 | 6.827297  | 2.306685  |
| 400 | 6 | 0 | 2.108884 | 2.122320  | -2.379849 |
| 401 | 1 | 0 | 2.523268 | 1.249620  | -2.940731 |
| 402 | 1 | 0 | 0.996144 | 2.118845  | -2.488527 |
| 403 | 1 | 0 | 2.509446 | 3.060517  | -2.836233 |
| 404 | 6 | 0 | 7.285066 | 0.795109  | -2.467256 |
| 405 | 1 | 0 | 8.382088 | 0.766456  | -2.680717 |
| 406 | 1 | 0 | 6.855258 | -0.216510 | -2.669394 |
| 407 | 1 | 0 | 6.806716 | 1.528743  | -3.160763 |
| 408 | 6 | 0 | 2.539882 | -1.053225 | 2.403800  |
| 409 | 1 | 0 | 2.075139 | -1.855038 | 3.027541  |
| 410 | 1 | 0 | 3.640660 | -1.043334 | 2.599010  |
| 411 | 1 | 0 | 2.112837 | -0.068652 | 2.715577  |
| 412 | 6 | 0 | 6.948939 | -1.868832 | 2.623809  |
| 413 | 1 | 0 | 5.839025 | -1.842640 | 2.756307  |
| 414 | 1 | 0 | 7.352711 | -2.758122 | 3.166900  |
| 415 | 1 | 0 | 7.382960 | -0.946450 | 3.080736  |
| 416 | 6 | 0 | 2.462488 | -4.775179 | -1.959617 |
| 417 | 1 | 0 | 1.381034 | -4.786010 | -2.243059 |
| 418 | 1 | 0 | 2.923171 | -3.832502 | -2.344443 |
| 419 | 1 | 0 | 2.966687 | -5.642868 | -2.450400 |
| 420 | 6 | 0 | 7.624873 | -6.039957 | -1.274872 |
| 421 | 1 | 0 | 8.742079 | -6.064054 | -1.309253 |
| 422 | 1 | 0 | 7.238084 | -7.056701 | -1.531230 |
| 423 | 1 | 0 | 7.260534 | -5.317074 | -2.044698 |
| 424 | 6 | 0 | 2.105140 | -7.966663 | 2.804069  |
| 425 | 1 | 0 | 3.145124 | -7.921157 | 3.211648  |
| 426 | 1 | 0 | 1.594260 | -6.996130 | 3.018820  |
| 427 | 1 | 0 | 1.552737 | -8.782343 | 3.330712  |
| 428 | 6 | 0 | 6.394734 | -8.628327 | 3.749882  |



|     |   |   |           |            |           |
|-----|---|---|-----------|------------|-----------|
| 429 | 1 | 0 | 6.651413  | -7.675035  | 4.272366  |
| 430 | 1 | 0 | 5.284456  | -8.678672  | 3.625049  |
| 431 | 1 | 0 | 6.719198  | -9.484036  | 4.391070  |
| 432 | 6 | 0 | 16.569252 | -5.600675  | 1.248184  |
| 433 | 7 | 0 | 17.134444 | -4.248461  | 1.135413  |
| 434 | 1 | 0 | 18.101221 | -4.146341  | 1.425714  |
| 435 | 6 | 0 | 16.381004 | -3.154164  | 0.876826  |
| 436 | 8 | 0 | 15.174072 | -3.204497  | 0.606851  |
| 437 | 6 | 0 | 17.129943 | -1.805055  | 0.973726  |
| 438 | 7 | 0 | 16.501966 | -0.861873  | 0.046620  |
| 439 | 1 | 0 | 15.481676 | -0.868785  | -0.035904 |
| 440 | 6 | 0 | 17.085720 | -6.222164  | 2.568398  |
| 441 | 8 | 0 | 18.231543 | -5.998639  | 2.972589  |
| 442 | 7 | 0 | 16.185931 | -7.034170  | 3.180303  |
| 443 | 1 | 0 | 15.218956 | -7.056942  | 2.839115  |
| 444 | 6 | 0 | 16.505000 | -7.739258  | 4.425195  |
| 445 | 6 | 0 | 16.168276 | -9.236738  | 4.239630  |
| 446 | 8 | 0 | 15.040647 | -9.608860  | 3.893688  |
| 447 | 7 | 0 | 17.187591 | -10.096369 | 4.501660  |
| 448 | 1 | 0 | 18.097020 | -9.703525  | 4.703723  |
| 449 | 1 | 0 | 15.479845 | -5.503557  | 1.273733  |
| 450 | 1 | 0 | 18.174250 | -1.923310  | 0.656801  |
| 451 | 1 | 0 | 17.578596 | -7.588309  | 4.593003  |
| 452 | 6 | 0 | 12.079199 | 1.832907   | -1.481902 |
| 453 | 6 | 0 | 11.477117 | 3.182534   | -1.025919 |
| 454 | 8 | 0 | 10.297583 | 3.256434   | -0.647475 |
| 455 | 7 | 0 | 12.308120 | 4.241927   | -1.115259 |
| 456 | 1 | 0 | 13.288518 | 4.099063   | -1.366132 |
| 457 | 6 | 0 | 11.865119 | 5.607857   | -0.791155 |
| 458 | 6 | 0 | 12.381567 | 6.558216   | -1.893799 |
| 459 | 8 | 0 | 13.556995 | 6.488605   | -2.289637 |
| 460 | 7 | 0 | 11.480085 | 7.457516   | -2.341702 |
| 461 | 1 | 0 | 10.506842 | 7.395915   | -2.022612 |
| 462 | 7 | 0 | 11.635136 | 0.783647   | -0.552524 |
| 463 | 1 | 0 | 10.632725 | 0.714080   | -0.346699 |
| 464 | 6 | 0 | 12.476394 | -0.146241  | -0.055088 |
| 465 | 8 | 0 | 13.682947 | -0.224184  | -0.341209 |
| 466 | 6 | 0 | 11.842268 | -1.106382  | 0.976643  |
| 467 | 7 | 0 | 12.332245 | -2.471986  | 0.728485  |
| 468 | 1 | 0 | 13.339534 | -2.614130  | 0.629162  |
| 469 | 1 | 0 | 13.171990 | 1.873135   | -1.440772 |
| 470 | 1 | 0 | 10.771080 | 5.603606   | -0.774749 |
| 471 | 1 | 0 | 10.754435 | -1.121513  | 0.859029  |

|     |   |   |           |            |           |
|-----|---|---|-----------|------------|-----------|
| 472 | 6 | 0 | 16.386103 | 0.983994   | -1.543225 |
| 473 | 7 | 0 | 17.024026 | 2.304550   | -1.620262 |
| 474 | 1 | 0 | 18.032410 | 2.306454   | -1.497784 |
| 475 | 6 | 0 | 16.327587 | 3.462149   | -1.641304 |
| 476 | 8 | 0 | 15.091477 | 3.516353   | -1.695973 |
| 477 | 6 | 0 | 17.189390 | 4.743007   | -1.563067 |
| 478 | 7 | 0 | 16.432311 | 5.846312   | -2.160242 |
| 479 | 1 | 0 | 15.409633 | 5.812875   | -2.128938 |
| 480 | 6 | 0 | 17.056851 | 6.953778   | -2.625179 |
| 481 | 8 | 0 | 18.281511 | 7.127550   | -2.597333 |
| 482 | 6 | 0 | 17.211147 | 0.126323   | -0.552940 |
| 483 | 8 | 0 | 18.417660 | 0.332963   | -0.383814 |
| 484 | 1 | 0 | 15.367649 | 1.114650   | -1.166120 |
| 485 | 1 | 0 | 18.105950 | 4.610874   | -2.153838 |
| 486 | 6 | 0 | 12.173146 | -4.899424  | 0.431835  |
| 487 | 6 | 0 | 11.504329 | -3.538281  | 0.741745  |
| 488 | 8 | 0 | 10.282787 | -3.465983  | 0.948799  |
| 489 | 7 | 0 | 11.595892 | -5.922316  | 1.317376  |
| 490 | 1 | 0 | 10.576947 | -6.042155  | 1.323733  |
| 491 | 6 | 0 | 12.355381 | -6.734049  | 2.078414  |
| 492 | 8 | 0 | 13.599241 | -6.722554  | 2.082245  |
| 493 | 6 | 0 | 11.566854 | -7.676211  | 3.018713  |
| 494 | 7 | 0 | 12.208427 | -8.997321  | 3.038143  |
| 495 | 1 | 0 | 13.197664 | -9.055404  | 3.281368  |
| 496 | 6 | 0 | 11.519241 | -10.141525 | 2.808857  |
| 497 | 8 | 0 | 10.300853 | -10.168185 | 2.563982  |
| 498 | 1 | 0 | 13.246066 | -4.849484  | 0.641542  |
| 499 | 1 | 0 | 10.549440 | -7.815221  | 2.640440  |
| 500 | 6 | 0 | 12.338466 | -11.421774 | 2.850498  |
| 501 | 1 | 0 | 13.379956 | -11.248143 | 3.130791  |
| 502 | 1 | 0 | 11.871350 | -12.110285 | 3.562168  |
| 503 | 1 | 0 | 12.297094 | -11.890895 | 1.861488  |
| 504 | 6 | 0 | 17.064701 | -11.544091 | 4.384885  |
| 505 | 1 | 0 | 17.551785 | -12.032659 | 5.235274  |
| 506 | 1 | 0 | 16.003091 | -11.797894 | 4.383238  |
| 507 | 1 | 0 | 17.515461 | -11.911588 | 3.454435  |
| 508 | 6 | 0 | 11.815834 | 8.461434   | -3.363946 |
| 509 | 1 | 0 | 12.900129 | 8.410436   | -3.514184 |
| 510 | 6 | 0 | 16.114738 | 8.021869   | -3.235208 |
| 511 | 1 | 0 | 15.278781 | 8.197667   | -2.548622 |
| 512 | 1 | 0 | 17.905728 | 9.120693   | -3.284981 |
| 513 | 6 | 0 | 16.340730 | 10.473602  | -3.491483 |
| 514 | 6 | 0 | 17.302096 | 11.649170  | -3.566928 |

|     |   |   |           |           |           |
|-----|---|---|-----------|-----------|-----------|
| 515 | 1 | 0 | 18.352695 | 11.354507 | -3.487306 |
| 516 | 1 | 0 | 17.145507 | 12.169536 | -4.517316 |
| 517 | 1 | 0 | 17.062215 | 12.351090 | -2.761959 |
| 518 | 8 | 0 | 15.111507 | 10.648825 | -3.548707 |
| 519 | 7 | 0 | 16.900597 | 9.252627  | -3.355079 |
| 520 | 6 | 0 | 11.397330 | 9.859821  | -2.852365 |
| 521 | 1 | 0 | 13.299075 | 10.584410 | -3.209285 |
| 522 | 6 | 0 | 12.077937 | 12.185800 | -2.513958 |
| 523 | 1 | 0 | 12.928795 | 12.803852 | -2.810139 |
| 524 | 1 | 0 | 11.169009 | 12.561341 | -2.995529 |
| 525 | 1 | 0 | 11.940457 | 12.259999 | -1.427816 |
| 526 | 8 | 0 | 10.246326 | 10.069376 | -2.432965 |
| 527 | 7 | 0 | 12.344458 | 10.813797 | -2.924895 |
| 528 | 6 | 0 | 11.130007 | 8.231253  | -4.689608 |
| 529 | 1 | 0 | 11.410324 | 7.236404  | -5.113196 |
| 530 | 1 | 0 | 10.017725 | 8.271096  | -4.579688 |
| 531 | 1 | 0 | 11.444052 | 9.026158  | -5.409474 |
| 532 | 6 | 0 | 15.538515 | 7.514368  | -4.534469 |
| 533 | 1 | 0 | 16.336138 | 7.161631  | -5.231129 |
| 534 | 1 | 0 | 14.839760 | 6.667097  | -4.318047 |
| 535 | 1 | 0 | 14.957535 | 8.325987  | -5.039700 |
| 536 | 6 | 0 | 17.599804 | 4.964474  | -0.125036 |
| 537 | 1 | 0 | 16.711547 | 5.064793  | 0.544515  |
| 538 | 1 | 0 | 18.217815 | 4.103293  | 0.228205  |
| 539 | 1 | 0 | 18.213528 | 5.896233  | -0.043288 |
| 540 | 6 | 0 | 12.369068 | 6.120328  | 0.537018  |
| 541 | 1 | 0 | 12.021278 | 5.461658  | 1.369637  |
| 542 | 1 | 0 | 13.485408 | 6.163188  | 0.559263  |
| 543 | 1 | 0 | 11.968399 | 7.149624  | 0.708051  |
| 544 | 6 | 0 | 11.661268 | 1.603003  | -2.915352 |
| 545 | 1 | 0 | 12.084432 | 0.642636  | -3.298387 |
| 546 | 1 | 0 | 10.548135 | 1.564196  | -3.012592 |
| 547 | 1 | 0 | 12.046530 | 2.438792  | -3.549407 |
| 548 | 6 | 0 | 16.312116 | 0.254533  | -2.862971 |
| 549 | 1 | 0 | 17.329398 | 0.024072  | -3.262595 |
| 550 | 1 | 0 | 15.756125 | -0.704482 | -2.717286 |
| 551 | 1 | 0 | 15.765196 | 0.868114  | -3.620038 |
| 552 | 6 | 0 | 12.172467 | -0.579335 | 2.353805  |
| 553 | 1 | 0 | 11.725163 | -1.232843 | 3.141794  |
| 554 | 1 | 0 | 13.277066 | -0.530475 | 2.516742  |
| 555 | 1 | 0 | 11.748910 | 0.449051  | 2.464280  |
| 556 | 6 | 0 | 17.128835 | -1.366948 | 2.420737  |
| 557 | 1 | 0 | 16.088497 | -1.235987 | 2.806873  |

|     |   |   |           |           |           |
|-----|---|---|-----------|-----------|-----------|
| 558 | 1 | 0 | 17.648016 | -2.134082 | 3.045566  |
| 559 | 1 | 0 | 17.671934 | -0.395803 | 2.529586  |
| 560 | 6 | 0 | 11.980698 | -5.186010 | -1.038226 |
| 561 | 1 | 0 | 10.895788 | -5.238626 | -1.303414 |
| 562 | 1 | 0 | 12.455678 | -4.370148 | -1.636510 |
| 563 | 1 | 0 | 12.460641 | -6.155790 | -1.316251 |
| 564 | 6 | 0 | 16.946983 | -6.520884 | 0.113186  |
| 565 | 1 | 0 | 18.051384 | -6.684069 | 0.068878  |
| 566 | 1 | 0 | 16.444134 | -7.507967 | 0.263124  |
| 567 | 1 | 0 | 16.611659 | -6.097667 | -0.865009 |
| 568 | 6 | 0 | 11.492628 | -7.010187 | 4.372968  |
| 569 | 1 | 0 | 12.512009 | -6.831593 | 4.795489  |
| 570 | 1 | 0 | 10.970541 | -6.027279 | 4.270017  |
| 571 | 1 | 0 | 10.916924 | -7.643061 | 5.091328  |
| 572 | 6 | 0 | 15.749262 | -7.241093 | 5.633748  |
| 573 | 1 | 0 | 15.969250 | -6.161525 | 5.818653  |
| 574 | 1 | 0 | 14.645826 | -7.361615 | 5.496408  |
| 575 | 1 | 0 | 16.060587 | -7.826750 | 6.532869  |
| 576 | 1 | 0 | 8.415739  | -1.995387 | 1.082689  |

AP PI (Ac-AAAAAA-NHMe)<sub>9</sub>

|    |   |   |            |           |           |
|----|---|---|------------|-----------|-----------|
| 1  | 6 | 0 | -14.170252 | 5.105032  | 2.877184  |
| 2  | 7 | 0 | -13.835085 | 4.112781  | 1.843743  |
| 3  | 1 | 0 | -12.870231 | 4.081449  | 1.500810  |
| 4  | 6 | 0 | -14.715945 | 3.181859  | 1.419808  |
| 5  | 8 | 0 | -15.870289 | 3.055282  | 1.859129  |
| 6  | 6 | 0 | -14.204069 | 2.286096  | 0.267319  |
| 7  | 7 | 0 | -14.655833 | 0.904363  | 0.495174  |
| 8  | 1 | 0 | -15.646884 | 0.747119  | 0.696190  |
| 9  | 6 | 0 | -13.639945 | 6.485903  | 2.423487  |
| 10 | 8 | 0 | -12.504283 | 6.601726  | 1.932304  |
| 11 | 7 | 0 | -14.479355 | 7.519203  | 2.642461  |
| 12 | 1 | 0 | -15.435794 | 7.329917  | 2.960987  |
| 13 | 6 | 0 | -14.114056 | 8.906118  | 2.308492  |
| 14 | 6 | 0 | -14.474964 | 9.818710  | 3.503444  |
| 15 | 8 | 0 | -15.617512 | 9.825062  | 3.990011  |
| 16 | 7 | 0 | -13.472808 | 10.607929 | 3.939892  |
| 17 | 1 | 0 | -12.537567 | 10.499006 | 3.537485  |
| 18 | 1 | 0 | -15.260038 | 5.131321  | 2.972775  |
| 19 | 1 | 0 | -13.033668 | 8.920448  | 2.133498  |
| 20 | 6 | 0 | -18.892660 | -2.241346 | 0.162181  |
| 21 | 6 | 0 | -19.550736 | -2.877133 | -1.086456 |
| 22 | 8 | 0 | -20.682010 | -2.539007 | -1.451247 |
| 23 | 7 | 0 | -18.798450 | -3.836878 | -1.678220 |
| 24 | 1 | 0 | -17.815879 | -3.942125 | -1.411727 |
| 25 | 6 | 0 | -19.278262 | -4.586165 | -2.840893 |
| 26 | 6 | 0 | -18.617210 | -5.983867 | -2.820897 |
| 27 | 8 | 0 | -17.500455 | -6.159703 | -2.314003 |
| 28 | 7 | 0 | -19.331533 | -6.965355 | -3.412308 |
| 29 | 1 | 0 | -20.194880 | -6.750318 | -3.902658 |
| 30 | 7 | 0 | -19.416465 | -0.874484 | 0.290673  |
| 31 | 1 | 0 | -20.382128 | -0.748447 | 0.003748  |
| 32 | 6 | 0 | -18.635221 | 0.191088  | 0.570874  |
| 33 | 8 | 0 | -17.427275 | 0.099748  | 0.834287  |
| 34 | 6 | 0 | -19.339894 | 1.565582  | 0.511809  |
| 35 | 7 | 0 | -18.719169 | 2.441295  | 1.507751  |
| 36 | 1 | 0 | -17.699912 | 2.428342  | 1.593140  |
| 37 | 1 | 0 | -17.808446 | -2.180014 | 0.027735  |
| 38 | 1 | 0 | -20.367783 | -4.677936 | -2.743791 |
| 39 | 1 | 0 | -20.398616 | 1.469056  | 0.784231  |
| 40 | 6 | 0 | -14.466322 | -1.531093 | 0.651026  |
| 41 | 7 | 0 | -13.989494 | -2.504540 | -0.342793 |

|    |   |   |            |            |           |
|----|---|---|------------|------------|-----------|
| 42 | 1 | 0 | -12.980687 | -2.572217  | -0.508315 |
| 43 | 6 | 0 | -14.817303 | -3.366859  | -0.971583 |
| 44 | 8 | 0 | -16.038374 | -3.444262  | -0.760141 |
| 45 | 6 | 0 | -14.137428 | -4.235950  | -2.056894 |
| 46 | 7 | 0 | -14.669076 | -5.606494  | -1.996611 |
| 47 | 1 | 0 | -15.683838 | -5.729831  | -2.035431 |
| 48 | 6 | 0 | -13.864961 | -6.690343  | -2.030173 |
| 49 | 8 | 0 | -12.624841 | -6.635220  | -2.077288 |
| 50 | 6 | 0 | -13.834453 | -0.153590  | 0.337108  |
| 51 | 8 | 0 | -12.641597 | -0.063108  | 0.001359  |
| 52 | 1 | 0 | -15.555935 | -1.474584  | 0.564830  |
| 53 | 1 | 0 | -13.060421 | -4.293678  | -1.872846 |
| 54 | 6 | 0 | -18.611582 | 4.168790   | 3.224616  |
| 55 | 6 | 0 | -19.429340 | 3.396903   | 2.161601  |
| 56 | 8 | 0 | -20.629882 | 3.626336   | 1.986514  |
| 57 | 7 | 0 | -19.128010 | 5.542663   | 3.284883  |
| 58 | 1 | 0 | -20.135268 | 5.646210   | 3.232181  |
| 59 | 6 | 0 | -18.328257 | 6.632225   | 3.309115  |
| 60 | 8 | 0 | -17.090041 | 6.560824   | 3.340092  |
| 61 | 6 | 0 | -19.054354 | 7.997746   | 3.259208  |
| 62 | 7 | 0 | -18.416003 | 8.933128   | 4.182997  |
| 63 | 1 | 0 | -17.436097 | 9.179753   | 4.037555  |
| 64 | 6 | 0 | -19.069674 | 9.369755   | 5.302919  |
| 65 | 8 | 0 | -20.231894 | 9.056229   | 5.576788  |
| 66 | 1 | 0 | -17.558964 | 4.222664   | 2.930645  |
| 67 | 1 | 0 | -20.087874 | 7.890482   | 3.612768  |
| 68 | 6 | 0 | -18.251605 | 10.289842  | 6.200249  |
| 69 | 1 | 0 | -17.237963 | 10.456805  | 5.826285  |
| 70 | 1 | 0 | -18.778503 | 11.246000  | 6.287487  |
| 71 | 1 | 0 | -18.209099 | 9.846928   | 7.200763  |
| 72 | 6 | 0 | -13.661586 | 11.546188  | 5.036230  |
| 73 | 1 | 0 | -14.633655 | 12.039544  | 4.944074  |
| 74 | 1 | 0 | -13.628884 | 11.043173  | 6.011892  |
| 75 | 1 | 0 | -12.867766 | 12.297724  | 4.999620  |
| 76 | 6 | 0 | -18.788226 | -8.306492  | -3.672622 |
| 77 | 1 | 0 | -17.705906 | -8.270559  | -3.515932 |
| 78 | 6 | 0 | -14.595661 | -8.054862  | -1.958177 |
| 79 | 1 | 0 | -15.627288 | -7.944836  | -2.307543 |
| 80 | 1 | 0 | -12.941864 | -9.217501  | -2.701121 |
| 81 | 6 | 0 | -14.578728 | -9.631209  | -3.869008 |
| 82 | 6 | 0 | -13.732052 | -10.573688 | -4.709339 |
| 83 | 1 | 0 | -12.704096 | -10.651631 | -4.348601 |
| 84 | 1 | 0 | -14.205442 | -11.561243 | -4.704164 |

|     |   |   |            |            |           |
|-----|---|---|------------|------------|-----------|
| 85  | 1 | 0 | -13.735510 | -10.212099 | -5.743393 |
| 86  | 8 | 0 | -15.784832 | -9.454018  | -4.124530 |
| 87  | 7 | 0 | -13.932471 | -9.011505  | -2.853901 |
| 88  | 6 | 0 | -19.109603 | -8.652501  | -5.147932 |
| 89  | 1 | 0 | -17.305054 | -9.605364  | -5.248992 |
| 90  | 6 | 0 | -18.327736 | -9.902639  | -7.115633 |
| 91  | 1 | 0 | -18.136914 | -10.980276 | -7.182734 |
| 92  | 1 | 0 | -19.347408 | -9.694895  | -7.446690 |
| 93  | 1 | 0 | -17.629416 | -9.381098  | -7.783709 |
| 94  | 8 | 0 | -20.145100 | -8.235536  | -5.680208 |
| 95  | 7 | 0 | -18.187512 | -9.446882  | -5.741650 |
| 96  | 6 | 0 | -19.368182 | -9.385539  | -2.791329 |
| 97  | 1 | 0 | -19.184353 | -9.155612  | -1.713568 |
| 98  | 1 | 0 | -20.469036 | -9.493972  | -2.947937 |
| 99  | 1 | 0 | -18.873892 | -10.357779 | -3.035979 |
| 100 | 6 | 0 | -14.617675 | -8.489300  | -0.511916 |
| 101 | 1 | 0 | -13.582261 | -8.607270  | -0.107082 |
| 102 | 1 | 0 | -15.153099 | -7.718105  | 0.094605  |
| 103 | 1 | 0 | -15.154195 | -9.462898  | -0.401238 |
| 104 | 6 | 0 | -14.364748 | -3.555717  | -3.387558 |
| 105 | 1 | 0 | -15.455181 | -3.464420  | -3.616702 |
| 106 | 1 | 0 | -13.918486 | -2.531540  | -3.357550 |
| 107 | 1 | 0 | -13.875975 | -4.130843  | -4.211208 |
| 108 | 6 | 0 | -18.982144 | -3.940332  | -4.175570 |
| 109 | 1 | 0 | -19.453126 | -2.927592  | -4.225708 |
| 110 | 1 | 0 | -17.882285 | -3.827925  | -4.339327 |
| 111 | 1 | 0 | -19.403693 | -4.566995  | -4.999027 |
| 112 | 6 | 0 | -19.176222 | -3.123935  | 1.353701  |
| 113 | 1 | 0 | -18.746164 | -2.677603  | 2.283478  |
| 114 | 1 | 0 | -20.273498 | -3.268648  | 1.505142  |
| 115 | 1 | 0 | -18.701460 | -4.122450  | 1.188414  |
| 116 | 6 | 0 | -14.117284 | -1.885512  | 2.077355  |
| 117 | 1 | 0 | -13.010436 | -1.942694  | 2.223139  |
| 118 | 1 | 0 | -14.528234 | -1.102789  | 2.761226  |
| 119 | 1 | 0 | -14.563519 | -2.870783  | 2.357096  |
| 120 | 6 | 0 | -19.267022 | 2.071218   | -0.911111 |
| 121 | 1 | 0 | -19.786442 | 3.057245   | -0.997342 |
| 122 | 1 | 0 | -18.207881 | 2.198527   | -1.244738 |
| 123 | 1 | 0 | -19.771648 | 1.344041   | -1.593018 |
| 124 | 6 | 0 | -14.699254 | 2.883052   | -1.029716 |
| 125 | 1 | 0 | -15.816169 | 2.920617   | -1.060172 |
| 126 | 1 | 0 | -14.303655 | 3.923549   | -1.129376 |
| 127 | 1 | 0 | -14.340178 | 2.282595   | -1.900663 |

|     |   |   |            |           |           |
|-----|---|---|------------|-----------|-----------|
| 128 | 6 | 0 | -18.709993 | 3.417058  | 4.530590  |
| 129 | 1 | 0 | -19.772185 | 3.302405  | 4.857501  |
| 130 | 1 | 0 | -18.262977 | 2.400819  | 4.401375  |
| 131 | 1 | 0 | -18.147672 | 3.952024  | 5.334384  |
| 132 | 6 | 0 | -13.574809 | 4.805986  | 4.232987  |
| 133 | 1 | 0 | -12.457981 | 4.782112  | 4.190216  |
| 134 | 1 | 0 | -13.887972 | 5.600145  | 4.954348  |
| 135 | 1 | 0 | -13.937659 | 3.819651  | 4.611832  |
| 136 | 6 | 0 | -19.069469 | 8.458930  | 1.821282  |
| 137 | 1 | 0 | -18.031666 | 8.593332  | 1.427804  |
| 138 | 1 | 0 | -19.593332 | 7.697275  | 1.193590  |
| 139 | 1 | 0 | -19.611551 | 9.431347  | 1.727435  |
| 140 | 6 | 0 | -14.817282 | 9.444344  | 1.085194  |
| 141 | 1 | 0 | -14.584039 | 8.820618  | 0.188440  |
| 142 | 1 | 0 | -15.925782 | 9.460190  | 1.231277  |
| 143 | 1 | 0 | -14.469874 | 10.488673 | 0.891982  |
| 144 | 6 | 0 | -4.721677  | 5.480905  | 1.239533  |
| 145 | 7 | 0 | -4.337227  | 4.314978  | 0.429882  |
| 146 | 1 | 0 | -3.352360  | 4.208720  | 0.167333  |
| 147 | 6 | 0 | -5.214738  | 3.340915  | 0.113583  |
| 148 | 8 | 0 | -6.401302  | 3.324734  | 0.479677  |
| 149 | 6 | 0 | -4.653514  | 2.227364  | -0.801278 |
| 150 | 7 | 0 | -5.112140  | 0.925845  | -0.292589 |
| 151 | 1 | 0 | -6.116676  | 0.791546  | -0.137084 |
| 152 | 6 | 0 | -4.200045  | 6.758876  | 0.543242  |
| 153 | 8 | 0 | -3.034886  | 6.823904  | 0.116638  |
| 154 | 7 | 0 | -5.090291  | 7.770506  | 0.479494  |
| 155 | 1 | 0 | -6.057404  | 7.606247  | 0.778331  |
| 156 | 6 | 0 | -4.747921  | 9.082701  | -0.092199 |
| 157 | 6 | 0 | -5.104450  | 10.179966 | 0.937377  |
| 158 | 8 | 0 | -6.247157  | 10.266225 | 1.420302  |
| 159 | 7 | 0 | -4.102160  | 11.026035 | 1.243181  |
| 160 | 1 | 0 | -3.164852  | 10.856650 | 0.865952  |
| 161 | 1 | 0 | -5.814621  | 5.497701  | 1.292235  |
| 162 | 1 | 0 | -3.559686  | 2.226714  | -0.769832 |
| 163 | 1 | 0 | -3.669666  | 9.076523  | -0.282364 |
| 164 | 6 | 0 | -9.411671  | -2.216270 | 0.356389  |
| 165 | 6 | 0 | -10.035937 | -3.222039 | -0.638915 |
| 166 | 8 | 0 | -11.244609 | -3.172175 | -0.920647 |
| 167 | 7 | 0 | -9.181245  | -4.146865 | -1.122028 |
| 168 | 1 | 0 | -8.183001  | -4.070670 | -0.903282 |
| 169 | 6 | 0 | -9.613637  | -5.219241 | -2.030565 |
| 170 | 6 | 0 | -9.078186  | -6.567160 | -1.493378 |



|     |   |   |            |           |           |
|-----|---|---|------------|-----------|-----------|
| 171 | 8 | 0 | -7.899292  | -6.683312 | -1.119612 |
| 172 | 7 | 0 | -9.974134  | -7.576534 | -1.502282 |
| 173 | 1 | 0 | -10.948901 | -7.378651 | -1.750677 |
| 174 | 7 | 0 | -9.895154  | -0.866420 | 0.029606  |
| 175 | 1 | 0 | -10.907105 | -0.714928 | -0.032320 |
| 176 | 6 | 0 | -9.061310  | 0.186069  | -0.091858 |
| 177 | 8 | 0 | -7.830997  | 0.122979  | 0.072159  |
| 178 | 6 | 0 | -9.739026  | 1.511855  | -0.508834 |
| 179 | 7 | 0 | -9.177918  | 2.605653  | 0.298038  |
| 180 | 1 | 0 | -8.159433  | 2.708634  | 0.336168  |
| 181 | 1 | 0 | -8.322471  | -2.209414 | 0.253099  |
| 182 | 1 | 0 | -10.708033 | -5.222397 | -2.038360 |
| 183 | 1 | 0 | -10.812913 | 1.468257  | -0.302541 |
| 184 | 6 | 0 | -4.920481  | -1.372253 | 0.509774  |
| 185 | 7 | 0 | -4.418397  | -2.559361 | -0.198170 |
| 186 | 1 | 0 | -3.405111  | -2.677081 | -0.295669 |
| 187 | 6 | 0 | -5.241038  | -3.538471 | -0.627433 |
| 188 | 8 | 0 | -6.470867  | -3.538742 | -0.454772 |
| 189 | 6 | 0 | -4.549938  | -4.674354 | -1.417840 |
| 190 | 7 | 0 | -5.106501  | -5.965364 | -0.984988 |
| 191 | 1 | 0 | -6.123866  | -6.087468 | -1.009588 |
| 192 | 6 | 0 | -4.322178  | -7.012277 | -0.655632 |
| 193 | 8 | 0 | -3.079953  | -6.992534 | -0.694756 |
| 194 | 6 | 0 | -4.272463  | -0.111842 | -0.107762 |
| 195 | 8 | 0 | -3.056767  | -0.080566 | -0.365290 |
| 196 | 1 | 0 | -6.005743  | -1.342454 | 0.374038  |
| 197 | 1 | 0 | -3.478116  | -4.688315 | -1.198348 |
| 198 | 6 | 0 | -9.194443  | 4.561674  | 1.761816  |
| 199 | 6 | 0 | -9.957560  | 3.532219  | 0.894913  |
| 200 | 8 | 0 | -11.196181 | 3.557771  | 0.811837  |
| 201 | 7 | 0 | -9.747916  | 5.902588  | 1.518210  |
| 202 | 1 | 0 | -10.758716 | 6.036134  | 1.626297  |
| 203 | 6 | 0 | -8.959508  | 6.971396  | 1.281436  |
| 204 | 8 | 0 | -7.717741  | 6.926921  | 1.243041  |
| 205 | 6 | 0 | -9.714078  | 8.292830  | 1.001783  |
| 206 | 7 | 0 | -9.045150  | 9.390837  | 1.713036  |
| 207 | 1 | 0 | -8.046833  | 9.544654  | 1.550297  |
| 208 | 6 | 0 | -9.714242  | 10.237000 | 2.530449  |
| 209 | 8 | 0 | -10.938436 | 10.157844 | 2.741849  |
| 210 | 1 | 0 | -8.138716  | 4.585828  | 1.475282  |
| 211 | 1 | 0 | -10.735946 | 8.230905  | 1.389468  |
| 212 | 6 | 0 | -8.870188  | 11.304400 | 3.208166  |
| 213 | 1 | 0 | -7.828826  | 11.289720 | 2.878975  |

|     |   |   |            |            |           |
|-----|---|---|------------|------------|-----------|
| 214 | 1 | 0 | -9.315399  | 12.282817  | 2.999600  |
| 215 | 1 | 0 | -8.917354  | 11.144448  | 4.291060  |
| 216 | 6 | 0 | -4.289146  | 12.120391  | 2.184220  |
| 217 | 1 | 0 | -3.432887  | 12.796232  | 2.110439  |
| 218 | 1 | 0 | -5.205807  | 12.671793  | 1.951504  |
| 219 | 1 | 0 | -4.367275  | 11.756426  | 3.216995  |
| 220 | 6 | 0 | -9.622566  | -8.939095  | -1.072199 |
| 221 | 1 | 0 | -8.539360  | -8.954182  | -0.913581 |
| 222 | 6 | 0 | -5.081871  | -8.265361  | -0.159266 |
| 223 | 1 | 0 | -6.122356  | -8.231881  | -0.497824 |
| 224 | 1 | 0 | -3.467839  | -9.617032  | -0.622659 |
| 225 | 6 | 0 | -5.202519  | -10.404391 | -1.392600 |
| 226 | 6 | 0 | -4.416884  | -11.577804 | -1.955708 |
| 227 | 1 | 0 | -3.353548  | -11.529134 | -1.710447 |
| 228 | 1 | 0 | -4.848219  | -12.504510 | -1.562696 |
| 229 | 1 | 0 | -4.545606  | -11.589119 | -3.043603 |
| 230 | 8 | 0 | -6.436327  | -10.328506 | -1.541344 |
| 231 | 7 | 0 | -4.472387  | -9.466445  | -0.746082 |
| 232 | 6 | 0 | -10.012966 | -9.932454  | -2.190832 |
| 233 | 1 | 0 | -8.086406  | -10.646951 | -2.206634 |
| 234 | 6 | 0 | -9.249863  | -11.775184 | -3.609766 |
| 235 | 1 | 0 | -8.440394  | -12.508634 | -3.560414 |
| 236 | 1 | 0 | -10.207043 | -12.280034 | -3.447242 |
| 237 | 1 | 0 | -9.266673  | -11.332518 | -4.614512 |
| 238 | 8 | 0 | -11.163410 | -9.953997  | -2.663021 |
| 239 | 7 | 0 | -9.031909  | -10.767573 | -2.582454 |
| 240 | 6 | 0 | -10.314210 | -9.372926  | 0.197762  |
| 241 | 1 | 0 | -10.056877 | -8.688516  | 1.042178  |
| 242 | 1 | 0 | -11.425151 | -9.379835  | 0.070016  |
| 243 | 1 | 0 | -9.980777  | -10.405955 | 0.462935  |
| 244 | 6 | 0 | -5.060911  | -8.242910  | 1.351321  |
| 245 | 1 | 0 | -4.014226  | -8.266937  | 1.743373  |
| 246 | 1 | 0 | -5.556041  | -7.307848  | 1.711215  |
| 247 | 1 | 0 | -5.615329  | -9.119756  | 1.765547  |
| 248 | 6 | 0 | -4.740352  | -4.389474  | -2.889222 |
| 249 | 1 | 0 | -5.824765  | -4.355057  | -3.159166 |
| 250 | 1 | 0 | -4.279450  | -3.401322  | -3.134341 |
| 251 | 1 | 0 | -4.244899  | -5.175821  | -3.509018 |
| 252 | 6 | 0 | -9.116616  | -5.058300  | -3.447767 |
| 253 | 1 | 0 | -9.487019  | -4.100744  | -3.887957 |
| 254 | 1 | 0 | -7.999331  | -5.060298  | -3.488743 |
| 255 | 1 | 0 | -9.498159  | -5.905626  | -4.068608 |
| 256 | 6 | 0 | -9.764681  | -2.671626  | 1.752726  |

|     |   |   |            |           |           |
|-----|---|---|------------|-----------|-----------|
| 257 | 1 | 0 | -9.325706  | -1.982038 | 2.514080  |
| 258 | 1 | 0 | -10.872363 | -2.705992 | 1.900671  |
| 259 | 1 | 0 | -9.350120  | -3.695861 | 1.920196  |
| 260 | 6 | 0 | -4.618003  | -1.366051 | 1.989958  |
| 261 | 1 | 0 | -3.516415  | -1.381706 | 2.179717  |
| 262 | 1 | 0 | -5.046423  | -0.441029 | 2.448021  |
| 263 | 1 | 0 | -5.077227  | -2.254149 | 2.488302  |
| 264 | 6 | 0 | -9.537971  | 1.681504  | -1.996632 |
| 265 | 1 | 0 | -10.026866 | 2.620233  | -2.354065 |
| 266 | 1 | 0 | -8.451586  | 1.724878  | -2.257150 |
| 267 | 1 | 0 | -9.999402  | 0.815156  | -2.530875 |
| 268 | 6 | 0 | -5.100593  | 2.523672  | -2.213379 |
| 269 | 1 | 0 | -6.215894  | 2.539843  | -2.291012 |
| 270 | 1 | 0 | -4.706549  | 3.523215  | -2.520876 |
| 271 | 1 | 0 | -4.706321  | 1.753717  | -2.920212 |
| 272 | 6 | 0 | -9.296732  | 4.111208  | 3.200452  |
| 273 | 1 | 0 | -10.362215 | 4.062476  | 3.535769  |
| 274 | 1 | 0 | -8.843886  | 3.094413  | 3.300029  |
| 275 | 1 | 0 | -8.744842  | 4.812908  | 3.872011  |
| 276 | 6 | 0 | -4.167541  | 5.462815  | 2.644575  |
| 277 | 1 | 0 | -3.049603  | 5.461104  | 2.640025  |
| 278 | 1 | 0 | -4.520686  | 6.372330  | 3.189655  |
| 279 | 1 | 0 | -4.522722  | 4.558430  | 3.195750  |
| 280 | 6 | 0 | -9.771364  | 8.478488  | -0.496431 |
| 281 | 1 | 0 | -8.745794  | 8.541625  | -0.937097 |
| 282 | 1 | 0 | -10.303984 | 7.608955  | -0.953822 |
| 283 | 1 | 0 | -10.327425 | 9.411815  | -0.756246 |
| 284 | 6 | 0 | -5.477045  | 9.394656  | -1.376719 |
| 285 | 1 | 0 | -5.243113  | 8.632965  | -2.159504 |
| 286 | 1 | 0 | -6.583846  | 9.414433  | -1.217409 |
| 287 | 1 | 0 | -5.153673  | 10.397609 | -1.748320 |
| 288 | 1 | 0 | -13.110058 | 2.277658  | 0.252934  |
| 289 | 6 | 0 | 4.780106   | 5.601428  | 0.027396  |
| 290 | 7 | 0 | 5.199300   | 4.293349  | -0.498408 |
| 291 | 1 | 0 | 6.192529   | 4.144910  | -0.701250 |
| 292 | 6 | 0 | 4.337908   | 3.263577  | -0.627857 |
| 293 | 8 | 0 | 3.139666   | 3.313108  | -0.305970 |
| 294 | 6 | 0 | 4.935379   | 1.986796  | -1.264016 |
| 295 | 7 | 0 | 4.454331   | 0.818598  | -0.511504 |
| 296 | 1 | 0 | 3.443943   | 0.715269  | -0.369120 |
| 297 | 6 | 0 | 5.325703   | 6.706558  | -0.905701 |
| 298 | 8 | 0 | 6.505748   | 6.687143  | -1.294965 |
| 299 | 7 | 0 | 4.439447   | 7.675558  | -1.213037 |

|     |   |   |           |           |           |
|-----|---|---|-----------|-----------|-----------|
| 300 | 1 | 0 | 3.460761  | 7.570200  | -0.925487 |
| 301 | 6 | 0 | 4.800709  | 8.836705  | -2.041913 |
| 302 | 6 | 0 | 4.393315  | 10.126780 | -1.292661 |
| 303 | 8 | 0 | 3.233260  | 10.295517 | -0.878130 |
| 304 | 7 | 0 | 5.374231  | 11.039405 | -1.152119 |
| 305 | 1 | 0 | 6.325630  | 10.805304 | -1.451003 |
| 306 | 1 | 0 | 3.685799  | 5.617065  | 0.032708  |
| 307 | 1 | 0 | 5.886305  | 8.806413  | -2.180696 |
| 308 | 6 | 0 | 0.118372  | -2.124177 | 0.626060  |
| 309 | 6 | 0 | -0.481631 | -3.327655 | -0.137157 |
| 310 | 8 | 0 | -1.675444 | -3.334682 | -0.479217 |
| 311 | 7 | 0 | 0.372214  | -4.349857 | -0.350013 |
| 312 | 1 | 0 | 1.363664  | -4.231177 | -0.120087 |
| 313 | 6 | 0 | -0.049593 | -5.600039 | -1.000013 |
| 314 | 6 | 0 | 0.472009  | -6.789333 | -0.161583 |
| 315 | 8 | 0 | 1.649143  | -6.821684 | 0.235247  |
| 316 | 7 | 0 | -0.430200 | -7.767731 | 0.058733  |
| 317 | 1 | 0 | -1.405499 | -7.624538 | -0.224178 |
| 318 | 7 | 0 | -0.341358 | -0.882017 | -0.012233 |
| 319 | 1 | 0 | -1.348770 | -0.748923 | -0.151029 |
| 320 | 6 | 0 | 0.504464  | 0.120138  | -0.323749 |
| 321 | 8 | 0 | 1.725734  | 0.097950  | -0.093094 |
| 322 | 6 | 0 | -0.142792 | 1.320384  | -1.052247 |
| 323 | 7 | 0 | 0.377529  | 2.565179  | -0.466703 |
| 324 | 1 | 0 | 1.392917  | 2.681340  | -0.395498 |
| 325 | 1 | 0 | 1.210419  | -2.143046 | 0.561684  |
| 326 | 1 | 0 | -1.143794 | -5.604046 | -1.024302 |
| 327 | 1 | 0 | -1.226685 | 1.313378  | -0.902185 |
| 328 | 6 | 0 | 4.608888  | -1.258844 | 0.762268  |
| 329 | 7 | 0 | 5.116812  | -2.567687 | 0.323393  |
| 330 | 1 | 0 | 6.130995  | -2.703349 | 0.275305  |
| 331 | 6 | 0 | 4.298652  | -3.616887 | 0.100032  |
| 332 | 8 | 0 | 3.066454  | -3.583226 | 0.250212  |
| 333 | 6 | 0 | 5.000192  | -4.892670 | -0.422889 |
| 334 | 7 | 0 | 4.427954  | -6.066173 | 0.254463  |
| 335 | 1 | 0 | 3.410813  | -6.192436 | 0.232508  |
| 336 | 6 | 0 | 5.198738  | -7.021093 | 0.813587  |
| 337 | 8 | 0 | 6.441973  | -7.007873 | 0.802321  |
| 338 | 6 | 0 | 5.283018  | -0.153721 | -0.082953 |
| 339 | 8 | 0 | 6.507495  | -0.172561 | -0.297414 |
| 340 | 1 | 0 | 3.527272  | -1.252684 | 0.597339  |
| 341 | 1 | 0 | 6.066940  | -4.861766 | -0.181215 |
| 342 | 6 | 0 | 0.285452  | 4.789983  | 0.540011  |

|     |   |   |           |            |           |
|-----|---|---|-----------|------------|-----------|
| 343 | 6 | 0 | -0.429672 | 3.592211   | -0.128583 |
| 344 | 8 | 0 | -1.661247 | 3.590767   | -0.287566 |
| 345 | 7 | 0 | -0.261530 | 6.042264   | -0.003667 |
| 346 | 1 | 0 | -1.276227 | 6.184826   | 0.029363  |
| 347 | 6 | 0 | 0.532847  | 7.043016   | -0.437129 |
| 348 | 8 | 0 | 1.775090  | 7.005024   | -0.416047 |
| 349 | 6 | 0 | -0.214319 | 8.262165   | -1.027771 |
| 350 | 7 | 0 | 0.415171  | 9.496717   | -0.539277 |
| 351 | 1 | 0 | 1.420813  | 9.622642   | -0.679962 |
| 352 | 6 | 0 | -0.296967 | 10.490776  | 0.040409  |
| 353 | 8 | 0 | -1.530363 | 10.444032  | 0.203105  |
| 354 | 1 | 0 | 1.353789  | 4.769347   | 0.304409  |
| 355 | 1 | 0 | -1.253228 | 8.270146   | -0.682793 |
| 356 | 6 | 0 | 0.509784  | 11.691253  | 0.508846  |
| 357 | 1 | 0 | 1.569205  | 11.611585  | 0.254761  |
| 358 | 1 | 0 | 0.084059  | 12.593188  | 0.056682  |
| 359 | 1 | 0 | 0.396151  | 11.781015  | 1.594817  |
| 360 | 6 | 0 | 5.141366  | 12.314009  | -0.489152 |
| 361 | 1 | 0 | 4.204860  | 12.758038  | -0.840692 |
| 362 | 1 | 0 | 5.072215  | 12.197142  | 0.600366  |
| 363 | 1 | 0 | 5.970516  | 12.988070  | -0.720872 |
| 364 | 6 | 0 | -0.090037 | -8.994915  | 0.796248  |
| 365 | 1 | 0 | 0.994816  | -8.989071  | 0.943571  |
| 366 | 6 | 0 | 4.421358  | -8.144890  | 1.538815  |
| 367 | 1 | 0 | 3.390128  | -8.182663  | 1.173908  |
| 368 | 1 | 0 | 6.042743  | -9.556961  | 1.394810  |
| 369 | 6 | 0 | 4.318626  | -10.500039 | 0.792960  |
| 370 | 6 | 0 | 5.114893  | -11.761047 | 0.497585  |
| 371 | 1 | 0 | 6.172541  | -11.660586 | 0.751760  |
| 372 | 1 | 0 | 4.672505  | -12.590661 | 1.058827  |
| 373 | 1 | 0 | 5.012459  | -11.991974 | -0.568499 |
| 374 | 8 | 0 | 3.086109  | -10.465389 | 0.622650  |
| 375 | 7 | 0 | 5.040188  | -9.440533  | 1.228395  |
| 376 | 6 | 0 | -0.507103 | -10.217772 | -0.052929 |
| 377 | 1 | 0 | 1.417501  | -10.928917 | 0.060263  |
| 378 | 6 | 0 | 0.222579  | -12.345081 | -1.019166 |
| 379 | 1 | 0 | 0.172240  | -12.147958 | -2.098107 |
| 380 | 1 | 0 | 1.037294  | -13.048197 | -0.825707 |
| 381 | 1 | 0 | -0.726310 | -12.796972 | -0.714141 |
| 382 | 8 | 0 | -1.667288 | -10.341698 | -0.482761 |
| 383 | 7 | 0 | 0.465413  | -11.126632 | -0.261039 |
| 384 | 6 | 0 | -0.771694 | -9.105606  | 2.138789  |
| 385 | 1 | 0 | -0.493186 | -8.246465  | 2.796019  |

|     |   |   |           |            |           |
|-----|---|---|-----------|------------|-----------|
| 386 | 1 | 0 | -1.884200 | -9.122590  | 2.025882  |
| 387 | 1 | 0 | -0.450747 | -10.053038 | 2.636743  |
| 388 | 6 | 0 | 4.402500  | -7.809614  | 3.011989  |
| 389 | 1 | 0 | 5.438250  | -7.747501  | 3.427956  |
| 390 | 1 | 0 | 3.899218  | -6.822334  | 3.157018  |
| 391 | 1 | 0 | 3.835937  | -8.583813  | 3.584235  |
| 392 | 6 | 0 | 4.842953  | -4.918009  | -1.925241 |
| 393 | 1 | 0 | 3.764776  | -4.942631  | -2.220261 |
| 394 | 1 | 0 | 5.311306  | -4.000738  | -2.359046 |
| 395 | 1 | 0 | 5.349906  | -5.814331  | -2.358364 |
| 396 | 6 | 0 | 0.470353  | -5.765094  | -2.408467 |
| 397 | 1 | 0 | 0.109215  | -4.933161  | -3.060671 |
| 398 | 1 | 0 | 1.588157  | -5.774927  | -2.429716 |
| 399 | 1 | 0 | 0.096959  | -6.731940  | -2.826501 |
| 400 | 6 | 0 | -0.284286 | -2.253110  | 2.076425  |
| 401 | 1 | 0 | 0.136625  | -1.410785  | 2.677460  |
| 402 | 1 | 0 | -1.396413 | -2.250619  | 2.190986  |
| 403 | 1 | 0 | 0.114662  | -3.214212  | 2.483912  |
| 404 | 6 | 0 | 4.878894  | -0.952214  | 2.216840  |
| 405 | 1 | 0 | 5.975910  | -0.935665  | 2.431591  |
| 406 | 1 | 0 | 4.450834  | 0.049547   | 2.466299  |
| 407 | 1 | 0 | 4.399098  | -1.716869  | 2.874900  |
| 408 | 6 | 0 | 0.143826  | 1.170502   | -2.528024 |
| 409 | 1 | 0 | -0.317529 | 2.008808   | -3.104533 |
| 410 | 1 | 0 | 1.243514  | 1.162934   | -2.729401 |
| 411 | 1 | 0 | -0.292583 | 0.207764   | -2.890825 |
| 412 | 6 | 0 | 4.548466  | 1.976096   | -2.724150 |
| 413 | 1 | 0 | 3.437489  | 1.969015   | -2.849809 |
| 414 | 1 | 0 | 4.958193  | 2.890542   | -3.218960 |
| 415 | 1 | 0 | 4.969536  | 1.076667   | -3.235650 |
| 416 | 6 | 0 | 0.116733  | 4.647406   | 2.034640  |
| 417 | 1 | 0 | -0.963286 | 4.649319   | 2.323467  |
| 418 | 1 | 0 | 0.573172  | 3.682325   | 2.365137  |
| 419 | 1 | 0 | 0.628785  | 5.483851   | 2.569555  |
| 420 | 6 | 0 | 5.277649  | 5.890006   | 1.424058  |
| 421 | 1 | 0 | 6.394919  | 5.894935   | 1.464008  |
| 422 | 1 | 0 | 4.904668  | 6.893022   | 1.746366  |
| 423 | 1 | 0 | 4.899211  | 5.122863   | 2.142506  |
| 424 | 6 | 0 | -0.200912 | 8.121139   | -2.531905 |
| 425 | 1 | 0 | 0.844186  | 8.101939   | -2.928551 |
| 426 | 1 | 0 | -0.708411 | 7.166643   | -2.815391 |
| 427 | 1 | 0 | -0.747200 | 8.969346   | -3.011407 |
| 428 | 6 | 0 | 4.128189  | 8.850878   | -3.393455 |

|     |   |   |           |           |           |
|-----|---|---|-----------|-----------|-----------|
| 429 | 1 | 0 | 4.401116  | 7.940767  | -3.980704 |
| 430 | 1 | 0 | 3.015259  | 8.888146  | -3.289755 |
| 431 | 1 | 0 | 4.462593  | 9.753683  | -3.960651 |
| 432 | 6 | 0 | 9.664211  | -1.959302 | 1.141272  |
| 433 | 6 | 0 | 9.061690  | -3.291307 | 0.636385  |
| 434 | 8 | 0 | 7.871832  | -3.362969 | 0.290419  |
| 435 | 7 | 0 | 9.909750  | -4.341090 | 0.648753  |
| 436 | 1 | 0 | 10.899097 | -4.183020 | 0.860187  |
| 437 | 6 | 0 | 9.482663  | -5.696677 | 0.269086  |
| 438 | 6 | 0 | 9.976620  | -6.686119 | 1.348584  |
| 439 | 8 | 0 | 11.149031 | -6.643605 | 1.760955  |
| 440 | 7 | 0 | 9.060409  | -7.584561 | 1.761215  |
| 441 | 1 | 0 | 8.092050  | -7.503218 | 1.431772  |
| 442 | 7 | 0 | 9.220038  | -0.873338 | 0.255347  |
| 443 | 1 | 0 | 8.214825  | -0.771416 | 0.078420  |
| 444 | 6 | 0 | 10.073699 | 0.042535  | -0.244787 |
| 445 | 8 | 0 | 11.292361 | 0.068420  | 0.000215  |
| 446 | 6 | 0 | 9.435544  | 1.065141  | -1.213105 |
| 447 | 7 | 0 | 9.939184  | 2.407704  | -0.884922 |
| 448 | 1 | 0 | 10.952133 | 2.541428  | -0.815885 |
| 449 | 1 | 0 | 10.756767 | -1.996619 | 1.094984  |
| 450 | 1 | 0 | 8.389030  | -5.696123 | 0.227747  |
| 451 | 1 | 0 | 8.349140  | 1.080484  | -1.083204 |
| 452 | 6 | 0 | 9.818012  | 4.796481  | -0.378190 |
| 453 | 6 | 0 | 9.122539  | 3.478464  | -0.793702 |
| 454 | 8 | 0 | 7.895698  | 3.435793  | -0.979761 |
| 455 | 7 | 0 | 9.274558  | 5.901743  | -1.182164 |
| 456 | 1 | 0 | 8.258791  | 6.040560  | -1.195874 |
| 457 | 6 | 0 | 10.069875 | 6.791496  | -1.810868 |
| 458 | 8 | 0 | 11.312295 | 6.765754  | -1.767957 |
| 459 | 6 | 0 | 9.325466  | 7.850214  | -2.658444 |
| 460 | 7 | 0 | 9.940229  | 9.166205  | -2.437729 |
| 461 | 1 | 0 | 10.946644 | 9.267384  | -2.589641 |
| 462 | 6 | 0 | 9.212562  | 10.258823 | -2.107594 |
| 463 | 8 | 0 | 7.976387  | 10.239392 | -1.962312 |
| 464 | 1 | 0 | 10.890758 | 4.737250  | -0.585545 |
| 465 | 1 | 0 | 8.281500  | 7.922103  | -2.337403 |
| 466 | 6 | 0 | 10.005320 | 11.539663 | -1.902093 |
| 467 | 1 | 0 | 11.069366 | 11.415609 | -2.115696 |
| 468 | 1 | 0 | 9.583361  | 12.316351 | -2.548453 |
| 469 | 1 | 0 | 9.872512  | 11.865512 | -0.864572 |
| 470 | 6 | 0 | 9.375460  | -8.627521 | 2.750502  |
| 471 | 1 | 0 | 10.454258 | -8.581661 | 2.930662  |

|     |   |   |           |            |           |
|-----|---|---|-----------|------------|-----------|
| 472 | 6 | 0 | 8.990086  | -10.006348 | 2.165229  |
| 473 | 1 | 0 | 10.902936 | -10.664308 | 2.517950  |
| 474 | 6 | 0 | 9.757716  | -12.288937 | 1.715319  |
| 475 | 1 | 0 | 10.534626 | -12.937367 | 2.129702  |
| 476 | 1 | 0 | 8.775337  | -12.652669 | 2.030888  |
| 477 | 1 | 0 | 9.801541  | -12.338398 | 0.619309  |
| 478 | 8 | 0 | 7.849845  | -10.225428 | 1.722245  |
| 479 | 7 | 0 | 9.968095  | -10.933119 | 2.201261  |
| 480 | 6 | 0 | 8.646798  | -8.459294  | 4.061931  |
| 481 | 1 | 0 | 8.899637  | -7.478426  | 4.532671  |
| 482 | 1 | 0 | 7.539026  | -8.510292  | 3.917001  |
| 483 | 1 | 0 | 8.951729  | -9.277616  | 4.759076  |
| 484 | 6 | 0 | 10.020670 | -6.159495  | -1.064026 |
| 485 | 1 | 0 | 9.681221  | -5.479194  | -1.882506 |
| 486 | 1 | 0 | 11.138366 | -6.186195  | -1.063494 |
| 487 | 1 | 0 | 9.639316  | -7.188369  | -1.276312 |
| 488 | 6 | 0 | 9.245500  | -1.783986  | 2.582271  |
| 489 | 1 | 0 | 9.668805  | -0.839284  | 3.002152  |
| 490 | 1 | 0 | 8.132287  | -1.749014  | 2.680288  |
| 491 | 1 | 0 | 9.630236  | -2.643706  | 3.183677  |
| 492 | 6 | 0 | 9.749119  | 0.619822   | -2.622350 |
| 493 | 1 | 0 | 9.295079  | 1.319694   | -3.365336 |
| 494 | 1 | 0 | 10.852216 | 0.579103   | -2.799500 |
| 495 | 1 | 0 | 9.322694  | -0.399722  | -2.788656 |
| 496 | 6 | 0 | 9.620934  | 4.969010   | 1.109696  |
| 497 | 1 | 0 | 8.535474  | 5.026143   | 1.371573  |
| 498 | 1 | 0 | 10.071887 | 4.096910   | 1.643554  |
| 499 | 1 | 0 | 10.121553 | 5.901623   | 1.466955  |
| 500 | 6 | 0 | 9.362292  | 7.389948   | -4.097121 |
| 501 | 1 | 0 | 10.413248 | 7.295102   | -4.466398 |
| 502 | 1 | 0 | 8.864126  | 6.392688   | -4.176311 |
| 503 | 1 | 0 | 8.818646  | 8.111049   | -4.754631 |
| 504 | 1 | 0 | 6.026814  | 2.001725   | -1.188788 |
| 505 | 6 | 0 | 14.292585 | 5.498044   | -1.014855 |
| 506 | 7 | 0 | 14.742375 | 4.117361   | -1.256667 |
| 507 | 1 | 0 | 15.732034 | 3.959720   | -1.457754 |
| 508 | 6 | 0 | 13.903221 | 3.065668   | -1.153955 |
| 509 | 8 | 0 | 12.709093 | 3.160578   | -0.829898 |
| 510 | 6 | 0 | 14.517726 | 1.694600   | -1.520235 |
| 511 | 7 | 0 | 14.037297 | 0.693424   | -0.556348 |
| 512 | 1 | 0 | 13.027803 | 0.633691   | -0.384942 |
| 513 | 6 | 0 | 14.853334 | 6.394125   | -2.141005 |
| 514 | 8 | 0 | 16.043079 | 6.305081   | -2.487301 |



|     |   |   |           |            |           |
|-----|---|---|-----------|------------|-----------|
| 515 | 7 | 0 | 13.971968 | 7.271243   | -2.665898 |
| 516 | 1 | 0 | 12.987249 | 7.225955   | -2.381316 |
| 517 | 6 | 0 | 14.348820 | 8.225188   | -3.721122 |
| 518 | 6 | 0 | 13.917809 | 9.647154   | -3.291170 |
| 519 | 8 | 0 | 12.753863 | 9.878577   | -2.922106 |
| 520 | 7 | 0 | 14.870284 | 10.594851  | -3.376571 |
| 521 | 1 | 0 | 15.833710 | 10.349676  | -3.614144 |
| 522 | 1 | 0 | 13.198698 | 5.496414   | -1.039627 |
| 523 | 1 | 0 | 15.437652 | 8.164792   | -3.829147 |
| 524 | 6 | 0 | 14.185729 | -1.117937  | 1.072332  |
| 525 | 7 | 0 | 14.679530 | -2.495046  | 0.910193  |
| 526 | 1 | 0 | 15.689700 | -2.643549  | 0.860064  |
| 527 | 6 | 0 | 13.848974 | -3.558697  | 0.947456  |
| 528 | 8 | 0 | 12.620465 | -3.475445  | 1.102796  |
| 529 | 6 | 0 | 14.526336 | -4.934487  | 0.735619  |
| 530 | 7 | 0 | 13.914702 | -5.908448  | 1.652880  |
| 531 | 1 | 0 | 12.895860 | -6.026020  | 1.628630  |
| 532 | 6 | 0 | 14.643296 | -6.681732  | 2.481339  |
| 533 | 8 | 0 | 15.886257 | -6.672800  | 2.530317  |
| 534 | 6 | 0 | 14.858079 | -0.210627  | 0.016933  |
| 535 | 8 | 0 | 16.074073 | -0.302487  | -0.221256 |
| 536 | 1 | 0 | 13.102472 | -1.137106  | 0.918423  |
| 537 | 1 | 0 | 15.590990 | -4.873293  | 0.981442  |
| 538 | 6 | 0 | 14.594810 | 11.985246  | -3.040107 |
| 539 | 1 | 0 | 13.700224 | 12.336864  | -3.564543 |
| 540 | 1 | 0 | 14.427223 | 12.112128  | -1.963076 |
| 541 | 1 | 0 | 15.454491 | 12.588189  | -3.341949 |
| 542 | 6 | 0 | 13.817170 | -7.573793  | 3.438206  |
| 543 | 1 | 0 | 12.812598 | -7.726869  | 3.032139  |
| 544 | 1 | 0 | 15.431226 | -8.943181  | 3.822696  |
| 545 | 6 | 0 | 13.765667 | -10.046826 | 3.346079  |
| 546 | 6 | 0 | 14.578622 | -11.325184 | 3.476329  |
| 547 | 1 | 0 | 15.610954 | -11.139918 | 3.781920  |
| 548 | 1 | 0 | 14.086228 | -11.977683 | 4.204686  |
| 549 | 1 | 0 | 14.568256 | -11.841446 | 2.510278  |
| 550 | 8 | 0 | 12.555986 | -10.082940 | 3.062149  |
| 551 | 7 | 0 | 14.451100 | -8.894578  | 3.543205  |
| 552 | 6 | 0 | 13.700228 | -6.842750  | 4.755383  |
| 553 | 1 | 0 | 14.705503 | -6.647724  | 5.203658  |
| 554 | 1 | 0 | 13.187399 | -5.863990  | 4.587128  |
| 555 | 1 | 0 | 13.096827 | -7.437873  | 5.483206  |
| 556 | 6 | 0 | 14.386866 | -5.299498  | -0.723010 |
| 557 | 1 | 0 | 13.312164 | -5.367564  | -1.023917 |

|     |   |   |           |           |           |
|-----|---|---|-----------|-----------|-----------|
| 558 | 1 | 0 | 14.883676 | -4.516217 | -1.346569 |
| 559 | 1 | 0 | 14.875876 | -6.282161 | -0.931240 |
| 560 | 6 | 0 | 14.470836 | -0.523569 | 2.432170  |
| 561 | 1 | 0 | 15.569489 | -0.471161 | 2.631011  |
| 562 | 1 | 0 | 14.049792 | 0.510802  | 2.476211  |
| 563 | 1 | 0 | 13.992673 | -1.134827 | 3.235780  |
| 564 | 6 | 0 | 14.151100 | 1.393667  | -2.954527 |
| 565 | 1 | 0 | 13.042069 | 1.350639  | -3.089664 |
| 566 | 1 | 0 | 14.560758 | 2.196609  | -3.615169 |
| 567 | 1 | 0 | 14.585617 | 0.415196  | -3.273708 |
| 568 | 6 | 0 | 14.748463 | 6.072014  | 0.305497  |
| 569 | 1 | 0 | 15.863386 | 6.113195  | 0.367658  |
| 570 | 1 | 0 | 14.346025 | 7.109266  | 0.412222  |
| 571 | 1 | 0 | 14.366987 | 5.454648  | 1.154839  |
| 572 | 6 | 0 | 13.710486 | 7.934454  | -5.058514 |
| 573 | 1 | 0 | 14.002417 | 6.920354  | -5.424722 |
| 574 | 1 | 0 | 12.595096 | 7.981379  | -4.990938 |
| 575 | 1 | 0 | 14.053101 | 8.694210  | -5.802888 |
| 576 | 6 | 0 | 19.433254 | -1.794478 | 1.370136  |
| 577 | 6 | 0 | 18.703214 | -3.155120 | 1.293920  |
| 578 | 8 | 0 | 17.514738 | -3.231049 | 0.955884  |
| 579 | 7 | 0 | 19.447252 | -4.227904 | 1.649899  |
| 580 | 1 | 0 | 20.395671 | -4.103733 | 1.988233  |
| 581 | 6 | 0 | 18.885275 | -5.578404 | 1.794463  |
| 582 | 6 | 0 | 19.342123 | -6.136112 | 3.163976  |
| 583 | 8 | 0 | 20.463616 | -5.879650 | 3.614200  |
| 584 | 7 | 0 | 18.423231 | -6.934430 | 3.765945  |
| 585 | 1 | 0 | 17.472880 | -6.980583 | 3.383018  |
| 586 | 7 | 0 | 18.864221 | -0.908898 | 0.352397  |
| 587 | 1 | 0 | 17.850498 | -0.922049 | 0.210219  |
| 588 | 6 | 0 | 19.608256 | 0.047197  | -0.256948 |
| 589 | 8 | 0 | 20.801981 | 0.268174  | -0.026680 |
| 590 | 6 | 0 | 18.844670 | 0.844631  | -1.342652 |
| 591 | 7 | 0 | 19.476953 | 2.166424  | -1.445436 |
| 592 | 1 | 0 | 20.476604 | 2.183412  | -1.266194 |
| 593 | 1 | 0 | 20.498285 | -1.915923 | 1.133975  |
| 594 | 1 | 0 | 17.795281 | -5.489537 | 1.764209  |
| 595 | 1 | 0 | 17.802279 | 0.984346  | -1.041733 |
| 596 | 6 | 0 | 19.624544 | 4.606286  | -1.482647 |
| 597 | 6 | 0 | 18.775668 | 3.316339  | -1.553263 |
| 598 | 8 | 0 | 17.544020 | 3.358362  | -1.676662 |
| 599 | 7 | 0 | 18.902485 | 5.673983  | -2.179277 |
| 600 | 1 | 0 | 17.879333 | 5.643516  | -2.197827 |

|     |   |   |           |            |           |
|-----|---|---|-----------|------------|-----------|
| 601 | 6 | 0 | 19.553030 | 6.751586   | -2.677918 |
| 602 | 8 | 0 | 20.775423 | 6.926121   | -2.601380 |
| 603 | 6 | 0 | 18.644688 | 7.781949   | -3.394609 |
| 604 | 7 | 0 | 19.436893 | 9.005210   | -3.545283 |
| 605 | 1 | 0 | 20.437708 | 8.879000   | -3.423142 |
| 606 | 6 | 0 | 18.884743 | 10.217165  | -3.767545 |
| 607 | 8 | 0 | 17.659294 | 10.388076  | -3.885675 |
| 608 | 1 | 0 | 20.577776 | 4.454218   | -2.006680 |
| 609 | 1 | 0 | 17.775509 | 7.996110   | -2.762398 |
| 610 | 6 | 0 | 19.849965 | 11.388196  | -3.862026 |
| 611 | 1 | 0 | 20.896239 | 11.098331  | -3.726956 |
| 612 | 1 | 0 | 19.731477 | 11.861707  | -4.841945 |
| 613 | 1 | 0 | 19.579736 | 12.128287  | -3.102083 |
| 614 | 6 | 0 | 18.690568 | -7.576775  | 5.055702  |
| 615 | 1 | 0 | 19.758969 | -7.425931  | 5.254180  |
| 616 | 6 | 0 | 18.346709 | -9.079341  | 4.938102  |
| 617 | 1 | 0 | 20.229752 | -9.533853  | 5.571646  |
| 618 | 6 | 0 | 19.195531 | -11.381097 | 5.302391  |
| 619 | 1 | 0 | 19.595665 | -11.813820 | 6.225398  |
| 620 | 1 | 0 | 18.134120 | -11.622524 | 5.222048  |
| 621 | 1 | 0 | 19.721739 | -11.818307 | 4.444612  |
| 622 | 8 | 0 | 17.241072 | -9.461875  | 4.537377  |
| 623 | 7 | 0 | 19.332076 | -9.930095  | 5.327936  |
| 624 | 6 | 0 | 17.898836 | -7.010636  | 6.210478  |
| 625 | 1 | 0 | 18.125181 | -5.925336  | 6.348350  |
| 626 | 1 | 0 | 16.799508 | -7.126446  | 6.040619  |
| 627 | 1 | 0 | 18.171814 | -7.552846  | 7.148460  |
| 628 | 6 | 0 | 19.322270 | -6.544382  | 0.720405  |
| 629 | 1 | 0 | 19.031112 | -6.167124  | -0.290212 |
| 630 | 1 | 0 | 20.428509 | -6.700196  | 0.735445  |
| 631 | 1 | 0 | 18.818972 | -7.528074  | 0.889845  |
| 632 | 6 | 0 | 19.325126 | -1.281046  | 2.788110  |
| 633 | 1 | 0 | 19.853914 | -0.300805  | 2.884610  |
| 634 | 1 | 0 | 18.258680 | -1.139289  | 3.090475  |
| 635 | 1 | 0 | 19.801333 | -2.009972  | 3.488344  |
| 636 | 6 | 0 | 18.865707 | 0.048063   | -2.624916 |
| 637 | 1 | 0 | 18.363164 | 0.614334   | -3.446803 |
| 638 | 1 | 0 | 19.909649 | -0.187759  | -2.944798 |
| 639 | 1 | 0 | 18.312227 | -0.910343  | -2.466459 |
| 640 | 6 | 0 | 19.940023 | 4.898701   | -0.033320 |
| 641 | 1 | 0 | 19.009717 | 5.026538   | 0.571356  |
| 642 | 1 | 0 | 20.535108 | 4.058294   | 0.400246  |
| 643 | 1 | 0 | 20.545369 | 5.836209   | 0.043635  |

|     |   |   |           |          |           |
|-----|---|---|-----------|----------|-----------|
| 644 | 6 | 0 | 18.133611 | 7.199781 | -4.689838 |
| 645 | 1 | 0 | 18.964729 | 6.809633 | -5.324644 |
| 646 | 1 | 0 | 17.424448 | 6.364703 | -4.460288 |
| 647 | 1 | 0 | 17.578869 | 7.979764 | -5.268902 |
| 648 | 1 | 0 | 15.608432 | 1.735778 | -1.441202 |

AP PI (Ac-AAAAAA-NHMe)<sub>10</sub>

|    |   |   |            |            |           |
|----|---|---|------------|------------|-----------|
| 1  | 6 | 0 | -16.569690 | -4.932412  | -3.146016 |
| 2  | 7 | 0 | -16.229452 | -3.995189  | -2.064071 |
| 3  | 1 | 0 | -15.263022 | -3.981804  | -1.724438 |
| 4  | 6 | 0 | -17.107157 | -3.085870  | -1.589731 |
| 5  | 8 | 0 | -18.262799 | -2.934928  | -2.017837 |
| 6  | 6 | 0 | -16.589292 | -2.252211  | -0.394125 |
| 7  | 7 | 0 | -17.040569 | -0.860022  | -0.546644 |
| 8  | 1 | 0 | -18.032112 | -0.691594  | -0.735889 |
| 9  | 6 | 0 | -16.038535 | -6.335156  | -2.766539 |
| 10 | 8 | 0 | -14.900713 | -6.477112  | -2.287449 |
| 11 | 7 | 0 | -16.880234 | -7.355131  | -3.034057 |
| 12 | 1 | 0 | -17.837943 | -7.148764  | -3.337909 |
| 13 | 6 | 0 | -16.514276 | -8.757594  | -2.773922 |
| 14 | 6 | 0 | -16.882161 | -9.608000  | -4.011805 |
| 15 | 8 | 0 | -18.027499 | -9.589392  | -4.491403 |
| 16 | 7 | 0 | -15.882620 | -10.374476 | -4.492854 |
| 17 | 1 | 0 | -14.945308 | -10.285841 | -4.090177 |
| 18 | 1 | 0 | -17.659901 | -4.953469  | -3.238107 |
| 19 | 1 | 0 | -15.432967 | -8.781385  | -2.605787 |
| 20 | 6 | 0 | -21.272195 | 2.264689   | -0.030132 |
| 21 | 6 | 0 | -21.926333 | 2.837972   | 1.250258  |
| 22 | 8 | 0 | -23.055800 | 2.480722   | 1.602393  |
| 23 | 7 | 0 | -21.173472 | 3.768663   | 1.885958  |
| 24 | 1 | 0 | -20.191822 | 3.888744   | 1.622297  |
| 25 | 6 | 0 | -21.650678 | 4.457835   | 3.086263  |
| 26 | 6 | 0 | -20.983876 | 5.851848   | 3.139151  |
| 27 | 8 | 0 | -19.868468 | 6.050296   | 2.637744  |
| 28 | 7 | 0 | -21.691644 | 6.802689   | 3.785822  |
| 29 | 1 | 0 | -22.555440 | 6.565876   | 4.265242  |
| 30 | 7 | 0 | -21.796892 | 0.905887   | -0.223439 |
| 31 | 1 | 0 | -22.760514 | 0.765351   | 0.063744  |
| 32 | 6 | 0 | -21.017712 | -0.143632  | -0.563213 |
| 33 | 8 | 0 | -19.811886 | -0.038257  | -0.831093 |
| 34 | 6 | 0 | -21.721331 | -1.519881  | -0.568110 |
| 35 | 7 | 0 | -21.108629 | -2.343132  | -1.612657 |
| 36 | 1 | 0 | -20.090061 | -2.324956  | -1.705570 |
| 37 | 1 | 0 | -20.187566 | 2.197008   | 0.097947  |
| 38 | 1 | 0 | -22.739792 | 4.559407   | 2.994181  |
| 39 | 1 | 0 | -22.782419 | -1.410634  | -0.826106 |
| 40 | 6 | 0 | -16.848805 | 1.580151   | -0.572440 |
| 41 | 7 | 0 | -16.368279 | 2.498651   | 0.470666  |

|    |   |   |            |            |           |
|----|---|---|------------|------------|-----------|
| 42 | 1 | 0 | -15.359001 | 2.554845   | 0.637823  |
| 43 | 6 | 0 | -17.192644 | 3.329720   | 1.144616  |
| 44 | 8 | 0 | -18.413821 | 3.421714   | 0.939574  |
| 45 | 6 | 0 | -16.508373 | 4.139074   | 2.272539  |
| 46 | 7 | 0 | -17.037694 | 5.511763   | 2.286355  |
| 47 | 1 | 0 | -18.052143 | 5.634549   | 2.332653  |
| 48 | 6 | 0 | -16.231528 | 6.590854   | 2.376895  |
| 49 | 8 | 0 | -14.991520 | 6.531046   | 2.419709  |
| 50 | 6 | 0 | -16.217763 | 0.187193   | -0.333884 |
| 51 | 8 | 0 | -15.024359 | 0.077761   | -0.005991 |
| 52 | 1 | 0 | -17.938292 | 1.520360   | -0.486748 |
| 53 | 1 | 0 | -15.431785 | 4.204705   | 2.088763  |
| 54 | 6 | 0 | -21.015967 | -3.978599  | -3.418427 |
| 55 | 6 | 0 | -21.824389 | -3.263271  | -2.309676 |
| 56 | 8 | 0 | -23.023590 | -3.501546  | -2.137069 |
| 57 | 7 | 0 | -21.531952 | -5.348330  | -3.543861 |
| 58 | 1 | 0 | -22.538616 | -5.455455  | -3.486863 |
| 59 | 6 | 0 | -20.732290 | -6.434818  | -3.630289 |
| 60 | 8 | 0 | -19.494422 | -6.361561  | -3.669254 |
| 61 | 6 | 0 | -21.458526 | -7.801173  | -3.642109 |
| 62 | 7 | 0 | -20.827746 | -8.690053  | -4.615631 |
| 63 | 1 | 0 | -19.846067 | -8.941366  | -4.491739 |
| 64 | 6 | 0 | -21.492743 | -9.076931  | -5.747088 |
| 65 | 8 | 0 | -22.658975 | -8.755432  | -5.993255 |
| 66 | 1 | 0 | -19.960448 | -4.045915  | -3.137894 |
| 67 | 1 | 0 | -22.494705 | -7.676624  | -3.982052 |
| 68 | 6 | 0 | -20.681748 | -9.951403  | -6.695050 |
| 69 | 1 | 0 | -19.663271 | -10.131017 | -6.340565 |
| 70 | 1 | 0 | -21.206036 | -10.904798 | -6.820123 |
| 71 | 1 | 0 | -20.652395 | -9.462849  | -7.674566 |
| 72 | 6 | 0 | -16.076928 | -11.257330 | -5.633256 |
| 73 | 1 | 0 | -17.060524 | -11.732169 | -5.574119 |
| 74 | 1 | 0 | -16.021183 | -10.711361 | -6.584562 |
| 75 | 1 | 0 | -15.300068 | -12.027325 | -5.622467 |
| 76 | 6 | 0 | -21.142362 | 8.126350   | 4.114032  |
| 77 | 1 | 0 | -20.059923 | 8.092955   | 3.957626  |
| 78 | 6 | 0 | -16.959851 | 7.958705   | 2.378639  |
| 79 | 1 | 0 | -17.990502 | 7.832219   | 2.725360  |
| 80 | 1 | 0 | -15.302050 | 9.079814   | 3.173967  |
| 81 | 6 | 0 | -16.931409 | 9.427226   | 4.373427  |
| 82 | 6 | 0 | -16.078066 | 10.317439  | 5.262583  |
| 83 | 1 | 0 | -15.058364 | 10.432920  | 4.888680  |
| 84 | 1 | 0 | -16.562421 | 11.296522  | 5.339325  |

|     |   |   |            |           |           |
|-----|---|---|------------|-----------|-----------|
| 85  | 1 | 0 | -16.055241 | 9.881195  | 6.267312  |
| 86  | 8 | 0 | -18.136164 | 9.236517  | 4.625812  |
| 87  | 7 | 0 | -16.291923 | 8.866042  | 3.320793  |
| 88  | 6 | 0 | -21.464688 | 8.399589  | 5.604303  |
| 89  | 1 | 0 | -19.655694 | 9.337299  | 5.755389  |
| 90  | 6 | 0 | -20.679831 | 9.546066  | 7.633096  |
| 91  | 1 | 0 | -20.481560 | 10.617618 | 7.754095  |
| 92  | 1 | 0 | -21.701654 | 9.329408  | 7.951641  |
| 93  | 1 | 0 | -19.986655 | 8.987050  | 8.275756  |
| 94  | 8 | 0 | -22.503181 | 7.961841  | 6.113561  |
| 95  | 7 | 0 | -20.539601 | 9.158443  | 6.238383  |
| 96  | 6 | 0 | -21.715236 | 9.251314  | 3.287161  |
| 97  | 1 | 0 | -21.530664 | 9.074816  | 2.199496  |
| 98  | 1 | 0 | -22.815790 | 9.357470  | 3.447363  |
| 99  | 1 | 0 | -21.216392 | 10.207458 | 3.581045  |
| 100 | 6 | 0 | -16.985642 | 8.468237  | 0.957201  |
| 101 | 1 | 0 | -15.951270 | 8.605975  | 0.555911  |
| 102 | 1 | 0 | -17.524001 | 7.730542  | 0.312796  |
| 103 | 1 | 0 | -17.521063 | 9.446999  | 0.899308  |
| 104 | 6 | 0 | -16.733068 | 3.389501  | 3.565874  |
| 105 | 1 | 0 | -17.822984 | 3.287611  | 3.792937  |
| 106 | 1 | 0 | -16.288336 | 2.367793  | 3.480326  |
| 107 | 1 | 0 | -16.241202 | 3.919496  | 4.417489  |
| 108 | 6 | 0 | -21.358053 | 3.741278  | 4.385143  |
| 109 | 1 | 0 | -21.832930 | 2.729093  | 4.381158  |
| 110 | 1 | 0 | -20.258779 | 3.616192  | 4.543447  |
| 111 | 1 | 0 | -21.777964 | 4.324989  | 5.240375  |
| 112 | 6 | 0 | -21.559133 | 3.204538  | -1.176181 |
| 113 | 1 | 0 | -21.131868 | 2.804145  | -2.127911 |
| 114 | 1 | 0 | -22.656813 | 3.356541  | -1.317141 |
| 115 | 1 | 0 | -21.083668 | 4.193740  | -0.963664 |
| 116 | 6 | 0 | -16.502552 | 2.009607  | -1.978703 |
| 117 | 1 | 0 | -15.395960 | 2.073544  | -2.123683 |
| 118 | 1 | 0 | -16.915726 | 1.264722  | -2.702331 |
| 119 | 1 | 0 | -16.948445 | 3.008745  | -2.204635 |
| 120 | 6 | 0 | -21.635994 | -2.097149 | 0.826576  |
| 121 | 1 | 0 | -22.154246 | -3.086717 | 0.867050  |
| 122 | 1 | 0 | -20.573965 | -2.240352 | 1.144209  |
| 123 | 1 | 0 | -22.135019 | -1.405965 | 1.548840  |
| 124 | 6 | 0 | -17.078816 | -2.916620 | 0.871912  |
| 125 | 1 | 0 | -18.195598 | -2.955161 | 0.905689  |
| 126 | 1 | 0 | -16.683529 | -3.961121 | 0.914627  |
| 127 | 1 | 0 | -16.715165 | -2.363159 | 1.771623  |

|     |   |   |            |            |           |
|-----|---|---|------------|------------|-----------|
| 128 | 6 | 0 | -21.127918 | -3.161234  | -4.683212 |
| 129 | 1 | 0 | -22.193372 | -3.031756  | -4.993565 |
| 130 | 1 | 0 | -20.680863 | -2.152190  | -4.506455 |
| 131 | 1 | 0 | -20.572790 | -3.653427  | -5.518709 |
| 132 | 6 | 0 | -15.979836 | -4.563926  | -4.487077 |
| 133 | 1 | 0 | -14.862822 | -4.542517  | -4.447811 |
| 134 | 1 | 0 | -16.296344 | -5.319703  | -5.247166 |
| 135 | 1 | 0 | -16.343858 | -3.559264  | -4.812942 |
| 136 | 6 | 0 | -21.463304 | -8.332251  | -2.228404 |
| 137 | 1 | 0 | -20.422727 | -8.485837  | -1.849573 |
| 138 | 1 | 0 | -21.982274 | -7.602263  | -1.560322 |
| 139 | 1 | 0 | -22.005081 | -9.308074  | -2.178358 |
| 140 | 6 | 0 | -17.211194 | -9.357915  | -1.576136 |
| 141 | 1 | 0 | -16.973039 | -8.781060  | -0.649790 |
| 142 | 1 | 0 | -18.320449 | -9.366227  | -1.716983 |
| 143 | 1 | 0 | -16.863046 | -10.410785 | -1.438648 |
| 144 | 6 | 0 | -7.112382  | -5.408542  | -1.544360 |
| 145 | 7 | 0 | -6.727167  | -4.289210  | -0.671627 |
| 146 | 1 | 0 | -5.742171  | -4.198829  | -0.403494 |
| 147 | 6 | 0 | -7.604104  | -3.333945  | -0.300940 |
| 148 | 8 | 0 | -8.790927  | -3.297003  | -0.664794 |
| 149 | 6 | 0 | -7.041567  | -2.272928  | 0.673635  |
| 150 | 7 | 0 | -7.496409  | -0.944685  | 0.235465  |
| 151 | 1 | 0 | -8.500462  | -0.799580  | 0.086672  |
| 152 | 6 | 0 | -6.593440  | -6.723639  | -0.918535 |
| 153 | 8 | 0 | -5.427667  | -6.815106  | -0.498629 |
| 154 | 7 | 0 | -7.486889  | -7.734539  | -0.906684 |
| 155 | 1 | 0 | -8.454184  | -7.551776  | -1.193895 |
| 156 | 6 | 0 | -7.147843  | -9.075840  | -0.405013 |
| 157 | 6 | 0 | -7.508066  | -10.116678 | -1.490466 |
| 158 | 8 | 0 | -8.651006  | -10.173115 | -1.977253 |
| 159 | 7 | 0 | -6.508971  | -10.949819 | -1.839242 |
| 160 | 1 | 0 | -5.570739  | -10.802780 | -1.455076 |
| 161 | 1 | 0 | -8.205297  | -5.420586  | -1.599172 |
| 162 | 1 | 0 | -5.947701  | -2.273288  | 0.643673  |
| 163 | 1 | 0 | -6.069502  | -9.082482  | -0.215311 |
| 164 | 6 | 0 | -11.789426 | 2.237495   | -0.246172 |
| 165 | 6 | 0 | -12.411949 | 3.191237   | 0.800207  |
| 166 | 8 | 0 | -13.620696 | 3.128830   | 1.079276  |
| 167 | 7 | 0 | -11.555608 | 4.088549   | 1.329993  |
| 168 | 1 | 0 | -10.557520 | 4.021753   | 1.107421  |
| 169 | 6 | 0 | -11.985789 | 5.113810   | 2.292375  |
| 170 | 6 | 0 | -11.446598 | 6.486186   | 1.825352  |



|     |   |   |            |            |           |
|-----|---|---|------------|------------|-----------|
| 171 | 8 | 0 | -10.268080 | 6.617819   | 1.455786  |
| 172 | 7 | 0 | -12.338914 | 7.496962   | 1.888848  |
| 173 | 1 | 0 | -13.313987 | 7.289613   | 2.127981  |
| 174 | 7 | 0 | -12.275271 | 0.873142   | 0.009293  |
| 175 | 1 | 0 | -13.287480 | 0.720391   | 0.062569  |
| 176 | 6 | 0 | -11.443144 | -0.185722  | 0.074217  |
| 177 | 8 | 0 | -10.212660 | -0.115819  | -0.085500 |
| 178 | 6 | 0 | -12.122725 | -1.531384  | 0.418416  |
| 179 | 7 | 0 | -11.565044 | -2.580039  | -0.448729 |
| 180 | 1 | 0 | -10.546889 | -2.684856  | -0.491609 |
| 181 | 1 | 0 | -10.700233 | 2.223330   | -0.143343 |
| 182 | 1 | 0 | -13.080178 | 5.119691   | 2.299730  |
| 183 | 1 | 0 | -13.196920 | -1.474654  | 0.216987  |
| 184 | 6 | 0 | -7.298458  | 1.393551   | -0.439642 |
| 185 | 7 | 0 | -6.794634  | 2.540588   | 0.330384  |
| 186 | 1 | 0 | -5.781166  | 2.650923   | 0.435241  |
| 187 | 6 | 0 | -7.615594  | 3.498519   | 0.808049  |
| 188 | 8 | 0 | -8.845148  | 3.511025   | 0.633409  |
| 189 | 6 | 0 | -6.922720  | 4.590027   | 1.657193  |
| 190 | 7 | 0 | -7.476454  | 5.902915   | 1.291924  |
| 191 | 1 | 0 | -8.493822  | 6.024234   | 1.318070  |
| 192 | 6 | 0 | -6.689821  | 6.965503   | 1.023427  |
| 193 | 8 | 0 | -5.447992  | 6.943045   | 1.069289  |
| 194 | 6 | 0 | -6.654474  | 0.100319   | 0.110728  |
| 195 | 8 | 0 | -5.439730  | 0.052806   | 0.370018  |
| 196 | 1 | 0 | -8.383961  | 1.359332   | -0.307009 |
| 197 | 1 | 0 | -5.850749  | 4.613130   | 1.439203  |
| 198 | 6 | 0 | -11.587935 | -4.454076  | -2.016649 |
| 199 | 6 | 0 | -12.347558 | -3.469447  | -1.096164 |
| 200 | 8 | 0 | -13.586398 | -3.494591  | -1.015860 |
| 201 | 7 | 0 | -12.143069 | -5.804927  | -1.840274 |
| 202 | 1 | 0 | -13.154052 | -5.931543  | -1.954641 |
| 203 | 6 | 0 | -11.356113 | -6.885554  | -1.658590 |
| 204 | 8 | 0 | -10.114304 | -6.844984  | -1.618130 |
| 205 | 6 | 0 | -12.112257 | -8.218741  | -1.447338 |
| 206 | 7 | 0 | -11.446885 | -9.278148  | -2.218106 |
| 207 | 1 | 0 | -10.448399 | -9.441923  | -2.066402 |
| 208 | 6 | 0 | -12.119137 | -10.077712 | -3.078621 |
| 209 | 8 | 0 | -13.343674 | -9.985452  | -3.282704 |
| 210 | 1 | 0 | -10.531498 | -4.494628  | -1.734585 |
| 211 | 1 | 0 | -13.135086 | -8.135123  | -1.828292 |
| 212 | 6 | 0 | -11.278218 | -11.108454 | -3.814543 |
| 213 | 1 | 0 | -10.235261 | -11.110305 | -3.490081 |

|     |   |   |            |            |           |
|-----|---|---|------------|------------|-----------|
| 214 | 1 | 0 | -11.722012 | -12.096598 | -3.654167 |
| 215 | 1 | 0 | -11.330936 | -10.893250 | -4.887541 |
| 216 | 6 | 0 | -6.698972  | -11.993573 | -2.835551 |
| 217 | 1 | 0 | -5.855607  | -12.687351 | -2.781975 |
| 218 | 1 | 0 | -7.628549  | -12.538596 | -2.643279 |
| 219 | 1 | 0 | -6.754305  | -11.578792 | -3.850579 |
| 220 | 6 | 0 | -11.983707 | 8.877881   | 1.525799  |
| 221 | 1 | 0 | -10.899953 | 8.899050   | 1.371768  |
| 222 | 6 | 0 | -7.446395  | 8.242898   | 0.587988  |
| 223 | 1 | 0 | -8.487418  | 8.194654   | 0.923058  |
| 224 | 1 | 0 | -5.830796  | 9.567475   | 1.119786  |
| 225 | 6 | 0 | -7.566475  | 10.322483  | 1.918799  |
| 226 | 6 | 0 | -6.780494  | 11.466920  | 2.538164  |
| 227 | 1 | 0 | -5.716173  | 11.426472  | 2.295752  |
| 228 | 1 | 0 | -7.207654  | 12.411649  | 2.185558  |
| 229 | 1 | 0 | -6.914402  | 11.429354  | 3.624854  |
| 230 | 8 | 0 | -8.801183  | 10.242912  | 2.059097  |
| 231 | 7 | 0 | -6.836042  | 9.413189   | 1.233036  |
| 232 | 6 | 0 | -12.375873 | 9.818285   | 2.688499  |
| 233 | 1 | 0 | -10.450755 | 10.535229  | 2.735752  |
| 234 | 6 | 0 | -11.617106 | 11.600989  | 4.184628  |
| 235 | 1 | 0 | -10.812848 | 12.341479  | 4.162420  |
| 236 | 1 | 0 | -12.578355 | 12.105311  | 4.046474  |
| 237 | 1 | 0 | -11.626681 | 11.117406  | 5.170463  |
| 238 | 8 | 0 | -13.526026 | 9.815890   | 3.161925  |
| 239 | 7 | 0 | -11.396825 | 10.638226  | 3.115650  |
| 240 | 6 | 0 | -12.669943 | 9.373080   | 0.275373  |
| 241 | 1 | 0 | -12.409779 | 8.729695   | -0.599874 |
| 242 | 1 | 0 | -13.781381 | 9.375031   | 0.398804  |
| 243 | 1 | 0 | -12.334460 | 10.417256  | 0.061392  |
| 244 | 6 | 0 | -7.423472  | 8.293609   | -0.921949 |
| 245 | 1 | 0 | -6.376250  | 8.335495   | -1.311075 |
| 246 | 1 | 0 | -7.919178  | 7.377706   | -1.327416 |
| 247 | 1 | 0 | -7.976385  | 9.190160   | -1.293855 |
| 248 | 6 | 0 | -7.114252  | 4.228695   | 3.111558  |
| 249 | 1 | 0 | -8.198805  | 4.182130   | 3.379047  |
| 250 | 1 | 0 | -6.655130  | 3.228255   | 3.304650  |
| 251 | 1 | 0 | -6.617602  | 4.980607   | 3.771815  |
| 252 | 6 | 0 | -11.490085 | 4.878758   | 3.699623  |
| 253 | 1 | 0 | -11.863463 | 3.900880   | 4.089783  |
| 254 | 1 | 0 | -10.372822 | 4.875428   | 3.741181  |
| 255 | 1 | 0 | -11.869620 | 5.694105   | 4.363056  |
| 256 | 6 | 0 | -12.141540 | 2.765588   | -1.616889 |

|     |   |   |            |            |           |
|-----|---|---|------------|------------|-----------|
| 257 | 1 | 0 | -11.703284 | 2.116100   | -2.413127 |
| 258 | 1 | 0 | -13.249147 | 2.809075   | -1.763010 |
| 259 | 1 | 0 | -11.725596 | 3.796616   | -1.730650 |
| 260 | 6 | 0 | -6.994068  | 1.464633   | -1.917799 |
| 261 | 1 | 0 | -5.892200  | 1.488546   | -2.105134 |
| 262 | 1 | 0 | -7.423322  | 0.565704   | -2.424432 |
| 263 | 1 | 0 | -7.451261  | 2.378473   | -2.369274 |
| 264 | 6 | 0 | -11.919119 | -1.783865  | 1.894059  |
| 265 | 1 | 0 | -12.408993 | -2.740169  | 2.199801  |
| 266 | 1 | 0 | -10.832295 | -1.843441  | 2.149528  |
| 267 | 1 | 0 | -12.377888 | -0.947745  | 2.476579  |
| 268 | 6 | 0 | -7.491101  | -2.644239  | 2.067105  |
| 269 | 1 | 0 | -8.606530  | -2.662387  | 2.142341  |
| 270 | 1 | 0 | -7.099403  | -3.659727  | 2.320604  |
| 271 | 1 | 0 | -7.096289  | -1.914395  | 2.814999  |
| 272 | 6 | 0 | -11.693680 | -3.930951  | -3.430196 |
| 273 | 1 | 0 | -12.760069 | -3.864177  | -3.759521 |
| 274 | 1 | 0 | -11.240052 | -2.910815  | -3.479191 |
| 275 | 1 | 0 | -11.144430 | -4.598075  | -4.138163 |
| 276 | 6 | 0 | -6.556118  | -5.314475  | -2.945511 |
| 277 | 1 | 0 | -5.438167  | -5.314110  | -2.939161 |
| 278 | 1 | 0 | -6.909204  | -6.192594  | -3.539866 |
| 279 | 1 | 0 | -6.909606  | -4.381041  | -3.447112 |
| 280 | 6 | 0 | -12.165479 | -8.483812  | 0.039007  |
| 281 | 1 | 0 | -11.138708 | -8.571309  | 0.472660  |
| 282 | 1 | 0 | -12.695698 | -7.639244  | 0.543534  |
| 283 | 1 | 0 | -12.721898 | -9.429049  | 0.250476  |
| 284 | 6 | 0 | -7.876997  | -9.452705  | 0.861988  |
| 285 | 1 | 0 | -7.640598  | -8.733601  | 1.683363  |
| 286 | 1 | 0 | -8.983939  | -9.461261  | 0.702693  |
| 287 | 1 | 0 | -7.556028  | -10.474554 | 1.180377  |
| 288 | 1 | 0 | -15.495212 | -2.245421  | -0.384438 |
| 289 | 6 | 0 | 2.389827   | -5.611413  | -0.347495 |
| 290 | 7 | 0 | 2.806468   | -4.338334  | 0.259796  |
| 291 | 1 | 0 | 3.799497   | -4.201487  | 0.472338  |
| 292 | 6 | 0 | 1.944269   | -3.318323  | 0.448483  |
| 293 | 8 | 0 | 0.746848   | -3.349190  | 0.120871  |
| 294 | 6 | 0 | 2.539061   | -2.082019  | 1.162090  |
| 295 | 7 | 0 | 2.063798   | -0.870712  | 0.477082  |
| 296 | 1 | 0 | 1.054647   | -0.757855  | 0.333849  |
| 297 | 6 | 0 | 2.934645   | -6.772038  | 0.515997  |
| 298 | 8 | 0 | 4.114683   | -6.778141  | 0.905523  |
| 299 | 7 | 0 | 2.047943   | -7.757831  | 0.764034  |

|     |   |   |           |            |           |
|-----|---|---|-----------|------------|-----------|
| 300 | 1 | 0 | 1.069130  | -7.634929  | 0.483882  |
| 301 | 6 | 0 | 2.409374  | -8.965117  | 1.523968  |
| 302 | 6 | 0 | 2.001612  | -10.209795 | 0.702140  |
| 303 | 8 | 0 | 0.839699  | -10.357121 | 0.284733  |
| 304 | 7 | 0 | 2.984474  | -11.109580 | 0.502926  |
| 305 | 1 | 0 | 3.936868  | -10.892428 | 0.810526  |
| 306 | 1 | 0 | 1.295562  | -5.627704  | -0.356307 |
| 307 | 1 | 0 | 3.495100  | -8.942456  | 1.663349  |
| 308 | 6 | 0 | -2.256004 | 2.143400   | -0.502078 |
| 309 | 6 | 0 | -2.856626 | 3.305910   | 0.321720  |
| 310 | 8 | 0 | -4.051672 | 3.296500   | 0.660119  |
| 311 | 7 | 0 | -2.002145 | 4.314236   | 0.589386  |
| 312 | 1 | 0 | -1.009833 | 4.205883   | 0.357404  |
| 313 | 6 | 0 | -2.423409 | 5.530748   | 1.300594  |
| 314 | 6 | 0 | -1.896614 | 6.759570   | 0.524414  |
| 315 | 8 | 0 | -0.719673 | 6.807509   | 0.129439  |
| 316 | 7 | 0 | -2.795247 | 7.751702   | 0.355336  |
| 317 | 1 | 0 | -3.770924 | 7.597477   | 0.630475  |
| 318 | 7 | 0 | -2.722123 | 0.869616   | 0.065612  |
| 319 | 1 | 0 | -3.730222 | 0.733253   | 0.195471  |
| 320 | 6 | 0 | -1.881486 | -0.153138  | 0.318531  |
| 321 | 8 | 0 | -0.660254 | -0.124014  | 0.088985  |
| 322 | 6 | 0 | -2.534502 | -1.390149  | 0.977125  |
| 323 | 7 | 0 | -2.012712 | -2.601581  | 0.326549  |
| 324 | 1 | 0 | -0.997101 | -2.712700  | 0.249316  |
| 325 | 1 | 0 | -1.164227 | 2.155997   | -0.431470 |
| 326 | 1 | 0 | -3.517627 | 5.536207   | 1.322288  |
| 327 | 1 | 0 | -3.617556 | -1.372763  | 0.822166  |
| 328 | 6 | 0 | 2.229636  | 1.282924   | -0.662489 |
| 329 | 7 | 0 | 2.740978  | 2.563218   | -0.150066 |
| 330 | 1 | 0 | 3.755618  | 2.694358   | -0.093323 |
| 331 | 6 | 0 | 1.924937  | 3.601802   | 0.125047  |
| 332 | 8 | 0 | 0.692935  | 3.578240   | -0.029962 |
| 333 | 6 | 0 | 2.627332  | 4.847904   | 0.714057  |
| 334 | 7 | 0 | 2.064404  | 6.054732   | 0.089331  |
| 335 | 1 | 0 | 1.047608  | 6.182475   | 0.108480  |
| 336 | 6 | 0 | 2.843609  | 7.036372   | -0.410243 |
| 337 | 8 | 0 | 4.086167  | 7.020465   | -0.384769 |
| 338 | 6 | 0 | 2.895496  | 0.128057   | 0.120454  |
| 339 | 8 | 0 | 4.117213  | 0.133615   | 0.349775  |
| 340 | 1 | 0 | 1.147469  | 1.271912   | -0.501554 |
| 341 | 1 | 0 | 3.695904  | 4.824434   | 0.479477  |
| 342 | 6 | 0 | -2.102003 | -4.764918  | -0.805993 |

|     |   |   |           |            |           |
|-----|---|---|-----------|------------|-----------|
| 343 | 6 | 0 | -2.818791 | -3.607943  | -0.070782 |
| 344 | 8 | 0 | -4.050656 | -3.616365  | 0.086363  |
| 345 | 7 | 0 | -2.650751 | -6.046531  | -0.337376 |
| 346 | 1 | 0 | -3.665951 | -6.183888  | -0.375461 |
| 347 | 6 | 0 | -1.857854 | -7.073960  | 0.031290  |
| 348 | 8 | 0 | -0.615577 | -7.039219  | 0.005956  |
| 349 | 6 | 0 | -2.606595 | -8.322678  | 0.554228  |
| 350 | 7 | 0 | -1.980348 | -9.530107  | -0.001586 |
| 351 | 1 | 0 | -0.974400 | -9.664492  | 0.128163  |
| 352 | 6 | 0 | -2.696644 | -10.492906 | -0.627088 |
| 353 | 8 | 0 | -3.930778 | -10.436778 | -0.780724 |
| 354 | 1 | 0 | -1.034332 | -4.758051  | -0.566795 |
| 355 | 1 | 0 | -3.645873 | -8.309400  | 0.210469  |
| 356 | 6 | 0 | -1.893917 | -11.669083 | -1.159717 |
| 357 | 1 | 0 | -0.832326 | -11.601325 | -0.911343 |
| 358 | 1 | 0 | -2.315467 | -12.591846 | -0.747328 |
| 359 | 1 | 0 | -2.017495 | -11.706919 | -2.247621 |
| 360 | 6 | 0 | 2.751811  | -12.344882 | -0.230709 |
| 361 | 1 | 0 | 1.809110  | -12.800744 | 0.087152  |
| 362 | 1 | 0 | 2.694863  | -12.169122 | -1.313045 |
| 363 | 1 | 0 | 3.574760  | -13.035551 | -0.027406 |
| 364 | 6 | 0 | -2.449978 | 9.014529   | -0.316767 |
| 365 | 1 | 0 | -1.364635 | 9.013391   | -0.460748 |
| 366 | 6 | 0 | 2.076385  | 8.198015   | -1.085272 |
| 367 | 1 | 0 | 1.039246  | 8.216143   | -0.735742 |
| 368 | 1 | 0 | 3.693793  | 9.601632   | -0.841257 |
| 369 | 6 | 0 | 1.961300  | 10.505598  | -0.204822 |
| 370 | 6 | 0 | 2.751838  | 11.748550  | 0.171255  |
| 371 | 1 | 0 | 3.812443  | 11.663875  | -0.076263 |
| 372 | 1 | 0 | 2.314386  | 12.608283  | -0.346935 |
| 373 | 1 | 0 | 2.636710  | 11.918138  | 1.247553  |
| 374 | 8 | 0 | 0.726886  | 10.459242  | -0.049226 |
| 375 | 7 | 0 | 2.689110  | 9.474732   | -0.694256 |
| 376 | 6 | 0 | -2.867089 | 10.192799  | 0.593228  |
| 377 | 1 | 0 | -0.938919 | 10.900578  | 0.527794  |
| 378 | 6 | 0 | -2.134036 | 12.262496  | 1.674795  |
| 379 | 1 | 0 | -2.201699 | 12.007087  | 2.740466  |
| 380 | 1 | 0 | -1.309495 | 12.966138  | 1.531406  |
| 381 | 1 | 0 | -3.073767 | 12.741333  | 1.382471  |
| 382 | 8 | 0 | -4.029429 | 10.298892  | 1.022599  |
| 383 | 7 | 0 | -1.892185 | 11.084953  | 0.854394  |
| 384 | 6 | 0 | -3.127103 | 9.196496   | -1.653843 |
| 385 | 1 | 0 | -2.848327 | 8.372029   | -2.353973 |

|     |   |   |           |           |           |
|-----|---|---|-----------|-----------|-----------|
| 386 | 1 | 0 | -4.239917 | 9.210246  | -1.543636 |
| 387 | 1 | 0 | -2.802416 | 10.167749 | -2.100869 |
| 388 | 6 | 0 | 2.082738  | 7.944335  | -2.574725 |
| 389 | 1 | 0 | 3.125509  | 7.907263  | -2.976023 |
| 390 | 1 | 0 | 1.584888  | 6.965516  | -2.782220 |
| 391 | 1 | 0 | 1.523565  | 8.747755  | -3.112924 |
| 392 | 6 | 0 | 2.458643  | 4.801890  | 2.214720  |
| 393 | 1 | 0 | 1.378344  | 4.815910  | 2.502482  |
| 394 | 1 | 0 | 2.920988  | 3.863385  | 2.607609  |
| 395 | 1 | 0 | 2.965034  | 5.674782  | 2.693896  |
| 396 | 6 | 0 | -1.907050 | 5.623270  | 2.716975  |
| 397 | 1 | 0 | -2.271371 | 4.760046  | 3.325254  |
| 398 | 1 | 0 | -0.789295 | 5.629985  | 2.741680  |
| 399 | 1 | 0 | -2.279977 | 6.568400  | 3.182404  |
| 400 | 6 | 0 | -2.650757 | 2.351854  | -1.945410 |
| 401 | 1 | 0 | -2.228275 | 1.542471  | -2.589102 |
| 402 | 1 | 0 | -3.762258 | 2.358051  | -2.065723 |
| 403 | 1 | 0 | -2.247742 | 3.332752  | -2.298055 |
| 404 | 6 | 0 | 2.502193  | 1.057186  | -2.131440 |
| 405 | 1 | 0 | 3.599663  | 1.046939  | -2.344130 |
| 406 | 1 | 0 | 2.069570  | 0.073435  | -2.438120 |
| 407 | 1 | 0 | 2.028279  | 1.860327  | -2.746534 |
| 408 | 6 | 0 | -2.255618 | -1.321891 | 2.460369  |
| 409 | 1 | 0 | -2.721436 | -2.189665 | 2.987575  |
| 410 | 1 | 0 | -1.157052 | -1.327472 | 2.667793  |
| 411 | 1 | 0 | -2.692505 | -0.379645 | 2.872994  |
| 412 | 6 | 0 | 2.143621  | -2.157026 | 2.618109  |
| 413 | 1 | 0 | 1.031938  | -2.155743 | 2.737509  |
| 414 | 1 | 0 | 2.549418  | -3.099644 | 3.060480  |
| 415 | 1 | 0 | 2.562756  | -1.289935 | 3.184148  |
| 416 | 6 | 0 | -2.266568 | -4.535127 | -2.290194 |
| 417 | 1 | 0 | -3.345751 | -4.520010 | -2.581719 |
| 418 | 1 | 0 | -1.809122 | -3.552475 | -2.562401 |
| 419 | 1 | 0 | -1.752948 | -5.338956 | -2.871602 |
| 420 | 6 | 0 | 2.890977  | -5.811888 | -1.758267 |
| 421 | 1 | 0 | 4.008355  | -5.812842 | -1.795732 |
| 422 | 1 | 0 | 2.520185  | -6.793333 | -2.143340 |
| 423 | 1 | 0 | 2.513090  | -5.001928 | -2.428390 |
| 424 | 6 | 0 | -2.591790 | -8.264362 | 2.063914  |
| 425 | 1 | 0 | -1.546382 | -8.269412 | 2.460156  |
| 426 | 1 | 0 | -3.096853 | -7.325704 | 2.399795  |
| 427 | 1 | 0 | -3.139750 | -9.136330 | 2.496602  |
| 428 | 6 | 0 | 1.738139  | -9.057043 | 2.873134  |

|     |   |   |          |            |           |
|-----|---|---|----------|------------|-----------|
| 429 | 1 | 0 | 2.011738 | -8.182257  | 3.511526  |
| 430 | 1 | 0 | 0.625113 | -9.088171  | 2.768374  |
| 431 | 1 | 0 | 2.072819 | -9.991050  | 3.387129  |
| 432 | 6 | 0 | 7.271656 | 1.991129   | -1.008353 |
| 433 | 6 | 0 | 6.681670 | 3.295780   | -0.424100 |
| 434 | 8 | 0 | 5.493955 | 3.353794   | -0.066237 |
| 435 | 7 | 0 | 7.536598 | 4.338120   | -0.381969 |
| 436 | 1 | 0 | 8.523978 | 4.186161   | -0.609154 |
| 437 | 6 | 0 | 7.122307 | 5.672750   | 0.077163  |
| 438 | 6 | 0 | 7.628478 | 6.721007   | -0.940028 |
| 439 | 8 | 0 | 8.797680 | 6.687804   | -1.359659 |
| 440 | 7 | 0 | 6.723174 | 7.658684   | -1.286441 |
| 441 | 1 | 0 | 5.753606 | 7.563372   | -0.966236 |
| 442 | 7 | 0 | 6.823981 | 0.859446   | -0.183112 |
| 443 | 1 | 0 | 5.819457 | 0.755380   | -0.003976 |
| 444 | 6 | 0 | 7.673827 | -0.088507  | 0.258780  |
| 445 | 8 | 0 | 8.890382 | -0.108809  | 0.003509  |
| 446 | 6 | 0 | 7.037530 | -1.161728  | 1.172147  |
| 447 | 7 | 0 | 7.542321 | -2.483423  | 0.769664  |
| 448 | 1 | 0 | 8.555620 | -2.612483  | 0.693286  |
| 449 | 1 | 0 | 8.364557 | 2.018591   | -0.966088 |
| 450 | 1 | 0 | 6.028614 | 5.680877   | 0.117666  |
| 451 | 1 | 0 | 5.950886 | -1.170467  | 1.044160  |
| 452 | 6 | 0 | 7.426528 | -4.832392  | 0.106869  |
| 453 | 6 | 0 | 6.727477 | -3.546425  | 0.607586  |
| 454 | 8 | 0 | 5.499976 | -3.518142  | 0.793538  |
| 455 | 7 | 0 | 6.884042 | -5.989962  | 0.834089  |
| 456 | 1 | 0 | 5.867984 | -6.126690  | 0.843731  |
| 457 | 6 | 0 | 7.680453 | -6.923997  | 1.392947  |
| 458 | 8 | 0 | 8.922514 | -6.900501  | 1.342354  |
| 459 | 6 | 0 | 6.937345 | -8.035704  | 2.170797  |
| 460 | 7 | 0 | 7.561804 | -9.332521  | 1.876649  |
| 461 | 1 | 0 | 8.569733 | -9.433679  | 2.017889  |
| 462 | 6 | 0 | 6.841737 | -10.409115 | 1.482749  |
| 463 | 8 | 0 | 5.605277 | -10.391008 | 1.340871  |
| 464 | 1 | 0 | 8.498666 | -4.784576  | 0.319821  |
| 465 | 1 | 0 | 5.896193 | -8.094220  | 1.838128  |
| 466 | 6 | 0 | 7.644372 | -11.668698 | 1.198632  |
| 467 | 1 | 0 | 8.707232 | -11.550302 | 1.421382  |
| 468 | 1 | 0 | 7.226913 | -12.487970 | 1.793212  |
| 469 | 1 | 0 | 7.515841 | -11.928838 | 0.142166  |
| 470 | 6 | 0 | 7.050436 | 8.765727   | -2.199323 |
| 471 | 1 | 0 | 8.132190 | 8.734948   | -2.364970 |

|     |   |   |           |           |           |
|-----|---|---|-----------|-----------|-----------|
| 472 | 6 | 0 | 6.650763  | 10.099211 | -1.525850 |
| 473 | 1 | 0 | 8.572500  | 10.779192 | -1.778759 |
| 474 | 6 | 0 | 7.400952  | 12.337184 | -0.881131 |
| 475 | 1 | 0 | 8.242969  | 12.986006 | -1.136713 |
| 476 | 1 | 0 | 6.476306  | 12.774528 | -1.271383 |
| 477 | 1 | 0 | 7.313076  | 12.281756 | 0.211681  |
| 478 | 8 | 0 | 5.499565  | 10.287896 | -1.095323 |
| 479 | 7 | 0 | 7.628086  | 11.024354 | -1.467228 |
| 480 | 6 | 0 | 6.342766  | 8.685788  | -3.530426 |
| 481 | 1 | 0 | 6.606316  | 7.739804  | -4.062673 |
| 482 | 1 | 0 | 5.232742  | 8.724500  | -3.399907 |
| 483 | 1 | 0 | 6.656101  | 9.550270  | -4.165335 |
| 484 | 6 | 0 | 7.663128  | 6.049649  | 1.436094  |
| 485 | 1 | 0 | 7.313960  | 5.326341  | 2.212500  |
| 486 | 1 | 0 | 8.781084  | 6.062792  | 1.438519  |
| 487 | 1 | 0 | 7.293720  | 7.068718  | 1.708217  |
| 488 | 6 | 0 | 6.844500  | 1.901447  | -2.454663 |
| 489 | 1 | 0 | 7.257027  | 0.978375  | -2.929713 |
| 490 | 1 | 0 | 5.730620  | 1.882366  | -2.548843 |
| 491 | 1 | 0 | 7.234629  | 2.790457  | -3.008198 |
| 492 | 6 | 0 | 7.354567  | -0.793475 | 2.602620  |
| 493 | 1 | 0 | 6.902688  | -1.532823 | 3.307691  |
| 494 | 1 | 0 | 8.458120  | -0.762008 | 2.778885  |
| 495 | 1 | 0 | 6.928242  | 0.215393  | 2.824928  |
| 496 | 6 | 0 | 7.232409  | -4.905000 | -1.389702 |
| 497 | 1 | 0 | 6.147571  | -4.946004 | -1.657016 |
| 498 | 1 | 0 | 7.683063  | -3.998391 | -1.862892 |
| 499 | 1 | 0 | 7.735299  | -5.810750 | -1.807698 |
| 500 | 6 | 0 | 6.959078  | -7.661386 | 3.634475  |
| 501 | 1 | 0 | 8.006132  | -7.579196 | 4.017416  |
| 502 | 1 | 0 | 6.450904  | -6.675044 | 3.768410  |
| 503 | 1 | 0 | 6.417197  | -8.425003 | 4.243655  |
| 504 | 1 | 0 | 3.630938  | -2.093917 | 1.092542  |
| 505 | 6 | 0 | 11.925443 | -5.581639 | 0.644608  |
| 506 | 7 | 0 | 12.360675 | -4.211408 | 0.955842  |
| 507 | 1 | 0 | 13.358057 | -4.039921 | 1.112212  |
| 508 | 6 | 0 | 11.504882 | -3.167951 | 0.948728  |
| 509 | 8 | 0 | 10.299635 | -3.259757 | 0.666555  |
| 510 | 6 | 0 | 12.121022 | -1.813855 | 1.371888  |
| 511 | 7 | 0 | 11.631033 | -0.767988 | 0.461991  |
| 512 | 1 | 0 | 10.618333 | -0.678256 | 0.326615  |
| 513 | 6 | 0 | 12.473298 | -6.530645 | 1.734290  |
| 514 | 8 | 0 | 13.661404 | -6.465901 | 2.095705  |



|     |   |   |           |            |           |
|-----|---|---|-----------|------------|-----------|
| 515 | 7 | 0 | 11.582973 | -7.421955  | 2.213539  |
| 516 | 1 | 0 | 10.601423 | -7.359437  | 1.921389  |
| 517 | 6 | 0 | 11.947112 | -8.429720  | 3.222194  |
| 518 | 6 | 0 | 11.551730 | -9.829921  | 2.697383  |
| 519 | 8 | 0 | 10.397114 | -10.072672 | 2.307245  |
| 520 | 7 | 0 | 12.539014 | -10.747140 | 2.724337  |
| 521 | 1 | 0 | 13.483344 | -10.461032 | 2.994041  |
| 522 | 1 | 0 | 10.831117 | -5.587718  | 0.653466  |
| 523 | 1 | 0 | 13.031778 | -8.369468  | 3.357363  |
| 524 | 6 | 0 | 11.766248 | 1.103993   | -1.098270 |
| 525 | 7 | 0 | 12.277026 | 2.462811   | -0.860722 |
| 526 | 1 | 0 | 13.291296 | 2.604130   | -0.848660 |
| 527 | 6 | 0 | 11.457952 | 3.533092   | -0.786958 |
| 528 | 8 | 0 | 10.223789 | 3.474083   | -0.909421 |
| 529 | 6 | 0 | 12.161292 | 4.876804   | -0.480577 |
| 530 | 7 | 0 | 11.573644 | 5.928624   | -1.324405 |
| 531 | 1 | 0 | 10.557847 | 6.064117   | -1.296166 |
| 532 | 6 | 0 | 12.330354 | 6.771839   | -2.056258 |
| 533 | 8 | 0 | 13.573250 | 6.747090   | -2.081947 |
| 534 | 6 | 0 | 12.455043 | 0.129979   | -0.114633 |
| 535 | 8 | 0 | 13.683061 | 0.173644   | 0.074306  |
| 536 | 1 | 0 | 10.687284 | 1.122079   | -0.916941 |
| 537 | 1 | 0 | 13.224542 | 4.811570   | -0.730967 |
| 538 | 6 | 0 | 12.321590 | -12.119697 | 2.291255  |
| 539 | 1 | 0 | 11.363474 | -12.486932 | 2.671166  |
| 540 | 1 | 0 | 12.305878 | -12.201867 | 1.196488  |
| 541 | 1 | 0 | 13.129531 | -12.744861 | 2.681184  |
| 542 | 6 | 0 | 11.536597 | 7.772103   | -2.929746 |
| 543 | 1 | 0 | 10.510896 | 7.862569   | -2.558718 |
| 544 | 1 | 0 | 13.149060 | 9.196739   | -3.044985 |
| 545 | 6 | 0 | 11.438029 | 10.210380  | -2.527855 |
| 546 | 6 | 0 | 12.232221 | 11.504398  | -2.450006 |
| 547 | 1 | 0 | 13.282332 | 11.371286  | -2.719904 |
| 548 | 1 | 0 | 11.766321 | 12.238274  | -3.115889 |
| 549 | 1 | 0 | 12.160202 | 11.893157  | -1.428232 |
| 550 | 8 | 0 | 10.212187 | 10.195937  | -2.311805 |
| 551 | 7 | 0 | 12.154085 | 9.101308   | -2.827685 |
| 552 | 6 | 0 | 11.499387 | 7.219528   | -4.335500 |
| 553 | 1 | 0 | 12.529798 | 7.101250   | -4.752755 |
| 554 | 1 | 0 | 11.001627 | 6.218993   | -4.323446 |
| 555 | 1 | 0 | 10.919144 | 7.896115   | -5.008841 |
| 556 | 6 | 0 | 12.026294 | 5.137733   | 1.001207  |
| 557 | 1 | 0 | 10.952469 | 5.206486   | 1.305093  |

|     |   |   |           |           |           |
|-----|---|---|-----------|-----------|-----------|
| 558 | 1 | 0 | 12.504752 | 4.300876  | 1.566606  |
| 559 | 1 | 0 | 12.535726 | 6.091952  | 1.280406  |
| 560 | 6 | 0 | 12.013307 | 0.592196  | -2.498245 |
| 561 | 1 | 0 | 13.106691 | 0.544962  | -2.726471 |
| 562 | 1 | 0 | 11.583526 | -0.434901 | -2.594863 |
| 563 | 1 | 0 | 11.521103 | 1.254821  | -3.251014 |
| 564 | 6 | 0 | 11.764181 | -1.580538 | 2.821202  |
| 565 | 1 | 0 | 10.656031 | -1.544978 | 2.965759  |
| 566 | 1 | 0 | 12.178629 | -2.413549 | 3.440186  |
| 567 | 1 | 0 | 12.200655 | -0.618018 | 3.183128  |
| 568 | 6 | 0 | 12.404649 | -6.089052 | -0.694724 |
| 569 | 1 | 0 | 13.521313 | -6.111679 | -0.744392 |
| 570 | 1 | 0 | 12.019404 | -7.126143 | -0.853262 |
| 571 | 1 | 0 | 12.024752 | -5.439242 | -1.520171 |
| 572 | 6 | 0 | 11.269645 | -8.224635 | 4.555651  |
| 573 | 1 | 0 | 11.533553 | -7.227760 | 4.984863  |
| 574 | 1 | 0 | 10.157397 | -8.287064 | 4.456558  |
| 575 | 1 | 0 | 11.608036 | -9.018518 | 5.265490  |
| 576 | 6 | 0 | 21.376624 | -5.400880 | 1.653661  |
| 577 | 7 | 0 | 21.936259 | -4.065638 | 1.400317  |
| 578 | 1 | 0 | 22.904540 | -3.933074 | 1.673106  |
| 579 | 6 | 0 | 21.175907 | -3.003121 | 1.047364  |
| 580 | 8 | 0 | 19.965487 | -3.081924 | 0.800291  |
| 581 | 6 | 0 | 21.921545 | -1.649276 | 1.000991  |
| 582 | 7 | 0 | 21.274551 | -0.801758 | -0.002317 |
| 583 | 1 | 0 | 20.253176 | -0.820306 | -0.066788 |
| 584 | 6 | 0 | 21.913186 | -5.887266 | 3.021824  |
| 585 | 8 | 0 | 23.056492 | -5.604400 | 3.394660  |
| 586 | 7 | 0 | 21.034714 | -6.657711 | 3.713645  |
| 587 | 1 | 0 | 20.064490 | -6.725580 | 3.388284  |
| 588 | 6 | 0 | 21.376063 | -7.230026 | 5.018703  |
| 589 | 6 | 0 | 21.024157 | -8.735290 | 5.003743  |
| 590 | 8 | 0 | 19.899450 | -9.135279 | 4.680940  |
| 591 | 7 | 0 | 22.026558 | -9.566536 | 5.392450  |
| 592 | 1 | 0 | 22.936101 | -9.160846 | 5.566841  |
| 593 | 1 | 0 | 20.287310 | -5.304433 | 1.685190  |
| 594 | 1 | 0 | 22.960856 | -1.795684 | 0.679456  |
| 595 | 1 | 0 | 22.454398 | -7.073939 | 5.146767  |
| 596 | 6 | 0 | 16.813445 | 1.722523  | -1.705177 |
| 597 | 6 | 0 | 16.214890 | 3.111120  | -1.381460 |
| 598 | 8 | 0 | 15.043022 | 3.223458  | -0.988922 |
| 599 | 7 | 0 | 17.040511 | 4.155670  | -1.600336 |
| 600 | 1 | 0 | 18.015612 | 3.987148  | -1.856187 |

|     |   |   |           |           |           |
|-----|---|---|-----------|-----------|-----------|
| 601 | 6 | 0 | 16.598551 | 5.548635  | -1.423038 |
| 602 | 6 | 0 | 17.085194 | 6.367012  | -2.639310 |
| 603 | 8 | 0 | 18.252974 | 6.257496  | -3.048540 |
| 604 | 7 | 0 | 16.167861 | 7.202017  | -3.171090 |
| 605 | 1 | 0 | 15.201983 | 7.173404  | -2.825933 |
| 606 | 7 | 0 | 16.391809 | 0.773907  | -0.664128 |
| 607 | 1 | 0 | 15.394063 | 0.723500  | -0.431982 |
| 608 | 6 | 0 | 17.245077 | -0.104918 | -0.098877 |
| 609 | 8 | 0 | 18.444863 | -0.211247 | -0.403503 |
| 610 | 6 | 0 | 16.636104 | -0.961738 | 1.034238  |
| 611 | 7 | 0 | 17.126427 | -2.343847 | 0.908460  |
| 612 | 1 | 0 | 18.132384 | -2.492554 | 0.805007  |
| 613 | 1 | 0 | 17.906621 | 1.769948  | -1.689340 |
| 614 | 1 | 0 | 15.505223 | 5.543677  | -1.380622 |
| 615 | 1 | 0 | 15.546056 | -0.990301 | 0.941725  |
| 616 | 6 | 0 | 21.122294 | 0.874636  | -1.765924 |
| 617 | 7 | 0 | 21.752018 | 2.182404  | -1.989845 |
| 618 | 1 | 0 | 22.762805 | 2.200806  | -1.891704 |
| 619 | 6 | 0 | 21.048063 | 3.327578  | -2.125222 |
| 620 | 8 | 0 | 19.810699 | 3.369553  | -2.161243 |
| 621 | 6 | 0 | 21.901238 | 4.614328  | -2.205922 |
| 622 | 7 | 0 | 21.128577 | 5.635681  | -2.917539 |
| 623 | 1 | 0 | 20.107188 | 5.610446  | -2.853669 |
| 624 | 6 | 0 | 21.738091 | 6.666269  | -3.549536 |
| 625 | 8 | 0 | 22.962891 | 6.836116  | -3.588176 |
| 626 | 6 | 0 | 21.969304 | 0.123000  | -0.710443 |
| 627 | 8 | 0 | 23.177818 | 0.347777  | -0.585323 |
| 628 | 1 | 0 | 20.110765 | 1.040346  | -1.384114 |
| 629 | 1 | 0 | 22.812160 | 4.422075  | -2.788700 |
| 630 | 6 | 0 | 16.973405 | -4.787778 | 0.835213  |
| 631 | 6 | 0 | 16.302612 | -3.406371 | 1.029120  |
| 632 | 8 | 0 | 15.083477 | -3.318862 | 1.244664  |
| 633 | 7 | 0 | 16.412821 | -5.727612 | 1.817937  |
| 634 | 1 | 0 | 15.394398 | -5.847284 | 1.850964  |
| 635 | 6 | 0 | 17.185936 | -6.470533 | 2.633922  |
| 636 | 8 | 0 | 18.429620 | -6.459435 | 2.616452  |
| 637 | 6 | 0 | 16.413086 | -7.327039 | 3.664992  |
| 638 | 7 | 0 | 17.061453 | -8.638283 | 3.795086  |
| 639 | 1 | 0 | 18.053543 | -8.669012 | 4.031363  |
| 640 | 6 | 0 | 16.377303 | -9.801939 | 3.676228  |
| 641 | 8 | 0 | 15.156650 | -9.857752 | 3.447892  |
| 642 | 1 | 0 | 18.048830 | -4.715004 | 1.024327  |
| 643 | 1 | 0 | 15.391996 | -7.502768 | 3.313038  |

|     |   |   |           |            |           |
|-----|---|---|-----------|------------|-----------|
| 644 | 6 | 0 | 17.205768 | -11.068427 | 3.823927  |
| 645 | 1 | 0 | 18.250145 | -10.863526 | 4.070657  |
| 646 | 1 | 0 | 16.754338 | -11.690122 | 4.603975  |
| 647 | 1 | 0 | 17.152905 | -11.628018 | 2.883782  |
| 648 | 6 | 0 | 21.886529 | -11.015944 | 5.457982  |
| 649 | 1 | 0 | 22.334643 | -11.396593 | 6.381865  |
| 650 | 1 | 0 | 20.821953 | -11.256688 | 5.448167  |
| 651 | 1 | 0 | 22.365501 | -11.504377 | 4.600138  |
| 652 | 6 | 0 | 16.473983 | 8.079497   | -4.312034 |
| 653 | 1 | 0 | 17.553926 | 8.010506   | -4.484987 |
| 654 | 6 | 0 | 20.775021 | 7.646027   | -4.265911 |
| 655 | 1 | 0 | 19.958969 | 7.911529   | -3.584416 |
| 656 | 1 | 0 | 22.559750 | 8.726763   | -4.521916 |
| 657 | 6 | 0 | 20.984442 | 10.046139  | -4.835190 |
| 658 | 6 | 0 | 21.939658 | 11.200777  | -5.092626 |
| 659 | 1 | 0 | 22.993204 | 10.911593  | -5.034733 |
| 660 | 1 | 0 | 21.733078 | 11.611467  | -6.086102 |
| 661 | 1 | 0 | 21.742056 | 11.990355  | -4.360524 |
| 662 | 8 | 0 | 19.753582 | 10.216309  | -4.865163 |
| 663 | 7 | 0 | 21.552321 | 8.850073   | -4.570332 |
| 664 | 6 | 0 | 16.066785 | 9.528511   | -3.955330 |
| 665 | 1 | 0 | 17.953407 | 10.205511  | -4.456111 |
| 666 | 6 | 0 | 16.749866 | 11.877270  | -3.909176 |
| 667 | 1 | 0 | 17.598354 | 12.455540  | -4.282359 |
| 668 | 1 | 0 | 15.835804 | 12.201252  | -4.418028 |
| 669 | 1 | 0 | 16.626076 | 12.070871  | -2.836320 |
| 670 | 8 | 0 | 14.928829 | 9.786241   | -3.527152 |
| 671 | 7 | 0 | 17.008175 | 10.467102  | -4.168161 |
| 672 | 6 | 0 | 15.752978 | 7.697014   | -5.582634 |
| 673 | 1 | 0 | 16.023005 | 6.658907   | -5.894315 |
| 674 | 1 | 0 | 14.644018 | 7.751567   | -5.448343 |
| 675 | 1 | 0 | 16.046550 | 8.401630   | -6.398761 |
| 676 | 6 | 0 | 20.162876 | 6.971557   | -5.469356 |
| 677 | 1 | 0 | 20.941143 | 6.530707   | -6.137132 |
| 678 | 1 | 0 | 19.474797 | 6.159722   | -5.122351 |
| 679 | 1 | 0 | 19.563381 | 7.709025   | -6.059399 |
| 680 | 6 | 0 | 22.324594 | 5.002834   | -0.807669 |
| 681 | 1 | 0 | 21.442282 | 5.177035   | -0.145371 |
| 682 | 1 | 0 | 22.949562 | 4.190097   | -0.363495 |
| 683 | 1 | 0 | 22.934858 | 5.939693   | -0.839932 |
| 684 | 6 | 0 | 17.131228 | 6.210341   | -0.174571 |
| 685 | 1 | 0 | 16.806302 | 5.650429   | 0.735908  |
| 686 | 1 | 0 | 18.247590 | 6.257645   | -0.184189 |

|     |   |   |           |           |           |
|-----|---|---|-----------|-----------|-----------|
| 687 | 1 | 0 | 16.729926 | 7.251668  | -0.112653 |
| 688 | 6 | 0 | 16.370561 | 1.343847  | -3.099134 |
| 689 | 1 | 0 | 16.790018 | 0.349387  | -3.387585 |
| 690 | 1 | 0 | 15.256028 | 1.293582  | -3.171618 |
| 691 | 1 | 0 | 16.741708 | 2.109439  | -3.823780 |
| 692 | 6 | 0 | 21.025582 | 0.014837  | -3.003293 |
| 693 | 1 | 0 | 22.035814 | -0.253466 | -3.397121 |
| 694 | 1 | 0 | 20.475709 | -0.925258 | -2.750475 |
| 695 | 1 | 0 | 20.462117 | 0.547652  | -3.807894 |
| 696 | 6 | 0 | 16.993322 | -0.303637 | 2.346678  |
| 697 | 1 | 0 | 16.565057 | -0.878516 | 3.203517  |
| 698 | 1 | 0 | 18.100938 | -0.237635 | 2.480609  |
| 699 | 1 | 0 | 16.568586 | 0.730006  | 2.366208  |
| 700 | 6 | 0 | 21.942685 | -1.073394 | 2.398701  |
| 701 | 1 | 0 | 20.908380 | -0.907860 | 2.787787  |
| 702 | 1 | 0 | 22.474978 | -1.775409 | 3.085948  |
| 703 | 1 | 0 | 22.483838 | -0.095104 | 2.404149  |
| 704 | 6 | 0 | 16.762642 | -5.207319 | -0.600052 |
| 705 | 1 | 0 | 15.674553 | -5.287194 | -0.844555 |
| 706 | 1 | 0 | 17.226143 | -4.447735 | -1.276353 |
| 707 | 1 | 0 | 17.243092 | -6.196834 | -0.795361 |
| 708 | 6 | 0 | 21.741050 | -6.427857 | 0.609560  |
| 709 | 1 | 0 | 22.845046 | -6.593867 | 0.566293  |
| 710 | 1 | 0 | 21.242114 | -7.395766 | 0.862395  |
| 711 | 1 | 0 | 21.391773 | -6.102891 | -0.400817 |
| 712 | 6 | 0 | 16.351793 | -6.542275 | 4.954777  |
| 713 | 1 | 0 | 17.375256 | -6.323146 | 5.347328  |
| 714 | 1 | 0 | 15.824204 | -5.574345 | 4.770270  |
| 715 | 1 | 0 | 15.787309 | -7.109969 | 5.733935  |
| 716 | 6 | 0 | 20.653753 | -6.598163 | 6.184967  |
| 717 | 1 | 0 | 20.891032 | -5.508451 | 6.251009  |
| 718 | 1 | 0 | 19.546101 | -6.715982 | 6.084831  |
| 719 | 1 | 0 | 20.978579 | -7.091028 | 7.133583  |
| 720 | 1 | 0 | 13.210717 | -1.848089 | 1.278807  |

P Pl (Ac-VQIVYK-NHMe)<sub>1</sub>

|    |   |   |            |           |           |
|----|---|---|------------|-----------|-----------|
| 1  | 6 | 0 | -13.381796 | 0.447726  | 0.297275  |
| 2  | 6 | 0 | -12.101983 | 1.139670  | -0.157116 |
| 3  | 8 | 0 | -12.119843 | 2.197091  | -0.788661 |
| 4  | 1 | 0 | -10.935230 | -0.326962 | 0.761931  |
| 5  | 7 | 0 | -10.941293 | 0.494624  | 0.168501  |
| 6  | 6 | 0 | -9.623076  | 1.037683  | -0.164050 |
| 7  | 6 | 0 | -8.620815  | -0.131915 | -0.006733 |
| 8  | 8 | 0 | -8.881757  | -1.097203 | 0.729266  |
| 9  | 6 | 0 | -9.212295  | 2.251675  | 0.668991  |
| 10 | 6 | 0 | -8.917187  | 1.891944  | 2.108536  |
| 11 | 6 | 0 | -8.040792  | 2.987078  | 0.050690  |
| 12 | 1 | 0 | -14.006699 | 0.260795  | -0.581595 |
| 13 | 1 | 0 | -13.207572 | -0.496987 | 0.822408  |
| 14 | 1 | 0 | -13.932627 | 1.128891  | 0.953811  |
| 15 | 1 | 0 | -9.647031  | 1.359086  | -1.215136 |
| 16 | 1 | 0 | -10.095727 | 2.960519  | 0.653989  |
| 17 | 1 | 0 | -8.612815  | 2.804809  | 2.675335  |
| 18 | 1 | 0 | -9.819801  | 1.454413  | 2.598794  |
| 19 | 1 | 0 | -8.088928  | 1.144350  | 2.169502  |
| 20 | 1 | 0 | -7.973834  | 4.011733  | 0.492420  |
| 21 | 1 | 0 | -7.070920  | 2.469535  | 0.250368  |
| 22 | 1 | 0 | -8.171492  | 3.093036  | -1.053513 |
| 23 | 1 | 0 | -7.286577  | 0.848667  | -1.219666 |
| 24 | 7 | 0 | -7.492136  | -0.029854 | -0.742688 |
| 25 | 6 | 0 | -6.310476  | -0.873048 | -0.577703 |
| 26 | 6 | 0 | -5.095810  | 0.076866  | -0.675830 |
| 27 | 8 | 0 | -5.204939  | 1.186602  | -1.212033 |
| 28 | 6 | 0 | -6.211492  | -1.972396 | -1.664698 |
| 29 | 6 | 0 | -7.297048  | -3.063309 | -1.557451 |
| 30 | 6 | 0 | -7.015799  | -4.026132 | -0.397934 |
| 31 | 8 | 0 | -6.188701  | -4.931696 | -0.502746 |
| 32 | 7 | 0 | -7.736789  | -3.797142 | 0.741412  |
| 33 | 1 | 0 | -7.505745  | -4.356664 | 1.552001  |
| 34 | 1 | 0 | -8.263858  | -2.932482 | 0.855196  |
| 35 | 1 | 0 | -6.346594  | -1.335756 | 0.414442  |
| 36 | 1 | 0 | -6.279018  | -1.482705 | -2.644165 |
| 37 | 1 | 0 | -5.226938  | -2.451107 | -1.608240 |
| 38 | 1 | 0 | -8.289461  | -2.609522 | -1.471659 |
| 39 | 1 | 0 | -7.274019  | -3.667324 | -2.469890 |
| 40 | 1 | 0 | -3.889917  | -1.294357 | 0.324511  |
| 41 | 7 | 0 | -3.938585  | -0.409537 | -0.176730 |

|    |   |   |           |           |           |
|----|---|---|-----------|-----------|-----------|
| 42 | 6 | 0 | -2.669331 | 0.326341  | -0.215367 |
| 43 | 6 | 0 | -1.585753 | -0.720551 | 0.171821  |
| 44 | 8 | 0 | -1.893325 | -1.760114 | 0.763734  |
| 45 | 6 | 0 | -2.633660 | 1.557111  | 0.688345  |
| 46 | 6 | 0 | -1.457593 | 2.463085  | 0.341381  |
| 47 | 6 | 0 | -2.616407 | 1.182699  | 2.154929  |
| 48 | 6 | 0 | -1.737086 | 3.900728  | 0.703525  |
| 49 | 1 | 0 | -2.500978 | 0.665830  | -1.247897 |
| 50 | 1 | 0 | -3.582028 | 2.139705  | 0.480469  |
| 51 | 1 | 0 | -0.538027 | 2.119337  | 0.884749  |
| 52 | 1 | 0 | -1.241826 | 2.406006  | -0.759143 |
| 53 | 1 | 0 | -2.570840 | 2.103752  | 2.785095  |
| 54 | 1 | 0 | -3.537609 | 0.613625  | 2.427175  |
| 55 | 1 | 0 | -1.728931 | 0.546447  | 2.392571  |
| 56 | 1 | 0 | -0.849160 | 4.534301  | 0.463067  |
| 57 | 1 | 0 | -2.614010 | 4.290235  | 0.131655  |
| 58 | 1 | 0 | -1.956545 | 4.000725  | 1.793995  |
| 59 | 1 | 0 | -0.095079 | 0.433954  | -0.712196 |
| 60 | 7 | 0 | -0.320764 | -0.411862 | -0.193118 |
| 61 | 6 | 0 | 0.834424  | -1.262189 | 0.116343  |
| 62 | 6 | 0 | 2.077416  | -0.353378 | -0.092102 |
| 63 | 8 | 0 | 2.006033  | 0.678861  | -0.769420 |
| 64 | 6 | 0 | 0.902242  | -2.541651 | -0.713552 |
| 65 | 6 | 0 | 1.220637  | -2.270489 | -2.167835 |
| 66 | 6 | 0 | 1.884139  | -3.537875 | -0.130404 |
| 67 | 1 | 0 | 0.770781  | -1.557460 | 1.173672  |
| 68 | 1 | 0 | -0.125728 | -3.014366 | -0.657206 |
| 69 | 1 | 0 | 1.287079  | -3.233902 | -2.728912 |
| 70 | 1 | 0 | 0.425400  | -1.642205 | -2.635996 |
| 71 | 1 | 0 | 2.195828  | -1.734019 | -2.267247 |
| 72 | 1 | 0 | 1.652120  | -4.557810 | -0.524995 |
| 73 | 1 | 0 | 2.936536  | -3.297345 | -0.416913 |
| 74 | 1 | 0 | 1.810500  | -3.572127 | 0.983431  |
| 75 | 1 | 0 | 3.262914  | -1.659565 | 1.007493  |
| 76 | 7 | 0 | 3.203456  | -0.754957 | 0.541469  |
| 77 | 6 | 0 | 4.500011  | -0.103129 | 0.338109  |
| 78 | 6 | 0 | 5.567404  | -1.126247 | 0.811022  |
| 79 | 8 | 0 | 5.238535  | -2.237606 | 1.236222  |
| 80 | 6 | 0 | 4.656699  | 1.234992  | 1.051348  |
| 81 | 6 | 0 | 5.354358  | 2.234874  | 0.195262  |
| 82 | 6 | 0 | 4.705634  | 2.730796  | -0.943526 |
| 83 | 6 | 0 | 6.625998  | 2.714495  | 0.531830  |
| 84 | 6 | 0 | 5.315992  | 3.691841  | -1.742567 |

|     |   |   |           |           |           |
|-----|---|---|-----------|-----------|-----------|
| 85  | 6 | 0 | 7.251205  | 3.676713  | -0.254954 |
| 86  | 6 | 0 | 6.590259  | 4.163831  | -1.394135 |
| 87  | 8 | 0 | 7.258456  | 5.111728  | -2.134689 |
| 88  | 1 | 0 | 6.685025  | 5.374577  | -2.869191 |
| 89  | 1 | 0 | 4.638439  | 0.065904  | -0.741802 |
| 90  | 1 | 0 | 3.640003  | 1.649104  | 1.305528  |
| 91  | 1 | 0 | 5.200577  | 1.101065  | 2.023781  |
| 92  | 1 | 0 | 3.700250  | 2.352278  | -1.200947 |
| 93  | 1 | 0 | 7.148288  | 2.331716  | 1.426566  |
| 94  | 1 | 0 | 4.804292  | 4.080105  | -2.634154 |
| 95  | 1 | 0 | 8.249264  | 4.058813  | 0.001527  |
| 96  | 1 | 0 | 7.054112  | 0.265361  | 0.489989  |
| 97  | 7 | 0 | 6.853965  | -0.712648 | 0.690050  |
| 98  | 6 | 0 | 7.975785  | -1.486769 | 1.224287  |
| 99  | 6 | 0 | 8.818084  | -0.540013 | 2.124718  |
| 100 | 8 | 0 | 8.747781  | 0.684249  | 2.008951  |
| 101 | 6 | 0 | 8.860725  | -2.124207 | 0.170528  |
| 102 | 6 | 0 | 9.510643  | -1.122212 | -0.760128 |
| 103 | 6 | 0 | 10.527603 | -1.797672 | -1.654917 |
| 104 | 6 | 0 | 11.173497 | -0.770209 | -2.583753 |
| 105 | 7 | 0 | 12.197196 | -1.333829 | -3.431062 |
| 106 | 1 | 0 | 11.849005 | -2.118550 | -3.944547 |
| 107 | 1 | 0 | 12.535642 | -0.644509 | -4.072008 |
| 108 | 1 | 0 | 9.598737  | -2.185565 | 3.053833  |
| 109 | 7 | 0 | 9.619901  | -1.174384 | 3.023524  |
| 110 | 6 | 0 | 10.538205 | -0.467574 | 3.908528  |
| 111 | 1 | 0 | 7.537987  | -2.291412 | 1.830263  |
| 112 | 1 | 0 | 9.654494  | -2.721330 | 0.694804  |
| 113 | 1 | 0 | 8.248978  | -2.848006 | -0.432902 |
| 114 | 1 | 0 | 8.726427  | -0.625760 | -1.390664 |
| 115 | 1 | 0 | 10.009161 | -0.315228 | -0.158668 |
| 116 | 1 | 0 | 11.316033 | -2.292851 | -1.029704 |
| 117 | 1 | 0 | 10.025813 | -2.599359 | -2.257650 |
| 118 | 1 | 0 | 10.349115 | -0.268379 | -3.174520 |
| 119 | 1 | 0 | 11.660754 | 0.029920  | -1.955629 |
| 120 | 1 | 0 | 11.578563 | -0.745786 | 3.701242  |
| 121 | 1 | 0 | 10.413490 | 0.602127  | 3.731346  |
| 122 | 1 | 0 | 10.312011 | -0.684626 | 4.959008  |



P Pl (Ac-VQIVYK-NHMe)<sub>2</sub>

|    |   |   |            |           |           |
|----|---|---|------------|-----------|-----------|
| 1  | 8 | 0 | -7.698729  | -5.108621 | -1.202614 |
| 2  | 6 | 0 | -8.648311  | -4.391517 | -0.852743 |
| 3  | 7 | 0 | -8.802845  | -3.112710 | -1.296011 |
| 4  | 6 | 0 | -9.728774  | -4.893324 | 0.090920  |
| 5  | 6 | 0 | -7.819089  | -2.530345 | -2.224823 |
| 6  | 1 | 0 | -9.505849  | -2.500686 | -0.878409 |
| 7  | 1 | 0 | -10.271215 | -5.705433 | -0.405237 |
| 8  | 1 | 0 | -9.250836  | -5.313572 | 0.981166  |
| 9  | 1 | 0 | -10.433930 | -4.108590 | 0.379334  |
| 10 | 6 | 0 | -6.639491  | -1.966048 | -1.388966 |
| 11 | 6 | 0 | -8.381872  | -1.436609 | -3.118252 |
| 12 | 1 | 0 | -7.450861  | -3.356542 | -2.847447 |
| 13 | 7 | 0 | -5.734606  | -2.903165 | -1.013509 |
| 14 | 8 | 0 | -6.571713  | -0.771523 | -1.054114 |
| 15 | 6 | 0 | -7.354869  | -1.071752 | -4.174406 |
| 16 | 6 | 0 | -9.681431  | -1.853363 | -3.775277 |
| 17 | 1 | 0 | -8.575656  | -0.521997 | -2.483282 |
| 18 | 1 | 0 | -5.958484  | -3.876311 | -1.223531 |
| 19 | 6 | 0 | -4.625637  | -2.605548 | -0.103984 |
| 20 | 1 | 0 | -7.742702  | -0.237717 | -4.807361 |
| 21 | 1 | 0 | -6.402458  | -0.736720 | -3.692642 |
| 22 | 1 | 0 | -7.137816  | -1.945392 | -4.834725 |
| 23 | 1 | 0 | -9.959685  | -1.115214 | -4.566511 |
| 24 | 1 | 0 | -9.580860  | -2.859124 | -4.249148 |
| 25 | 1 | 0 | -10.510649 | -1.890074 | -3.027823 |
| 26 | 6 | 0 | -3.344886  | -2.396166 | -0.948284 |
| 27 | 6 | 0 | -4.464836  | -3.701822 | 0.954928  |
| 28 | 1 | 0 | -4.876765  | -1.655109 | 0.378679  |
| 29 | 8 | 0 | -2.624319  | -3.331806 | -1.316317 |
| 30 | 7 | 0 | -3.119707  | -1.099582 | -1.277098 |
| 31 | 6 | 0 | -3.500298  | -3.275182 | 2.074704  |
| 32 | 1 | 0 | -5.453402  | -3.910387 | 1.382123  |
| 33 | 1 | 0 | -4.102715  | -4.625759 | 0.494320  |
| 34 | 1 | 0 | -3.696395  | -0.354254 | -0.887417 |
| 35 | 6 | 0 | -2.042380  | -0.712790 | -2.198193 |
| 36 | 6 | 0 | -3.461427  | -4.297267 | 3.213193  |
| 37 | 1 | 0 | -2.479022  | -3.204356 | 1.674012  |
| 38 | 1 | 0 | -3.770149  | -2.287002 | 2.466837  |
| 39 | 6 | 0 | -0.736156  | -0.550264 | -1.371625 |
| 40 | 6 | 0 | -2.322497  | 0.578018  | -2.957171 |
| 41 | 1 | 0 | -1.916416  | -1.534955 | -2.915483 |

|    |   |   |           |           |           |
|----|---|---|-----------|-----------|-----------|
| 42 | 8 | 0 | -3.358717 | -5.506198 | 3.009294  |
| 43 | 7 | 0 | -3.526586 | -3.759015 | 4.469714  |
| 44 | 8 | 0 | -0.464309 | 0.492968  | -0.758517 |
| 45 | 7 | 0 | 0.042751  | -1.661177 | -1.350637 |
| 46 | 6 | 0 | -3.695997 | 0.565564  | -3.615656 |
| 47 | 6 | 0 | -1.228787 | 0.784317  | -3.987463 |
| 48 | 1 | 0 | -2.295474 | 1.434785  | -2.219841 |
| 49 | 1 | 0 | -3.526674 | -4.404319 | 5.248001  |
| 50 | 1 | 0 | -3.704665 | -2.772932 | 4.632997  |
| 51 | 1 | 0 | -0.356335 | -2.515611 | -1.728116 |
| 52 | 6 | 0 | 1.249947  | -1.764245 | -0.511047 |
| 53 | 6 | 0 | -3.955271 | 1.822526  | -4.408137 |
| 54 | 1 | 0 | -3.782071 | -0.330106 | -4.285111 |
| 55 | 1 | 0 | -4.492836 | 0.476564  | -2.827505 |
| 56 | 1 | 0 | -1.292386 | 1.813121  | -4.421651 |
| 57 | 1 | 0 | -0.220125 | 0.679072  | -3.515121 |
| 58 | 1 | 0 | -1.319286 | 0.040781  | -4.815033 |
| 59 | 6 | 0 | 2.506316  | -1.613536 | -1.418376 |
| 60 | 6 | 0 | 1.353041  | -3.086911 | 0.238014  |
| 61 | 1 | 0 | 1.202998  | -0.936150 | 0.207057  |
| 62 | 1 | 0 | -5.025087 | 1.857628  | -4.727658 |
| 63 | 1 | 0 | -3.739622 | 2.728797  | -3.789141 |
| 64 | 1 | 0 | -3.315721 | 1.860424  | -5.322855 |
| 65 | 8 | 0 | 2.863950  | -2.506010 | -2.190425 |
| 66 | 7 | 0 | 3.143362  | -0.416980 | -1.292554 |
| 67 | 6 | 0 | 2.513472  | -3.025600 | 1.213146  |
| 68 | 6 | 0 | 0.076233  | -3.422478 | 0.980516  |
| 69 | 1 | 0 | 1.560025  | -3.904449 | -0.512984 |
| 70 | 1 | 0 | 2.830592  | 0.270321  | -0.607882 |
| 71 | 6 | 0 | 4.361908  | -0.126625 | -2.045075 |
| 72 | 1 | 0 | 2.633635  | -4.013561 | 1.721048  |
| 73 | 1 | 0 | 3.466581  | -2.784624 | 0.680813  |
| 74 | 1 | 0 | 2.332611  | -2.246740 | 1.993244  |
| 75 | 1 | 0 | 0.242009  | -4.309732 | 1.639220  |
| 76 | 1 | 0 | -0.242172 | -2.563698 | 1.620031  |
| 77 | 1 | 0 | -0.752218 | -3.672020 | 0.270885  |
| 78 | 6 | 0 | 5.606013  | -0.524721 | -1.205204 |
| 79 | 6 | 0 | 4.531186  | 1.346664  | -2.379468 |
| 80 | 1 | 0 | 4.324818  | -0.716393 | -2.969663 |
| 81 | 8 | 0 | 5.704231  | -0.178123 | -0.019366 |
| 82 | 7 | 0 | 6.555660  | -1.236275 | -1.852036 |
| 83 | 6 | 0 | 3.462734  | 1.872933  | -3.268517 |
| 84 | 1 | 0 | 4.551844  | 1.945473  | -1.424260 |

|     |   |   |           |           |           |
|-----|---|---|-----------|-----------|-----------|
| 85  | 1 | 0 | 5.532824  | 1.471687  | -2.875584 |
| 86  | 1 | 0 | 6.450491  | -1.413786 | -2.843400 |
| 87  | 6 | 0 | 7.856157  | -1.544192 | -1.240655 |
| 88  | 6 | 0 | 2.267725  | 2.357617  | -2.717725 |
| 89  | 6 | 0 | 3.652129  | 1.917775  | -4.653271 |
| 90  | 6 | 0 | 8.925274  | -0.555898 | -1.785414 |
| 91  | 6 | 0 | 8.317465  | -2.969101 | -1.467877 |
| 92  | 1 | 0 | 7.729867  | -1.394350 | -0.161338 |
| 93  | 6 | 0 | 1.272831  | 2.881645  | -3.534597 |
| 94  | 1 | 0 | 2.110675  | 2.315483  | -1.624866 |
| 95  | 6 | 0 | 2.666905  | 2.439505  | -5.488265 |
| 96  | 1 | 0 | 4.587858  | 1.538777  | -5.092101 |
| 97  | 8 | 0 | 8.971079  | -0.259945 | -2.981892 |
| 98  | 7 | 0 | 9.779840  | -0.092227 | -0.835862 |
| 99  | 6 | 0 | 8.339657  | -3.391360 | -2.921882 |
| 100 | 1 | 0 | 9.350285  | -3.061494 | -1.034267 |
| 101 | 1 | 0 | 7.649740  | -3.665338 | -0.889799 |
| 102 | 6 | 0 | 1.477520  | 2.919506  | -4.924159 |
| 103 | 1 | 0 | 0.328726  | 3.257110  | -3.112280 |
| 104 | 1 | 0 | 2.818948  | 2.470557  | -6.575886 |
| 105 | 1 | 0 | 9.565012  | -0.279029 | 0.141116  |
| 106 | 6 | 0 | 10.860552 | 0.829090  | -1.153392 |
| 107 | 6 | 0 | 9.094538  | -4.692724 | -3.092102 |
| 108 | 1 | 0 | 7.290470  | -3.520867 | -3.298588 |
| 109 | 1 | 0 | 8.821607  | -2.586838 | -3.541151 |
| 110 | 8 | 0 | 0.452684  | 3.442639  | -5.680729 |
| 111 | 1 | 0 | 11.804928 | 0.479209  | -0.719365 |
| 112 | 1 | 0 | 10.959280 | 0.878472  | -2.239743 |
| 113 | 1 | 0 | 10.651302 | 1.837640  | -0.773128 |
| 114 | 6 | 0 | 9.083722  | -5.117320 | -4.559989 |
| 115 | 1 | 0 | 10.152378 | -4.567698 | -2.741348 |
| 116 | 1 | 0 | 8.622614  | -5.488189 | -2.457766 |
| 117 | 1 | 0 | 0.717460  | 3.398876  | -6.610793 |
| 118 | 7 | 0 | 9.816325  | -6.336606 | -4.806968 |
| 119 | 1 | 0 | 8.004979  | -5.186047 | -4.894992 |
| 120 | 1 | 0 | 9.567636  | -4.304938 | -5.174819 |
| 121 | 1 | 0 | 9.511650  | -7.069755 | -4.198234 |
| 122 | 1 | 0 | 9.696003  | -6.626766 | -5.756658 |
| 123 | 8 | 0 | 2.489190  | 1.530138  | 0.729271  |
| 124 | 6 | 0 | 2.397868  | 1.992481  | 1.871271  |
| 125 | 6 | 0 | 1.033388  | 2.010959  | 2.605221  |
| 126 | 7 | 0 | 3.447909  | 2.499650  | 2.564350  |
| 127 | 7 | 0 | -0.001766 | 2.211228  | 1.586571  |

|     |   |   |           |           |           |
|-----|---|---|-----------|-----------|-----------|
| 128 | 6 | 0 | 0.896105  | 0.718333  | 3.415907  |
| 129 | 1 | 0 | 0.968168  | 2.860088  | 3.297254  |
| 130 | 1 | 0 | 3.316871  | 2.736558  | 3.543052  |
| 131 | 6 | 0 | 4.843522  | 2.290662  | 2.147207  |
| 132 | 6 | 0 | -1.099381 | 2.975452  | 1.814707  |
| 133 | 1 | 0 | 0.052049  | 1.647814  | 0.734481  |
| 134 | 6 | 0 | 1.824303  | 0.735545  | 4.615792  |
| 135 | 6 | 0 | -0.533373 | 0.519540  | 3.882413  |
| 136 | 1 | 0 | 1.176721  | -0.152817 | 2.755425  |
| 137 | 6 | 0 | 5.511212  | 1.359111  | 3.195763  |
| 138 | 6 | 0 | 5.671231  | 3.563672  | 2.095482  |
| 139 | 1 | 0 | 4.822077  | 1.823541  | 1.156421  |
| 140 | 6 | 0 | -2.097332 | 3.048623  | 0.627685  |
| 141 | 8 | 0 | -1.339361 | 3.565251  | 2.876552  |
| 142 | 1 | 0 | 1.562865  | -0.101894 | 5.308554  |
| 143 | 1 | 0 | 2.891811  | 0.600189  | 4.315244  |
| 144 | 1 | 0 | 1.729337  | 1.694799  | 5.179895  |
| 145 | 1 | 0 | -0.581309 | -0.294424 | 4.645736  |
| 146 | 1 | 0 | -0.931203 | 1.462153  | 4.332893  |
| 147 | 1 | 0 | -1.192959 | 0.229708  | 3.029074  |
| 148 | 8 | 0 | 5.292078  | 1.522108  | 4.400725  |
| 149 | 7 | 0 | 6.357746  | 0.429489  | 2.678608  |
| 150 | 6 | 0 | 5.164778  | 4.551275  | 1.106430  |
| 151 | 1 | 0 | 5.710475  | 4.030579  | 3.117700  |
| 152 | 1 | 0 | 6.722392  | 3.268640  | 1.822504  |
| 153 | 7 | 0 | -3.443516 | 2.961182  | 1.228394  |
| 154 | 6 | 0 | -1.881225 | 4.315900  | -0.193858 |
| 155 | 1 | 0 | -1.972237 | 2.178220  | -0.026430 |
| 156 | 1 | 0 | 6.300137  | 0.211764  | 1.680248  |
| 157 | 6 | 0 | 7.052231  | -0.515941 | 3.551948  |
| 158 | 6 | 0 | 4.434052  | 5.668428  | 1.531659  |
| 159 | 6 | 0 | 5.434726  | 4.385942  | -0.256521 |
| 160 | 6 | 0 | -4.342648 | 2.010125  | 0.886191  |
| 161 | 1 | 0 | -3.601594 | 3.548261  | 2.039502  |
| 162 | 6 | 0 | -2.631111 | 4.211573  | -1.519567 |
| 163 | 6 | 0 | -0.404446 | 4.545225  | -0.447071 |
| 164 | 1 | 0 | -2.279384 | 5.200811  | 0.380833  |
| 165 | 6 | 0 | 8.539704  | -0.628607 | 3.134370  |
| 166 | 6 | 0 | 6.444095  | -1.906733 | 3.606050  |
| 167 | 1 | 0 | 6.983491  | -0.090708 | 4.562346  |
| 168 | 6 | 0 | 3.973372  | 6.609603  | 0.618064  |
| 169 | 1 | 0 | 4.219672  | 5.804872  | 2.602796  |
| 170 | 6 | 0 | 4.983522  | 5.316625  | -1.188044 |

|     |   |   |           |           |           |
|-----|---|---|-----------|-----------|-----------|
| 171 | 1 | 0 | 6.010172  | 3.510894  | -0.597023 |
| 172 | 6 | 0 | -5.591801 | 1.896872  | 1.773659  |
| 173 | 8 | 0 | -4.179594 | 1.232680  | -0.061020 |
| 174 | 6 | 0 | -2.986128 | 5.566206  | -2.076366 |
| 175 | 1 | 0 | -1.993204 | 3.655869  | -2.259902 |
| 176 | 1 | 0 | -3.569776 | 3.609613  | -1.387110 |
| 177 | 1 | 0 | -0.271982 | 5.384096  | -1.173278 |
| 178 | 1 | 0 | 0.120926  | 4.817069  | 0.500204  |
| 179 | 1 | 0 | 0.074867  | 3.630282  | -0.876086 |
| 180 | 8 | 0 | 8.908986  | -0.541501 | 1.959698  |
| 181 | 7 | 0 | 9.392375  | -0.860800 | 4.168479  |
| 182 | 6 | 0 | 6.452524  | -2.634239 | 2.278836  |
| 183 | 1 | 0 | 7.015830  | -2.507089 | 4.364109  |
| 184 | 1 | 0 | 5.386822  | -1.826531 | 3.977777  |
| 185 | 6 | 0 | 4.250503  | 6.427335  | -0.746911 |
| 186 | 1 | 0 | 3.399286  | 7.488215  | 0.943138  |
| 187 | 1 | 0 | 5.195253  | 5.180572  | -2.257824 |
| 188 | 6 | 0 | -5.358128 | 0.911823  | 2.950713  |
| 189 | 7 | 0 | -6.684174 | 1.419716  | 0.935757  |
| 190 | 1 | 0 | -5.876194 | 2.875391  | 2.177506  |
| 191 | 1 | 0 | -3.500757 | 5.450121  | -3.061216 |
| 192 | 1 | 0 | -3.669938 | 6.113577  | -1.383361 |
| 193 | 1 | 0 | -2.070650 | 6.187767  | -2.228439 |
| 194 | 1 | 0 | 9.008127  | -0.880043 | 5.103915  |
| 195 | 6 | 0 | 10.822868 | -1.083683 | 3.999650  |
| 196 | 6 | 0 | 5.825367  | -4.005078 | 2.417258  |
| 197 | 1 | 0 | 5.889566  | -2.040952 | 1.506937  |
| 198 | 1 | 0 | 7.508873  | -2.729176 | 1.909088  |
| 199 | 8 | 0 | 3.772065  | 7.390576  | -1.605155 |
| 200 | 6 | 0 | -4.364379 | 1.392835  | 4.019652  |
| 201 | 1 | 0 | -6.335396 | 0.750341  | 3.418276  |
| 202 | 1 | 0 | -5.024411 | -0.051274 | 2.551876  |
| 203 | 6 | 0 | -7.974677 | 1.679131  | 1.250498  |
| 204 | 1 | 0 | -6.458929 | 0.773823  | 0.173678  |
| 205 | 1 | 0 | 11.124035 | -2.030262 | 4.462836  |
| 206 | 1 | 0 | 11.033489 | -1.126350 | 2.929659  |
| 207 | 1 | 0 | 11.405120 | -0.267147 | 4.443503  |
| 208 | 6 | 0 | 5.949997  | -4.778459 | 1.105027  |
| 209 | 1 | 0 | 6.324744  | -4.575622 | 3.242985  |
| 210 | 1 | 0 | 4.742323  | -3.891390 | 2.691786  |
| 211 | 1 | 0 | 3.999895  | 7.124800  | -2.507972 |
| 212 | 6 | 0 | -4.182880 | 0.344223  | 5.115296  |
| 213 | 1 | 0 | -3.367325 | 1.562030  | 3.591072  |

|     |   |   |            |           |           |
|-----|---|---|------------|-----------|-----------|
| 214 | 1 | 0 | -4.693719  | 2.346011  | 4.453271  |
| 215 | 6 | 0 | -9.030146  | 1.068935  | 0.292704  |
| 216 | 8 | 0 | -8.325524  | 2.347308  | 2.232147  |
| 217 | 7 | 0 | 5.347084   | -6.089568 | 1.157281  |
| 218 | 1 | 0 | 5.517977   | -4.134648 | 0.280185  |
| 219 | 1 | 0 | 7.044389   | -4.923009 | 0.872462  |
| 220 | 7 | 0 | -4.146567  | 0.822596  | 6.393970  |
| 221 | 8 | 0 | -4.059603  | -0.856395 | 4.867661  |
| 222 | 7 | 0 | -10.159490 | 0.672200  | 1.145229  |
| 223 | 6 | 0 | -9.383960  | 2.087191  | -0.789973 |
| 224 | 1 | 0 | -8.634884  | 0.169443  | -0.191948 |
| 225 | 1 | 0 | 4.399853   | -6.035279 | 1.476678  |
| 226 | 1 | 0 | 5.362022   | -6.512679 | 0.250613  |
| 227 | 1 | 0 | -4.210202  | 1.809208  | 6.595775  |
| 228 | 1 | 0 | -3.965062  | 0.174906  | 7.149337  |
| 229 | 6 | 0 | -10.827843 | -0.502143 | 1.031867  |
| 230 | 1 | 0 | -10.347322 | 1.295946  | 1.922264  |
| 231 | 6 | 0 | -8.173229  | 2.352651  | -1.664959 |
| 232 | 6 | 0 | -10.545570 | 1.600297  | -1.633823 |
| 233 | 1 | 0 | -9.686880  | 3.053576  | -0.294118 |
| 234 | 6 | 0 | -11.907986 | -0.747818 | 2.076022  |
| 235 | 8 | 0 | -10.592930 | -1.341849 | 0.150081  |
| 236 | 1 | 0 | -8.485759  | 2.866196  | -2.606280 |
| 237 | 1 | 0 | -7.444177  | 3.013864  | -1.138191 |
| 238 | 1 | 0 | -7.655668  | 1.397732  | -1.935245 |
| 239 | 1 | 0 | -10.676825 | 2.260962  | -2.524740 |
| 240 | 1 | 0 | -10.368186 | 0.554088  | -1.986282 |
| 241 | 1 | 0 | -11.495614 | 1.616098  | -1.047743 |
| 242 | 1 | 0 | -12.858177 | -0.919837 | 1.560821  |
| 243 | 1 | 0 | -11.660471 | -1.661059 | 2.626754  |
| 244 | 1 | 0 | -12.025686 | 0.078351  | 2.783758  |

P Pl (Ac-VQIVYK-NHMe)<sub>3</sub>

|    |   |   |            |           |           |
|----|---|---|------------|-----------|-----------|
| 1  | 8 | 0 | -7.917925  | -6.546011 | 3.650244  |
| 2  | 6 | 0 | -8.707511  | -5.638651 | 3.356630  |
| 3  | 7 | 0 | -8.785194  | -5.102871 | 2.105387  |
| 4  | 6 | 0 | -9.675734  | -5.051434 | 4.373076  |
| 5  | 6 | 0 | -7.863266  | -5.559894 | 1.054095  |
| 6  | 1 | 0 | -9.329644  | -4.256828 | 1.928957  |
| 7  | 1 | 0 | -10.351891 | -5.844927 | 4.708679  |
| 8  | 1 | 0 | -9.106370  | -4.713407 | 5.244702  |
| 9  | 1 | 0 | -10.260059 | -4.220170 | 3.967879  |
| 10 | 6 | 0 | -6.568676  | -4.717527 | 1.172595  |
| 11 | 6 | 0 | -8.427847  | -5.436824 | -0.352749 |
| 12 | 1 | 0 | -7.638392  | -6.612732 | 1.266396  |
| 13 | 7 | 0 | -5.624917  | -5.247676 | 1.982454  |
| 14 | 8 | 0 | -6.455368  | -3.615186 | 0.608657  |
| 15 | 6 | 0 | -7.427890  | -5.982038 | -1.355032 |
| 16 | 6 | 0 | -9.748120  | -6.167503 | -0.486182 |
| 17 | 1 | 0 | -8.594047  | -4.341851 | -0.577105 |
| 18 | 1 | 0 | -5.851782  | -6.108197 | 2.473132  |
| 19 | 6 | 0 | -4.355394  | -4.585977 | 2.283534  |
| 20 | 1 | 0 | -7.832267  | -5.873446 | -2.390152 |
| 21 | 1 | 0 | -6.464135  | -5.418521 | -1.291473 |
| 22 | 1 | 0 | -7.226053  | -7.063631 | -1.165551 |
| 23 | 1 | 0 | -10.074602 | -6.167112 | -1.554631 |
| 24 | 1 | 0 | -9.648804  | -7.226424 | -0.146352 |
| 25 | 1 | 0 | -10.541827 | -5.670618 | 0.121613  |
| 26 | 6 | 0 | -3.238363  | -5.273528 | 1.464629  |
| 27 | 6 | 0 | -4.051341  | -4.648993 | 3.790276  |
| 28 | 1 | 0 | -4.457168  | -3.546898 | 1.960760  |
| 29 | 8 | 0 | -2.960330  | -6.462780 | 1.628523  |
| 30 | 7 | 0 | -2.613985  | -4.453844 | 0.570891  |
| 31 | 6 | 0 | -2.818400  | -3.807925 | 4.173193  |
| 32 | 1 | 0 | -4.931973  | -4.279337 | 4.330620  |
| 33 | 1 | 0 | -3.886865  | -5.688968 | 4.092497  |
| 34 | 1 | 0 | -2.913088  | -3.482382 | 0.479111  |
| 35 | 6 | 0 | -1.563519  | -4.946970 | -0.323948 |
| 36 | 6 | 0 | -2.568594  | -3.863455 | 5.681967  |
| 37 | 1 | 0 | -1.925264  | -4.219058 | 3.686811  |
| 38 | 1 | 0 | -2.942130  | -2.771665 | 3.837522  |
| 39 | 6 | 0 | -0.288387  | -4.124694 | -0.012985 |
| 40 | 6 | 0 | -1.875060  | -4.820974 | -1.814462 |
| 41 | 1 | 0 | -1.425915  | -6.006451 | -0.075186 |

|    |   |   |           |           |           |
|----|---|---|-----------|-----------|-----------|
| 42 | 8 | 0 | -2.284370 | -4.914767 | 6.257268  |
| 43 | 7 | 0 | -2.681527 | -2.667264 | 6.333951  |
| 44 | 8 | 0 | -0.295928 | -2.890042 | -0.118783 |
| 45 | 7 | 0 | 0.788390  | -4.829646 | 0.413190  |
| 46 | 6 | 0 | -3.203423 | -5.477442 | -2.165697 |
| 47 | 6 | 0 | -0.745644 | -5.446951 | -2.609334 |
| 48 | 1 | 0 | -1.937887 | -3.723957 | -2.073755 |
| 49 | 1 | 0 | -2.590487 | -2.685136 | 7.340737  |
| 50 | 1 | 0 | -2.998882 | -1.817559 | 5.873955  |
| 51 | 1 | 0 | 0.745923  | -5.841187 | 0.427822  |
| 52 | 6 | 0 | 2.070255  | -4.197412 | 0.766059  |
| 53 | 6 | 0 | -3.604479 | -5.224661 | -3.597373 |
| 54 | 1 | 0 | -3.130111 | -6.581584 | -1.980612 |
| 55 | 1 | 0 | -4.013650 | -5.080395 | -1.497654 |
| 56 | 1 | 0 | -0.922571 | -5.319855 | -3.706556 |
| 57 | 1 | 0 | 0.229128  | -4.956115 | -2.367186 |
| 58 | 1 | 0 | -0.663389 | -6.538207 | -2.387835 |
| 59 | 6 | 0 | 3.139829  | -4.644873 | -0.268090 |
| 60 | 6 | 0 | 2.560960  | -4.563789 | 2.163287  |
| 61 | 1 | 0 | 1.910877  | -3.115603 | 0.711920  |
| 62 | 1 | 0 | -4.648121 | -5.584825 | -3.768805 |
| 63 | 1 | 0 | -3.564921 | -4.132832 | -3.832090 |
| 64 | 1 | 0 | -2.929684 | -5.761156 | -4.307118 |
| 65 | 8 | 0 | 3.335383  | -5.838027 | -0.509532 |
| 66 | 7 | 0 | 3.813197  | -3.612241 | -0.849475 |
| 67 | 6 | 0 | 3.909916  | -3.917018 | 2.415297  |
| 68 | 6 | 0 | 1.571172  | -4.127030 | 3.224014  |
| 69 | 1 | 0 | 2.685433  | -5.683370 | 2.223429  |
| 70 | 1 | 0 | 3.584133  | -2.653365 | -0.583595 |
| 71 | 6 | 0 | 4.919922  | -3.829628 | -1.774085 |
| 72 | 1 | 0 | 4.207967  | -4.058747 | 3.482075  |
| 73 | 1 | 0 | 4.694330  | -4.379281 | 1.767751  |
| 74 | 1 | 0 | 3.870078  | -2.821761 | 2.196447  |
| 75 | 1 | 0 | 1.979872  | -4.348252 | 4.239939  |
| 76 | 1 | 0 | 1.377459  | -3.029212 | 3.150792  |
| 77 | 1 | 0 | 0.599672  | -4.666889 | 3.117056  |
| 78 | 6 | 0 | 6.208482  | -3.199255 | -1.183222 |
| 79 | 6 | 0 | 4.735772  | -3.208283 | -3.152765 |
| 80 | 1 | 0 | 5.029834  | -4.916058 | -1.883298 |
| 81 | 8 | 0 | 6.155805  | -2.156020 | -0.518623 |
| 82 | 7 | 0 | 7.362921  | -3.846154 | -1.469386 |
| 83 | 6 | 0 | 3.594751  | -3.789520 | -3.907257 |
| 84 | 1 | 0 | 4.591302  | -2.096409 | -3.049964 |



|     |   |   |           |           |           |
|-----|---|---|-----------|-----------|-----------|
| 85  | 1 | 0 | 5.686215  | -3.369493 | -3.733059 |
| 86  | 1 | 0 | 7.342793  | -4.611363 | -2.134417 |
| 87  | 6 | 0 | 8.681796  | -3.251680 | -1.204854 |
| 88  | 6 | 0 | 2.320911  | -3.213684 | -3.810360 |
| 89  | 6 | 0 | 3.787436  | -4.896988 | -4.740001 |
| 90  | 6 | 0 | 9.289803  | -2.771243 | -2.551533 |
| 91  | 6 | 0 | 9.653305  | -4.188623 | -0.516957 |
| 92  | 1 | 0 | 8.511949  | -2.391102 | -0.547387 |
| 93  | 6 | 0 | 1.251084  | -3.727734 | -4.533626 |
| 94  | 1 | 0 | 2.161342  | -2.347358 | -3.147982 |
| 95  | 6 | 0 | 2.728316  | -5.428498 | -5.471361 |
| 96  | 1 | 0 | 4.784685  | -5.356229 | -4.819577 |
| 97  | 8 | 0 | 9.143941  | -3.429126 | -3.586258 |
| 98  | 7 | 0 | 9.985623  | -1.609711 | -2.457207 |
| 99  | 6 | 0 | 9.844276  | -5.511949 | -1.227729 |
| 100 | 1 | 0 | 10.639879 | -3.655418 | -0.441666 |
| 101 | 1 | 0 | 9.298621  | -4.379484 | 0.532002  |
| 102 | 6 | 0 | 1.460352  | -4.841198 | -5.364219 |
| 103 | 1 | 0 | 0.247788  | -3.284199 | -4.457629 |
| 104 | 1 | 0 | 2.883438  | -6.301678 | -6.120001 |
| 105 | 1 | 0 | 9.911283  | -1.072718 | -1.593989 |
| 106 | 6 | 0 | 10.651816 | -1.011853 | -3.604124 |
| 107 | 6 | 0 | 11.025732 | -6.264638 | -0.653575 |
| 108 | 1 | 0 | 8.918913  | -6.138031 | -1.123248 |
| 109 | 1 | 0 | 10.003069 | -5.331549 | -2.325387 |
| 110 | 8 | 0 | 0.361855  | -5.309628 | -6.049500 |
| 111 | 1 | 0 | 11.680884 | -0.732724 | -3.347988 |
| 112 | 1 | 0 | 10.667429 | -1.745057 | -4.413168 |
| 113 | 1 | 0 | 10.121387 | -0.115846 | -3.952925 |
| 114 | 6 | 0 | 11.181443 | -7.612540 | -1.356189 |
| 115 | 1 | 0 | 11.960886 | -5.659102 | -0.782121 |
| 116 | 1 | 0 | 10.875284 | -6.419442 | 0.447062  |
| 117 | 1 | 0 | 0.634918  | -6.091898 | -6.550214 |
| 118 | 7 | 0 | 12.318232 | -8.371660 | -0.891601 |
| 119 | 1 | 0 | 10.208366 | -8.179027 | -1.242610 |
| 120 | 1 | 0 | 11.328673 | -7.430886 | -2.459589 |
| 121 | 1 | 0 | 12.318422 | -8.446615 | 0.106058  |
| 122 | 1 | 0 | 12.308517 | -9.289112 | -1.290035 |
| 123 | 8 | 0 | 2.850624  | -1.032766 | -0.002207 |
| 124 | 6 | 0 | 2.539455  | 0.162125  | 0.090708  |
| 125 | 6 | 0 | 1.193019  | 0.582038  | 0.732842  |
| 126 | 7 | 0 | 3.317329  | 1.185985  | -0.330729 |
| 127 | 7 | 0 | 0.096137  | -0.059050 | -0.007166 |

|     |   |   |           |           |           |
|-----|---|---|-----------|-----------|-----------|
| 128 | 6 | 0 | 1.234907  | 0.207325  | 2.212444  |
| 129 | 1 | 0 | 1.048791  | 1.663376  | 0.638085  |
| 130 | 1 | 0 | 2.967274  | 2.143338  | -0.264152 |
| 131 | 6 | 0 | 4.652830  | 0.974856  | -0.904494 |
| 132 | 6 | 0 | -0.848847 | 0.661278  | -0.651109 |
| 133 | 1 | 0 | 0.024236  | -1.080920 | 0.009847  |
| 134 | 6 | 0 | 2.329992  | 0.991099  | 2.909823  |
| 135 | 6 | 0 | -0.094345 | 0.470484  | 2.889832  |
| 136 | 1 | 0 | 1.471143  | -0.894019 | 2.295097  |
| 137 | 6 | 0 | 5.711737  | 1.421786  | 0.136645  |
| 138 | 6 | 0 | 4.908782  | 1.783528  | -2.165093 |
| 139 | 1 | 0 | 4.753339  | -0.094698 | -1.118840 |
| 140 | 6 | 0 | -2.004490 | -0.167897 | -1.270428 |
| 141 | 8 | 0 | -0.852313 | 1.902500  | -0.727037 |
| 142 | 1 | 0 | 2.342170  | 0.741223  | 3.998681  |
| 143 | 1 | 0 | 3.331810  | 0.743398  | 2.482383  |
| 144 | 1 | 0 | 2.158003  | 2.089795  | 2.801624  |
| 145 | 1 | 0 | 0.005135  | 0.329259  | 3.993652  |
| 146 | 1 | 0 | -0.434694 | 1.516757  | 2.695363  |
| 147 | 1 | 0 | -0.876913 | -0.235645 | 2.520746  |
| 148 | 8 | 0 | 5.708334  | 2.588956  | 0.566401  |
| 149 | 7 | 0 | 6.598355  | 0.477418  | 0.512871  |
| 150 | 6 | 0 | 3.949823  | 1.481241  | -3.259714 |
| 151 | 1 | 0 | 4.863328  | 2.882632  | -1.919182 |
| 152 | 1 | 0 | 5.957604  | 1.559991  | -2.502980 |
| 153 | 7 | 0 | -3.242003 | 0.245344  | -0.583563 |
| 154 | 6 | 0 | -2.030147 | 0.056753  | -2.778754 |
| 155 | 1 | 0 | -1.861056 | -1.234156 | -1.062738 |
| 156 | 1 | 0 | 6.508925  | -0.476749 | 0.152379  |
| 157 | 6 | 0 | 7.656789  | 0.775214  | 1.483224  |
| 158 | 6 | 0 | 2.720762  | 2.153709  | -3.320268 |
| 159 | 6 | 0 | 4.272022  | 0.545236  | -4.247350 |
| 160 | 6 | 0 | -3.915017 | -0.576871 | 0.254931  |
| 161 | 1 | 0 | -3.589703 | 1.193486  | -0.731868 |
| 162 | 6 | 0 | -3.124709 | -0.772046 | -3.438832 |
| 163 | 6 | 0 | -0.673557 | -0.292263 | -3.360291 |
| 164 | 1 | 0 | -2.232584 | 1.149667  | -2.976308 |
| 165 | 6 | 0 | 9.044188  | 0.770118  | 0.791043  |
| 166 | 6 | 0 | 7.680642  | -0.142509 | 2.688351  |
| 167 | 1 | 0 | 7.458446  | 1.789214  | 1.848887  |
| 168 | 6 | 0 | 1.821355  | 1.897002  | -4.348142 |
| 169 | 1 | 0 | 2.460151  | 2.889648  | -2.539414 |
| 170 | 6 | 0 | 3.385369  | 0.276238  | -5.287275 |

|     |   |   |           |           |           |
|-----|---|---|-----------|-----------|-----------|
| 171 | 1 | 0 | 5.234559  | 0.012284  | -4.205829 |
| 172 | 6 | 0 | -5.185746 | 0.017955  | 0.888163  |
| 173 | 8 | 0 | -3.568070 | -1.733775 | 0.522658  |
| 174 | 6 | 0 | -3.367554 | -0.356859 | -4.868054 |
| 175 | 1 | 0 | -2.840026 | -1.857962 | -3.400929 |
| 176 | 1 | 0 | -4.085201 | -0.663204 | -2.868450 |
| 177 | 1 | 0 | -0.677888 | -0.149374 | -4.468958 |
| 178 | 1 | 0 | 0.119459  | 0.373485  | -2.936684 |
| 179 | 1 | 0 | -0.406925 | -1.354584 | -3.138443 |
| 180 | 8 | 0 | 9.381604  | -0.109711 | -0.013895 |
| 181 | 7 | 0 | 9.844390  | 1.796123  | 1.161623  |
| 182 | 6 | 0 | 7.727528  | -1.619228 | 2.362800  |
| 183 | 1 | 0 | 8.575758  | 0.133135  | 3.309473  |
| 184 | 1 | 0 | 6.767544  | 0.067035  | 3.311979  |
| 185 | 6 | 0 | 2.158110  | 0.951312  | -5.331424 |
| 186 | 1 | 0 | 0.853777  | 2.418032  | -4.400535 |
| 187 | 1 | 0 | 3.641540  | -0.462650 | -6.059371 |
| 188 | 6 | 0 | -5.082878 | 0.015912  | 2.426847  |
| 189 | 7 | 0 | -6.332489 | -0.778019 | 0.452767  |
| 190 | 1 | 0 | -5.343965 | 1.035090  | 0.526173  |
| 191 | 1 | 0 | -4.251134 | -0.902774 | -5.279322 |
| 192 | 1 | 0 | -3.568662 | 0.740445  | -4.931900 |
| 193 | 1 | 0 | -2.484618 | -0.588698 | -5.511254 |
| 194 | 1 | 0 | 9.445302  | 2.534492  | 1.738962  |
| 195 | 6 | 0 | 11.196715 | 1.953143  | 0.646103  |
| 196 | 6 | 0 | 7.949817  | -2.430149 | 3.622740  |
| 197 | 1 | 0 | 6.769072  | -1.937853 | 1.869798  |
| 198 | 1 | 0 | 8.553451  | -1.817124 | 1.627374  |
| 199 | 8 | 0 | 1.223577  | 0.732389  | -6.318031 |
| 200 | 6 | 0 | -3.975413 | 0.944591  | 2.960663  |
| 201 | 1 | 0 | -6.054102 | 0.332821  | 2.826400  |
| 202 | 1 | 0 | -4.898573 | -1.004499 | 2.777493  |
| 203 | 6 | 0 | -7.428630 | -0.218882 | -0.099875 |
| 204 | 1 | 0 | -6.290601 | -1.798099 | 0.566172  |
| 205 | 1 | 0 | 11.817254 | 2.454757  | 1.395392  |
| 206 | 1 | 0 | 11.617652 | 0.967990  | 0.430838  |
| 207 | 1 | 0 | 11.213695 | 2.545135  | -0.278827 |
| 208 | 6 | 0 | 7.722987  | -3.915035 | 3.344505  |
| 209 | 1 | 0 | 8.992634  | -2.263496 | 3.999999  |
| 210 | 1 | 0 | 7.245695  | -2.083875 | 4.425210  |
| 211 | 1 | 0 | 1.563241  | 0.038121  | -6.901387 |
| 212 | 6 | 0 | -3.876645 | 0.849065  | 4.480542  |
| 213 | 1 | 0 | -3.000360 | 0.633745  | 2.562636  |

|     |   |   |            |           |           |
|-----|---|---|------------|-----------|-----------|
| 214 | 1 | 0 | -4.153001  | 1.979376  | 2.646175  |
| 215 | 6 | 0 | -8.582499  | -1.197034 | -0.436580 |
| 216 | 8 | 0 | -7.550576  | 0.999769  | -0.323847 |
| 217 | 7 | 0 | 8.064208   | -4.765706 | 4.460072  |
| 218 | 1 | 0 | 6.647438   | -4.045654 | 3.012237  |
| 219 | 1 | 0 | 8.374337   | -4.225252 | 2.477275  |
| 220 | 7 | 0 | -4.147151  | 1.987686  | 5.169558  |
| 221 | 8 | 0 | -3.571264  | -0.209971 | 5.041395  |
| 222 | 7 | 0 | -9.799028  | -0.724116 | 0.240998  |
| 223 | 6 | 0 | -8.698957  | -1.291947 | -1.955814 |
| 224 | 1 | 0 | -8.361602  | -2.191455 | -0.034084 |
| 225 | 1 | 0 | 7.628339   | -4.447847 | 5.302619  |
| 226 | 1 | 0 | 7.779135   | -5.707164 | 4.277826  |
| 227 | 1 | 0 | -4.413094  | 2.858868  | 4.716526  |
| 228 | 1 | 0 | -4.113482  | 1.941042  | 6.179311  |
| 229 | 6 | 0 | -10.460431 | -1.480327 | 1.156987  |
| 230 | 1 | 0 | -10.185351 | 0.184923  | -0.015598 |
| 231 | 6 | 0 | -7.443370  | -1.935640 | -2.514492 |
| 232 | 6 | 0 | -9.919142  | -2.085619 | -2.374411 |
| 233 | 1 | 0 | -8.788358  | -0.247206 | -2.374974 |
| 234 | 6 | 0 | -11.691477 | -0.833467 | 1.773180  |
| 235 | 8 | 0 | -10.100001 | -2.617001 | 1.499063  |
| 236 | 1 | 0 | -7.556968  | -2.106515 | -3.611871 |
| 237 | 1 | 0 | -6.556884  | -1.275642 | -2.351631 |
| 238 | 1 | 0 | -7.249352  | -2.918883 | -2.016286 |
| 239 | 1 | 0 | -9.896234  | -2.266781 | -3.476588 |
| 240 | 1 | 0 | -9.943678  | -3.073698 | -1.853439 |
| 241 | 1 | 0 | -10.857337 | -1.530833 | -2.133070 |
| 242 | 1 | 0 | -12.532718 | -1.526131 | 1.669327  |
| 243 | 1 | 0 | -11.508635 | -0.697825 | 2.844970  |
| 244 | 1 | 0 | -11.939064 | 0.127926  | 1.317331  |
| 245 | 1 | 0 | -5.374315  | 7.651160  | 3.548340  |
| 246 | 7 | 0 | -5.235562  | 6.778759  | 4.035815  |
| 247 | 6 | 0 | -5.027158  | 5.605535  | 3.371533  |
| 248 | 1 | 0 | -5.245391  | 6.770242  | 5.047279  |
| 249 | 6 | 0 | -5.012024  | 5.685524  | 1.849063  |
| 250 | 8 | 0 | -4.856504  | 4.542208  | 3.972012  |
| 251 | 6 | 0 | -6.049338  | 4.722893  | 1.242129  |
| 252 | 1 | 0 | -3.995905  | 5.410870  | 1.537335  |
| 253 | 1 | 0 | -5.189541  | 6.712286  | 1.505559  |
| 254 | 6 | 0 | -6.029702  | 4.661926  | -0.304149 |
| 255 | 1 | 0 | -7.057329  | 5.033364  | 1.541101  |
| 256 | 1 | 0 | -5.885235  | 3.716418  | 1.639898  |

|     |   |   |            |          |           |
|-----|---|---|------------|----------|-----------|
| 257 | 7 | 0 | -7.111134  | 3.819216 | -0.792222 |
| 258 | 6 | 0 | -4.696433  | 4.080194 | -0.800648 |
| 259 | 1 | 0 | -6.196926  | 5.664576 | -0.711276 |
| 260 | 6 | 0 | -8.273181  | 4.350219 | -1.250248 |
| 261 | 1 | 0 | -7.043689  | 2.805377 | -0.657489 |
| 262 | 8 | 0 | -4.471199  | 2.867907 | -0.696834 |
| 263 | 7 | 0 | -3.811978  | 4.967876 | -1.310865 |
| 264 | 6 | 0 | -9.328694  | 3.311861 | -1.704239 |
| 265 | 8 | 0 | -8.509709  | 5.563246 | -1.307089 |
| 266 | 1 | 0 | -4.027447  | 5.957627 | -1.290050 |
| 267 | 6 | 0 | -2.428603  | 4.611587 | -1.676651 |
| 268 | 7 | 0 | -10.623097 | 3.794056 | -1.203300 |
| 269 | 6 | 0 | -9.260437  | 3.153134 | -3.221566 |
| 270 | 1 | 0 | -9.134831  | 2.339378 | -1.239545 |
| 271 | 6 | 0 | -1.505277  | 5.421984 | -0.723893 |
| 272 | 6 | 0 | -2.079399  | 4.922000 | -3.129150 |
| 273 | 1 | 0 | -2.309245  | 3.536725 | -1.503777 |
| 274 | 1 | 0 | -10.786667 | 4.789752 | -1.293946 |
| 275 | 6 | 0 | -11.486188 | 3.022029 | -0.494474 |
| 276 | 6 | 0 | -7.901411  | 2.607637 | -3.618436 |
| 277 | 6 | 0 | -10.352766 | 2.228557 | -3.721020 |
| 278 | 1 | 0 | -9.398027  | 4.163969 | -3.701180 |
| 279 | 8 | 0 | -1.767358  | 6.599464 | -0.450363 |
| 280 | 7 | 0 | -0.441864  | 4.732707 | -0.232929 |
| 281 | 6 | 0 | -2.916464  | 4.076248 | -4.083179 |
| 282 | 6 | 0 | -0.601776  | 4.665655 | -3.360171 |
| 283 | 1 | 0 | -2.291236  | 6.010698 | -3.331826 |
| 284 | 6 | 0 | -12.731304 | 3.729199 | 0.022380  |
| 285 | 8 | 0 | -11.297876 | 1.818338 | -0.268685 |
| 286 | 1 | 0 | -7.917268  | 2.280363 | -4.686077 |
| 287 | 1 | 0 | -7.113495  | 3.390557 | -3.507408 |
| 288 | 1 | 0 | -7.626630  | 1.731069 | -2.980062 |
| 289 | 1 | 0 | -10.217459 | 2.031815 | -4.812243 |
| 290 | 1 | 0 | -10.319922 | 1.253523 | -3.175847 |
| 291 | 1 | 0 | -11.360975 | 2.683440 | -3.572542 |
| 292 | 1 | 0 | -0.381552  | 3.724359 | -0.399917 |
| 293 | 6 | 0 | 0.488595   | 5.343069 | 0.721277  |
| 294 | 6 | 0 | -2.966152  | 4.669230 | -5.468652 |
| 295 | 1 | 0 | -2.486903  | 3.039460 | -4.129739 |
| 296 | 1 | 0 | -3.965441  | 3.977147 | -3.698557 |
| 297 | 1 | 0 | -0.377999  | 4.661870 | -4.454495 |
| 298 | 1 | 0 | 0.014931   | 5.464308 | -2.881987 |
| 299 | 1 | 0 | -0.300836  | 3.676025 | -2.933671 |

|     |   |   |            |          |           |
|-----|---|---|------------|----------|-----------|
| 300 | 1 | 0 | -13.613102 | 3.225350 | -0.385934 |
| 301 | 1 | 0 | -12.765447 | 3.624437 | 1.111426  |
| 302 | 1 | 0 | -12.770563 | 4.790989 | -0.239474 |
| 303 | 6 | 0 | 1.927960   | 4.934364 | 0.320313  |
| 304 | 6 | 0 | 0.262431   | 4.939746 | 2.181631  |
| 305 | 1 | 0 | 0.350437   | 6.428211 | 0.637692  |
| 306 | 1 | 0 | -3.585213  | 4.023672 | -6.137950 |
| 307 | 1 | 0 | -3.419389  | 5.689902 | -5.446177 |
| 308 | 1 | 0 | -1.943341  | 4.750513 | -5.909505 |
| 309 | 8 | 0 | 2.165427   | 3.799416 | -0.109226 |
| 310 | 7 | 0 | 2.875370   | 5.890493 | 0.487920  |
| 311 | 6 | 0 | 1.057885   | 5.835837 | 3.111640  |
| 312 | 6 | 0 | -1.208875  | 5.008620 | 2.543671  |
| 313 | 1 | 0 | 0.610945   | 3.874774 | 2.318575  |
| 314 | 1 | 0 | 2.618617   | 6.739800 | 0.981604  |
| 315 | 6 | 0 | 4.317596   | 5.601675 | 0.449517  |
| 316 | 1 | 0 | 0.761303   | 5.639592 | 4.171197  |
| 317 | 1 | 0 | 2.155965   | 5.647958 | 3.028091  |
| 318 | 1 | 0 | 0.862428   | 6.912764 | 2.889143  |
| 319 | 1 | 0 | -1.337330  | 4.947499 | 3.651490  |
| 320 | 1 | 0 | -1.655537  | 5.967301 | 2.181850  |
| 321 | 1 | 0 | -1.770424  | 4.159294 | 2.084355  |
| 322 | 6 | 0 | 4.867427   | 5.785638 | 1.890447  |
| 323 | 6 | 0 | 5.110930   | 6.541652 | -0.443614 |
| 324 | 1 | 0 | 4.447539   | 4.569995 | 0.105420  |
| 325 | 8 | 0 | 4.443054   | 6.700356 | 2.604416  |
| 326 | 7 | 0 | 5.856902   | 4.925391 | 2.255085  |
| 327 | 6 | 0 | 4.696029   | 6.490052 | -1.870057 |
| 328 | 1 | 0 | 5.016916   | 7.594989 | -0.060627 |
| 329 | 1 | 0 | 6.194022   | 6.249249 | -0.357049 |
| 330 | 1 | 0 | 6.000977   | 4.068537 | 1.712360  |
| 331 | 6 | 0 | 6.462677   | 5.045358 | 3.581948  |
| 332 | 6 | 0 | 3.757664   | 7.404542 | -2.366946 |
| 333 | 6 | 0 | 5.259928   | 5.546647 | -2.735500 |
| 334 | 6 | 0 | 7.960178   | 4.667780 | 3.521241  |
| 335 | 6 | 0 | 5.783996   | 4.256690 | 4.687985  |
| 336 | 1 | 0 | 6.368264   | 6.105486 | 3.855050  |
| 337 | 6 | 0 | 3.380339   | 7.383927 | -3.704486 |
| 338 | 1 | 0 | 3.310797   | 8.148428 | -1.689513 |
| 339 | 6 | 0 | 4.897370   | 5.509658 | -4.079194 |
| 340 | 1 | 0 | 5.999091   | 4.826140 | -2.351819 |
| 341 | 8 | 0 | 8.402824   | 3.802625 | 2.758376  |
| 342 | 7 | 0 | 8.743271   | 5.342408 | 4.402913  |

|     |   |   |           |           |           |
|-----|---|---|-----------|-----------|-----------|
| 343 | 6 | 0 | 5.747589  | 2.760363  | 4.464463  |
| 344 | 1 | 0 | 6.320838  | 4.476269  | 5.650248  |
| 345 | 1 | 0 | 4.732339  | 4.637901  | 4.801847  |
| 346 | 6 | 0 | 3.954975  | 6.429239  | -4.560270 |
| 347 | 1 | 0 | 2.644704  | 8.096788  | -4.102002 |
| 348 | 1 | 0 | 5.340687  | 4.764816  | -4.754713 |
| 349 | 1 | 0 | 8.320813  | 6.080997  | 4.949250  |
| 350 | 6 | 0 | 10.169388 | 5.082935  | 4.562796  |
| 351 | 6 | 0 | 5.169589  | 2.065456  | 5.680035  |
| 352 | 1 | 0 | 5.126999  | 2.521317  | 3.559386  |
| 353 | 1 | 0 | 6.784231  | 2.379844  | 4.257990  |
| 354 | 8 | 0 | 3.547810  | 6.458091  | -5.874104 |
| 355 | 1 | 0 | 10.462013 | 5.276926  | 5.599004  |
| 356 | 1 | 0 | 10.368342 | 4.035425  | 4.325112  |
| 357 | 1 | 0 | 10.772726 | 5.713093  | 3.897203  |
| 358 | 6 | 0 | 5.147084  | 0.551811  | 5.475194  |
| 359 | 1 | 0 | 5.780455  | 2.314059  | 6.587187  |
| 360 | 1 | 0 | 4.129051  | 2.442694  | 5.864390  |
| 361 | 1 | 0 | 3.980649  | 5.725688  | -6.336592 |
| 362 | 7 | 0 | 4.588341  | -0.165417 | 6.596365  |
| 363 | 1 | 0 | 4.599683  | 0.340149  | 4.505959  |
| 364 | 1 | 0 | 6.206965  | 0.186815  | 5.343616  |
| 365 | 1 | 0 | 3.686426  | 0.191607  | 6.841159  |
| 366 | 1 | 0 | 4.509869  | -1.139327 | 6.381992  |

P Pl (Ac-VQIVYK-NHMe)<sub>4</sub>

|    |   |   |           |            |           |
|----|---|---|-----------|------------|-----------|
| 1  | 6 | 0 | -8.118571 | -8.958900  | 4.741436  |
| 2  | 6 | 0 | -7.024607 | -9.398273  | 3.778210  |
| 3  | 1 | 0 | -8.719289 | -9.834966  | 5.008408  |
| 4  | 1 | 0 | -7.647477 | -8.591501  | 5.658843  |
| 5  | 1 | 0 | -8.764541 | -8.183197  | 4.320562  |
| 6  | 8 | 0 | -6.168536 | -10.233100 | 4.092768  |
| 7  | 7 | 0 | -7.072522 | -8.811792  | 2.545559  |
| 8  | 1 | 0 | -7.708779 | -8.032361  | 2.367831  |
| 9  | 6 | 0 | -6.029097 | -9.106696  | 1.554898  |
| 10 | 6 | 0 | -4.900507 | -8.063870  | 1.742847  |
| 11 | 6 | 0 | -6.509802 | -9.061640  | 0.111197  |
| 12 | 1 | 0 | -5.656012 | -10.112486 | 1.784367  |
| 13 | 8 | 0 | -5.019697 | -6.908664  | 1.301438  |
| 14 | 7 | 0 | -3.836062 | -8.484338  | 2.462001  |
| 15 | 6 | 0 | -5.384558 | -9.491835  | -0.811362 |
| 16 | 6 | 0 | -7.721791 | -9.944651  | -0.101402 |
| 17 | 1 | 0 | -6.788380 | -7.995495  | -0.139295 |
| 18 | 1 | 0 | -3.840019 | -9.433583  | 2.818749  |
| 19 | 6 | 0 | -2.681625 | -7.640388  | 2.768896  |
| 20 | 1 | 0 | -5.716749 | -9.420536  | -1.875052 |
| 21 | 1 | 0 | -4.491049 | -8.832861  | -0.677220 |
| 22 | 1 | 0 | -5.085403 | -10.547591 | -0.604727 |
| 23 | 1 | 0 | -7.961429 | -10.003637 | -1.191007 |
| 24 | 1 | 0 | -7.527778 | -10.977646 | 0.275337  |
| 25 | 1 | 0 | -8.612591 | -9.532431  | 0.430572  |
| 26 | 6 | 0 | -1.495990 | -8.111890  | 1.897130  |
| 27 | 6 | 0 | -2.333442 | -7.715383  | 4.267455  |
| 28 | 1 | 0 | -2.958563 | -6.619815  | 2.495169  |
| 29 | 8 | 0 | -1.121606 | -9.286170  | 1.911510  |
| 30 | 7 | 0 | -0.916124 | -7.129753  | 1.145763  |
| 31 | 6 | 0 | -1.257260 | -6.691526  | 4.673878  |
| 32 | 1 | 0 | -3.252894 | -7.527956  | 4.836273  |
| 33 | 1 | 0 | -1.987624 | -8.723923  | 4.520054  |
| 34 | 1 | 0 | -1.356089 | -6.208725  | 1.102765  |
| 35 | 6 | 0 | 0.130268  | -7.438505  | 0.162986  |
| 36 | 6 | 0 | -0.946680 | -6.789484  | 6.169241  |
| 37 | 1 | 0 | -0.323058 | -6.904230  | 4.140210  |
| 38 | 1 | 0 | -1.573264 | -5.676315  | 4.407964  |
| 39 | 6 | 0 | 1.248902  | -6.387026  | 0.348889  |
| 40 | 6 | 0 | -0.342806 | -7.404998  | -1.290190 |
| 41 | 1 | 0 | 0.484710  | -8.449977  | 0.395646  |



|    |   |   |           |           |           |
|----|---|---|-----------|-----------|-----------|
| 42 | 8 | 0 | -0.509143 | -7.823419 | 6.676945  |
| 43 | 7 | 0 | -1.182752 | -5.651042 | 6.886519  |
| 44 | 8 | 0 | 0.978137  | -5.178310 | 0.332222  |
| 45 | 7 | 0 | 2.501884  | -6.865670 | 0.548360  |
| 46 | 6 | 0 | -1.388460 | -8.482921 | -1.552623 |
| 47 | 6 | 0 | 0.838979  | -7.587565 | -2.221602 |
| 48 | 1 | 0 | -0.802700 | -6.393189 | -1.490501 |
| 49 | 1 | 0 | -1.041767 | -5.702743 | 7.886337  |
| 50 | 1 | 0 | -1.624979 | -4.828266 | 6.482891  |
| 51 | 1 | 0 | 2.667546  | -7.864540 | 0.526409  |
| 52 | 6 | 0 | 3.660107  | -5.987816 | 0.786318  |
| 53 | 6 | 0 | -2.270577 | -8.137989 | -2.725776 |
| 54 | 1 | 0 | -0.871345 | -9.461204 | -1.740661 |
| 55 | 1 | 0 | -2.035561 | -8.629269 | -0.646908 |
| 56 | 1 | 0 | 0.478534  | -7.737830 | -3.268637 |
| 57 | 1 | 0 | 1.501429  | -6.687148 | -2.205871 |
| 58 | 1 | 0 | 1.443673  | -8.479768 | -1.928270 |
| 59 | 6 | 0 | 4.723637  | -6.273131 | -0.308831 |
| 60 | 6 | 0 | 4.310155  | -6.183443 | 2.153680  |
| 61 | 1 | 0 | 3.292384  | -4.959884 | 0.710552  |
| 62 | 1 | 0 | -3.077309 | -8.903940 | -2.833982 |
| 63 | 1 | 0 | -2.752573 | -7.140318 | -2.578903 |
| 64 | 1 | 0 | -1.682305 | -8.106824 | -3.674394 |
| 65 | 8 | 0 | 5.107766  | -7.421607 | -0.539790 |
| 66 | 7 | 0 | 5.172388  | -5.156437 | -0.950072 |
| 67 | 6 | 0 | 5.418240  | -5.162560 | 2.334074  |
| 68 | 6 | 0 | 3.299706  | -6.048827 | 3.274748  |
| 69 | 1 | 0 | 4.760440  | -7.216570 | 2.196136  |
| 70 | 1 | 0 | 4.784211  | -4.247014 | -0.692939 |
| 71 | 6 | 0 | 6.228801  | -5.201705 | -1.954831 |
| 72 | 1 | 0 | 5.812946  | -5.208469 | 3.377454  |
| 73 | 1 | 0 | 6.260805  | -5.366935 | 1.630634  |
| 74 | 1 | 0 | 5.036033  | -4.129677 | 2.139450  |
| 75 | 1 | 0 | 3.821293  | -6.071884 | 4.262460  |
| 76 | 1 | 0 | 2.744654  | -5.083192 | 3.188743  |
| 77 | 1 | 0 | 2.561375  | -6.885916 | 3.255289  |
| 78 | 6 | 0 | 7.384581  | -4.252375 | -1.538561 |
| 79 | 6 | 0 | 5.799362  | -4.777617 | -3.355875 |
| 80 | 1 | 0 | 6.583089  | -6.240175 | -1.993304 |
| 81 | 8 | 0 | 7.169447  | -3.214285 | -0.899324 |
| 82 | 7 | 0 | 8.617760  | -4.634609 | -1.953741 |
| 83 | 6 | 0 | 5.065083  | -5.848404 | -4.080887 |
| 84 | 1 | 0 | 5.165805  | -3.848605 | -3.301910 |

|     |   |   |            |           |           |
|-----|---|---|------------|-----------|-----------|
| 85  | 1 | 0 | 6.719294   | -4.511191 | -3.947660 |
| 86  | 1 | 0 | 8.686842   | -5.407916 | -2.607152 |
| 87  | 6 | 0 | 9.771835   | -3.723118 | -1.935617 |
| 88  | 6 | 0 | 3.664918   | -5.870038 | -4.093105 |
| 89  | 6 | 0 | 5.773896   | -6.827277 | -4.787363 |
| 90  | 6 | 0 | 10.044299  | -3.249483 | -3.390868 |
| 91  | 6 | 0 | 11.031199  | -4.337796 | -1.360455 |
| 92  | 1 | 0 | 9.493841   | -2.866527 | -1.309683 |
| 93  | 6 | 0 | 2.974810   | -6.844103 | -4.806289 |
| 94  | 1 | 0 | 3.101514   | -5.111210 | -3.526963 |
| 95  | 6 | 0 | 5.102161   | -7.812690 | -5.504675 |
| 96  | 1 | 0 | 6.874798   | -6.817563 | -4.780070 |
| 97  | 8 | 0 | 9.888178   | -4.018269 | -4.345499 |
| 98  | 7 | 0 | 10.475314  | -1.967484 | -3.485214 |
| 99  | 6 | 0 | 11.447304  | -5.631475 | -2.028240 |
| 100 | 1 | 0 | 11.853873  | -3.578714 | -1.461107 |
| 101 | 1 | 0 | 10.879041  | -4.519778 | -0.261431 |
| 102 | 6 | 0 | 3.700193   | -7.816284 | -5.513809 |
| 103 | 1 | 0 | 1.875936   | -6.871279 | -4.815135 |
| 104 | 1 | 0 | 5.663311   | -8.580663 | -6.054798 |
| 105 | 1 | 0 | 10.413938  | -1.373333 | -2.658424 |
| 106 | 6 | 0 | 10.811573  | -1.359190 | -4.763498 |
| 107 | 6 | 0 | 12.847945  | -6.026609 | -1.611186 |
| 108 | 1 | 0 | 10.731552  | -6.450212 | -1.751598 |
| 109 | 1 | 0 | 11.401336  | -5.512190 | -3.144622 |
| 110 | 8 | 0 | 2.963638   | -8.748051 | -6.209268 |
| 111 | 1 | 0 | 11.748027  | -0.795398 | -4.680657 |
| 112 | 1 | 0 | 10.930473  | -2.152949 | -5.503974 |
| 113 | 1 | 0 | 10.020696  | -0.678293 | -5.105939 |
| 114 | 6 | 0 | 13.238146  | -7.349366 | -2.269176 |
| 115 | 1 | 0 | 13.573697  | -5.225363 | -1.909638 |
| 116 | 1 | 0 | 12.896116  | -6.123269 | -0.494859 |
| 117 | 1 | 0 | 3.580584   | -9.384012 | -6.599434 |
| 118 | 7 | 0 | 14.583389  | -7.769051 | -1.955586 |
| 119 | 1 | 0 | 12.465408  | -8.123777 | -1.979582 |
| 120 | 1 | 0 | 13.177758  | -7.228177 | -3.388936 |
| 121 | 1 | 0 | 14.741579  | -7.765187 | -0.967764 |
| 122 | 1 | 0 | 14.751809  | -8.688363 | -2.311984 |
| 123 | 8 | 0 | -8.806584  | -6.526675 | 2.149406  |
| 124 | 6 | 0 | -9.292127  | -5.414729 | 1.886132  |
| 125 | 7 | 0 | -8.733680  | -4.530875 | 1.020558  |
| 126 | 6 | 0 | -10.577629 | -4.946804 | 2.552315  |
| 127 | 6 | 0 | -7.477298  | -4.805548 | 0.309889  |

|     |   |   |            |           |           |
|-----|---|---|------------|-----------|-----------|
| 128 | 1 | 0 | -9.215791  | -3.650934 | 0.827669  |
| 129 | 1 | 0 | -11.347157 | -5.709130 | 2.393506  |
| 130 | 1 | 0 | -10.401095 | -4.878203 | 3.631411  |
| 131 | 1 | 0 | -10.922607 | -3.981372 | 2.173684  |
| 132 | 6 | 0 | -6.475692  | -3.683554 | 0.679912  |
| 133 | 6 | 0 | -7.611222  | -4.849493 | -1.210485 |
| 134 | 1 | 0 | -7.109866  | -5.775334 | 0.662421  |
| 135 | 7 | 0 | -5.312588  | -4.096011 | 1.224750  |
| 136 | 8 | 0 | -6.774466  | -2.490986 | 0.493586  |
| 137 | 6 | 0 | -6.267605  | -5.195303 | -1.823896 |
| 138 | 6 | 0 | -8.654362  | -5.858352 | -1.644354 |
| 139 | 1 | 0 | -7.923354  | -3.827256 | -1.574902 |
| 140 | 1 | 0 | -5.127636  | -5.102410 | 1.307881  |
| 141 | 6 | 0 | -4.275515  | -3.163912 | 1.665699  |
| 142 | 1 | 0 | -6.374920  | -5.339687 | -2.925715 |
| 143 | 1 | 0 | -5.532024  | -4.373048 | -1.646890 |
| 144 | 1 | 0 | -5.861823  | -6.136708 | -1.376590 |
| 145 | 1 | 0 | -8.645969  | -5.961269 | -2.756689 |
| 146 | 1 | 0 | -8.444115  | -6.859175 | -1.193918 |
| 147 | 1 | 0 | -9.676000  | -5.534914 | -1.332099 |
| 148 | 6 | 0 | -2.959398  | -3.548731 | 0.965063  |
| 149 | 6 | 0 | -4.112300  | -3.210213 | 3.197073  |
| 150 | 1 | 0 | -4.585354  | -2.165107 | 1.351979  |
| 151 | 8 | 0 | -2.416907  | -4.636486 | 1.201843  |
| 152 | 7 | 0 | -2.476152  | -2.628485 | 0.098704  |
| 153 | 6 | 0 | -3.095438  | -2.174194 | 3.714609  |
| 154 | 1 | 0 | -5.095484  | -3.022672 | 3.645807  |
| 155 | 1 | 0 | -3.795114  | -4.213618 | 3.498743  |
| 156 | 1 | 0 | -2.974367  | -1.743865 | -0.018453 |
| 157 | 6 | 0 | -1.243714  | -2.851627 | -0.672254 |
| 158 | 6 | 0 | -2.929806  | -2.281687 | 5.227112  |
| 159 | 1 | 0 | -2.109752  | -2.371577 | 3.275186  |
| 160 | 1 | 0 | -3.400793  | -1.161100 | 3.430725  |
| 161 | 6 | 0 | -0.205909  | -1.810870 | -0.177664 |
| 162 | 6 | 0 | -1.411026  | -2.708068 | -2.182824 |
| 163 | 1 | 0 | -0.901510  | -3.866627 | -0.443126 |
| 164 | 8 | 0 | -2.446487  | -3.291257 | 5.755102  |
| 165 | 7 | 0 | -3.347811  | -1.208986 | 5.945896  |
| 166 | 8 | 0 | -0.446630  | -0.594256 | -0.256628 |
| 167 | 7 | 0 | 0.917722   | -2.331526 | 0.360958  |
| 168 | 6 | 0 | -2.475710  | -3.657440 | -2.716553 |
| 169 | 6 | 0 | -0.076715  | -2.977193 | -2.851945 |
| 170 | 1 | 0 | -1.724188  | -1.647886 | -2.411038 |

|     |   |   |           |           |           |
|-----|---|---|-----------|-----------|-----------|
| 171 | 1 | 0 | -3.286837 | -1.270155 | 6.953498  |
| 172 | 1 | 0 | -3.771808 | -0.390152 | 5.511699  |
| 173 | 1 | 0 | 1.029784  | -3.349166 | 0.390640  |
| 174 | 6 | 0 | 1.981374  | -1.493563 | 0.935232  |
| 175 | 6 | 0 | -2.801296 | -3.394655 | -4.165361 |
| 176 | 1 | 0 | -2.123018 | -4.716492 | -2.591897 |
| 177 | 1 | 0 | -3.418858 | -3.549999 | -2.117421 |
| 178 | 1 | 0 | -0.163393 | -2.858041 | -3.960357 |
| 179 | 1 | 0 | 0.696629  | -2.252949 | -2.494209 |
| 180 | 1 | 0 | 0.273724  | -4.014347 | -2.628603 |
| 181 | 6 | 0 | 3.268611  | -1.685038 | 0.092797  |
| 182 | 6 | 0 | 2.303295  | -1.839509 | 2.386887  |
| 183 | 1 | 0 | 1.642073  | -0.453703 | 0.876998  |
| 184 | 1 | 0 | -3.676308 | -4.015009 | -4.477879 |
| 185 | 1 | 0 | -3.056972 | -2.318414 | -4.323874 |
| 186 | 1 | 0 | -1.938871 | -3.651218 | -4.826654 |
| 187 | 8 | 0 | 3.765736  | -2.810007 | -0.056140 |
| 188 | 7 | 0 | 3.781144  | -0.550010 | -0.435765 |
| 189 | 6 | 0 | 3.503741  | -1.041345 | 2.857347  |
| 190 | 6 | 0 | 1.114593  | -1.569219 | 3.285731  |
| 191 | 1 | 0 | 2.563403  | -2.937313 | 2.447258  |
| 192 | 1 | 0 | 3.297309  | 0.338185  | -0.285455 |
| 193 | 6 | 0 | 5.037166  | -0.536872 | -1.193443 |
| 194 | 1 | 0 | 3.656904  | -1.192972 | 3.953398  |
| 195 | 1 | 0 | 4.428153  | -1.375366 | 2.325049  |
| 196 | 1 | 0 | 3.355894  | 0.049306  | 2.666872  |
| 197 | 1 | 0 | 1.383320  | -1.784553 | 4.348435  |
| 198 | 1 | 0 | 0.799595  | -0.500039 | 3.208701  |
| 199 | 1 | 0 | 0.247932  | -2.216588 | 3.008654  |
| 200 | 6 | 0 | 6.095355  | 0.238297  | -0.368984 |
| 201 | 6 | 0 | 4.945072  | 0.161205  | -2.540766 |
| 202 | 1 | 0 | 5.344723  | -1.578295 | -1.334520 |
| 203 | 8 | 0 | 5.871640  | 1.405190  | -0.006701 |
| 204 | 7 | 0 | 7.235758  | -0.433141 | -0.102981 |
| 205 | 6 | 0 | 4.006636  | -0.499655 | -3.484664 |
| 206 | 1 | 0 | 4.632402  | 1.232469  | -2.387006 |
| 207 | 1 | 0 | 5.978960  | 0.176335  | -2.983395 |
| 208 | 1 | 0 | 7.320110  | -1.412448 | -0.386967 |
| 209 | 6 | 0 | 8.338688  | 0.202597  | 0.629268  |
| 210 | 6 | 0 | 2.645748  | -0.163398 | -3.471848 |
| 211 | 6 | 0 | 4.474687  | -1.436756 | -4.411317 |
| 212 | 6 | 0 | 9.518720  | 0.499947  | -0.331873 |
| 213 | 6 | 0 | 8.830301  | -0.587234 | 1.824236  |

|     |   |   |           |           |           |
|-----|---|---|-----------|-----------|-----------|
| 214 | 1 | 0 | 7.944429  | 1.156137  | 1.003033  |
| 215 | 6 | 0 | 1.761256  | -0.745522 | -4.371994 |
| 216 | 1 | 0 | 2.271362  | 0.566962  | -2.735117 |
| 217 | 6 | 0 | 3.604406  | -2.032124 | -5.321415 |
| 218 | 1 | 0 | 5.541497  | -1.709133 | -4.425955 |
| 219 | 8 | 0 | 9.951225  | -0.347355 | -1.128807 |
| 220 | 7 | 0 | 10.034829 | 1.741630  | -0.212680 |
| 221 | 6 | 0 | 9.378047  | -1.960792 | 1.503259  |
| 222 | 1 | 0 | 9.628749  | 0.024226  | 2.326603  |
| 223 | 1 | 0 | 7.983395  | -0.693376 | 2.557101  |
| 224 | 6 | 0 | 2.247166  | -1.684517 | -5.297492 |
| 225 | 1 | 0 | 0.691617  | -0.489411 | -4.365091 |
| 226 | 1 | 0 | 3.976914  | -2.770266 | -6.045506 |
| 227 | 1 | 0 | 9.547815  | 2.426088  | 0.367182  |
| 228 | 6 | 0 | 11.161095 | 2.182183  | -1.023123 |
| 229 | 6 | 0 | 9.900605  | -2.622837 | 2.761485  |
| 230 | 1 | 0 | 8.577954  | -2.601356 | 1.042283  |
| 231 | 1 | 0 | 10.202147 | -1.870773 | 0.745099  |
| 232 | 8 | 0 | 1.323057  | -2.231362 | -6.159028 |
| 233 | 1 | 0 | 11.616688 | 3.058387  | -0.552990 |
| 234 | 1 | 0 | 11.904152 | 1.382740  | -1.093918 |
| 235 | 1 | 0 | 10.849602 | 2.449065  | -2.041881 |
| 236 | 6 | 0 | 10.519581 | -3.979801 | 2.432175  |
| 237 | 1 | 0 | 10.669045 | -1.965913 | 3.247255  |
| 238 | 1 | 0 | 9.060049  | -2.750632 | 3.493332  |
| 239 | 1 | 0 | 1.778669  | -2.885903 | -6.708338 |
| 240 | 7 | 0 | 11.024510 | -4.676859 | 3.591602  |
| 241 | 1 | 0 | 9.751766  | -4.585517 | 1.862859  |
| 242 | 1 | 0 | 11.393606 | -3.817959 | 1.736864  |
| 243 | 1 | 0 | 10.343032 | -4.701069 | 4.323750  |
| 244 | 1 | 0 | 11.278567 | -5.613572 | 3.349222  |
| 245 | 8 | 0 | 2.280431  | 1.799594  | 0.030502  |
| 246 | 6 | 0 | 1.768547  | 2.920900  | 0.147267  |
| 247 | 6 | 0 | 0.329797  | 3.080580  | 0.700067  |
| 248 | 7 | 0 | 2.393640  | 4.080143  | -0.160409 |
| 249 | 7 | 0 | -0.583836 | 2.241252  | -0.088687 |
| 250 | 6 | 0 | 0.351915  | 2.730491  | 2.187172  |
| 251 | 1 | 0 | -0.006806 | 4.115605  | 0.581673  |
| 252 | 1 | 0 | 1.875899  | 4.958402  | -0.091703 |
| 253 | 6 | 0 | 3.795425  | 4.139278  | -0.601842 |
| 254 | 6 | 0 | -1.641893 | 2.765589  | -0.745760 |
| 255 | 1 | 0 | -0.446283 | 1.224853  | -0.087803 |
| 256 | 6 | 0 | 1.282560  | 3.671861  | 2.927262  |

|     |   |   |           |           |           |
|-----|---|---|-----------|-----------|-----------|
| 257 | 6 | 0 | -1.036244 | 2.805031  | 2.789809  |
| 258 | 1 | 0 | 0.739638  | 1.676160  | 2.301911  |
| 259 | 6 | 0 | 4.617581  | 4.787710  | 0.542555  |
| 260 | 6 | 0 | 4.010175  | 4.992235  | -1.840272 |
| 261 | 1 | 0 | 4.129148  | 3.112159  | -0.786827 |
| 262 | 6 | 0 | -2.579212 | 1.735671  | -1.428390 |
| 263 | 8 | 0 | -1.901150 | 3.980770  | -0.796983 |
| 264 | 1 | 0 | 1.209069  | 3.491277  | 4.027325  |
| 265 | 1 | 0 | 2.343148  | 3.509994  | 2.616887  |
| 266 | 1 | 0 | 1.010270  | 4.736515  | 2.724346  |
| 267 | 1 | 0 | -0.980454 | 2.663762  | 3.896625  |
| 268 | 1 | 0 | -1.501886 | 3.799261  | 2.581731  |
| 269 | 1 | 0 | -1.695656 | 2.006416  | 2.372389  |
| 270 | 8 | 0 | 4.326083  | 5.930494  | 0.938542  |
| 271 | 7 | 0 | 5.618871  | 4.040073  | 1.055400  |
| 272 | 6 | 0 | 3.210401  | 4.548876  | -3.011966 |
| 273 | 1 | 0 | 3.757177  | 6.064592  | -1.601649 |
| 274 | 1 | 0 | 5.106154  | 4.954681  | -2.088412 |
| 275 | 7 | 0 | -3.910648 | 1.894498  | -0.814132 |
| 276 | 6 | 0 | -2.556378 | 1.972813  | -2.935618 |
| 277 | 1 | 0 | -2.243010 | 0.714817  | -1.217141 |
| 278 | 1 | 0 | 5.772963  | 3.087052  | 0.711100  |
| 279 | 6 | 0 | 6.388316  | 4.523130  | 2.207697  |
| 280 | 6 | 0 | 1.886224  | 4.985195  | -3.163101 |
| 281 | 6 | 0 | 3.777128  | 3.720552  | -3.985575 |
| 282 | 6 | 0 | -4.528955 | 0.894400  | -0.144640 |
| 283 | 1 | 0 | -4.394621 | 2.786491  | -0.928962 |
| 284 | 6 | 0 | -3.416269 | 0.951479  | -3.668955 |
| 285 | 6 | 0 | -1.122424 | 1.911785  | -3.427118 |
| 286 | 1 | 0 | -2.962144 | 3.005593  | -3.143054 |
| 287 | 6 | 0 | 7.901229  | 4.561803  | 1.890881  |
| 288 | 6 | 0 | 6.147159  | 3.757970  | 3.493273  |
| 289 | 1 | 0 | 6.047274  | 5.548995  | 2.383281  |
| 290 | 6 | 0 | 1.133892  | 4.602803  | -4.267305 |
| 291 | 1 | 0 | 1.433012  | 5.635399  | -2.394530 |
| 292 | 6 | 0 | 3.041565  | 3.330533  | -5.102046 |
| 293 | 1 | 0 | 4.813893  | 3.368483  | -3.870568 |
| 294 | 6 | 0 | -5.916251 | 1.237673  | 0.434889  |
| 295 | 8 | 0 | -4.042871 | -0.231091 | 0.030814  |
| 296 | 6 | 0 | -3.718893 | 1.377904  | -5.083463 |
| 297 | 1 | 0 | -2.888093 | -0.039835 | -3.675239 |
| 298 | 1 | 0 | -4.387131 | 0.802883  | -3.125795 |
| 299 | 1 | 0 | -1.091807 | 1.970216  | -4.542227 |

|     |   |   |           |           |           |
|-----|---|---|-----------|-----------|-----------|
| 300 | 1 | 0 | -0.531806 | 2.771003  | -3.021974 |
| 301 | 1 | 0 | -0.634410 | 0.958398  | -3.107197 |
| 302 | 8 | 0 | 8.494291  | 3.627840  | 1.332276  |
| 303 | 7 | 0 | 8.515008  | 5.695179  | 2.300151  |
| 304 | 6 | 0 | 6.471086  | 2.281543  | 3.437888  |
| 305 | 1 | 0 | 6.762199  | 4.244591  | 4.298945  |
| 306 | 1 | 0 | 5.066255  | 3.885771  | 3.782545  |
| 307 | 6 | 0 | 1.718395  | 3.771867  | -5.238034 |
| 308 | 1 | 0 | 0.093589  | 4.939100  | -4.390396 |
| 309 | 1 | 0 | 3.489988  | 2.676361  | -5.862669 |
| 310 | 6 | 0 | -5.891542 | 1.182169  | 1.976597  |
| 311 | 7 | 0 | -6.892769 | 0.282144  | -0.081886 |
| 312 | 1 | 0 | -6.223433 | 2.229907  | 0.099478  |
| 313 | 1 | 0 | -4.419736 | 0.650227  | -5.560028 |
| 314 | 1 | 0 | -4.195005 | 2.388805  | -5.097936 |
| 315 | 1 | 0 | -2.788712 | 1.421101  | -5.699864 |
| 316 | 1 | 0 | 7.941321  | 6.448782  | 2.675554  |
| 317 | 6 | 0 | 9.945557  | 5.904897  | 2.128993  |
| 318 | 6 | 0 | 6.210045  | 1.646728  | 4.788703  |
| 319 | 1 | 0 | 5.849928  | 1.775373  | 2.650689  |
| 320 | 1 | 0 | 7.545931  | 2.140725  | 3.143723  |
| 321 | 8 | 0 | 0.926522  | 3.427877  | -6.309974 |
| 322 | 6 | 0 | -4.976602 | 2.246660  | 2.612084  |
| 323 | 1 | 0 | -6.920380 | 1.323300  | 2.329854  |
| 324 | 1 | 0 | -5.569424 | 0.186310  | 2.297401  |
| 325 | 6 | 0 | -7.968043 | 0.660717  | -0.803219 |
| 326 | 1 | 0 | -6.766960 | -0.710433 | 0.149034  |
| 327 | 1 | 0 | 10.281494 | 6.674147  | 2.830401  |
| 328 | 1 | 0 | 10.484149 | 4.974768  | 2.331595  |
| 329 | 1 | 0 | 10.189914 | 6.227562  | 1.108300  |
| 330 | 6 | 0 | 6.531123  | 0.154295  | 4.752461  |
| 331 | 1 | 0 | 6.835405  | 2.150130  | 5.572237  |
| 332 | 1 | 0 | 5.134968  | 1.802615  | 5.073395  |
| 333 | 1 | 0 | 1.427212  | 2.811962  | -6.864640 |
| 334 | 6 | 0 | -4.964472 | 2.105582  | 4.130657  |
| 335 | 1 | 0 | -3.942595 | 2.104729  | 2.273575  |
| 336 | 1 | 0 | -5.293252 | 3.253231  | 2.316978  |
| 337 | 6 | 0 | -8.922980 | -0.484653 | -1.223183 |
| 338 | 8 | 0 | -8.218348 | 1.839400  | -1.117128 |
| 339 | 7 | 0 | 6.306298  | -0.508046 | 6.015277  |
| 340 | 1 | 0 | 5.935962  | -0.310516 | 3.907200  |
| 341 | 1 | 0 | 7.623675  | 0.028106  | 4.500108  |
| 342 | 7 | 0 | -5.492280 | 3.139988  | 4.831680  |

|     |   |   |            |           |           |
|-----|---|---|------------|-----------|-----------|
| 343 | 8 | 0 | -4.503689  | 1.096532  | 4.680705  |
| 344 | 7 | 0 | -10.247852 | -0.212377 | -0.644164 |
| 345 | 6 | 0 | -8.915134  | -0.580905 | -2.746503 |
| 346 | 1 | 0 | -8.581162  | -1.435534 | -0.799144 |
| 347 | 1 | 0 | 5.374351   | -0.352453 | 6.343726  |
| 348 | 1 | 0 | 6.463233   | -1.491794 | 5.924750  |
| 349 | 1 | 0 | -5.887985  | 3.964446  | 4.384901  |
| 350 | 1 | 0 | -5.525110  | 3.054532  | 5.838973  |
| 351 | 6 | 0 | -10.867886 | -1.083311 | 0.196635  |
| 352 | 1 | 0 | -10.754207 | 0.620557  | -0.945704 |
| 353 | 6 | 0 | -7.512882  | -0.895518 | -3.231975 |
| 354 | 6 | 0 | -9.878652  | -1.642051 | -3.236526 |
| 355 | 1 | 0 | -9.225793  | 0.418491  | -3.170735 |
| 356 | 6 | 0 | -12.235884 | -0.644730 | 0.697765  |
| 357 | 8 | 0 | -10.371107 | -2.159106 | 0.562091  |
| 358 | 1 | 0 | -7.512158  | -1.013487 | -4.342362 |
| 359 | 1 | 0 | -6.807999  | -0.070518 | -2.965636 |
| 360 | 1 | 0 | -7.141749  | -1.844699 | -2.773489 |
| 361 | 1 | 0 | -9.771166  | -1.773417 | -4.340668 |
| 362 | 1 | 0 | -9.667731  | -2.621060 | -2.740785 |
| 363 | 1 | 0 | -10.935007 | -1.353360 | -3.021127 |
| 364 | 1 | 0 | -12.946551 | -1.456479 | 0.512830  |
| 365 | 1 | 0 | -12.175529 | -0.501989 | 1.782434  |
| 366 | 1 | 0 | -12.586580 | 0.274796  | 0.223679  |
| 367 | 1 | 0 | -7.755424  | 8.484520  | 3.288213  |
| 368 | 7 | 0 | -7.457596  | 7.640152  | 3.753396  |
| 369 | 6 | 0 | -6.940502  | 6.581353  | 3.066292  |
| 370 | 1 | 0 | -7.568922  | 7.562783  | 4.755850  |
| 371 | 6 | 0 | -6.814956  | 6.751911  | 1.556807  |
| 372 | 8 | 0 | -6.593482  | 5.544859  | 3.637396  |
| 373 | 6 | 0 | -7.631865  | 5.675160  | 0.817208  |
| 374 | 1 | 0 | -5.746645  | 6.653197  | 1.323809  |
| 375 | 1 | 0 | -7.125594  | 7.756432  | 1.244006  |
| 376 | 6 | 0 | -7.463395  | 5.710110  | -0.718956 |
| 377 | 1 | 0 | -8.698619  | 5.805870  | 1.033733  |
| 378 | 1 | 0 | -7.339782  | 4.686021  | 1.183749  |
| 379 | 7 | 0 | -8.320300  | 4.717433  | -1.352004 |
| 380 | 6 | 0 | -6.007665  | 5.403291  | -1.102468 |
| 381 | 1 | 0 | -7.774474  | 6.688273  | -1.099887 |
| 382 | 6 | 0 | -9.494573  | 5.064308  | -1.938128 |
| 383 | 1 | 0 | -8.079350  | 3.724915  | -1.260969 |
| 384 | 8 | 0 | -5.548299  | 4.268816  | -0.919235 |
| 385 | 7 | 0 | -5.293518  | 6.430649  | -1.616109 |



|     |   |   |            |          |           |
|-----|---|---|------------|----------|-----------|
| 386 | 6 | 0 | -10.287379 | 3.884938 | -2.554168 |
| 387 | 8 | 0 | -9.933113  | 6.219712 | -1.987075 |
| 388 | 1 | 0 | -5.707022  | 7.354337 | -1.660571 |
| 389 | 6 | 0 | -3.851786  | 6.341792 | -1.912157 |
| 390 | 7 | 0 | -11.698908 | 4.112808 | -2.216913 |
| 391 | 6 | 0 | -9.999972  | 3.814394 | -4.052272 |
| 392 | 1 | 0 | -9.986168  | 2.937575 | -2.094841 |
| 393 | 6 | 0 | -3.144764  | 7.322908 | -0.935278 |
| 394 | 6 | 0 | -3.495844  | 6.701883 | -3.351289 |
| 395 | 1 | 0 | -3.541200  | 5.310504 | -1.713991 |
| 396 | 1 | 0 | -12.029841 | 5.064111 | -2.325368 |
| 397 | 6 | 0 | -12.473618 | 3.192818 | -1.586211 |
| 398 | 6 | 0 | -8.532785  | 3.497111 | -4.275344 |
| 399 | 6 | 0 | -10.861395 | 2.764070 | -4.724683 |
| 400 | 1 | 0 | -10.228693 | 4.816252 | -4.515546 |
| 401 | 8 | 0 | -3.617618  | 8.445520 | -0.724543 |
| 402 | 7 | 0 | -2.016813  | 6.836424 | -0.351118 |
| 403 | 6 | 0 | -4.138202  | 5.730952 | -4.336037 |
| 404 | 6 | 0 | -1.986404  | 6.689768 | -3.509533 |
| 405 | 1 | 0 | -3.873094  | 7.741255 | -3.571821 |
| 406 | 6 | 0 | -13.875187 | 3.655707 | -1.214410 |
| 407 | 8 | 0 | -12.089636 | 2.045610 | -1.319037 |
| 408 | 1 | 0 | -8.360000  | 3.216549 | -5.342411 |
| 409 | 1 | 0 | -7.896074  | 4.384256 | -4.043291 |
| 410 | 1 | 0 | -8.210252  | 2.645601 | -3.624746 |
| 411 | 1 | 0 | -10.555958 | 2.646610 | -5.792803 |
| 412 | 1 | 0 | -10.748044 | 1.778204 | -4.211292 |
| 413 | 1 | 0 | -11.938622 | 3.054639 | -4.702103 |
| 414 | 1 | 0 | -1.779853  | 5.848252 | -0.475275 |
| 415 | 6 | 0 | -1.280847  | 7.618808 | 0.646203  |
| 416 | 6 | 0 | -4.199796  | 6.299172 | -5.731511 |
| 417 | 1 | 0 | -3.553570  | 4.771954 | -4.342705 |
| 418 | 1 | 0 | -5.180457  | 5.475307 | -4.009345 |
| 419 | 1 | 0 | -1.710956  | 6.727420 | -4.591195 |
| 420 | 1 | 0 | -1.531936  | 7.575398 | -3.003545 |
| 421 | 1 | 0 | -1.551100  | 5.760220 | -3.064389 |
| 422 | 1 | 0 | -14.600014 | 2.975666 | -1.672573 |
| 423 | 1 | 0 | -13.991460 | 3.580150 | -0.128437 |
| 424 | 1 | 0 | -14.093488 | 4.680598 | -1.529537 |
| 425 | 6 | 0 | 0.233584   | 7.487711 | 0.349783  |
| 426 | 6 | 0 | -1.519592  | 7.193228 | 2.098218  |
| 427 | 1 | 0 | -1.616384  | 8.656809 | 0.530496  |
| 428 | 1 | 0 | -4.681737  | 5.564473 | -6.421390 |

|     |   |   |           |           |           |
|-----|---|---|-----------|-----------|-----------|
| 429 | 1 | 0 | -4.797503 | 7.242655  | -5.748497 |
| 430 | 1 | 0 | -3.177945 | 6.525565  | -6.120852 |
| 431 | 8 | 0 | 0.719765  | 6.403797  | 0.005642  |
| 432 | 7 | 0 | 0.959376  | 8.622214  | 0.510786  |
| 433 | 6 | 0 | -0.988382 | 8.245277  | 3.053024  |
| 434 | 6 | 0 | -2.994169 | 6.961059  | 2.366088  |
| 435 | 1 | 0 | -0.969678 | 6.224712  | 2.282948  |
| 436 | 1 | 0 | 0.505746  | 9.426371  | 0.932659  |
| 437 | 6 | 0 | 2.429236  | 8.630064  | 0.574054  |
| 438 | 1 | 0 | -1.275923 | 7.984137  | 4.100887  |
| 439 | 1 | 0 | 0.125916  | 8.314160  | 3.013954  |
| 440 | 1 | 0 | -1.415593 | 9.249173  | 2.813871  |
| 441 | 1 | 0 | -3.179503 | 6.889673  | 3.465231  |
| 442 | 1 | 0 | -3.603608 | 7.801939  | 1.952781  |
| 443 | 1 | 0 | -3.336905 | 6.007668  | 1.895563  |
| 444 | 6 | 0 | 2.826615  | 8.973708  | 2.035875  |
| 445 | 6 | 0 | 3.078592  | 9.684420  | -0.307920 |
| 446 | 1 | 0 | 2.787444  | 7.635881  | 0.286335  |
| 447 | 8 | 0 | 2.185582  | 9.820335  | 2.667264  |
| 448 | 7 | 0 | 3.931286  | 8.339280  | 2.516076  |
| 449 | 6 | 0 | 2.756317  | 9.533307  | -1.750939 |
| 450 | 1 | 0 | 2.768703  | 10.708325 | 0.040366  |
| 451 | 1 | 0 | 4.190901  | 9.602789  | -0.159648 |
| 452 | 1 | 0 | 4.271554  | 7.496450  | 2.043844  |
| 453 | 6 | 0 | 4.399874  | 8.652389  | 3.867665  |
| 454 | 6 | 0 | 1.659190  | 10.208093 | -2.303412 |
| 455 | 6 | 0 | 3.562890  | 8.743420  | -2.576817 |
| 456 | 6 | 0 | 5.936250  | 8.513936  | 3.948494  |
| 457 | 6 | 0 | 3.756680  | 7.857377  | 4.990082  |
| 458 | 1 | 0 | 4.124539  | 9.702243  | 4.039195  |
| 459 | 6 | 0 | 1.362927  | 10.100418 | -3.656943 |
| 460 | 1 | 0 | 1.021351  | 10.830417 | -1.656952 |
| 461 | 6 | 0 | 3.285441  | 8.623694  | -3.935967 |
| 462 | 1 | 0 | 4.427198  | 8.210989  | -2.150208 |
| 463 | 8 | 0 | 6.569929  | 7.657428  | 3.321731  |
| 464 | 7 | 0 | 6.534307  | 9.389946  | 4.795977  |
| 465 | 6 | 0 | 3.955383  | 6.360251  | 4.897862  |
| 466 | 1 | 0 | 4.177776  | 8.229866  | 5.962938  |
| 467 | 1 | 0 | 2.655185  | 8.083689  | 4.997646  |
| 468 | 6 | 0 | 2.182590  | 9.302361  | -4.472746 |
| 469 | 1 | 0 | 0.504155  | 10.625369 | -4.097782 |
| 470 | 1 | 0 | 3.920243  | 7.999643  | -4.580349 |
| 471 | 1 | 0 | 5.965461  | 10.103753 | 5.230391  |

|     |   |   |          |          |           |
|-----|---|---|----------|----------|-----------|
| 472 | 6 | 0 | 7.967353 | 9.370475 | 5.068138  |
| 473 | 6 | 0 | 3.429037 | 5.685511 | 6.147738  |
| 474 | 1 | 0 | 3.423708 | 5.956569 | 3.995007  |
| 475 | 1 | 0 | 5.046627 | 6.127209 | 4.763823  |
| 476 | 8 | 0 | 1.845383 | 9.236799 | -5.804870 |
| 477 | 1 | 0 | 8.162229 | 9.917051 | 5.994694  |
| 478 | 1 | 0 | 8.306763 | 8.337487 | 5.185781  |
| 479 | 1 | 0 | 8.537899 | 9.833906 | 4.253889  |
| 480 | 6 | 0 | 3.643131 | 4.174838 | 6.073746  |
| 481 | 1 | 0 | 3.952908 | 6.096511 | 7.050467  |
| 482 | 1 | 0 | 2.336690 | 5.912957 | 6.263494  |
| 483 | 1 | 0 | 2.453639 | 8.619224 | -6.236495 |
| 484 | 7 | 0 | 3.185644 | 3.479615 | 7.252279  |
| 485 | 1 | 0 | 3.148626 | 3.798125 | 5.125790  |
| 486 | 1 | 0 | 4.748930 | 3.968411 | 5.970639  |
| 487 | 1 | 0 | 2.220879 | 3.669858 | 7.434326  |
| 488 | 1 | 0 | 3.316186 | 2.493523 | 7.147728  |

P Pl (Ac-VQIVYK-NHMe)<sub>5</sub>

|    |   |   |           |           |           |
|----|---|---|-----------|-----------|-----------|
| 1  | 6 | 0 | -5.856458 | 12.292806 | 5.270283  |
| 2  | 6 | 0 | -6.836359 | 11.605383 | 4.327909  |
| 3  | 1 | 0 | -6.166870 | 13.336029 | 5.391002  |
| 4  | 1 | 0 | -5.928243 | 11.813674 | 6.252449  |
| 5  | 1 | 0 | -4.823905 | 12.250848 | 4.912943  |
| 6  | 8 | 0 | -8.047814 | 11.561696 | 4.562532  |
| 7  | 7 | 0 | -6.265115 | 11.048714 | 3.216470  |
| 8  | 1 | 0 | -5.252687 | 11.084069 | 3.088538  |
| 9  | 6 | 0 | -7.077114 | 10.318500 | 2.239690  |
| 10 | 6 | 0 | -6.759295 | 8.811354  | 2.389907  |
| 11 | 6 | 0 | -6.828967 | 10.718640 | 0.788593  |
| 12 | 1 | 0 | -8.122229 | 10.525497 | 2.501298  |
| 13 | 8 | 0 | -5.612601 | 8.389143  | 2.179183  |
| 14 | 7 | 0 | -7.781381 | 8.020358  | 2.791649  |
| 15 | 6 | 0 | -7.799998 | 9.986588  | -0.117793 |
| 16 | 6 | 0 | -6.967834 | 12.214262 | 0.593215  |
| 17 | 1 | 0 | -5.777322 | 10.413581 | 0.510088  |
| 18 | 1 | 0 | -8.705607 | 8.421392  | 2.900882  |
| 19 | 6 | 0 | -7.661730 | 6.572208  | 2.959486  |
| 20 | 1 | 0 | -7.604185 | 10.258098 | -1.183252 |
| 21 | 1 | 0 | -7.685630 | 8.880036  | -0.011747 |
| 22 | 1 | 0 | -8.853982 | 10.261868 | 0.128166  |
| 23 | 1 | 0 | -6.926696 | 12.460796 | -0.495634 |
| 24 | 1 | 0 | -7.941892 | 12.575981 | 1.002149  |
| 25 | 1 | 0 | -6.140628 | 12.760451 | 1.106693  |
| 26 | 6 | 0 | -8.604488 | 5.899558  | 1.941167  |
| 27 | 6 | 0 | -8.011682 | 6.153419  | 4.402852  |
| 28 | 1 | 0 | -6.623691 | 6.316986  | 2.737316  |
| 29 | 8 | 0 | -9.783730 | 6.248297  | 1.840705  |
| 30 | 7 | 0 | -8.030575 | 4.902150  | 1.208580  |
| 31 | 6 | 0 | -7.670834 | 4.680469  | 4.696005  |
| 32 | 1 | 0 | -7.444263 | 6.801688  | 5.082356  |
| 33 | 1 | 0 | -9.076558 | 6.324699  | 4.595575  |
| 34 | 1 | 0 | -7.016463 | 4.780591  | 1.249663  |
| 35 | 6 | 0 | -8.760320 | 4.215540  | 0.133559  |
| 36 | 6 | 0 | -8.045568 | 4.309520  | 6.132883  |
| 37 | 1 | 0 | -8.252467 | 4.024510  | 4.036480  |
| 38 | 1 | 0 | -6.608678 | 4.487217  | 4.508092  |
| 39 | 6 | 0 | -8.458944 | 2.706453  | 0.289084  |
| 40 | 6 | 0 | -8.362306 | 4.659746  | -1.273967 |
| 41 | 1 | 0 | -9.823820 | 4.434941  | 0.286622  |

|    |   |   |            |           |           |
|----|---|---|------------|-----------|-----------|
| 42 | 8 | 0 | -9.200507  | 4.412951  | 6.550844  |
| 43 | 7 | 0 | -7.014273  | 3.851435  | 6.901479  |
| 44 | 8 | 0 | -7.286166  | 2.311181  | 0.339467  |
| 45 | 7 | 0 | -9.527769  | 1.878481  | 0.385676  |
| 46 | 6 | 0 | -8.790073  | 6.100330  | -1.529133 |
| 47 | 6 | 0 | -8.978688  | 3.738372  | -2.307047 |
| 48 | 1 | 0 | -7.238463  | 4.589608  | -1.365557 |
| 49 | 1 | 0 | -7.220527  | 3.647003  | 7.869918  |
| 50 | 1 | 0 | -6.048007  | 3.846046  | 6.581172  |
| 51 | 1 | 0 | -10.465615 | 2.256515  | 0.325478  |
| 52 | 6 | 0 | -9.395163  | 0.424797  | 0.591649  |
| 53 | 6 | 0 | -7.976990  | 6.744841  | -2.622914 |
| 54 | 1 | 0 | -9.878275  | 6.119342  | -1.803387 |
| 55 | 1 | 0 | -8.682834  | 6.708522  | -0.591030 |
| 56 | 1 | 0 | -8.803396  | 4.147045  | -3.332212 |
| 57 | 1 | 0 | -8.518319  | 2.720991  | -2.252587 |
| 58 | 1 | 0 | -10.080333 | 3.641260  | -2.150758 |
| 59 | 6 | 0 | -10.164468 | -0.295218 | -0.548559 |
| 60 | 6 | 0 | -9.947754  | -0.056469 | 1.930562  |
| 61 | 1 | 0 | -8.326036  | 0.196407  | 0.543466  |
| 62 | 1 | 0 | -8.271518  | 7.816646  | -2.736169 |
| 63 | 1 | 0 | -6.886300  | 6.703326  | -2.382496 |
| 64 | 1 | 0 | -8.139458  | 6.229793  | -3.600352 |
| 65 | 8 | 0 | -11.339400 | -0.015469 | -0.796237 |
| 66 | 7 | 0 | -9.429799  | -1.234081 | -1.211399 |
| 67 | 6 | 0 | -9.740987  | -1.554480 | 2.053358  |
| 68 | 6 | 0 | -9.278995  | 0.651753  | 3.091173  |
| 69 | 1 | 0 | -11.054497 | 0.157848  | 1.964701  |
| 70 | 1 | 0 | -8.454394  | -1.382806 | -0.944808 |
| 71 | 6 | 0 | -9.993840  | -2.057793 | -2.276037 |
| 72 | 1 | 0 | -10.019130 | -1.894681 | 3.079763  |
| 73 | 1 | 0 | -10.378271 | -2.101098 | 1.317258  |
| 74 | 1 | 0 | -8.671547  | -1.819807 | 1.864711  |
| 75 | 1 | 0 | -9.631760  | 0.215619  | 4.057320  |
| 76 | 1 | 0 | -8.169230  | 0.536406  | 3.033507  |
| 77 | 1 | 0 | -9.522669  | 1.741244  | 3.094919  |
| 78 | 6 | 0 | -9.756840  | -3.558262 | -1.958358 |
| 79 | 6 | 0 | -9.409523  | -1.802814 | -3.663495 |
| 80 | 1 | 0 | -11.070072 | -1.842015 | -2.302231 |
| 81 | 8 | 0 | -8.754688  | -3.940461 | -1.339921 |
| 82 | 7 | 0 | -10.708594 | -4.397395 | -2.437252 |
| 83 | 6 | 0 | -10.071109 | -0.665750 | -4.357546 |
| 84 | 1 | 0 | -8.302010  | -1.613944 | -3.591947 |

|     |   |   |            |           |           |
|-----|---|---|------------|-----------|-----------|
| 85  | 1 | 0 | -9.539376  | -2.729634 | -4.288759 |
| 86  | 1 | 0 | -11.411487 | -4.020468 | -3.064883 |
| 87  | 6 | 0 | -10.511434 | -5.851979 | -2.520569 |
| 88  | 6 | 0 | -9.565063  | 0.634171  | -4.235868 |
| 89  | 6 | 0 | -11.196344 | -0.892994 | -5.158636 |
| 90  | 6 | 0 | -10.287336 | -6.227245 | -4.012185 |
| 91  | 6 | 0 | -11.664208 | -6.662384 | -1.964263 |
| 92  | 1 | 0 | -9.615100  | -6.089482 | -1.935028 |
| 93  | 6 | 0 | -10.167184 | 1.697806  | -4.898692 |
| 94  | 1 | 0 | -8.684423  | 0.819442  | -3.600273 |
| 95  | 6 | 0 | -11.812202 | 0.157540  | -5.832752 |
| 96  | 1 | 0 | -11.598601 | -1.912941 | -5.261662 |
| 97  | 8 | 0 | -10.893716 | -5.633721 | -4.910714 |
| 98  | 7 | 0 | -9.412587  | -7.245215 | -4.202721 |
| 99  | 6 | 0 | -13.008432 | -6.321087 | -2.571802 |
| 100 | 1 | 0 | -11.432251 | -7.747289 | -2.143797 |
| 101 | 1 | 0 | -11.711246 | -6.512156 | -0.850999 |
| 102 | 6 | 0 | -11.294174 | 1.453570  | -5.699992 |
| 103 | 1 | 0 | -9.783059  | 2.722667  | -4.793673 |
| 104 | 1 | 0 | -12.696627 | -0.025734 | -6.458473 |
| 105 | 1 | 0 | -8.850940  | -7.555505 | -3.409638 |
| 106 | 6 | 0 | -9.101016  | -7.757981 | -5.528146 |
| 107 | 6 | 0 | -14.049648 | -7.351233 | -2.189046 |
| 108 | 1 | 0 | -13.339208 | -5.308316 | -2.219606 |
| 109 | 1 | 0 | -12.915561 | -6.270322 | -3.690451 |
| 110 | 8 | 0 | -11.840877 | 2.541946  | -6.340924 |
| 111 | 1 | 0 | -9.139197  | -8.853776 | -5.532166 |
| 112 | 1 | 0 | -9.839413  | -7.367706 | -6.231625 |
| 113 | 1 | 0 | -8.102306  | -7.440524 | -5.856677 |
| 114 | 6 | 0 | -15.406260 | -6.971451 | -2.780807 |
| 115 | 1 | 0 | -13.740691 | -8.361716 | -2.564853 |
| 116 | 1 | 0 | -14.122211 | -7.417246 | -1.071788 |
| 117 | 1 | 0 | -12.636730 | 2.244878  | -6.805279 |
| 118 | 7 | 0 | -16.443622 | -7.934991 | -2.498324 |
| 119 | 1 | 0 | -15.668634 | -5.933934 | -2.412854 |
| 120 | 1 | 0 | -15.306439 | -6.906419 | -3.902410 |
| 121 | 1 | 0 | -16.487295 | -8.141843 | -1.520481 |
| 122 | 1 | 0 | -17.331417 | -7.587188 | -2.800649 |
| 123 | 1 | 0 | -4.064060  | 7.468808  | 1.994822  |
| 124 | 7 | 0 | -3.130608  | 7.071978  | 1.844984  |
| 125 | 6 | 0 | -2.150563  | 7.863484  | 1.359967  |
| 126 | 6 | 0 | -2.919305  | 5.662407  | 2.170832  |
| 127 | 6 | 0 | -2.548937  | 9.336520  | 1.096972  |

|     |   |   |           |           |           |
|-----|---|---|-----------|-----------|-----------|
| 128 | 8 | 0 | -0.987993 | 7.481079  | 1.143771  |
| 129 | 6 | 0 | -3.904336 | 4.817633  | 1.338754  |
| 130 | 6 | 0 | -3.130201 | 5.412420  | 3.676901  |
| 131 | 1 | 0 | -1.893494 | 5.416965  | 1.888568  |
| 132 | 7 | 0 | -1.666596 | 10.188649 | 1.906721  |
| 133 | 6 | 0 | -2.462859 | 9.598320  | -0.405163 |
| 134 | 1 | 0 | -3.574573 | 9.520349  | 1.435282  |
| 135 | 8 | 0 | -5.127598 | 4.941644  | 1.496113  |
| 136 | 7 | 0 | -3.333091 | 3.960826  | 0.460641  |
| 137 | 6 | 0 | -2.824452 | 3.958621  | 4.086676  |
| 138 | 1 | 0 | -2.474076 | 6.098473  | 4.226377  |
| 139 | 1 | 0 | -4.163469 | 5.656410  | 3.944889  |
| 140 | 1 | 0 | -0.659965 | 10.146661 | 1.735251  |
| 141 | 6 | 0 | -2.146339 | 11.087229 | 2.805128  |
| 142 | 6 | 0 | -3.427773 | 8.686647  | -1.138370 |
| 143 | 6 | 0 | -2.773917 | 11.044942 | -0.729631 |
| 144 | 1 | 0 | -1.413511 | 9.365316  | -0.751581 |
| 145 | 1 | 0 | -2.313224 | 3.911961  | 0.403634  |
| 146 | 6 | 0 | -4.131299 | 3.102313  | -0.427954 |
| 147 | 6 | 0 | -3.100072 | 3.746284  | 5.571851  |
| 148 | 1 | 0 | -3.484848 | 3.272014  | 3.542793  |
| 149 | 1 | 0 | -1.787433 | 3.701124  | 3.845231  |
| 150 | 6 | 0 | -1.087146 | 11.879024 | 3.557978  |
| 151 | 8 | 0 | -3.354192 | 11.261933 | 3.030862  |
| 152 | 1 | 0 | -3.417438 | 8.918533  | -2.230573 |
| 153 | 1 | 0 | -3.137937 | 7.615955  | -1.003613 |
| 154 | 1 | 0 | -4.468168 | 8.825512  | -0.754299 |
| 155 | 1 | 0 | -2.820389 | 11.186117 | -1.836760 |
| 156 | 1 | 0 | -3.758639 | 11.341446 | -0.292212 |
| 157 | 1 | 0 | -1.985747 | 11.723308 | -0.324285 |
| 158 | 6 | 0 | -3.793451 | 1.634318  | -0.059024 |
| 159 | 6 | 0 | -3.865752 | 3.308123  | -1.917909 |
| 160 | 1 | 0 | -5.184920 | 3.314705  | -0.218481 |
| 161 | 8 | 0 | -4.246995 | 3.813781  | 6.033349  |
| 162 | 7 | 0 | -2.014648 | 3.487992  | 6.343606  |
| 163 | 1 | 0 | -1.308313 | 12.945504 | 3.446747  |
| 164 | 1 | 0 | -1.167477 | 11.636072 | 4.623222  |
| 165 | 1 | 0 | -0.074144 | 11.668425 | 3.206169  |
| 166 | 8 | 0 | -2.622422 | 1.226104  | -0.130976 |
| 167 | 7 | 0 | -4.834461 | 0.884343  | 0.364014  |
| 168 | 6 | 0 | -4.031447 | 4.766386  | -2.324150 |
| 169 | 6 | 0 | -4.817324 | 2.428484  | -2.706715 |
| 170 | 1 | 0 | -2.805484 | 2.990703  | -2.140289 |

|     |   |   |           |           |           |
|-----|---|---|-----------|-----------|-----------|
| 171 | 1 | 0 | -2.163343 | 3.387449  | 7.338832  |
| 172 | 1 | 0 | -1.067826 | 3.461944  | 5.965451  |
| 173 | 1 | 0 | -5.767990 | 1.303365  | 0.397736  |
| 174 | 6 | 0 | -4.668788 | -0.505318 | 0.816636  |
| 175 | 6 | 0 | -3.579516 | 5.019638  | -3.740530 |
| 176 | 1 | 0 | -5.109044 | 5.061869  | -2.210666 |
| 177 | 1 | 0 | -3.432845 | 5.425579  | -1.640771 |
| 178 | 1 | 0 | -4.625782 | 2.527949  | -3.803813 |
| 179 | 1 | 0 | -4.676551 | 1.353129  | -2.435010 |
| 180 | 1 | 0 | -5.878470 | 2.713204  | -2.500337 |
| 181 | 6 | 0 | -5.483439 | -1.435597 | -0.119931 |
| 182 | 6 | 0 | -5.144363 | -0.740464 | 2.248484  |
| 183 | 1 | 0 | -3.601467 | -0.740062 | 0.746713  |
| 184 | 1 | 0 | -3.594656 | 6.116064  | -3.954706 |
| 185 | 1 | 0 | -2.538533 | 4.644189  | -3.895949 |
| 186 | 1 | 0 | -4.249064 | 4.511810  | -4.475820 |
| 187 | 8 | 0 | -6.701549 | -1.268187 | -0.273830 |
| 188 | 7 | 0 | -4.765645 | -2.416029 | -0.715226 |
| 189 | 6 | 0 | -4.942609 | -2.195994 | 2.624524  |
| 190 | 6 | 0 | -4.407581 | 0.150821  | 3.226923  |
| 191 | 1 | 0 | -6.247933 | -0.506108 | 2.303124  |
| 192 | 1 | 0 | -3.754718 | -2.459425 | -0.565083 |
| 193 | 6 | 0 | -5.380313 | -3.432353 | -1.575877 |
| 194 | 1 | 0 | -5.208147 | -2.352793 | 3.697993  |
| 195 | 1 | 0 | -5.593149 | -2.858155 | 2.002971  |
| 196 | 1 | 0 | -3.877504 | -2.498166 | 2.473856  |
| 197 | 1 | 0 | -4.705194 | -0.104159 | 4.273111  |
| 198 | 1 | 0 | -3.303289 | 0.012970  | 3.128248  |
| 199 | 1 | 0 | -4.649519 | 1.226657  | 3.050835  |
| 200 | 6 | 0 | -5.234348 | -4.813083 | -0.886704 |
| 201 | 6 | 0 | -4.731102 | -3.565656 | -2.944388 |
| 202 | 1 | 0 | -6.436938 | -3.168725 | -1.690504 |
| 203 | 8 | 0 | -4.112449 | -5.239176 | -0.566559 |
| 204 | 7 | 0 | -6.386896 | -5.489212 | -0.689787 |
| 205 | 6 | 0 | -4.819483 | -2.327408 | -3.761224 |
| 206 | 1 | 0 | -3.650179 | -3.857169 | -2.818763 |
| 207 | 1 | 0 | -5.244501 | -4.410818 | -3.480010 |
| 208 | 1 | 0 | -7.276579 | -5.043247 | -0.926549 |
| 209 | 6 | 0 | -6.390324 | -6.824867 | -0.079321 |
| 210 | 6 | 0 | -3.835850 | -1.335867 | -3.638854 |
| 211 | 6 | 0 | -5.863053 | -2.151820 | -4.675322 |
| 212 | 6 | 0 | -6.750914 | -7.900072 | -1.136379 |
| 213 | 6 | 0 | -7.301153 | -6.956502 | 1.123627  |



|     |   |   |            |            |           |
|-----|---|---|------------|------------|-----------|
| 214 | 1 | 0 | -5.363139  | -7.003590  | 0.263446  |
| 215 | 6 | 0 | -3.883889  | -0.187076  | -4.419385 |
| 216 | 1 | 0 | -3.018223  | -1.466466  | -2.910031 |
| 217 | 6 | 0 | -5.930000  | -1.007028  | -5.466138 |
| 218 | 1 | 0 | -6.642145  | -2.923659  | -4.774582 |
| 219 | 8 | 0 | -7.713263  | -7.769562  | -1.909512 |
| 220 | 7 | 0 | -5.945259  | -8.982749  | -1.126572 |
| 221 | 6 | 0 | -8.766911  | -6.699019  | 0.849397  |
| 222 | 1 | 0 | -7.174845  | -7.996817  | 1.530339  |
| 223 | 1 | 0 | -6.948216  | -6.243779  | 1.919277  |
| 224 | 6 | 0 | -4.938126  | -0.026181  | -5.334382 |
| 225 | 1 | 0 | -3.118346  | 0.597009   | -4.325407 |
| 226 | 1 | 0 | -6.754519  | -0.872225  | -6.180165 |
| 227 | 1 | 0 | -5.098588  | -8.967639  | -0.555895 |
| 228 | 6 | 0 | -6.156775  | -10.101710 | -2.033440 |
| 229 | 6 | 0 | -9.580570  | -6.922962  | 2.107366  |
| 230 | 1 | 0 | -8.916055  | -5.646849  | 0.483836  |
| 231 | 1 | 0 | -9.124458  | -7.382379  | 0.032579  |
| 232 | 8 | 0 | -4.935128  | 1.133893   | -6.076026 |
| 233 | 1 | 0 | -5.619579  | -10.974322 | -1.651174 |
| 234 | 1 | 0 | -7.223774  | -10.333922 | -2.098035 |
| 235 | 1 | 0 | -5.794715  | -9.879151  | -3.046129 |
| 236 | 6 | 0 | -11.068304 | -6.727456  | 1.822591  |
| 237 | 1 | 0 | -9.404190  | -7.960222  | 2.495964  |
| 238 | 1 | 0 | -9.243624  | -6.206923  | 2.902559  |
| 239 | 1 | 0 | -5.731107  | 1.136709   | -6.627404 |
| 240 | 7 | 0 | -11.904328 | -6.907394  | 2.986191  |
| 241 | 1 | 0 | -11.202380 | -5.709743  | 1.346318  |
| 242 | 1 | 0 | -11.393194 | -7.493862  | 1.060572  |
| 243 | 1 | 0 | -11.556522 | -6.384759  | 3.765261  |
| 244 | 1 | 0 | -12.840722 | -6.616370  | 2.788208  |
| 245 | 1 | 0 | 3.806360   | 3.145534   | 5.071037  |
| 246 | 7 | 0 | 2.873054   | 3.181716   | 5.481001  |
| 247 | 6 | 0 | 1.751371   | 3.302916   | 4.729771  |
| 248 | 1 | 0 | 2.766603   | 3.201973   | 6.486571  |
| 249 | 6 | 0 | 1.960032   | 3.342944   | 3.219896  |
| 250 | 8 | 0 | 0.619915   | 3.385008   | 5.228692  |
| 251 | 6 | 0 | 1.591737   | 4.730104   | 2.657913  |
| 252 | 1 | 0 | 1.303767   | 2.577158   | 2.787779  |
| 253 | 1 | 0 | 2.995237   | 3.088902   | 2.966940  |
| 254 | 6 | 0 | 1.743535   | 4.820443   | 1.126987  |
| 255 | 1 | 0 | 2.241893   | 5.493088   | 3.103221  |
| 256 | 1 | 0 | 0.560815   | 4.974385   | 2.934449  |

|     |   |   |           |           |           |
|-----|---|---|-----------|-----------|-----------|
| 257 | 7 | 0 | 1.479591  | 6.182788  | 0.672008  |
| 258 | 6 | 0 | 0.755324  | 3.870981  | 0.421691  |
| 259 | 1 | 0 | 2.765671  | 4.573117  | 0.833548  |
| 260 | 6 | 0 | 2.401646  | 6.925176  | 0.024990  |
| 261 | 1 | 0 | 0.555640  | 6.585804  | 0.865137  |
| 262 | 8 | 0 | -0.465975 | 4.006504  | 0.583200  |
| 263 | 7 | 0 | 1.320928  | 2.918117  | -0.351975 |
| 264 | 6 | 0 | 1.955819  | 8.360764  | -0.344996 |
| 265 | 8 | 0 | 3.548399  | 6.530391  | -0.250214 |
| 266 | 1 | 0 | 2.340049  | 2.874091  | -0.423370 |
| 267 | 6 | 0 | 0.526896  | 1.926949  | -1.096976 |
| 268 | 7 | 0 | 2.865206  | 9.295681  | 0.332883  |
| 269 | 6 | 0 | 1.947786  | 8.488476  | -1.865994 |
| 270 | 1 | 0 | 0.948486  | 8.556788  | 0.039085  |
| 271 | 6 | 0 | 0.881013  | 0.539138  | -0.504269 |
| 272 | 6 | 0 | 0.799306  | 1.909358  | -2.598563 |
| 273 | 1 | 0 | -0.529842 | 2.156973  | -0.923461 |
| 274 | 1 | 0 | 3.858965  | 9.261688  | 0.097613  |
| 275 | 6 | 0 | 2.426931  | 10.223605 | 1.221595  |
| 276 | 6 | 0 | 0.963292  | 7.496920  | -2.456149 |
| 277 | 6 | 0 | 1.582786  | 9.893692  | -2.298059 |
| 278 | 1 | 0 | 2.980202  | 8.244164  | -2.252872 |
| 279 | 8 | 0 | 2.055212  | 0.131539  | -0.518631 |
| 280 | 7 | 0 | -0.151487 | -0.137244 | 0.042403  |
| 281 | 6 | 0 | 0.459280  | 3.249724  | -3.237356 |
| 282 | 6 | 0 | -0.011490 | 0.797719  | -3.237042 |
| 283 | 1 | 0 | 1.895583  | 1.695699  | -2.762817 |
| 284 | 6 | 0 | 3.512357  | 11.094566 | 1.837207  |
| 285 | 8 | 0 | 1.235892  | 10.368765 | 1.539634  |
| 286 | 1 | 0 | 0.920016  | 7.617281  | -3.565385 |
| 287 | 1 | 0 | 1.274078  | 6.448228  | -2.227722 |
| 288 | 1 | 0 | -0.060210 | 7.664690  | -2.039948 |
| 289 | 1 | 0 | 1.476063  | 9.935059  | -3.409266 |
| 290 | 1 | 0 | 0.613841  | 10.205224 | -1.836868 |
| 291 | 1 | 0 | 2.372024  | 10.622595 | -1.995852 |
| 292 | 1 | 0 | -1.089849 | 0.276074  | 0.020543  |
| 293 | 6 | 0 | 0.034200  | -1.430776 | 0.714541  |
| 294 | 6 | 0 | 1.000077  | 3.364839  | -4.640345 |
| 295 | 1 | 0 | -0.656297 | 3.380743  | -3.247937 |
| 296 | 1 | 0 | 0.884086  | 4.087498  | -2.622978 |
| 297 | 1 | 0 | 0.143169  | 0.790094  | -4.343568 |
| 298 | 1 | 0 | 0.305553  | -0.199137 | -2.841312 |
| 299 | 1 | 0 | -1.101453 | 0.934402  | -3.030564 |

|     |   |   |           |           |           |
|-----|---|---|-----------|-----------|-----------|
| 300 | 1 | 0 | 3.252175  | 12.144281 | 1.666272  |
| 301 | 1 | 0 | 3.515350  | 10.928926 | 2.920050  |
| 302 | 1 | 0 | 4.503902  | 10.885119 | 1.428215  |
| 303 | 6 | 0 | -0.782498 | -2.504625 | -0.047303 |
| 304 | 6 | 0 | -0.421445 | -1.432804 | 2.172288  |
| 305 | 1 | 0 | 1.102552  | -1.667070 | 0.672628  |
| 306 | 1 | 0 | 0.823193  | 4.395267  | -5.033944 |
| 307 | 1 | 0 | 2.099298  | 3.164110  | -4.657733 |
| 308 | 1 | 0 | 0.500687  | 2.639387  | -5.326866 |
| 309 | 8 | 0 | -1.996466 | -2.353424 | -0.240552 |
| 310 | 7 | 0 | -0.074556 | -3.581258 | -0.455107 |
| 311 | 6 | 0 | -0.180571 | -2.799315 | 2.784679  |
| 312 | 6 | 0 | 0.305359  | -0.374017 | 2.975954  |
| 313 | 1 | 0 | -1.529309 | -1.214821 | 2.203794  |
| 314 | 1 | 0 | 0.929084  | -3.620321 | -0.260698 |
| 315 | 6 | 0 | -0.700786 | -4.756346 | -1.078122 |
| 316 | 1 | 0 | -0.394020 | -2.766803 | 3.880651  |
| 317 | 1 | 0 | -0.848473 | -3.564860 | 2.320332  |
| 318 | 1 | 0 | 0.880788  | -3.116948 | 2.637494  |
| 319 | 1 | 0 | 0.032867  | -0.460361 | 4.055936  |
| 320 | 1 | 0 | 1.411331  | -0.497737 | 2.877672  |
| 321 | 1 | 0 | 0.028540  | 0.651112  | 2.630397  |
| 322 | 6 | 0 | -0.553703 | -5.927401 | -0.074859 |
| 323 | 6 | 0 | -0.040500 | -5.198589 | -2.372759 |
| 324 | 1 | 0 | -1.755425 | -4.517560 | -1.254166 |
| 325 | 8 | 0 | 0.579977  | -6.266450 | 0.305206  |
| 326 | 7 | 0 | -1.698717 | -6.509899 | 0.343001  |
| 327 | 6 | 0 | -0.091151 | -4.174681 | -3.448709 |
| 328 | 1 | 0 | 1.033262  | -5.473273 | -2.169415 |
| 329 | 1 | 0 | -0.564713 | -6.133787 | -2.712716 |
| 330 | 1 | 0 | -2.601491 | -6.127151 | 0.045837  |
| 331 | 6 | 0 | -1.658725 | -7.550254 | 1.379081  |
| 332 | 6 | 0 | 0.874859  | -3.159995 | -3.500045 |
| 333 | 6 | 0 | -1.077876 | -4.234297 | -4.438149 |
| 334 | 6 | 0 | -2.383413 | -8.831603 | 0.911345  |
| 335 | 6 | 0 | -2.191828 | -7.114886 | 2.728647  |
| 336 | 1 | 0 | -0.598149 | -7.787063 | 1.521357  |
| 337 | 6 | 0 | 0.864945  | -2.219061 | -4.522926 |
| 338 | 1 | 0 | 1.650359  | -3.104766 | -2.718041 |
| 339 | 6 | 0 | -1.102293 | -3.304213 | -5.474485 |
| 340 | 1 | 0 | -1.846036 | -5.022013 | -4.399910 |
| 341 | 8 | 0 | -3.508248 | -8.814860 | 0.388949  |
| 342 | 7 | 0 | -1.687911 | -9.966051 | 1.147212  |

|     |   |   |           |            |           |
|-----|---|---|-----------|------------|-----------|
| 343 | 6 | 0 | -3.626440 | -6.635602  | 2.739983  |
| 344 | 1 | 0 | -2.083517 | -7.983472  | 3.434274  |
| 345 | 1 | 0 | -1.528309 | -6.290686  | 3.114516  |
| 346 | 6 | 0 | -0.128732 | -2.296909  | -5.513101 |
| 347 | 1 | 0 | 1.615809  | -1.416446  | -4.565061 |
| 348 | 1 | 0 | -1.881964 | -3.352912  | -6.247335 |
| 349 | 1 | 0 | -0.735208 | -9.890113  | 1.504615  |
| 350 | 6 | 0 | -2.221921 | -11.279551 | 0.818339  |
| 351 | 6 | 0 | -4.021999 | -6.239238  | 4.148175  |
| 352 | 1 | 0 | -3.751416 | -5.760890  | 2.046646  |
| 353 | 1 | 0 | -4.301178 | -7.449531  | 2.360952  |
| 354 | 8 | 0 | -0.081071 | -1.345868  | -6.507161 |
| 355 | 1 | 0 | -1.669609 | -12.039198 | 1.378777  |
| 356 | 1 | 0 | -3.280518 | -11.331835 | 1.089833  |
| 357 | 1 | 0 | -2.132803 | -11.497404 | -0.254228 |
| 358 | 6 | 0 | -5.450802 | -5.701697  | 4.176557  |
| 359 | 1 | 0 | -3.936553 | -7.126375  | 4.829457  |
| 360 | 1 | 0 | -3.310090 | -5.459392  | 4.530816  |
| 361 | 1 | 0 | -0.870295 | -1.451477  | -7.058227 |
| 362 | 7 | 0 | -5.888611 | -5.313977  | 5.496539  |
| 363 | 1 | 0 | -5.520160 | -4.851410  | 3.430381  |
| 364 | 1 | 0 | -6.147263 | -6.515453  | 3.821450  |
| 365 | 1 | 0 | -5.248062 | -4.669570  | 5.914856  |
| 366 | 1 | 0 | -6.795568 | -4.894346  | 5.452594  |
| 367 | 1 | 0 | 8.659266  | 2.813489   | 4.089450  |
| 368 | 7 | 0 | 7.738139  | 2.910232   | 4.511847  |
| 369 | 6 | 0 | 6.594706  | 2.914747   | 3.783154  |
| 370 | 1 | 0 | 7.658117  | 3.039062   | 5.511858  |
| 371 | 6 | 0 | 6.759450  | 2.760039   | 2.274941  |
| 372 | 8 | 0 | 5.476675  | 3.042829   | 4.300885  |
| 373 | 6 | 0 | 6.295758  | 4.033907   | 1.542314  |
| 374 | 1 | 0 | 6.138284  | 1.906253   | 1.975884  |
| 375 | 1 | 0 | 7.799062  | 2.525361   | 2.020717  |
| 376 | 6 | 0 | 6.370883  | 3.916217   | 0.005621  |
| 377 | 1 | 0 | 6.924814  | 4.880950   | 1.842175  |
| 378 | 1 | 0 | 5.267799  | 4.269211   | 1.836698  |
| 379 | 7 | 0 | 6.035943  | 5.197184   | -0.611805 |
| 380 | 6 | 0 | 5.386704  | 2.845635   | -0.505175 |
| 381 | 1 | 0 | 7.386928  | 3.664114   | -0.302746 |
| 382 | 1 | 0 | 5.102181  | 5.589791   | -0.444544 |
| 383 | 6 | 0 | 6.916274  | 5.890539   | -1.364091 |
| 384 | 8 | 0 | 4.168221  | 2.995634   | -0.340966 |
| 385 | 7 | 0 | 5.947983  | 1.771102   | -1.104613 |

|     |   |   |          |           |           |
|-----|---|---|----------|-----------|-----------|
| 386 | 6 | 0 | 6.407711 | 7.254088  | -1.895659 |
| 387 | 8 | 0 | 8.070232 | 5.501354  | -1.621811 |
| 388 | 1 | 0 | 6.963605 | 1.736626  | -1.207944 |
| 389 | 6 | 0 | 5.150147 | 0.656678  | -1.649706 |
| 390 | 7 | 0 | 7.317073 | 8.304151  | -1.411712 |
| 391 | 6 | 0 | 6.305843 | 7.168593  | -3.416184 |
| 392 | 1 | 0 | 5.417938 | 7.474815  | -1.480501 |
| 393 | 6 | 0 | 5.545473 | -0.613631 | -0.851288 |
| 394 | 6 | 0 | 5.380519 | 0.395790  | -3.135331 |
| 395 | 1 | 0 | 4.095243 | 0.899132  | -1.482488 |
| 396 | 6 | 0 | 6.890741 | 9.326115  | -0.622845 |
| 397 | 1 | 0 | 8.287131 | 8.300789  | -1.728178 |
| 398 | 6 | 0 | 5.322029 | 6.079571  | -3.800160 |
| 399 | 6 | 0 | 5.869403 | 8.490322  | -4.013789 |
| 400 | 1 | 0 | 7.321018 | 6.898589  | -3.830314 |
| 401 | 8 | 0 | 6.723976 | -1.009478 | -0.844450 |
| 402 | 7 | 0 | 4.541126 | -1.202562 | -0.164261 |
| 403 | 6 | 0 | 4.978338 | 1.599227  | -3.978092 |
| 404 | 6 | 0 | 4.593674 | -0.832526 | -3.552058 |
| 405 | 1 | 0 | 6.478589 | 0.189589  | -3.297166 |
| 406 | 6 | 0 | 7.960980 | 10.326863 | -0.213914 |
| 407 | 8 | 0 | 5.719670 | 9.452523  | -0.234213 |
| 408 | 1 | 0 | 5.182096 | 6.065412  | -4.907851 |
| 409 | 1 | 0 | 5.698444 | 5.077186  | -3.480844 |
| 410 | 1 | 0 | 4.329890 | 6.258794  | -3.317711 |
| 411 | 1 | 0 | 5.695603 | 8.373301  | -5.111093 |
| 412 | 1 | 0 | 4.919691 | 8.839318  | -3.539707 |
| 413 | 1 | 0 | 6.650712 | 9.273556  | -3.866424 |
| 414 | 1 | 0 | 3.598531 | -0.802202 | -0.217381 |
| 415 | 6 | 0 | 4.779105 | -2.340786 | 0.735836  |
| 416 | 6 | 0 | 5.514361 | 1.510601  | -5.384927 |
| 417 | 1 | 0 | 3.858026 | 1.676038  | -4.002161 |
| 418 | 1 | 0 | 5.362589 | 2.544123  | -3.509912 |
| 419 | 1 | 0 | 4.676557 | -0.990630 | -4.654827 |
| 420 | 1 | 0 | 4.993089 | -1.745670 | -3.044274 |
| 421 | 1 | 0 | 3.513373 | -0.718890 | -3.288938 |
| 422 | 1 | 0 | 7.610301 | 11.330842 | -0.473573 |
| 423 | 1 | 0 | 8.069643 | 10.289100 | 0.875636  |
| 424 | 1 | 0 | 8.925970 | 10.134486 | -0.688457 |
| 425 | 6 | 0 | 3.918776 | -3.543854 | 0.272131  |
| 426 | 6 | 0 | 4.430558 | -2.048849 | 2.194876  |
| 427 | 1 | 0 | 5.843752 | -2.586324 | 0.663363  |
| 428 | 1 | 0 | 5.282830 | 2.451044  | -5.941544 |

|     |   |   |          |            |           |
|-----|---|---|----------|------------|-----------|
| 429 | 1 | 0 | 6.622781 | 1.368114   | -5.377157 |
| 430 | 1 | 0 | 5.055985 | 0.656111   | -5.938780 |
| 431 | 8 | 0 | 2.693594 | -3.426880  | 0.133965  |
| 432 | 7 | 0 | 4.603891 | -4.691932  | 0.068221  |
| 433 | 6 | 0 | 4.775087 | -3.245880  | 3.059989  |
| 434 | 6 | 0 | 5.163356 | -0.823622  | 2.702129  |
| 435 | 1 | 0 | 3.319063 | -1.861084  | 2.266421  |
| 436 | 1 | 0 | 5.623700 | -4.681186  | 0.133856  |
| 437 | 6 | 0 | 3.950557 | -5.964373  | -0.279182 |
| 438 | 1 | 0 | 4.602146 | -2.998857  | 4.135733  |
| 439 | 1 | 0 | 4.138016 | -4.124579  | 2.796963  |
| 440 | 1 | 0 | 5.847747 | -3.530643  | 2.930184  |
| 441 | 1 | 0 | 5.002392 | -0.709761  | 3.801784  |
| 442 | 1 | 0 | 6.260424 | -0.915189  | 2.511471  |
| 443 | 1 | 0 | 4.788666 | 0.101126   | 2.200673  |
| 444 | 6 | 0 | 4.095857 | -6.907725  | 0.943896  |
| 445 | 6 | 0 | 4.587344 | -6.674568  | -1.461373 |
| 446 | 1 | 0 | 2.895910 | -5.751913  | -0.485661 |
| 447 | 8 | 0 | 5.230200 | -7.242864  | 1.329069  |
| 448 | 7 | 0 | 2.947574 | -7.301764  | 1.539690  |
| 449 | 6 | 0 | 4.626236 | -5.855503  | -2.700932 |
| 450 | 1 | 0 | 5.636984 | -6.982422  | -1.188055 |
| 451 | 1 | 0 | 4.000077 | -7.616047  | -1.642908 |
| 452 | 1 | 0 | 2.046668 | -6.969241  | 1.181445  |
| 453 | 6 | 0 | 2.996176 | -8.124775  | 2.754082  |
| 454 | 6 | 0 | 5.670474 | -4.942173  | -2.906353 |
| 455 | 6 | 0 | 3.646142 | -6.012222  | -3.685870 |
| 456 | 6 | 0 | 2.173136 | -9.423609  | 2.588565  |
| 457 | 6 | 0 | 2.594827 | -7.412321  | 4.029769  |
| 458 | 1 | 0 | 4.048625 | -8.402914  | 2.874462  |
| 459 | 6 | 0 | 5.738812 | -4.191832  | -4.074166 |
| 460 | 1 | 0 | 6.446287 | -4.813726  | -2.131347 |
| 461 | 6 | 0 | 3.700317 | -5.274304  | -4.865807 |
| 462 | 1 | 0 | 2.819952 | -6.722961  | -3.529721 |
| 463 | 8 | 0 | 1.019606 | -9.442513  | 2.133698  |
| 464 | 7 | 0 | 2.822090 | -10.533796 | 3.006771  |
| 465 | 6 | 0 | 1.199264 | -6.829258  | 4.048240  |
| 466 | 1 | 0 | 2.700546 | -8.148631  | 4.873401  |
| 467 | 1 | 0 | 3.337082 | -6.586720  | 4.220636  |
| 468 | 6 | 0 | 4.746986 | -4.361779  | -5.054845 |
| 469 | 1 | 0 | 6.553527 | -3.471297  | -4.240163 |
| 470 | 1 | 0 | 2.925413 | -5.398022  | -5.635106 |
| 471 | 1 | 0 | 3.791803 | -10.447580 | 3.306603  |

|     |   |   |           |            |           |
|-----|---|---|-----------|------------|-----------|
| 472 | 6 | 0 | 2.198177  | -11.848878 | 2.969409  |
| 473 | 6 | 0 | 0.917183  | -6.227939  | 5.410871  |
| 474 | 1 | 0 | 1.096392  | -6.042612  | 3.253994  |
| 475 | 1 | 0 | 0.447762  | -7.630490  | 3.812013  |
| 476 | 8 | 0 | 4.868175  | -3.594297  | -6.190968 |
| 477 | 1 | 0 | 2.826108  | -12.553763 | 3.520994  |
| 478 | 1 | 0 | 1.206708  | -11.815474 | 3.433130  |
| 479 | 1 | 0 | 2.081939  | -12.210025 | 1.939759  |
| 480 | 6 | 0 | -0.490321 | -5.639284  | 5.467431  |
| 481 | 1 | 0 | 1.029421  | -7.015202  | 6.202375  |
| 482 | 1 | 0 | 1.675256  | -5.428521  | 5.629689  |
| 483 | 1 | 0 | 4.090039  | -3.756192  | -6.744201 |
| 484 | 7 | 0 | -0.819881 | -5.077542  | 6.755137  |
| 485 | 1 | 0 | -0.587819 | -4.884941  | 4.626524  |
| 486 | 1 | 0 | -1.236787 | -6.461641  | 5.261433  |
| 487 | 1 | 0 | -0.157845 | -4.379265  | 7.027117  |
| 488 | 1 | 0 | -1.736220 | -4.677115  | 6.736036  |
| 489 | 1 | 0 | 13.514290 | 2.111903   | 3.091471  |
| 490 | 7 | 0 | 12.627133 | 2.303978   | 3.532085  |
| 491 | 6 | 0 | 11.460193 | 2.323749   | 2.826586  |
| 492 | 1 | 0 | 12.602890 | 2.518757   | 4.520326  |
| 493 | 6 | 0 | 11.565529 | 2.014562   | 1.337570  |
| 494 | 8 | 0 | 10.380311 | 2.577614   | 3.365768  |
| 495 | 6 | 0 | 11.053637 | 3.200849   | 0.498154  |
| 496 | 1 | 0 | 10.948296 | 1.123659   | 1.163371  |
| 497 | 1 | 0 | 12.594856 | 1.758276   | 1.057829  |
| 498 | 6 | 0 | 11.023226 | 2.924051   | -1.022322 |
| 499 | 1 | 0 | 11.696356 | 4.074081   | 0.660260  |
| 500 | 1 | 0 | 10.045027 | 3.467924   | 0.829173  |
| 501 | 7 | 0 | 10.602407 | 4.112013   | -1.751218 |
| 502 | 6 | 0 | 10.031663 | 1.792917   | -1.337448 |
| 503 | 1 | 0 | 12.030632 | 2.676121   | -1.372256 |
| 504 | 6 | 0 | 11.489192 | 4.888237   | -2.425589 |
| 505 | 1 | 0 | 9.625073  | 4.413607   | -1.682094 |
| 506 | 8 | 0 | 8.816836  | 1.983902   | -1.196744 |
| 507 | 7 | 0 | 10.565909 | 0.618780   | -1.742920 |
| 508 | 6 | 0 | 10.863740 | 6.106347   | -3.149341 |
| 509 | 8 | 0 | 12.706330 | 4.675141   | -2.472820 |
| 510 | 1 | 0 | 11.572367 | 0.505784   | -1.765514 |
| 511 | 6 | 0 | 9.762333  | -0.595945  | -1.973136 |
| 512 | 7 | 0 | 11.774114 | 7.237270   | -2.926512 |
| 513 | 6 | 0 | 10.640405 | 5.755454   | -4.618831 |
| 514 | 1 | 0 | 9.899367  | 6.366324   | -2.700471 |

|     |   |   |           |           |           |
|-----|---|---|-----------|-----------|-----------|
| 515 | 6 | 0 | 10.239675 | -1.640659 | -0.925882 |
| 516 | 6 | 0 | 9.908349  | -1.174330 | -3.377415 |
| 517 | 1 | 0 | 8.714007  | -0.329979 | -1.801903 |
| 518 | 6 | 0 | 11.371405 | 8.427882  | -2.411663 |
| 519 | 1 | 0 | 12.761788 | 7.036682  | -3.028414 |
| 520 | 6 | 0 | 9.620444  | 4.636944  | -4.726620 |
| 521 | 6 | 0 | 10.164865 | 6.962616  | -5.402419 |
| 522 | 1 | 0 | 11.614684 | 5.401419  | -5.061699 |
| 523 | 8 | 0 | 11.445108 | -1.790958 | -0.697112 |
| 524 | 7 | 0 | 9.242688  | -2.328228 | -0.306065 |
| 525 | 6 | 0 | 9.418853  | -0.190125 | -4.434165 |
| 526 | 6 | 0 | 9.125300  | -2.471601 | -3.465621 |
| 527 | 1 | 0 | 10.997125 | -1.396468 | -3.568633 |
| 528 | 6 | 0 | 12.475940 | 9.443039  | -2.155094 |
| 529 | 8 | 0 | 10.188287 | 8.696625  | -2.160428 |
| 530 | 1 | 0 | 9.280453  | 4.529955  | -5.785009 |
| 531 | 1 | 0 | 10.063893 | 3.663912  | -4.405716 |
| 532 | 1 | 0 | 8.729482  | 4.852710  | -4.084757 |
| 533 | 1 | 0 | 9.891539  | 6.659407  | -6.442278 |
| 534 | 1 | 0 | 9.267052  | 7.415852  | -4.915724 |
| 535 | 1 | 0 | 10.964038 | 7.738900  | -5.466533 |
| 536 | 1 | 0 | 8.272235  | -2.037502 | -0.453048 |
| 537 | 6 | 0 | 9.535087  | -3.299071 | 0.752840  |
| 538 | 6 | 0 | 9.969808  | -0.509601 | -5.801116 |
| 539 | 1 | 0 | 8.296211  | -0.209749 | -4.464455 |
| 540 | 1 | 0 | 9.719247  | 0.856521  | -4.164497 |
| 541 | 1 | 0 | 9.029611  | -2.793627 | -4.530715 |
| 542 | 1 | 0 | 9.645596  | -3.282996 | -2.901930 |
| 543 | 1 | 0 | 8.098676  | -2.341284 | -3.040497 |
| 544 | 1 | 0 | 12.266716 | 10.341833 | -2.743807 |
| 545 | 1 | 0 | 12.450733 | 9.727068  | -1.098317 |
| 546 | 1 | 0 | 13.474939 | 9.073761  | -2.406238 |
| 547 | 6 | 0 | 8.646149  | -4.547549 | 0.529508  |
| 548 | 6 | 0 | 9.288697  | -2.789083 | 2.175857  |
| 549 | 1 | 0 | 10.598691 | -3.549056 | 0.654947  |
| 550 | 1 | 0 | 9.590106  | 0.229664  | -6.547623 |
| 551 | 1 | 0 | 11.085933 | -0.465481 | -5.798067 |
| 552 | 1 | 0 | 9.661180  | -1.530552 | -6.132001 |
| 553 | 8 | 0 | 7.459904  | -4.428648 | 0.199816  |
| 554 | 7 | 0 | 9.255629  | -5.741742 | 0.734366  |
| 555 | 6 | 0 | 9.907873  | -3.732091 | 3.189717  |
| 556 | 6 | 0 | 9.856077  | -1.395357 | 2.364545  |
| 557 | 1 | 0 | 8.174723  | -2.745617 | 2.353272  |



|     |   |   |           |            |           |
|-----|---|---|-----------|------------|-----------|
| 558 | 1 | 0 | 10.185322 | -5.743264  | 1.141724  |
| 559 | 6 | 0 | 8.517438  | -7.007533  | 0.861341  |
| 560 | 1 | 0 | 9.810446  | -3.300324  | 4.215781  |
| 561 | 1 | 0 | 9.402388  | -4.728217  | 3.189829  |
| 562 | 1 | 0 | 10.993634 | -3.884584  | 2.976562  |
| 563 | 1 | 0 | 9.887933  | -1.136503  | 3.450582  |
| 564 | 1 | 0 | 10.892474 | -1.335684  | 1.950195  |
| 565 | 1 | 0 | 9.221669  | -0.635858  | 1.846489  |
| 566 | 6 | 0 | 8.644373  | -7.471071  | 2.338505  |
| 567 | 1 | 0 | 7.472761  | -6.820696  | 0.590726  |
| 568 | 8 | 0 | 9.706033  | -7.306899  | 2.948288  |
| 569 | 7 | 0 | 7.560785  | -8.112634  | 2.857130  |
| 570 | 6 | 0 | 9.118301  | -7.832231  | -1.442547 |
| 571 | 1 | 0 | 6.645762  | -7.991507  | 2.413448  |
| 572 | 6 | 0 | 7.635337  | -8.627564  | 4.226539  |
| 573 | 6 | 0 | 10.255205 | -7.236254  | -2.005416 |
| 574 | 6 | 0 | 6.682390  | -9.830601  | 4.399231  |
| 575 | 6 | 0 | 7.381314  | -7.611526  | 5.326183  |
| 576 | 1 | 0 | 8.670979  | -8.969714  | 4.360802  |
| 577 | 6 | 0 | 10.323960 | -6.976404  | -3.368855 |
| 578 | 1 | 0 | 11.105303 | -6.968337  | -1.359193 |
| 579 | 8 | 0 | 5.594929  | -9.919122  | 3.817928  |
| 580 | 7 | 0 | 7.121366  | -10.771219 | 5.274206  |
| 581 | 6 | 0 | 6.018307  | -6.957402  | 5.272950  |
| 582 | 1 | 0 | 7.508831  | -8.128493  | 6.315293  |
| 583 | 1 | 0 | 8.175736  | -6.817751  | 5.261354  |
| 584 | 6 | 0 | 9.233268  | -7.322153  | -4.184472 |
| 585 | 1 | 0 | 11.211177 | -6.508703  | -3.817750 |
| 586 | 1 | 0 | 8.045081  | -10.665655 | 5.670966  |
| 587 | 6 | 0 | 6.330697  | -11.942703 | 5.635520  |
| 588 | 6 | 0 | 5.819616  | -6.060292  | 6.476870  |
| 589 | 1 | 0 | 5.916926  | -6.355902  | 4.330504  |
| 590 | 1 | 0 | 5.218039  | -7.745863  | 5.242575  |
| 591 | 8 | 0 | 9.358859  | -7.047370  | -5.526560 |
| 592 | 1 | 0 | 6.717345  | -12.360214 | 6.569000  |
| 593 | 1 | 0 | 5.286190  | -11.652750 | 5.780798  |
| 594 | 1 | 0 | 6.373540  | -12.713144 | 4.855900  |
| 595 | 6 | 0 | 4.439306  | -5.407516  | 6.434186  |
| 596 | 1 | 0 | 5.925028  | -6.659863  | 7.418981  |
| 597 | 1 | 0 | 6.617077  | -5.271609  | 6.492136  |
| 598 | 1 | 0 | 8.524956  | -7.283184  | -5.958652 |
| 599 | 7 | 0 | 4.173180  | -4.568343  | 7.577147  |
| 600 | 1 | 0 | 4.346923  | -4.848233  | 5.452378  |

|     |   |   |           |           |           |
|-----|---|---|-----------|-----------|-----------|
| 601 | 1 | 0 | 3.654295  | -6.219846 | 6.423401  |
| 602 | 1 | 0 | 4.873883  | -3.862307 | 7.680088  |
| 603 | 1 | 0 | 3.275459  | -4.136087 | 7.490216  |
| 604 | 6 | 0 | 8.090513  | -7.921914 | -3.637401 |
| 605 | 1 | 0 | 7.240596  | -8.187004 | -4.281636 |
| 606 | 6 | 0 | 8.041307  | -8.170683 | -2.268312 |
| 607 | 1 | 0 | 7.144589  | -8.639595 | -1.834171 |
| 608 | 6 | 0 | 9.076521  | -8.137533 | 0.011243  |
| 609 | 1 | 0 | 8.426962  | -9.038821 | 0.189064  |
| 610 | 1 | 0 | 10.112352 | -8.395938 | 0.366949  |

P PI (Ac-VQIVYK-NHMe)<sub>6</sub>

|    |   |   |            |           |           |
|----|---|---|------------|-----------|-----------|
| 1  | 6 | 0 | -10.002643 | 11.162988 | 5.763445  |
| 2  | 6 | 0 | -10.832234 | 10.445080 | 4.706574  |
| 3  | 1 | 0 | -10.469754 | 12.131459 | 5.971304  |
| 4  | 1 | 0 | -10.038203 | 10.576576 | 6.687637  |
| 5  | 1 | 0 | -8.962823  | 11.309465 | 5.458309  |
| 6  | 8 | 0 | -12.029758 | 10.193755 | 4.873628  |
| 7  | 7 | 0 | -10.145857 | 10.109702 | 3.572185  |
| 8  | 1 | 0 | -9.143476  | 10.293897 | 3.505594  |
| 9  | 6 | 0 | -10.802976 | 9.371286  | 2.489658  |
| 10 | 6 | 0 | -10.310438 | 7.905520  | 2.552931  |
| 11 | 6 | 0 | -10.517801 | 9.915278  | 1.094057  |
| 12 | 1 | 0 | -11.879640 | 9.430590  | 2.691904  |
| 13 | 8 | 0 | -9.119842  | 7.635198  | 2.335869  |
| 14 | 7 | 0 | -11.233669 | 6.977391  | 2.896228  |
| 15 | 6 | 0 | -11.332598 | 9.147113  | 0.070954  |
| 16 | 6 | 0 | -10.829851 | 11.394314 | 0.998827  |
| 17 | 1 | 0 | -9.421279  | 9.761228  | 0.868879  |
| 18 | 1 | 0 | -12.195036 | 7.264457  | 3.038272  |
| 19 | 6 | 0 | -10.935774 | 5.550225  | 3.017315  |
| 20 | 1 | 0 | -11.096275 | 9.515062  | -0.956534 |
| 21 | 1 | 0 | -11.097836 | 8.055441  | 0.116405  |
| 22 | 1 | 0 | -12.425819 | 9.285175  | 0.252332  |
| 23 | 1 | 0 | -10.751265 | 11.731430 | -0.063366 |
| 24 | 1 | 0 | -11.865303 | 11.602519 | 1.361189  |
| 25 | 1 | 0 | -10.111437 | 11.992037 | 1.609471  |
| 26 | 6 | 0 | -11.749656 | 4.796528  | 1.945700  |
| 27 | 6 | 0 | -11.277898 | 5.037763  | 4.431447  |
| 28 | 1 | 0 | -9.866831  | 5.438540  | 2.824476  |
| 29 | 8 | 0 | -12.967842 | 4.958869  | 1.841177  |
| 30 | 7 | 0 | -11.016680 | 3.943142  | 1.173205  |
| 31 | 6 | 0 | -10.794000 | 3.597354  | 4.679383  |
| 32 | 1 | 0 | -10.802216 | 5.713167  | 5.153636  |
| 33 | 1 | 0 | -12.360184 | 5.088188  | 4.594511  |
| 34 | 1 | 0 | -9.996440  | 3.973826  | 1.230276  |
| 35 | 6 | 0 | -11.621158 | 3.194588  | 0.061542  |
| 36 | 6 | 0 | -11.161603 | 3.136563  | 6.092184  |
| 37 | 1 | 0 | -11.291917 | 2.911777  | 3.982169  |
| 38 | 1 | 0 | -9.713591  | 3.519853  | 4.512663  |
| 39 | 6 | 0 | -11.099942 | 1.743144  | 0.180235  |
| 40 | 6 | 0 | -11.270658 | 3.733052  | -1.324897 |
| 41 | 1 | 0 | -12.707487 | 3.251606  | 0.200873  |

|    |   |   |            |           |           |
|----|---|---|------------|-----------|-----------|
| 42 | 8 | 0 | -12.331403 | 3.094342  | 6.478328  |
| 43 | 7 | 0 | -10.105230 | 2.773427  | 6.877013  |
| 44 | 8 | 0 | -9.882089  | 1.517847  | 0.144239  |
| 45 | 7 | 0 | -12.030944 | 0.772543  | 0.350928  |
| 46 | 6 | 0 | -11.852897 | 5.125751  | -1.533693 |
| 47 | 6 | 0 | -11.781883 | 2.785600  | -2.391784 |
| 48 | 1 | 0 | -10.145760 | 3.789312  | -1.410577 |
| 49 | 1 | 0 | -10.311922 | 2.514830  | 7.832290  |
| 50 | 1 | 0 | -9.137114  | 2.886872  | 6.583226  |
| 51 | 1 | 0 | -13.014179 | 1.014856  | 0.374798  |
| 52 | 6 | 0 | -11.677625 | -0.644413 | 0.555226  |
| 53 | 6 | 0 | -11.146208 | 5.873674  | -2.635662 |
| 54 | 1 | 0 | -12.945424 | 5.036813  | -1.774970 |
| 55 | 1 | 0 | -11.778100 | 5.723011  | -0.585755 |
| 56 | 1 | 0 | -11.602004 | 3.221435  | -3.404740 |
| 57 | 1 | 0 | -11.251532 | 1.803104  | -2.334764 |
| 58 | 1 | 0 | -12.878364 | 2.606805  | -2.275122 |
| 59 | 6 | 0 | -12.438376 | -1.483921 | -0.505730 |
| 60 | 6 | 0 | -12.040794 | -1.173731 | 1.940134  |
| 61 | 1 | 0 | -10.595565 | -0.721562 | 0.411907  |
| 62 | 1 | 0 | -11.556825 | 6.909357  | -2.718142 |
| 63 | 1 | 0 | -10.050626 | 5.944571  | -2.426575 |
| 64 | 1 | 0 | -11.282090 | 5.363006  | -3.619436 |
| 65 | 8 | 0 | -13.663635 | -1.401248 | -0.616890 |
| 66 | 7 | 0 | -11.641226 | -2.291569 | -1.263421 |
| 67 | 6 | 0 | -11.565054 | -2.608182 | 2.073146  |
| 68 | 6 | 0 | -11.430987 | -0.326315 | 3.037990  |
| 69 | 1 | 0 | -13.163307 | -1.155621 | 2.050532  |
| 70 | 1 | 0 | -10.630663 | -2.279648 | -1.113098 |
| 71 | 6 | 0 | -12.189880 | -3.192153 | -2.271972 |
| 72 | 1 | 0 | -11.753263 | -2.976628 | 3.110207  |
| 73 | 1 | 0 | -12.110084 | -3.271624 | 1.359422  |
| 74 | 1 | 0 | -10.469864 | -2.679803 | 1.860682  |
| 75 | 1 | 0 | -11.604864 | -0.807306 | 4.031247  |
| 76 | 1 | 0 | -10.329902 | -0.216734 | 2.883819  |
| 77 | 1 | 0 | -11.888854 | 0.691833  | 3.063405  |
| 78 | 6 | 0 | -11.671591 | -4.634918 | -2.030858 |
| 79 | 6 | 0 | -11.846385 | -2.834390 | -3.715250 |
| 80 | 1 | 0 | -13.281242 | -3.159886 | -2.155670 |
| 81 | 8 | 0 | -10.552921 | -4.855712 | -1.548922 |
| 82 | 7 | 0 | -12.529433 | -5.612591 | -2.417722 |
| 83 | 6 | 0 | -12.718778 | -1.757968 | -4.256175 |
| 84 | 1 | 0 | -10.765622 | -2.528650 | -3.796633 |

|     |   |   |            |            |           |
|-----|---|---|------------|------------|-----------|
| 85  | 1 | 0 | -11.971911 | -3.752820  | -4.353851 |
| 86  | 1 | 0 | -13.354659 | -5.346116  | -2.944982 |
| 87  | 6 | 0 | -12.114842 | -7.013851  | -2.573943 |
| 88  | 6 | 0 | -12.331963 | -0.415162  | -4.166490 |
| 89  | 6 | 0 | -13.928471 | -2.084161  | -4.880467 |
| 90  | 6 | 0 | -12.024628 | -7.328763  | -4.093269 |
| 91  | 6 | 0 | -13.042802 | -8.008618  | -1.907183 |
| 92  | 1 | 0 | -11.124879 | -7.111280  | -2.112494 |
| 93  | 6 | 0 | -13.133851 | 0.593502   | -4.688937 |
| 94  | 1 | 0 | -11.385225 | -0.151873  | -3.668105 |
| 95  | 6 | 0 | -14.744596 | -1.089799  | -5.411942 |
| 96  | 1 | 0 | -14.239159 | -3.137812  | -4.955698 |
| 97  | 8 | 0 | -12.820529 | -6.824135  | -4.892656 |
| 98  | 7 | 0 | -11.036034 | -8.196753  | -4.421153 |
| 99  | 6 | 0 | -14.489642 | -7.886468  | -2.336301 |
| 100 | 1 | 0 | -12.662517 | -9.038708  | -2.146475 |
| 101 | 1 | 0 | -12.974057 | -7.879316  | -0.792422 |
| 102 | 6 | 0 | -14.343452 | 0.250019   | -5.313933 |
| 103 | 1 | 0 | -12.840646 | 1.650418   | -4.607972 |
| 104 | 1 | 0 | -15.694727 | -1.350946  | -5.898044 |
| 105 | 1 | 0 | -10.343184 | -8.429204  | -3.709496 |
| 106 | 6 | 0 | -10.816420 | -8.636517  | -5.790350 |
| 107 | 6 | 0 | -15.294957 | -9.076445  | -1.859584 |
| 108 | 1 | 0 | -14.932685 | -6.944547  | -1.917178 |
| 109 | 1 | 0 | -14.546680 | -7.811165  | -3.455940 |
| 110 | 8 | 0 | -15.090060 | 1.288483   | -5.822439 |
| 111 | 1 | 0 | -10.670021 | -9.722634  | -5.822966 |
| 112 | 1 | 0 | -11.694390 | -8.371743  | -6.383334 |
| 113 | 1 | 0 | -9.936482  | -8.150304  | -6.232620 |
| 114 | 6 | 0 | -16.758713 | -8.917597  | -2.268123 |
| 115 | 1 | 0 | -14.877505 | -10.019208 | -2.300800 |
| 116 | 1 | 0 | -15.214125 | -9.164242  | -0.744366 |
| 117 | 1 | 0 | -15.918206 | 0.920430   | -6.162892 |
| 118 | 7 | 0 | -17.583769 | -10.040011 | -1.888721 |
| 119 | 1 | 0 | -17.135748 | -7.940264  | -1.839972 |
| 120 | 1 | 0 | -16.813262 | -8.826719  | -3.391039 |
| 121 | 1 | 0 | -17.468590 | -10.261047 | -0.919809 |
| 122 | 1 | 0 | -18.547032 | -9.838020  | -2.067333 |
| 123 | 1 | 0 | -7.456226  | 6.944644   | 2.195049  |
| 124 | 7 | 0 | -6.469949  | 6.682972   | 2.094013  |
| 125 | 6 | 0 | -5.570254  | 7.628370   | 1.749287  |
| 126 | 6 | 0 | -6.093609  | 5.294172   | 2.355374  |
| 127 | 6 | 0 | -6.138406  | 9.054991   | 1.549248  |

|     |   |   |           |           |           |
|-----|---|---|-----------|-----------|-----------|
| 128 | 8 | 0 | -4.354034 | 7.415659  | 1.608969  |
| 129 | 6 | 0 | -6.920810 | 4.384596  | 1.425890  |
| 130 | 6 | 0 | -6.341158 | 4.932175  | 3.832445  |
| 131 | 1 | 0 | -5.032641 | 5.197870  | 2.116876  |
| 132 | 7 | 0 | -5.419495 | 9.953378  | 2.463792  |
| 133 | 6 | 0 | -6.001916 | 9.426156  | 0.074173  |
| 134 | 1 | 0 | -7.196779 | 9.087844  | 1.830241  |
| 135 | 8 | 0 | -8.155926 | 4.344981  | 1.519614  |
| 136 | 7 | 0 | -6.201126 | 3.659763  | 0.537562  |
| 137 | 6 | 0 | -5.867513 | 3.508446  | 4.183997  |
| 138 | 1 | 0 | -5.806495 | 5.663611  | 4.450748  |
| 139 | 1 | 0 | -7.408682 | 5.026674  | 4.056571  |
| 140 | 1 | 0 | -4.406884 | 10.045513 | 2.359119  |
| 141 | 6 | 0 | -6.058782 | 10.707906 | 3.394251  |
| 142 | 6 | 0 | -6.800766 | 8.453740  | -0.772191 |
| 143 | 6 | 0 | -6.475763 | 10.841956 | -0.182310 |
| 144 | 1 | 0 | -4.913717 | 9.348577  | -0.217613 |
| 145 | 1 | 0 | -5.182077 | 3.747249  | 0.533542  |
| 146 | 6 | 0 | -6.835660 | 2.772214  | -0.450294 |
| 147 | 6 | 0 | -6.187172 | 3.171471  | 5.636993  |
| 148 | 1 | 0 | -6.402780 | 2.775833  | 3.566979  |
| 149 | 1 | 0 | -4.795025 | 3.400726  | 3.989849  |
| 150 | 6 | 0 | -5.153294 | 11.564006 | 4.267554  |
| 151 | 8 | 0 | -7.289526 | 10.708570 | 3.557306  |
| 152 | 1 | 0 | -6.767820 | 8.763599  | -1.844418 |
| 153 | 1 | 0 | -6.378902 | 7.422282  | -0.691533 |
| 154 | 1 | 0 | -7.867900 | 8.429246  | -0.440494 |
| 155 | 1 | 0 | -6.476131 | 11.051219 | -1.279602 |
| 156 | 1 | 0 | -7.513776 | 10.984031 | 0.206570  |
| 157 | 1 | 0 | -5.805124 | 11.583374 | 0.313916  |
| 158 | 6 | 0 | -6.317174 | 1.338871  | -0.169441 |
| 159 | 6 | 0 | -6.528272 | 3.129463  | -1.902705 |
| 160 | 1 | 0 | -7.916929 | 2.827090  | -0.285662 |
| 161 | 8 | 0 | -7.355248 | 3.091026  | 6.040196  |
| 162 | 7 | 0 | -5.118119 | 2.971099  | 6.446868  |
| 163 | 1 | 0 | -5.520656 | 12.594905 | 4.240710  |
| 164 | 1 | 0 | -5.238160 | 11.211324 | 5.301450  |
| 165 | 1 | 0 | -4.107553 | 11.529260 | 3.951911  |
| 166 | 8 | 0 | -5.099428 | 1.097054  | -0.214346 |
| 167 | 7 | 0 | -7.262033 | 0.426972  | 0.147386  |
| 168 | 6 | 0 | -6.987050 | 4.542844  | -2.237557 |
| 169 | 6 | 0 | -7.210449 | 2.124572  | -2.811624 |
| 170 | 1 | 0 | -5.412449 | 3.062783  | -2.060615 |

|     |   |   |           |           |           |
|-----|---|---|-----------|-----------|-----------|
| 171 | 1 | 0 | -5.301928 | 2.781785  | 7.423123  |
| 172 | 1 | 0 | -4.156552 | 3.064112  | 6.118627  |
| 173 | 1 | 0 | -8.243905 | 0.716820  | 0.176658  |
| 174 | 6 | 0 | -6.922505 | -0.952538 | 0.528725  |
| 175 | 6 | 0 | -6.413464 | 5.034780  | -3.542658 |
| 176 | 1 | 0 | -8.109152 | 4.565926  | -2.282629 |
| 177 | 1 | 0 | -6.675567 | 5.252089  | -1.425273 |
| 178 | 1 | 0 | -7.071607 | 2.415256  | -3.880927 |
| 179 | 1 | 0 | -6.777017 | 1.103892  | -2.669259 |
| 180 | 1 | 0 | -8.306307 | 2.079130  | -2.595997 |
| 181 | 6 | 0 | -7.623864 | -1.928819 | -0.450309 |
| 182 | 6 | 0 | -7.354628 | -1.319563 | 1.947274  |
| 183 | 1 | 0 | -5.834990 | -1.050647 | 0.448515  |
| 184 | 1 | 0 | -6.683603 | 6.107904  | -3.696737 |
| 185 | 1 | 0 | -5.299251 | 4.948408  | -3.542142 |
| 186 | 1 | 0 | -6.810147 | 4.448649  | -4.406278 |
| 187 | 8 | 0 | -8.854407 | -1.907973 | -0.590936 |
| 188 | 7 | 0 | -6.795891 | -2.783624 | -1.096088 |
| 189 | 6 | 0 | -6.969178 | -2.756154 | 2.244922  |
| 190 | 6 | 0 | -6.728444 | -0.394931 | 2.970501  |
| 191 | 1 | 0 | -8.478618 | -1.229096 | 2.015329  |
| 192 | 1 | 0 | -5.788007 | -2.723392 | -0.931245 |
| 193 | 6 | 0 | -7.296388 | -3.852550 | -1.967566 |
| 194 | 1 | 0 | -7.183542 | -2.995236 | 3.314699  |
| 195 | 1 | 0 | -7.553865 | -3.461059 | 1.605146  |
| 196 | 1 | 0 | -5.880211 | -2.919956 | 2.054736  |
| 197 | 1 | 0 | -6.980208 | -0.741496 | 4.002286  |
| 198 | 1 | 0 | -5.616594 | -0.383306 | 2.860901  |
| 199 | 1 | 0 | -7.109057 | 0.648369  | 2.853521  |
| 200 | 6 | 0 | -6.902888 | -5.215806 | -1.344648 |
| 201 | 6 | 0 | -6.724385 | -3.835605 | -3.376398 |
| 202 | 1 | 0 | -8.386080 | -3.751645 | -2.011536 |
| 203 | 8 | 0 | -5.715507 | -5.470949 | -1.084862 |
| 204 | 7 | 0 | -7.926675 | -6.074335 | -1.138615 |
| 205 | 6 | 0 | -7.275961 | -2.738661 | -4.214565 |
| 206 | 1 | 0 | -5.601678 | -3.759651 | -3.334258 |
| 207 | 1 | 0 | -6.968976 | -4.825082 | -3.853504 |
| 208 | 1 | 0 | -8.885594 | -5.758740 | -1.303376 |
| 209 | 6 | 0 | -7.694838 | -7.412040 | -0.579951 |
| 210 | 6 | 0 | -6.643918 | -1.488746 | -4.255036 |
| 211 | 6 | 0 | -8.417079 | -2.956131 | -4.994385 |
| 212 | 6 | 0 | -8.020689 | -8.503416 | -1.630169 |
| 213 | 6 | 0 | -8.446520 | -7.692101 | 0.704819  |

|     |   |   |            |            |           |
|-----|---|---|------------|------------|-----------|
| 214 | 1 | 0 | -6.623716  | -7.461446  | -0.347961 |
| 215 | 6 | 0 | -7.129002  | -0.472142  | -5.069768 |
| 216 | 1 | 0 | -5.754535  | -1.307506  | -3.630187 |
| 217 | 6 | 0 | -8.919904  | -1.950691  | -5.815974 |
| 218 | 1 | 0 | -8.925566  | -3.932186  | -4.961314 |
| 219 | 8 | 0 | -9.051796  | -8.472440  | -2.320414 |
| 220 | 7 | 0 | -7.101894  | -9.488792  | -1.709526 |
| 221 | 6 | 0 | -9.954183  | -7.626212  | 0.594556  |
| 222 | 1 | 0 | -8.142172  | -8.714809  | 1.058553  |
| 223 | 1 | 0 | -8.104359  | -6.956512  | 1.484364  |
| 224 | 6 | 0 | -8.270057  | -0.709459  | -5.853981 |
| 225 | 1 | 0 | -6.641491  | 0.512880   | -5.102217 |
| 226 | 1 | 0 | -9.818813  | -2.126623  | -6.423420 |
| 227 | 1 | 0 | -6.223551  | -9.388861  | -1.198203 |
| 228 | 6 | 0 | -7.264042  | -10.614094 | -2.618524 |
| 229 | 6 | 0 | -10.588017 | -7.971357  | 1.926526  |
| 230 | 1 | 0 | -10.277159 | -6.598384  | 0.275016  |
| 231 | 1 | 0 | -10.307566 | -8.339705  | -0.197926 |
| 232 | 8 | 0 | -8.696164  | 0.328681   | -6.650616 |
| 233 | 1 | 0 | -6.574472  | -11.409750 | -2.322880 |
| 234 | 1 | 0 | -8.290271  | -10.990944 | -2.572170 |
| 235 | 1 | 0 | -7.052802  | -10.330640 | -3.658188 |
| 236 | 6 | 0 | -12.110875 | -7.967503  | 1.812109  |
| 237 | 1 | 0 | -10.238388 | -8.982115  | 2.264488  |
| 238 | 1 | 0 | -10.257306 | -7.228869  | 2.700012  |
| 239 | 1 | 0 | -9.523608  | 0.058501   | -7.075155 |
| 240 | 7 | 0 | -12.781545 | -8.253921  | 3.058556  |
| 241 | 1 | 0 | -12.426122 | -6.975263  | 1.368838  |
| 242 | 1 | 0 | -12.419072 | -8.769316  | 1.080165  |
| 243 | 1 | 0 | -12.416175 | -7.693554  | 3.802587  |
| 244 | 1 | 0 | -13.763181 | -8.082252  | 2.970862  |
| 245 | 1 | 0 | 0.749953   | 3.344364   | 5.504787  |
| 246 | 7 | 0 | -0.203164  | 3.237784   | 5.854682  |
| 247 | 6 | 0 | -1.288786  | 3.301491   | 5.047141  |
| 248 | 1 | 0 | -0.366005  | 3.154633   | 6.849431  |
| 249 | 6 | 0 | -1.007605  | 3.498258   | 3.561449  |
| 250 | 8 | 0 | -2.447646  | 3.212674   | 5.478653  |
| 251 | 6 | 0 | -1.533601  | 4.866472   | 3.085399  |
| 252 | 1 | 0 | -1.528215  | 2.690882   | 3.031113  |
| 253 | 1 | 0 | 0.064236   | 3.406150   | 3.356314  |
| 254 | 6 | 0 | -1.315085  | 5.104021   | 1.578080  |
| 255 | 1 | 0 | -1.017539  | 5.668175   | 3.627686  |
| 256 | 1 | 0 | -2.601014  | 4.948433   | 3.315348  |



|     |   |   |           |           |           |
|-----|---|---|-----------|-----------|-----------|
| 257 | 7 | 0 | -1.722579 | 6.458035  | 1.210515  |
| 258 | 6 | 0 | -2.139338 | 4.105218  | 0.741510  |
| 259 | 1 | 0 | -0.256219 | 5.006356  | 1.330795  |
| 260 | 6 | 0 | -0.864389 | 7.358661  | 0.686976  |
| 261 | 1 | 0 | -2.700438 | 6.727485  | 1.365584  |
| 262 | 8 | 0 | -3.375764 | 4.085074  | 0.829331  |
| 263 | 7 | 0 | -1.420455 | 3.287188  | -0.059720 |
| 264 | 6 | 0 | -1.466783 | 8.751288  | 0.379438  |
| 265 | 8 | 0 | 0.338890  | 7.133128  | 0.472131  |
| 266 | 1 | 0 | -0.400563 | 3.367277  | -0.064917 |
| 267 | 6 | 0 | -2.050106 | 2.281175  | -0.931573 |
| 268 | 7 | 0 | -0.720681 | 9.743378  | 1.166515  |
| 269 | 6 | 0 | -1.409253 | 8.980198  | -1.128896 |
| 270 | 1 | 0 | -2.509802 | 8.796751  | 0.711910  |
| 271 | 6 | 0 | -1.540163 | 0.897252  | -0.456555 |
| 272 | 6 | 0 | -1.721116 | 2.444614  | -2.413255 |
| 273 | 1 | 0 | -3.133579 | 2.358597  | -0.791546 |
| 274 | 1 | 0 | 0.280819  | 9.849589  | 0.991467  |
| 275 | 6 | 0 | -1.323639 | 10.553034 | 2.074071  |
| 276 | 6 | 0 | -2.231394 | 7.921139  | -1.838061 |
| 277 | 6 | 0 | -1.920772 | 10.357974 | -1.496102 |
| 278 | 1 | 0 | -0.335361 | 8.888194  | -1.465877 |
| 279 | 8 | 0 | -0.321246 | 0.655950  | -0.440065 |
| 280 | 7 | 0 | -2.491717 | 0.030341  | -0.048357 |
| 281 | 6 | 0 | -2.217808 | 3.782805  | -2.945092 |
| 282 | 6 | 0 | -2.349085 | 1.301418  | -3.188020 |
| 283 | 1 | 0 | -0.600610 | 2.394997  | -2.541060 |
| 284 | 6 | 0 | -0.394028 | 11.507718 | 2.809013  |
| 285 | 8 | 0 | -2.540538 | 10.530663 | 2.320633  |
| 286 | 1 | 0 | -2.231225 | 8.111884  | -2.938255 |
| 287 | 1 | 0 | -1.805864 | 6.903969  | -1.657328 |
| 288 | 1 | 0 | -3.288128 | 7.935676  | -1.474596 |
| 289 | 1 | 0 | -1.974006 | 10.461093 | -2.607144 |
| 290 | 1 | 0 | -2.943140 | 10.520344 | -1.075406 |
| 291 | 1 | 0 | -1.243401 | 11.153543 | -1.103939 |
| 292 | 1 | 0 | -3.475486 | 0.319482  | -0.072041 |
| 293 | 6 | 0 | -2.151772 | -1.282792 | 0.519492  |
| 294 | 6 | 0 | -1.614784 | 4.122274  | -4.284924 |
| 295 | 1 | 0 | -3.337627 | 3.753705  | -3.028360 |
| 296 | 1 | 0 | -1.962691 | 4.603223  | -2.222797 |
| 297 | 1 | 0 | -2.205336 | 1.452628  | -4.285127 |
| 298 | 1 | 0 | -1.876774 | 0.327579  | -2.907212 |
| 299 | 1 | 0 | -3.445055 | 1.239364  | -2.978522 |

|     |   |   |           |           |           |
|-----|---|---|-----------|-----------|-----------|
| 300 | 1 | 0 | -0.787017 | 12.524047 | 2.702766  |
| 301 | 1 | 0 | -0.414572 | 11.256932 | 3.875304  |
| 302 | 1 | 0 | 0.633651  | 11.463412 | 2.439664  |
| 303 | 6 | 0 | -2.826635 | -2.385756 | -0.334849 |
| 304 | 6 | 0 | -2.608587 | -1.465245 | 1.966021  |
| 305 | 1 | 0 | -1.062435 | -1.380632 | 0.473047  |
| 306 | 1 | 0 | -1.928387 | 5.148683  | -4.595120 |
| 307 | 1 | 0 | -0.498720 | 4.094671  | -4.234198 |
| 308 | 1 | 0 | -1.947487 | 3.403775  | -5.072292 |
| 309 | 8 | 0 | -4.055022 | -2.398579 | -0.492182 |
| 310 | 7 | 0 | -1.980686 | -3.301763 | -0.859722 |
| 311 | 6 | 0 | -2.124964 | -2.804196 | 2.489843  |
| 312 | 6 | 0 | -2.095152 | -0.351019 | 2.854777  |
| 313 | 1 | 0 | -3.737891 | -1.455233 | 1.989129  |
| 314 | 1 | 0 | -0.979267 | -3.218187 | -0.667212 |
| 315 | 6 | 0 | -2.449043 | -4.504921 | -1.563950 |
| 316 | 1 | 0 | -2.391037 | -2.908022 | 3.569688  |
| 317 | 1 | 0 | -2.600650 | -3.645005 | 1.929267  |
| 318 | 1 | 0 | -1.015243 | -2.890488 | 2.386406  |
| 319 | 1 | 0 | -2.323426 | -0.579607 | 3.924230  |
| 320 | 1 | 0 | -0.989225 | -0.238334 | 2.743715  |
| 321 | 1 | 0 | -2.580677 | 0.621402  | 2.598211  |
| 322 | 6 | 0 | -2.093751 | -5.719382 | -0.669096 |
| 323 | 6 | 0 | -1.788351 | -4.735585 | -2.911652 |
| 324 | 1 | 0 | -3.534099 | -4.416315 | -1.687659 |
| 325 | 8 | 0 | -0.910929 | -5.926484 | -0.349153 |
| 326 | 7 | 0 | -3.132077 | -6.489625 | -0.272375 |
| 327 | 6 | 0 | -2.191532 | -3.745778 | -3.944760 |
| 328 | 1 | 0 | -0.668078 | -4.724165 | -2.792980 |
| 329 | 1 | 0 | -2.073167 | -5.769774 | -3.251427 |
| 330 | 1 | 0 | -4.087501 | -6.215998 | -0.520659 |
| 331 | 6 | 0 | -2.917222 | -7.581038 | 0.686502  |
| 332 | 6 | 0 | -1.529703 | -2.514255 | -4.042545 |
| 333 | 6 | 0 | -3.210813 | -4.051106 | -4.853193 |
| 334 | 6 | 0 | -3.495053 | -8.912568 | 0.159593  |
| 335 | 6 | 0 | -3.440571 | -7.304317 | 2.081485  |
| 336 | 1 | 0 | -1.830155 | -7.689526 | 0.775481  |
| 337 | 6 | 0 | -1.865620 | -1.602666 | -5.036752 |
| 338 | 1 | 0 | -0.735729 | -2.263699 | -3.320425 |
| 339 | 6 | 0 | -3.558436 | -3.154228 | -5.860063 |
| 340 | 1 | 0 | -3.745409 | -5.010374 | -4.774976 |
| 341 | 8 | 0 | -4.635971 | -9.005956 | -0.319099 |
| 342 | 7 | 0 | -2.655838 | -9.962437 | 0.293069  |

|     |   |   |           |            |           |
|-----|---|---|-----------|------------|-----------|
| 343 | 6 | 0 | -4.912605 | -6.968269  | 2.177346  |
| 344 | 1 | 0 | -3.223226 | -8.208164  | 2.713745  |
| 345 | 1 | 0 | -2.844068 | -6.449920  | 2.509657  |
| 346 | 6 | 0 | -2.881307 | -1.930439  | -5.950175 |
| 347 | 1 | 0 | -1.357091 | -0.630838  | -5.113974 |
| 348 | 1 | 0 | -4.360325 | -3.398566  | -6.570630 |
| 349 | 1 | 0 | -1.704623 | -9.793046  | 0.622632  |
| 350 | 6 | 0 | -3.042231 | -11.309899 | -0.098752 |
| 351 | 6 | 0 | -5.277361 | -6.685623  | 3.621156  |
| 352 | 1 | 0 | -5.152164 | -6.073290  | 1.542668  |
| 353 | 1 | 0 | -5.525124 | -7.821472  | 1.779509  |
| 354 | 8 | 0 | -3.155352 | -0.999113  | -6.925711 |
| 355 | 1 | 0 | -2.349058 | -12.023362 | 0.355479  |
| 356 | 1 | 0 | -4.057817 | -11.526396 | 0.246923  |
| 357 | 1 | 0 | -3.017787 | -11.438314 | -1.188936 |
| 358 | 6 | 0 | -6.745974 | -6.285940  | 3.742379  |
| 359 | 1 | 0 | -5.079267 | -7.594881  | 4.247534  |
| 360 | 1 | 0 | -4.621453 | -5.863688  | 4.016432  |
| 361 | 1 | 0 | -3.936838 | -1.298876  | -7.412786 |
| 362 | 7 | 0 | -7.138658 | -5.960893  | 5.093308  |
| 363 | 1 | 0 | -6.939285 | -5.434334  | 3.019593  |
| 364 | 1 | 0 | -7.383873 | -7.156308  | 3.412212  |
| 365 | 1 | 0 | -6.544206 | -5.256754  | 5.482457  |
| 366 | 1 | 0 | -8.085354 | -5.638232  | 5.111512  |
| 367 | 1 | 0 | 5.644357  | 3.763215   | 4.808575  |
| 368 | 7 | 0 | 4.703456  | 3.682029   | 5.194617  |
| 369 | 6 | 0 | 3.601344  | 3.584394   | 4.413346  |
| 370 | 1 | 0 | 4.565318  | 3.726337   | 6.195562  |
| 371 | 6 | 0 | 3.845294  | 3.583351   | 2.908716  |
| 372 | 8 | 0 | 2.455983  | 3.508752   | 4.882020  |
| 373 | 6 | 0 | 3.275600  | 4.862383   | 2.264303  |
| 374 | 1 | 0 | 3.333115  | 2.701257   | 2.504876  |
| 375 | 1 | 0 | 4.914338  | 3.487260   | 2.690146  |
| 376 | 6 | 0 | 3.446016  | 4.888798   | 0.732683  |
| 377 | 1 | 0 | 3.788600  | 5.741846   | 2.672216  |
| 378 | 1 | 0 | 2.213388  | 4.955619   | 2.513576  |
| 379 | 7 | 0 | 2.998115  | 6.168623   | 0.191034  |
| 380 | 6 | 0 | 2.625183  | 3.765586   | 0.071407  |
| 381 | 1 | 0 | 4.499890  | 4.778212   | 0.470235  |
| 382 | 1 | 0 | 2.015750  | 6.435020   | 0.321227  |
| 383 | 6 | 0 | 3.826628  | 7.003659   | -0.471003 |
| 384 | 8 | 0 | 1.391536  | 3.739442   | 0.192479  |
| 385 | 7 | 0 | 3.342469  | 2.850682   | -0.616427 |

|     |   |   |          |           |           |
|-----|---|---|----------|-----------|-----------|
| 386 | 6 | 0 | 3.188602 | 8.332128  | -0.945159 |
| 387 | 8 | 0 | 5.029366 | 6.769263  | -0.682204 |
| 388 | 1 | 0 | 4.359938 | 2.945036  | -0.659371 |
| 389 | 6 | 0 | 2.716615 | 1.712119  | -1.308112 |
| 390 | 7 | 0 | 3.929423 | 9.431308  | -0.310312 |
| 391 | 6 | 0 | 3.211598 | 8.362682  | -2.471074 |
| 392 | 1 | 0 | 2.151296 | 8.400433  | -0.598687 |
| 393 | 6 | 0 | 3.236814 | 0.426996  | -0.614350 |
| 394 | 6 | 0 | 3.034960 | 1.634685  | -2.798849 |
| 395 | 1 | 0 | 1.633523 | 1.803576  | -1.174306 |
| 396 | 6 | 0 | 3.334329 | 10.333225 | 0.511107  |
| 397 | 1 | 0 | 4.924989 | 9.528165  | -0.519660 |
| 398 | 6 | 0 | 2.407287 | 7.198046  | -3.016501 |
| 399 | 6 | 0 | 2.652869 | 9.666431  | -3.002792 |
| 400 | 1 | 0 | 4.281012 | 8.255606  | -2.817471 |
| 401 | 8 | 0 | 4.456137 | 0.193024  | -0.560037 |
| 402 | 7 | 0 | 2.286299 | -0.358653 | -0.064727 |
| 403 | 6 | 0 | 2.533993 | 2.870524  | -3.535192 |
| 404 | 6 | 0 | 2.401519 | 0.381587  | -3.373126 |
| 405 | 1 | 0 | 4.154461 | 1.564341  | -2.925606 |
| 406 | 6 | 0 | 4.262318 | 11.388611 | 1.094706  |
| 407 | 8 | 0 | 2.126029 | 10.318106 | 0.796257  |
| 408 | 1 | 0 | 2.373908 | 7.246918  | -4.131510 |
| 409 | 1 | 0 | 2.870466 | 6.225223  | -2.720589 |
| 410 | 1 | 0 | 1.360136 | 7.227815  | -2.627265 |
| 411 | 1 | 0 | 2.580280 | 9.623800  | -4.116700 |
| 412 | 1 | 0 | 1.632224 | 9.852383  | -2.587730 |
| 413 | 1 | 0 | 3.311069 | 10.524939 | -2.728490 |
| 414 | 1 | 0 | 1.301696 | -0.083603 | -0.147201 |
| 415 | 6 | 0 | 2.619057 | -1.568940 | 0.700139  |
| 416 | 6 | 0 | 3.103501 | 2.975798  | -4.927481 |
| 417 | 1 | 0 | 1.412261 | 2.840470  | -3.585359 |
| 418 | 1 | 0 | 2.813724 | 3.797072  | -2.966723 |
| 419 | 1 | 0 | 2.551776 | 0.342700  | -4.479070 |
| 420 | 1 | 0 | 2.866049 | -0.533914 | -2.929673 |
| 421 | 1 | 0 | 1.304303 | 0.362898  | -3.161625 |
| 422 | 1 | 0 | 3.849732 | 12.376792 | 0.866866  |
| 423 | 1 | 0 | 4.268988 | 11.278259 | 2.184621  |
| 424 | 1 | 0 | 5.282443 | 11.312115 | 0.710226  |
| 425 | 6 | 0 | 1.957238 | -2.787770 | 0.010024  |
| 426 | 6 | 0 | 2.136854 | -1.526090 | 2.149026  |
| 427 | 1 | 0 | 3.709240 | -1.670412 | 0.687806  |
| 428 | 1 | 0 | 2.787142 | 3.939084  | -5.396657 |

|     |   |   |           |            |           |
|-----|---|---|-----------|------------|-----------|
| 429 | 1 | 0 | 4.220300  | 2.946558   | -4.901082 |
| 430 | 1 | 0 | 2.746246  | 2.139545   | -5.575510 |
| 431 | 8 | 0 | 0.734578  | -2.815127  | -0.186439 |
| 432 | 7 | 0 | 2.807327  | -3.782486  | -0.330642 |
| 433 | 6 | 0 | 2.472437  | -2.830248  | 2.846624  |
| 434 | 6 | 0 | 2.760829  | -0.366446  | 2.897598  |
| 435 | 1 | 0 | 1.014348  | -1.398681  | 2.151343  |
| 436 | 1 | 0 | 3.805130  | -3.673102  | -0.133657 |
| 437 | 6 | 0 | 2.346079  | -5.080490  | -0.847422 |
| 438 | 1 | 0 | 2.232787  | -2.750755  | 3.934814  |
| 439 | 1 | 0 | 1.875940  | -3.672250  | 2.418076  |
| 440 | 1 | 0 | 3.558234  | -3.070456  | 2.737889  |
| 441 | 1 | 0 | 2.460862  | -0.400233  | 3.973151  |
| 442 | 1 | 0 | 3.875422  | -0.415643  | 2.837931  |
| 443 | 1 | 0 | 2.423814  | 0.610250   | 2.474221  |
| 444 | 6 | 0 | 2.664116  | -6.127350  | 0.248872  |
| 445 | 6 | 0 | 3.052662  | -5.532308  | -2.113173 |
| 446 | 1 | 0 | 1.267033  | -5.006833  | -1.021160 |
| 447 | 8 | 0 | 3.841840  | -6.296970  | 0.607605  |
| 448 | 7 | 0 | 1.609261  | -6.788417  | 0.777163  |
| 449 | 6 | 0 | 2.777484  | -4.668243  | -3.290785 |
| 450 | 1 | 0 | 4.163505  | -5.572896  | -1.929352 |
| 451 | 1 | 0 | 2.713802  | -6.583349  | -2.327688 |
| 452 | 1 | 0 | 0.660542  | -6.562434  | 0.463251  |
| 453 | 6 | 0 | 1.814514  | -7.713632  | 1.898940  |
| 454 | 6 | 0 | 3.510549  | -3.490199  | -3.489495 |
| 455 | 6 | 0 | 1.812988  | -5.043321  | -4.232119 |
| 456 | 6 | 0 | 1.171631  | -9.089727  | 1.618133  |
| 457 | 6 | 0 | 1.364016  | -7.192495  | 3.248407  |
| 458 | 1 | 0 | 2.899249  | -7.852250  | 1.969443  |
| 459 | 6 | 0 | 3.296515  | -2.699193  | -4.612278 |
| 460 | 1 | 0 | 4.265133  | -3.185477  | -2.746013 |
| 461 | 6 | 0 | 1.588296  | -4.268645  | -5.367269 |
| 462 | 1 | 0 | 1.223805  | -5.960516  | -4.077916 |
| 463 | 8 | 0 | 0.006937  | -9.222778  | 1.210317  |
| 464 | 7 | 0 | 1.989820  | -10.132512 | 1.879885  |
| 465 | 6 | 0 | -0.090306 | -6.790269  | 3.353086  |
| 466 | 1 | 0 | 1.584162  | -7.991086  | 4.009086  |
| 467 | 1 | 0 | 2.005229  | -6.303347  | 3.508135  |
| 468 | 6 | 0 | 2.333712  | -3.096719  | -5.554869 |
| 469 | 1 | 0 | 3.861253  | -1.768826  | -4.769129 |
| 470 | 1 | 0 | 0.828636  | -4.567066  | -6.103166 |
| 471 | 1 | 0 | 2.955046  | -9.941508  | 2.150228  |

|     |   |   |           |            |           |
|-----|---|---|-----------|------------|-----------|
| 472 | 6 | 0 | 1.550930  | -11.511029 | 1.718524  |
| 473 | 6 | 0 | -0.395528 | -6.357266  | 4.773553  |
| 474 | 1 | 0 | -0.313065 | -5.950839  | 2.641893  |
| 475 | 1 | 0 | -0.747546 | -7.651995  | 3.057099  |
| 476 | 8 | 0 | 2.181187  | -2.286674  | -6.657072 |
| 477 | 1 | 0 | 2.316218  | -12.174653 | 2.129773  |
| 478 | 1 | 0 | 0.608577  | -11.680258 | 2.250750  |
| 479 | 1 | 0 | 1.395098  | -11.761424 | 0.661576  |
| 480 | 6 | 0 | -1.851458 | -5.919636  | 4.912117  |
| 481 | 1 | 0 | -0.186317 | -7.203703  | 5.479707  |
| 482 | 1 | 0 | 0.286549  | -5.511818  | 5.059860  |
| 483 | 1 | 0 | 1.419414  | -2.609040  | -7.160736 |
| 484 | 7 | 0 | -2.197169 | -5.515612  | 6.253647  |
| 485 | 1 | 0 | -2.046554 | -5.103368  | 4.149463  |
| 486 | 1 | 0 | -2.519150 | -6.789960  | 4.642464  |
| 487 | 1 | 0 | -1.612139 | -4.768983  | 6.569978  |
| 488 | 1 | 0 | -3.154332 | -5.228306  | 6.294992  |
| 489 | 1 | 0 | 15.445748 | 3.786034   | 3.066494  |
| 490 | 7 | 0 | 14.532436 | 3.887166   | 3.483392  |
| 491 | 6 | 0 | 13.387632 | 3.754835   | 2.754208  |
| 492 | 1 | 0 | 14.461164 | 4.128107   | 4.463312  |
| 493 | 6 | 0 | 13.562489 | 3.413283   | 1.278846  |
| 494 | 8 | 0 | 12.273711 | 3.901564   | 3.263150  |
| 495 | 6 | 0 | 12.917836 | 4.493344   | 0.389218  |
| 496 | 1 | 0 | 13.070642 | 2.443680   | 1.126444  |
| 497 | 1 | 0 | 14.621956 | 3.284648   | 1.025203  |
| 498 | 6 | 0 | 12.956245 | 4.163853   | -1.120478 |
| 499 | 1 | 0 | 13.437944 | 5.447965   | 0.530748  |
| 500 | 1 | 0 | 11.876517 | 4.636775   | 0.694265  |
| 501 | 7 | 0 | 12.400918 | 5.260715   | -1.900738 |
| 502 | 6 | 0 | 12.127928 | 2.903221   | -1.411970 |
| 503 | 1 | 0 | 13.995137 | 4.038370   | -1.442586 |
| 504 | 6 | 0 | 13.197828 | 6.139977   | -2.560589 |
| 505 | 1 | 0 | 11.389397 | 5.424241   | -1.874650 |
| 506 | 8 | 0 | 10.896163 | 2.935838   | -1.293436 |
| 507 | 7 | 0 | 12.819647 | 1.798798   | -1.772079 |
| 508 | 6 | 0 | 12.440311 | 7.239790   | -3.344605 |
| 509 | 8 | 0 | 14.433729 | 6.100495   | -2.551802 |
| 510 | 1 | 0 | 13.832461 | 1.819999   | -1.781446 |
| 511 | 6 | 0 | 12.188395 | 0.482303   | -1.977383 |
| 512 | 7 | 0 | 13.175089 | 8.491597   | -3.120595 |
| 513 | 6 | 0 | 12.330026 | 6.825356   | -4.810427 |
| 514 | 1 | 0 | 11.430771 | 7.372959   | -2.941723 |

|     |   |   |           |           |           |
|-----|---|---|-----------|-----------|-----------|
| 515 | 6 | 0 | 12.798725 | -0.464814 | -0.907277 |
| 516 | 6 | 0 | 12.418920 | -0.102194 | -3.367864 |
| 517 | 1 | 0 | 11.112878 | 0.607352  | -1.813981 |
| 518 | 6 | 0 | 12.588034 | 9.630213  | -2.669663 |
| 519 | 1 | 0 | 14.184755 | 8.426651  | -3.170964 |
| 520 | 6 | 0 | 11.481677 | 5.572174  | -4.923776 |
| 521 | 6 | 0 | 11.723583 | 7.934429  | -5.646870 |
| 522 | 1 | 0 | 13.361847 | 6.601478  | -5.205225 |
| 523 | 8 | 0 | 14.012673 | -0.445792 | -0.675121 |
| 524 | 7 | 0 | 11.901855 | -1.268204 | -0.274320 |
| 525 | 6 | 0 | 11.812827 | 0.785266  | -4.449461 |
| 526 | 6 | 0 | 11.812990 | -1.492496 | -3.430435 |
| 527 | 1 | 0 | 13.528872 | -0.183811 | -3.548815 |
| 528 | 6 | 0 | 13.528983 | 10.795730 | -2.400664 |
| 529 | 8 | 0 | 11.367946 | 9.740150  | -2.483547 |
| 530 | 1 | 0 | 11.204020 | 5.393447  | -5.990649 |
| 531 | 1 | 0 | 12.042994 | 4.679038  | -4.558231 |
| 532 | 1 | 0 | 10.543520 | 5.675502  | -4.322505 |
| 533 | 1 | 0 | 11.538826 | 7.570995  | -6.686920 |
| 534 | 1 | 0 | 10.751838 | 8.268385  | -5.207992 |
| 535 | 1 | 0 | 12.408479 | 8.813703  | -5.703518 |
| 536 | 1 | 0 | 10.901395 | -1.113068 | -0.425659 |
| 537 | 6 | 0 | 12.320874 | -2.175455 | 0.798256  |
| 538 | 6 | 0 | 12.417096 | 0.515254  | -5.804518 |
| 539 | 1 | 0 | 10.703594 | 0.612715  | -4.488692 |
| 540 | 1 | 0 | 11.965461 | 1.868302  | -4.200290 |
| 541 | 1 | 0 | 11.767045 | -1.846805 | -4.488552 |
| 542 | 1 | 0 | 12.431243 | -2.216702 | -2.847318 |
| 543 | 1 | 0 | 10.775380 | -1.488636 | -3.012137 |
| 544 | 1 | 0 | 13.232641 | 11.636605 | -3.035776 |
| 545 | 1 | 0 | 13.407562 | 11.109484 | -1.359116 |
| 546 | 1 | 0 | 14.581063 | 10.558986 | -2.586499 |
| 547 | 6 | 0 | 11.612249 | -3.536792 | 0.589448  |
| 548 | 6 | 0 | 12.000417 | -1.688036 | 2.214236  |
| 549 | 1 | 0 | 13.409174 | -2.277046 | 0.705769  |
| 550 | 1 | 0 | 11.945563 | 1.177118  | -6.571035 |
| 551 | 1 | 0 | 13.516036 | 0.715038  | -5.794611 |
| 552 | 1 | 0 | 12.257533 | -0.546098 | -6.113028 |
| 553 | 8 | 0 | 10.414641 | -3.586179 | 0.283734  |
| 554 | 7 | 0 | 12.388122 | -4.632743 | 0.779890  |
| 555 | 6 | 0 | 12.753599 | -2.515262 | 3.238439  |
| 556 | 6 | 0 | 12.352173 | -0.222880 | 2.385136  |
| 557 | 1 | 0 | 10.892284 | -1.809589 | 2.392605  |

|     |   |   |           |            |           |
|-----|---|---|-----------|------------|-----------|
| 558 | 1 | 0 | 13.318638 | -4.502146  | 1.163357  |
| 559 | 6 | 0 | 11.839870 | -5.990280  | 0.920909  |
| 560 | 1 | 0 | 12.569010 | -2.107656  | 4.262323  |
| 561 | 1 | 0 | 12.423430 | -3.582301  | 3.230360  |
| 562 | 1 | 0 | 13.852605 | -2.482115  | 3.041744  |
| 563 | 1 | 0 | 12.348732 | 0.049580   | 3.468316  |
| 564 | 1 | 0 | 13.366275 | -0.012206  | 1.964993  |
| 565 | 1 | 0 | 11.608380 | 0.426236   | 1.862462  |
| 566 | 6 | 0 | 12.069865 | -6.428139  | 2.393225  |
| 567 | 1 | 0 | 10.772886 | -5.953046  | 0.676129  |
| 568 | 8 | 0 | 13.117592 | -6.122182  | 2.971499  |
| 569 | 7 | 0 | 11.098406 | -7.207413  | 2.944808  |
| 570 | 6 | 0 | 12.499307 | -6.726326  | -1.397990 |
| 571 | 1 | 0 | 10.159908 | -7.204224  | 2.535058  |
| 572 | 6 | 0 | 11.285959 | -7.697230  | 4.313288  |
| 573 | 6 | 0 | 13.531229 | -5.982277  | -1.986268 |
| 574 | 6 | 0 | 10.472673 | -8.990363  | 4.535275  |
| 575 | 6 | 0 | 10.975881 | -6.699914  | 5.415793  |
| 576 | 1 | 0 | 12.356159 | -7.929503  | 4.405145  |
| 577 | 6 | 0 | 13.533946 | -5.720564  | -3.351088 |
| 578 | 1 | 0 | 14.350658 | -5.598262  | -1.359258 |
| 579 | 8 | 0 | 9.378009  | -9.200379  | 4.000291  |
| 580 | 7 | 0 | 11.042143 | -9.869780  | 5.398319  |
| 581 | 6 | 0 | 9.553974  | -6.183823  | 5.411134  |
| 582 | 1 | 0 | 11.192097 | -7.190327  | 6.402861  |
| 583 | 1 | 0 | 11.685096 | -5.832597  | 5.312752  |
| 584 | 6 | 0 | 12.483409 | -6.215534  | -4.142129 |
| 585 | 1 | 0 | 14.338860 | -5.137669  | -3.819861 |
| 586 | 1 | 0 | 11.962258 | -9.662143  | 5.761665  |
| 587 | 6 | 0 | 10.389384 | -11.111113 | 5.800041  |
| 588 | 6 | 0 | 9.317753  | -5.283844  | 6.605948  |
| 589 | 1 | 0 | 9.353973  | -5.615859  | 4.463722  |
| 590 | 1 | 0 | 8.835376  | -7.047669  | 5.429903  |
| 591 | 8 | 0 | 12.540861 | -5.931139  | -5.486853 |
| 592 | 1 | 0 | 10.899797 | -11.512677 | 6.679228  |
| 593 | 1 | 0 | 9.342620  | -10.918073 | 6.053530  |
| 594 | 1 | 0 | 10.421633 | -11.857970 | 4.997635  |
| 595 | 6 | 0 | 7.880435  | -4.766781  | 6.607763  |
| 596 | 1 | 0 | 9.517178  | -5.850126  | 7.553418  |
| 597 | 1 | 0 | 10.035543 | -4.422498  | 6.574465  |
| 598 | 1 | 0 | 11.738953 | -6.282501  | -5.900626 |
| 599 | 7 | 0 | 7.577760  | -3.939084  | 7.749863  |
| 600 | 1 | 0 | 7.697952  | -4.234423  | 5.623494  |



|     |   |   |           |           |           |
|-----|---|---|-----------|-----------|-----------|
| 601 | 1 | 0 | 7.177414  | -5.650741 | 6.636168  |
| 602 | 1 | 0 | 8.202780  | -3.160844 | 7.810050  |
| 603 | 1 | 0 | 6.635701  | -3.607036 | 7.699771  |
| 604 | 6 | 0 | 11.445630 | -6.963825 | -3.569417 |
| 605 | 1 | 0 | 10.626117 | -7.345137 | -4.194466 |
| 606 | 6 | 0 | 11.460793 | -7.211727 | -2.199391 |
| 607 | 1 | 0 | 10.646065 | -7.796733 | -1.745054 |
| 608 | 6 | 0 | 12.533014 | -7.031227 | 0.055999  |
| 609 | 1 | 0 | 12.021023 | -8.014717 | 0.247131  |
| 610 | 1 | 0 | 13.602654 | -7.140695 | 0.388118  |
| 611 | 1 | 0 | 10.526309 | 3.981342  | 3.953869  |
| 612 | 7 | 0 | 9.590226  | 3.994231  | 4.353770  |
| 613 | 6 | 0 | 8.471806  | 3.829395  | 3.605591  |
| 614 | 1 | 0 | 9.472109  | 4.160870  | 5.344390  |
| 615 | 6 | 0 | 8.688203  | 3.617033  | 2.111157  |
| 616 | 8 | 0 | 7.334450  | 3.852366  | 4.096083  |
| 617 | 6 | 0 | 8.066626  | 4.769419  | 1.299209  |
| 618 | 1 | 0 | 8.198222  | 2.669455  | 1.854374  |
| 619 | 1 | 0 | 9.755219  | 3.515972  | 1.884059  |
| 620 | 6 | 0 | 8.187556  | 4.574429  | -0.226601 |
| 621 | 1 | 0 | 8.566770  | 5.711569  | 1.554760  |
| 622 | 1 | 0 | 7.010678  | 4.875873  | 1.567947  |
| 623 | 7 | 0 | 7.693416  | 5.759674  | -0.924315 |
| 624 | 6 | 0 | 7.369800  | 3.350242  | -0.683974 |
| 625 | 1 | 0 | 9.234775  | 4.447762  | -0.506585 |
| 626 | 6 | 0 | 8.491144  | 6.530394  | -1.694137 |
| 627 | 1 | 0 | 6.711997  | 6.029922  | -0.793397 |
| 628 | 8 | 0 | 6.139007  | 3.342001  | -0.543284 |
| 629 | 7 | 0 | 8.083231  | 2.327971  | -1.208681 |
| 630 | 6 | 0 | 7.816315  | 7.782725  | -2.308027 |
| 631 | 8 | 0 | 9.694165  | 6.291723  | -1.906148 |
| 632 | 1 | 0 | 9.094649  | 2.431773  | -1.307148 |
| 633 | 6 | 0 | 7.453517  | 1.090157  | -1.707090 |
| 634 | 7 | 0 | 8.547126  | 8.972047  | -1.842564 |
| 635 | 6 | 0 | 7.792132  | 7.618880  | -3.825400 |
| 636 | 1 | 0 | 6.788491  | 7.877232  | -1.939847 |
| 637 | 6 | 0 | 8.011811  | -0.080032 | -0.853609 |
| 638 | 6 | 0 | 7.736316  | 0.797722  | -3.178279 |
| 639 | 1 | 0 | 6.373441  | 1.190809  | -1.556657 |
| 640 | 6 | 0 | 7.943083  | 9.967434  | -1.140021 |
| 641 | 1 | 0 | 9.522400  | 9.090340  | -2.118651 |
| 642 | 6 | 0 | 6.989467  | 6.385047  | -4.192190 |
| 643 | 6 | 0 | 7.198807  | 8.837828  | -4.501211 |

|     |   |   |          |           |           |
|-----|---|---|----------|-----------|-----------|
| 644 | 1 | 0 | 8.852007 | 7.479524  | -4.189149 |
| 645 | 8 | 0 | 9.232952 | -0.312206 | -0.832667 |
| 646 | 7 | 0 | 7.094050 | -0.772783 | -0.142127 |
| 647 | 6 | 0 | 7.219220 | 1.912345  | -4.078288 |
| 648 | 6 | 0 | 7.096584 | -0.525817 | -3.553107 |
| 649 | 1 | 0 | 8.853298 | 0.708246  | -3.316084 |
| 650 | 6 | 0 | 8.843012 | 11.128464 | -0.744912 |
| 651 | 8 | 0 | 6.746379 | 9.951157  | -0.814885 |
| 652 | 1 | 0 | 6.912508 | 6.296837  | -5.302642 |
| 653 | 1 | 0 | 7.482348 | 5.462288  | -3.799710 |
| 654 | 1 | 0 | 5.957619 | 6.447319  | -3.767471 |
| 655 | 1 | 0 | 7.086907 | 8.649413  | -5.596623 |
| 656 | 1 | 0 | 6.191492 | 9.069011  | -4.076453 |
| 657 | 1 | 0 | 7.856164 | 9.729651  | -4.366444 |
| 658 | 1 | 0 | 6.105623 | -0.508681 | -0.210822 |
| 659 | 6 | 0 | 7.480685 | -1.839991 | 0.793477  |
| 660 | 6 | 0 | 7.771998 | 1.813976  | -5.477986 |
| 661 | 1 | 0 | 6.097217 | 1.871015  | -4.109307 |
| 662 | 1 | 0 | 7.500090 | 2.913266  | -3.655457 |
| 663 | 1 | 0 | 7.257083 | -0.742571 | -4.637675 |
| 664 | 1 | 0 | 7.553225 | -1.363396 | -2.969093 |
| 665 | 1 | 0 | 5.997647 | -0.504556 | -3.351698 |
| 666 | 1 | 0 | 8.375882 | 12.057375 | -1.087542 |
| 667 | 1 | 0 | 8.891315 | 11.169925 | 0.348841  |
| 668 | 1 | 0 | 9.851115 | 11.044142 | -1.157021 |
| 669 | 6 | 0 | 6.778051 | -3.159759 | 0.381626  |
| 670 | 6 | 0 | 7.112546 | -1.541996 | 2.246289  |
| 671 | 1 | 0 | 8.567268 | -1.951442 | 0.716153  |
| 672 | 1 | 0 | 7.443355 | 2.695225  | -6.080740 |
| 673 | 1 | 0 | 8.889293 | 1.794314  | -5.461142 |
| 674 | 1 | 0 | 7.413616 | 0.888387  | -5.989667 |
| 675 | 8 | 0 | 5.546905 | -3.210745 | 0.257159  |
| 676 | 7 | 0 | 7.608943 | -4.213702 | 0.207621  |
| 677 | 6 | 0 | 7.564453 | -2.679990 | 3.141279  |
| 678 | 6 | 0 | 7.738109 | -0.244174 | 2.715122  |
| 679 | 1 | 0 | 5.989420 | -1.450994 | 2.320160  |
| 680 | 1 | 0 | 8.618765 | -4.064202 | 0.254944  |
| 681 | 6 | 0 | 7.132066 | -5.572222 | -0.098942 |
| 682 | 1 | 0 | 7.381765 | -2.417159 | 4.211624  |
| 683 | 1 | 0 | 7.000062 | -3.615786 | 2.910814  |
| 684 | 1 | 0 | 8.655836 | -2.878219 | 3.006726  |
| 685 | 1 | 0 | 7.550778 | -0.102498 | 3.807299  |
| 686 | 1 | 0 | 8.842124 | -0.255912 | 2.542646  |

|     |   |   |          |            |           |
|-----|---|---|----------|------------|-----------|
| 687 | 1 | 0 | 7.300725 | 0.628338   | 2.172769  |
| 688 | 6 | 0 | 7.438150 | -6.455876  | 1.139197  |
| 689 | 1 | 0 | 6.053246 | -5.512594  | -0.280453 |
| 690 | 8 | 0 | 8.618185 | -6.635683  | 1.489236  |
| 691 | 7 | 0 | 6.370062 | -6.971218  | 1.790123  |
| 692 | 6 | 0 | 7.749930 | -5.413621  | -2.533927 |
| 693 | 1 | 0 | 5.421995 | -6.765955  | 1.459389  |
| 694 | 6 | 0 | 6.566415 | -7.727017  | 3.033219  |
| 695 | 6 | 0 | 8.666794 | -4.378104  | -2.766495 |
| 696 | 6 | 0 | 5.866689 | -9.104651  | 2.974011  |
| 697 | 6 | 0 | 6.169556 | -6.994216  | 4.299243  |
| 698 | 1 | 0 | 7.645901 | -7.897437  | 3.102361  |
| 699 | 6 | 0 | 8.619650 | -3.637850  | -3.941698 |
| 700 | 1 | 0 | 9.433292 | -4.144134  | -2.007008 |
| 701 | 8 | 0 | 4.692601 | -9.255593  | 2.603250  |
| 702 | 7 | 0 | 6.648372 | -10.128096 | 3.385683  |
| 703 | 6 | 0 | 4.733525 | -6.524263  | 4.363405  |
| 704 | 1 | 0 | 6.374645 | -7.681332  | 5.165591  |
| 705 | 1 | 0 | 6.849733 | -6.104139  | 4.419024  |
| 706 | 6 | 0 | 7.639939 | -3.941641  | -4.902063 |
| 707 | 1 | 0 | 9.332973 | -2.821373  | -4.128745 |
| 708 | 1 | 0 | 7.621085 | -9.935408  | 3.619483  |
| 709 | 6 | 0 | 6.154742 | -11.496734 | 3.441615  |
| 710 | 6 | 0 | 4.473803 | -5.857147  | 5.699417  |
| 711 | 1 | 0 | 4.522644 | -5.802290  | 3.530093  |
| 712 | 1 | 0 | 4.041211 | -7.397768  | 4.220992  |
| 713 | 8 | 0 | 7.638130 | -3.170945  | -6.042631 |
| 714 | 1 | 0 | 6.895732 | -12.118836 | 3.950713  |
| 715 | 1 | 0 | 5.210159 | -11.542520 | 3.994255  |
| 716 | 1 | 0 | 5.982684 | -11.902666 | 2.436894  |
| 717 | 6 | 0 | 3.022465 | -5.395388  | 5.803569  |
| 718 | 1 | 0 | 4.703092 | -6.573674  | 6.531836  |
| 719 | 1 | 0 | 5.164507 | -4.979497  | 5.818737  |
| 720 | 1 | 0 | 6.887225 | -3.447674  | -6.587994 |
| 721 | 7 | 0 | 2.714454 | -4.771156  | 7.067507  |
| 722 | 1 | 0 | 2.805900 | -4.717646  | 4.920555  |
| 723 | 1 | 0 | 2.348354 | -6.296133  | 5.701224  |
| 724 | 1 | 0 | 3.306665 | -3.983639  | 7.237365  |
| 725 | 1 | 0 | 1.758186 | -4.478650  | 7.087353  |
| 726 | 6 | 0 | 6.723128 | -4.979528  | -4.687815 |
| 727 | 1 | 0 | 5.958310 | -5.210110  | -5.442560 |
| 728 | 6 | 0 | 6.783150 | -5.705816  | -3.500862 |
| 729 | 1 | 0 | 6.057558 | -6.514932  | -3.324691 |

|     |   |   |          |           |           |
|-----|---|---|----------|-----------|-----------|
| 730 | 6 | 0 | 7.833446 | -6.213570 | -1.284122 |
| 731 | 1 | 0 | 7.366459 | -7.223772 | -1.443613 |
| 732 | 1 | 0 | 8.917819 | -6.383013 | -1.025822 |

P PI (Ac-VQIVYK-NHMe)<sub>7</sub>

|    |   |   |            |           |           |
|----|---|---|------------|-----------|-----------|
| 1  | 6 | 0 | -12.900882 | 10.571497 | 6.259747  |
| 2  | 6 | 0 | -13.682591 | 9.882819  | 5.148320  |
| 3  | 1 | 0 | -13.400687 | 11.515891 | 6.500283  |
| 4  | 1 | 0 | -12.943123 | 9.940973  | 7.154019  |
| 5  | 1 | 0 | -11.858557 | 10.762018 | 5.989426  |
| 6  | 8 | 0 | -14.871638 | 9.575242  | 5.278199  |
| 7  | 7 | 0 | -12.965065 | 9.642330  | 4.009350  |
| 8  | 1 | 0 | -11.969200 | 9.866343  | 3.972783  |
| 9  | 6 | 0 | -13.574454 | 8.943342  | 2.873963  |
| 10 | 6 | 0 | -13.036119 | 7.492213  | 2.872141  |
| 11 | 6 | 0 | -13.275593 | 9.570488  | 1.516800  |
| 12 | 1 | 0 | -14.656715 | 8.957978  | 3.053081  |
| 13 | 8 | 0 | -11.833422 | 7.270918  | 2.666706  |
| 14 | 7 | 0 | -13.935474 | 6.519554  | 3.148970  |
| 15 | 6 | 0 | -14.041759 | 8.833485  | 0.434893  |
| 16 | 6 | 0 | -13.633003 | 11.042098 | 1.492786  |
| 17 | 1 | 0 | -12.169835 | 9.462911  | 1.310441  |
| 18 | 1 | 0 | -14.907290 | 6.769733  | 3.289150  |
| 19 | 6 | 0 | -13.592826 | 5.098930  | 3.212782  |
| 20 | 1 | 0 | -13.792509 | 9.262090  | -0.565638 |
| 21 | 1 | 0 | -13.774462 | 7.748463  | 0.429995  |
| 22 | 1 | 0 | -15.142721 | 8.929322  | 0.595439  |
| 23 | 1 | 0 | -13.541482 | 11.438187 | 0.452202  |
| 24 | 1 | 0 | -14.682513 | 11.198269 | 1.840549  |
| 25 | 1 | 0 | -12.948129 | 11.628052 | 2.151497  |
| 26 | 6 | 0 | -14.357730 | 4.365087  | 2.092474  |
| 27 | 6 | 0 | -13.947080 | 4.512741  | 4.595583  |
| 28 | 1 | 0 | -12.516930 | 5.030468  | 3.039596  |
| 29 | 8 | 0 | -15.577336 | 4.496151  | 1.962698  |
| 30 | 7 | 0 | -13.581162 | 3.561457  | 1.309375  |
| 31 | 6 | 0 | -13.428779 | 3.076124  | 4.789016  |
| 32 | 1 | 0 | -13.504061 | 5.167183  | 5.356776  |
| 33 | 1 | 0 | -15.033265 | 4.526929  | 4.738893  |
| 34 | 1 | 0 | -12.563842 | 3.621957  | 1.390925  |
| 35 | 6 | 0 | -14.136568 | 2.825848  | 0.164571  |
| 36 | 6 | 0 | -13.809428 | 2.544629  | 6.173306  |
| 37 | 1 | 0 | -13.895706 | 2.408873  | 4.053835  |
| 38 | 1 | 0 | -12.343891 | 3.034335  | 4.639545  |
| 39 | 6 | 0 | -13.562766 | 1.391835  | 0.244421  |
| 40 | 6 | 0 | -13.783892 | 3.423224  | -1.197287 |
| 41 | 1 | 0 | -15.226618 | 2.836151  | 0.285248  |

|    |   |   |            |           |           |
|----|---|---|------------|-----------|-----------|
| 42 | 8 | 0 | -14.984797 | 2.452006  | 6.533129  |
| 43 | 7 | 0 | -12.758113 | 2.179588  | 6.963821  |
| 44 | 8 | 0 | -12.336807 | 1.213726  | 0.242152  |
| 45 | 7 | 0 | -14.460811 | 0.380609  | 0.337588  |
| 46 | 6 | 0 | -14.466609 | 4.771809  | -1.390685 |
| 47 | 6 | 0 | -14.182325 | 2.466646  | -2.303169 |
| 48 | 1 | 0 | -12.664689 | 3.568868  | -1.244170 |
| 49 | 1 | 0 | -12.975350 | 1.875093  | 7.903089  |
| 50 | 1 | 0 | -11.788291 | 2.332883  | 6.694469  |
| 51 | 1 | 0 | -15.453092 | 0.584560  | 0.340190  |
| 52 | 6 | 0 | -14.060952 | -1.032025 | 0.477397  |
| 53 | 6 | 0 | -13.774840 | 5.609199  | -2.436193 |
| 54 | 1 | 0 | -15.536833 | 4.605026  | -1.684791 |
| 55 | 1 | 0 | -14.481459 | 5.339310  | -0.421676 |
| 56 | 1 | 0 | -14.032923 | 2.951074  | -3.298798 |
| 57 | 1 | 0 | -13.555241 | 1.541668  | -2.267177 |
| 58 | 1 | 0 | -15.256640 | 2.174294  | -2.211770 |
| 59 | 6 | 0 | -14.782317 | -1.838624 | -0.634924 |
| 60 | 6 | 0 | -14.421812 | -1.641991 | 1.829143  |
| 61 | 1 | 0 | -12.975283 | -1.066102 | 0.344589  |
| 62 | 1 | 0 | -14.273597 | 6.605236  | -2.519504 |
| 63 | 1 | 0 | -12.702767 | 5.772903  | -2.166225 |
| 64 | 1 | 0 | -13.811502 | 5.113880  | -3.436441 |
| 65 | 8 | 0 | -16.009119 | -1.793990 | -0.752130 |
| 66 | 7 | 0 | -13.951496 | -2.571909 | -1.430981 |
| 67 | 6 | 0 | -13.908682 | -3.068203 | 1.893336  |
| 68 | 6 | 0 | -13.843742 | -0.836222 | 2.974530  |
| 69 | 1 | 0 | -15.545270 | -1.659465 | 1.929155  |
| 70 | 1 | 0 | -12.942611 | -2.528318 | -1.274912 |
| 71 | 6 | 0 | -14.461563 | -3.424366 | -2.499800 |
| 72 | 1 | 0 | -14.103773 | -3.497115 | 2.905592  |
| 73 | 1 | 0 | -14.423082 | -3.706385 | 1.135210  |
| 74 | 1 | 0 | -12.808594 | -3.098554 | 1.697573  |
| 75 | 1 | 0 | -14.014580 | -1.370809 | 3.940495  |
| 76 | 1 | 0 | -12.744357 | -0.691979 | 2.837250  |
| 77 | 1 | 0 | -14.327093 | 0.167863  | 3.045815  |
| 78 | 6 | 0 | -13.884866 | -4.857880 | -2.356118 |
| 79 | 6 | 0 | -14.135419 | -2.954110 | -3.914933 |
| 80 | 1 | 0 | -15.553276 | -3.446465 | -2.383705 |
| 81 | 8 | 0 | -12.766139 | -5.068380 | -1.870282 |
| 82 | 7 | 0 | -14.694495 | -5.838525 | -2.831470 |
| 83 | 6 | 0 | -15.076194 | -1.906691 | -4.395228 |
| 84 | 1 | 0 | -13.077163 | -2.572769 | -3.967756 |

|     |   |   |            |            |           |
|-----|---|---|------------|------------|-----------|
| 85  | 1 | 0 | -14.195443 | -3.835151  | -4.613146 |
| 86  | 1 | 0 | -15.517593 | -5.564481  | -3.358468 |
| 87  | 6 | 0 | -14.212734 | -7.201364  | -3.096850 |
| 88  | 6 | 0 | -14.769180 | -0.548921  | -4.244892 |
| 89  | 6 | 0 | -16.271467 | -2.274907  | -5.024176 |
| 90  | 6 | 0 | -14.073206 | -7.377257  | -4.634983 |
| 91  | 6 | 0 | -15.109394 | -8.290049  | -2.543880 |
| 92  | 1 | 0 | -13.230085 | -7.296071  | -2.619425 |
| 93  | 6 | 0 | -15.635284 | 0.433578   | -4.712088 |
| 94  | 1 | 0 | -13.834790 | -0.252003  | -3.742013 |
| 95  | 6 | 0 | -17.151279 | -1.307356  | -5.500447 |
| 96  | 1 | 0 | -16.519151 | -3.340684  | -5.147372 |
| 97  | 8 | 0 | -14.868130 | -6.832618  | -5.408813 |
| 98  | 7 | 0 | -13.044405 | -8.176605  | -5.010053 |
| 99  | 6 | 0 | -16.549663 | -8.194113  | -3.000909 |
| 100 | 1 | 0 | -14.676642 | -9.277777  | -2.860231 |
| 101 | 1 | 0 | -15.073156 | -8.255522  | -1.420637 |
| 102 | 6 | 0 | -16.829352 | 0.048073   | -5.342283 |
| 103 | 1 | 0 | -15.403512 | 1.501033   | -4.584553 |
| 104 | 1 | 0 | -18.089635 | -1.601746  | -5.990399 |
| 105 | 1 | 0 | -12.360648 | -8.445399  | -4.302273 |
| 106 | 6 | 0 | -12.773653 | -8.484978  | -6.405720 |
| 107 | 6 | 0 | -17.310742 | -9.455240  | -2.651448 |
| 108 | 1 | 0 | -17.045340 | -7.312723  | -2.514461 |
| 109 | 1 | 0 | -16.583253 | -8.023602  | -4.110995 |
| 110 | 8 | 0 | -17.642028 | 1.062642   | -5.794607 |
| 111 | 1 | 0 | -12.601415 | -9.560393  | -6.532864 |
| 112 | 1 | 0 | -13.639338 | -8.184642  | -6.999783 |
| 113 | 1 | 0 | -11.892044 | -7.942607  | -6.772795 |
| 114 | 6 | 0 | -18.770118 | -9.325060  | -3.085009 |
| 115 | 1 | 0 | -16.840188 | -10.336596 | -3.160887 |
| 116 | 1 | 0 | -17.252482 | -9.636880  | -1.546204 |
| 117 | 1 | 0 | -18.450683 | 0.662011   | -6.144966 |
| 118 | 7 | 0 | -19.551878 | -10.511138 | -2.826967 |
| 119 | 1 | 0 | -19.201505 | -8.406277  | -2.584619 |
| 120 | 1 | 0 | -18.802142 | -9.138705  | -4.196954 |
| 121 | 1 | 0 | -19.448164 | -10.812126 | -1.878508 |
| 122 | 1 | 0 | -20.519115 | -10.335624 | -3.011973 |
| 123 | 1 | 0 | -10.143088 | 6.639329   | 2.534318  |
| 124 | 7 | 0 | -9.146854  | 6.415350   | 2.441728  |
| 125 | 6 | 0 | -8.273671  | 7.405659   | 2.160021  |
| 126 | 6 | 0 | -8.730474  | 5.028053   | 2.643743  |
| 127 | 6 | 0 | -8.886178  | 8.821435   | 2.022226  |

|     |   |   |            |           |           |
|-----|---|---|------------|-----------|-----------|
| 128 | 8 | 0 | -7.049112  | 7.240531  | 2.030659  |
| 129 | 6 | 0 | -9.510824  | 4.137846  | 1.657015  |
| 130 | 6 | 0 | -8.996276  | 4.587808  | 4.096419  |
| 131 | 1 | 0 | -7.662572  | 4.975732  | 2.423183  |
| 132 | 7 | 0 | -8.216717  | 9.693134  | 2.998357  |
| 133 | 6 | 0 | -8.732315  | 9.274371  | 0.571905  |
| 134 | 1 | 0 | -9.950465  | 8.804110  | 2.281255  |
| 135 | 8 | 0 | -10.745570 | 4.056412  | 1.725074  |
| 136 | 7 | 0 | -8.753071  | 3.473856  | 0.752656  |
| 137 | 6 | 0 | -8.500551  | 3.157794  | 4.386344  |
| 138 | 1 | 0 | -8.488262  | 5.298149  | 4.760122  |
| 139 | 1 | 0 | -10.069601 | 4.650145  | 4.303688  |
| 140 | 1 | 0 | -7.205301  | 9.820908  | 2.923420  |
| 141 | 6 | 0 | -8.900352  | 10.382948 | 3.947416  |
| 142 | 6 | 0 | -9.484340  | 8.324928  | -0.340835 |
| 143 | 6 | 0 | -9.244169  | 10.687131 | 0.379859  |
| 144 | 1 | 0 | -7.636731  | 9.244599  | 0.299592  |
| 145 | 1 | 0 | -7.738281  | 3.602402  | 0.763389  |
| 146 | 6 | 0 | -9.344889  | 2.620463  | -0.290566 |
| 147 | 6 | 0 | -8.835355  | 2.745618  | 5.816274  |
| 148 | 1 | 0 | -9.012825  | 2.446401  | 3.726578  |
| 149 | 1 | 0 | -7.423231  | 3.080041  | 4.204792  |
| 150 | 6 | 0 | -8.042077  | 11.221445 | 4.883187  |
| 151 | 8 | 0 | -10.134193 | 10.340148 | 4.079208  |
| 152 | 1 | 0 | -9.435921  | 8.689311  | -1.395180 |
| 153 | 1 | 0 | -9.035762  | 7.302366  | -0.301649 |
| 154 | 1 | 0 | -10.557565 | 8.255081  | -0.036345 |
| 155 | 1 | 0 | -9.232399  | 10.953002 | -0.705039 |
| 156 | 1 | 0 | -10.292342 | 10.778531 | 0.756517  |
| 157 | 1 | 0 | -8.604506  | 11.420994 | 0.925748  |
| 158 | 6 | 0 | -8.769729  | 1.194795  | -0.092014 |
| 159 | 6 | 0 | -9.046074  | 3.074448  | -1.717701 |
| 160 | 1 | 0 | -10.428238 | 2.621700  | -0.130593 |
| 161 | 8 | 0 | -10.007393 | 2.613336  | 6.193773  |
| 162 | 7 | 0 | -7.774885  | 2.540066  | 6.635867  |
| 163 | 1 | 0 | -8.435648  | 12.242995 | 4.891298  |
| 164 | 1 | 0 | -8.145977  | 10.820788 | 5.897670  |
| 165 | 1 | 0 | -6.987693  | 11.227466 | 4.595896  |
| 166 | 8 | 0 | -7.543424  | 1.004051  | -0.148586 |
| 167 | 7 | 0 | -9.677871  | 0.228716  | 0.167459  |
| 168 | 6 | 0 | -9.548458  | 4.490160  | -1.970148 |
| 169 | 6 | 0 | -9.694207  | 2.105382  | -2.688365 |
| 170 | 1 | 0 | -7.928273  | 3.052505  | -1.874374 |



|     |   |   |            |           |           |
|-----|---|---|------------|-----------|-----------|
| 171 | 1 | 0 | -7.969235  | 2.301652  | 7.599218  |
| 172 | 1 | 0 | -6.811558  | 2.676174  | 6.328039  |
| 173 | 1 | 0 | -10.669912 | 0.477814  | 0.216990  |
| 174 | 6 | 0 | -9.284872  | -1.157415 | 0.463317  |
| 175 | 6 | 0 | -8.985381  | 5.077501  | -3.239919 |
| 176 | 1 | 0 | -10.670523 | 4.480592  | -2.020794 |
| 177 | 1 | 0 | -9.263374  | 5.159248  | -1.115235 |
| 178 | 1 | 0 | -9.557350  | 2.462068  | -3.737783 |
| 179 | 1 | 0 | -9.232964  | 1.090648  | -2.602304 |
| 180 | 1 | 0 | -10.789812 | 2.016942  | -2.484291 |
| 181 | 6 | 0 | -9.950161  | -2.097872 | -0.574647 |
| 182 | 6 | 0 | -9.699231  | -1.628064 | 1.856433  |
| 183 | 1 | 0 | -8.194644  | -1.209008 | 0.377220  |
| 184 | 1 | 0 | -9.288948  | 6.148929  | -3.330826 |
| 185 | 1 | 0 | -7.868988  | 5.026597  | -3.237803 |
| 186 | 1 | 0 | -9.359554  | 4.532118  | -4.139512 |
| 187 | 8 | 0 | -11.180337 | -2.110313 | -0.720402 |
| 188 | 7 | 0 | -9.091331  | -2.885748 | -1.264142 |
| 189 | 6 | 0 | -9.247065  | -3.060470 | 2.068717  |
| 190 | 6 | 0 | -9.116151  | -0.738625 | 2.934925  |
| 191 | 1 | 0 | -10.826132 | -1.593541 | 1.927025  |
| 192 | 1 | 0 | -8.086340  | -2.797983 | -1.093401 |
| 193 | 6 | 0 | -9.551250  | -3.916778 | -2.200671 |
| 194 | 1 | 0 | -9.451308  | -3.373377 | 3.121197  |
| 195 | 1 | 0 | -9.796546  | -3.752637 | 1.385491  |
| 196 | 1 | 0 | -8.151252  | -3.160891 | 1.873538  |
| 197 | 1 | 0 | -9.350123  | -1.158738 | 3.943311  |
| 198 | 1 | 0 | -8.006222  | -0.668196 | 2.828137  |
| 199 | 1 | 0 | -9.545424  | 0.290877  | 2.881017  |
| 200 | 6 | 0 | -9.104703  | -5.301012 | -1.665548 |
| 201 | 6 | 0 | -8.983847  | -3.789728 | -3.605901 |
| 202 | 1 | 0 | -10.644122 | -3.855787 | -2.238664 |
| 203 | 8 | 0 | -7.909081  | -5.527732 | -1.418183 |
| 204 | 7 | 0 | -10.095135 | -6.210057 | -1.521384 |
| 205 | 6 | 0 | -9.585685  | -2.670445 | -4.377329 |
| 206 | 1 | 0 | -7.865505  | -3.666295 | -3.559275 |
| 207 | 1 | 0 | -9.185048  | -4.758702 | -4.141798 |
| 208 | 1 | 0 | -11.064887 | -5.921642 | -1.671019 |
| 209 | 6 | 0 | -9.813933  | -7.573696 | -1.056038 |
| 210 | 6 | 0 | -9.012673  | -1.392274 | -4.339641 |
| 211 | 6 | 0 | -10.714517 | -2.892986 | -5.173387 |
| 212 | 6 | 0 | -10.077265 | -8.596461 | -2.189934 |
| 213 | 6 | 0 | -10.574185 | -7.977121 | 0.190381  |

|     |   |   |            |            |           |
|-----|---|---|------------|------------|-----------|
| 214 | 1 | 0 | -8.745147  | -7.594817  | -0.808668 |
| 215 | 6 | 0 | -9.543518  | -0.351958  | -5.093642 |
| 216 | 1 | 0 | -8.133351  | -1.208017  | -3.701537 |
| 217 | 6 | 0 | -11.262811 | -1.864081  | -5.934697 |
| 218 | 1 | 0 | -11.177233 | -3.891696  | -5.201438 |
| 219 | 8 | 0 | -11.100877 | -8.557335  | -2.891160 |
| 220 | 7 | 0 | -9.114629  | -9.531778  | -2.330283 |
| 221 | 6 | 0 | -12.081145 | -7.968144  | 0.053473  |
| 222 | 1 | 0 | -10.231168 | -9.008592  | 0.476718  |
| 223 | 1 | 0 | -10.279201 | -7.285326  | 1.027119  |
| 224 | 6 | 0 | -10.671340 | -0.594084  | -5.895315 |
| 225 | 1 | 0 | -9.102001  | 0.654667   | -5.064935 |
| 226 | 1 | 0 | -12.151879 | -2.044646  | -6.555149 |
| 227 | 1 | 0 | -8.244465  | -9.430376  | -1.805078 |
| 228 | 6 | 0 | -9.213415  | -10.586990 | -3.327964 |
| 229 | 6 | 0 | -12.724049 | -8.436854  | 1.342591  |
| 230 | 1 | 0 | -12.443593 | -6.934342  | -0.197214 |
| 231 | 1 | 0 | -12.388110 | -8.636019  | -0.796064 |
| 232 | 8 | 0 | -11.144463 | 0.469413   | -6.629591 |
| 233 | 1 | 0 | -8.518469  | -11.389698 | -3.065428 |
| 234 | 1 | 0 | -10.232144 | -10.984866 | -3.352454 |
| 235 | 1 | 0 | -8.966885  | -10.220485 | -4.333491 |
| 236 | 6 | 0 | -14.242795 | -8.494427  | 1.192656  |
| 237 | 1 | 0 | -12.333763 | -9.452148  | 1.616247  |
| 238 | 1 | 0 | -12.444887 | -7.737308  | 2.174167  |
| 239 | 1 | 0 | -11.956616 | 0.186456   | -7.074808 |
| 240 | 7 | 0 | -14.924661 | -8.901706  | 2.398786  |
| 241 | 1 | 0 | -14.595572 | -7.487874  | 0.814797  |
| 242 | 1 | 0 | -14.497799 | -9.253613  | 0.397532  |
| 243 | 1 | 0 | -14.597827 | -8.384789  | 3.190685  |
| 244 | 1 | 0 | -15.910794 | -8.763879  | 2.302176  |
| 245 | 1 | 0 | -1.924886  | 3.126570   | 5.806791  |
| 246 | 7 | 0 | -2.883204  | 2.979322   | 6.127440  |
| 247 | 6 | 0 | -3.949498  | 3.056144   | 5.296330  |
| 248 | 1 | 0 | -3.067790  | 2.836856   | 7.111578  |
| 249 | 6 | 0 | -3.636948  | 3.338909   | 3.830949  |
| 250 | 8 | 0 | -5.116140  | 2.913679   | 5.691705  |
| 251 | 6 | 0 | -4.179241  | 4.720814   | 3.416421  |
| 252 | 1 | 0 | -4.128606  | 2.552615   | 3.244573  |
| 253 | 1 | 0 | -2.558790  | 3.278579   | 3.648757  |
| 254 | 6 | 0 | -3.936047  | 5.043788   | 1.928845  |
| 255 | 1 | 0 | -3.690117  | 5.502055   | 4.010976  |
| 256 | 1 | 0 | -5.252608  | 4.770680   | 3.627150  |

|     |   |   |           |           |           |
|-----|---|---|-----------|-----------|-----------|
| 257 | 7 | 0 | -4.378311 | 6.403167  | 1.625750  |
| 258 | 6 | 0 | -4.712823 | 4.067968  | 1.022817  |
| 259 | 1 | 0 | -2.869996 | 4.989980  | 1.699927  |
| 260 | 6 | 0 | -3.535613 | 7.363080  | 1.189706  |
| 261 | 1 | 0 | -5.367594 | 6.631840  | 1.772947  |
| 262 | 8 | 0 | -5.949622 | 4.006740  | 1.083316  |
| 263 | 7 | 0 | -3.954235 | 3.313673  | 0.195436  |
| 264 | 6 | 0 | -4.174684 | 8.752497  | 0.949371  |
| 265 | 8 | 0 | -2.319361 | 7.191856  | 1.001292  |
| 266 | 1 | 0 | -2.937492 | 3.427450  | 0.211411  |
| 267 | 6 | 0 | -4.538907 | 2.345023  | -0.746957 |
| 268 | 7 | 0 | -3.480566 | 9.717317  | 1.814335  |
| 269 | 6 | 0 | -4.086297 | 9.074253  | -0.540398 |
| 270 | 1 | 0 | -5.226831 | 8.746118  | 1.255194  |
| 271 | 6 | 0 | -3.977758 | 0.952534  | -0.363731 |
| 272 | 6 | 0 | -4.209397 | 2.620852  | -2.211985 |
| 273 | 1 | 0 | -5.625070 | 2.370875  | -0.609797 |
| 274 | 1 | 0 | -2.477958 | 9.861777  | 1.676515  |
| 275 | 6 | 0 | -4.131964 | 10.448456 | 2.754379  |
| 276 | 6 | 0 | -4.852800 | 8.033922  | -1.334493 |
| 277 | 6 | 0 | -4.635709 | 10.454195 | -0.838280 |
| 278 | 1 | 0 | -3.001563 | 9.038436  | -0.852411 |
| 279 | 8 | 0 | -2.750565 | 0.759187  | -0.350818 |
| 280 | 7 | 0 | -4.897025 | 0.021090  | -0.029344 |
| 281 | 6 | 0 | -4.755581 | 3.971457  | -2.656852 |
| 282 | 6 | 0 | -4.788528 | 1.509305  | -3.066743 |
| 283 | 1 | 0 | -3.087175 | 2.623502  | -2.334341 |
| 284 | 6 | 0 | -3.252846 | 11.383805 | 3.571413  |
| 285 | 8 | 0 | -5.353476 | 10.372381 | 2.965613  |
| 286 | 1 | 0 | -4.831834 | 8.291974  | -2.420684 |
| 287 | 1 | 0 | -4.396561 | 7.022333  | -1.204528 |
| 288 | 1 | 0 | -5.918129 | 7.990655  | -0.999606 |
| 289 | 1 | 0 | -4.662213 | 10.623717 | -1.942106 |
| 290 | 1 | 0 | -5.674251 | 10.555983 | -0.438717 |
| 291 | 1 | 0 | -3.997707 | 11.246291 | -0.378850 |
| 292 | 1 | 0 | -5.891172 | 0.272742  | -0.042563 |
| 293 | 6 | 0 | -4.509621 | -1.314434 | 0.450088  |
| 294 | 6 | 0 | -4.149568 | 4.429096  | -3.959677 |
| 295 | 1 | 0 | -5.871922 | 3.901614  | -2.760250 |
| 296 | 1 | 0 | -4.545791 | 4.749067  | -1.875064 |
| 297 | 1 | 0 | -4.651893 | 1.743514  | -4.150095 |
| 298 | 1 | 0 | -4.275481 | 0.538967  | -2.853592 |
| 299 | 1 | 0 | -5.880863 | 1.386462  | -2.864926 |

|     |   |   |           |           |           |
|-----|---|---|-----------|-----------|-----------|
| 300 | 1 | 0 | -3.671117 | 12.393776 | 3.509697  |
| 301 | 1 | 0 | -3.298982 | 11.072212 | 4.620685  |
| 302 | 1 | 0 | -2.213618 | 11.388200 | 3.233063  |
| 303 | 6 | 0 | -5.141809 | -2.382010 | -0.478677 |
| 304 | 6 | 0 | -4.963038 | -1.609890 | 1.879002  |
| 305 | 1 | 0 | -3.417260 | -1.369006 | 0.402814  |
| 306 | 1 | 0 | -4.505977 | 5.459099  | -4.204950 |
| 307 | 1 | 0 | -3.034273 | 4.448818  | -3.891152 |
| 308 | 1 | 0 | -4.436871 | 3.751822  | -4.799690 |
| 309 | 8 | 0 | -6.369256 | -2.432035 | -0.637096 |
| 310 | 7 | 0 | -4.262026 | -3.227053 | -1.063464 |
| 311 | 6 | 0 | -4.459969 | -2.976224 | 2.304502  |
| 312 | 6 | 0 | -4.464934 | -0.556035 | 2.846558  |
| 313 | 1 | 0 | -6.092361 | -1.618730 | 1.902179  |
| 314 | 1 | 0 | -3.263496 | -3.116733 | -0.868004 |
| 315 | 6 | 0 | -4.684185 | -4.397776 | -1.847011 |
| 316 | 1 | 0 | -4.720431 | -3.160337 | 3.374979  |
| 317 | 1 | 0 | -4.927445 | -3.780960 | 1.686896  |
| 318 | 1 | 0 | -3.349786 | -3.040358 | 2.191979  |
| 319 | 1 | 0 | -4.700366 | -0.859241 | 3.895701  |
| 320 | 1 | 0 | -3.358874 | -0.429080 | 2.753005  |
| 321 | 1 | 0 | -4.954841 | 0.428681  | 2.653189  |
| 322 | 6 | 0 | -4.270653 | -5.654903 | -1.040108 |
| 323 | 6 | 0 | -4.024842 | -4.507329 | -3.210572 |
| 324 | 1 | 0 | -5.772901 | -4.347371 | -1.959245 |
| 325 | 8 | 0 | -3.078005 | -5.834415 | -0.741594 |
| 326 | 7 | 0 | -5.272884 | -6.494035 | -0.692295 |
| 327 | 6 | 0 | -4.485383 | -3.474469 | -4.175281 |
| 328 | 1 | 0 | -2.905363 | -4.448087 | -3.098178 |
| 329 | 1 | 0 | -4.261233 | -5.530311 | -3.615353 |
| 330 | 1 | 0 | -6.240989 | -6.244432 | -0.914606 |
| 331 | 6 | 0 | -5.004339 | -7.640443 | 0.185680  |
| 332 | 6 | 0 | -3.890434 | -2.205608 | -4.192894 |
| 333 | 6 | 0 | -5.490667 | -3.773824 | -5.101121 |
| 334 | 6 | 0 | -5.527118 | -8.954456 | -0.434452 |
| 335 | 6 | 0 | -5.532260 | -7.486565 | 1.597735  |
| 336 | 1 | 0 | -3.912929 | -7.706691 | 0.263644  |
| 337 | 6 | 0 | -4.278135 | -1.250578 | -5.125562 |
| 338 | 1 | 0 | -3.107865 | -1.960670 | -3.456534 |
| 339 | 6 | 0 | -5.889287 | -2.833243 | -6.047427 |
| 340 | 1 | 0 | -5.973246 | -4.763232 | -5.085375 |
| 341 | 8 | 0 | -6.668400 | -9.063124 | -0.909211 |
| 342 | 7 | 0 | -4.639770 | -9.971497 | -0.387856 |

|     |   |   |            |            |           |
|-----|---|---|------------|------------|-----------|
| 343 | 6 | 0 | -7.017444  | -7.224278  | 1.717355  |
| 344 | 1 | 0 | -5.272239  | -8.422030  | 2.164365  |
| 345 | 1 | 0 | -4.972644  | -6.638468  | 2.083972  |
| 346 | 6 | 0 | -5.278410  | -1.571920  | -6.058045 |
| 347 | 1 | 0 | -3.821763  | -0.250251  | -5.139797 |
| 348 | 1 | 0 | -6.679960  | -3.073154  | -6.771900 |
| 349 | 1 | 0 | -3.692702  | -9.784487  | -0.055376 |
| 350 | 6 | 0 | -4.967671  | -11.301941 | -0.878241 |
| 351 | 6 | 0 | -7.392768  | -7.069907  | 3.177637  |
| 352 | 1 | 0 | -7.297523  | -6.294759  | 1.152763  |
| 353 | 1 | 0 | -7.591844  | -8.071005  | 1.254185  |
| 354 | 8 | 0 | -5.604644  | -0.595537  | -6.971551 |
| 355 | 1 | 0 | -4.251729  | -12.018277 | -0.465620 |
| 356 | 1 | 0 | -5.977616  | -11.580885 | -0.562341 |
| 357 | 1 | 0 | -4.926262  | -11.352491 | -1.974402 |
| 358 | 6 | 0 | -8.875363  | -6.735236  | 3.323448  |
| 359 | 1 | 0 | -7.161588  | -8.017982  | 3.730823  |
| 360 | 1 | 0 | -6.768491  | -6.258065  | 3.639107  |
| 361 | 1 | 0 | -6.374355  | -0.901932  | -7.473000 |
| 362 | 7 | 0 | -9.287701  | -6.555126  | 4.695421  |
| 363 | 1 | 0 | -9.095383  | -5.826292  | 2.682951  |
| 364 | 1 | 0 | -9.479643  | -7.592095  | 2.906185  |
| 365 | 1 | 0 | -8.709313  | -5.885272  | 5.161614  |
| 366 | 1 | 0 | -10.239864 | -6.251033  | 4.734756  |
| 367 | 1 | 0 | 2.959346   | 3.653711   | 5.251409  |
| 368 | 7 | 0 | 2.008073   | 3.532366   | 5.602217  |
| 369 | 6 | 0 | 0.930388   | 3.483546   | 4.784272  |
| 370 | 1 | 0 | 1.840141   | 3.502168   | 6.599140  |
| 371 | 6 | 0 | 1.216994   | 3.593778   | 3.291192  |
| 372 | 8 | 0 | -0.227496  | 3.362589   | 5.212034  |
| 373 | 6 | 0 | 0.626446   | 4.896526   | 2.716629  |
| 374 | 1 | 0 | 0.744735   | 2.725812   | 2.813975  |
| 375 | 1 | 0 | 2.294243   | 3.543878   | 3.100446  |
| 376 | 6 | 0 | 0.840263   | 5.031138   | 1.196367  |
| 377 | 1 | 0 | 1.100766   | 5.760424   | 3.198090  |
| 378 | 1 | 0 | -0.444787  | 4.942677   | 2.939012  |
| 379 | 7 | 0 | 0.370709   | 6.332258   | 0.726733  |
| 380 | 6 | 0 | 0.070444   | 3.933664   | 0.436612  |
| 381 | 1 | 0 | 1.904001   | 4.966670   | 0.959733  |
| 382 | 1 | 0 | -0.622310  | 6.561460   | 0.845082  |
| 383 | 6 | 0 | 1.192833   | 7.234627   | 0.149873  |
| 384 | 8 | 0 | -1.164055  | 3.858424   | 0.527713  |
| 385 | 7 | 0 | 0.830980   | 3.096921   | -0.302862 |

|     |   |   |           |           |           |
|-----|---|---|-----------|-----------|-----------|
| 386 | 6 | 0 | 0.529582  | 8.573309  | -0.257135 |
| 387 | 8 | 0 | 2.407778  | 7.051417  | -0.036787 |
| 388 | 1 | 0 | 1.846452  | 3.223281  | -0.309949 |
| 389 | 6 | 0 | 0.254742  | 2.000987  | -1.099681 |
| 390 | 7 | 0 | 1.223267  | 9.651294  | 0.462075  |
| 391 | 6 | 0 | 0.587649  | 8.699613  | -1.777255 |
| 392 | 1 | 0 | -0.516996 | 8.592794  | 0.066693  |
| 393 | 6 | 0 | 0.811354  | 0.679361  | -0.512041 |
| 394 | 6 | 0 | 0.597009  | 2.062560  | -2.586040 |
| 395 | 1 | 0 | -0.832732 | 2.044221  | -0.977964 |
| 396 | 6 | 0 | 0.581457  | 10.480461 | 1.324212  |
| 397 | 1 | 0 | 2.218934  | 9.794860  | 0.280170  |
| 398 | 6 | 0 | -0.174870 | 7.553244  | -2.413697 |
| 399 | 6 | 0 | 0.009690  | 10.020735 | -2.241361 |
| 400 | 1 | 0 | 1.667269  | 8.639294  | -2.102676 |
| 401 | 8 | 0 | 2.037904  | 0.487739  | -0.460206 |
| 402 | 7 | 0 | -0.113101 | -0.189324 | -0.049316 |
| 403 | 6 | 0 | 0.055339  | 3.334908  | -3.224886 |
| 404 | 6 | 0 | 0.024587  | 0.838335  | -3.275252 |
| 405 | 1 | 0 | 1.720213  | 2.047965  | -2.698377 |
| 406 | 6 | 0 | 1.462644  | 11.523432 | 1.995885  |
| 407 | 8 | 0 | -0.632100 | 10.409758 | 1.578838  |
| 408 | 1 | 0 | -0.183598 | 7.671046  | -3.524014 |
| 409 | 1 | 0 | 0.305107  | 6.574765  | -2.167503 |
| 410 | 1 | 0 | -1.231171 | 7.534256  | -2.049224 |
| 411 | 1 | 0 | -0.036872 | 10.045305 | -3.357206 |
| 412 | 1 | 0 | -1.024173 | 10.157453 | -1.840158 |
| 413 | 1 | 0 | 0.640774  | 10.875393 | -1.899568 |
| 414 | 1 | 0 | -1.106656 | 0.056564  | -0.113742 |
| 415 | 6 | 0 | 0.264647  | -1.444112 | 0.616687  |
| 416 | 6 | 0 | 0.655151  | 3.590486  | -4.584597 |
| 417 | 1 | 0 | -1.061947 | 3.257513  | -3.311069 |
| 418 | 1 | 0 | 0.274481  | 4.218826  | -2.568698 |
| 419 | 1 | 0 | 0.179306  | 0.907436  | -4.379073 |
| 420 | 1 | 0 | 0.529714  | -0.090952 | -2.912243 |
| 421 | 1 | 0 | -1.071264 | 0.750003  | -3.074577 |
| 422 | 1 | 0 | 1.017274  | 12.510209 | 1.833026  |
| 423 | 1 | 0 | 1.459230  | 11.334920 | 3.075130  |
| 424 | 1 | 0 | 2.490042  | 11.510373 | 1.623273  |
| 425 | 6 | 0 | -0.347857 | -2.629169 | -0.171911 |
| 426 | 6 | 0 | -0.218001 | -1.540632 | 2.063086  |
| 427 | 1 | 0 | 1.357817  | -1.501868 | 0.600406  |
| 428 | 1 | 0 | 0.301614  | 4.574477  | -4.978171 |

|     |   |   |           |            |           |
|-----|---|---|-----------|------------|-----------|
| 429 | 1 | 0 | 1.770886  | 3.614450   | -4.526119 |
| 430 | 1 | 0 | 0.359382  | 2.797720   | -5.313227 |
| 431 | 8 | 0 | -1.568860 | -2.690125  | -0.371444 |
| 432 | 7 | 0 | 0.541950  | -3.556793  | -0.591925 |
| 433 | 6 | 0 | 0.245497  | -2.849760  | 2.673220  |
| 434 | 6 | 0 | 0.291182  | -0.379276  | 2.891877  |
| 435 | 1 | 0 | -1.347393 | -1.521639  | 2.067133  |
| 436 | 1 | 0 | 1.534172  | -3.422637  | -0.379870 |
| 437 | 6 | 0 | 0.137086  | -4.828204  | -1.212291 |
| 438 | 1 | 0 | -0.015837 | -2.876724  | 3.758895  |
| 439 | 1 | 0 | -0.249484 | -3.717238  | 2.172848  |
| 440 | 1 | 0 | 1.352657  | -2.963128  | 2.570340  |
| 441 | 1 | 0 | 0.020509  | -0.528586  | 3.965404  |
| 442 | 1 | 0 | 1.402810  | -0.299399  | 2.813578  |
| 443 | 1 | 0 | -0.160422 | 0.583740   | 2.551882  |
| 444 | 6 | 0 | 0.516965  | -5.947531  | -0.210435 |
| 445 | 6 | 0 | 0.850413  | -5.140598  | -2.515851 |
| 446 | 1 | 0 | -0.946180 | -4.792374  | -1.371661 |
| 447 | 8 | 0 | 1.706973  | -6.103510  | 0.111607  |
| 448 | 7 | 0 | -0.502724 | -6.687790  | 0.281826  |
| 449 | 6 | 0 | 0.485586  | -4.228939  | -3.631513 |
| 450 | 1 | 0 | 1.964834  | -5.107432  | -2.353017 |
| 451 | 1 | 0 | 0.588997  | -6.199134  | -2.793585 |
| 452 | 1 | 0 | -1.464659 | -6.472780  | 0.003295  |
| 453 | 6 | 0 | -0.243271 | -7.685011  | 1.328297  |
| 454 | 6 | 0 | 1.117573  | -2.985083  | -3.765123 |
| 455 | 6 | 0 | -0.460245 | -4.623623  | -4.583901 |
| 456 | 6 | 0 | -0.828211 | -9.063555  | 0.950904  |
| 457 | 6 | 0 | -0.701352 | -7.286366  | 2.716388  |
| 458 | 1 | 0 | 0.847638  | -7.779629  | 1.378475  |
| 459 | 6 | 0 | 0.824207  | -2.148845  | -4.836058 |
| 460 | 1 | 0 | 1.855179  | -2.664514  | -3.011507 |
| 461 | 6 | 0 | -0.763152 | -3.803699  | -5.667893 |
| 462 | 1 | 0 | -0.971594 | -5.593029  | -4.479630 |
| 463 | 8 | 0 | -1.993132 | -9.217078  | 0.550599  |
| 464 | 7 | 0 | 0.039800  | -10.084772 | 1.120477  |
| 465 | 6 | 0 | -2.167675 | -6.943256  | 2.859453  |
| 466 | 1 | 0 | -0.448460 | -8.132889  | 3.412204  |
| 467 | 1 | 0 | -0.088625 | -6.398085  | 3.040086  |
| 468 | 6 | 0 | -0.116517 | -2.566488  | -5.792004 |
| 469 | 1 | 0 | 1.308885  | -1.167541  | -4.941693 |
| 470 | 1 | 0 | -1.507633 | -4.117990  | -6.412578 |
| 471 | 1 | 0 | 1.001068  | -9.873850  | 1.391184  |

|     |   |   |           |            |           |
|-----|---|---|-----------|------------|-----------|
| 472 | 6 | 0 | -0.340484 | -11.465762 | 0.861487  |
| 473 | 6 | 0 | -2.472723 | -6.617631  | 4.308410  |
| 474 | 1 | 0 | -2.426947 | -6.065967  | 2.208906  |
| 475 | 1 | 0 | -2.798021 | -7.805381  | 2.511031  |
| 476 | 8 | 0 | -0.346794 | -1.709201  | -6.843835 |
| 477 | 1 | 0 | 0.446345  | -12.124301 | 1.238846  |
| 478 | 1 | 0 | -1.281382 | -11.705948 | 1.368056  |
| 479 | 1 | 0 | -0.474226 | -11.651717 | -0.211824 |
| 480 | 6 | 0 | -3.937205 | -6.224885  | 4.485778  |
| 481 | 1 | 0 | -2.238547 | -7.505853  | 4.952629  |
| 482 | 1 | 0 | -1.808328 | -5.778118  | 4.648956  |
| 483 | 1 | 0 | -1.096935 | -2.053712  | -7.350234 |
| 484 | 7 | 0 | -4.280173 | -5.913643  | 5.852672  |
| 485 | 1 | 0 | -4.159124 | -5.367514  | 3.777447  |
| 486 | 1 | 0 | -4.586714 | -7.092763  | 4.168271  |
| 487 | 1 | 0 | -3.700424 | -5.183938  | 6.215067  |
| 488 | 1 | 0 | -5.239502 | -5.637862  | 5.916390  |
| 489 | 1 | 0 | 12.705405 | 4.521268   | 3.673544  |
| 490 | 7 | 0 | 11.770192 | 4.512028   | 4.075728  |
| 491 | 6 | 0 | 10.660958 | 4.249916   | 3.341983  |
| 492 | 1 | 0 | 11.643982 | 4.737772   | 5.053565  |
| 493 | 6 | 0 | 10.887740 | 3.956370   | 1.863059  |
| 494 | 8 | 0 | 9.523384  | 4.251186   | 3.832784  |
| 495 | 6 | 0 | 10.222592 | 5.032969   | 0.984150  |
| 496 | 1 | 0 | 10.435455 | 2.976941   | 1.663371  |
| 497 | 1 | 0 | 11.958196 | 3.884368   | 1.641377  |
| 498 | 6 | 0 | 10.361648 | 4.754937   | -0.527080 |
| 499 | 1 | 0 | 10.680170 | 6.008972   | 1.186823  |
| 500 | 1 | 0 | 9.161172  | 5.108750   | 1.241882  |
| 501 | 7 | 0 | 9.822406  | 5.874707   | -1.295748 |
| 502 | 6 | 0 | 9.598775  | 3.472324   | -0.913937 |
| 503 | 1 | 0 | 11.415020 | 4.656655   | -0.795250 |
| 504 | 6 | 0 | 10.585914 | 6.617496   | -2.125484 |
| 505 | 1 | 0 | 8.831629  | 6.115466   | -1.179809 |
| 506 | 8 | 0 | 8.367921  | 3.422921   | -0.781541 |
| 507 | 7 | 0 | 10.357753 | 2.449685   | -1.369314 |
| 508 | 6 | 0 | 9.862063  | 7.800859   | -2.815993 |
| 509 | 8 | 0 | 11.795078 | 6.407374   | -2.332334 |
| 510 | 1 | 0 | 11.365244 | 2.588339   | -1.467259 |
| 511 | 6 | 0 | 9.782060  | 1.162749   | -1.805071 |
| 512 | 7 | 0 | 10.546701 | 9.044519   | -2.429340 |
| 513 | 6 | 0 | 9.842783  | 7.538914   | -4.319579 |
| 514 | 1 | 0 | 8.831806  | 7.879159   | -2.451049 |



|     |   |   |           |           |           |
|-----|---|---|-----------|-----------|-----------|
| 515 | 6 | 0 | 10.391776 | 0.059756  | -0.899728 |
| 516 | 6 | 0 | 10.075601 | 0.811878  | -3.261379 |
| 517 | 1 | 0 | 8.698718  | 1.224185  | -1.656825 |
| 518 | 6 | 0 | 9.904587  | 10.060330 | -1.792733 |
| 519 | 1 | 0 | 11.516505 | 9.181885  | -2.715805 |
| 520 | 6 | 0 | 9.076426  | 6.261013  | -4.603942 |
| 521 | 6 | 0 | 9.214344  | 8.693451  | -5.072311 |
| 522 | 1 | 0 | 10.906390 | 7.407190  | -4.675231 |
| 523 | 8 | 0 | 11.621857 | -0.117547 | -0.871735 |
| 524 | 7 | 0 | 9.506044  | -0.640462 | -0.155793 |
| 525 | 6 | 0 | 9.490684  | 1.847349  | -4.212921 |
| 526 | 6 | 0 | 9.512025  | -0.563771 | -3.564204 |
| 527 | 1 | 0 | 11.195272 | 0.779592  | -3.402412 |
| 528 | 6 | 0 | 10.761373 | 11.276011 | -1.472965 |
| 529 | 8 | 0 | 8.708570  | 10.021420 | -1.466813 |
| 530 | 1 | 0 | 9.008605  | 6.094642  | -5.705988 |
| 531 | 1 | 0 | 9.591880  | 5.381413  | -4.146702 |
| 532 | 1 | 0 | 8.040678  | 6.323729  | -4.188780 |
| 533 | 1 | 0 | 9.104027  | 8.429149  | -6.152097 |
| 534 | 1 | 0 | 8.202533  | 8.925446  | -4.658860 |
| 535 | 1 | 0 | 9.847768  | 9.609599  | -5.000875 |
| 536 | 1 | 0 | 8.507425  | -0.420072 | -0.228736 |
| 537 | 6 | 0 | 9.941217  | -1.646305 | 0.824568  |
| 538 | 6 | 0 | 10.064553 | 1.728450  | -5.602483 |
| 539 | 1 | 0 | 8.374894  | 1.724159  | -4.250938 |
| 540 | 1 | 0 | 9.694261  | 2.883077  | -3.831687 |
| 541 | 1 | 0 | 9.649400  | -0.810860 | -4.645161 |
| 542 | 1 | 0 | 10.041437 | -1.346428 | -2.965585 |
| 543 | 1 | 0 | 8.420986  | -0.605264 | -3.325293 |
| 544 | 1 | 0 | 10.256798 | 12.165130 | -1.864334 |
| 545 | 1 | 0 | 10.815372 | 11.382286 | -0.383825 |
| 546 | 1 | 0 | 11.769604 | 11.206301 | -1.887686 |
| 547 | 6 | 0 | 9.299035  | -3.013660 | 0.474400  |
| 548 | 6 | 0 | 9.562385  | -1.299414 | 2.264037  |
| 549 | 1 | 0 | 11.031599 | -1.712541 | 0.749409  |
| 550 | 1 | 0 | 9.675212  | 2.552985  | -6.247819 |
| 551 | 1 | 0 | 11.179771 | 1.796471  | -5.576650 |
| 552 | 1 | 0 | 9.784496  | 0.755309  | -6.073199 |
| 553 | 8 | 0 | 8.074440  | -3.119297 | 0.323874  |
| 554 | 7 | 0 | 10.172990 | -4.043024 | 0.384573  |
| 555 | 6 | 0 | 10.041232 | -2.387755 | 3.205599  |
| 556 | 6 | 0 | 10.154900 | 0.031997  | 2.678839  |
| 557 | 1 | 0 | 8.437224  | -1.233439 | 2.333854  |

|     |   |   |           |            |           |
|-----|---|---|-----------|------------|-----------|
| 558 | 1 | 0 | 11.175172 | -3.849028  | 0.435701  |
| 559 | 6 | 0 | 9.757250  | -5.437343  | 0.159670  |
| 560 | 1 | 0 | 9.873930  | -2.075706  | 4.265203  |
| 561 | 1 | 0 | 9.482486  | -3.338903  | 3.030586  |
| 562 | 1 | 0 | 11.132216 | -2.581947  | 3.061785  |
| 563 | 1 | 0 | 9.947952  | 0.221727   | 3.760120  |
| 564 | 1 | 0 | 11.261536 | 0.034197   | 2.523261  |
| 565 | 1 | 0 | 9.709609  | 0.868846   | 2.088873  |
| 566 | 6 | 0 | 10.107948 | -6.231262  | 1.446319  |
| 567 | 1 | 0 | 8.676395  | -5.436090  | -0.020213 |
| 568 | 8 | 0 | 11.297842 | -6.344673  | 1.790806  |
| 569 | 7 | 0 | 9.067865  | -6.746436  | 2.141249  |
| 570 | 6 | 0 | 10.378053 | -5.399806  | -2.283327 |
| 571 | 1 | 0 | 8.108013  | -6.591118  | 1.817091  |
| 572 | 6 | 0 | 9.308869  | -7.419871  | 3.423598  |
| 573 | 6 | 0 | 11.245220 | -4.335457  | -2.570071 |
| 574 | 6 | 0 | 8.646620  | -8.816881  | 3.462405  |
| 575 | 6 | 0 | 8.918020  | -6.621999  | 4.651555  |
| 576 | 1 | 0 | 10.393767 | -7.557491  | 3.479780  |
| 577 | 6 | 0 | 11.180516 | -3.674958  | -3.791107 |
| 578 | 1 | 0 | 11.987500 | -4.015351  | -1.818029 |
| 579 | 8 | 0 | 7.468149  | -9.022502  | 3.134090  |
| 580 | 7 | 0 | 9.468831  | -9.793202  | 3.908732  |
| 581 | 6 | 0 | 7.472702  | -6.181678  | 4.715841  |
| 582 | 1 | 0 | 9.155064  | -7.251155  | 5.553062  |
| 583 | 1 | 0 | 9.578989  | -5.711190  | 4.705086  |
| 584 | 6 | 0 | 10.234690 | -4.090307  | -4.743583 |
| 585 | 1 | 0 | 11.855316 | -2.836829  | -4.020747 |
| 586 | 1 | 0 | 10.439516 | -9.559568  | 4.110855  |
| 587 | 6 | 0 | 9.016184  | -11.169350 | 4.054978  |
| 588 | 6 | 0 | 7.225719  | -5.427428  | 6.007129  |
| 589 | 1 | 0 | 7.226030  | -5.525755  | 3.838897  |
| 590 | 1 | 0 | 6.799525  | -7.079037  | 4.651403  |
| 591 | 8 | 0 | 10.217295 | -3.399409  | -5.933973 |
| 592 | 1 | 0 | 9.817599  | -11.757179 | 4.510206  |
| 593 | 1 | 0 | 8.128540  | -11.220960 | 4.695501  |
| 594 | 1 | 0 | 8.761860  | -11.610304 | 3.083422  |
| 595 | 6 | 0 | 5.766112  | -4.993159  | 6.112632  |
| 596 | 1 | 0 | 7.490809  | -6.077363  | 6.882505  |
| 597 | 1 | 0 | 7.896882  | -4.527689  | 6.047856  |
| 598 | 1 | 0 | 9.478810  | -3.735489  | -6.462662 |
| 599 | 7 | 0 | 5.472055  | -4.282843  | 7.333754  |
| 600 | 1 | 0 | 5.512004  | -4.388659  | 5.187292  |

|     |   |   |           |           |           |
|-----|---|---|-----------|-----------|-----------|
| 601 | 1 | 0 | 5.113093  | -5.914851 | 6.094512  |
| 602 | 1 | 0 | 6.041844  | -3.466273 | 7.424774  |
| 603 | 1 | 0 | 4.507373  | -4.019936 | 7.359785  |
| 604 | 6 | 0 | 9.367247  | -5.157565 | -4.474675 |
| 605 | 1 | 0 | 8.627521  | -5.474454 | -5.223020 |
| 606 | 6 | 0 | 9.443338  | -5.802051 | -3.242349 |
| 607 | 1 | 0 | 8.756190  | -6.634029 | -3.023928 |
| 608 | 6 | 0 | 10.485474 | -6.118217 | -0.986861 |
| 609 | 1 | 0 | 10.058425 | -7.153579 | -1.086110 |
| 610 | 1 | 0 | 11.574957 | -6.230156 | -0.718292 |
| 611 | 1 | 0 | 7.837679  | 4.152502  | 4.546982  |
| 612 | 7 | 0 | 6.896168  | 4.071435  | 4.931962  |
| 613 | 6 | 0 | 5.802774  | 3.900784  | 4.151461  |
| 614 | 1 | 0 | 6.749482  | 4.174240  | 5.927396  |
| 615 | 6 | 0 | 6.058138  | 3.808982  | 2.651341  |
| 616 | 8 | 0 | 4.655517  | 3.828822  | 4.616636  |
| 617 | 6 | 0 | 5.438242  | 5.014732  | 1.918706  |
| 618 | 1 | 0 | 5.588363  | 2.879283  | 2.306655  |
| 619 | 1 | 0 | 7.131980  | 3.744269  | 2.445275  |
| 620 | 6 | 0 | 5.611228  | 4.943165  | 0.388468  |
| 621 | 1 | 0 | 5.913296  | 5.940649  | 2.265103  |
| 622 | 1 | 0 | 4.372480  | 5.081245  | 2.161003  |
| 623 | 7 | 0 | 5.110243  | 6.162805  | -0.239262 |
| 624 | 6 | 0 | 4.840365  | 3.743256  | -0.193146 |
| 625 | 1 | 0 | 6.669596  | 4.860191  | 0.134165  |
| 626 | 6 | 0 | 5.907955  | 6.992492  | -0.944826 |
| 627 | 1 | 0 | 4.116644  | 6.394406  | -0.131346 |
| 628 | 8 | 0 | 3.607441  | 3.680253  | -0.076610 |
| 629 | 7 | 0 | 5.596460  | 2.806386  | -0.805437 |
| 630 | 6 | 0 | 5.215958  | 8.255963  | -1.511129 |
| 631 | 8 | 0 | 7.122633  | 6.800944  | -1.128220 |
| 632 | 1 | 0 | 6.609096  | 2.940562  | -0.858560 |
| 633 | 6 | 0 | 5.019065  | 1.596207  | -1.413369 |
| 634 | 7 | 0 | 5.903460  | 9.427155  | -0.949402 |
| 635 | 6 | 0 | 5.249335  | 8.183339  | -3.035588 |
| 636 | 1 | 0 | 4.173966  | 8.301924  | -1.175260 |
| 637 | 6 | 0 | 5.597611  | 0.386543  | -0.634120 |
| 638 | 6 | 0 | 5.335787  | 1.427936  | -2.897279 |
| 639 | 1 | 0 | 3.933512  | 1.649040  | -1.279400 |
| 640 | 6 | 0 | 5.259884  | 10.365384 | -0.209105 |
| 641 | 1 | 0 | 6.896985  | 9.549205  | -1.155489 |
| 642 | 6 | 0 | 4.504936  | 6.947528  | -3.503924 |
| 643 | 6 | 0 | 4.634386  | 9.420114  | -3.657564 |

|     |   |   |          |           |           |
|-----|---|---|----------|-----------|-----------|
| 644 | 1 | 0 | 6.325252 | 8.103613  | -3.369069 |
| 645 | 8 | 0 | 6.825671 | 0.206661  | -0.576302 |
| 646 | 7 | 0 | 4.684852 | -0.395893 | -0.017916 |
| 647 | 6 | 0 | 4.819099 | 2.607203  | -3.711166 |
| 648 | 6 | 0 | 4.716804 | 0.132940  | -3.388042 |
| 649 | 1 | 0 | 6.455939 | 1.363811  | -3.021494 |
| 650 | 6 | 0 | 6.135737 | 11.501060 | 0.299627  |
| 651 | 8 | 0 | 4.048617 | 10.323664 | 0.060682  |
| 652 | 1 | 0 | 4.472727 | 6.921957  | -4.619757 |
| 653 | 1 | 0 | 5.014577 | 6.020028  | -3.145417 |
| 654 | 1 | 0 | 3.456361 | 6.950913  | -3.117435 |
| 655 | 1 | 0 | 4.573654 | 9.299113  | -4.766408 |
| 656 | 1 | 0 | 3.602537 | 9.584867  | -3.261670 |
| 657 | 1 | 0 | 5.248926 | 10.325551 | -3.438392 |
| 658 | 1 | 0 | 3.689245 | -0.168803 | -0.111045 |
| 659 | 6 | 0 | 5.074313 | -1.533587 | 0.828312  |
| 660 | 6 | 0 | 5.341222 | 2.599032  | -5.125794 |
| 661 | 1 | 0 | 3.696168 | 2.583849  | -3.721734 |
| 662 | 1 | 0 | 5.124970 | 3.572302  | -3.226492 |
| 663 | 1 | 0 | 4.917392 | -0.007119 | -4.478310 |
| 664 | 1 | 0 | 5.153447 | -0.742905 | -2.846818 |
| 665 | 1 | 0 | 3.611209 | 0.138946  | -3.225203 |
| 666 | 1 | 0 | 5.702016 | 12.449167 | -0.034945 |
| 667 | 1 | 0 | 6.108307 | 11.495419 | 1.394643  |
| 668 | 1 | 0 | 7.169881 | 11.423186 | -0.045193 |
| 669 | 6 | 0 | 4.452540 | -2.825865 | 0.240831  |
| 670 | 6 | 0 | 4.610948 | -1.403583 | 2.278053  |
| 671 | 1 | 0 | 6.167618 | -1.592566 | 0.804287  |
| 672 | 1 | 0 | 5.023783 | 3.530798  | -5.654210 |
| 673 | 1 | 0 | 6.457587 | 2.551316  | -5.135193 |
| 674 | 1 | 0 | 4.948078 | 1.723952  | -5.697272 |
| 675 | 8 | 0 | 3.227029 | -2.922490 | 0.084628  |
| 676 | 7 | 0 | 5.339666 | -3.800928 | -0.056435 |
| 677 | 6 | 0 | 5.047290 | -2.618961 | 3.073453  |
| 678 | 6 | 0 | 5.162167 | -0.146453 | 2.918763  |
| 679 | 1 | 0 | 3.482524 | -1.353884 | 2.290884  |
| 680 | 1 | 0 | 6.338427 | -3.626899 | 0.079903  |
| 681 | 6 | 0 | 4.934502 | -5.143325 | -0.501426 |
| 682 | 1 | 0 | 4.785268 | -2.480389 | 4.150550  |
| 683 | 1 | 0 | 4.533807 | -3.539946 | 2.704454  |
| 684 | 1 | 0 | 6.151426 | -2.769596 | 2.992988  |
| 685 | 1 | 0 | 4.897280 | -0.122850 | 4.003765  |
| 686 | 1 | 0 | 6.274913 | -0.113756 | 2.823912  |

|     |   |   |           |            |           |
|-----|---|---|-----------|------------|-----------|
| 687 | 1 | 0 | 4.736093  | 0.766930   | 2.438149  |
| 688 | 6 | 0 | 5.301567  | -6.115784  | 0.647693  |
| 689 | 1 | 0 | 3.853062  | -5.126871  | -0.674981 |
| 690 | 8 | 0 | 6.489151  | -6.225029  | 0.997121  |
| 691 | 7 | 0 | 4.277742  | -6.779823  | 1.230356  |
| 692 | 6 | 0 | 5.467227  | -4.759206  | -2.931800 |
| 693 | 1 | 0 | 3.316757  | -6.605243  | 0.921085  |
| 694 | 6 | 0 | 4.532088  | -7.623154  | 2.405580  |
| 695 | 6 | 0 | 6.254115  | -3.610778  | -3.098648 |
| 696 | 6 | 0 | 3.909641  | -9.027208  | 2.240009  |
| 697 | 6 | 0 | 4.110267  | -7.018171  | 3.729292  |
| 698 | 1 | 0 | 5.620980  | -7.736644  | 2.454247  |
| 699 | 6 | 0 | 6.111242  | -2.808111  | -4.224272 |
| 700 | 1 | 0 | 6.994513  | -3.339187  | -2.327267 |
| 701 | 8 | 0 | 2.736891  | -9.212784  | 1.878162  |
| 702 | 7 | 0 | 4.758523  | -10.031742 | 2.551805  |
| 703 | 6 | 0 | 2.653636  | -6.628548  | 3.846534  |
| 704 | 1 | 0 | 4.362725  | -7.759777  | 4.536074  |
| 705 | 1 | 0 | 4.744818  | -6.104863  | 3.909956  |
| 706 | 6 | 0 | 5.166370  | -3.163411  | -5.201452 |
| 707 | 1 | 0 | 6.720021  | -1.901842  | -4.357997 |
| 708 | 1 | 0 | 5.726120  | -9.801153  | 2.778483  |
| 709 | 6 | 0 | 4.346896  | -11.427228 | 2.508087  |
| 710 | 6 | 0 | 2.385479  | -6.079482  | 5.233937  |
| 711 | 1 | 0 | 2.394424  | -5.855955  | 3.074547  |
| 712 | 1 | 0 | 2.002445  | -7.521757  | 3.646024  |
| 713 | 8 | 0 | 5.075868  | -2.335832  | -6.297933 |
| 714 | 1 | 0 | 5.117261  | -12.037647 | 2.986916  |
| 715 | 1 | 0 | 3.400491  | -11.563537 | 3.041964  |
| 716 | 1 | 0 | 4.209765  | -11.775011 | 1.476192  |
| 717 | 6 | 0 | 0.923752  | -5.666968  | 5.385710  |
| 718 | 1 | 0 | 2.641613  | -6.854824  | 6.003456  |
| 719 | 1 | 0 | 3.053153  | -5.195432  | 5.420109  |
| 720 | 1 | 0 | 4.331036  | -2.637873  | -6.838205 |
| 721 | 7 | 0 | 0.611217  | -5.155710  | 6.698510  |
| 722 | 1 | 0 | 0.680889  | -4.925277  | 4.562894  |
| 723 | 1 | 0 | 0.272583  | -6.574282  | 5.215705  |
| 724 | 1 | 0 | 1.185911  | -4.370420  | 6.928387  |
| 725 | 1 | 0 | -0.351469 | -4.888792  | 6.747730  |
| 726 | 6 | 0 | 4.373998  | -4.309162  | -5.049778 |
| 727 | 1 | 0 | 3.631824  | -4.576657  | -5.814861 |
| 728 | 6 | 0 | 4.528008  | -5.096748  | -3.911448 |
| 729 | 1 | 0 | 3.900469  | -5.992439  | -3.784627 |

|     |   |   |           |           |           |
|-----|---|---|-----------|-----------|-----------|
| 730 | 6 | 0 | 5.662065  | -5.629210 | -1.742869 |
| 731 | 1 | 0 | 5.289122  | -6.666892 | -1.963674 |
| 732 | 1 | 0 | 6.763799  | -5.710654 | -1.520029 |
| 733 | 1 | 0 | 17.623562 | 4.502788  | 2.796582  |
| 734 | 7 | 0 | 16.703545 | 4.588401  | 3.202061  |
| 735 | 6 | 0 | 15.571406 | 4.359196  | 2.477253  |
| 736 | 1 | 0 | 16.614326 | 4.886348  | 4.164683  |
| 737 | 6 | 0 | 15.772488 | 3.933638  | 1.027331  |
| 738 | 8 | 0 | 14.448119 | 4.486722  | 2.970636  |
| 739 | 6 | 0 | 15.091567 | 4.926329  | 0.065695  |
| 740 | 1 | 0 | 15.320904 | 2.937363  | 0.933806  |
| 741 | 1 | 0 | 16.838312 | 3.832372  | 0.788401  |
| 742 | 6 | 0 | 15.145606 | 4.492040  | -1.416151 |
| 743 | 1 | 0 | 15.575656 | 5.907200  | 0.139541  |
| 744 | 1 | 0 | 14.044852 | 5.052011  | 0.359763  |
| 745 | 7 | 0 | 14.541746 | 5.504307  | -2.271202 |
| 746 | 6 | 0 | 14.373966 | 3.178460  | -1.615873 |
| 747 | 1 | 0 | 16.188818 | 4.390457  | -1.732496 |
| 748 | 6 | 0 | 15.297496 | 6.353356  | -3.014259 |
| 749 | 1 | 0 | 13.524725 | 5.630006  | -2.246944 |
| 750 | 8 | 0 | 13.144647 | 3.160201  | -1.470788 |
| 751 | 7 | 0 | 15.109939 | 2.089651  | -1.933285 |
| 752 | 6 | 0 | 14.490221 | 7.359363  | -3.871602 |
| 753 | 8 | 0 | 16.533900 | 6.357607  | -3.023459 |
| 754 | 1 | 0 | 16.120114 | 2.157790  | -1.965889 |
| 755 | 6 | 0 | 14.535652 | 0.738137  | -2.063391 |
| 756 | 7 | 0 | 15.174034 | 8.653648  | -3.750473 |
| 757 | 6 | 0 | 14.389071 | 6.829841  | -5.300421 |
| 758 | 1 | 0 | 13.478533 | 7.482328  | -3.470858 |
| 759 | 6 | 0 | 15.189799 | -0.124965 | -0.948774 |
| 760 | 6 | 0 | 14.784781 | 0.089944  | -3.422134 |
| 761 | 1 | 0 | 13.456514 | 0.826098  | -1.900012 |
| 762 | 6 | 0 | 14.549165 | 9.793424  | -3.356164 |
| 763 | 1 | 0 | 16.184351 | 8.628135  | -3.818999 |
| 764 | 6 | 0 | 13.731248 | 7.844522  | -6.214141 |
| 765 | 1 | 0 | 15.427239 | 6.619660  | -5.686139 |
| 766 | 8 | 0 | 16.402844 | -0.044385 | -0.726447 |
| 767 | 7 | 0 | 14.329928 | -0.930245 | -0.267902 |
| 768 | 6 | 0 | 14.149911 | 0.898225  | -4.548341 |
| 769 | 6 | 0 | 14.224370 | -1.320779 | -3.409428 |
| 770 | 1 | 0 | 15.896780 | 0.035401  | -3.600634 |
| 771 | 6 | 0 | 15.445431 | 11.011652 | -3.186438 |
| 772 | 8 | 0 | 13.330357 | 9.864715  | -3.145194 |

|     |   |   |           |           |           |
|-----|---|---|-----------|-----------|-----------|
| 773 | 1 | 0 | 13.560006 | 7.395468  | -7.222612 |
| 774 | 1 | 0 | 12.746642 | 8.167073  | -5.795998 |
| 775 | 1 | 0 | 14.375932 | 8.746518  | -6.341319 |
| 776 | 1 | 0 | 13.323404 | -0.826218 | -0.422051 |
| 777 | 6 | 0 | 14.792130 | -1.761393 | 0.847931  |
| 778 | 6 | 0 | 14.757649 | 0.570958  | -5.889218 |
| 779 | 1 | 0 | 13.046013 | 0.692128  | -4.572771 |
| 780 | 1 | 0 | 14.272186 | 1.997485  | -4.360964 |
| 781 | 1 | 0 | 14.188462 | -1.732069 | -4.447107 |
| 782 | 1 | 0 | 14.866707 | -1.992688 | -2.790852 |
| 783 | 1 | 0 | 13.187773 | -1.328278 | -2.988481 |
| 784 | 1 | 0 | 15.096366 | 11.797970 | -3.863249 |
| 785 | 1 | 0 | 15.337967 | 11.384776 | -2.163065 |
| 786 | 1 | 0 | 16.501559 | 10.807736 | -3.387528 |
| 787 | 6 | 0 | 14.142486 | -3.161168 | 0.715197  |
| 788 | 6 | 0 | 14.456557 | -1.215554 | 2.238765  |
| 789 | 1 | 0 | 15.883376 | -1.820211 | 0.753626  |
| 790 | 1 | 0 | 14.267255 | 1.178124  | -6.688483 |
| 791 | 1 | 0 | 15.851060 | 0.799244  | -5.894325 |
| 792 | 1 | 0 | 14.624909 | -0.509199 | -6.139650 |
| 793 | 8 | 0 | 12.943970 | -3.277467 | 0.431295  |
| 794 | 7 | 0 | 14.968934 | -4.211682 | 0.944123  |
| 795 | 6 | 0 | 15.249633 | -1.955513 | 3.298987  |
| 796 | 6 | 0 | 14.744724 | 0.270318  | 2.332047  |
| 797 | 1 | 0 | 13.355586 | -1.375955 | 2.430206  |
| 798 | 1 | 0 | 15.897246 | -4.022484 | 1.307896  |
| 799 | 6 | 0 | 14.485193 | -5.584795 | 1.152994  |
| 800 | 1 | 0 | 15.044554 | -1.510186 | 4.303036  |
| 801 | 1 | 0 | 14.973239 | -3.036935 | 3.340949  |
| 802 | 1 | 0 | 16.345658 | -1.876739 | 3.098633  |
| 803 | 1 | 0 | 14.733816 | 0.597600  | 3.399893  |
| 804 | 1 | 0 | 15.746963 | 0.502901  | 1.895369  |
| 805 | 1 | 0 | 13.971301 | 0.858803  | 1.781383  |
| 806 | 6 | 0 | 14.744897 | -5.942793 | 2.642069  |
| 807 | 1 | 0 | 13.416304 | -5.609243 | 0.915080  |
| 808 | 8 | 0 | 15.779655 | -5.558809 | 3.196618  |
| 809 | 7 | 0 | 13.818812 | -6.745449 | 3.236849  |
| 810 | 6 | 0 | 15.177153 | -6.393711 | -1.133144 |
| 811 | 1 | 0 | 12.876476 | -6.803867 | 2.840492  |
| 812 | 6 | 0 | 14.045421 | -7.165427 | 4.622696  |
| 813 | 6 | 0 | 16.173351 | -5.626950 | -1.753057 |
| 814 | 6 | 0 | 13.282335 | -8.474688 | 4.917832  |
| 815 | 6 | 0 | 13.719712 | -6.129989 | 5.684713  |

|     |   |   |           |            |           |
|-----|---|---|-----------|------------|-----------|
| 816 | 1 | 0 | 15.124513 | -7.356434  | 4.706055  |
| 817 | 6 | 0 | 16.167897 | -5.426835  | -3.128228 |
| 818 | 1 | 0 | 16.970919 | -5.175539  | -1.142981 |
| 819 | 8 | 0 | 12.184658 | -8.745613  | 4.417350  |
| 820 | 7 | 0 | 13.900763 | -9.295291  | 5.804685  |
| 821 | 6 | 0 | 12.282235 | -5.659271  | 5.680149  |
| 822 | 1 | 0 | 13.966132 | -6.568426  | 6.688985  |
| 823 | 1 | 0 | 14.399299 | -5.246425  | 5.531278  |
| 824 | 6 | 0 | 15.145704 | -6.007968  | -3.897528 |
| 825 | 1 | 0 | 16.944837 | -4.826643  | -3.621734 |
| 826 | 1 | 0 | 14.819960 | -9.039600  | 6.138404  |
| 827 | 6 | 0 | 13.301571 | -10.539805 | 6.274408  |
| 828 | 6 | 0 | 12.036286 | -4.711236  | 6.835149  |
| 829 | 1 | 0 | 12.049443 | -5.143324  | 4.710756  |
| 830 | 1 | 0 | 11.592049 | -6.543265  | 5.751792  |
| 831 | 8 | 0 | 15.193860 | -5.781813  | -5.253603 |
| 832 | 1 | 0 | 13.847072 | -10.885927 | 7.156053  |
| 833 | 1 | 0 | 12.255058 | -10.372151 | 6.546442  |
| 834 | 1 | 0 | 13.340667 | -11.318454 | 5.503159  |
| 835 | 6 | 0 | 10.583589 | -4.239206  | 6.836728  |
| 836 | 1 | 0 | 12.268022 | -5.225562  | 7.804645  |
| 837 | 1 | 0 | 12.725931 | -3.830644  | 6.751217  |
| 838 | 1 | 0 | 14.411049 | -6.189460  | -5.652057 |
| 839 | 7 | 0 | 10.271378 | -3.371944  | 7.946345  |
| 840 | 1 | 0 | 10.370286 | -3.756556  | 5.833263  |
| 841 | 1 | 0 | 9.909333  | -5.142479  | 6.914034  |
| 842 | 1 | 0 | 10.868452 | -2.569960  | 7.959584  |
| 843 | 1 | 0 | 9.316924  | -3.076780  | 7.900479  |
| 844 | 6 | 0 | 14.143971 | -6.779975  | -3.293006 |
| 845 | 1 | 0 | 13.346295 | -7.228799  | -3.901252 |
| 846 | 6 | 0 | 14.166465 | -6.964989  | -1.913176 |
| 847 | 1 | 0 | 13.379588 | -7.568057  | -1.434065 |
| 848 | 6 | 0 | 15.221903 | -6.632242  | 0.332846  |
| 849 | 1 | 0 | 14.751997 | -7.627165  | 0.567825  |
| 850 | 1 | 0 | 16.295146 | -6.681609  | 0.667954  |
| 851 | 6 | 0 | 13.594288 | 5.537043   | -5.309194 |
| 852 | 1 | 0 | 14.194283 | 4.699880   | -4.878203 |
| 853 | 1 | 0 | 12.654813 | 5.647979   | -4.711388 |
| 854 | 1 | 0 | 13.320751 | 5.263353   | -6.356798 |



P Pl (Ac-VQIVYK-NHMe)<sub>8</sub>

|    |   |   |            |           |           |
|----|---|---|------------|-----------|-----------|
| 1  | 6 | 0 | -15.604431 | 10.187509 | 6.555582  |
| 2  | 6 | 0 | -16.333429 | 9.544262  | 5.382869  |
| 3  | 1 | 0 | -16.133550 | 11.106372 | 6.829898  |
| 4  | 1 | 0 | -15.660557 | 9.508258  | 7.412605  |
| 5  | 1 | 0 | -14.558583 | 10.415107 | 6.331240  |
| 6  | 8 | 0 | -17.518880 | 9.205163  | 5.455502  |
| 7  | 7 | 0 | -15.574532 | 9.382337  | 4.257285  |
| 8  | 1 | 0 | -14.581800 | 9.623078  | 4.266761  |
| 9  | 6 | 0 | -16.131561 | 8.733537  | 3.066139  |
| 10 | 6 | 0 | -15.584737 | 7.286193  | 3.023767  |
| 11 | 6 | 0 | -15.777911 | 9.424635  | 1.754414  |
| 12 | 1 | 0 | -17.220604 | 8.734662  | 3.198558  |
| 13 | 8 | 0 | -14.377006 | 7.077662  | 2.833723  |
| 14 | 7 | 0 | -16.483282 | 6.300733  | 3.253301  |
| 15 | 6 | 0 | -16.478917 | 8.726019  | 0.605039  |
| 16 | 6 | 0 | -16.157042 | 10.890752 | 1.778331  |
| 17 | 1 | 0 | -14.661952 | 9.341116  | 1.597404  |
| 18 | 1 | 0 | -17.457289 | 6.542335  | 3.393215  |
| 19 | 6 | 0 | -16.128339 | 4.882677  | 3.297463  |
| 20 | 1 | 0 | -16.189210 | 9.202847  | -0.362172 |
| 21 | 1 | 0 | -16.192314 | 7.646747  | 0.566474  |
| 22 | 1 | 0 | -17.587760 | 8.797847  | 0.715851  |
| 23 | 1 | 0 | -16.018187 | 11.335415 | 0.762917  |
| 24 | 1 | 0 | -17.225495 | 11.016525 | 2.077314  |
| 25 | 1 | 0 | -15.516634 | 11.455077 | 2.497839  |
| 26 | 6 | 0 | -16.859003 | 4.158176  | 2.148779  |
| 27 | 6 | 0 | -16.505780 | 4.267518  | 4.661858  |
| 28 | 1 | 0 | -15.048208 | 4.828316  | 3.147267  |
| 29 | 8 | 0 | -18.075993 | 4.279868  | 1.988662  |
| 30 | 7 | 0 | -16.055531 | 3.368760  | 1.378790  |
| 31 | 6 | 0 | -15.974466 | 2.834179  | 4.842537  |
| 32 | 1 | 0 | -16.087455 | 4.913608  | 5.443893  |
| 33 | 1 | 0 | -17.594800 | 4.266628  | 4.782211  |
| 34 | 1 | 0 | -15.041124 | 3.436094  | 1.487071  |
| 35 | 6 | 0 | -16.575810 | 2.620350  | 0.226635  |
| 36 | 6 | 0 | -16.379076 | 2.273007  | 6.208321  |
| 37 | 1 | 0 | -16.416202 | 2.173793  | 4.085817  |
| 38 | 1 | 0 | -14.886207 | 2.806647  | 4.716263  |
| 39 | 6 | 0 | -15.980423 | 1.196396  | 0.316497  |
| 40 | 6 | 0 | -16.210926 | 3.224132  | -1.129794 |

|    |   |   |            |           |           |
|----|---|---|------------|-----------|-----------|
| 41 | 1 | 0 | -17.668002 | 2.610148  | 0.327496  |
| 42 | 8 | 0 | -17.560007 | 2.184363  | 6.550654  |
| 43 | 7 | 0 | -15.342390 | 1.875104  | 7.002160  |
| 44 | 8 | 0 | -14.752890 | 1.036465  | 0.354921  |
| 45 | 7 | 0 | -16.866152 | 0.171387  | 0.363339  |
| 46 | 6 | 0 | -17.000578 | 4.504563  | -1.372768 |
| 47 | 6 | 0 | -16.465074 | 2.221670  | -2.237450 |
| 48 | 1 | 0 | -15.108015 | 3.468896  | -1.129300 |
| 49 | 1 | 0 | -15.575576 | 1.545932  | 7.929196  |
| 50 | 1 | 0 | -14.367254 | 2.024077  | 6.749950  |
| 51 | 1 | 0 | -17.861031 | 0.361438  | 0.340109  |
| 52 | 6 | 0 | -16.452858 | -1.240590 | 0.468664  |
| 53 | 6 | 0 | -16.324755 | 5.401105  | -2.378633 |
| 54 | 1 | 0 | -18.030851 | 4.240818  | -1.731309 |
| 55 | 1 | 0 | -17.126303 | 5.065231  | -0.407527 |
| 56 | 1 | 0 | -16.350277 | 2.713659  | -3.233889 |
| 57 | 1 | 0 | -15.730536 | 1.380443  | -2.176281 |
| 58 | 1 | 0 | -17.498204 | 1.801386  | -2.171215 |
| 59 | 6 | 0 | -17.160985 | -2.012446 | -0.675789 |
| 60 | 6 | 0 | -16.820396 | -1.893448 | 1.797751  |
| 61 | 1 | 0 | -15.365767 | -1.260964 | 0.343787  |
| 62 | 1 | 0 | -16.915768 | 6.339274  | -2.513176 |
| 63 | 1 | 0 | -15.297546 | 5.676723  | -2.035348 |
| 64 | 1 | 0 | -16.237296 | 4.896236  | -3.371014 |
| 65 | 8 | 0 | -18.389581 | -1.992687 | -0.782982 |
| 66 | 7 | 0 | -16.318982 | -2.678697 | -1.517025 |
| 67 | 6 | 0 | -16.305013 | -3.320037 | 1.820275  |
| 68 | 6 | 0 | -16.249571 | -1.122775 | 2.970563  |
| 69 | 1 | 0 | -17.944406 | -1.916324 | 1.890329  |
| 70 | 1 | 0 | -15.309944 | -2.618627 | -1.366853 |
| 71 | 6 | 0 | -16.819210 | -3.471567 | -2.635376 |
| 72 | 1 | 0 | -16.529569 | -3.789161 | 2.808295  |
| 73 | 1 | 0 | -16.793967 | -3.928095 | 1.021552  |
| 74 | 1 | 0 | -15.199481 | -3.340297 | 1.657947  |
| 75 | 1 | 0 | -16.425900 | -1.686601 | 3.918692  |
| 76 | 1 | 0 | -15.149407 | -0.974231 | 2.843942  |
| 77 | 1 | 0 | -16.733542 | -0.121291 | 3.068842  |
| 78 | 6 | 0 | -16.215533 | -4.899896 | -2.585052 |
| 79 | 6 | 0 | -16.514408 | -2.902176 | -4.018968 |
| 80 | 1 | 0 | -17.909207 | -3.524302 | -2.512560 |
| 81 | 8 | 0 | -15.094800 | -5.122073 | -2.109398 |
| 82 | 7 | 0 | -17.006535 | -5.861270 | -3.126620 |
| 83 | 6 | 0 | -17.535332 | -1.914503 | -4.461809 |

|     |   |   |            |            |           |
|-----|---|---|------------|------------|-----------|
| 84  | 1 | 0 | -15.492048 | -2.430367  | -4.034711 |
| 85  | 1 | 0 | -16.487623 | -3.745342  | -4.764377 |
| 86  | 1 | 0 | -17.833277 | -5.567624  | -3.637166 |
| 87  | 6 | 0 | -16.502174 | -7.197034  | -3.474117 |
| 88  | 6 | 0 | -17.355393 | -0.545832  | -4.228051 |
| 89  | 6 | 0 | -18.679873 | -2.350077  | -5.140409 |
| 90  | 6 | 0 | -16.351960 | -7.274454  | -5.019261 |
| 91  | 6 | 0 | -17.384255 | -8.331976  | -2.995546 |
| 92  | 1 | 0 | -15.520603 | -7.306490  | -2.997614 |
| 93  | 6 | 0 | -18.296228 | 0.381709   | -4.662155 |
| 94  | 1 | 0 | -16.463237 | -0.194083  | -3.684677 |
| 95  | 6 | 0 | -19.633547 | -1.438429  | -5.583560 |
| 96  | 1 | 0 | -18.827507 | -3.424731  | -5.330442 |
| 97  | 8 | 0 | -17.153547 | -6.698320  | -5.762882 |
| 98  | 7 | 0 | -15.305652 | -8.028888  | -5.436565 |
| 99  | 6 | 0 | -18.824050 | -8.228999  | -3.452506 |
| 100 | 1 | 0 | -16.935190 | -9.291016  | -3.371763 |
| 101 | 1 | 0 | -17.352865 | -8.368232  | -1.872196 |
| 102 | 6 | 0 | -19.437983 | -0.071063  | -5.342546 |
| 103 | 1 | 0 | -18.161844 | 1.456551   | -4.473022 |
| 104 | 1 | 0 | -20.531423 | -1.786084  | -6.112915 |
| 105 | 1 | 0 | -14.621071 | -8.328951  | -4.742212 |
| 106 | 6 | 0 | -15.022603 | -8.246573  | -6.846754 |
| 107 | 6 | 0 | -19.566995 | -9.521117  | -3.187401 |
| 108 | 1 | 0 | -19.335140 | -7.387900  | -2.913507 |
| 109 | 1 | 0 | -18.855947 | -7.988909  | -4.549701 |
| 110 | 8 | 0 | -20.329033 | 0.891756   | -5.758678 |
| 111 | 1 | 0 | -14.832486 | -9.309314  | -7.038712 |
| 112 | 1 | 0 | -15.889868 | -7.923862  | -7.426609 |
| 113 | 1 | 0 | -14.147784 | -7.668991  | -7.174228 |
| 114 | 6 | 0 | -21.026528 | -9.385668  | -3.618798 |
| 115 | 1 | 0 | -19.081013 | -10.361149 | -3.749446 |
| 116 | 1 | 0 | -19.510195 | -9.771650  | -2.095632 |
| 117 | 1 | 0 | -21.090512 | 0.441925   | -6.152355 |
| 118 | 7 | 0 | -21.791100 | -10.597315 | -3.440186 |
| 119 | 1 | 0 | -21.473829 | -8.507070  | -3.063254 |
| 120 | 1 | 0 | -21.057188 | -9.129664  | -4.716840 |
| 121 | 1 | 0 | -21.685442 | -10.956925 | -2.512579 |
| 122 | 1 | 0 | -22.760367 | -10.424564 | -3.617014 |
| 123 | 1 | 0 | -12.678425 | 6.446531   | 2.759590  |
| 124 | 7 | 0 | -11.676887 | 6.236742   | 2.695631  |
| 125 | 6 | 0 | -10.807022 | 7.246081   | 2.477732  |
| 126 | 6 | 0 | -11.249980 | 4.847100   | 2.855935  |

|     |   |   |            |           |           |
|-----|---|---|------------|-----------|-----------|
| 127 | 6 | 0 | -11.430569 | 8.660249  | 2.375596  |
| 128 | 8 | 0 | -9.577572  | 7.097888  | 2.378676  |
| 129 | 6 | 0 | -12.002919 | 3.985080  | 1.824327  |
| 130 | 6 | 0 | -11.538674 | 4.350226  | 4.286264  |
| 131 | 1 | 0 | -10.177462 | 4.813513  | 2.654802  |
| 132 | 7 | 0 | -10.800101 | 9.500305  | 3.404027  |
| 133 | 6 | 0 | -11.238007 | 9.168726  | 0.948380  |
| 134 | 1 | 0 | -12.501881 | 8.622783  | 2.601061  |
| 135 | 8 | 0 | -13.237909 | 3.891478  | 1.867067  |
| 136 | 7 | 0 | -11.223456 | 3.356234  | 0.913008  |
| 137 | 6 | 0 | -11.040872 | 2.912498  | 4.529012  |
| 138 | 1 | 0 | -11.046266 | 5.036818  | 4.985749  |
| 139 | 1 | 0 | -12.615852 | 4.399271  | 4.476408  |
| 140 | 1 | 0 | -9.787983  | 9.639020  | 3.365915  |
| 141 | 6 | 0 | -11.519567 | 10.153508 | 4.352400  |
| 142 | 6 | 0 | -11.966106 | 8.255514  | -0.019134 |
| 143 | 6 | 0 | -11.743187 | 10.588715 | 0.796488  |
| 144 | 1 | 0 | -10.135515 | 9.147907  | 0.704481  |
| 145 | 1 | 0 | -10.210918 | 3.500292  | 0.939413  |
| 146 | 6 | 0 | -11.792695 | 2.539564  | -0.171753 |
| 147 | 6 | 0 | -11.396833 | 2.444567  | 5.936506  |
| 148 | 1 | 0 | -11.539296 | 2.225257  | 3.834021  |
| 149 | 1 | 0 | -9.960415  | 2.845822  | 4.362396  |
| 150 | 6 | 0 | -10.698699 | 10.963747 | 5.344982  |
| 151 | 8 | 0 | -12.756917 | 10.099746 | 4.441434  |
| 152 | 1 | 0 | -11.889512 | 8.658920  | -1.057460 |
| 153 | 1 | 0 | -11.519365 | 7.231489  | -0.006364 |
| 154 | 1 | 0 | -13.047114 | 8.175676  | 0.254199  |
| 155 | 1 | 0 | -11.709449 | 10.892872 | -0.277849 |
| 156 | 1 | 0 | -12.798300 | 10.669882 | 1.155602  |
| 157 | 1 | 0 | -11.112610 | 11.300928 | 1.380384  |
| 158 | 6 | 0 | -11.188787 | 1.118168  | -0.038231 |
| 159 | 6 | 0 | -11.499894 | 3.065385  | -1.575350 |
| 160 | 1 | 0 | -12.876249 | 2.511123  | -0.015809 |
| 161 | 8 | 0 | -12.574270 | 2.299543  | 6.291992  |
| 162 | 7 | 0 | -10.348182 | 2.204626  | 6.761967  |
| 163 | 1 | 0 | -11.097617 | 11.982885 | 5.373303  |
| 164 | 1 | 0 | -10.836087 | 10.528954 | 6.341273  |
| 165 | 1 | 0 | -9.634970  | 10.983713 | 5.095261  |
| 166 | 8 | 0 | -9.959878  | 0.952625  | -0.114870 |
| 167 | 7 | 0 | -12.077079 | 0.125442  | 0.187835  |
| 168 | 6 | 0 | -12.019970 | 4.485035  | -1.761611 |
| 169 | 6 | 0 | -12.135513 | 2.136226  | -2.592178 |

|     |   |   |            |           |           |
|-----|---|---|------------|-----------|-----------|
| 170 | 1 | 0 | -10.381796 | 3.064939  | -1.731655 |
| 171 | 1 | 0 | -10.556113 | 1.929430  | 7.712587  |
| 172 | 1 | 0 | -9.380996  | 2.354947  | 6.473203  |
| 173 | 1 | 0 | -13.072211 | 0.354214  | 0.264173  |
| 174 | 6 | 0 | -11.658851 | -1.266539 | 0.412648  |
| 175 | 6 | 0 | -11.459538 | 5.139856  | -2.999165 |
| 176 | 1 | 0 | -13.141597 | 4.463704  | -1.818023 |
| 177 | 1 | 0 | -11.747340 | 5.116247  | -0.874466 |
| 178 | 1 | 0 | -11.993560 | 2.540343  | -3.623616 |
| 179 | 1 | 0 | -11.668825 | 1.121345  | -2.547974 |
| 180 | 1 | 0 | -13.232296 | 2.032658  | -2.400641 |
| 181 | 6 | 0 | -12.318689 | -2.165681 | -0.665214 |
| 182 | 6 | 0 | -12.053229 | -1.811482 | 1.784307  |
| 183 | 1 | 0 | -10.568846 | -1.296235 | 0.314710  |
| 184 | 1 | 0 | -11.777001 | 6.210359  | -3.040018 |
| 185 | 1 | 0 | -10.342574 | 5.103669  | -2.994171 |
| 186 | 1 | 0 | -11.822666 | 4.633164  | -3.925501 |
| 187 | 8 | 0 | -13.549713 | -2.189406 | -0.803227 |
| 188 | 7 | 0 | -11.453685 | -2.906089 | -1.398528 |
| 189 | 6 | 0 | -11.568456 | -3.242047 | 1.925439  |
| 190 | 6 | 0 | -11.481585 | -0.961850 | 2.900444  |
| 191 | 1 | 0 | -13.180062 | -1.804518 | 1.863437  |
| 192 | 1 | 0 | -10.448827 | -2.811308 | -1.230545 |
| 193 | 6 | 0 | -11.905865 | -3.895328 | -2.382445 |
| 194 | 1 | 0 | -11.762030 | -3.610392 | 2.961814  |
| 195 | 1 | 0 | -12.104093 | -3.912641 | 1.210554  |
| 196 | 1 | 0 | -10.471261 | -3.307752 | 1.723116  |
| 197 | 1 | 0 | -11.697160 | -1.435772 | 3.888876  |
| 198 | 1 | 0 | -10.374521 | -0.860424 | 2.789014  |
| 199 | 1 | 0 | -11.934843 | 0.058761  | 2.899919  |
| 200 | 6 | 0 | -11.431688 | -5.298109 | -1.924692 |
| 201 | 6 | 0 | -11.356766 | -3.685996 | -3.785181 |
| 202 | 1 | 0 | -12.999953 | -3.851352 | -2.406717 |
| 203 | 8 | 0 | -10.231599 | -5.516326 | -1.692154 |
| 204 | 7 | 0 | -12.405122 | -6.231782 | -1.830125 |
| 205 | 6 | 0 | -11.991360 | -2.543077 | -4.493220 |
| 206 | 1 | 0 | -10.240838 | -3.540941 | -3.744115 |
| 207 | 1 | 0 | -11.543684 | -4.630874 | -4.367317 |
| 208 | 1 | 0 | -13.380217 | -5.952997 | -1.961863 |
| 209 | 6 | 0 | -12.099748 | -7.614636 | -1.443514 |
| 210 | 6 | 0 | -11.436437 | -1.259040 | -4.410946 |
| 211 | 6 | 0 | -13.133959 | -2.747637 | -5.274273 |
| 212 | 6 | 0 | -12.344367 | -8.573876 | -2.635913 |

|     |   |   |            |            |           |
|-----|---|---|------------|------------|-----------|
| 213 | 6 | 0 | -12.855439 | -8.102427  | -0.224666 |
| 214 | 1 | 0 | -11.031124 | -7.631199  | -1.194951 |
| 215 | 6 | 0 | -11.998368 | -0.194984  | -5.107120 |
| 216 | 1 | 0 | -10.546411 | -1.089212  | -3.783771 |
| 217 | 6 | 0 | -13.713856 | -1.694765  | -5.977198 |
| 218 | 1 | 0 | -13.583232 | -3.750954  | -5.336326 |
| 219 | 8 | 0 | -13.369076 | -8.511606  | -3.334096 |
| 220 | 7 | 0 | -11.365134 | -9.481740  | -2.830440 |
| 221 | 6 | 0 | -14.361925 | -8.113244  | -0.366802 |
| 222 | 1 | 0 | -12.494114 | -9.142070  | 0.003648  |
| 223 | 1 | 0 | -12.575839 | -7.454199  | 0.651274  |
| 224 | 6 | 0 | -13.139930 | -0.418862  | -5.894483 |
| 225 | 1 | 0 | -11.570474 | 0.815920   | -5.043650 |
| 226 | 1 | 0 | -14.613844 | -1.861729  | -6.585648 |
| 227 | 1 | 0 | -10.495863 | -9.394525  | -2.301016 |
| 228 | 6 | 0 | -11.444085 | -10.477894 | -3.888615 |
| 229 | 6 | 0 | -15.000464 | -8.668662  | 0.889582  |
| 230 | 1 | 0 | -14.742764 | -7.073295  | -0.557777 |
| 231 | 1 | 0 | -14.653841 | -8.735559  | -1.255350 |
| 232 | 8 | 0 | -13.644778 | 0.668541   | -6.570352 |
| 233 | 1 | 0 | -10.757928 | -11.297790 | -3.657437 |
| 234 | 1 | 0 | -12.463517 | -10.868197 | -3.957447 |
| 235 | 1 | 0 | -11.173793 | -10.055954 | -4.866013 |
| 236 | 6 | 0 | -16.517336 | -8.744892  | 0.729022  |
| 237 | 1 | 0 | -14.592475 | -9.690997  | 1.104936  |
| 238 | 1 | 0 | -14.737486 | -8.014241  | 1.762126  |
| 239 | 1 | 0 | -14.459577 | 0.391434   | -7.014385 |
| 240 | 7 | 0 | -17.196359 | -9.235682  | 1.905322  |
| 241 | 1 | 0 | -16.887201 | -7.724211  | 0.410008  |
| 242 | 1 | 0 | -16.755261 | -9.459738  | -0.111213 |
| 243 | 1 | 0 | -16.880277 | -8.762845  | 2.728528  |
| 244 | 1 | 0 | -18.184249 | -9.107592  | 1.813273  |
| 245 | 1 | 0 | -4.497366  | 2.827998   | 6.020659  |
| 246 | 7 | 0 | -5.460143  | 2.669626   | 6.322525  |
| 247 | 6 | 0 | -6.514084  | 2.789270   | 5.481075  |
| 248 | 1 | 0 | -5.658523  | 2.477593   | 7.295464  |
| 249 | 6 | 0 | -6.179075  | 3.141286   | 4.035767  |
| 250 | 8 | 0 | -7.686788  | 2.630877   | 5.852167  |
| 251 | 6 | 0 | -6.711020  | 4.543408   | 3.679726  |
| 252 | 1 | 0 | -6.664720  | 2.385918   | 3.405391  |
| 253 | 1 | 0 | -5.098451  | 3.085911   | 3.867061  |
| 254 | 6 | 0 | -6.442813  | 4.938833   | 2.214267  |
| 255 | 1 | 0 | -6.230433  | 5.293607   | 4.319533  |

|     |   |   |           |           |           |
|-----|---|---|-----------|-----------|-----------|
| 256 | 1 | 0 | -7.787746 | 4.585936  | 3.874369  |
| 257 | 7 | 0 | -6.891908 | 6.307922  | 1.970375  |
| 258 | 6 | 0 | -7.194322 | 4.001358  | 1.248516  |
| 259 | 1 | 0 | -5.372369 | 4.904219  | 2.002575  |
| 260 | 6 | 0 | -6.050278 | 7.298137  | 1.605388  |
| 261 | 1 | 0 | -7.884999 | 6.520919  | 2.114446  |
| 262 | 8 | 0 | -8.431036 | 3.922374  | 1.287509  |
| 263 | 7 | 0 | -6.414214 | 3.297195  | 0.397073  |
| 264 | 6 | 0 | -6.698748 | 8.692609  | 1.427737  |
| 265 | 8 | 0 | -4.828931 | 7.149111  | 1.433208  |
| 266 | 1 | 0 | -5.399754 | 3.427697  | 0.428033  |
| 267 | 6 | 0 | -6.973620 | 2.373942  | -0.604533 |
| 268 | 7 | 0 | -6.036609 | 9.613222  | 2.363288  |
| 269 | 6 | 0 | -6.576761 | 9.099076  | -0.038826 |
| 270 | 1 | 0 | -7.757977 | 8.658977  | 1.706012  |
| 271 | 6 | 0 | -6.389050 | 0.971804  | -0.298952 |
| 272 | 6 | 0 | -6.639293 | 2.740978  | -2.048418 |
| 273 | 1 | 0 | -8.060973 | 2.371496  | -0.474505 |
| 274 | 1 | 0 | -5.031386 | 9.770421  | 2.262981  |
| 275 | 6 | 0 | -6.720620 | 10.294593 | 3.317494  |
| 276 | 6 | 0 | -7.309708 | 8.097132  | -0.910167 |
| 277 | 6 | 0 | -7.135608 | 10.487541 | -0.272625 |
| 278 | 1 | 0 | -5.484084 | 9.092858  | -0.324048 |
| 279 | 8 | 0 | -5.158844 | 0.800325  | -0.284898 |
| 280 | 7 | 0 | -7.293778 | 0.004631  | -0.031126 |
| 281 | 6 | 0 | -7.212549 | 4.102678  | -2.419411 |
| 282 | 6 | 0 | -7.186676 | 1.668564  | -2.971346 |
| 283 | 1 | 0 | -5.516497 | 2.775484  | -2.160521 |
| 284 | 6 | 0 | -5.872251 | 11.190464 | 4.207859  |
| 285 | 8 | 0 | -7.947837 | 10.203968 | 3.485963  |
| 286 | 1 | 0 | -7.260306 | 8.414333  | -1.979656 |
| 287 | 1 | 0 | -6.847268 | 7.083824  | -0.822220 |
| 288 | 1 | 0 | -8.383692 | 8.026627  | -0.609393 |
| 289 | 1 | 0 | -7.136698 | 10.718895 | -1.365478 |
| 290 | 1 | 0 | -8.184956 | 10.555256 | 0.105432  |
| 291 | 1 | 0 | -6.519077 | 11.259290 | 0.246833  |
| 292 | 1 | 0 | -8.292260 | 0.238465  | -0.037548 |
| 293 | 6 | 0 | -6.884825 | -1.349146 | 0.373424  |
| 294 | 6 | 0 | -6.602074 | 4.651387  | -3.684416 |
| 295 | 1 | 0 | -8.325563 | 4.013018  | -2.541728 |
| 296 | 1 | 0 | -7.031173 | 4.836900  | -1.589987 |
| 297 | 1 | 0 | -7.049584 | 1.970055  | -4.037880 |
| 298 | 1 | 0 | -6.651854 | 0.699699  | -2.812026 |

|     |   |   |           |           |           |
|-----|---|---|-----------|-----------|-----------|
| 299 | 1 | 0 | -8.276909 | 1.508289  | -2.784914 |
| 300 | 1 | 0 | -6.294299 | 12.200496 | 4.184855  |
| 301 | 1 | 0 | -5.948638 | 10.825350 | 5.237945  |
| 302 | 1 | 0 | -4.823342 | 11.216302 | 3.902105  |
| 303 | 6 | 0 | -7.507574 | -2.373840 | -0.608136 |
| 304 | 6 | 0 | -7.325140 | -1.728513 | 1.786697  |
| 305 | 1 | 0 | -5.792104 | -1.385303 | 0.317912  |
| 306 | 1 | 0 | -6.982305 | 5.684583  | -3.874237 |
| 307 | 1 | 0 | -5.488659 | 4.695591  | -3.598751 |
| 308 | 1 | 0 | -6.860487 | 4.017418  | -4.566549 |
| 309 | 8 | 0 | -8.735304 | -2.433395 | -0.761790 |
| 310 | 7 | 0 | -6.619871 | -3.173777 | -1.242339 |
| 311 | 6 | 0 | -6.806724 | -3.111701 | 2.131786  |
| 312 | 6 | 0 | -6.829152 | -0.725692 | 2.808010  |
| 313 | 1 | 0 | -8.454115 | -1.749416 | 1.817096  |
| 314 | 1 | 0 | -5.621387 | -3.058468 | -1.048729 |
| 315 | 6 | 0 | -7.031492 | -4.308359 | -2.082403 |
| 316 | 1 | 0 | -7.056503 | -3.357316 | 3.192416  |
| 317 | 1 | 0 | -7.272627 | -3.885100 | 1.474247  |
| 318 | 1 | 0 | -5.697034 | -3.159476 | 2.007089  |
| 319 | 1 | 0 | -7.055694 | -1.088108 | 3.840174  |
| 320 | 1 | 0 | -5.724690 | -0.584895 | 2.715019  |
| 321 | 1 | 0 | -7.327773 | 0.264207  | 2.671889  |
| 322 | 6 | 0 | -6.587974 | -5.599671 | -1.348679 |
| 323 | 6 | 0 | -6.387505 | -4.334330 | -3.457459 |
| 324 | 1 | 0 | -8.122130 | -4.270923 | -2.179907 |
| 325 | 8 | 0 | -5.390079 | -5.773341 | -1.068941 |
| 326 | 7 | 0 | -7.571706 | -6.475844 | -1.041487 |
| 327 | 6 | 0 | -6.886604 | -3.267662 | -4.364582 |
| 328 | 1 | 0 | -5.268332 | -4.251954 | -3.356457 |
| 329 | 1 | 0 | -6.603563 | -5.342000 | -3.909306 |
| 330 | 1 | 0 | -8.546144 | -6.232034 | -1.241213 |
| 331 | 6 | 0 | -7.274499 | -7.666777 | -0.234716 |
| 332 | 6 | 0 | -6.334417 | -1.980355 | -4.316688 |
| 333 | 6 | 0 | -7.885141 | -3.551266 | -5.302594 |
| 334 | 6 | 0 | -7.777667 | -8.949720 | -0.931178 |
| 335 | 6 | 0 | -7.795107 | -7.607195 | 1.187047  |
| 336 | 1 | 0 | -6.181457 | -7.716592 | -0.168225 |
| 337 | 6 | 0 | -6.757679 | -0.991040 | -5.196644 |
| 338 | 1 | 0 | -5.556948 | -1.748438 | -3.570753 |
| 339 | 6 | 0 | -8.318578 | -2.576116 | -6.197246 |
| 340 | 1 | 0 | -8.334456 | -4.555695 | -5.338083 |
| 341 | 8 | 0 | -8.923246 | -9.052897 | -1.397008 |



|     |   |   |            |            |           |
|-----|---|---|------------|------------|-----------|
| 342 | 7 | 0 | -6.868528  | -9.947453  | -0.965848 |
| 343 | 6 | 0 | -9.284148  | -7.380951  | 1.329735  |
| 344 | 1 | 0 | -7.513738  | -8.569455  | 1.695525  |
| 345 | 1 | 0 | -7.248295  | -6.778824  | 1.719528  |
| 346 | 6 | 0 | -7.750205  | -1.296213  | -6.142715 |
| 347 | 1 | 0 | -6.334941  | 0.023436   | -5.158734 |
| 348 | 1 | 0 | -9.103611  | -2.803981  | -6.931648 |
| 349 | 1 | 0 | -5.921015  | -9.764389  | -0.632180 |
| 350 | 6 | 0 | -7.176551  | -11.246137 | -1.546139 |
| 351 | 6 | 0 | -9.654658  | -7.325416  | 2.798257  |
| 352 | 1 | 0 | -9.584508  | -6.423389  | 0.825686  |
| 353 | 1 | 0 | -9.845143  | -8.207827  | 0.816903  |
| 354 | 8 | 0 | -8.112020  | -0.284792  | -7.003171 |
| 355 | 1 | 0 | -6.407804  | -11.960961 | -1.240119 |
| 356 | 1 | 0 | -8.152666  | -11.596711 | -1.195906 |
| 357 | 1 | 0 | -7.203100  | -11.203250 | -2.642924 |
| 358 | 6 | 0 | -11.141200 | -7.021882  | 2.969945  |
| 359 | 1 | 0 | -9.407659  | -8.303499  | 3.288768  |
| 360 | 1 | 0 | -9.040098  | -6.535759  | 3.308472  |
| 361 | 1 | 0 | -8.874167  | -0.589315  | -7.517132 |
| 362 | 7 | 0 | -11.553050 | -6.946219  | 4.351761  |
| 363 | 1 | 0 | -11.374921 | -6.072691  | 2.396327  |
| 364 | 1 | 0 | -11.735079 | -7.854667  | 2.493208  |
| 365 | 1 | 0 | -10.975567 | -6.312471  | 4.866974  |
| 366 | 1 | 0 | -12.505732 | -6.647728  | 4.414297  |
| 367 | 1 | 0 | 0.373175   | 3.379565   | 5.565675  |
| 368 | 7 | 0 | -0.587026  | 3.233148   | 5.882058  |
| 369 | 6 | 0 | -1.641877  | 3.240304   | 5.034127  |
| 370 | 1 | 0 | -0.781973  | 3.136830   | 6.869819  |
| 371 | 6 | 0 | -1.315362  | 3.449345   | 3.559760  |
| 372 | 8 | 0 | -2.811102  | 3.091903   | 5.421193  |
| 373 | 6 | 0 | -1.900474  | 4.782574   | 3.054482  |
| 374 | 1 | 0 | -1.767657  | 2.611504   | 3.014396  |
| 375 | 1 | 0 | -0.232881  | 3.417988   | 3.397435  |
| 376 | 6 | 0 | -1.652809  | 5.015929   | 1.550837  |
| 377 | 1 | 0 | -1.443831  | 5.616295   | 3.601668  |
| 378 | 1 | 0 | -2.977067  | 4.808830   | 3.252667  |
| 379 | 7 | 0 | -2.124787  | 6.340932   | 1.154930  |
| 380 | 6 | 0 | -2.396551  | 3.962736   | 0.706341  |
| 381 | 1 | 0 | -0.583614  | 4.975265   | 1.334236  |
| 382 | 1 | 0 | -3.122471  | 6.552696   | 1.265289  |
| 383 | 6 | 0 | -1.297085  | 7.290876   | 0.669273  |
| 384 | 8 | 0 | -3.631646  | 3.870342   | 0.768202  |

|     |   |   |           |           |           |
|-----|---|---|-----------|-----------|-----------|
| 385 | 7 | 0 | -1.613680 | 3.180398  | -0.069921 |
| 386 | 6 | 0 | -1.963102 | 8.648670  | 0.337278  |
| 387 | 8 | 0 | -0.075226 | 7.134809  | 0.507383  |
| 388 | 1 | 0 | -0.600107 | 3.321407  | -0.054390 |
| 389 | 6 | 0 | -2.166128 | 2.136785  | -0.949850 |
| 390 | 7 | 0 | -1.298270 | 9.680002  | 1.146871  |
| 391 | 6 | 0 | -1.866891 | 8.879866  | -1.168527 |
| 392 | 1 | 0 | -3.017938 | 8.637760  | 0.633579  |
| 393 | 6 | 0 | -1.591501 | 0.784007  | -0.458306 |
| 394 | 6 | 0 | -1.814632 | 2.313023  | -2.425001 |
| 395 | 1 | 0 | -3.254858 | 2.154380  | -0.833190 |
| 396 | 6 | 0 | -1.970625 | 10.442946 | 2.045809  |
| 397 | 1 | 0 | -0.298822 | 9.841500  | 1.004470  |
| 398 | 6 | 0 | -2.600632 | 7.773700  | -1.902449 |
| 399 | 6 | 0 | -2.446330 | 10.224836 | -1.555990 |
| 400 | 1 | 0 | -0.778597 | 8.851433  | -1.468493 |
| 401 | 8 | 0 | -0.362335 | 0.607033  | -0.419317 |
| 402 | 7 | 0 | -2.503150 | -0.131074 | -0.063357 |
| 403 | 6 | 0 | -2.368813 | 3.622034  | -2.972500 |
| 404 | 6 | 0 | -2.365049 | 1.136356  | -3.208565 |
| 405 | 1 | 0 | -0.690535 | 2.321670  | -2.528645 |
| 406 | 6 | 0 | -1.117671 | 11.443576 | 2.811522  |
| 407 | 8 | 0 | -3.190263 | 10.346157 | 2.260529  |
| 408 | 1 | 0 | -2.581322 | 7.967658  | -3.001896 |
| 409 | 1 | 0 | -2.117366 | 6.784614  | -1.711244 |
| 410 | 1 | 0 | -3.665919 | 7.720786  | -1.568803 |
| 411 | 1 | 0 | -2.463421 | 10.326206 | -2.668335 |
| 412 | 1 | 0 | -3.491898 | 10.324317 | -1.174667 |
| 413 | 1 | 0 | -1.833716 | 11.059287 | -1.138952 |
| 414 | 1 | 0 | -3.499997 | 0.105613  | -0.106455 |
| 415 | 6 | 0 | -2.105766 | -1.424647 | 0.511785  |
| 416 | 6 | 0 | -1.762804 | 3.984632  | -4.304895 |
| 417 | 1 | 0 | -3.484363 | 3.537061  | -3.072863 |
| 418 | 1 | 0 | -2.165909 | 4.457892  | -2.251317 |
| 419 | 1 | 0 | -2.197299 | 1.287584  | -4.302254 |
| 420 | 1 | 0 | -1.854980 | 0.188017  | -2.907318 |
| 421 | 1 | 0 | -3.462350 | 1.023159  | -3.029691 |
| 422 | 1 | 0 | -1.563404 | 12.437157 | 2.698086  |
| 423 | 1 | 0 | -1.154753 | 11.185853 | 3.875696  |
| 424 | 1 | 0 | -0.078897 | 11.458608 | 2.472018  |
| 425 | 6 | 0 | -2.708814 | -2.563213 | -0.349916 |
| 426 | 6 | 0 | -2.576360 | -1.626853 | 1.951487  |
| 427 | 1 | 0 | -1.012116 | -1.467331 | 0.484369  |

|     |   |   |           |            |           |
|-----|---|---|-----------|------------|-----------|
| 428 | 1 | 0 | -2.122549 | 4.992553   | -4.625517 |
| 429 | 1 | 0 | -0.647688 | 4.013382   | -4.237060 |
| 430 | 1 | 0 | -2.046996 | 3.246675   | -5.093255 |
| 431 | 8 | 0 | -3.930586 | -2.627372  | -0.544435 |
| 432 | 7 | 0 | -1.810330 | -3.450967  | -0.833057 |
| 433 | 6 | 0 | -2.085196 | -2.965019  | 2.470144  |
| 434 | 6 | 0 | -2.082820 | -0.514551  | 2.853794  |
| 435 | 1 | 0 | -3.705866 | -1.628924  | 1.962989  |
| 436 | 1 | 0 | -0.817226 | -3.313808  | -0.626263 |
| 437 | 6 | 0 | -2.201337 | -4.687912  | -1.527363 |
| 438 | 1 | 0 | -2.341146 | -3.070474  | 3.552329  |
| 439 | 1 | 0 | -2.565521 | -3.806332  | 1.913980  |
| 440 | 1 | 0 | -0.976457 | -3.049508  | 2.356655  |
| 441 | 1 | 0 | -2.339802 | -0.742698  | 3.916775  |
| 442 | 1 | 0 | -0.973875 | -0.406046  | 2.771788  |
| 443 | 1 | 0 | -2.557526 | 0.459704   | 2.584609  |
| 444 | 6 | 0 | -1.783829 | -5.861447  | -0.605092 |
| 445 | 6 | 0 | -1.505867 | -4.902438  | -2.859942 |
| 446 | 1 | 0 | -3.287708 | -4.663933  | -1.666506 |
| 447 | 8 | 0 | -0.586631 | -6.017412  | -0.311557 |
| 448 | 7 | 0 | -2.783349 | -6.649825  | -0.146153 |
| 449 | 6 | 0 | -1.923326 | -3.941056  | -3.913756 |
| 450 | 1 | 0 | -0.389535 | -4.843582  | -2.718100 |
| 451 | 1 | 0 | -1.740410 | -5.951224  | -3.193296 |
| 452 | 1 | 0 | -3.752945 | -6.432126  | -0.393725 |
| 453 | 6 | 0 | -2.492418 | -7.703835  | 0.834168  |
| 454 | 6 | 0 | -1.338337 | -2.669322  | -3.984973 |
| 455 | 6 | 0 | -2.871943 | -4.314266  | -4.871960 |
| 456 | 6 | 0 | -3.060282 | -9.067110  | 0.382711  |
| 457 | 6 | 0 | -2.938301 | -7.397388  | 2.249516  |
| 458 | 1 | 0 | -1.399419 | -7.782285  | 0.864317  |
| 459 | 6 | 0 | -1.681547 | -1.783640  | -4.999843 |
| 460 | 1 | 0 | -0.597977 | -2.366672  | -3.226719 |
| 461 | 6 | 0 | -3.223788 | -3.444693  | -5.901148 |
| 462 | 1 | 0 | -3.346423 | -5.306129  | -4.816294 |
| 463 | 8 | 0 | -4.229041 | -9.215115  | -0.008598 |
| 464 | 7 | 0 | -2.173625 | -10.081827 | 0.479430  |
| 465 | 6 | 0 | -4.406319 | -7.079391  | 2.429336  |
| 466 | 1 | 0 | -2.668775 | -8.282167  | 2.889087  |
| 467 | 1 | 0 | -2.330976 | -6.523896  | 2.620291  |
| 468 | 6 | 0 | -2.624492 | -2.179337  | -5.962926 |
| 469 | 1 | 0 | -1.233446 | -0.781064  | -5.056637 |
| 470 | 1 | 0 | -3.970412 | -3.742313  | -6.650476 |

|     |   |   |           |            |           |
|-----|---|---|-----------|------------|-----------|
| 471 | 1 | 0 | -1.210707 | -9.870937  | 0.745024  |
| 472 | 6 | 0 | -2.534488 | -11.452707 | 0.149569  |
| 473 | 6 | 0 | -4.696365 | -6.837338  | 3.897610  |
| 474 | 1 | 0 | -4.683560 | -6.170495  | 1.831669  |
| 475 | 1 | 0 | -5.031911 | -7.928007  | 2.041516  |
| 476 | 8 | 0 | -2.904555 | -1.271947  | -6.959219 |
| 477 | 1 | 0 | -1.770680 | -12.125226 | 0.549437  |
| 478 | 1 | 0 | -3.502884 | -11.706303 | 0.592656  |
| 479 | 1 | 0 | -2.605379 | -11.602894 | -0.935630 |
| 480 | 6 | 0 | -6.160497 | -6.462430  | 4.112662  |
| 481 | 1 | 0 | -4.450994 | -7.759057  | 4.488312  |
| 482 | 1 | 0 | -4.031782 | -6.014927  | 4.277391  |
| 483 | 1 | 0 | -3.656607 | -1.609997  | -7.467088 |
| 484 | 7 | 0 | -6.488370 | -6.222699  | 5.497655  |
| 485 | 1 | 0 | -6.395873 | -5.571643  | 3.451487  |
| 486 | 1 | 0 | -6.809481 | -7.316981  | 3.759994  |
| 487 | 1 | 0 | -5.900404 | -5.516825  | 5.892676  |
| 488 | 1 | 0 | -7.445081 | -5.944346  | 5.585192  |
| 489 | 1 | 0 | 10.128676 | 4.474830   | 4.319006  |
| 490 | 7 | 0 | 9.186534  | 4.416494   | 4.706637  |
| 491 | 6 | 0 | 8.096130  | 4.188870   | 3.936658  |
| 492 | 1 | 0 | 9.037080  | 4.582137   | 5.693144  |
| 493 | 6 | 0 | 8.355916  | 4.000758   | 2.446464  |
| 494 | 8 | 0 | 6.948148  | 4.139853   | 4.403241  |
| 495 | 6 | 0 | 7.725947  | 5.148455   | 1.633647  |
| 496 | 1 | 0 | 7.895549  | 3.045939   | 2.164028  |
| 497 | 1 | 0 | 9.430874  | 3.933078   | 2.247352  |
| 498 | 6 | 0 | 7.909616  | 4.980029   | 0.112349  |
| 499 | 1 | 0 | 8.187072  | 6.100987   | 1.921759  |
| 500 | 1 | 0 | 6.657762  | 5.216755   | 1.864471  |
| 501 | 7 | 0 | 7.389741  | 6.147492   | -0.595341 |
| 502 | 6 | 0 | 7.164827  | 3.730004   | -0.393209 |
| 503 | 1 | 0 | 8.970847  | 4.901395   | -0.131186 |
| 504 | 6 | 0 | 8.176964  | 6.947399   | -1.346133 |
| 505 | 1 | 0 | 6.392964  | 6.371018   | -0.502446 |
| 506 | 8 | 0 | 5.933742  | 3.647251   | -0.267860 |
| 507 | 7 | 0 | 7.939809  | 2.774593   | -0.950996 |
| 508 | 6 | 0 | 7.468301  | 8.165822   | -1.986241 |
| 509 | 8 | 0 | 9.395094  | 6.764689   | -1.514059 |
| 510 | 1 | 0 | 8.948632  | 2.929502   | -1.020448 |
| 511 | 6 | 0 | 7.387193  | 1.521385   | -1.491539 |
| 512 | 7 | 0 | 8.128532  | 9.377141   | -1.478846 |
| 513 | 6 | 0 | 7.521395  | 8.013872   | -3.504221 |

|     |   |   |          |           |           |
|-----|---|---|----------|-----------|-----------|
| 514 | 1 | 0 | 6.421702 | 8.210512  | -1.664807 |
| 515 | 6 | 0 | 7.991281 | 0.365275  | -0.651927 |
| 516 | 6 | 0 | 7.705716 | 1.280774  | -2.965331 |
| 517 | 1 | 0 | 6.300925 | 1.559208  | -1.358279 |
| 518 | 6 | 0 | 7.458473 | 10.345890 | -0.804096 |
| 519 | 1 | 0 | 9.122762 | 9.505198  | -1.678016 |
| 520 | 6 | 0 | 6.803193 | 6.742660  | -3.915147 |
| 521 | 6 | 0 | 6.893954 | 9.205569  | -4.197574 |
| 522 | 1 | 0 | 8.602504 | 7.934898  | -3.820775 |
| 523 | 8 | 0 | 9.222381 | 0.209248  | -0.592424 |
| 524 | 7 | 0 | 7.095233 | -0.400352 | 0.008947  |
| 525 | 6 | 0 | 7.177911 | 2.412061  | -3.837981 |
| 526 | 6 | 0 | 7.099862 | -0.043475 | -3.389800 |
| 527 | 1 | 0 | 8.826536 | 1.221612  | -3.086294 |
| 528 | 6 | 0 | 8.309135 | 11.520884 | -0.344194 |
| 529 | 8 | 0 | 6.243342 | 10.301246 | -0.553107 |
| 530 | 1 | 0 | 6.791768 | 6.654216  | -5.028174 |
| 531 | 1 | 0 | 7.319241 | 5.844523  | -3.496088 |
| 532 | 1 | 0 | 5.747766 | 6.751951  | -3.547992 |
| 533 | 1 | 0 | 6.846883 | 9.024527  | -5.298875 |
| 534 | 1 | 0 | 5.855548 | 9.374711  | -3.821141 |
| 535 | 1 | 0 | 7.492055 | 10.131150 | -4.021206 |
| 536 | 1 | 0 | 6.095577 | -0.194673 | -0.088254 |
| 537 | 6 | 0 | 7.507416 | -1.489892 | 0.906324  |
| 538 | 6 | 0 | 7.674478 | 2.320036  | -5.258810 |
| 539 | 1 | 0 | 6.054939 | 2.392000  | -3.827401 |
| 540 | 1 | 0 | 7.495280 | 3.402516  | -3.415838 |
| 541 | 1 | 0 | 7.318746 | -0.245700 | -4.466874 |
| 542 | 1 | 0 | 7.531353 | -0.884645 | -2.792453 |
| 543 | 1 | 0 | 5.991765 | -0.033585 | -3.245285 |
| 544 | 1 | 0 | 7.862347 | 12.443350 | -0.729266 |
| 545 | 1 | 0 | 8.270525 | 11.568565 | 0.749518  |
| 546 | 1 | 0 | 9.348151 | 11.444492 | -0.674358 |
| 547 | 6 | 0 | 6.904873 | -2.819738 | 0.385640  |
| 548 | 6 | 0 | 7.049156 | -1.296594 | 2.350702  |
| 549 | 1 | 0 | 8.601445 | -1.532688 | 0.879041  |
| 550 | 1 | 0 | 7.358717 | 3.225728  | -5.831737 |
| 551 | 1 | 0 | 8.789795 | 2.257367  | -5.285027 |
| 552 | 1 | 0 | 7.260358 | 1.420451  | -5.774743 |
| 553 | 8 | 0 | 5.681389 | -2.942030 | 0.231580  |
| 554 | 7 | 0 | 7.807200 | -3.796483 | 0.144301  |
| 555 | 6 | 0 | 7.476567 | -2.480987 | 3.196083  |
| 556 | 6 | 0 | 7.613472 | -0.018341 | 2.935907  |

|     |   |   |          |            |           |
|-----|---|---|----------|------------|-----------|
| 557 | 1 | 0 | 5.921269 | -1.236611  | 2.364656  |
| 558 | 1 | 0 | 8.803658 | -3.597955  | 0.263676  |
| 559 | 6 | 0 | 7.425672 | -5.166675  | -0.232038 |
| 560 | 1 | 0 | 7.228423 | -2.290113  | 4.268492  |
| 561 | 1 | 0 | 6.945112 | -3.409802  | 2.874886  |
| 562 | 1 | 0 | 8.577352 | -2.652149  | 3.111432  |
| 563 | 1 | 0 | 7.337842 | 0.061737   | 4.015499  |
| 564 | 1 | 0 | 8.727558 | -0.007501  | 2.851962  |
| 565 | 1 | 0 | 7.207413 | 0.877144   | 2.406807  |
| 566 | 6 | 0 | 7.821881 | -6.073244  | 0.960665  |
| 567 | 1 | 0 | 6.342837 | -5.179639  | -0.397072 |
| 568 | 8 | 0 | 9.015539 | -6.147032  | 1.298409  |
| 569 | 7 | 0 | 6.816258 | -6.720503  | 1.591966  |
| 570 | 6 | 0 | 7.947459 | -4.886442  | -2.680450 |
| 571 | 1 | 0 | 5.848112 | -6.572297  | 1.291397  |
| 572 | 6 | 0 | 7.099527 | -7.490733  | 2.810118  |
| 573 | 6 | 0 | 8.715460 | -3.733491  | -2.897119 |
| 574 | 6 | 0 | 6.479007 | -8.904080  | 2.745985  |
| 575 | 6 | 0 | 6.705138 | -6.806578  | 4.103631  |
| 576 | 1 | 0 | 8.189606 | -7.598532  | 2.841690  |
| 577 | 6 | 0 | 8.561479 | -2.984248  | -4.057547 |
| 578 | 1 | 0 | 9.450174 | -3.415645  | -2.137886 |
| 579 | 8 | 0 | 5.299365 | -9.116309  | 2.423007  |
| 580 | 7 | 0 | 7.339614 | -9.883596  | 3.103181  |
| 581 | 6 | 0 | 5.252196 | -6.404604  | 4.223970  |
| 582 | 1 | 0 | 6.970553 | -7.499506  | 4.948528  |
| 583 | 1 | 0 | 7.345620 | -5.886588  | 4.217451  |
| 584 | 6 | 0 | 7.625297 | -3.398839  | -5.019608 |
| 585 | 1 | 0 | 9.155141 | -2.074604  | -4.230672 |
| 586 | 1 | 0 | 8.311068 | -9.635078  | 3.290926  |
| 587 | 6 | 0 | 6.935269 | -11.280658 | 3.160104  |
| 588 | 6 | 0 | 5.013750 | -5.759855  | 5.575068  |
| 589 | 1 | 0 | 4.978341 | -5.685773  | 3.406371  |
| 590 | 1 | 0 | 4.595631 | -7.307552  | 4.098830  |
| 591 | 8 | 0 | 7.522655 | -2.621734  | -6.151435 |
| 592 | 1 | 0 | 7.699507 | -11.848615 | 3.697619  |
| 593 | 1 | 0 | 5.980757 | -11.378300 | 3.687469  |
| 594 | 1 | 0 | 6.816328 | -11.708639 | 2.156311  |
| 595 | 6 | 0 | 3.554522 | -5.339979  | 5.730054  |
| 596 | 1 | 0 | 5.289400 | -6.478632  | 6.391338  |
| 597 | 1 | 0 | 5.682580 | -4.863741  | 5.683252  |
| 598 | 1 | 0 | 6.783238 | -2.959082  | -6.678103 |
| 599 | 7 | 0 | 3.270419 | -4.735939  | 7.009453  |

|     |   |   |          |           |           |
|-----|---|---|----------|-----------|-----------|
| 600 | 1 | 0 | 3.290304 | -4.659836 | 4.861747  |
| 601 | 1 | 0 | 2.903007 | -6.258503 | 5.640267  |
| 602 | 1 | 0 | 3.840945 | -3.929599 | 7.164607  |
| 603 | 1 | 0 | 2.306011 | -4.476652 | 7.065299  |
| 604 | 6 | 0 | 6.853153 | -4.550824 | -4.819034 |
| 605 | 1 | 0 | 6.118082 | -4.865256 | -5.573039 |
| 606 | 6 | 0 | 7.017555 | -5.284016 | -3.646331 |
| 607 | 1 | 0 | 6.405403 | -6.184069 | -3.481144 |
| 608 | 6 | 0 | 8.154243 | -5.699174 | -1.453712 |
| 609 | 1 | 0 | 7.792658 | -6.749979 | -1.625928 |
| 610 | 1 | 0 | 9.257592 | -5.757856 | -1.231294 |
| 611 | 1 | 0 | 5.248774 | 3.967044  | 5.023238  |
| 612 | 7 | 0 | 4.296830 | 3.847483  | 5.373382  |
| 613 | 6 | 0 | 3.228305 | 3.724223  | 4.551932  |
| 614 | 1 | 0 | 4.120766 | 3.874795  | 6.369008  |
| 615 | 6 | 0 | 3.525768 | 3.746974  | 3.057122  |
| 616 | 8 | 0 | 2.068919 | 3.606002  | 4.977210  |
| 617 | 6 | 0 | 2.911965 | 4.998077  | 2.398507  |
| 618 | 1 | 0 | 3.077090 | 2.840870  | 2.630731  |
| 619 | 1 | 0 | 4.605400 | 3.709149  | 2.877342  |
| 620 | 6 | 0 | 3.131633 | 5.042098  | 0.873360  |
| 621 | 1 | 0 | 3.365588 | 5.900348  | 2.826521  |
| 622 | 1 | 0 | 1.838847 | 5.035805  | 2.613413  |
| 623 | 7 | 0 | 2.639931 | 6.301508  | 0.321146  |
| 624 | 6 | 0 | 2.388571 | 3.884654  | 0.179747  |
| 625 | 1 | 0 | 4.197906 | 4.984041  | 0.647077  |
| 626 | 6 | 0 | 3.450481 | 7.184227  | -0.301203 |
| 627 | 1 | 0 | 1.641148 | 6.516228  | 0.413182  |
| 628 | 8 | 0 | 1.152671 | 3.805935  | 0.248411  |
| 629 | 7 | 0 | 3.171917 | 3.000055  | -0.474920 |
| 630 | 6 | 0 | 2.763470 | 8.478147  | -0.802034 |
| 631 | 8 | 0 | 4.671419 | 7.016011  | -0.460452 |
| 632 | 1 | 0 | 4.185730 | 3.140331  | -0.477912 |
| 633 | 6 | 0 | 2.621413 | 1.844586  | -1.202562 |
| 634 | 7 | 0 | 3.425419 | 9.616152  | -0.148909 |
| 635 | 6 | 0 | 2.836141 | 8.504717  | -2.326664 |
| 636 | 1 | 0 | 1.713035 | 8.495713  | -0.490893 |
| 637 | 6 | 0 | 3.198760 | 0.574451  | -0.527916 |
| 638 | 6 | 0 | 2.971420 | 1.816517  | -2.688297 |
| 639 | 1 | 0 | 1.532657 | 1.874594  | -1.089441 |
| 640 | 6 | 0 | 2.754263 | 10.491668 | 0.642091  |
| 641 | 1 | 0 | 4.421271 | 9.765343  | -0.325710 |
| 642 | 6 | 0 | 2.104416 | 7.302918  | -2.893160 |

|     |   |   |          |           |           |
|-----|---|---|----------|-----------|-----------|
| 643 | 6 | 0 | 2.236530 | 9.779719  | -2.883129 |
| 644 | 1 | 0 | 3.920373 | 8.445981  | -2.636659 |
| 645 | 8 | 0 | 4.427921 | 0.412885  | -0.450646 |
| 646 | 7 | 0 | 2.286988 | -0.284679 | -0.022602 |
| 647 | 6 | 0 | 2.411200 | 3.034863  | -3.410952 |
| 648 | 6 | 0 | 2.424100 | 0.540416  | -3.299388 |
| 649 | 1 | 0 | 4.095336 | 1.814707  | -2.794210 |
| 650 | 6 | 0 | 3.604651 | 11.597592 | 1.249646  |
| 651 | 8 | 0 | 1.538131 | 10.415407 | 0.883038  |
| 652 | 1 | 0 | 2.104241 | 7.347761  | -4.008849 |
| 653 | 1 | 0 | 2.602413 | 6.353204  | -2.579446 |
| 654 | 1 | 0 | 1.045180 | 7.284804  | -2.537252 |
| 655 | 1 | 0 | 2.201471 | 9.729214  | -3.998522 |
| 656 | 1 | 0 | 1.195879 | 9.921133  | -2.501580 |
| 657 | 1 | 0 | 2.846476 | 10.668196 | -2.593115 |
| 658 | 1 | 0 | 1.289825 | -0.062874 | -0.111152 |
| 659 | 6 | 0 | 2.683116 | -1.486982 | 0.725361  |
| 660 | 6 | 0 | 3.022273 | 3.219146  | -4.777123 |
| 661 | 1 | 0 | 1.297056 | 2.927389  | -3.505152 |
| 662 | 1 | 0 | 2.602462 | 3.962512  | -2.808645 |
| 663 | 1 | 0 | 2.579583 | 0.542554  | -4.405264 |
| 664 | 1 | 0 | 2.946289 | -0.354156 | -2.877967 |
| 665 | 1 | 0 | 1.329668 | 0.443877  | -3.094275 |
| 666 | 1 | 0 | 3.149947 | 12.561545 | 0.999172  |
| 667 | 1 | 0 | 3.577861 | 11.494656 | 2.339999  |
| 668 | 1 | 0 | 4.640612 | 11.571633 | 0.902294  |
| 669 | 6 | 0 | 2.090517 | -2.731080 | 0.016667  |
| 670 | 6 | 0 | 2.199213 | -1.495375 | 2.174530  |
| 671 | 1 | 0 | 3.777202 | -1.527632 | 0.713538  |
| 672 | 1 | 0 | 2.643538 | 4.162991  | -5.239588 |
| 673 | 1 | 0 | 4.135708 | 3.283254  | -4.706756 |
| 674 | 1 | 0 | 2.762276 | 2.370682  | -5.454890 |
| 675 | 8 | 0 | 0.868653 | -2.832916 | -0.161815 |
| 676 | 7 | 0 | 2.997594 | -3.660379 | -0.359578 |
| 677 | 6 | 0 | 2.672384 | -2.758394 | 2.868621  |
| 678 | 6 | 0 | 2.697391 | -0.279026 | 2.927629  |
| 679 | 1 | 0 | 1.069710 | -1.486445 | 2.175954  |
| 680 | 1 | 0 | 3.989188 | -3.489982 | -0.171313 |
| 681 | 6 | 0 | 2.618367 | -4.976940 | -0.897427 |
| 682 | 1 | 0 | 2.395765 | -2.723648 | 3.950330  |
| 683 | 1 | 0 | 2.196799 | -3.661939 | 2.415277  |
| 684 | 1 | 0 | 3.782316 | -2.861250 | 2.788345  |
| 685 | 1 | 0 | 2.424680 | -0.360581 | 4.007883  |



|     |   |   |           |            |           |
|-----|---|---|-----------|------------|-----------|
| 686 | 1 | 0 | 3.808669  | -0.196184  | 2.846978  |
| 687 | 1 | 0 | 2.240106  | 0.656624   | 2.524719  |
| 688 | 6 | 0 | 3.021651  | -6.021029  | 0.174598  |
| 689 | 1 | 0 | 1.534798  | -4.973707  | -1.058600 |
| 690 | 8 | 0 | 4.216913  | -6.138586  | 0.493159  |
| 691 | 7 | 0 | 2.017874  | -6.738909  | 0.728722  |
| 692 | 6 | 0 | 2.985447  | -4.515886  | -3.347154 |
| 693 | 1 | 0 | 1.049289  | -6.557390  | 0.449298  |
| 694 | 6 | 0 | 2.305225  | -7.655684  | 1.839813  |
| 695 | 6 | 0 | 3.602190  | -3.271817  | -3.538108 |
| 696 | 6 | 0 | 1.705181  | -9.056023  | 1.585584  |
| 697 | 6 | 0 | 1.892692  | -7.150146  | 3.207299  |
| 698 | 1 | 0 | 3.396757  | -7.752408  | 1.864729  |
| 699 | 6 | 0 | 3.320766  | -2.502661  | -4.661260 |
| 700 | 1 | 0 | 4.319278  | -2.897710  | -2.789272 |
| 701 | 8 | 0 | 0.527159  | -9.236915  | 1.238071  |
| 702 | 7 | 0 | 2.579528  | -10.063870 | 1.799459  |
| 703 | 6 | 0 | 0.434622  | -6.780992  | 3.366807  |
| 704 | 1 | 0 | 2.158807  | -7.945181  | 3.956784  |
| 705 | 1 | 0 | 2.522581  | -6.246900  | 3.445810  |
| 706 | 6 | 0 | 2.408149  | -2.988915  | -5.611956 |
| 707 | 1 | 0 | 3.794123  | -1.521803  | -4.812691 |
| 708 | 1 | 0 | 3.547641  | -9.834845  | 2.026937  |
| 709 | 6 | 0 | 2.191423  | -11.459376 | 1.655173  |
| 710 | 6 | 0 | 0.178970  | -6.328700  | 4.791056  |
| 711 | 1 | 0 | 0.160842  | -5.959669  | 2.652279  |
| 712 | 1 | 0 | -0.212430 | -7.663693  | 3.113555  |
| 713 | 8 | 0 | 2.190310  | -2.197347  | -6.716658 |
| 714 | 1 | 0 | 3.005693  | -12.090536 | 2.020740  |
| 715 | 1 | 0 | 1.287247  | -11.670335 | 2.236654  |
| 716 | 1 | 0 | 1.989277  | -11.712850 | 0.606855  |
| 717 | 6 | 0 | -1.282152 | -5.932411  | 4.985725  |
| 718 | 1 | 0 | 0.445300  | -7.153641  | 5.503413  |
| 719 | 1 | 0 | 0.846164  | -5.456966  | 5.030023  |
| 720 | 1 | 0 | 1.450402  | -2.576310  | -7.213441 |
| 721 | 7 | 0 | -1.580500 | -5.505151  | 6.331506  |
| 722 | 1 | 0 | -1.537842 | -5.141864  | 4.213843  |
| 723 | 1 | 0 | -1.932361 | -6.830058  | 4.767632  |
| 724 | 1 | 0 | -1.002642 | -4.736128  | 6.604510  |
| 725 | 1 | 0 | -2.542303 | -5.241277  | 6.407351  |
| 726 | 6 | 0 | 1.777169  | -4.227251  | -5.431365 |
| 727 | 1 | 0 | 1.054124  | -4.595085  | -6.172634 |
| 728 | 6 | 0 | 2.067487  | -4.979198  | -4.295888 |

|     |   |   |           |           |           |
|-----|---|---|-----------|-----------|-----------|
| 729 | 1 | 0 | 1.568240  | -5.949171 | -4.147683 |
| 730 | 6 | 0 | 3.342128  | -5.358779 | -2.176374 |
| 731 | 1 | 0 | 3.088239  | -6.433134 | -2.393906 |
| 732 | 1 | 0 | 4.455121  | -5.310261 | -2.006485 |
| 733 | 1 | 0 | 14.991128 | 4.812645  | 3.433852  |
| 734 | 7 | 0 | 14.053966 | 4.813599  | 3.831676  |
| 735 | 6 | 0 | 12.951180 | 4.509706  | 3.104395  |
| 736 | 1 | 0 | 13.920363 | 5.084943  | 4.796858  |
| 737 | 6 | 0 | 13.190533 | 4.147466  | 1.642723  |
| 738 | 8 | 0 | 11.810221 | 4.527001  | 3.587144  |
| 739 | 6 | 0 | 12.516259 | 5.170318  | 0.708385  |
| 740 | 1 | 0 | 12.753239 | 3.153132  | 1.487856  |
| 741 | 1 | 0 | 14.263181 | 4.079514  | 1.430830  |
| 742 | 6 | 0 | 12.667913 | 4.819085  | -0.786229 |
| 743 | 1 | 0 | 12.959324 | 6.161456  | 0.864622  |
| 744 | 1 | 0 | 11.452477 | 5.244122  | 0.956674  |
| 745 | 7 | 0 | 12.113961 | 5.889074  | -1.612894 |
| 746 | 6 | 0 | 11.928503 | 3.505904  | -1.109968 |
| 747 | 1 | 0 | 13.724205 | 4.724845  | -1.044107 |
| 748 | 6 | 0 | 12.869770 | 6.604635  | -2.472971 |
| 749 | 1 | 0 | 11.117575 | 6.114822  | -1.517153 |
| 750 | 8 | 0 | 10.697655 | 3.443566  | -0.983368 |
| 751 | 7 | 0 | 12.707372 | 2.472781  | -1.504035 |
| 752 | 6 | 0 | 12.129688 | 7.738910  | -3.225732 |
| 753 | 8 | 0 | 14.084197 | 6.407755  | -2.660872 |
| 754 | 1 | 0 | 13.712713 | 2.623573  | -1.606979 |
| 755 | 6 | 0 | 12.154420 | 1.157096  | -1.879361 |
| 756 | 7 | 0 | 12.789253 | 9.012258  | -2.896759 |
| 757 | 6 | 0 | 12.125443 | 7.402769  | -4.714584 |
| 758 | 1 | 0 | 11.095717 | 7.816350  | -2.871344 |
| 759 | 6 | 0 | 12.790331 | 0.106834  | -0.930663 |
| 760 | 6 | 0 | 12.446845 | 0.747349  | -3.320573 |
| 761 | 1 | 0 | 11.070900 | 1.204656  | -1.727411 |
| 762 | 6 | 0 | 12.125122 | 10.045200 | -2.312671 |
| 763 | 1 | 0 | 13.758362 | 9.153251  | -3.183904 |
| 764 | 6 | 0 | 11.484548 | 8.508390  | -5.527810 |
| 765 | 1 | 0 | 13.193556 | 7.270698  | -5.056357 |
| 766 | 8 | 0 | 14.023659 | -0.045631 | -0.903229 |
| 767 | 7 | 0 | 11.922870 | -0.577541 | -0.150967 |
| 768 | 6 | 0 | 11.837839 | 1.728339  | -4.313787 |
| 769 | 6 | 0 | 11.906921 | -0.650357 | -3.558475 |
| 770 | 1 | 0 | 13.566169 | 0.729151  | -3.466736 |
| 771 | 6 | 0 | 12.957622 | 11.290356 | -2.047109 |

|     |   |   |           |           |           |
|-----|---|---|-----------|-----------|-----------|
| 772 | 8 | 0 | 10.927965 | 9.999689  | -1.991454 |
| 773 | 1 | 0 | 11.385762 | 8.188930  | -6.593717 |
| 774 | 1 | 0 | 10.466463 | 8.744799  | -5.132682 |
| 775 | 1 | 0 | 12.103353 | 9.436765  | -5.498347 |
| 776 | 1 | 0 | 10.919952 | -0.379164 | -0.225937 |
| 777 | 6 | 0 | 12.384350 | -1.533753 | 0.866314  |
| 778 | 6 | 0 | 12.411663 | 1.562587  | -5.698544 |
| 779 | 1 | 0 | 10.724962 | 1.579203  | -4.343496 |
| 780 | 1 | 0 | 12.019044 | 2.783681  | -3.977734 |
| 781 | 1 | 0 | 12.041040 | -0.942415 | -4.628596 |
| 782 | 1 | 0 | 12.454940 | -1.396194 | -2.930308 |
| 783 | 1 | 0 | 10.818581 | -0.700963 | -3.309172 |
| 784 | 1 | 0 | 12.439457 | 12.150266 | -2.483397 |
| 785 | 1 | 0 | 13.002990 | 11.449752 | -0.964069 |
| 786 | 1 | 0 | 13.969523 | 11.219423 | -2.452600 |
| 787 | 6 | 0 | 11.761188 | -2.924931 | 0.581323  |
| 788 | 6 | 0 | 12.016163 | -1.131920 | 2.294187  |
| 789 | 1 | 0 | 13.474816 | -1.585603 | 0.781625  |
| 790 | 1 | 0 | 11.999059 | 2.346764  | -6.378788 |
| 791 | 1 | 0 | 13.524719 | 1.661335  | -5.679552 |
| 792 | 1 | 0 | 12.156717 | 0.562177  | -6.124218 |
| 793 | 8 | 0 | 10.537227 | -3.056355 | 0.446138  |
| 794 | 7 | 0 | 12.651434 | -3.942891 | 0.528298  |
| 795 | 6 | 0 | 12.513202 | -2.177227 | 3.274336  |
| 796 | 6 | 0 | 12.601798 | 0.219886  | 2.648461  |
| 797 | 1 | 0 | 10.891326 | -1.072018 | 2.372566  |
| 798 | 1 | 0 | 13.650608 | -3.730242 | 0.561612  |
| 799 | 6 | 0 | 12.258970 | -5.352900 | 0.368240  |
| 800 | 1 | 0 | 12.356578 | -1.822756 | 4.322154  |
| 801 | 1 | 0 | 11.958518 | -3.138138 | 3.145604  |
| 802 | 1 | 0 | 13.603657 | -2.370637 | 3.125393  |
| 803 | 1 | 0 | 12.398557 | 0.454521  | 3.721590  |
| 804 | 1 | 0 | 13.707720 | 0.222383  | 2.487551  |
| 805 | 1 | 0 | 12.148594 | 1.027772  | 2.025112  |
| 806 | 6 | 0 | 12.642125 | -6.084640 | 1.682522  |
| 807 | 1 | 0 | 11.175928 | -5.379007 | 0.203930  |
| 808 | 8 | 0 | 13.839049 | -6.167569 | 2.010723  |
| 809 | 7 | 0 | 11.621045 | -6.581368 | 2.417978  |
| 810 | 6 | 0 | 12.856150 | -5.406073 | -2.081585 |
| 811 | 1 | 0 | 10.653764 | -6.452156 | 2.104648  |
| 812 | 6 | 0 | 11.892601 | -7.192371 | 3.725557  |
| 813 | 6 | 0 | 13.703547 | -4.340386 | -2.418248 |
| 814 | 6 | 0 | 11.243769 | -8.591476 | 3.841387  |

|     |   |   |           |            |           |
|-----|---|---|-----------|------------|-----------|
| 815 | 6 | 0 | 11.518211 | -6.340986  | 4.922278  |
| 816 | 1 | 0 | 12.979504 | -7.318806  | 3.766799  |
| 817 | 6 | 0 | 13.619762 | -3.731919  | -3.664882 |
| 818 | 1 | 0 | 14.445749 | -3.977659  | -1.685729 |
| 819 | 8 | 0 | 10.058173 | -8.819907  | 3.556407  |
| 820 | 7 | 0 | 12.087549 | -9.542407  | 4.302036  |
| 821 | 6 | 0 | 10.072885 | -5.901031  | 4.988162  |
| 822 | 1 | 0 | 11.770328 | -6.928221  | 5.847616  |
| 823 | 1 | 0 | 12.177487 | -5.427362  | 4.924601  |
| 824 | 6 | 0 | 12.674773 | -4.201683  | -4.592587 |
| 825 | 1 | 0 | 14.278983 | -2.893073  | -3.933777 |
| 826 | 1 | 0 | 13.060230 | -9.291732  | 4.471502  |
| 827 | 6 | 0 | 11.652254 | -10.915375 | 4.515334  |
| 828 | 6 | 0 | 9.844535  | -5.083008  | 6.243495  |
| 829 | 1 | 0 | 9.809814  | -5.290363  | 4.083713  |
| 830 | 1 | 0 | 9.401755  | -6.802193  | 4.979986  |
| 831 | 8 | 0 | 12.637760 | -3.560565  | -5.810082 |
| 832 | 1 | 0 | 12.481379 | -11.484933 | 4.943275  |
| 833 | 1 | 0 | 10.801070 | -10.952784 | 5.204777  |
| 834 | 1 | 0 | 11.348673 | -11.386289 | 3.572594  |
| 835 | 6 | 0 | 8.385733  | -4.646228  | 6.349698  |
| 836 | 1 | 0 | 10.124609 | -5.687527  | 7.146314  |
| 837 | 1 | 0 | 10.514275 | -4.181409  | 6.228264  |
| 838 | 1 | 0 | 11.900539 | -3.929134  | -6.318497 |
| 839 | 7 | 0 | 8.110331  | -3.871747  | 7.535625  |
| 840 | 1 | 0 | 8.114389  | -4.092822  | 5.397620  |
| 841 | 1 | 0 | 7.735197  | -5.568909  | 6.391763  |
| 842 | 1 | 0 | 8.673477  | -3.046241  | 7.568722  |
| 843 | 1 | 0 | 7.143732  | -3.616756  | 7.568266  |
| 844 | 6 | 0 | 11.827474 | -5.271399  | -4.273900 |
| 845 | 1 | 0 | 11.088422 | -5.631188  | -5.003270 |
| 846 | 6 | 0 | 11.922407 | -5.863159  | -3.016678 |
| 847 | 1 | 0 | 11.250987 | -6.696877  | -2.759472 |
| 848 | 6 | 0 | 12.984949 | -6.069302  | -0.757978 |
| 849 | 1 | 0 | 12.571273 | -7.113469  | -0.810845 |
| 850 | 1 | 0 | 14.078507 | -6.155740  | -0.496412 |
| 851 | 6 | 0 | 11.381246 | 6.100253   | -4.940074 |
| 852 | 1 | 0 | 11.906844 | 5.252791   | -4.436088 |
| 853 | 1 | 0 | 10.341560 | 6.167023   | -4.535448 |
| 854 | 1 | 0 | 11.324281 | 5.878220   | -6.032883 |
| 855 | 1 | 0 | 19.909523 | 4.838023   | 2.569726  |
| 856 | 7 | 0 | 18.986219 | 4.922766   | 2.967870  |
| 857 | 6 | 0 | 17.862074 | 4.639258   | 2.249927  |

|     |   |   |           |           |           |
|-----|---|---|-----------|-----------|-----------|
| 858 | 1 | 0 | 18.886916 | 5.260978  | 3.916089  |
| 859 | 6 | 0 | 18.078015 | 4.154644  | 0.820801  |
| 860 | 8 | 0 | 16.734260 | 4.766134  | 2.733126  |
| 861 | 6 | 0 | 17.387830 | 5.094118  | -0.186594 |
| 862 | 1 | 0 | 17.641631 | 3.148642  | 0.767939  |
| 863 | 1 | 0 | 19.146636 | 4.059624  | 0.591981  |
| 864 | 6 | 0 | 17.458422 | 4.596423  | -1.647428 |
| 865 | 1 | 0 | 17.855927 | 6.084894  | -0.152803 |
| 866 | 1 | 0 | 16.337367 | 5.215309  | 0.095618  |
| 867 | 7 | 0 | 16.842879 | 5.559328  | -2.549919 |
| 868 | 6 | 0 | 16.709994 | 3.262364  | -1.793845 |
| 869 | 1 | 0 | 18.505036 | 4.498642  | -1.953531 |
| 870 | 6 | 0 | 17.587987 | 6.380626  | -3.333922 |
| 871 | 1 | 0 | 15.824005 | 5.670868  | -2.534280 |
| 872 | 8 | 0 | 15.482083 | 3.226969  | -1.639843 |
| 873 | 7 | 0 | 17.464048 | 2.176698  | -2.077683 |
| 874 | 6 | 0 | 16.767528 | 7.330304  | -4.241468 |
| 875 | 8 | 0 | 18.824146 | 6.402375  | -3.342016 |
| 876 | 1 | 0 | 18.472583 | 2.262249  | -2.119389 |
| 877 | 6 | 0 | 16.914595 | 0.810975  | -2.155529 |
| 878 | 7 | 0 | 17.428304 | 8.640699  | -4.180706 |
| 879 | 6 | 0 | 16.681911 | 6.730618  | -5.643308 |
| 880 | 1 | 0 | 15.752160 | 7.455139  | -3.850753 |
| 881 | 6 | 0 | 17.591755 | 0.001498  | -1.014803 |
| 882 | 6 | 0 | 17.168455 | 0.118227  | -3.491191 |
| 883 | 1 | 0 | 15.834922 | 0.884605  | -1.988711 |
| 884 | 6 | 0 | 16.782577 | 9.786428  | -3.840941 |
| 885 | 1 | 0 | 18.438996 | 8.630082  | -4.247416 |
| 886 | 6 | 0 | 15.909724 | 5.425171  | -5.592125 |
| 887 | 6 | 0 | 16.010754 | 7.688115  | -6.607611 |
| 888 | 1 | 0 | 17.725296 | 6.520159  | -6.014566 |
| 889 | 8 | 0 | 18.805265 | 0.108988  | -0.807194 |
| 890 | 7 | 0 | 16.750631 | -0.789729 | -0.295010 |
| 891 | 6 | 0 | 16.513249 | 0.873239  | -4.642368 |
| 892 | 6 | 0 | 16.633731 | -1.300884 | -3.423345 |
| 893 | 1 | 0 | 18.280329 | 0.077085  | -3.674015 |
| 894 | 6 | 0 | 17.657023 | 11.026655 | -3.725824 |
| 895 | 8 | 0 | 15.562234 | 9.845736  | -3.635103 |
| 896 | 1 | 0 | 15.646715 | 5.095606  | -6.626246 |
| 897 | 1 | 0 | 16.521736 | 4.620830  | -5.117633 |
| 898 | 1 | 0 | 14.965244 | 5.548788  | -5.004818 |
| 899 | 1 | 0 | 15.852022 | 7.187792  | -7.593754 |
| 900 | 1 | 0 | 15.018750 | 8.013171  | -6.209379 |

|     |   |   |           |           |           |
|-----|---|---|-----------|-----------|-----------|
| 901 | 1 | 0 | 16.640244 | 8.594091  | -6.775962 |
| 902 | 1 | 0 | 15.741255 | -0.707157 | -0.443130 |
| 903 | 6 | 0 | 17.236662 | -1.570043 | 0.847115  |
| 904 | 6 | 0 | 17.117304 | 0.505512  | -5.974395 |
| 905 | 1 | 0 | 15.412684 | 0.648854  | -4.651012 |
| 906 | 1 | 0 | 16.619158 | 1.980607  | -4.497275 |
| 907 | 1 | 0 | 16.602396 | -1.751761 | -4.444566 |
| 908 | 1 | 0 | 17.289835 | -1.937201 | -2.781981 |
| 909 | 1 | 0 | 15.598650 | -1.311090 | -2.998835 |
| 910 | 1 | 0 | 17.288058 | 11.779681 | -4.429319 |
| 911 | 1 | 0 | 17.550564 | 11.436972 | -2.716602 |
| 912 | 1 | 0 | 18.715257 | 10.834544 | -3.927439 |
| 913 | 6 | 0 | 16.609585 | -2.984276 | 0.773642  |
| 914 | 6 | 0 | 16.903991 | -0.978250 | 2.219719  |
| 915 | 1 | 0 | 18.327825 | -1.614052 | 0.744612  |
| 916 | 1 | 0 | 16.612945 | 1.075559  | -6.792099 |
| 917 | 1 | 0 | 18.207166 | 0.749337  | -5.995389 |
| 918 | 1 | 0 | 16.998963 | -0.584952 | -6.184033 |
| 919 | 8 | 0 | 15.408846 | -3.130278 | 0.513580  |
| 920 | 7 | 0 | 17.457596 | -4.012118 | 1.025084  |
| 921 | 6 | 0 | 17.724552 | -1.659972 | 3.297931  |
| 922 | 6 | 0 | 17.160043 | 0.515975  | 2.253570  |
| 923 | 1 | 0 | 15.808906 | -1.155042 | 2.429711  |
| 924 | 1 | 0 | 18.387677 | -3.794982 | 1.368152  |
| 925 | 6 | 0 | 17.000953 | -5.384513 | 1.291864  |
| 926 | 1 | 0 | 17.514075 | -1.186836 | 4.288024  |
| 927 | 1 | 0 | 17.478734 | -2.746619 | 3.377944  |
| 928 | 1 | 0 | 18.816529 | -1.557737 | 3.086357  |
| 929 | 1 | 0 | 17.153966 | 0.882941  | 3.308485  |
| 930 | 1 | 0 | 18.151882 | 0.753732  | 1.796432  |
| 931 | 1 | 0 | 16.367391 | 1.066109  | 1.690690  |
| 932 | 6 | 0 | 17.291367 | -5.682445 | 2.788559  |
| 933 | 1 | 0 | 15.928884 | -5.435751 | 1.073484  |
| 934 | 8 | 0 | 18.327549 | -5.259411 | 3.311072  |
| 935 | 7 | 0 | 16.390455 | -6.479620 | 3.427680  |
| 936 | 6 | 0 | 17.676671 | -6.263966 | -0.973719 |
| 937 | 1 | 0 | 15.442611 | -6.568038 | 3.050486  |
| 938 | 6 | 0 | 16.648473 | -6.845144 | 4.823429  |
| 939 | 6 | 0 | 18.650699 | -5.500743 | -1.632082 |
| 940 | 6 | 0 | 15.906801 | -8.151028 | 5.181421  |
| 941 | 6 | 0 | 16.331505 | -5.774565 | 5.852702  |
| 942 | 1 | 0 | 17.731156 | -7.021087 | 4.892725  |
| 943 | 6 | 0 | 18.626497 | -5.350450 | -3.013371 |

|     |   |   |           |            |           |
|-----|---|---|-----------|------------|-----------|
| 944 | 1 | 0 | 19.445691 | -5.012253  | -1.047739 |
| 945 | 8 | 0 | 14.802334 | -8.451569  | 4.713793  |
| 946 | 7 | 0 | 16.552811 | -8.932029  | 6.084246  |
| 947 | 6 | 0 | 14.889700 | -5.317319  | 5.857142  |
| 948 | 1 | 0 | 16.600121 | -6.173511  | 6.867675  |
| 949 | 1 | 0 | 16.999581 | -4.891067  | 5.654515  |
| 950 | 6 | 0 | 17.607939 | -5.978861  | -3.749631 |
| 951 | 1 | 0 | 19.386004 | -4.753397  | -3.536914 |
| 952 | 1 | 0 | 17.476562 | -8.655298  | 6.387248  |
| 953 | 6 | 0 | 15.979764 | -10.166301 | 6.610042  |
| 954 | 6 | 0 | 14.655895 | -4.328290  | 6.979838  |
| 955 | 1 | 0 | 14.634254 | -4.840596  | 4.873494  |
| 956 | 1 | 0 | 14.209551 | -6.204111  | 5.975023  |
| 957 | 8 | 0 | 17.637086 | -5.800879  | -5.113397 |
| 958 | 1 | 0 | 16.532530 | -10.461656 | 7.505590  |
| 959 | 1 | 0 | 14.930568 | -10.006642 | 6.875811  |
| 960 | 1 | 0 | 16.033407 | -10.978010 | 5.874455  |
| 961 | 6 | 0 | 13.199795 | -3.866950  | 6.988785  |
| 962 | 1 | 0 | 14.908135 | -4.804157  | 7.963753  |
| 963 | 1 | 0 | 15.337019 | -3.446478  | 6.851117  |
| 964 | 1 | 0 | 16.858379 | -6.237897  | -5.488048 |
| 965 | 7 | 0 | 12.899147 | -2.963284  | 8.072190  |
| 966 | 1 | 0 | 12.966309 | -3.421622  | 5.972649  |
| 967 | 1 | 0 | 12.533901 | -4.771752  | 7.108912  |
| 968 | 1 | 0 | 13.487800 | -2.155469  | 8.045276  |
| 969 | 1 | 0 | 11.940858 | -2.679679  | 8.034239  |
| 970 | 6 | 0 | 16.628336 | -6.747977  | -3.106412 |
| 971 | 1 | 0 | 15.833312 | -7.233978  | -3.689019 |
| 972 | 6 | 0 | 16.669242 | -6.882565  | -1.721168 |
| 973 | 1 | 0 | 15.899583 | -7.483071  | -1.211840 |
| 974 | 6 | 0 | 17.742659 | -6.449393  | 0.499102  |
| 975 | 1 | 0 | 17.290689 | -7.442048  | 0.775236  |
| 976 | 1 | 0 | 18.820702 | -6.471251  | 0.821644  |

P Pl (Ac-VQIVYK-NHMe)<sub>9</sub>

|    |   |   |            |           |           |
|----|---|---|------------|-----------|-----------|
| 1  | 6 | 0 | -18.204497 | 9.874521  | 6.831687  |
| 2  | 6 | 0 | -18.902166 | 9.271580  | 5.619167  |
| 3  | 1 | 0 | -18.744873 | 10.780228 | 7.126835  |
| 4  | 1 | 0 | -18.277053 | 9.163946  | 7.661710  |
| 5  | 1 | 0 | -17.154794 | 10.114358 | 6.640663  |
| 6  | 8 | 0 | -20.089817 | 8.933542  | 5.648182  |
| 7  | 7 | 0 | -18.112318 | 9.143040  | 4.510694  |
| 8  | 1 | 0 | -17.120557 | 9.384294  | 4.554637  |
| 9  | 6 | 0 | -18.637247 | 8.536307  | 3.283293  |
| 10 | 6 | 0 | -18.083043 | 7.093579  | 3.201987  |
| 11 | 6 | 0 | -18.255428 | 9.275866  | 2.006391  |
| 12 | 1 | 0 | -19.729165 | 8.528556  | 3.389269  |
| 13 | 8 | 0 | -16.872112 | 6.895651  | 3.021028  |
| 14 | 7 | 0 | -18.980156 | 6.097945  | 3.389507  |
| 15 | 6 | 0 | -18.927198 | 8.617802  | 0.816336  |
| 16 | 6 | 0 | -18.639673 | 10.739217 | 2.074767  |
| 17 | 1 | 0 | -17.135849 | 9.200720  | 1.872575  |
| 18 | 1 | 0 | -19.956829 | 6.331411  | 3.524703  |
| 19 | 6 | 0 | -18.619174 | 4.680630  | 3.395372  |
| 20 | 1 | 0 | -18.615241 | 9.129023  | -0.126060 |
| 21 | 1 | 0 | -18.637467 | 7.540919  | 0.746555  |
| 22 | 1 | 0 | -20.038521 | 8.684346  | 0.902879  |
| 23 | 1 | 0 | -18.479699 | 11.220658 | 1.079430  |
| 24 | 1 | 0 | -19.714884 | 10.851609 | 2.354212  |
| 25 | 1 | 0 | -18.017118 | 11.278622 | 2.828266  |
| 26 | 6 | 0 | -19.328461 | 3.989303  | 2.213245  |
| 27 | 6 | 0 | -19.014909 | 4.021879  | 4.733705  |
| 28 | 1 | 0 | -17.536521 | 4.635960  | 3.260640  |
| 29 | 8 | 0 | -20.544545 | 4.105303  | 2.042133  |
| 30 | 7 | 0 | -18.508154 | 3.235015  | 1.426202  |
| 31 | 6 | 0 | -18.480704 | 2.585472  | 4.877487  |
| 32 | 1 | 0 | -18.610895 | 4.644246  | 5.542050  |
| 33 | 1 | 0 | -20.105570 | 4.013599  | 4.837442  |
| 34 | 1 | 0 | -17.495723 | 3.306223  | 1.549737  |
| 35 | 6 | 0 | -19.007774 | 2.522917  | 0.242439  |
| 36 | 6 | 0 | -18.901048 | 1.981034  | 6.219932  |
| 37 | 1 | 0 | -18.909621 | 1.946811  | 4.095092  |
| 38 | 1 | 0 | -17.390795 | 2.565012  | 4.765065  |
| 39 | 6 | 0 | -18.401929 | 1.101547  | 0.291129  |
| 40 | 6 | 0 | -18.631100 | 3.175931  | -1.087679 |
| 41 | 1 | 0 | -20.101019 | 2.500705  | 0.329031  |



|    |   |   |            |           |           |
|----|---|---|------------|-----------|-----------|
| 42 | 8 | 0 | -20.085409 | 1.888386  | 6.549111  |
| 43 | 7 | 0 | -17.873674 | 1.549296  | 7.008148  |
| 44 | 8 | 0 | -17.173599 | 0.949216  | 0.332265  |
| 45 | 7 | 0 | -19.280498 | 0.069359  | 0.300346  |
| 46 | 6 | 0 | -19.428539 | 4.457550  | -1.296577 |
| 47 | 6 | 0 | -18.863101 | 2.210089  | -2.232157 |
| 48 | 1 | 0 | -17.530382 | 3.429323  | -1.064812 |
| 49 | 1 | 0 | -18.116726 | 1.188471  | 7.920743  |
| 50 | 1 | 0 | -16.895600 | 1.700157  | 6.768685  |
| 51 | 1 | 0 | -20.276596 | 0.253043  | 0.278128  |
| 52 | 6 | 0 | -18.857715 | -1.342348 | 0.361881  |
| 53 | 6 | 0 | -18.747302 | 5.394170  | -2.261425 |
| 54 | 1 | 0 | -20.451664 | 4.198036  | -1.677953 |
| 55 | 1 | 0 | -19.571874 | 4.983119  | -0.314204 |
| 56 | 1 | 0 | -18.740393 | 2.736931  | -3.209643 |
| 57 | 1 | 0 | -18.122301 | 1.373174  | -2.190689 |
| 58 | 1 | 0 | -19.893381 | 1.779425  | -2.193233 |
| 59 | 6 | 0 | -19.558644 | -2.080861 | -0.808495 |
| 60 | 6 | 0 | -19.223668 | -2.040215 | 1.668288  |
| 61 | 1 | 0 | -17.770238 | -1.351494 | 0.238851  |
| 62 | 1 | 0 | -19.345496 | 6.330845  | -2.372592 |
| 63 | 1 | 0 | -17.727852 | 5.667480  | -1.893992 |
| 64 | 1 | 0 | -18.640733 | 4.924278  | -3.269000 |
| 65 | 8 | 0 | -20.787526 | -2.070301 | -0.914314 |
| 66 | 7 | 0 | -18.710701 | -2.707065 | -1.674082 |
| 67 | 6 | 0 | -18.699086 | -3.463440 | 1.645711  |
| 68 | 6 | 0 | -18.660029 | -1.304243 | 2.866565  |
| 69 | 1 | 0 | -20.347688 | -2.073320 | 1.757574  |
| 70 | 1 | 0 | -17.702158 | -2.643746 | -1.521924 |
| 71 | 6 | 0 | -19.205053 | -3.464203 | -2.819477 |
| 72 | 1 | 0 | -18.925920 | -3.966950 | 2.616123  |
| 73 | 1 | 0 | -19.179708 | -4.047293 | 0.824182  |
| 74 | 1 | 0 | -17.592585 | -3.471182 | 1.489121  |
| 75 | 1 | 0 | -18.833790 | -1.899868 | 3.795519  |
| 76 | 1 | 0 | -17.560747 | -1.143940 | 2.746698  |
| 77 | 1 | 0 | -19.151208 | -0.309885 | 2.996422  |
| 78 | 6 | 0 | -18.588821 | -4.887884 | -2.819211 |
| 79 | 6 | 0 | -18.907425 | -2.843515 | -4.182255 |
| 80 | 1 | 0 | -20.294396 | -3.530773 | -2.697532 |
| 81 | 8 | 0 | -17.464087 | -5.115512 | -2.355636 |
| 82 | 7 | 0 | -19.374044 | -5.837790 | -3.388201 |
| 83 | 6 | 0 | -19.935412 | -1.846618 | -4.586476 |
| 84 | 1 | 0 | -17.887751 | -2.365756 | -4.183946 |

|     |   |   |            |            |           |
|-----|---|---|------------|------------|-----------|
| 85  | 1 | 0 | -18.878414 | -3.659486  | -4.957197 |
| 86  | 1 | 0 | -20.207555 | -5.536738  | -3.883053 |
| 87  | 6 | 0 | -18.863802 | -7.160897  | -3.772981 |
| 88  | 6 | 0 | -19.759169 | -0.485162  | -4.311414 |
| 89  | 6 | 0 | -21.083290 | -2.265598  | -5.269895 |
| 90  | 6 | 0 | -18.731440 | -7.201045  | -5.321017 |
| 91  | 6 | 0 | -19.731320 | -8.313908  | -3.311009 |
| 92  | 1 | 0 | -17.875983 | -7.273687  | -3.310487 |
| 93  | 6 | 0 | -20.706689 | 0.451545   | -4.709932 |
| 94  | 1 | 0 | -18.864603 | -0.146648  | -3.763544 |
| 95  | 6 | 0 | -22.043746 | -1.344605  | -5.677613 |
| 96  | 1 | 0 | -21.228280 | -3.334453  | -5.491859 |
| 97  | 8 | 0 | -19.548523 | -6.617786  | -6.041857 |
| 98  | 7 | 0 | -17.681421 | -7.933220  | -5.767801 |
| 99  | 6 | 0 | -21.177544 | -8.211221  | -3.747199 |
| 100 | 1 | 0 | -19.279904 | -9.260075  | -3.715893 |
| 101 | 1 | 0 | -19.685315 | -8.376944  | -2.189344 |
| 102 | 6 | 0 | -21.851623 | 0.015431   | -5.395811 |
| 103 | 1 | 0 | -20.574989 | 1.520607   | -4.488869 |
| 104 | 1 | 0 | -22.944241 | -1.679376  | -6.210799 |
| 105 | 1 | 0 | -16.985391 | -8.240901  | -5.088308 |
| 106 | 6 | 0 | -17.412480 | -8.114262  | -7.185859 |
| 107 | 6 | 0 | -21.907546 | -9.514823  | -3.503177 |
| 108 | 1 | 0 | -21.687820 | -7.386894  | -3.182150 |
| 109 | 1 | 0 | -21.225233 | -7.945726  | -4.837951 |
| 110 | 8 | 0 | -22.749321 | 0.987052   | -5.775674 |
| 111 | 1 | 0 | -17.205978 | -9.168885  | -7.403801 |
| 112 | 1 | 0 | -18.292597 | -7.794423  | -7.747688 |
| 113 | 1 | 0 | -16.552360 | -7.513834  | -7.511267 |
| 114 | 6 | 0 | -23.373629 | -9.380188  | -3.911998 |
| 115 | 1 | 0 | -21.423029 | -10.337609 | -4.091383 |
| 116 | 1 | 0 | -21.834392 | -9.790726  | -2.418515 |
| 117 | 1 | 0 | -23.512382 | 0.546432   | -6.176623 |
| 118 | 7 | 0 | -24.127161 | -10.601332 | -3.751939 |
| 119 | 1 | 0 | -23.819748 | -8.518235  | -3.330063 |
| 120 | 1 | 0 | -23.420774 | -9.098725  | -5.003203 |
| 121 | 1 | 0 | -24.005710 | -10.982371 | -2.834874 |
| 122 | 1 | 0 | -25.100045 | -10.431343 | -3.910676 |
| 123 | 1 | 0 | -15.169172 | 6.269179   | 2.963892  |
| 124 | 7 | 0 | -14.165339 | 6.066900   | 2.914241  |
| 125 | 6 | 0 | -13.296081 | 7.088489   | 2.759948  |
| 126 | 6 | 0 | -13.733826 | 4.673511   | 3.022221  |
| 127 | 6 | 0 | -13.924112 | 8.503256   | 2.704672  |

|     |   |   |            |           |           |
|-----|---|---|------------|-----------|-----------|
| 128 | 8 | 0 | -12.064098 | 6.949483  | 2.682405  |
| 129 | 6 | 0 | -14.466480 | 3.853228  | 1.943023  |
| 130 | 6 | 0 | -14.041539 | 4.113706  | 4.425391  |
| 131 | 1 | 0 | -12.658059 | 4.654035  | 2.837079  |
| 132 | 7 | 0 | -13.320055 | 9.301181  | 3.781341  |
| 133 | 6 | 0 | -13.703351 | 9.072607  | 1.304733  |
| 134 | 1 | 0 | -14.999856 | 8.452381  | 2.904839  |
| 135 | 8 | 0 | -15.701262 | 3.750351  | 1.964904  |
| 136 | 7 | 0 | -13.670767 | 3.270570  | 1.015150  |
| 137 | 6 | 0 | -13.542934 | 2.668144  | 4.611918  |
| 138 | 1 | 0 | -13.561359 | 4.770107  | 5.161382  |
| 139 | 1 | 0 | -15.121435 | 4.151455  | 4.602087  |
| 140 | 1 | 0 | -12.307733 | 9.443938  | 3.772308  |
| 141 | 6 | 0 | -14.063476 | 9.914064  | 4.737917  |
| 142 | 6 | 0 | -14.405064 | 8.197668  | 0.283835  |
| 143 | 6 | 0 | -14.212930 | 10.495418 | 1.201938  |
| 144 | 1 | 0 | -12.595708 | 9.067338  | 1.084458  |
| 145 | 1 | 0 | -12.659533 | 3.419098  | 1.061664  |
| 146 | 6 | 0 | -14.219805 | 2.498183  | -0.111804 |
| 147 | 6 | 0 | -13.917685 | 2.138081  | 5.992299  |
| 148 | 1 | 0 | -14.029605 | 2.011016  | 3.880488  |
| 149 | 1 | 0 | -12.460098 | 2.610461  | 4.458126  |
| 150 | 6 | 0 | -13.268864 | 10.684729 | 5.782046  |
| 151 | 8 | 0 | -15.302541 | 9.854866  | 4.795141  |
| 152 | 1 | 0 | -14.310297 | 8.646108  | -0.734320 |
| 153 | 1 | 0 | -13.951265 | 7.176911  | 0.261589  |
| 154 | 1 | 0 | -15.490803 | 8.099110  | 0.531160  |
| 155 | 1 | 0 | -14.157574 | 10.844989 | 0.142419  |
| 156 | 1 | 0 | -15.276000 | 10.556579 | 1.541029  |
| 157 | 1 | 0 | -13.599006 | 11.185076 | 1.829071  |
| 158 | 6 | 0 | -13.605985 | 1.076870  | -0.033199 |
| 159 | 6 | 0 | -13.913093 | 3.088112  | -1.486641 |
| 160 | 1 | 0 | -15.304990 | 2.454906  | 0.028641  |
| 161 | 8 | 0 | -15.099932 | 1.983744  | 6.327506  |
| 162 | 7 | 0 | -12.879863 | 1.853722  | 6.817309  |
| 163 | 1 | 0 | -13.668573 | 11.702383 | 5.839181  |
| 164 | 1 | 0 | -13.432427 | 10.211981 | 6.756853  |
| 165 | 1 | 0 | -12.198960 | 10.713625 | 5.561193  |
| 166 | 8 | 0 | -12.375455 | 0.923550  | -0.107751 |
| 167 | 7 | 0 | -14.488400 | 0.068871  | 0.144277  |
| 168 | 6 | 0 | -14.445601 | 4.509378  | -1.617284 |
| 169 | 6 | 0 | -14.524315 | 2.198932  | -2.552900 |
| 170 | 1 | 0 | -12.792961 | 3.105635  | -1.626738 |

|     |   |   |            |           |           |
|-----|---|---|------------|-----------|-----------|
| 171 | 1 | 0 | -13.100064 | 1.536928  | 7.752084  |
| 172 | 1 | 0 | -11.908830 | 2.013647  | 6.546942  |
| 173 | 1 | 0 | -15.485597 | 0.286895  | 0.224926  |
| 174 | 6 | 0 | -14.060549 | -1.328253 | 0.312937  |
| 175 | 6 | 0 | -13.876972 | 5.223493  | -2.817728 |
| 176 | 1 | 0 | -15.566182 | 4.479456  | -1.688763 |
| 177 | 1 | 0 | -14.190433 | 5.103597  | -0.699890 |
| 178 | 1 | 0 | -14.367521 | 2.648194  | -3.563314 |
| 179 | 1 | 0 | -14.050940 | 1.186234  | -2.543767 |
| 180 | 1 | 0 | -15.623406 | 2.079936  | -2.385221 |
| 181 | 6 | 0 | -14.713535 | -2.187968 | -0.800678 |
| 182 | 6 | 0 | -14.451562 | -1.931585 | 1.660960  |
| 183 | 1 | 0 | -12.970328 | -1.346030 | 0.214692  |
| 184 | 1 | 0 | -14.203873 | 6.291936  | -2.814817 |
| 185 | 1 | 0 | -12.759855 | 5.196936  | -2.800989 |
| 186 | 1 | 0 | -14.224651 | 4.755367  | -3.769920 |
| 187 | 8 | 0 | -15.944519 | -2.218253 | -0.937995 |
| 188 | 7 | 0 | -13.842654 | -2.888623 | -1.565731 |
| 189 | 6 | 0 | -13.956065 | -3.363016 | 1.744354  |
| 190 | 6 | 0 | -13.886828 | -1.123832 | 2.811173  |
| 191 | 1 | 0 | -15.578454 | -1.936298 | 1.739343  |
| 192 | 1 | 0 | -12.838463 | -2.792131 | -1.394532 |
| 193 | 6 | 0 | -14.287685 | -3.843904 | -2.586009 |
| 194 | 1 | 0 | -14.149618 | -3.775241 | 2.764084  |
| 195 | 1 | 0 | -14.484479 | -4.007625 | 1.000793  |
| 196 | 1 | 0 | -12.857831 | -3.411947 | 1.542953  |
| 197 | 1 | 0 | -14.098205 | -1.639731 | 3.779276  |
| 198 | 1 | 0 | -12.780675 | -1.008581 | 2.704131  |
| 199 | 1 | 0 | -14.348695 | -0.107927 | 2.852382  |
| 200 | 6 | 0 | -13.798334 | -5.258217 | -2.182814 |
| 201 | 6 | 0 | -13.745330 | -3.575355 | -3.981205 |
| 202 | 1 | 0 | -15.382254 | -3.810306 | -2.605669 |
| 203 | 8 | 0 | -12.595828 | -5.472323 | -1.959336 |
| 204 | 7 | 0 | -14.761923 | -6.205025 | -2.123378 |
| 205 | 6 | 0 | -14.400513 | -2.418272 | -4.646266 |
| 206 | 1 | 0 | -12.631841 | -3.413108 | -3.937438 |
| 207 | 1 | 0 | -13.917846 | -4.501686 | -4.596636 |
| 208 | 1 | 0 | -15.740129 | -5.931436 | -2.242511 |
| 209 | 6 | 0 | -14.442691 | -7.597522 | -1.785586 |
| 210 | 6 | 0 | -13.877336 | -1.126217 | -4.503446 |
| 211 | 6 | 0 | -15.530698 | -2.615850 | -5.446913 |
| 212 | 6 | 0 | -14.692550 | -8.519615 | -3.005805 |
| 213 | 6 | 0 | -15.182622 | -8.130658 | -0.575942 |

|     |   |   |            |            |           |
|-----|---|---|------------|------------|-----------|
| 214 | 1 | 0 | -13.371654 | -7.614410  | -1.547883 |
| 215 | 6 | 0 | -14.458556 | -0.046676  | -5.158685 |
| 216 | 1 | 0 | -12.997202 | -0.962667  | -3.860781 |
| 217 | 6 | 0 | -16.129332 | -1.547594  | -6.109848 |
| 218 | 1 | 0 | -15.955126 | -3.625861  | -5.556632 |
| 219 | 8 | 0 | -15.723809 | -8.441386  | -3.692708 |
| 220 | 7 | 0 | -13.710423 | -9.415555  | -3.237006 |
| 221 | 6 | 0 | -16.690340 | -8.147795  | -0.703682 |
| 222 | 1 | 0 | -14.811713 | -9.174505  | -0.385338 |
| 223 | 1 | 0 | -14.898689 | -7.509426  | 0.317994  |
| 224 | 6 | 0 | -15.587211 | -0.263209  | -5.966422 |
| 225 | 1 | 0 | -14.055768 | 0.970415   | -5.047117 |
| 226 | 1 | 0 | -17.019405 | -1.709319  | -6.734054 |
| 227 | 1 | 0 | -12.836911 | -9.339515  | -2.712719 |
| 228 | 6 | 0 | -13.794102 | -10.380189 | -4.323565 |
| 229 | 6 | 0 | -17.312502 | -8.747556  | 0.540465  |
| 230 | 1 | 0 | -17.080231 | -7.105090  | -0.857758 |
| 231 | 1 | 0 | -16.986844 | -8.743480  | -1.608814 |
| 232 | 8 | 0 | -16.111913 | 0.840155   | -6.599987 |
| 233 | 1 | 0 | -13.101758 | -11.202961 | -4.122975 |
| 234 | 1 | 0 | -14.812112 | -10.773862 | -4.394622 |
| 235 | 1 | 0 | -13.534906 | -9.928289  | -5.290539 |
| 236 | 6 | 0 | -18.830449 | -8.828301  | 0.392878  |
| 237 | 1 | 0 | -16.896072 | -9.773651  | 0.718540  |
| 238 | 1 | 0 | -17.044476 | -8.119955  | 1.431003  |
| 239 | 1 | 0 | -16.916764 | 0.563709   | -7.062191 |
| 240 | 7 | 0 | -19.494515 | -9.360283  | 1.559790  |
| 241 | 1 | 0 | -19.209713 | -7.800429  | 0.110047  |
| 242 | 1 | 0 | -19.072712 | -9.517760  | -0.467106 |
| 243 | 1 | 0 | -19.171713 | -8.912838  | 2.394506  |
| 244 | 1 | 0 | -20.483904 | -9.234016  | 1.482467  |
| 245 | 1 | 0 | -7.024141  | 2.500284   | 6.168547  |
| 246 | 7 | 0 | -7.990321  | 2.326426   | 6.450761  |
| 247 | 6 | 0 | -9.033672  | 2.492739   | 5.604253  |
| 248 | 1 | 0 | -8.200580  | 2.083497   | 7.409724  |
| 249 | 6 | 0 | -8.680235  | 2.919901   | 4.183766  |
| 250 | 8 | 0 | -10.211182 | 2.317346   | 5.952124  |
| 251 | 6 | 0 | -9.206707  | 4.339117   | 3.894844  |
| 252 | 1 | 0 | -9.158751  | 2.199598   | 3.508502  |
| 253 | 1 | 0 | -7.597593  | 2.872020   | 4.025918  |
| 254 | 6 | 0 | -8.917851  | 4.810632   | 2.455854  |
| 255 | 1 | 0 | -8.735205  | 5.054441   | 4.579813  |
| 256 | 1 | 0 | -10.286103 | 4.372078   | 4.076114  |

|     |   |   |            |           |           |
|-----|---|---|------------|-----------|-----------|
| 257 | 7 | 0 | -9.368679  | 6.188803  | 2.275668  |
| 258 | 6 | 0 | -9.650204  | 3.920189  | 1.432363  |
| 259 | 1 | 0 | -7.844069  | 4.790751  | 2.259407  |
| 260 | 6 | 0 | -8.526412  | 7.198851  | 1.970692  |
| 261 | 1 | 0 | -10.364196 | 6.391419  | 2.417062  |
| 262 | 8 | 0 | -10.886812 | 3.832170  | 1.449905  |
| 263 | 7 | 0 | -8.853646  | 3.264285  | 0.557937  |
| 264 | 6 | 0 | -9.178863  | 8.598029  | 1.853675  |
| 265 | 8 | 0 | -7.302542  | 7.062774  | 1.807064  |
| 266 | 1 | 0 | -7.840943  | 3.403824  | 0.605666  |
| 267 | 6 | 0 | -9.392977  | 2.391764  | -0.499175 |
| 268 | 7 | 0 | -8.539356  | 9.471719  | 2.848186  |
| 269 | 6 | 0 | -9.031212  | 9.080548  | 0.412697  |
| 270 | 1 | 0 | -10.242907 | 8.545468  | 2.109666  |
| 271 | 6 | 0 | -8.799916  | 0.979590  | -0.263114 |
| 272 | 6 | 0 | -9.044267  | 2.839533  | -1.916652 |
| 273 | 1 | 0 | -10.481812 | 2.373508  | -0.383034 |
| 274 | 1 | 0 | -7.533069  | 9.637713  | 2.775843  |
| 275 | 6 | 0 | -9.245307  | 10.106223 | 3.818557  |
| 276 | 6 | 0 | -9.742807  | 8.122477  | -0.523267 |
| 277 | 6 | 0 | -9.592014  | 10.477191 | 0.240455  |
| 278 | 1 | 0 | -7.933303  | 9.093137  | 0.148479  |
| 279 | 8 | 0 | -7.568728  | 0.816024  | -0.248468 |
| 280 | 7 | 0 | -9.699431  | -0.007097 | -0.053516 |
| 281 | 6 | 0 | -9.628006  | 4.213267  | -2.220986 |
| 282 | 6 | 0 | -9.567428  | 1.813290  | -2.903846 |
| 283 | 1 | 0 | -7.920545  | 2.891738  | -2.011601 |
| 284 | 6 | 0 | -8.418221  | 10.958464 | 4.769790  |
| 285 | 8 | 0 | -10.475816 | 10.006922 | 3.955705  |
| 286 | 1 | 0 | -9.671283  | 8.492941  | -1.574225 |
| 287 | 1 | 0 | -9.279815  | 7.106691  | -0.476208 |
| 288 | 1 | 0 | -10.822817 | 8.035474  | -0.249662 |
| 289 | 1 | 0 | -9.574772  | 10.764391 | -0.838928 |
| 290 | 1 | 0 | -10.648176 | 10.521727 | 0.602672  |
| 291 | 1 | 0 | -8.988188  | 11.223383 | 0.809795  |
| 292 | 1 | 0 | -10.699537 | 0.219235  | -0.054283 |
| 293 | 6 | 0 | -9.282428  | -1.376633 | 0.283754  |
| 294 | 6 | 0 | -9.009059  | 4.835824  | -3.447061 |
| 295 | 1 | 0 | -10.738483 | 4.118849  | -2.361463 |
| 296 | 1 | 0 | -9.464290  | 4.903440  | -1.351030 |
| 297 | 1 | 0 | -9.415854  | 2.172400  | -3.950401 |
| 298 | 1 | 0 | -9.026800  | 0.841598  | -2.787178 |
| 299 | 1 | 0 | -10.659056 | 1.634790  | -2.744302 |

|     |   |   |            |           |           |
|-----|---|---|------------|-----------|-----------|
| 300 | 1 | 0 | -8.841768  | 11.967987 | 4.787080  |
| 301 | 1 | 0 | -8.516178  | 10.543206 | 5.778864  |
| 302 | 1 | 0 | -7.363015  | 11.000273 | 4.488528  |
| 303 | 6 | 0 | -9.899265  | -2.355960 | -0.746588 |
| 304 | 6 | 0 | -9.719110  | -1.828293 | 1.676872  |
| 305 | 1 | 0 | -8.189555  | -1.403450 | 0.226240  |
| 306 | 1 | 0 | -9.397706  | 5.874133  | -3.584887 |
| 307 | 1 | 0 | -7.897186  | 4.886051  | -3.346091 |
| 308 | 1 | 0 | -9.251115  | 4.248366  | -4.365290 |
| 309 | 8 | 0 | -11.126428 | -2.413648 | -0.905609 |
| 310 | 7 | 0 | -9.006571  | -3.121918 | -1.415137 |
| 311 | 6 | 0 | -9.191227  | -3.223366 | 1.952969  |
| 312 | 6 | 0 | -9.228767  | -0.873837 | 2.746078  |
| 313 | 1 | 0 | -10.847873 | -1.858079 | 1.706850  |
| 314 | 1 | 0 | -8.008914  | -3.009995 | -1.214981 |
| 315 | 6 | 0 | -9.411319  | -4.219130 | -2.306762 |
| 316 | 1 | 0 | -9.436552  | -3.521951 | 3.000976  |
| 317 | 1 | 0 | -9.654199  | -3.966793 | 1.259771  |
| 318 | 1 | 0 | -8.081586  | -3.258051 | 1.823326  |
| 319 | 1 | 0 | -9.450345  | -1.288884 | 3.759313  |
| 320 | 1 | 0 | -8.125638  | -0.719854 | 2.658263  |
| 321 | 1 | 0 | -9.735476  | 0.117577  | 2.660067  |
| 322 | 6 | 0 | -8.951136  | -5.539033 | -1.637120 |
| 323 | 6 | 0 | -8.775389  | -4.172925 | -3.685025 |
| 324 | 1 | 0 | -10.502816 | -4.188169 | -2.396581 |
| 325 | 8 | 0 | -7.749906  | -5.714948 | -1.373912 |
| 326 | 7 | 0 | -9.925095  | -6.437076 | -1.363275 |
| 327 | 6 | 0 | -9.296700  | -3.074108 | -4.539860 |
| 328 | 1 | 0 | -7.656951  | -4.077718 | -3.587004 |
| 329 | 1 | 0 | -8.978719  | -5.162349 | -4.180938 |
| 330 | 1 | 0 | -10.902950 | -6.192901 | -1.545038 |
| 331 | 6 | 0 | -9.612283  | -7.659039 | -0.610511 |
| 332 | 6 | 0 | -8.771715  | -1.779290 | -4.429236 |
| 333 | 6 | 0 | -10.289226 | -3.332713 | -5.491376 |
| 334 | 6 | 0 | -10.113713 | -8.914239 | -1.356576 |
| 335 | 6 | 0 | -10.120565 | -7.663295 | 0.817045  |
| 336 | 1 | 0 | -8.518393  | -7.704063 | -0.556316 |
| 337 | 6 | 0 | -9.216251  | -0.757436 | -5.260133 |
| 338 | 1 | 0 | -7.998679  | -1.567488 | -3.672798 |
| 339 | 6 | 0 | -10.743293 | -2.324608 | -6.338012 |
| 340 | 1 | 0 | -10.717272 | -4.343452 | -5.576110 |
| 341 | 8 | 0 | -11.265006 | -9.007424 | -1.810630 |
| 342 | 7 | 0 | -9.197076  | -9.901019 | -1.450102 |

|     |   |   |            |            |           |
|-----|---|---|------------|------------|-----------|
| 343 | 6 | 0 | -11.609224 | -7.449583  | 0.981633  |
| 344 | 1 | 0 | -9.831207  | -8.645462  | 1.280962  |
| 345 | 1 | 0 | -9.572377  | -6.856456  | 1.380301  |
| 346 | 6 | 0 | -10.202282 | -1.037094  | -6.220739 |
| 347 | 1 | 0 | -8.815095  | 0.262750   | -5.172177 |
| 348 | 1 | 0 | -11.523439 | -2.533055  | -7.083296 |
| 349 | 1 | 0 | -8.246865  | -9.726879  | -1.119082 |
| 350 | 6 | 0 | -9.504766  | -11.173796 | -2.085354 |
| 351 | 6 | 0 | -11.968481 | -7.461208  | 2.453919  |
| 352 | 1 | 0 | -11.917018 | -6.471531  | 0.523524  |
| 353 | 1 | 0 | -12.171433 | -8.254770  | 0.436571  |
| 354 | 8 | 0 | -10.585461 | 0.007024   | -7.031470 |
| 355 | 1 | 0 | -8.703770  | -11.882889 | -1.859620 |
| 356 | 1 | 0 | -10.452535 | -11.570666 | -1.706826 |
| 357 | 1 | 0 | -9.589624  | -11.070757 | -3.175005 |
| 358 | 6 | 0 | -13.454110 | -7.168166  | 2.650201  |
| 359 | 1 | 0 | -11.716509 | -8.460063  | 2.897786  |
| 360 | 1 | 0 | -11.351116 | -6.694423  | 2.994685  |
| 361 | 1 | 0 | -11.342513 | -0.287495  | -7.558610 |
| 362 | 7 | 0 | -13.855756 | -7.155203  | 4.037036  |
| 363 | 1 | 0 | -13.693613 | -6.194667  | 2.121401  |
| 364 | 1 | 0 | -14.050560 | -7.979683  | 2.141051  |
| 365 | 1 | 0 | -13.273014 | -6.547016  | 4.576574  |
| 366 | 1 | 0 | -14.807209 | -6.857807  | 4.120163  |
| 367 | 1 | 0 | -2.162840  | 3.093245   | 5.797653  |
| 368 | 7 | 0 | -3.127610  | 2.928984   | 6.091043  |
| 369 | 6 | 0 | -4.167305  | 2.975567   | 5.226221  |
| 370 | 1 | 0 | -3.338717  | 2.778156   | 7.068579  |
| 371 | 6 | 0 | -3.816210  | 3.264615   | 3.771255  |
| 372 | 8 | 0 | -5.342497  | 2.801701   | 5.584105  |
| 373 | 6 | 0 | -4.386587  | 4.627784   | 3.333224  |
| 374 | 1 | 0 | -4.264448  | 2.462181   | 3.172144  |
| 375 | 1 | 0 | -2.731426  | 3.236414   | 3.624729  |
| 376 | 6 | 0 | -4.115347  | 4.945383   | 1.849208  |
| 377 | 1 | 0 | -3.934632  | 5.426784   | 3.933472  |
| 378 | 1 | 0 | -5.466077  | 4.648646   | 3.515797  |
| 379 | 7 | 0 | -4.586561  | 6.289405   | 1.522133  |
| 380 | 6 | 0 | -4.842307  | 3.940016   | 0.935002  |
| 381 | 1 | 0 | -3.042752  | 4.919440   | 1.647563  |
| 382 | 1 | 0 | -5.586817  | 6.490202   | 1.628426  |
| 383 | 6 | 0 | -3.754894  | 7.271020   | 1.112058  |
| 384 | 8 | 0 | -6.078085  | 3.843351   | 0.970546  |
| 385 | 7 | 0 | -4.044784  | 3.201014   | 0.131282  |



|     |   |   |           |           |           |
|-----|---|---|-----------|-----------|-----------|
| 386 | 6 | 0 | -4.421643 | 8.643591  | 0.850514  |
| 387 | 8 | 0 | -2.529390 | 7.130852  | 0.964968  |
| 388 | 1 | 0 | -3.032198 | 3.345731  | 0.166790  |
| 389 | 6 | 0 | -4.580968 | 2.209479  | -0.816256 |
| 390 | 7 | 0 | -3.779254 | 9.624885  | 1.736868  |
| 391 | 6 | 0 | -4.295026 | 8.968317  | -0.635662 |
| 392 | 1 | 0 | -5.482445 | 8.610231  | 1.122924  |
| 393 | 6 | 0 | -3.996863 | 0.834082  | -0.405311 |
| 394 | 6 | 0 | -4.220374 | 2.480750  | -2.274812 |
| 395 | 1 | 0 | -5.670535 | 2.210150  | -0.706441 |
| 396 | 6 | 0 | -4.475363 | 10.331374 | 2.663261  |
| 397 | 1 | 0 | -2.776240 | 9.793251  | 1.631484  |
| 398 | 6 | 0 | -5.008435 | 7.907760  | -1.452290 |
| 399 | 6 | 0 | -4.872206 | 10.332967 | -0.950973 |
| 400 | 1 | 0 | -3.200585 | 8.961997  | -0.913752 |
| 401 | 8 | 0 | -2.766735 | 0.665149  | -0.370403 |
| 402 | 7 | 0 | -4.903046 | -0.111240 | -0.072472 |
| 403 | 6 | 0 | -4.783289 | 3.816186  | -2.744027 |
| 404 | 6 | 0 | -4.753474 | 1.350506  | -3.134931 |
| 405 | 1 | 0 | -3.095641 | 2.506329  | -2.368811 |
| 406 | 6 | 0 | -3.644835 | 11.286024 | 3.508042  |
| 407 | 8 | 0 | -5.699765 | 10.220022 | 2.841321  |
| 408 | 1 | 0 | -4.963466 | 8.167879  | -2.537234 |
| 409 | 1 | 0 | -4.527599 | 6.909334  | -1.309739 |
| 410 | 1 | 0 | -6.081222 | 7.833823  | -1.148020 |
| 411 | 1 | 0 | -4.867419 | 10.502897 | -2.055044 |
| 412 | 1 | 0 | -5.925598 | 10.405589 | -0.585454 |
| 413 | 1 | 0 | -4.271563 | 11.141793 | -0.470813 |
| 414 | 1 | 0 | -5.901333 | 0.120394  | -0.104406 |
| 415 | 6 | 0 | -4.497711 | -1.433774 | 0.426926  |
| 416 | 6 | 0 | -4.167980 | 4.269019  | -4.044139 |
| 417 | 1 | 0 | -5.896775 | 3.726249  | -2.861542 |
| 418 | 1 | 0 | -4.597008 | 4.606636  | -1.969144 |
| 419 | 1 | 0 | -4.577809 | 1.571318  | -4.215468 |
| 420 | 1 | 0 | -4.237743 | 0.389550  | -2.888391 |
| 421 | 1 | 0 | -5.851246 | 1.217302  | -2.973569 |
| 422 | 1 | 0 | -4.085681 | 12.285649 | 3.435245  |
| 423 | 1 | 0 | -3.714721 | 10.971016 | 4.554968  |
| 424 | 1 | 0 | -2.596427 | 11.316557 | 3.200948  |
| 425 | 6 | 0 | -5.096856 | -2.525102 | -0.496330 |
| 426 | 6 | 0 | -4.964130 | -1.720743 | 1.853610  |
| 427 | 1 | 0 | -3.403879 | -1.468777 | 0.395037  |
| 428 | 1 | 0 | -4.538022 | 5.290228  | -4.305548 |

|     |   |   |           |            |           |
|-----|---|---|-----------|------------|-----------|
| 429 | 1 | 0 | -3.054163 | 4.308050   | -3.961705 |
| 430 | 1 | 0 | -4.433479 | 3.578009   | -4.880116 |
| 431 | 8 | 0 | -6.319494 | -2.589189  | -0.686260 |
| 432 | 7 | 0 | -4.193994 | -3.375452  | -1.035586 |
| 433 | 6 | 0 | -4.471799 | -3.087034  | 2.291552  |
| 434 | 6 | 0 | -4.467604 | -0.663439  | 2.818179  |
| 435 | 1 | 0 | -6.093593 | -1.723708  | 1.868209  |
| 436 | 1 | 0 | -3.200281 | -3.240744  | -0.829330 |
| 437 | 6 | 0 | -4.579045 | -4.575181  | -1.795582 |
| 438 | 1 | 0 | -4.726814 | -3.256641  | 3.365794  |
| 439 | 1 | 0 | -4.952311 | -3.894207  | 1.686973  |
| 440 | 1 | 0 | -3.363142 | -3.164045  | 2.172553  |
| 441 | 1 | 0 | -4.722553 | -0.952905  | 3.866604  |
| 442 | 1 | 0 | -3.358716 | -0.551279  | 2.740114  |
| 443 | 1 | 0 | -4.941980 | 0.325171   | 2.607058  |
| 444 | 6 | 0 | -4.140988 | -5.793773  | -0.943951 |
| 445 | 6 | 0 | -3.894796 | -4.706593  | -3.144518 |
| 446 | 1 | 0 | -5.666883 | -4.555031  | -1.923081 |
| 447 | 8 | 0 | -2.939788 | -5.953893  | -0.670259 |
| 448 | 7 | 0 | -5.128531 | -6.616140  | -0.519498 |
| 449 | 6 | 0 | -4.341975 | -3.699606  | -4.142121 |
| 450 | 1 | 0 | -2.778008 | -4.634343  | -3.012102 |
| 451 | 1 | 0 | -4.113839 | -5.740786  | -3.530025 |
| 452 | 1 | 0 | -6.102445 | -6.394290  | -0.745189 |
| 453 | 6 | 0 | -4.818751 | -7.715553  | 0.403544  |
| 454 | 6 | 0 | -3.789278 | -2.411527  | -4.146273 |
| 455 | 6 | 0 | -5.285759 | -4.043933  | -5.115793 |
| 456 | 6 | 0 | -5.383479 | -9.058974  | -0.107204 |
| 457 | 6 | 0 | -5.249920 | -7.482481  | 1.837502  |
| 458 | 1 | 0 | -3.725015 | -7.787977  | 0.417135  |
| 459 | 6 | 0 | -4.159536 | -1.481033  | -5.110248 |
| 460 | 1 | 0 | -3.052470 | -2.131946  | -3.375804 |
| 461 | 6 | 0 | -5.664066 | -3.129036  | -6.095127 |
| 462 | 1 | 0 | -5.735114 | -5.048949  | -5.112521 |
| 463 | 8 | 0 | -6.556410 | -9.195606  | -0.490307 |
| 464 | 7 | 0 | -4.489601 | -10.071164 | -0.070725 |
| 465 | 6 | 0 | -6.716544 | -7.176941  | 2.047853  |
| 466 | 1 | 0 | -4.972341 | -8.397808  | 2.428721  |
| 467 | 1 | 0 | -4.640220 | -6.627472  | 2.245621  |
| 468 | 6 | 0 | -5.096871 | -1.847505  | -6.090189 |
| 469 | 1 | 0 | -3.736563 | -0.465946  | -5.114034 |
| 470 | 1 | 0 | -6.406687 | -3.404277  | -6.856860 |
| 471 | 1 | 0 | -3.524180 | -9.867005  | 0.191506  |

|     |   |   |           |            |           |
|-----|---|---|-----------|------------|-----------|
| 472 | 6 | 0 | -4.846594 | -11.427605 | -0.459003 |
| 473 | 6 | 0 | -6.992577 | -7.008722  | 3.529045  |
| 474 | 1 | 0 | -7.001202 | -6.239783  | 1.499287  |
| 475 | 1 | 0 | -7.344678 | -8.006407  | 1.624359  |
| 476 | 8 | 0 | -5.403719 | -0.895084  | -7.035253 |
| 477 | 1 | 0 | -4.077203 | -12.113610 | -0.094227 |
| 478 | 1 | 0 | -5.810843 | -11.704904 | -0.021148 |
| 479 | 1 | 0 | -4.923934 | -11.530294 | -1.549338 |
| 480 | 6 | 0 | -8.454495 | -6.644712  | 3.775790  |
| 481 | 1 | 0 | -6.742429 | -7.958854  | 4.070633  |
| 482 | 1 | 0 | -6.323838 | -6.206519  | 3.943231  |
| 483 | 1 | 0 | -6.152137 | -1.222158  | -7.555506 |
| 484 | 7 | 0 | -8.769064 | -6.470808  | 5.173665  |
| 485 | 1 | 0 | -8.696314 | -5.723829  | 3.159708  |
| 486 | 1 | 0 | -9.107054 | -7.481797  | 3.389443  |
| 487 | 1 | 0 | -8.174561 | -5.787056  | 5.596857  |
| 488 | 1 | 0 | -9.723699 | -6.193042  | 5.283064  |
| 489 | 1 | 0 | 7.586126  | 4.214261   | 4.818760  |
| 490 | 7 | 0 | 6.633008  | 4.109342   | 5.170625  |
| 491 | 6 | 0 | 5.568382  | 3.941756   | 4.352206  |
| 492 | 1 | 0 | 6.452751  | 4.186127   | 6.162921  |
| 493 | 6 | 0 | 5.872082  | 3.887807   | 2.859426  |
| 494 | 8 | 0 | 4.407301  | 3.842767   | 4.778138  |
| 495 | 6 | 0 | 5.246984  | 5.094086   | 2.131823  |
| 496 | 1 | 0 | 5.435540  | 2.954978   | 2.480947  |
| 497 | 1 | 0 | 6.952848  | 3.852088   | 2.685945  |
| 498 | 6 | 0 | 5.469973  | 5.056494   | 0.606764  |
| 499 | 1 | 0 | 5.690162  | 6.023061   | 2.510770  |
| 500 | 1 | 0 | 4.173026  | 5.132177   | 2.342371  |
| 501 | 7 | 0 | 4.966768  | 6.277746   | -0.016313 |
| 502 | 6 | 0 | 4.742164  | 3.853811   | -0.022541 |
| 503 | 1 | 0 | 6.537469  | 4.997477   | 0.386765  |
| 504 | 6 | 0 | 5.773053  | 7.138608   | -0.674381 |
| 505 | 1 | 0 | 3.964608  | 6.484020   | 0.053068  |
| 506 | 8 | 0 | 3.506366  | 3.768159   | 0.042848  |
| 507 | 7 | 0 | 5.537788  | 2.938721   | -0.617837 |
| 508 | 6 | 0 | 5.074984  | 8.393816   | -1.251803 |
| 509 | 8 | 0 | 6.997966  | 6.979377   | -0.809447 |
| 510 | 1 | 0 | 6.550104  | 3.089944   | -0.626543 |
| 511 | 6 | 0 | 5.002495  | 1.738413   | -1.280989 |
| 512 | 7 | 0 | 5.716392  | 9.573835   | -0.655372 |
| 513 | 6 | 0 | 5.162969  | 8.337605   | -2.774955 |
| 514 | 1 | 0 | 4.021150  | 8.414754   | -0.952688 |

|     |   |   |          |           |           |
|-----|---|---|----------|-----------|-----------|
| 515 | 6 | 0 | 5.593862 | 0.513224  | -0.538601 |
| 516 | 6 | 0 | 5.354661 | 1.633577  | -2.762943 |
| 517 | 1 | 0 | 3.913363 | 1.761345  | -1.170123 |
| 518 | 6 | 0 | 5.023902 | 10.490399 | 0.067574  |
| 519 | 1 | 0 | 6.713919 | 9.721232  | -0.824620 |
| 520 | 6 | 0 | 4.449648 | 7.098543  | -3.281477 |
| 521 | 6 | 0 | 4.555749 | 9.573484  | -3.406361 |
| 522 | 1 | 0 | 6.250859 | 8.274008  | -3.070883 |
| 523 | 8 | 0 | 6.824470 | 0.370150  | -0.451089 |
| 524 | 7 | 0 | 4.690627 | -0.329494 | 0.008123  |
| 525 | 6 | 0 | 4.782854 | 2.804973  | -3.551187 |
| 526 | 6 | 0 | 4.821224 | 0.320762  | -3.304561 |
| 527 | 1 | 0 | 6.478695 | 1.637694  | -2.867774 |
| 528 | 6 | 0 | 5.853397 | 11.641239 | 0.617861  |
| 529 | 8 | 0 | 3.804223 | 10.417896 | 0.291584  |
| 530 | 1 | 0 | 4.459021 | 7.082775  | -4.397917 |
| 531 | 1 | 0 | 4.955155 | 6.172988  | -2.912485 |
| 532 | 1 | 0 | 3.387510 | 7.087663  | -2.933949 |
| 533 | 1 | 0 | 4.531552 | 9.461100  | -4.517514 |
| 534 | 1 | 0 | 3.510262 | 9.724852  | -3.042236 |
| 535 | 1 | 0 | 5.154062 | 10.482990 | -3.160661 |
| 536 | 1 | 0 | 3.691439 | -0.123365 | -0.092419 |
| 537 | 6 | 0 | 5.096892 | -1.492452 | 0.810996  |
| 538 | 6 | 0 | 5.395591 | 2.923126  | -4.923900 |
| 539 | 1 | 0 | 3.670359 | 2.679368  | -3.642227 |
| 540 | 1 | 0 | 4.961321 | 3.765858  | -2.999176 |
| 541 | 1 | 0 | 4.976770 | 0.265405  | -4.409063 |
| 542 | 1 | 0 | 5.352933 | -0.544334 | -2.836159 |
| 543 | 1 | 0 | 3.727808 | 0.223592  | -3.094252 |
| 544 | 1 | 0 | 5.407786 | 12.582223 | 0.278788  |
| 545 | 1 | 0 | 5.789100 | 11.622280 | 1.711225  |
| 546 | 1 | 0 | 6.900254 | 11.592209 | 0.307714  |
| 547 | 6 | 0 | 4.518119 | -2.773867 | 0.159489  |
| 548 | 6 | 0 | 4.608847 | -1.438573 | 2.257888  |
| 549 | 1 | 0 | 6.191388 | -1.523063 | 0.803750  |
| 550 | 1 | 0 | 5.003777 | 3.834037  | -5.438598 |
| 551 | 1 | 0 | 6.507639 | 3.008515  | -4.854500 |
| 552 | 1 | 0 | 5.151026 | 2.034666  | -5.554515 |
| 553 | 8 | 0 | 3.298494 | -2.893118 | -0.023469 |
| 554 | 7 | 0 | 5.434637 | -3.714755 | -0.161382 |
| 555 | 6 | 0 | 5.058523 | -2.681297 | 3.002332  |
| 556 | 6 | 0 | 5.125332 | -0.202027 | 2.964310  |
| 557 | 1 | 0 | 3.479629 | -1.411345 | 2.255611  |

|     |   |   |          |            |           |
|-----|---|---|----------|------------|-----------|
| 558 | 1 | 0 | 6.424284 | -3.525781  | 0.019852  |
| 559 | 6 | 0 | 5.069965 | -5.061400  | -0.630953 |
| 560 | 1 | 0 | 4.790875 | -2.594561  | 4.083441  |
| 561 | 1 | 0 | 4.558356 | -3.592095  | 2.591495  |
| 562 | 1 | 0 | 6.165083 | -2.813483  | 2.919480  |
| 563 | 1 | 0 | 4.834277 | -0.228703  | 4.042503  |
| 564 | 1 | 0 | 6.239457 | -0.149792  | 2.898267  |
| 565 | 1 | 0 | 4.698016 | 0.725481   | 2.512698  |
| 566 | 6 | 0 | 5.490986 | -6.042590  | 0.492569  |
| 567 | 1 | 0 | 3.985887 | -5.079144  | -0.787536 |
| 568 | 8 | 0 | 6.690433 | -6.134414  | 0.803532  |
| 569 | 7 | 0 | 4.498401 | -6.734244  | 1.097852  |
| 570 | 6 | 0 | 5.432019 | -4.721660  | -3.102883 |
| 571 | 1 | 0 | 3.525057 | -6.572523  | 0.822725  |
| 572 | 6 | 0 | 4.804959 | -7.580803  | 2.258720  |
| 573 | 6 | 0 | 6.032377 | -3.480117  | -3.353229 |
| 574 | 6 | 0 | 4.197024 | -8.992721  | 2.106178  |
| 575 | 6 | 0 | 4.421099 | -6.988363  | 3.599561  |
| 576 | 1 | 0 | 5.896470 | -7.679943  | 2.269023  |
| 577 | 6 | 0 | 5.747143 | -2.772830  | -4.515408 |
| 578 | 1 | 0 | 6.740094 | -3.058601  | -2.620870 |
| 579 | 8 | 0 | 3.011478 | -9.193312  | 1.796829  |
| 580 | 7 | 0 | 5.075378 | -9.986565  | 2.365696  |
| 581 | 6 | 0 | 2.970371 | -6.591482  | 3.758649  |
| 582 | 1 | 0 | 4.690163 | -7.739383  | 4.392057  |
| 583 | 1 | 0 | 5.065173 | -6.080123  | 3.772708  |
| 584 | 6 | 0 | 4.847464 | -3.319520  | -5.445336 |
| 585 | 1 | 0 | 6.207970 | -1.794380  | -4.713792 |
| 586 | 1 | 0 | 6.047993 | -9.744732  | 2.557609  |
| 587 | 6 | 0 | 4.683784 | -11.387824 | 2.322468  |
| 588 | 6 | 0 | 2.746351 | -6.034262  | 5.150606  |
| 589 | 1 | 0 | 2.691471 | -5.820056  | 2.992252  |
| 590 | 1 | 0 | 2.310023 | -7.482787  | 3.581362  |
| 591 | 8 | 0 | 4.626021 | -2.588310  | -6.590199 |
| 592 | 1 | 0 | 5.499239 | -11.993732 | 2.726218  |
| 593 | 1 | 0 | 3.783422 | -11.554368 | 2.923752  |
| 594 | 1 | 0 | 4.473810 | -11.714716 | 1.296170  |
| 595 | 6 | 0 | 1.290730 | -5.618864  | 5.345973  |
| 596 | 1 | 0 | 3.025735 | -6.805180  | 5.916478  |
| 597 | 1 | 0 | 3.420493 | -5.149667  | 5.309845  |
| 598 | 1 | 0 | 3.891367 | -2.999489  | -7.068847 |
| 599 | 7 | 0 | 1.023122 | -5.089282  | 6.661485  |
| 600 | 1 | 0 | 1.019694 | -4.888195  | 4.521925  |

|     |   |   |           |           |           |
|-----|---|---|-----------|-----------|-----------|
| 601 | 1 | 0 | 0.634363  | -6.528243 | 5.210329  |
| 602 | 1 | 0 | 1.599939  | -4.296373 | 6.857420  |
| 603 | 1 | 0 | 0.060914  | -4.828324 | 6.742180  |
| 604 | 6 | 0 | 4.232957  | -4.556151 | -5.205831 |
| 605 | 1 | 0 | 3.519736  | -4.971294 | -5.931459 |
| 606 | 6 | 0 | 4.526812  | -5.245518 | -4.032210 |
| 607 | 1 | 0 | 4.040543  | -6.213962 | -3.838098 |
| 608 | 6 | 0 | 5.795139  | -5.500415 | -1.890520 |
| 609 | 1 | 0 | 5.550421  | -6.586634 | -2.052800 |
| 610 | 1 | 0 | 6.907870  | -5.433971 | -1.724486 |
| 611 | 1 | 0 | 2.708236  | 3.649161  | 5.361575  |
| 612 | 7 | 0 | 1.746027  | 3.520937  | 5.680346  |
| 613 | 6 | 0 | 0.696190  | 3.478121  | 4.827876  |
| 614 | 1 | 0 | 1.546003  | 3.478258  | 6.670896  |
| 615 | 6 | 0 | 1.030060  | 3.601690  | 3.345601  |
| 616 | 8 | 0 | -0.475185 | 3.349945  | 5.216500  |
| 617 | 6 | 0 | 0.424816  | 4.889712  | 2.754062  |
| 618 | 1 | 0 | 0.597855  | 2.722772  | 2.850552  |
| 619 | 1 | 0 | 2.114020  | 3.579841  | 3.191881  |
| 620 | 6 | 0 | 0.677281  | 5.031993  | 1.239953  |
| 621 | 1 | 0 | 0.864470  | 5.764346  | 3.248835  |
| 622 | 1 | 0 | -0.652985 | 4.910032  | 2.946286  |
| 623 | 7 | 0 | 0.190940  | 6.323531  | 0.760268  |
| 624 | 6 | 0 | -0.046811 | 3.918443  | 0.458783  |
| 625 | 1 | 0 | 1.748281  | 4.992687  | 1.032610  |
| 626 | 6 | 0 | 1.012126  | 7.253908  | 0.227014  |
| 627 | 1 | 0 | -0.809752 | 6.529657  | 0.849901  |
| 628 | 8 | 0 | -1.282294 | 3.821694  | 0.510228  |
| 629 | 7 | 0 | 0.751800  | 3.090145  | -0.250133 |
| 630 | 6 | 0 | 0.332896  | 8.581302  | -0.190626 |
| 631 | 8 | 0 | 2.237089  | 7.102831  | 0.085780  |
| 632 | 1 | 0 | 1.763793  | 3.243338  | -0.235373 |
| 633 | 6 | 0 | 0.218656  | 1.988323  | -1.069617 |
| 634 | 7 | 0 | 0.974947  | 9.666894  | 0.564545  |
| 635 | 6 | 0 | 0.443830  | 8.725283  | -1.706270 |
| 636 | 1 | 0 | -0.725032 | 8.573817  | 0.094498  |
| 637 | 6 | 0 | 0.801305  | 0.673925  | -0.490618 |
| 638 | 6 | 0 | 0.583975  | 2.077148  | -2.549347 |
| 639 | 1 | 0 | -0.871416 | 2.001385  | -0.965726 |
| 640 | 6 | 0 | 0.281772  | 10.476151 | 1.405466  |
| 641 | 1 | 0 | 1.974165  | 9.832456  | 0.424504  |
| 642 | 6 | 0 | -0.267767 | 7.568803  | -2.382162 |
| 643 | 6 | 0 | -0.147377 | 10.037752 | -2.178190 |

|     |   |   |           |           |           |
|-----|---|---|-----------|-----------|-----------|
| 644 | 1 | 0 | 1.535836  | 8.693300  | -1.992080 |
| 645 | 8 | 0 | 2.031414  | 0.513638  | -0.426320 |
| 646 | 7 | 0 | -0.105195 | -0.226915 | -0.051977 |
| 647 | 6 | 0 | 0.022564  | 3.343946  | -3.182120 |
| 648 | 6 | 0 | 0.053224  | 0.848688  | -3.263997 |
| 649 | 1 | 0 | 1.708945  | 2.091082  | -2.642223 |
| 650 | 6 | 0 | 1.113809  | 11.529908 | 2.121267  |
| 651 | 8 | 0 | -0.939919 | 10.379580 | 1.608769  |
| 652 | 1 | 0 | -0.236833 | 7.697859  | -3.490844 |
| 653 | 1 | 0 | 0.224403  | 6.598681  | -2.127148 |
| 654 | 1 | 0 | -1.336488 | 7.522653  | -2.058734 |
| 655 | 1 | 0 | -0.153486 | 10.073370 | -3.294689 |
| 656 | 1 | 0 | -1.198162 | 10.146343 | -1.814079 |
| 657 | 1 | 0 | 0.450641  | 10.902893 | -1.804771 |
| 658 | 1 | 0 | -1.103739 | -0.004255 | -0.119879 |
| 659 | 6 | 0 | 0.299812  | -1.476296 | 0.609634  |
| 660 | 6 | 0 | 0.641303  | 3.632652  | -4.526631 |
| 661 | 1 | 0 | -1.090513 | 3.239352  | -3.291037 |
| 662 | 1 | 0 | 0.206327  | 4.224474  | -2.510693 |
| 663 | 1 | 0 | 0.229095  | 0.934542  | -4.363478 |
| 664 | 1 | 0 | 0.570711  | -0.073684 | -2.901032 |
| 665 | 1 | 0 | -1.044407 | 0.734416  | -3.087558 |
| 666 | 1 | 0 | 0.653932  | 12.508851 | 1.951640  |
| 667 | 1 | 0 | 1.073226  | 11.329187 | 3.197585  |
| 668 | 1 | 0 | 2.154808  | 11.542232 | 1.788543  |
| 669 | 6 | 0 | -0.292336 | -2.674552 | -0.175311 |
| 670 | 6 | 0 | -0.173821 | -1.584896 | 2.058451  |
| 671 | 1 | 0 | 1.393937  | -1.511501 | 0.587736  |
| 672 | 1 | 0 | 0.268331  | 4.611413  | -4.915306 |
| 673 | 1 | 0 | 1.754613  | 3.686558  | -4.446013 |
| 674 | 1 | 0 | 0.381711  | 2.841151  | -5.270265 |
| 675 | 8 | 0 | -1.515111 | -2.770543 | -0.351448 |
| 676 | 7 | 0 | 0.616507  | -3.574151 | -0.614311 |
| 677 | 6 | 0 | 0.322053  | -2.882733 | 2.667218  |
| 678 | 6 | 0 | 0.311536  | -0.412519 | 2.886019  |
| 679 | 1 | 0 | -1.303312 | -1.592514 | 2.066726  |
| 680 | 1 | 0 | 1.609379  | -3.407786 | -0.428423 |
| 681 | 6 | 0 | 0.242626  | -4.858819 | -1.227672 |
| 682 | 1 | 0 | 0.046881  | -2.924240 | 3.749085  |
| 683 | 1 | 0 | -0.138625 | -3.762682 | 2.155858  |
| 684 | 1 | 0 | 1.433538  | -2.960769 | 2.579756  |
| 685 | 1 | 0 | 0.053740  | -0.571403 | 3.961323  |
| 686 | 1 | 0 | 1.420035  | -0.303294 | 2.798760  |

|     |   |   |           |            |           |
|-----|---|---|-----------|------------|-----------|
| 687 | 1 | 0 | -0.167897 | 0.539087   | 2.552076  |
| 688 | 6 | 0 | 0.672882  | -5.963144  | -0.228309 |
| 689 | 1 | 0 | -0.843325 | -4.858130  | -1.372110 |
| 690 | 8 | 0 | 1.873391  | -6.090543  | 0.065260  |
| 691 | 7 | 0 | -0.317178 | -6.722776  | 0.295233  |
| 692 | 6 | 0 | 0.547505  | -4.256368  | -3.654205 |
| 693 | 1 | 0 | -1.290870 | -6.531431  | 0.041996  |
| 694 | 6 | 0 | -0.007568 | -7.698463  | 1.348437  |
| 695 | 6 | 0 | 1.125325  | -2.986191  | -3.786348 |
| 696 | 6 | 0 | -0.601849 | -9.086776  | 1.025303  |
| 697 | 6 | 0 | -0.404578 | -7.273245  | 2.747638  |
| 698 | 1 | 0 | 1.084906  | -7.788031  | 1.352450  |
| 699 | 6 | 0 | 0.800187  | -2.164369  | -4.859236 |
| 700 | 1 | 0 | 1.846514  | -2.633858  | -3.030989 |
| 701 | 8 | 0 | -1.784285 | -9.256430  | 0.686823  |
| 702 | 7 | 0 | 0.282119  | -10.098483 | 1.169660  |
| 703 | 6 | 0 | -1.861640 | -6.918468  | 2.945008  |
| 704 | 1 | 0 | -0.127314 | -8.108541  | 3.447580  |
| 705 | 1 | 0 | 0.225664  | -6.382720  | 3.029147  |
| 706 | 6 | 0 | -0.116253 | -2.623810  | -5.819556 |
| 707 | 1 | 0 | 1.242934  | -1.163339  | -4.964586 |
| 708 | 1 | 0 | 1.253016  | -9.876046  | 1.392566  |
| 709 | 6 | 0 | -0.098956 | -11.486873 | 0.955724  |
| 710 | 6 | 0 | -2.101596 | -6.547143  | 4.395145  |
| 711 | 1 | 0 | -2.146266 | -6.059239  | 2.281047  |
| 712 | 1 | 0 | -2.509352 | -7.787741  | 2.650419  |
| 713 | 8 | 0 | -0.377302 | -1.779482  | -6.874749 |
| 714 | 1 | 0 | 0.716963  | -12.131554 | 1.292985  |
| 715 | 1 | 0 | -1.003918 | -11.729125 | 1.523438  |
| 716 | 1 | 0 | -0.296961 | -11.690398 | -0.104326 |
| 717 | 6 | 0 | -3.560369 | -6.162505  | 4.627392  |
| 718 | 1 | 0 | -1.827986 | -7.410794  | 5.057042  |
| 719 | 1 | 0 | -1.431396 | -5.690127  | 4.675489  |
| 720 | 1 | 0 | -1.122104 | -2.146891  | -7.372843 |
| 721 | 7 | 0 | -3.843999 | -5.810282  | 5.997889  |
| 722 | 1 | 0 | -3.824397 | -5.330655  | 3.903160  |
| 723 | 1 | 0 | -4.213391 | -7.046816  | 4.367285  |
| 724 | 1 | 0 | -3.259746 | -5.060412  | 6.308090  |
| 725 | 1 | 0 | -4.803682 | -5.546581  | 6.097526  |
| 726 | 6 | 0 | -0.707734 | -3.888498  | -5.697859 |
| 727 | 1 | 0 | -1.434133 | -4.235717  | -6.445707 |
| 728 | 6 | 0 | -0.374808 | -4.693167  | -4.611216 |
| 729 | 1 | 0 | -0.843482 | -5.684041  | -4.508771 |



|     |   |   |           |           |           |
|-----|---|---|-----------|-----------|-----------|
| 730 | 6 | 0 | 0.949471  | -5.152484 | -2.538876 |
| 731 | 1 | 0 | 0.716623  | -6.219352 | -2.810342 |
| 732 | 1 | 0 | 2.064491  | -5.086317 | -2.388917 |
| 733 | 1 | 0 | 12.465963 | 4.715124  | 4.097376  |
| 734 | 7 | 0 | 11.524120 | 4.671696  | 4.487770  |
| 735 | 6 | 0 | 10.435581 | 4.398038  | 3.730264  |
| 736 | 1 | 0 | 11.373440 | 4.886759  | 5.464504  |
| 737 | 6 | 0 | 10.698010 | 4.136572  | 2.251667  |
| 738 | 8 | 0 | 9.287578  | 4.365339  | 4.198358  |
| 739 | 6 | 0 | 10.062484 | 5.238363  | 1.381744  |
| 740 | 1 | 0 | 10.243417 | 3.166208  | 2.016911  |
| 741 | 1 | 0 | 11.773613 | 4.065430  | 2.057582  |
| 742 | 6 | 0 | 10.252995 | 4.997257  | -0.128992 |
| 743 | 1 | 0 | 10.514783 | 6.207574  | 1.624602  |
| 744 | 1 | 0 | 8.992767  | 5.309064  | 1.604719  |
| 745 | 7 | 0 | 9.723753  | 6.123616  | -0.894329 |
| 746 | 6 | 0 | 9.522078  | 3.715743  | -0.572860 |
| 747 | 1 | 0 | 11.315631 | 4.917565  | -0.366211 |
| 748 | 6 | 0 | 10.503589 | 6.888992  | -1.687880 |
| 749 | 1 | 0 | 8.725744  | 6.344865  | -0.811197 |
| 750 | 8 | 0 | 8.291658  | 3.626794  | -0.444404 |
| 751 | 7 | 0 | 10.307793 | 2.741363  | -1.080684 |
| 752 | 6 | 0 | 9.786270  | 8.071219  | -2.384289 |
| 753 | 8 | 0 | 11.722052 | 6.704604  | -1.851156 |
| 754 | 1 | 0 | 11.314651 | 2.904545  | -1.160589 |
| 755 | 6 | 0 | 9.768889  | 1.458450  | -1.563079 |
| 756 | 7 | 0 | 10.431771 | 9.309994  | -1.926065 |
| 757 | 6 | 0 | 9.849931  | 7.853912  | -3.893812 |
| 758 | 1 | 0 | 8.737469  | 8.119571  | -2.070694 |
| 759 | 6 | 0 | 10.388989 | 0.347780  | -0.674857 |
| 760 | 6 | 0 | 10.087204 | 1.155733  | -3.025562 |
| 761 | 1 | 0 | 8.682499  | 1.489648  | -1.429097 |
| 762 | 6 | 0 | 9.748322  | 10.301543 | -1.299432 |
| 763 | 1 | 0 | 11.425538 | 9.440156  | -2.126396 |
| 764 | 6 | 0 | 9.219144  | 9.009791  | -4.642497 |
| 765 | 1 | 0 | 10.933588 | 7.768547  | -4.199929 |
| 766 | 8 | 0 | 11.621870 | 0.207551  | -0.615037 |
| 767 | 7 | 0 | 9.504788  | -0.397587 | 0.024724  |
| 768 | 6 | 0 | 9.552405  | 2.245274  | -3.945718 |
| 769 | 6 | 0 | 9.488355  | -0.188971 | -3.391521 |
| 770 | 1 | 0 | 11.208240 | 1.097641  | -3.145230 |
| 771 | 6 | 0 | 10.585518 | 11.502594 | -0.884375 |
| 772 | 8 | 0 | 8.531771  | 10.257331 | -1.055536 |

|     |   |   |           |           |           |
|-----|---|---|-----------|-----------|-----------|
| 773 | 1 | 0 | 9.178447  | 8.779516  | -5.734824 |
| 774 | 1 | 0 | 8.177992  | 9.189521  | -4.278775 |
| 775 | 1 | 0 | 9.811206  | 9.945776  | -4.504874 |
| 776 | 1 | 0 | 8.502586  | -0.205937 | -0.073817 |
| 777 | 6 | 0 | 9.935110  | -1.439940 | 0.968548  |
| 778 | 6 | 0 | 10.031270 | 2.083260  | -5.366352 |
| 779 | 1 | 0 | 8.429604  | 2.229729  | -3.920694 |
| 780 | 1 | 0 | 9.878186  | 3.253639  | -3.575536 |
| 781 | 1 | 0 | 9.716940  | -0.441621 | -4.455940 |
| 782 | 1 | 0 | 9.916930  | -0.999677 | -2.751532 |
| 783 | 1 | 0 | 8.379065  | -0.175471 | -3.256932 |
| 784 | 1 | 0 | 10.128228 | 12.404792 | -1.303468 |
| 785 | 1 | 0 | 10.546296 | 11.590589 | 0.206867  |
| 786 | 1 | 0 | 11.625512 | 11.425470 | -1.211211 |
| 787 | 6 | 0 | 9.339289  | -2.798442 | 0.518251  |
| 788 | 6 | 0 | 9.491075  | -1.182065 | 2.407240  |
| 789 | 1 | 0 | 11.029105 | -1.474964 | 0.931046  |
| 790 | 1 | 0 | 9.717800  | 2.965129  | -5.976509 |
| 791 | 1 | 0 | 11.145488 | 2.007662  | -5.402380 |
| 792 | 1 | 0 | 9.601930  | 1.165519  | -5.835798 |
| 793 | 8 | 0 | 8.115118  | -2.940230 | 0.387256  |
| 794 | 7 | 0 | 10.249381 | -3.775576 | 0.309828  |
| 795 | 6 | 0 | 9.945946  | -2.317294 | 3.304236  |
| 796 | 6 | 0 | 10.043370 | 0.131098  | 2.922463  |
| 797 | 1 | 0 | 8.362768  | -1.137264 | 2.431965  |
| 798 | 1 | 0 | 11.245054 | -3.560637 | 0.405125  |
| 799 | 6 | 0 | 9.880709  | -5.165811 | -0.000635 |
| 800 | 1 | 0 | 9.700955  | -2.080864 | 4.368263  |
| 801 | 1 | 0 | 9.430449  | -3.270107 | 3.030967  |
| 802 | 1 | 0 | 11.049289 | -2.471455 | 3.219900  |
| 803 | 1 | 0 | 9.782414  | 0.258181  | 4.001191  |
| 804 | 1 | 0 | 11.155779 | 0.155008  | 2.820851  |
| 805 | 1 | 0 | 9.615216  | 0.994056  | 2.357916  |
| 806 | 6 | 0 | 10.298424 | -6.012835 | 1.228246  |
| 807 | 1 | 0 | 8.796728  | -5.199140 | -0.155248 |
| 808 | 8 | 0 | 11.496399 | -6.060875 | 1.555126  |
| 809 | 7 | 0 | 9.305947  | -6.638424 | 1.900928  |
| 810 | 6 | 0 | 10.387765 | -4.986366 | -2.462337 |
| 811 | 1 | 0 | 8.333105  | -6.511803 | 1.605878  |
| 812 | 6 | 0 | 9.610136  | -7.345141 | 3.152089  |
| 813 | 6 | 0 | 11.144391 | -3.836555 | -2.729963 |
| 814 | 6 | 0 | 8.991709  | -8.760779 | 3.170591  |
| 815 | 6 | 0 | 9.235297  | -6.595634 | 4.414936  |

|     |   |   |           |            |           |
|-----|---|---|-----------|------------|-----------|
| 816 | 1 | 0 | 10.700740 | -7.449969  | 3.171650  |
| 817 | 6 | 0 | 10.979793 | -3.138330  | -3.920360 |
| 818 | 1 | 0 | 11.878889 | -3.480426  | -1.987540 |
| 819 | 8 | 0 | 7.807356  | -8.991670  | 2.878908  |
| 820 | 7 | 0 | 9.860957  | -9.719092  | 3.562886  |
| 821 | 6 | 0 | 7.784489  | -6.186185  | 4.534987  |
| 822 | 1 | 0 | 9.512364  | -7.244944  | 5.290147  |
| 823 | 1 | 0 | 9.877883  | -5.671855  | 4.472519  |
| 824 | 6 | 0 | 10.044943 | -3.601919  | -4.861110 |
| 825 | 1 | 0 | 11.564257 | -2.231253  | -4.133630 |
| 826 | 1 | 0 | 10.834754 | -9.459210  | 3.721008  |
| 827 | 6 | 0 | 9.462190  | -11.112472 | 3.696499  |
| 828 | 6 | 0 | 7.565748  | -5.469236  | 5.852546  |
| 829 | 1 | 0 | 7.498717  | -5.511856  | 3.684202  |
| 830 | 1 | 0 | 7.126251  | -7.094111  | 4.468192  |
| 831 | 8 | 0 | 9.931347  | -2.873843  | -6.024097 |
| 832 | 1 | 0 | 10.235014 | -11.650124 | 4.252614  |
| 833 | 1 | 0 | 8.514733  | -11.185400 | 4.240310  |
| 834 | 1 | 0 | 9.331942  | -11.591712 | 2.717570  |
| 835 | 6 | 0 | 6.108099  | -5.043667  | 6.006635  |
| 836 | 1 | 0 | 7.855458  | -6.142105  | 6.702387  |
| 837 | 1 | 0 | 8.234058  | -4.567556  | 5.901342  |
| 838 | 1 | 0 | 9.193753  | -3.240105  | -6.533742 |
| 839 | 7 | 0 | 5.841789  | -4.373148  | 7.256333  |
| 840 | 1 | 0 | 5.829590  | -4.410883  | 5.107488  |
| 841 | 1 | 0 | 5.457370  | -5.966590  | 5.974753  |
| 842 | 1 | 0 | 6.407365  | -3.554756  | 7.356604  |
| 843 | 1 | 0 | 4.876085  | -4.119719  | 7.316499  |
| 844 | 6 | 0 | 9.284814  | -4.751951  | -4.609963 |
| 845 | 1 | 0 | 8.550960  | -5.105069  | -5.347854 |
| 846 | 6 | 0 | 9.459401  | -5.433354  | -3.407855 |
| 847 | 1 | 0 | 8.856494  | -6.331504  | -3.203072 |
| 848 | 6 | 0 | 10.605839 | -5.744681  | -1.203177 |
| 849 | 1 | 0 | 10.250496 | -6.804211  | -1.328423 |
| 850 | 1 | 0 | 11.710803 | -5.786510  | -0.984745 |
| 851 | 6 | 0 | 9.142844  | 6.561028   | -4.253191 |
| 852 | 1 | 0 | 9.657806  | 5.686332   | -3.785935 |
| 853 | 1 | 0 | 8.082861  | 6.582101   | -3.899944 |
| 854 | 1 | 0 | 9.145729  | 6.420369   | -5.360881 |
| 855 | 1 | 0 | 22.243844 | 5.054061   | 2.341772  |
| 856 | 7 | 0 | 21.319105 | 5.143085   | 2.735627  |
| 857 | 6 | 0 | 20.199202 | 4.819616   | 2.028037  |
| 858 | 1 | 0 | 21.214740 | 5.515710   | 3.670305  |

|     |   |   |           |           |           |
|-----|---|---|-----------|-----------|-----------|
| 859 | 6 | 0 | 20.422502 | 4.283841  | 0.618422  |
| 860 | 8 | 0 | 19.069384 | 4.951896  | 2.505096  |
| 861 | 6 | 0 | 19.724084 | 5.177786  | -0.424112 |
| 862 | 1 | 0 | 19.997143 | 3.271834  | 0.602957  |
| 863 | 1 | 0 | 21.492463 | 4.192068  | 0.394560  |
| 864 | 6 | 0 | 19.807180 | 4.629704  | -1.866047 |
| 865 | 1 | 0 | 20.179398 | 6.175066  | -0.423477 |
| 866 | 1 | 0 | 18.671037 | 5.295181  | -0.150068 |
| 867 | 7 | 0 | 19.186659 | 5.553286  | -2.805421 |
| 868 | 6 | 0 | 19.072858 | 3.283551  | -1.968321 |
| 869 | 1 | 0 | 20.856269 | 4.531792  | -2.163547 |
| 870 | 6 | 0 | 19.926829 | 6.347736  | -3.621194 |
| 871 | 1 | 0 | 18.166980 | 5.657971  | -2.795610 |
| 872 | 8 | 0 | 17.845381 | 3.240159  | -1.812756 |
| 873 | 7 | 0 | 19.838335 | 2.197179  | -2.216587 |
| 874 | 6 | 0 | 19.099876 | 7.252835  | -4.567424 |
| 875 | 8 | 0 | 21.162729 | 6.378910  | -3.628771 |
| 876 | 1 | 0 | 20.845950 | 2.291771  | -2.261520 |
| 877 | 6 | 0 | 19.304160 | 0.823439  | -2.244650 |
| 878 | 7 | 0 | 19.747310 | 8.571189  | -4.556712 |
| 879 | 6 | 0 | 19.024005 | 6.597423  | -5.944663 |
| 880 | 1 | 0 | 18.082300 | 7.383018  | -4.184326 |
| 881 | 6 | 0 | 19.994522 | 0.063275  | -1.078269 |
| 882 | 6 | 0 | 19.562060 | 0.086682  | -3.555695 |
| 883 | 1 | 0 | 18.224207 | 0.890643  | -2.076939 |
| 884 | 6 | 0 | 19.087634 | 9.723151  | -4.268855 |
| 885 | 1 | 0 | 20.758268 | 8.568495  | -4.619860 |
| 886 | 6 | 0 | 18.265501 | 5.286883  | -5.843593 |
| 887 | 6 | 0 | 18.345145 | 7.509005  | -6.947295 |
| 888 | 1 | 0 | 20.070457 | 6.383532  | -6.305189 |
| 889 | 8 | 0 | 21.207906 | 0.189886  | -0.881081 |
| 890 | 7 | 0 | 19.164614 | -0.708276 | -0.324790 |
| 891 | 6 | 0 | 18.891312 | 0.791126  | -4.729716 |
| 892 | 6 | 0 | 19.047585 | -1.336314 | -3.434431 |
| 893 | 1 | 0 | 20.673593 | 0.054307  | -3.742307 |
| 894 | 6 | 0 | 19.948445 | 10.976186 | -4.199288 |
| 895 | 8 | 0 | 17.865484 | 9.777551  | -4.072400 |
| 896 | 1 | 0 | 18.009443 | 4.913497  | -6.864482 |
| 897 | 1 | 0 | 18.884359 | 4.508714  | -5.335502 |
| 898 | 1 | 0 | 17.317812 | 5.423735  | -5.264488 |
| 899 | 1 | 0 | 18.193924 | 6.968552  | -7.913231 |
| 900 | 1 | 0 | 17.348905 | 7.839128  | -6.564059 |
| 901 | 1 | 0 | 18.965554 | 8.414206  | -7.150032 |

|     |   |   |           |           |           |
|-----|---|---|-----------|-----------|-----------|
| 902 | 1 | 0 | 18.153671 | -0.639546 | -0.469115 |
| 903 | 6 | 0 | 19.664803 | -1.440060 | 0.843136  |
| 904 | 6 | 0 | 19.493119 | 0.383250  | -6.051010 |
| 905 | 1 | 0 | 17.793680 | 0.552684  | -4.723976 |
| 906 | 1 | 0 | 18.983862 | 1.904265  | -4.625057 |
| 907 | 1 | 0 | 19.020331 | -1.824751 | -4.438332 |
| 908 | 1 | 0 | 19.714059 | -1.939364 | -2.771934 |
| 909 | 1 | 0 | 18.013739 | -1.345535 | -3.007048 |
| 910 | 1 | 0 | 19.568892 | 11.700638 | -4.926659 |
| 911 | 1 | 0 | 19.840709 | 11.419512 | -3.204194 |
| 912 | 1 | 0 | 21.008158 | 10.788882 | -4.397659 |
| 913 | 6 | 0 | 19.051693 | -2.862014 | 0.826952  |
| 914 | 6 | 0 | 19.333811 | -0.800433 | 2.194460  |
| 915 | 1 | 0 | 20.755739 | -1.477008 | 0.735791  |
| 916 | 1 | 0 | 18.977485 | 0.917284  | -6.885817 |
| 917 | 1 | 0 | 20.579718 | 0.639599  | -6.086779 |
| 918 | 1 | 0 | 19.387382 | -0.715416 | -6.220769 |
| 919 | 8 | 0 | 17.848999 | -3.028845 | 0.589272  |
| 920 | 7 | 0 | 19.913849 | -3.872108 | 1.100953  |
| 921 | 6 | 0 | 20.167726 | -1.433094 | 3.292144  |
| 922 | 6 | 0 | 19.574477 | 0.696499  | 2.171006  |
| 923 | 1 | 0 | 18.241858 | -0.980534 | 2.417574  |
| 924 | 1 | 0 | 20.846539 | -3.634407 | 1.422404  |
| 925 | 6 | 0 | 19.475391 | -5.239259 | 1.419990  |
| 926 | 1 | 0 | 19.952018 | -0.931015 | 4.266709  |
| 927 | 1 | 0 | 19.939629 | -2.520340 | 3.408151  |
| 928 | 1 | 0 | 21.257391 | -1.320436 | 3.074010  |
| 929 | 1 | 0 | 19.571384 | 1.102277  | 3.211621  |
| 930 | 1 | 0 | 20.560834 | 0.927157  | 1.698610  |
| 931 | 1 | 0 | 18.772471 | 1.217154  | 1.593507  |
| 932 | 6 | 0 | 19.788090 | -5.483240 | 2.921965  |
| 933 | 1 | 0 | 18.401201 | -5.308696 | 1.217820  |
| 934 | 8 | 0 | 20.827030 | -5.034015 | 3.416165  |
| 935 | 7 | 0 | 18.902455 | -6.265822 | 3.599345  |
| 936 | 6 | 0 | 20.136441 | -6.187208 | -0.822737 |
| 937 | 1 | 0 | 17.950692 | -6.374888 | 3.237700  |
| 938 | 6 | 0 | 19.182370 | -6.583917 | 5.002504  |
| 939 | 6 | 0 | 21.095310 | -5.435247 | -1.515438 |
| 940 | 6 | 0 | 18.452383 | -7.880661 | 5.412745  |
| 941 | 6 | 0 | 18.874700 | -5.481781 | 6.000777  |
| 942 | 1 | 0 | 20.266745 | -6.752804 | 5.062068  |
| 943 | 6 | 0 | 21.056767 | -5.331594 | -2.900677 |
| 944 | 1 | 0 | 21.889805 | -4.918398 | -0.955311 |

|     |   |   |           |            |           |
|-----|---|---|-----------|------------|-----------|
| 945 | 8 | 0 | 17.340460 | -8.198648  | 4.975033  |
| 946 | 7 | 0 | 19.117607 | -8.635000  | 6.323892  |
| 947 | 6 | 0 | 17.431887 | -5.027759  | 6.007803  |
| 948 | 1 | 0 | 19.156377 | -5.847626  | 7.024638  |
| 949 | 1 | 0 | 19.538049 | -4.603580  | 5.766423  |
| 950 | 6 | 0 | 20.039152 | -5.996152  | -3.605863 |
| 951 | 1 | 0 | 21.804346 | -4.743679  | -3.451043 |
| 952 | 1 | 0 | 20.041766 | -8.343064  | 6.610646  |
| 953 | 6 | 0 | 18.554510 | -9.854971  | 6.892509  |
| 954 | 6 | 0 | 17.208953 | -4.003439  | 7.100663  |
| 955 | 1 | 0 | 17.163575 | -4.583498  | 5.012473  |
| 956 | 1 | 0 | 16.755451 | -5.911763  | 6.162297  |
| 957 | 8 | 0 | 20.053788 | -5.863617  | -4.975020 |
| 958 | 1 | 0 | 19.188298 | -10.184890 | 7.719426  |
| 959 | 1 | 0 | 17.544745 | -9.667125  | 7.271238  |
| 960 | 1 | 0 | 18.502593 | -10.653903 | 6.143558  |
| 961 | 6 | 0 | 15.752364 | -3.543614  | 7.110810  |
| 962 | 1 | 0 | 17.472686 | -4.447205  | 8.096494  |
| 963 | 1 | 0 | 17.887289 | -3.125425  | 6.936241  |
| 964 | 1 | 0 | 19.277172 | -6.322256  | -5.327517 |
| 965 | 7 | 0 | 15.461966 | -2.607644  | 8.169256  |
| 966 | 1 | 0 | 15.507486 | -3.129801  | 6.084116  |
| 967 | 1 | 0 | 15.088994 | -4.445045  | 7.265374  |
| 968 | 1 | 0 | 16.047328 | -1.799191  | 8.109923  |
| 969 | 1 | 0 | 14.502220 | -2.328570  | 8.134800  |
| 970 | 6 | 0 | 19.074677 | -6.754604  | -2.928057 |
| 971 | 1 | 0 | 18.280306 | -7.269143  | -3.486550 |
| 972 | 6 | 0 | 19.129702 | -6.842132  | -1.539529 |
| 973 | 1 | 0 | 18.371853 | -7.434072  | -1.003186 |
| 974 | 6 | 0 | 20.218565 | -6.322990  | 0.654642  |
| 975 | 1 | 0 | 19.778603 | -7.309942  | 0.968118  |
| 976 | 1 | 0 | 21.300021 | -6.324614  | 0.966459  |
| 977 | 1 | 0 | 17.325415 | 5.020921   | 3.200569  |
| 978 | 7 | 0 | 16.386850 | 5.036481   | 3.594855  |
| 979 | 6 | 0 | 15.287469 | 4.699455   | 2.877127  |
| 980 | 1 | 0 | 16.249333 | 5.347243   | 4.547518  |
| 981 | 6 | 0 | 15.533623 | 4.275594   | 1.433229  |
| 982 | 8 | 0 | 14.144517 | 4.734749   | 3.354305  |
| 983 | 6 | 0 | 14.858892 | 5.253987   | 0.452787  |
| 984 | 1 | 0 | 15.100843 | 3.273688   | 1.319707  |
| 985 | 1 | 0 | 16.607307 | 4.202939   | 1.228373  |
| 986 | 6 | 0 | 15.015698 | 4.837280   | -1.024419 |
| 987 | 1 | 0 | 15.298225 | 6.252637   | 0.565910  |

|      |   |   |           |           |           |
|------|---|---|-----------|-----------|-----------|
| 988  | 1 | 0 | 13.794241 | 5.335300  | 0.694792  |
| 989  | 7 | 0 | 14.452464 | 5.863779  | -1.898535 |
| 990  | 6 | 0 | 14.289153 | 3.504239  | -1.289501 |
| 991  | 1 | 0 | 16.073138 | 4.741291  | -1.276769 |
| 992  | 6 | 0 | 15.204652 | 6.556379  | -2.780283 |
| 993  | 1 | 0 | 13.452348 | 6.078756  | -1.818304 |
| 994  | 8 | 0 | 13.059111 | 3.434956  | -1.158709 |
| 995  | 7 | 0 | 15.078427 | 2.463060  | -1.639163 |
| 996  | 6 | 0 | 14.454185 | 7.647515  | -3.584503 |
| 997  | 8 | 0 | 16.423356 | 6.370754  | -2.950763 |
| 998  | 1 | 0 | 16.082045 | 2.619561  | -1.750332 |
| 999  | 6 | 0 | 14.538540 | 1.127038  | -1.956421 |
| 1000 | 7 | 0 | 15.098194 | 8.941686  | -3.311065 |
| 1001 | 6 | 0 | 14.458012 | 7.245549  | -5.056994 |
| 1002 | 1 | 0 | 13.418333 | 7.728454  | -3.236490 |
| 1003 | 6 | 0 | 15.190681 | 0.124298  | -0.968177 |
| 1004 | 6 | 0 | 14.828311 | 0.660493  | -3.380878 |
| 1005 | 1 | 0 | 13.455345 | 1.169137  | -1.800554 |
| 1006 | 6 | 0 | 14.420996 | 9.990787  | -2.772865 |
| 1007 | 1 | 0 | 16.066660 | 9.081017  | -3.601171 |
| 1008 | 6 | 0 | 13.729426 | 5.925780  | -5.226078 |
| 1009 | 6 | 0 | 13.806782 | 8.306555  | -5.919951 |
| 1010 | 1 | 0 | 15.528501 | 7.110955  | -5.390224 |
| 1011 | 8 | 0 | 16.425650 | -0.013699 | -0.940721 |
| 1012 | 7 | 0 | 14.334321 | -0.536487 | -0.156449 |
| 1013 | 6 | 0 | 14.207265 | 1.594551  | -4.411158 |
| 1014 | 6 | 0 | 14.298655 | -0.750042 | -3.558308 |
| 1015 | 1 | 0 | 15.947134 | 0.645220  | -3.531161 |
| 1016 | 6 | 0 | 15.237584 | 11.256480 | -2.560925 |
| 1017 | 8 | 0 | 13.223902 | 9.944418  | -2.451146 |
| 1018 | 1 | 0 | 13.674087 | 5.656945  | -6.308410 |
| 1019 | 1 | 0 | 14.265709 | 5.106780  | -4.687502 |
| 1020 | 1 | 0 | 12.689415 | 5.997078  | -4.822986 |
| 1021 | 1 | 0 | 13.714874 | 7.939136  | -6.970920 |
| 1022 | 1 | 0 | 12.784859 | 8.548309  | -5.538204 |
| 1023 | 1 | 0 | 14.414737 | 9.242482  | -5.930121 |
| 1024 | 1 | 0 | 13.329096 | -0.352112 | -0.234600 |
| 1025 | 6 | 0 | 14.810514 | -1.448796 | 0.893795  |
| 1026 | 6 | 0 | 14.774077 | 1.373737  | -5.791108 |
| 1027 | 1 | 0 | 13.095228 | 1.437333  | -4.427727 |
| 1028 | 1 | 0 | 14.383599 | 2.664340  | -4.121377 |
| 1029 | 1 | 0 | 14.435337 | -1.087378 | -4.614765 |
| 1030 | 1 | 0 | 14.851792 | -1.464207 | -2.898620 |

|      |   |   |           |           |           |
|------|---|---|-----------|-----------|-----------|
| 1031 | 1 | 0 | 13.210651 | -0.797574 | -3.306967 |
| 1032 | 1 | 0 | 14.711241 | 12.089447 | -3.037861 |
| 1033 | 1 | 0 | 15.276260 | 11.465451 | -1.486102 |
| 1034 | 1 | 0 | 16.251974 | 11.179364 | -2.958971 |
| 1035 | 6 | 0 | 14.200682 | -2.856228 | 0.664457  |
| 1036 | 6 | 0 | 14.444842 | -0.997574 | 2.307510  |
| 1037 | 1 | 0 | 15.901117 | -1.492285 | 0.805773  |
| 1038 | 1 | 0 | 14.352972 | 2.126211  | -6.501298 |
| 1039 | 1 | 0 | 15.886623 | 1.479471  | -5.783003 |
| 1040 | 1 | 0 | 14.522530 | 0.354853  | -6.172701 |
| 1041 | 8 | 0 | 12.977959 | -3.004492 | 0.535483  |
| 1042 | 7 | 0 | 15.100757 | -3.866867 | 0.651669  |
| 1043 | 6 | 0 | 14.952059 | -2.003436 | 3.323127  |
| 1044 | 6 | 0 | 15.023398 | 0.369828  | 2.609758  |
| 1045 | 1 | 0 | 13.319949 | -0.941742 | 2.388158  |
| 1046 | 1 | 0 | 16.097899 | -3.643336 | 0.672855  |
| 1047 | 6 | 0 | 14.722746 | -5.286227 | 0.549468  |
| 1048 | 1 | 0 | 14.802416 | -1.610006 | 4.357977  |
| 1049 | 1 | 0 | 14.398893 | -2.969860 | 3.235191  |
| 1050 | 1 | 0 | 16.041893 | -2.199750 | 3.173374  |
| 1051 | 1 | 0 | 14.819356 | 0.643980  | 3.673320  |
| 1052 | 1 | 0 | 16.129238 | 0.371979  | 2.448229  |
| 1053 | 1 | 0 | 14.565836 | 1.151059  | 1.956345  |
| 1054 | 6 | 0 | 15.128345 | -5.961973 | 1.886919  |
| 1055 | 1 | 0 | 13.638365 | -5.330087 | 0.398334  |
| 1056 | 8 | 0 | 16.329958 | -6.023049 | 2.202450  |
| 1057 | 7 | 0 | 14.120680 | -6.435559 | 2.655549  |
| 1058 | 6 | 0 | 15.300871 | -5.425013 | -1.902162 |
| 1059 | 1 | 0 | 13.148349 | -6.325183 | 2.350813  |
| 1060 | 6 | 0 | 14.413686 | -6.988037 | 3.984526  |
| 1061 | 6 | 0 | 16.135499 | -4.364330 | -2.283632 |
| 1062 | 6 | 0 | 13.771283 | -8.382534 | 4.170671  |
| 1063 | 6 | 0 | 14.053544 | -6.086193 | 5.148260  |
| 1064 | 1 | 0 | 15.501445 | -7.109581 | 4.015430  |
| 1065 | 6 | 0 | 16.037387 | -3.802818 | -3.551064 |
| 1066 | 1 | 0 | 16.879093 | -3.967962 | -1.570219 |
| 1067 | 8 | 0 | 12.581667 | -8.625475 | 3.915681  |
| 1068 | 7 | 0 | 14.625387 | -9.311326 | 4.656543  |
| 1069 | 6 | 0 | 12.609112 | -5.642996 | 5.211815  |
| 1070 | 1 | 0 | 14.316322 | -6.633421 | 6.094890  |
| 1071 | 1 | 0 | 14.712866 | -5.173683 | 5.103814  |
| 1072 | 6 | 0 | 15.090783 | -4.315245 | -4.454228 |
| 1073 | 1 | 0 | 16.686427 | -2.968113 | -3.855220 |



|      |   |   |           |            |           |
|------|---|---|-----------|------------|-----------|
| 1074 | 1 | 0 | 15.600028 | -9.051643  | 4.799637  |
| 1075 | 6 | 0 | 14.197743 | -10.675306 | 4.933353  |
| 1076 | 6 | 0 | 12.395671 | -4.768900  | 6.431428  |
| 1077 | 1 | 0 | 12.335030 | -5.073485  | 4.284069  |
| 1078 | 1 | 0 | 11.938154 | -6.543409  | 5.252387  |
| 1079 | 8 | 0 | 15.038599 | -3.718763  | -5.693677 |
| 1080 | 1 | 0 | 15.035977 | -11.225351 | 5.368972  |
| 1081 | 1 | 0 | 13.359253 | -10.686476 | 5.639094  |
| 1082 | 1 | 0 | 13.878504 | -11.184507 | 4.016039  |
| 1083 | 6 | 0 | 10.938494 | -4.325820  | 6.533952  |
| 1084 | 1 | 0 | 12.685205 | -5.332436  | 7.357475  |
| 1085 | 1 | 0 | 13.066089 | -3.869901  | 6.368056  |
| 1086 | 1 | 0 | 14.301836 | -4.112989  | -6.183156 |
| 1087 | 7 | 0 | 10.678032 | -3.494792  | 7.684443  |
| 1088 | 1 | 0 | 10.655764 | -3.818547  | 5.559716  |
| 1089 | 1 | 0 | 10.288172 | -5.244806  | 6.628080  |
| 1090 | 1 | 0 | 11.238393 | -2.666898  | 7.668192  |
| 1091 | 1 | 0 | 9.711051  | -3.241560  | 7.719348  |
| 1092 | 6 | 0 | 14.256708 | -5.381082  | -4.090874 |
| 1093 | 1 | 0 | 13.516581 | -5.774679  | -4.801450 |
| 1094 | 6 | 0 | 14.365913 | -5.925440  | -2.813537 |
| 1095 | 1 | 0 | 13.704770 | -6.755870  | -2.521466 |
| 1096 | 6 | 0 | 15.445039 | -6.037811  | -0.556039 |
| 1097 | 1 | 0 | 15.039272 | -7.086348  | -0.566959 |
| 1098 | 1 | 0 | 16.541370 | -6.106200  | -0.300690 |

P PI (Ac-VQIVYK-NHMe)<sub>10</sub>

|    |   |   |            |           |           |
|----|---|---|------------|-----------|-----------|
| 1  | 6 | 0 | -20.764635 | 9.555127  | 7.125600  |
| 2  | 6 | 0 | -21.438791 | 8.999542  | 5.877638  |
| 3  | 1 | 0 | -21.308712 | 10.450999 | 7.442933  |
| 4  | 1 | 0 | -20.856031 | 8.814518  | 7.927100  |
| 5  | 1 | 0 | -19.710516 | 9.797676  | 6.965049  |
| 6  | 8 | 0 | -22.630302 | 8.674311  | 5.867100  |
| 7  | 7 | 0 | -20.622812 | 8.896601  | 4.785379  |
| 8  | 1 | 0 | -19.631066 | 9.130257  | 4.860464  |
| 9  | 6 | 0 | -21.123026 | 8.336098  | 3.526083  |
| 10 | 6 | 0 | -20.562990 | 6.898980  | 3.400098  |
| 11 | 6 | 0 | -20.720598 | 9.124242  | 2.284991  |
| 12 | 1 | 0 | -22.216634 | 8.321955  | 3.612065  |
| 13 | 8 | 0 | -19.348517 | 6.710818  | 3.233246  |
| 14 | 7 | 0 | -21.460154 | 5.894702  | 3.533765  |
| 15 | 6 | 0 | -21.372506 | 8.512468  | 1.059721  |
| 16 | 6 | 0 | -21.106386 | 10.584000 | 2.403060  |
| 17 | 1 | 0 | -19.598939 | 9.054060  | 2.166885  |
| 18 | 1 | 0 | -22.440281 | 6.119991  | 3.657530  |
| 19 | 6 | 0 | -21.094710 | 4.479031  | 3.491601  |
| 20 | 1 | 0 | -21.044186 | 9.058423  | 0.142708  |
| 21 | 1 | 0 | -21.082526 | 7.438562  | 0.954234  |
| 22 | 1 | 0 | -22.485090 | 8.577299  | 1.129880  |
| 23 | 1 | 0 | -20.931941 | 11.102803 | 1.429158  |
| 24 | 1 | 0 | -22.185623 | 10.685944 | 2.670743  |
| 25 | 1 | 0 | -20.495115 | 11.094303 | 3.185519  |
| 26 | 6 | 0 | -21.786072 | 3.831846  | 2.274464  |
| 27 | 6 | 0 | -21.506961 | 3.769860  | 4.798668  |
| 28 | 1 | 0 | -20.010150 | 4.442661  | 3.370368  |
| 29 | 8 | 0 | -23.000241 | 3.951448  | 2.092178  |
| 30 | 7 | 0 | -20.953529 | 3.111296  | 1.469076  |
| 31 | 6 | 0 | -20.969307 | 2.330810  | 4.897233  |
| 32 | 1 | 0 | -21.116714 | 4.363121  | 5.635166  |
| 33 | 1 | 0 | -22.598950 | 3.754416  | 4.886297  |
| 34 | 1 | 0 | -19.942881 | 3.180042  | 1.607949  |
| 35 | 6 | 0 | -21.435832 | 2.448108  | 0.250142  |
| 36 | 6 | 0 | -21.405724 | 1.676425  | 6.210801  |
| 37 | 1 | 0 | -21.384749 | 1.719876  | 4.085936  |
| 38 | 1 | 0 | -19.877871 | 2.318130  | 4.799544  |
| 39 | 6 | 0 | -20.824023 | 1.028635  | 0.246310  |
| 40 | 6 | 0 | -21.046284 | 3.158314  | -1.046560 |
| 41 | 1 | 0 | -22.529926 | 2.417791  | 0.322245  |

|    |   |   |            |           |           |
|----|---|---|------------|-----------|-----------|
| 42 | 8 | 0 | -22.594002 | 1.569767  | 6.521152  |
| 43 | 7 | 0 | -20.387477 | 1.218054  | 6.995719  |
| 44 | 8 | 0 | -19.595417 | 0.879840  | 0.290293  |
| 45 | 7 | 0 | -21.698044 | -0.006741 | 0.208404  |
| 46 | 6 | 0 | -21.846173 | 4.444935  | -1.210479 |
| 47 | 6 | 0 | -21.261498 | 2.240995  | -2.233499 |
| 48 | 1 | 0 | -19.946870 | 3.414105  | -1.000110 |
| 49 | 1 | 0 | -20.641114 | 0.821517  | 7.890418  |
| 50 | 1 | 0 | -19.406722 | 1.377034  | 6.772964  |
| 51 | 1 | 0 | -22.694814 | 0.173408  | 0.187631  |
| 52 | 6 | 0 | -21.269188 | -1.417905 | 0.217025  |
| 53 | 6 | 0 | -21.157052 | 5.424080  | -2.126259 |
| 54 | 1 | 0 | -22.863601 | 4.198382  | -1.614998 |
| 55 | 1 | 0 | -22.003462 | 4.927788  | -0.208512 |
| 56 | 1 | 0 | -21.129567 | 2.809132  | -3.186334 |
| 57 | 1 | 0 | -20.518223 | 1.405388  | -2.218903 |
| 58 | 1 | 0 | -22.290575 | 1.805762  | -2.224715 |
| 59 | 6 | 0 | -21.961258 | -2.112575 | -0.984892 |
| 60 | 6 | 0 | -21.638239 | -2.168048 | 1.493227  |
| 61 | 1 | 0 | -20.181113 | -1.417644 | 0.098954  |
| 62 | 1 | 0 | -21.757933 | 6.362287  | -2.205424 |
| 63 | 1 | 0 | -20.143515 | 5.685623  | -1.734682 |
| 64 | 1 | 0 | -21.035771 | 4.997534  | -3.151302 |
| 65 | 8 | 0 | -23.189861 | -2.105969 | -1.094558 |
| 66 | 7 | 0 | -21.106371 | -2.696714 | -1.872727 |
| 67 | 6 | 0 | -21.106241 | -3.586691 | 1.417813  |
| 68 | 6 | 0 | -21.084537 | -1.476678 | 2.722297  |
| 69 | 1 | 0 | -22.762524 | -2.210183 | 1.575115  |
| 70 | 1 | 0 | -20.098729 | -2.634429 | -1.714252 |
| 71 | 6 | 0 | -21.592635 | -3.409827 | -3.049436 |
| 72 | 1 | 0 | -21.337282 | -4.129536 | 2.365762  |
| 73 | 1 | 0 | -21.578115 | -4.139617 | 0.570221  |
| 74 | 1 | 0 | -19.998642 | -3.582853 | 1.269042  |
| 75 | 1 | 0 | -21.258703 | -2.109610 | 3.626161  |
| 76 | 1 | 0 | -19.985755 | -1.305063 | 2.613999  |
| 77 | 1 | 0 | -21.582504 | -0.491223 | 2.888982  |
| 78 | 6 | 0 | -20.967710 | -4.828550 | -3.103553 |
| 79 | 6 | 0 | -21.294630 | -2.733237 | -4.385072 |
| 80 | 1 | 0 | -22.681941 | -3.487348 | -2.933937 |
| 81 | 8 | 0 | -19.840017 | -5.065639 | -2.651921 |
| 82 | 7 | 0 | -21.748885 | -5.761928 | -3.704042 |
| 83 | 6 | 0 | -22.323722 | -1.722097 | -4.749104 |
| 84 | 1 | 0 | -20.275581 | -2.254563 | -4.366273 |

|     |   |   |            |            |           |
|-----|---|---|------------|------------|-----------|
| 85  | 1 | 0 | -21.264157 | -3.517263  | -5.192220 |
| 86  | 1 | 0 | -22.587597 | -5.450289  | -4.183135 |
| 87  | 6 | 0 | -21.235072 | -7.070574  | -4.130894 |
| 88  | 6 | 0 | -22.148033 | -0.372183  | -4.421747 |
| 89  | 6 | 0 | -23.472240 | -2.115121  | -5.446738 |
| 90  | 6 | 0 | -21.117033 | -7.066113  | -5.680498 |
| 91  | 6 | 0 | -22.091821 | -8.241320  | -3.693892 |
| 92  | 1 | 0 | -20.242535 | -7.190617  | -3.680608 |
| 93  | 6 | 0 | -23.096523 | 0.578616   | -4.782907 |
| 94  | 1 | 0 | -21.253181 | -0.054458  | -3.861990 |
| 95  | 6 | 0 | -24.433725 | -1.179717  | -5.817508 |
| 96  | 1 | 0 | -23.617031 | -3.174736  | -5.709327 |
| 97  | 8 | 0 | -21.945990 | -6.470456  | -6.377236 |
| 98  | 7 | 0 | -20.064933 | -7.776045  | -6.157363 |
| 99  | 6 | 0 | -23.542865 | -8.134396  | -4.112654 |
| 100 | 1 | 0 | -21.639370 | -9.172871  | -4.130267 |
| 101 | 1 | 0 | -22.034259 | -8.336294  | -2.575014 |
| 102 | 6 | 0 | -24.241989 | 0.168574   | -5.483791 |
| 103 | 1 | 0 | -22.965146 | 1.638489   | -4.521133 |
| 104 | 1 | 0 | -25.334761 | -1.494268  | -6.361969 |
| 105 | 1 | 0 | -19.359465 | -8.095489  | -5.493202 |
| 106 | 6 | 0 | -19.807331 | -7.912904  | -7.582445 |
| 107 | 6 | 0 | -24.263484 | -9.448388  | -3.898249 |
| 108 | 1 | 0 | -24.051749 | -7.329149  | -3.519535 |
| 109 | 1 | 0 | -23.602930 | -7.838543  | -5.194951 |
| 110 | 8 | 0 | -25.140620 | 1.153582   | -5.825058 |
| 111 | 1 | 0 | -19.580014 | -8.956508  | -7.830353 |
| 112 | 1 | 0 | -20.700130 | -7.597846  | -8.126726 |
| 113 | 1 | 0 | -18.964297 | -7.284960  | -7.900715 |
| 114 | 6 | 0 | -25.734523 | -9.310180  | -4.287585 |
| 115 | 1 | 0 | -23.781026 | -10.251430 | -4.514747 |
| 116 | 1 | 0 | -24.177315 | -9.754657  | -2.822726 |
| 117 | 1 | 0 | -25.904265 | 0.728168   | -6.241027 |
| 118 | 7 | 0 | -26.480101 | -10.539419 | -4.154348 |
| 119 | 1 | 0 | -26.178802 | -8.467513  | -3.676718 |
| 120 | 1 | 0 | -25.794792 | -8.998146  | -5.369792 |
| 121 | 1 | 0 | -26.346218 | -10.946073 | -3.250098 |
| 122 | 1 | 0 | -27.455583 | -10.370016 | -4.296974 |
| 123 | 1 | 0 | -17.643667 | 6.086966   | 3.171348  |
| 124 | 7 | 0 | -16.638719 | 5.889243   | 3.127430  |
| 125 | 6 | 0 | -15.769522 | 6.918708   | 3.039940  |
| 126 | 6 | 0 | -16.204449 | 4.493351   | 3.181549  |
| 127 | 6 | 0 | -16.399458 | 8.333529   | 3.041463  |

|     |   |   |            |           |           |
|-----|---|---|------------|-----------|-----------|
| 128 | 8 | 0 | -14.536035 | 6.785533  | 2.979961  |
| 129 | 6 | 0 | -16.920911 | 3.718904  | 2.058712  |
| 130 | 6 | 0 | -16.528341 | 3.874047  | 4.555741  |
| 131 | 1 | 0 | -15.126364 | 4.484546  | 3.009332  |
| 132 | 7 | 0 | -15.816060 | 9.078215  | 4.166568  |
| 133 | 6 | 0 | -16.154521 | 8.970816  | 1.675242  |
| 134 | 1 | 0 | -17.478511 | 8.272047  | 3.219411  |
| 135 | 8 | 0 | -18.155331 | 3.609102  | 2.062286  |
| 136 | 7 | 0 | -16.111957 | 3.183615  | 1.113857  |
| 137 | 6 | 0 | -16.030396 | 2.422214  | 4.687331  |
| 138 | 1 | 0 | -16.057733 | 4.498828  | 5.324680  |
| 139 | 1 | 0 | -17.610271 | 3.903626  | 4.721054  |
| 140 | 1 | 0 | -14.803392 | 9.217979  | 4.184782  |
| 141 | 6 | 0 | -16.577669 | 9.645565  | 5.136677  |
| 142 | 6 | 0 | -16.831181 | 8.143192  | 0.599469  |
| 143 | 6 | 0 | -16.669889 | 10.394575 | 1.631429  |
| 144 | 1 | 0 | -15.042781 | 8.981266  | 1.476858  |
| 145 | 1 | 0 | -15.102074 | 3.334892  | 1.178417  |
| 146 | 6 | 0 | -16.644147 | 2.462640  | -0.054280 |
| 147 | 6 | 0 | -16.420791 | 1.834323  | 6.039707  |
| 148 | 1 | 0 | -16.507819 | 1.795738  | 3.923621  |
| 149 | 1 | 0 | -14.945818 | 2.370928  | 4.544167  |
| 150 | 6 | 0 | -15.803236 | 10.363920 | 6.231994  |
| 151 | 8 | 0 | -17.817734 | 9.586255  | 5.166374  |
| 152 | 1 | 0 | -16.719355 | 8.641195  | -0.393616 |
| 153 | 1 | 0 | -16.371049 | 7.126967  | 0.536494  |
| 154 | 1 | 0 | -17.920898 | 8.027385  | 0.820303  |
| 155 | 1 | 0 | -16.593952 | 10.796092 | 0.591788  |
| 156 | 1 | 0 | -17.740286 | 10.434079 | 1.950144  |
| 157 | 1 | 0 | -16.073438 | 11.055351 | 2.304804  |
| 158 | 6 | 0 | -16.024728 | 1.041668  | -0.034807 |
| 159 | 6 | 0 | -16.323741 | 3.118071  | -1.395954 |
| 160 | 1 | 0 | -17.730675 | 2.408525  | 0.071068  |
| 161 | 8 | 0 | -17.606886 | 1.674121  | 6.358277  |
| 162 | 7 | 0 | -15.391871 | 1.505316  | 6.859281  |
| 163 | 1 | 0 | -16.199430 | 11.380249 | 6.326021  |
| 164 | 1 | 0 | -15.991015 | 9.848741  | 7.180547  |
| 165 | 1 | 0 | -14.728528 | 10.396996 | 6.036414  |
| 166 | 8 | 0 | -14.792924 | 0.896779  | -0.103367 |
| 167 | 7 | 0 | -16.904558 | 0.023020  | 0.086290  |
| 168 | 6 | 0 | -16.862513 | 4.541262  | -1.466164 |
| 169 | 6 | 0 | -16.916479 | 2.277256  | -2.510736 |
| 170 | 1 | 0 | -15.202049 | 3.147736  | -1.520873 |

|     |   |   |            |           |           |
|-----|---|---|------------|-----------|-----------|
| 171 | 1 | 0 | -15.621885 | 1.148104  | 7.776962  |
| 172 | 1 | 0 | -14.417549 | 1.669564  | 6.603549  |
| 173 | 1 | 0 | -17.903343 | 0.233192  | 0.168211  |
| 174 | 6 | 0 | -16.472075 | -1.378701 | 0.195360  |
| 175 | 6 | 0 | -16.285104 | 5.313369  | -2.625825 |
| 176 | 1 | 0 | -17.982099 | 4.509167  | -1.551079 |
| 177 | 1 | 0 | -16.620238 | 5.093355  | -0.519407 |
| 178 | 1 | 0 | -16.747014 | 2.773575  | -3.496802 |
| 179 | 1 | 0 | -16.439407 | 1.266727  | -2.541666 |
| 180 | 1 | 0 | -18.017354 | 2.147122  | -2.364513 |
| 181 | 6 | 0 | -17.114963 | -2.190448 | -0.959350 |
| 182 | 6 | 0 | -16.868762 | -2.043194 | 1.512630  |
| 183 | 1 | 0 | -15.381212 | -1.387895 | 0.103279  |
| 184 | 1 | 0 | -16.616874 | 6.379154  | -2.576043 |
| 185 | 1 | 0 | -15.168104 | 5.290612  | -2.598911 |
| 186 | 1 | 0 | -16.621085 | 4.889192  | -3.602491 |
| 187 | 8 | 0 | -18.345220 | -2.223085 | -1.102746 |
| 188 | 7 | 0 | -16.236425 | -2.848483 | -1.753084 |
| 189 | 6 | 0 | -16.369421 | -3.475542 | 1.534615  |
| 190 | 6 | 0 | -16.312795 | -1.286353 | 2.701106  |
| 191 | 1 | 0 | -17.996055 | -2.054611 | 1.584256  |
| 192 | 1 | 0 | -15.233500 | -2.754517 | -1.573011 |
| 193 | 6 | 0 | -16.671546 | -3.759880 | -2.817073 |
| 194 | 1 | 0 | -16.569646 | -3.934256 | 2.532998  |
| 195 | 1 | 0 | -16.890043 | -4.087021 | 0.758294  |
| 196 | 1 | 0 | -15.269503 | -3.512289 | 1.340003  |
| 197 | 1 | 0 | -16.528000 | -1.845727 | 3.643883  |
| 198 | 1 | 0 | -15.206402 | -1.163451 | 2.605580  |
| 199 | 1 | 0 | -16.777818 | -0.274541 | 2.785160  |
| 200 | 6 | 0 | -16.172883 | -5.187173 | -2.475724 |
| 201 | 6 | 0 | -16.127321 | -3.424789 | -4.197028 |
| 202 | 1 | 0 | -17.766295 | -3.733444 | -2.838738 |
| 203 | 8 | 0 | -14.969468 | -5.401667 | -2.257674 |
| 204 | 7 | 0 | -17.129414 | -6.142929 | -2.461353 |
| 205 | 6 | 0 | -16.794278 | -2.248004 | -4.814129 |
| 206 | 1 | 0 | -15.016046 | -3.251052 | -4.141973 |
| 207 | 1 | 0 | -16.286158 | -4.325664 | -4.852630 |
| 208 | 1 | 0 | -18.109440 | -5.871555 | -2.570255 |
| 209 | 6 | 0 | -16.800885 | -7.545734 | -2.179876 |
| 210 | 6 | 0 | -16.293161 | -0.956131 | -4.605629 |
| 211 | 6 | 0 | -17.913355 | -2.425245 | -5.634886 |
| 212 | 6 | 0 | -17.054586 | -8.422650 | -3.432049 |
| 213 | 6 | 0 | -17.528972 | -8.129120 | -0.986236 |

|     |   |   |            |            |           |
|-----|---|---|------------|------------|-----------|
| 214 | 1 | 0 | -15.728190 | -7.566312  | -1.950392 |
| 215 | 6 | 0 | -16.885301 | 0.143850   | -5.215503 |
| 216 | 1 | 0 | -15.421908 | -0.809320  | -3.946987 |
| 217 | 6 | 0 | -18.522470 | -1.336441  | -6.253382 |
| 218 | 1 | 0 | -18.320491 | -3.435443  | -5.796180 |
| 219 | 8 | 0 | -18.089554 | -8.322879  | -4.110508 |
| 220 | 7 | 0 | -16.071233 | -9.306694  | -3.700418 |
| 221 | 6 | 0 | -19.037529 | -8.148463  | -1.103148 |
| 222 | 1 | 0 | -17.151856 | -9.177750  | -0.839039 |
| 223 | 1 | 0 | -17.240686 | -7.541674  | -0.071083 |
| 224 | 6 | 0 | -18.002442 | -0.051945  | -6.044241 |
| 225 | 1 | 0 | -16.499979 | 1.160709   | -5.051957 |
| 226 | 1 | 0 | -19.403681 | -1.482393  | -6.893808 |
| 227 | 1 | 0 | -15.195923 | -9.247431  | -3.176930 |
| 228 | 6 | 0 | -16.158683 | -10.233500 | -4.819126 |
| 229 | 6 | 0 | -19.647227 | -8.797832  | 0.122125  |
| 230 | 1 | 0 | -19.433178 | -7.102542  | -1.214773 |
| 231 | 1 | 0 | -19.338445 | -8.710763  | -2.027969 |
| 232 | 8 | 0 | -18.538504 | 1.071711   | -6.630904 |
| 233 | 1 | 0 | -15.453928 | -11.054072 | -4.656536 |
| 234 | 1 | 0 | -17.172728 | -10.637452 | -4.890869 |
| 235 | 1 | 0 | -15.918025 | -9.745055  | -5.772997 |
| 236 | 6 | 0 | -21.166089 | -8.878297  | -0.015670 |
| 237 | 1 | 0 | -19.225941 | -9.828511  | 0.257104  |
| 238 | 1 | 0 | -19.373558 | -8.204009  | 1.033882  |
| 239 | 1 | 0 | -19.334887 | 0.805029   | -7.113073 |
| 240 | 7 | 0 | -21.818590 | -9.456265  | 1.135802  |
| 241 | 1 | 0 | -21.551054 | -7.841842  | -0.256328 |
| 242 | 1 | 0 | -21.413465 | -9.535707  | -0.898987 |
| 243 | 1 | 0 | -21.489167 | -9.040521  | 1.984212  |
| 244 | 1 | 0 | -22.808877 | -9.329378  | 1.072220  |
| 245 | 1 | 0 | -9.532333  | 2.172249   | 6.297671  |
| 246 | 7 | 0 | -10.501245 | 1.978205   | 6.556803  |
| 247 | 6 | 0 | -11.533879 | 2.187062   | 5.706664  |
| 248 | 1 | 0 | -10.723487 | 1.687608   | 7.499677  |
| 249 | 6 | 0 | -11.163036 | 2.688870   | 4.315273  |
| 250 | 8 | 0 | -12.715567 | 1.992080   | 6.029401  |
| 251 | 6 | 0 | -11.688348 | 4.120557   | 4.095774  |
| 252 | 1 | 0 | -11.631892 | 2.005344   | 3.596537  |
| 253 | 1 | 0 | -10.078444 | 2.650419   | 4.168770  |
| 254 | 6 | 0 | -11.382701 | 4.667041   | 2.686682  |
| 255 | 1 | 0 | -11.226523 | 4.799309   | 4.823206  |
| 256 | 1 | 0 | -12.769920 | 4.142488   | 4.265277  |

|     |   |   |            |           |           |
|-----|---|---|------------|-----------|-----------|
| 257 | 7 | 0 | -11.834720 | 6.051652  | 2.571235  |
| 258 | 6 | 0 | -12.099116 | 3.827330  | 1.609941  |
| 259 | 1 | 0 | -10.306317 | 4.660181  | 2.503960  |
| 260 | 6 | 0 | -10.991928 | 7.076453  | 2.321553  |
| 261 | 1 | 0 | -12.831989 | 6.245531  | 2.712186  |
| 262 | 8 | 0 | -13.335709 | 3.736819  | 1.606109  |
| 263 | 7 | 0 | -11.289320 | 3.215905  | 0.715639  |
| 264 | 6 | 0 | -11.645868 | 8.479029  | 2.267408  |
| 265 | 8 | 0 | -9.766633  | 6.949956  | 2.161205  |
| 266 | 1 | 0 | -10.277594 | 3.354849  | 0.783416  |
| 267 | 6 | 0 | -11.812699 | 2.395888  | -0.390739 |
| 268 | 7 | 0 | -11.023054 | 9.301616  | 3.314791  |
| 269 | 6 | 0 | -11.477953 | 9.035215  | 0.855538  |
| 270 | 1 | 0 | -12.713406 | 8.411911  | 2.504734  |
| 271 | 6 | 0 | -11.215199 | 0.976000  | -0.221465 |
| 272 | 6 | 0 | -11.450947 | 2.917314  | -1.779519 |
| 273 | 1 | 0 | -12.902680 | 2.367051  | -0.288092 |
| 274 | 1 | 0 | -10.017348 | 9.478456  | 3.262127  |
| 275 | 6 | 0 | -11.743233 | 9.878131  | 4.310554  |
| 276 | 6 | 0 | -12.174921 | 8.126337  | -0.138692 |
| 277 | 6 | 0 | -12.037487 | 10.438744 | 0.747119  |
| 278 | 1 | 0 | -10.376307 | 9.061565  | 0.608303  |
| 279 | 8 | 0 | -9.983468  | 0.816682  | -0.205661 |
| 280 | 7 | 0 | -12.111806 | -0.024028 | -0.069489 |
| 281 | 6 | 0 | -12.039515 | 4.301685  | -2.019734 |
| 282 | 6 | 0 | -11.957091 | 1.940370  | -2.823920 |
| 283 | 1 | 0 | -10.326572 | 2.980226  | -1.858933 |
| 284 | 6 | 0 | -10.931061 | 10.680460 | 5.316600  |
| 285 | 8 | 0 | -12.974560 | 9.765186  | 4.428573  |
| 286 | 1 | 0 | -12.085235 | 8.548451  | -1.168566 |
| 287 | 1 | 0 | -11.714057 | 7.108489  | -0.134404 |
| 288 | 1 | 0 | -13.259498 | 8.028109  | 0.112063  |
| 289 | 1 | 0 | -12.005559 | 10.780663 | -0.315863 |
| 290 | 1 | 0 | -13.098597 | 10.464639 | 1.096429  |
| 291 | 1 | 0 | -11.442149 | 11.154955 | 1.362085  |
| 292 | 1 | 0 | -13.112928 | 0.197362  | -0.067180 |
| 293 | 6 | 0 | -11.690338 | -1.407490 | 0.197937  |
| 294 | 6 | 0 | -11.410463 | 4.990071  | -3.204767 |
| 295 | 1 | 0 | -13.147706 | 4.208440  | -2.177967 |
| 296 | 1 | 0 | -11.890119 | 4.947038  | -1.113546 |
| 297 | 1 | 0 | -11.795774 | 2.353676  | -3.848802 |
| 298 | 1 | 0 | -11.412269 | 0.966766  | -2.750927 |
| 299 | 1 | 0 | -13.049418 | 1.748334  | -2.686440 |



|     |   |   |            |           |           |
|-----|---|---|------------|-----------|-----------|
| 300 | 1 | 0 | -11.364755 | 11.683020 | 5.391011  |
| 301 | 1 | 0 | -11.031408 | 10.204644 | 6.298381  |
| 302 | 1 | 0 | -9.874363  | 10.748750 | 5.046229  |
| 303 | 6 | 0 | -12.298635 | -2.334848 | -0.884363 |
| 304 | 6 | 0 | -12.129680 | -1.933082 | 1.564050  |
| 305 | 1 | 0 | -10.597166 | -1.426437 | 0.143397  |
| 306 | 1 | 0 | -11.804648 | 6.031604  | -3.294027 |
| 307 | 1 | 0 | -10.300240 | 5.042136  | -3.087859 |
| 308 | 1 | 0 | -11.637560 | 4.448884  | -4.154703 |
| 309 | 8 | 0 | -13.524614 | -2.387062 | -1.054186 |
| 310 | 7 | 0 | -11.399463 | -3.064381 | -1.584464 |
| 311 | 6 | 0 | -11.596912 | -3.338646 | 1.768477  |
| 312 | 6 | 0 | -11.646333 | -1.033984 | 2.683243  |
| 313 | 1 | 0 | -13.258365 | -1.968665 | 1.588759  |
| 314 | 1 | 0 | -10.403476 | -2.959813 | -1.372120 |
| 315 | 6 | 0 | -11.795005 | -4.116729 | -2.532647 |
| 316 | 1 | 0 | -11.841663 | -3.691773 | 2.799516  |
| 317 | 1 | 0 | -12.056817 | -4.047112 | 1.037649  |
| 318 | 1 | 0 | -10.487059 | -3.362594 | 1.637956  |
| 319 | 1 | 0 | -11.869988 | -1.501877 | 3.672712  |
| 320 | 1 | 0 | -10.543440 | -0.872077 | 2.607522  |
| 321 | 1 | 0 | -12.156109 | -0.041078 | 2.647009  |
| 322 | 6 | 0 | -11.327455 | -5.466138 | -1.930343 |
| 323 | 6 | 0 | -11.156854 | -3.995555 | -3.905316 |
| 324 | 1 | 0 | -12.886533 | -4.088436 | -2.623155 |
| 325 | 8 | 0 | -10.125611 | -5.647860 | -1.674184 |
| 326 | 7 | 0 | -12.296198 | -6.383004 | -1.703816 |
| 327 | 6 | 0 | -11.687933 | -2.861170 | -4.705960 |
| 328 | 1 | 0 | -10.039637 | -3.893876 | -3.800132 |
| 329 | 1 | 0 | -11.348897 | -4.961183 | -4.450250 |
| 330 | 1 | 0 | -13.275257 | -6.135235 | -1.873865 |
| 331 | 6 | 0 | -11.977450 | -7.636499 | -1.007555 |
| 332 | 6 | 0 | -11.178586 | -1.567571 | -4.528355 |
| 333 | 6 | 0 | -12.673813 | -3.083085 | -5.673523 |
| 334 | 6 | 0 | -12.477436 | -8.859298 | -1.806301 |
| 335 | 6 | 0 | -12.481819 | -7.706109 | 0.419913  |
| 336 | 1 | 0 | -10.883305 | -7.680440 | -0.958465 |
| 337 | 6 | 0 | -11.631932 | -0.510519 | -5.308933 |
| 338 | 1 | 0 | -10.410869 | -1.385026 | -3.758992 |
| 339 | 6 | 0 | -13.136417 | -2.039093 | -6.470604 |
| 340 | 1 | 0 | -13.089675 | -4.093152 | -5.810688 |
| 341 | 8 | 0 | -13.629694 | -8.935403 | -2.261329 |
| 342 | 7 | 0 | -11.559165 | -9.839590 | -1.942400 |

|     |   |   |            |            |           |
|-----|---|---|------------|------------|-----------|
| 343 | 6 | 0 | -13.970038 | -7.499929  | 0.597931  |
| 344 | 1 | 0 | -12.191433 | -8.708446  | 0.837719  |
| 345 | 1 | 0 | -11.931997 | -6.925882  | 1.018046  |
| 346 | 6 | 0 | -12.610961 | -0.752947  | -6.286638 |
| 347 | 1 | 0 | -11.243003 | 0.508496   | -5.168092 |
| 348 | 1 | 0 | -13.911236 | -2.218875  | -7.228791 |
| 349 | 1 | 0 | -10.607922 | -9.676097  | -1.608568 |
| 350 | 6 | 0 | -11.865220 | -11.086697 | -2.627199 |
| 351 | 6 | 0 | -14.325965 | -7.579670  | 2.068904  |
| 352 | 1 | 0 | -14.278517 | -6.501477  | 0.186694  |
| 353 | 1 | 0 | -14.534040 | -8.278603  | 0.017317  |
| 354 | 8 | 0 | -13.003180 | 0.326000   | -7.045828 |
| 355 | 1 | 0 | -11.080686 | -11.814413 | -2.402498 |
| 356 | 1 | 0 | -12.828339 | -11.480540 | -2.286852 |
| 357 | 1 | 0 | -11.918509 | -10.948471 | -3.715103 |
| 358 | 6 | 0 | -15.810648 | -7.293690  | 2.282145  |
| 359 | 1 | 0 | -14.074692 | -8.598491  | 2.465211  |
| 360 | 1 | 0 | -13.705993 | -6.839897  | 2.643307  |
| 361 | 1 | 0 | -13.755009 | 0.049695   | -7.590017 |
| 362 | 7 | 0 | -16.208399 | -7.340771  | 3.669389  |
| 363 | 1 | 0 | -16.050526 | -6.297732  | 1.797055  |
| 364 | 1 | 0 | -16.409799 | -8.081428  | 1.739874  |
| 365 | 1 | 0 | -15.621877 | -6.759202  | 4.233631  |
| 366 | 1 | 0 | -17.158456 | -7.043733  | 3.768345  |
| 367 | 1 | 0 | -4.670327  | 2.791034   | 6.011605  |
| 368 | 7 | 0 | -5.638547  | 2.617336   | 6.288032  |
| 369 | 6 | 0 | -6.668609  | 2.706836   | 5.415319  |
| 370 | 1 | 0 | -5.859810  | 2.416338   | 7.254211  |
| 371 | 6 | 0 | -6.301239  | 3.066252   | 3.980252  |
| 372 | 8 | 0 | -7.847826  | 2.516616   | 5.751384  |
| 373 | 6 | 0 | -6.861082  | 4.452246   | 3.604059  |
| 374 | 1 | 0 | -6.746952  | 2.296550   | 3.337857  |
| 375 | 1 | 0 | -5.215090  | 3.040435   | 3.843510  |
| 376 | 6 | 0 | -6.571850  | 4.842588   | 2.141280  |
| 377 | 1 | 0 | -6.412845  | 5.218600   | 4.248094  |
| 378 | 1 | 0 | -7.942518  | 4.468614   | 3.775318  |
| 379 | 7 | 0 | -7.042607  | 6.200342   | 1.875775  |
| 380 | 6 | 0 | -7.284879  | 3.882966   | 1.169196  |
| 381 | 1 | 0 | -5.496787  | 4.828128   | 1.952004  |
| 382 | 1 | 0 | -8.044903  | 6.392615   | 1.977306  |
| 383 | 6 | 0 | -6.208306  | 7.205734   | 1.533977  |
| 384 | 8 | 0 | -8.520347  | 3.777748   | 1.188639  |
| 385 | 7 | 0 | -6.475940  | 3.191615   | 0.335064  |

|     |   |   |           |           |           |
|-----|---|---|-----------|-----------|-----------|
| 386 | 6 | 0 | -6.877124 | 8.587556  | 1.333601  |
| 387 | 8 | 0 | -4.979935 | 7.078487  | 1.401488  |
| 388 | 1 | 0 | -5.464744 | 3.342343  | 0.384607  |
| 389 | 6 | 0 | -6.998715 | 2.251507  | -0.670686 |
| 390 | 7 | 0 | -6.251231 | 9.524409  | 2.277855  |
| 391 | 6 | 0 | -6.731109 | 8.988318  | -0.132190 |
| 392 | 1 | 0 | -7.941492 | 8.536643  | 1.588744  |
| 393 | 6 | 0 | -6.408900 | 0.858392  | -0.334037 |
| 394 | 6 | 0 | -6.629619 | 2.606751  | -2.108981 |
| 395 | 1 | 0 | -8.088987 | 2.239119  | -0.568708 |
| 396 | 6 | 0 | -6.964105 | 10.186974 | 3.223674  |
| 397 | 1 | 0 | -5.246793 | 9.698495  | 2.197916  |
| 398 | 6 | 0 | -7.429462 | 7.969022  | -1.011906 |
| 399 | 6 | 0 | -7.308685 | 10.365706 | -0.385300 |
| 400 | 1 | 0 | -5.632921 | 8.999431  | -0.394916 |
| 401 | 8 | 0 | -5.178298 | 0.694306  | -0.299343 |
| 402 | 7 | 0 | -7.312027 | -0.109674 | -0.062819 |
| 403 | 6 | 0 | -7.197334 | 3.963270  | -2.506425 |
| 404 | 6 | 0 | -7.149809 | 1.523908  | -3.035431 |
| 405 | 1 | 0 | -5.504411 | 2.643957  | -2.193084 |
| 406 | 6 | 0 | -6.149804 | 11.102068 | 4.126069  |
| 407 | 8 | 0 | -8.191383 | 10.066924 | 3.375141  |
| 408 | 1 | 0 | -7.371447 | 8.285028  | -2.081286 |
| 409 | 1 | 0 | -6.946442 | 6.966212  | -0.914861 |
| 410 | 1 | 0 | -8.505796 | 7.875752  | -0.726006 |
| 411 | 1 | 0 | -7.289924 | 10.591712 | -1.479117 |
| 412 | 1 | 0 | -8.367023 | 10.416778 | -0.030573 |
| 413 | 1 | 0 | -6.717135 | 11.150629 | 0.143374  |
| 414 | 1 | 0 | -8.311282 | 0.118066  | -0.088002 |
| 415 | 6 | 0 | -6.902310 | -1.455902 | 0.364517  |
| 416 | 6 | 0 | -6.574433 | 4.493087  | -3.773404 |
| 417 | 1 | 0 | -8.309196 | 3.873385  | -2.638410 |
| 418 | 1 | 0 | -7.022635 | 4.709574  | -1.686383 |
| 419 | 1 | 0 | -6.968891 | 1.807062  | -4.100454 |
| 420 | 1 | 0 | -6.629308 | 0.553738  | -2.840433 |
| 421 | 1 | 0 | -8.247685 | 1.374914  | -2.889183 |
| 422 | 1 | 0 | -6.587745 | 12.104916 | 4.087588  |
| 423 | 1 | 0 | -6.241736 | 10.742211 | 5.156691  |
| 424 | 1 | 0 | -5.095371 | 11.143801 | 3.841867  |
| 425 | 6 | 0 | -7.494676 | -2.497220 | -0.618759 |
| 426 | 6 | 0 | -7.370635 | -1.822696 | 1.772178  |
| 427 | 1 | 0 | -5.808241 | -1.484442 | 0.333618  |
| 428 | 1 | 0 | -6.949821 | 5.524875  | -3.979933 |

|     |   |   |           |            |           |
|-----|---|---|-----------|------------|-----------|
| 429 | 1 | 0 | -5.461674 | 4.535150   | -3.679056 |
| 430 | 1 | 0 | -6.827724 | 3.848632   | -4.649390 |
| 431 | 8 | 0 | -8.717152 | -2.559635  | -0.810892 |
| 432 | 7 | 0 | -6.586202 | -3.308676  | -1.206357 |
| 433 | 6 | 0 | -6.877631 | -3.210855  | 2.134060  |
| 434 | 6 | 0 | -6.876439 | -0.820540  | 2.795033  |
| 435 | 1 | 0 | -8.500100 | -1.827666  | 1.784735  |
| 436 | 1 | 0 | -5.593034 | -3.178343  | -0.994364 |
| 437 | 6 | 0 | -6.963472 | -4.467295  | -2.031298 |
| 438 | 1 | 0 | -7.137255 | -3.441753  | 3.195697  |
| 439 | 1 | 0 | -7.353801 | -3.983155  | 1.482298  |
| 440 | 1 | 0 | -5.768289 | -3.279082  | 2.016309  |
| 441 | 1 | 0 | -7.134525 | -1.167335  | 3.825127  |
| 442 | 1 | 0 | -5.767264 | -0.704974  | 2.726375  |
| 443 | 1 | 0 | -7.349632 | 0.178546   | 2.637405  |
| 444 | 6 | 0 | -6.516962 | -5.728052  | -1.248078 |
| 445 | 6 | 0 | -6.278675 | -4.519800  | -3.385299 |
| 446 | 1 | 0 | -8.051432 | -4.447535  | -2.157556 |
| 447 | 8 | 0 | -5.314456 | -5.896666  | -0.986049 |
| 448 | 7 | 0 | -7.499339 | -6.577277  | -0.866609 |
| 449 | 6 | 0 | -6.735935 | -3.465249  | -4.327676 |
| 450 | 1 | 0 | -5.162527 | -4.444034  | -3.249348 |
| 451 | 1 | 0 | -6.487944 | -5.533950  | -3.825597 |
| 452 | 1 | 0 | -8.474858 | -6.349191  | -1.078669 |
| 453 | 6 | 0 | -7.182049 | -7.725329  | -0.007131 |
| 454 | 6 | 0 | -6.199138 | -2.172221  | -4.259946 |
| 455 | 6 | 0 | -7.672872 | -3.767455  | -5.321730 |
| 456 | 6 | 0 | -7.741832 | -9.039098  | -0.594544 |
| 457 | 6 | 0 | -7.611155 | -7.575263  | 1.438333  |
| 458 | 1 | 0 | -6.087992 | -7.793483  | -0.000007 |
| 459 | 6 | 0 | -6.578319 | -1.195210  | -5.173091 |
| 460 | 1 | 0 | -5.467634 | -1.926049  | -3.473174 |
| 461 | 6 | 0 | -8.059756 | -2.805307  | -6.251173 |
| 462 | 1 | 0 | -8.109830 | -4.776532  | -5.374668 |
| 463 | 8 | 0 | -8.918966 | -9.162984  | -0.969456 |
| 464 | 7 | 0 | -6.838889 | -10.042318 | -0.641124 |
| 465 | 6 | 0 | -9.077319 | -7.281881  | 1.668117  |
| 466 | 1 | 0 | -7.332922 | -8.523013  | 1.975599  |
| 467 | 1 | 0 | -7.000641 | -6.745044  | 1.893709  |
| 468 | 6 | 0 | -7.508379 | -1.519165  | -6.174679 |
| 469 | 1 | 0 | -6.167776 | -0.176371  | -5.120163 |
| 470 | 1 | 0 | -8.796885 | -3.047691  | -7.029217 |
| 471 | 1 | 0 | -5.872930 | -9.851074  | -0.371254 |

|     |   |   |            |            |           |
|-----|---|---|------------|------------|-----------|
| 472 | 6 | 0 | -7.192494  | -11.369424 | -1.123005 |
| 473 | 6 | 0 | -9.350815  | -7.196524  | 3.156845  |
| 474 | 1 | 0 | -9.362758  | -6.315361  | 1.173559  |
| 475 | 1 | 0 | -9.706286  | -8.086317  | 1.199927  |
| 476 | 8 | 0 | -7.824138  | -0.520651  | -7.067835 |
| 477 | 1 | 0 | -6.361319  | -12.049799 | -0.919802 |
| 478 | 1 | 0 | -8.089416  | -11.738104 | -0.613419 |
| 479 | 1 | 0 | -7.391344  | -11.364938 | -2.202253 |
| 480 | 6 | 0 | -10.811586 | -6.843527  | 3.425542  |
| 481 | 1 | 0 | -9.102261  | -8.176125  | 3.643861  |
| 482 | 1 | 0 | -8.679559  | -6.420426  | 3.614427  |
| 483 | 1 | 0 | -8.567965  | -0.827471  | -7.606665 |
| 484 | 7 | 0 | -11.124027 | -6.746742  | 4.831340  |
| 485 | 1 | 0 | -11.052408 | -5.889511  | 2.861710  |
| 486 | 1 | 0 | -11.466580 | -7.656477  | 2.994331  |
| 487 | 1 | 0 | -10.525315 | -6.091236  | 5.291669  |
| 488 | 1 | 0 | -12.076979 | -6.470200  | 4.957250  |
| 489 | 1 | 0 | 5.070797   | 3.933072   | 5.197667  |
| 490 | 7 | 0 | 4.110704   | 3.815826   | 5.527009  |
| 491 | 6 | 0 | 3.059239   | 3.711321   | 4.682063  |
| 492 | 1 | 0 | 3.914273   | 3.828736   | 6.519117  |
| 493 | 6 | 0 | 3.388463   | 3.750738   | 3.194321  |
| 494 | 8 | 0 | 1.890027   | 3.594999   | 5.081159  |
| 495 | 6 | 0 | 2.777245   | 5.001097   | 2.532176  |
| 496 | 1 | 0 | 2.957799   | 2.844188   | 2.750626  |
| 497 | 1 | 0 | 4.472006   | 3.723964   | 3.038307  |
| 498 | 6 | 0 | 3.026997   | 5.056933   | 1.011894  |
| 499 | 1 | 0 | 3.214510   | 5.904247   | 2.975080  |
| 500 | 1 | 0 | 1.699745   | 5.028118   | 2.725590  |
| 501 | 7 | 0 | 2.532361   | 6.314136   | 0.456590  |
| 502 | 6 | 0 | 2.311293   | 3.894473   | 0.298292  |
| 503 | 1 | 0 | 4.098207   | 5.012353   | 0.806912  |
| 504 | 6 | 0 | 3.348230   | 7.215998   | -0.131590 |
| 505 | 1 | 0 | 1.529229   | 6.515497   | 0.524689  |
| 506 | 8 | 0 | 1.075126   | 3.800277   | 0.343851  |
| 507 | 7 | 0 | 3.117382   | 3.021468   | -0.344502 |
| 508 | 6 | 0 | 2.658978   | 8.507452   | -0.635927 |
| 509 | 8 | 0 | 4.574853   | 7.066066   | -0.258312 |
| 510 | 1 | 0 | 4.128868   | 3.179593   | -0.336003 |
| 511 | 6 | 0 | 2.592987   | 1.869651   | -1.097332 |
| 512 | 7 | 0 | 3.286492   | 9.645065   | 0.051447  |
| 513 | 6 | 0 | 2.776586   | 8.554946   | -2.157270 |
| 514 | 1 | 0 | 1.599633   | 8.508000   | -0.356184 |

|     |   |   |          |           |           |
|-----|---|---|----------|-----------|-----------|
| 515 | 6 | 0 | 3.185538 | 0.595585  | -0.443480 |
| 516 | 6 | 0 | 2.956906 | 1.875250  | -2.580293 |
| 517 | 1 | 0 | 1.502930 | 1.879726  | -0.993883 |
| 518 | 6 | 0 | 2.579071 | 10.505589 | 0.827060  |
| 519 | 1 | 0 | 4.286165 | 9.807406  | -0.089713 |
| 520 | 6 | 0 | 2.074836 | 7.353264  | -2.760727 |
| 521 | 6 | 0 | 2.180157 | 9.830851  | -2.715067 |
| 522 | 1 | 0 | 3.870147 | 8.511455  | -2.435490 |
| 523 | 8 | 0 | 4.416357 | 0.452714  | -0.360713 |
| 524 | 7 | 0 | 2.285102 | -0.291151 | 0.034759  |
| 525 | 6 | 0 | 2.378473 | 3.094848  | -3.286329 |
| 526 | 6 | 0 | 2.441377 | 0.599961  | -3.219974 |
| 527 | 1 | 0 | 4.081637 | 1.898003  | -2.675651 |
| 528 | 6 | 0 | 3.396009 | 11.613791 | 1.474845  |
| 529 | 8 | 0 | 1.355959 | 10.414192 | 1.024738  |
| 530 | 1 | 0 | 2.110576 | 7.410911  | -3.875259 |
| 531 | 1 | 0 | 2.571067 | 6.404442  | -2.441580 |
| 532 | 1 | 0 | 1.004801 | 7.321732  | -2.439814 |
| 533 | 1 | 0 | 2.177412 | 9.793943  | -3.831539 |
| 534 | 1 | 0 | 1.127706 | 9.957312  | -2.361695 |
| 535 | 1 | 0 | 2.772613 | 10.721541 | -2.396920 |
| 536 | 1 | 0 | 1.285209 | -0.082350 | -0.051388 |
| 537 | 6 | 0 | 2.697572 | -1.506144 | 0.752955  |
| 538 | 6 | 0 | 3.005420 | 3.322465  | -4.638678 |
| 539 | 1 | 0 | 1.268868 | 2.962459  | -3.400218 |
| 540 | 1 | 0 | 2.537599 | 4.014133  | -2.662227 |
| 541 | 1 | 0 | 2.601098 | 0.629036  | -4.324883 |
| 542 | 1 | 0 | 2.981988 | -0.291031 | -2.814564 |
| 543 | 1 | 0 | 1.348524 | 0.474427  | -3.022265 |
| 544 | 1 | 0 | 2.938632 | 12.575416 | 1.220286  |
| 545 | 1 | 0 | 3.334337 | 11.497832 | 2.562500  |
| 546 | 1 | 0 | 4.443135 | 11.603305 | 1.161893  |
| 547 | 6 | 0 | 2.122660 | -2.742106 | 0.015277  |
| 548 | 6 | 0 | 2.215384 | -1.556813 | 2.202054  |
| 549 | 1 | 0 | 3.792097 | -1.531767 | 0.740572  |
| 550 | 1 | 0 | 2.606364 | 4.263436  | -5.089820 |
| 551 | 1 | 0 | 4.115208 | 3.417827  | -4.548906 |
| 552 | 1 | 0 | 2.781389 | 2.479645  | -5.336026 |
| 553 | 8 | 0 | 0.903332 | -2.852615 | -0.175611 |
| 554 | 7 | 0 | 3.042839 | -3.655613 | -0.368198 |
| 555 | 6 | 0 | 2.684225 | -2.842290 | 2.856978  |
| 556 | 6 | 0 | 2.720604 | -0.365710 | 2.990011  |
| 557 | 1 | 0 | 1.086030 | -1.543073 | 2.205961  |

|     |   |   |           |            |           |
|-----|---|---|-----------|------------|-----------|
| 558 | 1 | 0 | 4.031489  | -3.475998  | -0.170922 |
| 559 | 6 | 0 | 2.686218  | -4.969663  | -0.927976 |
| 560 | 1 | 0 | 2.424672  | -2.833100  | 3.943437  |
| 561 | 1 | 0 | 2.190871  | -3.728580  | 2.388411  |
| 562 | 1 | 0 | 3.791582  | -2.955578  | 2.756848  |
| 563 | 1 | 0 | 2.436131  | -0.470870  | 4.065162  |
| 564 | 1 | 0 | 3.833622  | -0.294959  | 2.922252  |
| 565 | 1 | 0 | 2.279353  | 0.585478   | 2.606114  |
| 566 | 6 | 0 | 3.120834  | -6.022941  | 0.123131  |
| 567 | 1 | 0 | 1.601605  | -4.985851  | -1.081207 |
| 568 | 8 | 0 | 4.322637  | -6.129505  | 0.419371  |
| 569 | 7 | 0 | 2.136468  | -6.760928  | 0.686253  |
| 570 | 6 | 0 | 3.022115  | -4.470626  | -3.377078 |
| 571 | 1 | 0 | 1.160354  | -6.585678  | 0.430330  |
| 572 | 6 | 0 | 2.456344  | -7.679763  | 1.786970  |
| 573 | 6 | 0 | 3.591981  | -3.202004  | -3.551238 |
| 574 | 6 | 0 | 1.854350  | -9.081664  | 1.546580  |
| 575 | 6 | 0 | 2.079655  | -7.177886  | 3.166249  |
| 576 | 1 | 0 | 3.548481  | -7.773282  | 1.782186  |
| 577 | 6 | 0 | 3.285592  | -2.430944  | -4.666531 |
| 578 | 1 | 0 | 4.292542  | -2.810037  | -2.795995 |
| 579 | 8 | 0 | 0.665850  | -9.267556  | 1.238952  |
| 580 | 7 | 0 | 2.740949  | -10.085657 | 1.726137  |
| 581 | 6 | 0 | 0.629974  | -6.791874  | 3.358620  |
| 582 | 1 | 0 | 2.352174  | -7.979883  | 3.905817  |
| 583 | 1 | 0 | 2.725215  | -6.283265  | 3.395582  |
| 584 | 6 | 0 | 2.395745  | -2.940086  | -5.626670 |
| 585 | 1 | 0 | 3.721911  | -1.431112  | -4.804512 |
| 586 | 1 | 0 | 3.714934  | -9.853347  | 1.923446  |
| 587 | 6 | 0 | 2.355702  | -11.482716 | 1.589802  |
| 588 | 6 | 0 | 0.413367  | -6.326914  | 4.785192  |
| 589 | 1 | 0 | 0.347604  | -5.971527  | 2.646181  |
| 590 | 1 | 0 | -0.031858 | -7.669390  | 3.126622  |
| 591 | 8 | 0 | 2.153873  | -2.145257  | -6.724023 |
| 592 | 1 | 0 | 3.186845  | -12.110423 | 1.921697  |
| 593 | 1 | 0 | 1.475115  | -11.701880 | 2.203653  |
| 594 | 1 | 0 | 2.116032  | -11.732528 | 0.548547  |
| 595 | 6 | 0 | -1.039556 | -5.918486  | 5.012860  |
| 596 | 1 | 0 | 0.691523  | -7.148042  | 5.497424  |
| 597 | 1 | 0 | 1.092504  | -5.457995  | 5.000025  |
| 598 | 1 | 0 | 1.424617  | -2.540960  | -7.223473 |
| 599 | 7 | 0 | -1.299455 | -5.472001  | 6.360380  |
| 600 | 1 | 0 | -1.311031 | -5.136137  | 4.237860  |

|     |   |   |           |           |           |
|-----|---|---|-----------|-----------|-----------|
| 601 | 1 | 0 | -1.700648 | -6.814665 | 4.823087  |
| 602 | 1 | 0 | -0.715406 | -4.698100 | 6.604936  |
| 603 | 1 | 0 | -2.259179 | -5.208576 | 6.460349  |
| 604 | 6 | 0 | 1.811164  | -4.203274 | -5.462814 |
| 605 | 1 | 0 | 1.105084  | -4.589332 | -6.211091 |
| 606 | 6 | 0 | 2.125578  | -4.956860 | -4.334892 |
| 607 | 1 | 0 | 1.662929  | -5.946707 | -4.200186 |
| 608 | 6 | 0 | 3.409206  | -5.315551 | -2.217598 |
| 609 | 1 | 0 | 3.183401  | -6.394103 | -2.445512 |
| 610 | 1 | 0 | 4.521880  | -5.238726 | -2.055622 |
| 611 | 1 | 0 | 0.194758  | 3.366186  | 5.647279  |
| 612 | 7 | 0 | -0.771495 | 3.218403  | 5.945220  |
| 613 | 6 | 0 | -1.808546 | 3.220333  | 5.076499  |
| 614 | 1 | 0 | -0.985771 | 3.121768  | 6.928955  |
| 615 | 6 | 0 | -1.453615 | 3.426509  | 3.608353  |
| 616 | 8 | 0 | -2.985308 | 3.069092  | 5.440283  |
| 617 | 6 | 0 | -2.045373 | 4.749385  | 3.084312  |
| 618 | 1 | 0 | -1.883118 | 2.580113  | 3.057769  |
| 619 | 1 | 0 | -0.367677 | 3.408144  | 3.469062  |
| 620 | 6 | 0 | -1.770923 | 4.979754  | 1.584586  |
| 621 | 1 | 0 | -1.610437 | 5.591501  | 3.636278  |
| 622 | 1 | 0 | -3.125995 | 4.763038  | 3.260731  |
| 623 | 7 | 0 | -2.253859 | 6.296410  | 1.174277  |
| 624 | 6 | 0 | -2.482523 | 3.912089  | 0.730829  |
| 625 | 1 | 0 | -0.697086 | 4.953916  | 1.389808  |
| 626 | 6 | 0 | -1.428242 | 7.258508  | 0.708096  |
| 627 | 1 | 0 | -3.255801 | 6.495382  | 1.264976  |
| 628 | 8 | 0 | -3.718483 | 3.811255  | 0.760549  |
| 629 | 7 | 0 | -1.673575 | 3.125431  | -0.013444 |
| 630 | 6 | 0 | -2.105354 | 8.607084  | 0.361037  |
| 631 | 8 | 0 | -0.201219 | 7.119159  | 0.574795  |
| 632 | 1 | 0 | -0.662218 | 3.280762  | 0.019961  |
| 633 | 6 | 0 | -2.195902 | 2.073216  | -0.901813 |
| 634 | 7 | 0 | -1.478577 | 9.645561  | 1.191732  |
| 635 | 6 | 0 | -1.970598 | 8.843906  | -1.140927 |
| 636 | 1 | 0 | -3.167706 | 8.580058  | 0.628010  |
| 637 | 6 | 0 | -1.607753 | 0.728728  | -0.403274 |
| 638 | 6 | 0 | -1.824815 | 2.255536  | -2.371637 |
| 639 | 1 | 0 | -3.286389 | 2.073633  | -0.802231 |
| 640 | 6 | 0 | -2.188076 | 10.401773 | 2.067491  |
| 641 | 1 | 0 | -0.476764 | 9.818244  | 1.081440  |
| 642 | 6 | 0 | -2.668512 | 7.730131  | -1.897923 |
| 643 | 6 | 0 | -2.557358 | 10.181978 | -1.541038 |



|     |   |   |           |           |           |
|-----|---|---|-----------|-----------|-----------|
| 644 | 1 | 0 | -0.874071 | 8.831040  | -1.410518 |
| 645 | 8 | 0 | -0.377138 | 0.572072  | -0.342793 |
| 646 | 7 | 0 | -2.510670 | -0.204482 | -0.028866 |
| 647 | 6 | 0 | -2.390986 | 3.555811  | -2.927656 |
| 648 | 6 | 0 | -2.345330 | 1.070864  | -3.163561 |
| 649 | 1 | 0 | -0.699549 | 2.281567  | -2.458199 |
| 650 | 6 | 0 | -1.370940 | 11.410834 | 2.860549  |
| 651 | 8 | 0 | -3.413264 | 10.292542 | 2.241884  |
| 652 | 1 | 0 | -2.615642 | 7.924576  | -2.996193 |
| 653 | 1 | 0 | -2.181451 | 6.746064  | -1.691099 |
| 654 | 1 | 0 | -3.743428 | 7.666113  | -1.599085 |
| 655 | 1 | 0 | -2.546255 | 10.285662 | -2.653242 |
| 656 | 1 | 0 | -3.613880 | 10.266786 | -1.187381 |
| 657 | 1 | 0 | -1.967114 | 11.023459 | -1.106233 |
| 658 | 1 | 0 | -3.510165 | 0.016249  | -0.086691 |
| 659 | 6 | 0 | -2.100237 | -1.492935 | 0.549607  |
| 660 | 6 | 0 | -1.763470 | 3.933684  | -4.245735 |
| 661 | 1 | 0 | -3.502259 | 3.450078  | -3.052681 |
| 662 | 1 | 0 | -2.219911 | 4.393440  | -2.200316 |
| 663 | 1 | 0 | -2.168097 | 1.227322  | -4.255021 |
| 664 | 1 | 0 | -1.822041 | 0.131086  | -2.858219 |
| 665 | 1 | 0 | -3.442476 | 0.938014  | -2.997296 |
| 666 | 1 | 0 | -1.824414 | 12.399428 | 2.734963  |
| 667 | 1 | 0 | -1.437500 | 11.150628 | 3.922707  |
| 668 | 1 | 0 | -0.322489 | 11.438099 | 2.553154  |
| 669 | 6 | 0 | -2.686805 | -2.640706 | -0.311387 |
| 670 | 6 | 0 | -2.572797 | -1.698577 | 1.988303  |
| 671 | 1 | 0 | -1.005982 | -1.521915 | 0.525565  |
| 672 | 1 | 0 | -2.143311 | 4.930937  | -4.576434 |
| 673 | 1 | 0 | -0.651550 | 3.993662  | -4.151328 |
| 674 | 1 | 0 | -2.007999 | 3.187321  | -5.039454 |
| 675 | 8 | 0 | -3.908768 | -2.728502 | -0.497374 |
| 676 | 7 | 0 | -1.773959 | -3.509414 | -0.801684 |
| 677 | 6 | 0 | -2.079187 | -3.035578 | 2.507642  |
| 678 | 6 | 0 | -2.083751 | -0.585764 | 2.892416  |
| 679 | 1 | 0 | -3.702254 | -1.704329 | 1.997434  |
| 680 | 1 | 0 | -0.781560 | -3.349823 | -0.606591 |
| 681 | 6 | 0 | -2.141092 | -4.754891 | -1.494665 |
| 682 | 1 | 0 | -2.348430 | -3.147266 | 3.586039  |
| 683 | 1 | 0 | -2.546696 | -3.878210 | 1.942393  |
| 684 | 1 | 0 | -0.968551 | -3.112117 | 2.408766  |
| 685 | 1 | 0 | -2.345606 | -0.813575 | 3.954253  |
| 686 | 1 | 0 | -0.974404 | -0.477265 | 2.815405  |

|     |   |   |           |            |           |
|-----|---|---|-----------|------------|-----------|
| 687 | 1 | 0 | -2.556908 | 0.388433   | 2.620448  |
| 688 | 6 | 0 | -1.700040 | -5.917142  | -0.568220 |
| 689 | 1 | 0 | -3.227497 | -4.752451  | -1.635541 |
| 690 | 8 | 0 | -0.497446 | -6.057203  | -0.289677 |
| 691 | 7 | 0 | -2.683801 | -6.712489  | -0.087285 |
| 692 | 6 | 0 | -1.852153 | -4.002807  | -3.881413 |
| 693 | 1 | 0 | -3.659709 | -6.509531  | -0.322048 |
| 694 | 6 | 0 | -2.364493 | -7.747926  | 0.904128  |
| 695 | 6 | 0 | -1.290841 | -2.719620  | -3.936675 |
| 696 | 6 | 0 | -2.955435 | -9.117088  | 0.502777  |
| 697 | 6 | 0 | -2.755364 | -7.408270  | 2.328339  |
| 698 | 1 | 0 | -1.271663 | -7.833104  | 0.896904  |
| 699 | 6 | 0 | -1.628087 | -1.838492  | -4.957496 |
| 700 | 1 | 0 | -0.572873 | -2.404582  | -3.162021 |
| 701 | 8 | 0 | -4.139107 | -9.269947  | 0.160510  |
| 702 | 7 | 0 | -2.067347 | -10.132249 | 0.585826  |
| 703 | 6 | 0 | -4.211089 | -7.064033  | 2.552822  |
| 704 | 1 | 0 | -2.476493 | -8.284596  | 2.975400  |
| 705 | 1 | 0 | -2.122710 | -6.537068  | 2.660518  |
| 706 | 6 | 0 | -2.539978 | -2.250552  | -5.943280 |
| 707 | 1 | 0 | -1.198055 | -0.827403  | -5.002336 |
| 708 | 1 | 0 | -1.095040 | -9.918341  | 0.811793  |
| 709 | 6 | 0 | -2.442164 | -11.508639 | 0.297448  |
| 710 | 6 | 0 | -4.443078 | -6.773280  | 4.022531  |
| 711 | 1 | 0 | -4.498538 | -6.168982  | 1.939266  |
| 712 | 1 | 0 | -4.861156 | -7.915161  | 2.213907  |
| 713 | 8 | 0 | -2.813106 | -1.347397  | -6.945406 |
| 714 | 1 | 0 | -1.666297 | -12.174892 | 0.684365  |
| 715 | 1 | 0 | -3.395018 | -11.750358 | 0.779259  |
| 716 | 1 | 0 | -2.551080 | -11.681094 | -0.781286 |
| 717 | 6 | 0 | -5.899643 | -6.398382  | 4.283035  |
| 718 | 1 | 0 | -4.168660 | -7.672975  | 4.634140  |
| 719 | 1 | 0 | -3.769040 | -5.934827  | 4.346567  |
| 720 | 1 | 0 | -3.555506 | -1.692319  | -7.462770 |
| 721 | 7 | 0 | -6.174943 | -6.118238  | 5.671786  |
| 722 | 1 | 0 | -6.165984 | -5.529007  | 3.605190  |
| 723 | 1 | 0 | -6.556221 | -7.266474  | 3.980713  |
| 724 | 1 | 0 | -5.584051 | -5.390073  | 6.018984  |
| 725 | 1 | 0 | -7.132246 | -5.853405  | 5.789686  |
| 726 | 6 | 0 | -3.115070 | -3.527772  | -5.898107 |
| 727 | 1 | 0 | -3.838115 | -3.838269  | -6.665087 |
| 728 | 6 | 0 | -2.770283 | -4.392500  | -4.862488 |
| 729 | 1 | 0 | -3.226054 | -5.393709  | -4.820082 |

|     |   |   |           |           |           |
|-----|---|---|-----------|-----------|-----------|
| 730 | 6 | 0 | -1.436328 | -4.960262 | -2.823654 |
| 731 | 1 | 0 | -1.658587 | -6.011202 | -3.158769 |
| 732 | 1 | 0 | -0.321451 | -4.891199 | -2.673693 |
| 733 | 1 | 0 | 9.950761  | 4.448214  | 4.606483  |
| 734 | 7 | 0 | 8.998225  | 4.374398  | 4.967519  |
| 735 | 6 | 0 | 7.929349  | 4.168205  | 4.163450  |
| 736 | 1 | 0 | 8.822461  | 4.509969  | 5.954298  |
| 737 | 6 | 0 | 8.228037  | 4.023862  | 2.675616  |
| 738 | 8 | 0 | 6.768980  | 4.103413  | 4.597925  |
| 739 | 6 | 0 | 7.605886  | 5.186767  | 1.878398  |
| 740 | 1 | 0 | 7.785560  | 3.072011  | 2.356148  |
| 741 | 1 | 0 | 9.308170  | 3.972502  | 2.501907  |
| 742 | 6 | 0 | 7.823604  | 5.058274  | 0.357619  |
| 743 | 1 | 0 | 8.053385  | 6.135032  | 2.200122  |
| 744 | 1 | 0 | 6.532549  | 5.241365  | 2.088265  |
| 745 | 7 | 0 | 7.309920  | 6.238435  | -0.333751 |
| 746 | 6 | 0 | 7.099409  | 3.816460  | -0.195319 |
| 747 | 1 | 0 | 8.890439  | 4.992372  | 0.136182  |
| 748 | 6 | 0 | 8.109333  | 7.069778  | -1.036816 |
| 749 | 1 | 0 | 6.307794  | 6.445179  | -0.267583 |
| 750 | 8 | 0 | 5.865789  | 3.722928  | -0.103283 |
| 751 | 7 | 0 | 7.894013  | 2.879110  | -0.756747 |
| 752 | 6 | 0 | 7.403516  | 8.291080  | -1.674611 |
| 753 | 8 | 0 | 9.334723  | 6.910801  | -1.166533 |
| 754 | 1 | 0 | 8.904262  | 3.039832  | -0.792721 |
| 755 | 6 | 0 | 7.359609  | 1.640538  | -1.347142 |
| 756 | 7 | 0 | 8.034901  | 9.501828  | -1.130784 |
| 757 | 6 | 0 | 7.498453  | 8.165392  | -3.193150 |
| 758 | 1 | 0 | 6.348330  | 8.318334  | -1.380677 |
| 759 | 6 | 0 | 7.974216  | 0.462456  | -0.547686 |
| 760 | 6 | 0 | 7.688679  | 1.456338  | -2.826975 |
| 761 | 1 | 0 | 6.272375  | 1.660870  | -1.218985 |
| 762 | 6 | 0 | 7.333081  | 10.450594 | -0.460323 |
| 763 | 1 | 0 | 9.032564  | 9.646670  | -1.301792 |
| 764 | 6 | 0 | 6.879821  | 9.363692  | -3.883144 |
| 765 | 1 | 0 | 8.588284  | 8.100721  | -3.481830 |
| 766 | 8 | 0 | 9.206864  | 0.323977  | -0.487748 |
| 767 | 7 | 0 | 7.088381  | -0.342840 | 0.079515  |
| 768 | 6 | 0 | 7.171547  | 2.620998  | -3.661042 |
| 769 | 6 | 0 | 7.081108  | 0.151413  | -3.305554 |
| 770 | 1 | 0 | 8.810267  | 1.398039  | -2.941373 |
| 771 | 6 | 0 | 8.154291  | 11.629767 | 0.040232  |
| 772 | 8 | 0 | 6.111788  | 10.385051 | -0.243466 |

|     |   |   |          |           |           |
|-----|---|---|----------|-----------|-----------|
| 773 | 1 | 0 | 6.862600 | 9.200402  | -4.988089 |
| 774 | 1 | 0 | 5.830787 | 9.518956  | -3.531031 |
| 775 | 1 | 0 | 7.466039 | 10.290618 | -3.676492 |
| 776 | 1 | 0 | 6.086242 | -0.147509 | -0.010913 |
| 777 | 6 | 0 | 7.518010 | -1.453282 | 0.942724  |
| 778 | 6 | 0 | 7.680600 | 2.580229  | -5.079884 |
| 779 | 1 | 0 | 6.048492 | 2.603844  | -3.660760 |
| 780 | 1 | 0 | 7.487910 | 3.594232  | -3.199920 |
| 781 | 1 | 0 | 7.313118 | -0.015066 | -4.386085 |
| 782 | 1 | 0 | 7.499432 | -0.712638 | -2.732063 |
| 783 | 1 | 0 | 5.971255 | 0.163429  | -3.175078 |
| 784 | 1 | 0 | 7.705077 | 12.551982 | -0.342710 |
| 785 | 1 | 0 | 8.085785 | 11.659786 | 1.133125  |
| 786 | 1 | 0 | 9.202705 | 11.572325 | -0.263112 |
| 787 | 6 | 0 | 6.933010 | -2.776225 | 0.384383  |
| 788 | 6 | 0 | 7.062080 | -1.312192 | 2.393980  |
| 789 | 1 | 0 | 8.612413 | -1.479036 | 0.910805  |
| 790 | 1 | 0 | 7.371711 | 3.507102  | -5.621846 |
| 791 | 1 | 0 | 8.796017 | 2.516206  | -5.098280 |
| 792 | 1 | 0 | 7.269618 | 1.700999  | -5.632109 |
| 793 | 8 | 0 | 5.709184 | -2.916632 | 0.246431  |
| 794 | 7 | 0 | 7.849876 | -3.725256 | 0.094145  |
| 795 | 6 | 0 | 7.565552 | -2.486105 | 3.211901  |
| 796 | 6 | 0 | 7.556109 | -0.015459 | 3.001807  |
| 797 | 1 | 0 | 5.932818 | -1.317503 | 2.416602  |
| 798 | 1 | 0 | 8.844517 | -3.508282 | 0.200038  |
| 799 | 6 | 0 | 7.494047 | -5.088697 | -0.329452 |
| 800 | 1 | 0 | 7.293022 | -2.344258 | 4.285971  |
| 801 | 1 | 0 | 7.107797 | -3.442082 | 2.858946  |
| 802 | 1 | 0 | 8.677024 | -2.573164 | 3.136245  |
| 803 | 1 | 0 | 7.306557 | 0.015548  | 4.090254  |
| 804 | 1 | 0 | 8.664095 | 0.073210  | 2.888682  |
| 805 | 1 | 0 | 7.076108 | 0.865239  | 2.511065  |
| 806 | 6 | 0 | 7.933558 | -6.031159 | 0.820412  |
| 807 | 1 | 0 | 6.409121 | -5.122185 | -0.476680 |
| 808 | 8 | 0 | 9.136560 | -6.104388 | 1.122360  |
| 809 | 7 | 0 | 6.952264 | -6.708844 | 1.458863  |
| 810 | 6 | 0 | 7.988380 | -4.693092 | -2.769360 |
| 811 | 1 | 0 | 5.975412 | -6.563918 | 1.187282  |
| 812 | 6 | 0 | 7.275795 | -7.506371 | 2.649359  |
| 813 | 6 | 0 | 8.742137 | -3.523145 | -2.940992 |
| 814 | 6 | 0 | 6.673223 | -8.926217 | 2.564416  |
| 815 | 6 | 0 | 6.904457 | -6.859999 | 3.968824  |

|     |   |   |           |            |           |
|-----|---|---|-----------|------------|-----------|
| 816 | 1 | 0 | 8.367887  | -7.599971  | 2.651340  |
| 817 | 6 | 0 | 8.571393  | -2.726360  | -4.066881 |
| 818 | 1 | 0 | 9.478958  | -3.230239  | -2.173494 |
| 819 | 8 | 0 | 5.486108  | -9.146669  | 2.275061  |
| 820 | 7 | 0 | 7.559655  | -9.902360  | 2.862431  |
| 821 | 6 | 0 | 5.453172  | -6.465695  | 4.128860  |
| 822 | 1 | 0 | 7.188525  | -7.574384  | 4.789339  |
| 823 | 1 | 0 | 7.544409  | -5.941122  | 4.094297  |
| 824 | 6 | 0 | 7.632448  | -3.109395  | -5.039283 |
| 825 | 1 | 0 | 9.154162  | -1.803717  | -4.204796 |
| 826 | 1 | 0 | 8.532702  | -9.646018  | 3.031690  |
| 827 | 6 | 0 | 7.177121  | -11.306438 | 2.890184  |
| 828 | 6 | 0 | 5.242763  | -5.847563  | 5.496974  |
| 829 | 1 | 0 | 5.158836  | -5.731696  | 3.332127  |
| 830 | 1 | 0 | 4.797075  | -7.368469  | 4.000662  |
| 831 | 8 | 0 | 7.512108  | -2.284933  | -6.135539 |
| 832 | 1 | 0 | 7.984402  | -11.882673 | 3.350092  |
| 833 | 1 | 0 | 6.262284  | -11.441931 | 3.476782  |
| 834 | 1 | 0 | 6.995339  | -11.694845 | 1.879888  |
| 835 | 6 | 0 | 3.787934  | -5.428350  | 5.689887  |
| 836 | 1 | 0 | 5.533849  | -6.582625  | 6.293109  |
| 837 | 1 | 0 | 5.914803  | -4.954242  | 5.609084  |
| 838 | 1 | 0 | 6.771070  | -2.606576  | -6.669644 |
| 839 | 7 | 0 | 3.530500  | -4.852685  | 6.987872  |
| 840 | 1 | 0 | 3.508093  | -4.728258  | 4.842538  |
| 841 | 1 | 0 | 3.132390  | -6.343188  | 5.592242  |
| 842 | 1 | 0 | 4.105056  | -4.050485  | 7.149372  |
| 843 | 1 | 0 | 2.567686  | -4.594200  | 7.069168  |
| 844 | 6 | 0 | 6.874765  | -4.277711  | -4.883757 |
| 845 | 1 | 0 | 6.137408  | -4.567385  | -5.645382 |
| 846 | 6 | 0 | 7.056077  | -5.059194  | -3.745157 |
| 847 | 1 | 0 | 6.455290  | -5.972539  | -3.615068 |
| 848 | 6 | 0 | 8.215239  | -5.556576  | -1.581618 |
| 849 | 1 | 0 | 7.864173  | -6.602965  | -1.796886 |
| 850 | 1 | 0 | 9.321524  | -5.611664  | -1.372595 |
| 851 | 6 | 0 | 6.801909  | 6.895972   | -3.644724 |
| 852 | 1 | 0 | 7.314823  | 5.994619   | -3.228843 |
| 853 | 1 | 0 | 5.737518  | 6.890003   | -3.304233 |
| 854 | 1 | 0 | 6.819320  | 6.827363   | -4.759078 |
| 855 | 1 | 0 | 19.673206 | 5.212908   | 2.907492  |
| 856 | 7 | 0 | 18.734161 | 5.237513   | 3.300252  |
| 857 | 6 | 0 | 17.638645 | 4.857110   | 2.598612  |
| 858 | 1 | 0 | 18.593345 | 5.587577   | 4.238695  |

|     |   |   |           |           |           |
|-----|---|---|-----------|-----------|-----------|
| 859 | 6 | 0 | 17.889194 | 4.372223  | 1.174804  |
| 860 | 8 | 0 | 16.495239 | 4.901234  | 3.074133  |
| 861 | 6 | 0 | 17.210044 | 5.302850  | 0.151933  |
| 862 | 1 | 0 | 17.461921 | 3.364018  | 1.105033  |
| 863 | 1 | 0 | 18.963481 | 4.296874  | 0.974144  |
| 864 | 6 | 0 | 17.366618 | 4.820858  | -1.305645 |
| 865 | 1 | 0 | 17.645650 | 6.307227  | 0.219391  |
| 866 | 1 | 0 | 16.145247 | 5.390986  | 0.390975  |
| 867 | 7 | 0 | 16.792973 | 5.802713  | -2.223190 |
| 868 | 6 | 0 | 16.649914 | 3.471768  | -1.508071 |
| 869 | 1 | 0 | 18.424026 | 4.721329  | -1.556545 |
| 870 | 6 | 0 | 17.539586 | 6.470363  | -3.128659 |
| 871 | 1 | 0 | 15.790337 | 6.009288  | -2.152888 |
| 872 | 8 | 0 | 15.420821 | 3.398621  | -1.370754 |
| 873 | 7 | 0 | 17.446931 | 2.422164  | -1.812222 |
| 874 | 6 | 0 | 16.777709 | 7.515976  | -3.980802 |
| 875 | 8 | 0 | 18.761482 | 6.295195  | -3.286592 |
| 876 | 1 | 0 | 18.449091 | 2.581473  | -1.931982 |
| 877 | 6 | 0 | 16.917919 | 1.068001  | -2.063453 |
| 878 | 7 | 0 | 17.411267 | 8.827005  | -3.771495 |
| 879 | 6 | 0 | 16.780158 | 7.044587  | -5.432678 |
| 880 | 1 | 0 | 15.742256 | 7.604385  | -3.633448 |
| 881 | 6 | 0 | 17.582008 | 0.120039  | -1.030025 |
| 882 | 6 | 0 | 17.207597 | 0.536281  | -3.464869 |
| 883 | 1 | 0 | 15.834883 | 1.107795  | -1.906060 |
| 884 | 6 | 0 | 16.725113 | 9.895347  | -3.285175 |
| 885 | 1 | 0 | 18.378714 | 8.960013  | -4.067853 |
| 886 | 6 | 0 | 16.064043 | 5.711288  | -5.536137 |
| 887 | 6 | 0 | 16.115281 | 8.057271  | -6.342071 |
| 888 | 1 | 0 | 17.850650 | 6.904926  | -5.763745 |
| 889 | 8 | 0 | 18.818385 | -0.002775 | -0.997563 |
| 890 | 7 | 0 | 16.733681 | -0.511130 | -0.186486 |
| 891 | 6 | 0 | 16.577384 | 1.415509  | -4.537044 |
| 892 | 6 | 0 | 16.687990 | -0.884995 | -3.573201 |
| 893 | 1 | 0 | 18.326138 | 0.522052  | -3.617448 |
| 894 | 6 | 0 | 17.529752 | 11.177613 | -3.137351 |
| 895 | 8 | 0 | 15.528599 | 9.853900  | -2.960306 |
| 896 | 1 | 0 | 16.000731 | 5.394531  | -6.604990 |
| 897 | 1 | 0 | 16.614378 | 4.922213  | -4.967925 |
| 898 | 1 | 0 | 15.027433 | 5.789592  | -5.125573 |
| 899 | 1 | 0 | 16.024349 | 7.640276  | -7.374460 |
| 900 | 1 | 0 | 15.091926 | 8.305873  | -5.968642 |
| 901 | 1 | 0 | 16.713208 | 8.998033  | -6.397912 |

|     |   |   |           |           |           |
|-----|---|---|-----------|-----------|-----------|
| 902 | 1 | 0 | 15.726551 | -0.341783 | -0.272733 |
| 903 | 6 | 0 | 17.222000 | -1.366546 | 0.905704  |
| 904 | 6 | 0 | 17.145183 | 1.135065  | -5.905738 |
| 905 | 1 | 0 | 15.466749 | 1.248128  | -4.545179 |
| 906 | 1 | 0 | 16.744500 | 2.499247  | -4.298098 |
| 907 | 1 | 0 | 16.821356 | -1.269901 | -4.613656 |
| 908 | 1 | 0 | 17.250495 | -1.563251 | -2.884212 |
| 909 | 1 | 0 | 15.601792 | -0.929180 | -3.313474 |
| 910 | 1 | 0 | 16.998291 | 11.979348 | -3.660041 |
| 911 | 1 | 0 | 17.561672 | 11.443677 | -2.075032 |
| 912 | 1 | 0 | 18.546405 | 11.088738 | -3.527027 |
| 913 | 6 | 0 | 16.626676 | -2.790115 | 0.748433  |
| 914 | 6 | 0 | 16.856258 | -0.851316 | 2.297288  |
| 915 | 1 | 0 | 18.312751 | -1.402637 | 0.815977  |
| 916 | 1 | 0 | 16.715912 | 1.848688  | -6.650303 |
| 917 | 1 | 0 | 18.256621 | 1.252189  | -5.904158 |
| 918 | 1 | 0 | 16.903578 | 0.096737  | -6.238174 |
| 919 | 8 | 0 | 15.404341 | -2.957973 | 0.639142  |
| 920 | 7 | 0 | 17.538462 | -3.789751 | 0.773906  |
| 921 | 6 | 0 | 17.381089 | -1.799825 | 3.358182  |
| 922 | 6 | 0 | 17.417881 | 0.536595  | 2.529782  |
| 923 | 1 | 0 | 15.731156 | -0.806268 | 2.380371  |
| 924 | 1 | 0 | 18.533081 | -3.554246 | 0.781057  |
| 925 | 6 | 0 | 17.177864 | -5.216931 | 0.740479  |
| 926 | 1 | 0 | 17.227993 | -1.359838 | 4.373585  |
| 927 | 1 | 0 | 16.842559 | -2.777632 | 3.318155  |
| 928 | 1 | 0 | 18.473434 | -1.986568 | 3.214492  |
| 929 | 1 | 0 | 17.217004 | 0.858579  | 3.580462  |
| 930 | 1 | 0 | 18.522514 | 0.545962  | 2.360383  |
| 931 | 1 | 0 | 16.945212 | 1.279325  | 1.843071  |
| 932 | 6 | 0 | 17.593235 | -5.822492 | 2.108366  |
| 933 | 1 | 0 | 16.094103 | -5.281894 | 0.592881  |
| 934 | 8 | 0 | 18.795725 | -5.850594 | 2.425264  |
| 935 | 7 | 0 | 16.593369 | -6.274365 | 2.900013  |
| 936 | 6 | 0 | 17.759410 | -5.467128 | -1.702492 |
| 937 | 1 | 0 | 15.619229 | -6.193583 | 2.592144  |
| 938 | 6 | 0 | 16.896661 | -6.754527 | 4.254375  |
| 939 | 6 | 0 | 18.578049 | -4.413192 | -2.134004 |
| 940 | 6 | 0 | 16.262620 | -8.140002 | 4.519720  |
| 941 | 6 | 0 | 16.538306 | -5.794264 | 5.371257  |
| 942 | 1 | 0 | 17.985170 | -6.868513 | 4.285857  |
| 943 | 6 | 0 | 18.474948 | -3.916671 | -3.427907 |
| 944 | 1 | 0 | 19.313403 | -3.970351 | -1.439633 |

|     |   |   |           |            |           |
|-----|---|---|-----------|------------|-----------|
| 945 | 8 | 0 | 15.076488 | -8.406209  | 4.272041  |
| 946 | 7 | 0 | 17.119437 | -9.029772  | 5.069923  |
| 947 | 6 | 0 | 15.092014 | -5.355228  | 5.418210  |
| 948 | 1 | 0 | 16.808258 | -6.289716  | 6.344018  |
| 949 | 1 | 0 | 17.192920 | -4.882299  | 5.275737  |
| 950 | 6 | 0 | 17.540133 | -4.488848  | -4.307129 |
| 951 | 1 | 0 | 19.111364 | -3.087542  | -3.771382 |
| 952 | 1 | 0 | 18.093487 | -8.757450  | 5.192807  |
| 953 | 6 | 0 | 16.700316 | -10.376404 | 5.431321  |
| 954 | 6 | 0 | 14.878345 | -4.421762  | 6.592891  |
| 955 | 1 | 0 | 14.811838 | -4.834252  | 4.464127  |
| 956 | 1 | 0 | 14.425716 | -6.255671  | 5.506615  |
| 957 | 8 | 0 | 17.483068 | -3.956124  | -5.575050 |
| 958 | 1 | 0 | 17.504948 | -10.857568 | 5.993736  |
| 959 | 1 | 0 | 15.799553 | -10.345368 | 6.053833  |
| 960 | 1 | 0 | 16.480648 | -10.980071 | 4.541859  |
| 961 | 6 | 0 | 13.418603 | -3.983810  | 6.679481  |
| 962 | 1 | 0 | 15.175608 | -4.935609  | 7.545033  |
| 963 | 1 | 0 | 15.542432 | -3.522849  | 6.480740  |
| 964 | 1 | 0 | 16.751934 | -4.383281  | -6.044987 |
| 965 | 7 | 0 | 13.157897 | -3.095484  | 7.786197  |
| 966 | 1 | 0 | 13.127671 | -3.530314  | 5.681487  |
| 967 | 1 | 0 | 12.775342 | -4.901171  | 6.824418  |
| 968 | 1 | 0 | 13.707645 | -2.262972  | 7.720345  |
| 969 | 1 | 0 | 12.188132 | -2.852605  | 7.817006  |
| 970 | 6 | 0 | 16.722437 | -5.549071  | -3.893561 |
| 971 | 1 | 0 | 15.991418 | -5.989638  | -4.585759 |
| 972 | 6 | 0 | 16.835921 | -6.027420  | -2.590457 |
| 973 | 1 | 0 | 16.187412 | -6.853156  | -2.259354 |
| 974 | 6 | 0 | 17.909885 | -6.011480  | -0.327977 |
| 975 | 1 | 0 | 17.517399 | -7.064389  | -0.287939 |
| 976 | 1 | 0 | 19.006921 | -6.053572  | -0.069760 |
| 977 | 1 | 0 | 14.819698 | 4.897562   | 3.822547  |
| 978 | 7 | 0 | 13.879200 | 4.864409   | 4.217342  |
| 979 | 6 | 0 | 12.790190 | 4.554429   | 3.474646  |
| 980 | 1 | 0 | 13.729547 | 5.122951   | 5.183646  |
| 981 | 6 | 0 | 13.051587 | 4.229771   | 2.008355  |
| 982 | 8 | 0 | 11.642979 | 4.538748   | 3.945680  |
| 983 | 6 | 0 | 12.408946 | 5.289411   | 1.092462  |
| 984 | 1 | 0 | 12.602445 | 3.247528   | 1.815979  |
| 985 | 1 | 0 | 14.127338 | 4.156379   | 1.816166  |
| 986 | 6 | 0 | 12.601264 | 4.985662   | -0.406662 |
| 987 | 1 | 0 | 12.854338 | 6.271234   | 1.293957  |



|      |   |   |           |           |           |
|------|---|---|-----------|-----------|-----------|
| 988  | 1 | 0 | 11.338697 | 5.362045  | 1.312205  |
| 989  | 7 | 0 | 12.064193 | 6.074628  | -1.218883 |
| 990  | 6 | 0 | 11.879218 | 3.680924  | -0.794326 |
| 991  | 1 | 0 | 13.664390 | 4.903118  | -0.640926 |
| 992  | 6 | 0 | 12.836734 | 6.807181  | -2.049685 |
| 993  | 1 | 0 | 11.064946 | 6.292888  | -1.143636 |
| 994  | 8 | 0 | 10.649336 | 3.589074  | -0.663821 |
| 995  | 7 | 0 | 12.673385 | 2.690430  | -1.256020 |
| 996  | 6 | 0 | 12.110175 | 7.953811  | -2.794688 |
| 997  | 8 | 0 | 14.055403 | 6.621591  | -2.210126 |
| 998  | 1 | 0 | 13.678884 | 2.858102  | -1.343498 |
| 999  | 6 | 0 | 12.145656 | 1.384038  | -1.685459 |
| 1000 | 7 | 0 | 12.748154 | 9.215632  | -2.392277 |
| 1001 | 6 | 0 | 12.171360 | 7.671405  | -4.293460 |
| 1002 | 1 | 0 | 11.061921 | 8.008960  | -2.480467 |
| 1003 | 6 | 0 | 12.778204 | 0.314587  | -0.756818 |
| 1004 | 6 | 0 | 12.464358 | 1.028053  | -3.135637 |
| 1005 | 1 | 0 | 11.059114 | 1.410340  | -1.550723 |
| 1006 | 6 | 0 | 12.060001 | 10.227136 | -1.803925 |
| 1007 | 1 | 0 | 13.739577 | 9.345911  | -2.603919 |
| 1008 | 6 | 0 | 11.463695 | 6.364081  | -4.594953 |
| 1009 | 6 | 0 | 11.539325 | 8.793419  | -5.091005 |
| 1010 | 1 | 0 | 13.254574 | 7.572894  | -4.597198 |
| 1011 | 8 | 0 | 14.012474 | 0.188583  | -0.692525 |
| 1012 | 7 | 0 | 11.901522 | -0.413795 | -0.030746 |
| 1013 | 6 | 0 | 11.872192 | 2.049481  | -4.098026 |
| 1014 | 6 | 0 | 11.924037 | -0.357182 | -3.435626 |
| 1015 | 1 | 0 | 13.585786 | 1.013756  | -3.264559 |
| 1016 | 6 | 0 | 12.889536 | 11.450838 | -1.443415 |
| 1017 | 8 | 0 | 10.845065 | 10.183628 | -1.551782 |
| 1018 | 1 | 0 | 11.468994 | 6.172860  | -5.695026 |
| 1019 | 1 | 0 | 11.976406 | 5.511132  | -4.086868 |
| 1020 | 1 | 0 | 10.402891 | 6.402390  | -4.245551 |
| 1021 | 1 | 0 | 11.494227 | 8.514282  | -6.171712 |
| 1022 | 1 | 0 | 10.499786 | 8.990892  | -4.731934 |
| 1023 | 1 | 0 | 12.133229 | 9.733723  | -4.997903 |
| 1024 | 1 | 0 | 10.897633 | -0.231814 | -0.130187 |
| 1025 | 6 | 0 | 12.342418 | -1.416530 | 0.949500  |
| 1026 | 6 | 0 | 12.402900 | 1.889235  | -5.500316 |
| 1027 | 1 | 0 | 10.753739 | 1.945767  | -4.101860 |
| 1028 | 1 | 0 | 12.106269 | 3.089682  | -3.747277 |
| 1029 | 1 | 0 | 12.118717 | -0.628626 | -4.501821 |
| 1030 | 1 | 0 | 12.423378 | -1.123698 | -2.792341 |

|      |   |   |           |           |           |
|------|---|---|-----------|-----------|-----------|
| 1031 | 1 | 0 | 10.822171 | -0.399060 | -3.252706 |
| 1032 | 1 | 0 | 12.419134 | 12.332153 | -1.891332 |
| 1033 | 1 | 0 | 12.860636 | 11.579653 | -0.355873 |
| 1034 | 1 | 0 | 13.926908 | 11.371000 | -1.777792 |
| 1035 | 6 | 0 | 11.769184 | -2.798565 | 0.544653  |
| 1036 | 6 | 0 | 11.887028 | -1.113754 | 2.376229  |
| 1037 | 1 | 0 | 13.437003 | -1.437466 | 0.919235  |
| 1038 | 1 | 0 | 12.020582 | 2.714884  | -6.148638 |
| 1039 | 1 | 0 | 13.519779 | 1.924002  | -5.506994 |
| 1040 | 1 | 0 | 12.079612 | 0.918156  | -5.946883 |
| 1041 | 8 | 0 | 10.551609 | -2.953625 | 0.375276  |
| 1042 | 7 | 0 | 12.689704 | -3.780386 | 0.421370  |
| 1043 | 6 | 0 | 12.316789 | -2.228171 | 3.310728  |
| 1044 | 6 | 0 | 12.451585 | 0.206908  | 2.858204  |
| 1045 | 1 | 0 | 10.759090 | -1.053256 | 2.388890  |
| 1046 | 1 | 0 | 13.681469 | -3.551886 | 0.526906  |
| 1047 | 6 | 0 | 12.338536 | -5.189491 | 0.182652  |
| 1048 | 1 | 0 | 12.089594 | -1.945888 | 4.367573  |
| 1049 | 1 | 0 | 11.769338 | -3.174039 | 3.077868  |
| 1050 | 1 | 0 | 13.414016 | -2.419430 | 3.222479  |
| 1051 | 1 | 0 | 12.166509 | 0.377581  | 3.924728  |
| 1052 | 1 | 0 | 13.566446 | 0.206601  | 2.784227  |
| 1053 | 1 | 0 | 12.054657 | 1.056761  | 2.252462  |
| 1054 | 6 | 0 | 12.763303 | -5.963537 | 1.456838  |
| 1055 | 1 | 0 | 11.255463 | -5.242497 | 0.026030  |
| 1056 | 8 | 0 | 13.963688 | -5.991522 | 1.777520  |
| 1057 | 7 | 0 | 11.776377 | -6.549466 | 2.171996  |
| 1058 | 6 | 0 | 12.860641 | -5.144193 | -2.285554 |
| 1059 | 1 | 0 | 10.800127 | -6.437652 | 1.881698  |
| 1060 | 6 | 0 | 12.092930 | -7.186401 | 3.457320  |
| 1061 | 6 | 0 | 13.595253 | -3.994138 | -2.607830 |
| 1062 | 6 | 0 | 11.482619 | -8.602588 | 3.555345  |
| 1063 | 6 | 0 | 11.725779 | -6.371967 | 4.681350  |
| 1064 | 1 | 0 | 13.184083 | -7.285437 | 3.473236  |
| 1065 | 6 | 0 | 13.437773 | -3.371809 | -3.840590 |
| 1066 | 1 | 0 | 14.307960 | -3.577521 | -1.875870 |
| 1067 | 8 | 0 | 10.295874 | -8.855848 | 3.293516  |
| 1068 | 7 | 0 | 12.363940 | -9.536727 | 3.977424  |
| 1069 | 6 | 0 | 10.273782 | -5.965110 | 4.795616  |
| 1070 | 1 | 0 | 12.016113 | -6.971644 | 5.587225  |
| 1071 | 1 | 0 | 12.362971 | -5.442603 | 4.682638  |
| 1072 | 6 | 0 | 12.533893 | -3.913989 | -4.769431 |
| 1073 | 1 | 0 | 14.005348 | -2.465130 | -4.096986 |

|      |   |   |           |            |           |
|------|---|---|-----------|------------|-----------|
| 1074 | 1 | 0 | 13.336334 | -9.262845  | 4.119011  |
| 1075 | 6 | 0 | 11.972889 | -10.924135 | 4.179951  |
| 1076 | 6 | 0 | 10.068770 | -5.168726  | 6.069110  |
| 1077 | 1 | 0 | 9.971423  | -5.347351  | 3.908347  |
| 1078 | 1 | 0 | 9.621530  | -6.879764  | 4.794932  |
| 1079 | 8 | 0 | 12.432240 | -3.264409  | -5.979038 |
| 1080 | 1 | 0 | 12.819802 | -11.469561 | 4.604469  |
| 1081 | 1 | 0 | 11.123767 | -10.992392 | 4.869409  |
| 1082 | 1 | 0 | 11.682969 | -11.398876 | 3.234461  |
| 1083 | 6 | 0 | 8.608720  | -4.752435  | 6.224647  |
| 1084 | 1 | 0 | 10.383243 | -5.782600  | 6.954160  |
| 1085 | 1 | 0 | 10.725414 | -4.257384  | 6.047777  |
| 1086 | 1 | 0 | 11.695705 | -3.659675  | -6.467983 |
| 1087 | 7 | 0 | 8.357260  | -4.005299  | 7.433404  |
| 1088 | 1 | 0 | 8.304395  | -4.182533  | 5.292330  |
| 1089 | 1 | 0 | 7.970600  | -5.683717  | 6.266101  |
| 1090 | 1 | 0 | 8.913581  | -3.175247  | 7.468986  |
| 1091 | 1 | 0 | 7.389587  | -3.760007  | 7.495799  |
| 1092 | 6 | 0 | 11.794698 | -5.064403  | -4.463153 |
| 1093 | 1 | 0 | 11.083150 | -5.477720  | -5.191435 |
| 1094 | 6 | 0 | 11.961220 | -5.668582  | -3.219413 |
| 1095 | 1 | 0 | 11.375388 | -6.567307  | -2.972321 |
| 1096 | 6 | 0 | 13.076196 | -5.825613  | -0.982864 |
| 1097 | 1 | 0 | 12.733158 | -6.894556  | -1.049568 |
| 1098 | 1 | 0 | 14.180314 | -5.843160  | -0.756222 |
| 1099 | 1 | 0 | 24.590988 | 5.264504   | 2.041131  |
| 1100 | 7 | 0 | 23.666293 | 5.359573   | 2.433690  |
| 1101 | 6 | 0 | 22.548621 | 4.989161   | 1.745922  |
| 1102 | 1 | 0 | 23.559727 | 5.774472   | 3.350140  |
| 1103 | 6 | 0 | 22.774339 | 4.391887   | 0.361703  |
| 1104 | 8 | 0 | 21.418627 | 5.129215   | 2.220388  |
| 1105 | 6 | 0 | 22.064035 | 5.230974   | -0.717921 |
| 1106 | 1 | 0 | 22.360274 | 3.375594   | 0.393380  |
| 1107 | 1 | 0 | 23.844712 | 4.301772   | 0.139120  |
| 1108 | 6 | 0 | 22.155876 | 4.624222   | -2.135521 |
| 1109 | 1 | 0 | 22.505641 | 6.233575   | -0.758674 |
| 1110 | 1 | 0 | 21.009253 | 5.345323   | -0.449248 |
| 1111 | 7 | 0 | 21.528860 | 5.501664   | -3.113961 |
| 1112 | 6 | 0 | 21.434765 | 3.267728   | -2.182303 |
| 1113 | 1 | 0 | 23.206582 | 4.524220   | -2.426559 |
| 1114 | 6 | 0 | 22.262915 | 6.264698   | -3.964476 |
| 1115 | 1 | 0 | 20.508626 | 5.600702   | -3.106891 |
| 1116 | 8 | 0 | 20.207471 | 3.218740   | -2.026610 |

|      |   |   |           |           |           |
|------|---|---|-----------|-----------|-----------|
| 1117 | 7 | 0 | 22.211207 | 2.179337  | -2.382934 |
| 1118 | 6 | 0 | 21.428490 | 7.121603  | -4.948187 |
| 1119 | 8 | 0 | 23.498548 | 6.304010  | -3.975033 |
| 1120 | 1 | 0 | 23.217981 | 2.281574  | -2.430462 |
| 1121 | 6 | 0 | 21.690966 | 0.800319  | -2.347996 |
| 1122 | 7 | 0 | 22.065520 | 8.444137  | -4.995240 |
| 1123 | 6 | 0 | 21.356396 | 6.406568  | -6.295644 |
| 1124 | 1 | 0 | 20.410326 | 7.260552  | -4.569810 |
| 1125 | 6 | 0 | 22.389235 | 0.102172  | -1.148036 |
| 1126 | 6 | 0 | 21.956070 | 0.007187  | -3.624145 |
| 1127 | 1 | 0 | 20.610412 | 0.864298  | -2.182869 |
| 1128 | 6 | 0 | 21.395666 | 9.602446  | -4.761537 |
| 1129 | 1 | 0 | 23.076458 | 8.446993  | -5.058614 |
| 1130 | 6 | 0 | 20.667986 | 7.268062  | -7.335384 |
| 1131 | 1 | 0 | 22.404155 | 6.186427  | -6.648515 |
| 1132 | 8 | 0 | 23.601216 | 0.250436  | -0.957429 |
| 1133 | 7 | 0 | 21.567307 | -0.641631 | -0.358722 |
| 1134 | 6 | 0 | 21.273373 | 0.648291  | -4.827243 |
| 1135 | 6 | 0 | 21.460942 | -1.415379 | -3.436226 |
| 1136 | 1 | 0 | 23.067517 | -0.019132 | -3.812177 |
| 1137 | 6 | 0 | 22.245802 | 10.864579 | -4.747408 |
| 1138 | 8 | 0 | 20.172750 | 9.655155  | -4.569271 |
| 1139 | 1 | 0 | 20.520209 | 6.685204  | -8.276880 |
| 1140 | 1 | 0 | 19.669397 | 7.605550  | -6.964860 |
| 1141 | 1 | 0 | 21.279978 | 8.169174  | -7.578002 |
| 1142 | 1 | 0 | 20.555641 | -0.588388 | -0.504176 |
| 1143 | 6 | 0 | 22.075304 | -1.310799 | 0.842892  |
| 1144 | 6 | 0 | 21.876852 | 0.187720  | -6.130307 |
| 1145 | 1 | 0 | 20.178865 | 0.396625  | -4.806992 |
| 1146 | 1 | 0 | 21.352129 | 1.766137  | -4.773944 |
| 1147 | 1 | 0 | 21.439448 | -1.950180 | -4.416357 |
| 1148 | 1 | 0 | 22.136047 | -1.977994 | -2.747399 |
| 1149 | 1 | 0 | 20.427694 | -1.418698 | -3.007416 |
| 1150 | 1 | 0 | 21.857535 | 11.554821 | -5.502852 |
| 1151 | 1 | 0 | 22.137575 | 11.348049 | -3.771213 |
| 1152 | 1 | 0 | 23.306439 | 10.678115 | -4.941594 |
| 1153 | 6 | 0 | 21.478718 | -2.738807 | 0.895299  |
| 1154 | 6 | 0 | 21.736501 | -0.610846 | 2.162005  |
| 1155 | 1 | 0 | 23.166618 | -1.340381 | 0.737194  |
| 1156 | 1 | 0 | 21.352332 | 0.676347  | -6.987103 |
| 1157 | 1 | 0 | 22.960022 | 0.455747  | -6.181249 |
| 1158 | 1 | 0 | 21.784579 | -0.918820 | -6.249136 |
| 1159 | 8 | 0 | 20.277595 | -2.930568 | 0.668604  |

|      |   |   |           |            |           |
|------|---|---|-----------|------------|-----------|
| 1160 | 7 | 0 | 22.352954 | -3.724547  | 1.215440  |
| 1161 | 6 | 0 | 22.579012 | -1.178980  | 3.288068  |
| 1162 | 6 | 0 | 21.957437 | 0.886209   | 2.066274  |
| 1163 | 1 | 0 | 20.647055 | -0.794222  | 2.394643  |
| 1164 | 1 | 0 | 23.284816 | -3.461709  | 1.519021  |
| 1165 | 6 | 0 | 21.931890 | -5.080788  | 1.597730  |
| 1166 | 1 | 0 | 22.355436 | -0.634950  | 4.238022  |
| 1167 | 1 | 0 | 22.366767 | -2.262804  | 3.454807  |
| 1168 | 1 | 0 | 23.667016 | -1.060695  | 3.064683  |
| 1169 | 1 | 0 | 21.949829 | 1.341475   | 3.086192  |
| 1170 | 1 | 0 | 22.940330 | 1.106823   | 1.581991  |
| 1171 | 1 | 0 | 21.148118 | 1.367901   | 1.465603  |
| 1172 | 6 | 0 | 22.253047 | -5.253435  | 3.107789  |
| 1173 | 1 | 0 | 20.857837 | -5.171268  | 1.403390  |
| 1174 | 8 | 0 | 23.290701 | -4.774779  | 3.576209  |
| 1175 | 7 | 0 | 21.376298 | -6.011079  | 3.824133  |
| 1176 | 6 | 0 | 22.600373 | -6.120064  | -0.602425 |
| 1177 | 1 | 0 | 20.423697 | -6.142592  | 3.472380  |
| 1178 | 6 | 0 | 21.664929 | -6.264287  | 5.238785  |
| 1179 | 6 | 0 | 23.550740 | -5.389288  | -1.328726 |
| 1180 | 6 | 0 | 20.946179 | -7.546658  | 5.709116  |
| 1181 | 6 | 0 | 21.353023 | -5.121352  | 6.188654  |
| 1182 | 1 | 0 | 22.750749 | -6.422406  | 5.300642  |
| 1183 | 6 | 0 | 23.510479 | -5.347655  | -2.717156 |
| 1184 | 1 | 0 | 24.339905 | -4.839608  | -0.792845 |
| 1185 | 8 | 0 | 19.830608 | -7.886624  | 5.297748  |
| 1186 | 7 | 0 | 21.625458 | -8.261954  | 6.641092  |
| 1187 | 6 | 0 | 19.907693 | -4.675558  | 6.178730  |
| 1188 | 1 | 0 | 21.638599 | -5.440812  | 7.226860  |
| 1189 | 1 | 0 | 22.010973 | -4.250574  | 5.914813  |
| 1190 | 6 | 0 | 22.499822 | -6.053829  | -3.391217 |
| 1191 | 1 | 0 | 24.251438 | -4.776747  | -3.293759 |
| 1192 | 1 | 0 | 22.550656 | -7.954288  | 6.907257  |
| 1193 | 6 | 0 | 21.074114 | -9.461434  | 7.262395  |
| 1194 | 6 | 0 | 19.680326 | -3.606434  | 7.226807  |
| 1195 | 1 | 0 | 19.635319 | -4.276011  | 5.165711  |
| 1196 | 1 | 0 | 19.236637 | -5.556000  | 6.372250  |
| 1197 | 8 | 0 | 22.512485 | -5.982131  | -4.764917 |
| 1198 | 1 | 0 | 21.735967 | -9.775274  | 8.073376  |
| 1199 | 1 | 0 | 20.080290 | -9.256603  | 7.673688  |
| 1200 | 1 | 0 | 20.989093 | -10.278394 | 6.536474  |
| 1201 | 6 | 0 | 18.220925 | -3.155545  | 7.219482  |
| 1202 | 1 | 0 | 19.948207 | -4.005256  | 8.240383  |

|      |   |   |           |           |           |
|------|---|---|-----------|-----------|-----------|
| 1203 | 1 | 0 | 20.353016 | -2.732236 | 7.023539  |
| 1204 | 1 | 0 | 21.740470 | -6.463925 | -5.095994 |
| 1205 | 7 | 0 | 17.925874 | -2.177703 | 8.237987  |
| 1206 | 1 | 0 | 17.972349 | -2.786916 | 6.176595  |
| 1207 | 1 | 0 | 17.563375 | -4.053830 | 7.412528  |
| 1208 | 1 | 0 | 18.504629 | -1.367957 | 8.142629  |
| 1209 | 1 | 0 | 16.963822 | -1.907968 | 8.194745  |
| 1210 | 6 | 0 | 21.543910 | -6.791795 | -2.679518 |
| 1211 | 1 | 0 | 20.754862 | -7.339112 | -3.213879 |
| 1212 | 6 | 0 | 21.600472 | -6.816975 | -1.288523 |
| 1213 | 1 | 0 | 20.849245 | -7.392599 | -0.725766 |
| 1214 | 6 | 0 | 22.685016 | -6.189610 | 0.879391  |
| 1215 | 1 | 0 | 22.255351 | -7.166128 | 1.236720  |
| 1216 | 1 | 0 | 23.766779 | -6.166654 | 1.189412  |
| 1217 | 6 | 0 | 20.609608 | 5.095047  | -6.136787 |
| 1218 | 1 | 0 | 21.235688 | 4.345205  | -5.596010 |
| 1219 | 1 | 0 | 19.661167 | 5.248636  | -5.563184 |
| 1220 | 1 | 0 | 20.356126 | 4.675358  | -7.140187 |

P Pl (Ac-VQIINK-NHMe)<sub>1</sub>

|    |   |   |           |           |           |
|----|---|---|-----------|-----------|-----------|
| 1  | 6 | 0 | 12.920503 | -0.711437 | 0.647949  |
| 2  | 6 | 0 | 11.659353 | -1.377181 | 0.110123  |
| 3  | 8 | 0 | 11.700702 | -2.407577 | -0.563587 |
| 4  | 1 | 0 | 10.458734 | 0.056175  | 1.038206  |
| 5  | 7 | 0 | 10.487785 | -0.740137 | 0.411897  |
| 6  | 6 | 0 | 9.183765  | -1.261903 | -0.000953 |
| 7  | 6 | 0 | 8.178852  | -0.095496 | 0.162851  |
| 8  | 8 | 0 | 8.407650  | 0.833560  | 0.954024  |
| 9  | 6 | 0 | 8.733161  | -2.508685 | 0.759889  |
| 10 | 6 | 0 | 8.377840  | -2.210469 | 2.199880  |
| 11 | 6 | 0 | 7.586371  | -3.209332 | 0.060258  |
| 12 | 1 | 0 | 13.583535 | -0.490808 | -0.194427 |
| 13 | 1 | 0 | 12.726656 | 0.211353  | 1.204237  |
| 14 | 1 | 0 | 13.440272 | -1.422190 | 1.298397  |
| 15 | 1 | 0 | 9.252864  | -1.537824 | -1.062929 |
| 16 | 1 | 0 | 9.613671  | -3.221253 | 0.751528  |
| 17 | 1 | 0 | 8.045568  | -3.145369 | 2.712494  |
| 18 | 1 | 0 | 9.260346  | -1.800277 | 2.747080  |
| 19 | 1 | 0 | 7.550914  | -1.461179 | 2.258095  |
| 20 | 1 | 0 | 7.494477  | -4.251021 | 0.455141  |
| 21 | 1 | 0 | 6.611539  | -2.693421 | 0.238552  |
| 22 | 1 | 0 | 7.765292  | -3.269902 | -1.040608 |
| 23 | 1 | 0 | 6.902767  | -1.011959 | -1.157994 |
| 24 | 7 | 0 | 7.086195  | -0.158384 | -0.629550 |
| 25 | 6 | 0 | 5.900734  | 0.683308  | -0.486261 |
| 26 | 6 | 0 | 4.689896  | -0.251859 | -0.701432 |
| 27 | 8 | 0 | 4.825437  | -1.335898 | -1.282425 |
| 28 | 6 | 0 | 5.865117  | 1.837062  | -1.520073 |
| 29 | 6 | 0 | 6.949172  | 2.912227  | -1.301595 |
| 30 | 6 | 0 | 6.611233  | 3.819988  | -0.113040 |
| 31 | 8 | 0 | 5.789576  | 4.730746  | -0.215084 |
| 32 | 7 | 0 | 7.277143  | 3.536413  | 1.047310  |
| 33 | 1 | 0 | 7.007145  | 4.057047  | 1.871685  |
| 34 | 1 | 0 | 7.794519  | 2.664033  | 1.144980  |
| 35 | 1 | 0 | 5.883100  | 1.094454  | 0.529038  |
| 36 | 1 | 0 | 5.981072  | 1.396429  | -2.518163 |
| 37 | 1 | 0 | 4.881907  | 2.320875  | -1.490923 |
| 38 | 1 | 0 | 7.933219  | 2.447254  | -1.185539 |
| 39 | 1 | 0 | 6.977843  | 3.560006  | -2.183355 |
| 40 | 1 | 0 | 3.430089  | 1.078187  | 0.289275  |
| 41 | 7 | 0 | 3.506280  | 0.219174  | -0.251717 |

|    |   |   |           |           |           |
|----|---|---|-----------|-----------|-----------|
| 42 | 6 | 0 | 2.238400  | -0.502446 | -0.410936 |
| 43 | 6 | 0 | 1.136739  | 0.533766  | -0.046133 |
| 44 | 8 | 0 | 1.407967  | 1.534907  | 0.624128  |
| 45 | 6 | 0 | 2.135031  | -1.775125 | 0.427207  |
| 46 | 6 | 0 | 0.977664  | -2.650269 | -0.040477 |
| 47 | 6 | 0 | 2.023848  | -1.472008 | 1.906092  |
| 48 | 6 | 0 | 1.219577  | -4.106194 | 0.272227  |
| 49 | 1 | 0 | 2.138840  | -0.790053 | -1.467914 |
| 50 | 1 | 0 | 3.090792  | -2.356720 | 0.253345  |
| 51 | 1 | 0 | 0.026575  | -2.320088 | 0.454763  |
| 52 | 1 | 0 | 0.837905  | -2.539797 | -1.149213 |
| 53 | 1 | 0 | 1.930224  | -2.421731 | 2.486359  |
| 54 | 1 | 0 | 2.929372  | -0.926535 | 2.265410  |
| 55 | 1 | 0 | 1.127606  | -0.838248 | 2.115948  |
| 56 | 1 | 0 | 0.346656  | -4.718537 | -0.060247 |
| 57 | 1 | 0 | 2.131920  | -4.478148 | -0.254196 |
| 58 | 1 | 0 | 1.360459  | -4.259488 | 1.369475  |
| 59 | 1 | 0 | -0.287970 | -0.549850 | -1.108601 |
| 60 | 7 | 0 | -0.099730 | 0.258439  | -0.519506 |
| 61 | 6 | 0 | -1.269537 | 1.106629  | -0.261205 |
| 62 | 6 | 0 | -2.497188 | 0.236311  | -0.644994 |
| 63 | 8 | 0 | -2.369186 | -0.771709 | -1.352854 |
| 64 | 6 | 0 | -1.246455 | 2.438729  | -1.008147 |
| 65 | 6 | 0 | -1.459923 | 2.257784  | -2.495662 |
| 66 | 6 | 0 | -2.256480 | 3.421247  | -0.425896 |
| 67 | 1 | 0 | -1.302896 | 1.328419  | 0.815433  |
| 68 | 1 | 0 | -0.215956 | 2.880685  | -0.847972 |
| 69 | 1 | 0 | -1.447237 | 3.250617  | -3.007392 |
| 70 | 1 | 0 | -0.652891 | 1.623624  | -2.935130 |
| 71 | 1 | 0 | -2.442697 | 1.766852  | -2.700397 |
| 72 | 1 | 0 | -3.260951 | 3.265685  | -0.901781 |
| 73 | 1 | 0 | -2.372453 | 3.244174  | 0.676942  |
| 74 | 1 | 0 | -3.788254 | 1.495124  | 0.401099  |
| 75 | 7 | 0 | -3.681602 | 0.628297  | -0.127292 |
| 76 | 6 | 0 | -4.941463 | 0.000991  | -0.487119 |
| 77 | 6 | 0 | -6.049506 | 0.966263  | -0.002018 |
| 78 | 8 | 0 | -5.764393 | 1.988585  | 0.632427  |
| 79 | 1 | 0 | -4.999249 | -0.105031 | -1.577034 |
| 80 | 1 | 0 | -7.410437 | -0.359510 | -0.716385 |
| 81 | 7 | 0 | -7.305725 | 0.582366  | -0.318309 |
| 82 | 6 | 0 | -8.442086 | 1.180422  | 0.378441  |
| 83 | 6 | 0 | -8.477837 | 0.675704  | 1.859257  |
| 84 | 8 | 0 | -7.885743 | -0.339008 | 2.219706  |



|     |   |   |            |           |           |
|-----|---|---|------------|-----------|-----------|
| 85  | 6 | 0 | -9.765446  | 0.902193  | -0.303959 |
| 86  | 6 | 0 | -10.123766 | -0.568957 | -0.357391 |
| 87  | 6 | 0 | -11.537366 | -0.757935 | -0.864985 |
| 88  | 6 | 0 | -11.880347 | -2.246175 | -0.916983 |
| 89  | 7 | 0 | -13.232797 | -2.504717 | -1.351787 |
| 90  | 1 | 0 | -13.426655 | -2.043989 | -2.218436 |
| 91  | 1 | 0 | -13.378548 | -3.488085 | -1.463159 |
| 92  | 1 | 0 | -9.612991  | 2.313209  | 2.326538  |
| 93  | 7 | 0 | -9.226400  | 1.453698  | 2.693791  |
| 94  | 6 | 0 | -9.395631  | 1.162871  | 4.110939  |
| 95  | 1 | 0 | -8.283829  | 2.268072  | 0.398115  |
| 96  | 1 | 0 | -10.567522 | 1.462294  | 0.248245  |
| 97  | 1 | 0 | -9.736936  | 1.314439  | -1.348871 |
| 98  | 1 | 0 | -9.408959  | -1.119312 | -1.027526 |
| 99  | 1 | 0 | -10.023938 | -1.017687 | 0.667365  |
| 100 | 1 | 0 | -12.259258 | -0.224976 | -0.192370 |
| 101 | 1 | 0 | -11.634293 | -0.305276 | -1.886565 |
| 102 | 1 | 0 | -11.110277 | -2.758229 | -1.568871 |
| 103 | 1 | 0 | -11.773208 | -2.678463 | 0.119219  |
| 104 | 1 | 0 | -10.458181 | 1.143789  | 4.380673  |
| 105 | 1 | 0 | -8.958993  | 0.180866  | 4.302441  |
| 106 | 1 | 0 | -8.881713  | 1.905191  | 4.734574  |
| 107 | 6 | 0 | -1.826244  | 4.851365  | -0.640963 |
| 108 | 1 | 0 | -1.698133  | 5.068447  | -1.728968 |
| 109 | 1 | 0 | -2.597607  | 5.547238  | -0.230670 |
| 110 | 1 | 0 | -0.856340  | 5.055408  | -0.125657 |
| 111 | 6 | 0 | -5.086928  | -1.409757 | 0.159278  |
| 112 | 1 | 0 | -4.085673  | -1.812213 | 0.326976  |
| 113 | 1 | 0 | -5.596993  | -1.327167 | 1.127532  |
| 114 | 6 | 0 | -5.899851  | -2.372676 | -0.700788 |
| 115 | 1 | 0 | -4.509904  | -3.889858 | -0.423239 |
| 116 | 8 | 0 | -6.941042  | -2.038642 | -1.281553 |
| 117 | 7 | 0 | -5.426404  | -3.647823 | -0.769490 |
| 118 | 1 | 0 | -5.923125  | -4.310470 | -1.350611 |

P Pl (Ac-VQIINK-NHMe)<sub>2</sub>

P Pl (Ac-VQIINK-NHMe)<sub>3</sub>

P Pl (Ac-VQIINK-NHMe)<sub>4</sub>

P Pl (Ac-VQIINK-NHMe)<sub>5</sub>

P Pl (Ac-VQIINK-NHMe)<sub>6</sub>

P Pl (Ac-VQIINK-NHMe)<sub>7</sub>

|    |   |   |            |           |           |
|----|---|---|------------|-----------|-----------|
| 1  | 6 | 0 | -13.264654 | 11.117540 | 4.942744  |
| 2  | 6 | 0 | -13.960994 | 10.331551 | 3.838823  |
| 3  | 1 | 0 | -13.769586 | 12.083043 | 5.051853  |
| 4  | 1 | 0 | -13.389983 | 10.573184 | 5.884893  |
| 5  | 1 | 0 | -12.200192 | 11.272568 | 4.746252  |
| 6  | 8 | 0 | -15.171643 | 10.090557 | 3.872193  |
| 7  | 7 | 0 | -13.139649 | 9.920750  | 2.825408  |
| 8  | 1 | 0 | -12.137629 | 10.113668 | 2.867102  |
| 9  | 6 | 0 | -13.656626 | 9.110023  | 1.719033  |
| 10 | 6 | 0 | -13.125342 | 7.668421  | 1.905575  |
| 11 | 6 | 0 | -13.247231 | 9.598582  | 0.333667  |
| 12 | 1 | 0 | -14.749692 | 9.139590  | 1.808078  |
| 13 | 8 | 0 | -11.908829 | 7.435184  | 1.832606  |
| 14 | 7 | 0 | -14.049058 | 6.722557  | 2.188383  |
| 15 | 6 | 0 | -13.939516 | 8.763272  | -0.726287 |
| 16 | 6 | 0 | -13.580404 | 11.062953 | 0.137675  |
| 17 | 1 | 0 | -12.130635 | 9.463986  | 0.224884  |
| 18 | 1 | 0 | -15.030569 | 6.974424  | 2.207679  |
| 19 | 6 | 0 | -13.720012 | 5.315941  | 2.421451  |
| 20 | 1 | 0 | -13.606178 | 9.086425  | -1.741827 |
| 21 | 1 | 0 | -13.691451 | 7.680956  | -0.601638 |
| 22 | 1 | 0 | -15.047825 | 8.885033  | -0.663435 |
| 23 | 1 | 0 | -13.412957 | 11.351393 | -0.928549 |
| 24 | 1 | 0 | -14.648526 | 11.261873 | 0.395283  |
| 25 | 1 | 0 | -12.932667 | 11.706659 | 0.779868  |
| 26 | 6 | 0 | -14.460794 | 4.476261  | 1.361876  |
| 27 | 6 | 0 | -14.122927 | 4.894538  | 3.849941  |
| 28 | 1 | 0 | -12.640308 | 5.221197  | 2.291797  |
| 29 | 8 | 0 | -15.671910 | 4.620736  | 1.174068  |

|    |   |   |            |           |           |
|----|---|---|------------|-----------|-----------|
| 30 | 7 | 0 | -13.678207 | 3.579041  | 0.698079  |
| 31 | 6 | 0 | -13.611839 | 3.493929  | 4.232016  |
| 32 | 1 | 0 | -13.706112 | 5.636489  | 4.542788  |
| 33 | 1 | 0 | -15.213035 | 4.922819  | 3.954601  |
| 34 | 1 | 0 | -12.664371 | 3.619591  | 0.817968  |
| 35 | 6 | 0 | -14.209518 | 2.731407  | -0.378001 |
| 36 | 6 | 0 | -14.035404 | 3.129835  | 5.657330  |
| 37 | 1 | 0 | -14.052706 | 2.740676  | 3.567084  |
| 38 | 1 | 0 | -12.522946 | 3.435625  | 4.122755  |
| 39 | 6 | 0 | -13.645663 | 1.308883  | -0.147211 |
| 40 | 6 | 0 | -13.829086 | 3.188575  | -1.786760 |
| 41 | 1 | 0 | -15.301851 | 2.753680  | -0.284758 |
| 42 | 8 | 0 | -15.216099 | 3.148123  | 6.010785  |
| 43 | 7 | 0 | -13.015687 | 2.774494  | 6.493053  |
| 44 | 8 | 0 | -12.425702 | 1.140327  | -0.006019 |
| 45 | 7 | 0 | -14.551783 | 0.304671  | -0.097780 |
| 46 | 6 | 0 | -14.528370 | 4.496285  | -2.137613 |
| 47 | 6 | 0 | -14.181282 | 2.113340  | -2.795666 |
| 48 | 1 | 0 | -12.711937 | 3.350940  | -1.820329 |
| 49 | 1 | 0 | -13.260981 | 2.571585  | 7.452634  |
| 50 | 1 | 0 | -12.035137 | 2.847022  | 6.229452  |
| 51 | 1 | 0 | -15.534910 | 0.505370  | -0.240346 |
| 52 | 6 | 0 | -14.181499 | -1.111827 | 0.093092  |
| 53 | 6 | 0 | -13.810994 | 5.241572  | -3.234293 |
| 54 | 1 | 0 | -15.582535 | 4.277133  | -2.454656 |
| 55 | 1 | 0 | -14.593065 | 5.155181  | -1.230487 |
| 56 | 1 | 0 | -14.039193 | 2.499833  | -3.834089 |
| 57 | 1 | 0 | -13.521662 | 1.220948  | -2.661736 |
| 58 | 1 | 0 | -15.245495 | 1.792475  | -2.685014 |
| 59 | 6 | 0 | -14.816321 | -1.896841 | -1.086743 |
| 60 | 6 | 0 | -14.680860 | -1.710271 | 1.405078  |
| 61 | 1 | 0 | -13.089077 | -1.161679 | 0.063044  |
| 62 | 1 | 0 | -14.329179 | 6.209073  | -3.441843 |
| 63 | 1 | 0 | -12.756242 | 5.462423  | -2.938125 |
| 64 | 1 | 0 | -13.791410 | 4.644746  | -4.178064 |
| 65 | 8 | 0 | -16.038036 | -1.894506 | -1.253228 |
| 66 | 7 | 0 | -13.918608 | -2.518859 | -1.900646 |
| 67 | 6 | 0 | -14.366140 | -3.194965 | 1.422472  |
| 68 | 6 | 0 | -14.048446 | -1.021032 | 2.607594  |
| 69 | 1 | 0 | -15.800207 | -1.581525 | 1.457865  |
| 70 | 1 | 0 | -12.929784 | -2.504838 | -1.645669 |
| 71 | 6 | 0 | -14.326171 | -3.281835 | -3.067156 |
| 72 | 1 | 0 | -14.628067 | -3.630187 | 2.416505  |

|     |   |   |            |            |           |
|-----|---|---|------------|------------|-----------|
| 73  | 1 | 0 | -14.956538 | -3.727920  | 0.637859  |
| 74  | 1 | 0 | -13.278905 | -3.368745  | 1.231104  |
| 75  | 1 | 0 | -13.003075 | -1.407444  | 2.747125  |
| 76  | 1 | 0 | -13.964534 | 0.082880   | 2.424058  |
| 77  | 6 | 0 | -13.931243 | -4.759978  | -2.913259 |
| 78  | 6 | 0 | -13.645534 | -2.777955  | -4.362286 |
| 79  | 1 | 0 | -15.409895 | -3.167074  | -3.161242 |
| 80  | 8 | 0 | -12.848494 | -5.088872  | -2.404834 |
| 81  | 7 | 0 | -14.815378 | -5.648465  | -3.429436 |
| 82  | 1 | 0 | -12.558354 | -2.845128  | -4.265336 |
| 83  | 1 | 0 | -13.958375 | -3.419742  | -5.195492 |
| 84  | 1 | 0 | -15.621554 | -5.296184  | -3.934692 |
| 85  | 6 | 0 | -14.479472 | -7.059423  | -3.661740 |
| 86  | 6 | 0 | -14.390822 | -7.294668  | -5.194508 |
| 87  | 6 | 0 | -15.467398 | -8.039201  | -3.060755 |
| 88  | 1 | 0 | -13.500762 | -7.230912  | -3.196908 |
| 89  | 8 | 0 | -15.205202 | -6.777084  | -5.964880 |
| 90  | 7 | 0 | -13.378729 | -8.117097  | -5.573058 |
| 91  | 6 | 0 | -16.904526 | -7.798061  | -3.471603 |
| 92  | 1 | 0 | -15.152719 | -9.071372  | -3.374318 |
| 93  | 1 | 0 | -15.389903 | -7.993177  | -1.940232 |
| 94  | 1 | 0 | -12.661080 | -8.346482  | -4.885914 |
| 95  | 6 | 0 | -13.144558 | -8.451107  | -6.969210 |
| 96  | 6 | 0 | -17.785780 | -8.957104  | -3.056970 |
| 97  | 1 | 0 | -17.283284 | -6.854410  | -2.996915 |
| 98  | 1 | 0 | -16.960038 | -7.655414  | -4.584919 |
| 99  | 1 | 0 | -12.945689 | -9.524217  | -7.076322 |
| 100 | 1 | 0 | -14.037590 | -8.189144  | -7.540649 |
| 101 | 1 | 0 | -12.292432 | -7.892560  | -7.380102 |
| 102 | 6 | 0 | -19.232560 | -8.688272  | -3.468412 |
| 103 | 1 | 0 | -17.423694 | -9.902612  | -3.539074 |
| 104 | 1 | 0 | -17.721342 | -9.101523  | -1.946622 |
| 105 | 7 | 0 | -20.135334 | -9.761265  | -3.122773 |
| 106 | 1 | 0 | -19.545481 | -7.699251  | -3.016337 |
| 107 | 1 | 0 | -19.272586 | -8.564499  | -4.588759 |
| 108 | 1 | 0 | -20.048262 | -10.007032 | -2.156795 |
| 109 | 1 | 0 | -21.080444 | -9.490244  | -3.307533 |
| 110 | 8 | 0 | -10.309005 | 10.561386  | 3.110945  |
| 111 | 6 | 0 | -9.067929  | 10.554371  | 3.095630  |
| 112 | 7 | 0 | -8.325433  | 9.776731   | 2.265849  |
| 113 | 6 | 0 | -8.270004  | 11.429967  | 4.050959  |
| 114 | 6 | 0 | -8.932969  | 8.861967   | 1.288357  |
| 115 | 1 | 0 | -7.308045  | 9.874226   | 2.273225  |

|     |   |   |            |           |           |
|-----|---|---|------------|-----------|-----------|
| 116 | 1 | 0 | -8.609494  | 12.464665 | 3.936904  |
| 117 | 1 | 0 | -8.501039  | 11.119449 | 5.075899  |
| 118 | 1 | 0 | -7.192605  | 11.368371 | 3.879423  |
| 119 | 6 | 0 | -8.343862  | 7.452472  | 1.539949  |
| 120 | 6 | 0 | -8.672167  | 9.238806  | -0.168678 |
| 121 | 1 | 0 | -10.013030 | 8.863649  | 1.470781  |
| 122 | 7 | 0 | -9.240265  | 6.484398  | 1.822947  |
| 123 | 8 | 0 | -7.114543  | 7.272461  | 1.491603  |
| 124 | 6 | 0 | -9.361925  | 8.245316  | -1.083779 |
| 125 | 6 | 0 | -9.159366  | 10.641269 | -0.469144 |
| 126 | 1 | 0 | -7.560001  | 9.191802  | -0.359021 |
| 127 | 1 | 0 | -10.237827 | 6.721192  | 1.850270  |
| 128 | 6 | 0 | -8.844454  | 5.108599  | 2.122879  |
| 129 | 1 | 0 | -9.231340  | 8.552853  | -2.149180 |
| 130 | 1 | 0 | -8.927043  | 7.223950  | -0.956676 |
| 131 | 1 | 0 | -10.455586 | 8.197168  | -0.857988 |
| 132 | 1 | 0 | -9.071582  | 10.849890 | -1.563003 |
| 133 | 1 | 0 | -10.230073 | 10.756730 | -0.170127 |
| 134 | 1 | 0 | -8.552999  | 11.400101 | 0.080645  |
| 135 | 6 | 0 | -9.607096  | 4.163815  | 1.174109  |
| 136 | 6 | 0 | -9.151528  | 4.760199  | 3.592763  |
| 137 | 1 | 0 | -7.771518  | 5.034031  | 1.936215  |
| 138 | 8 | 0 | -10.844214 | 4.107258  | 1.205320  |
| 139 | 7 | 0 | -8.831151  | 3.423588  | 0.346873  |
| 140 | 6 | 0 | -8.662022  | 3.353117  | 3.984948  |
| 141 | 1 | 0 | -8.663071  | 5.512215  | 4.224608  |
| 142 | 1 | 0 | -10.230058 | 4.832057  | 3.766396  |
| 143 | 1 | 0 | -7.815913  | 3.537657  | 0.383127  |
| 144 | 6 | 0 | -9.399276  | 2.484079  | -0.633663 |
| 145 | 6 | 0 | -9.032319  | 3.027028  | 5.428497  |
| 146 | 1 | 0 | -9.155219  | 2.599497  | 3.357903  |
| 147 | 1 | 0 | -7.580733  | 3.263421  | 3.835087  |
| 148 | 6 | 0 | -8.833122  | 1.080047  | -0.298429 |
| 149 | 6 | 0 | -9.058923  | 2.811674  | -2.086620 |
| 150 | 1 | 0 | -10.486574 | 2.500979  | -0.503825 |
| 151 | 8 | 0 | -10.212213 | 2.982984  | 5.800754  |
| 152 | 7 | 0 | -7.992513  | 2.789477  | 6.266731  |
| 153 | 8 | 0 | -7.605467  | 0.885749  | -0.314637 |
| 154 | 7 | 0 | -9.751545  | 0.144678  | 0.021520  |
| 155 | 6 | 0 | -9.546272  | 4.202085  | -2.472917 |
| 156 | 6 | 0 | -9.680711  | 1.764084  | -2.991149 |
| 157 | 1 | 0 | -7.937015  | 2.774151  | -2.207568 |
| 158 | 1 | 0 | -8.210114  | 2.593559  | 7.234667  |

|     |   |   |            |           |           |
|-----|---|---|------------|-----------|-----------|
| 159 | 1 | 0 | -7.019750  | 2.849652  | 5.965802  |
| 160 | 1 | 0 | -10.743804 | 0.400573  | 0.029254  |
| 161 | 6 | 0 | -9.384297  | -1.234910 | 0.385661  |
| 162 | 6 | 0 | -8.985098  | 4.656729  | -3.796766 |
| 163 | 1 | 0 | -10.668692 | 4.202081  | -2.516252 |
| 164 | 1 | 0 | -9.246734  | 4.946573  | -1.687994 |
| 165 | 1 | 0 | -9.445000  | 1.988673  | -4.059185 |
| 166 | 1 | 0 | -9.281722  | 0.747559  | -2.753947 |
| 167 | 1 | 0 | -10.791627 | 1.746137  | -2.867975 |
| 168 | 6 | 0 | -10.013972 | -2.175970 | -0.675485 |
| 169 | 6 | 0 | -9.886853  | -1.668506 | 1.760959  |
| 170 | 1 | 0 | -8.291788  | -1.300093 | 0.359854  |
| 171 | 1 | 0 | -9.271162  | 5.719800  | -3.987168 |
| 172 | 1 | 0 | -7.869824  | 4.586069  | -3.798595 |
| 173 | 1 | 0 | -9.377679  | 4.035382  | -4.637349 |
| 174 | 8 | 0 | -11.240916 | -2.201266 | -0.836333 |
| 175 | 7 | 0 | -9.137874  | -2.914936 | -1.397780 |
| 176 | 6 | 0 | -9.508515  | -3.120278 | 1.989752  |
| 177 | 6 | 0 | -9.318868  | -0.789473 | 2.866789  |
| 178 | 1 | 0 | -11.013030 | -1.583743 | 1.772649  |
| 179 | 1 | 0 | -8.140888  | -2.861845 | -1.173507 |
| 180 | 6 | 0 | -9.574693  | -3.833489 | -2.443604 |
| 181 | 1 | 0 | -9.802096  | -3.435958 | 3.019412  |
| 182 | 1 | 0 | -10.034596 | -3.781065 | 1.258409  |
| 183 | 1 | 0 | -8.406403  | -3.262650 | 1.872402  |
| 184 | 1 | 0 | -8.226985  | -1.017944 | 2.995900  |
| 185 | 1 | 0 | -9.397976  | 0.291922  | 2.576691  |
| 186 | 6 | 0 | -9.169784  | -5.270117 | -2.064550 |
| 187 | 6 | 0 | -8.932527  | -3.488612 | -3.804752 |
| 188 | 1 | 0 | -10.660520 | -3.750855 | -2.513330 |
| 189 | 8 | 0 | -7.981275  | -5.547857 | -1.828372 |
| 190 | 7 | 0 | -10.178595 | -6.170512 | -2.039719 |
| 191 | 1 | 0 | -7.848341  | -3.616864 | -3.754571 |
| 192 | 1 | 0 | -9.326420  | -4.179505 | -4.561075 |
| 193 | 1 | 0 | -11.142447 | -5.855207 | -2.185916 |
| 194 | 6 | 0 | -9.932650  | -7.581374 | -1.713424 |
| 195 | 6 | 0 | -10.238680 | -8.478178 | -2.939603 |
| 196 | 6 | 0 | -10.689141 | -8.083460 | -0.500577 |
| 197 | 1 | 0 | -8.861887  | -7.653108 | -1.484926 |
| 198 | 8 | 0 | -11.317435 | -8.420919 | -3.549395 |
| 199 | 7 | 0 | -9.244485  | -9.328209 | -3.274846 |
| 200 | 6 | 0 | -12.196522 | -7.998533 | -0.601235 |
| 201 | 1 | 0 | -10.387323 | -9.153595 | -0.333347 |

|     |   |   |            |            |           |
|-----|---|---|------------|------------|-----------|
| 202 | 1 | 0 | -10.348917 | -7.499812  | 0.399230  |
| 203 | 1 | 0 | -8.339976  | -9.254789  | -2.807927 |
| 204 | 6 | 0 | -9.378171  | -10.248499 | -4.394474 |
| 205 | 6 | 0 | -12.834433 | -8.511221  | 0.673572  |
| 206 | 1 | 0 | -12.518720 | -6.937842  | -0.785510 |
| 207 | 1 | 0 | -12.549649 | -8.602361  | -1.480238 |
| 208 | 1 | 0 | -8.572628  | -10.986148 | -4.341275 |
| 209 | 1 | 0 | -10.343000 | -10.763386 | -4.348877 |
| 210 | 1 | 0 | -9.318232  | -9.726506  | -5.358753 |
| 211 | 6 | 0 | -14.356518 | -8.505567  | 0.547661  |
| 212 | 1 | 0 | -12.477284 | -9.552561  | 0.887691  |
| 213 | 1 | 0 | -12.517570 | -7.865881  | 1.534861  |
| 214 | 7 | 0 | -15.032615 | -8.942950  | 1.746829  |
| 215 | 1 | 0 | -14.676589 | -7.469324  | 0.224555  |
| 216 | 1 | 0 | -14.652009 | -9.215448  | -0.278244 |
| 217 | 1 | 0 | -14.707623 | -8.437780  | 2.547067  |
| 218 | 1 | 0 | -16.019781 | -8.808527  | 1.654796  |
| 219 | 8 | 0 | -6.454005  | -2.534205  | -0.526758 |
| 220 | 6 | 0 | -5.223153  | -2.457616  | -0.416967 |
| 221 | 6 | 0 | -4.586106  | -1.368203  | 0.482727  |
| 222 | 7 | 0 | -4.351150  | -3.259717  | -1.072025 |
| 223 | 7 | 0 | -4.946631  | -0.059812  | -0.092318 |
| 224 | 6 | 0 | -5.084064  | -1.575717  | 1.912201  |
| 225 | 1 | 0 | -3.494052  | -1.441937  | 0.462803  |
| 226 | 1 | 0 | -3.350609  | -3.166607  | -0.877634 |
| 227 | 6 | 0 | -4.790495  | -4.328146  | -1.964169 |
| 228 | 6 | 0 | -4.016747  | 0.837171   | -0.480935 |
| 229 | 1 | 0 | -5.939888  | 0.195001   | -0.137558 |
| 230 | 6 | 0 | -4.648459  | -2.945931  | 2.395614  |
| 231 | 6 | 0 | -4.564334  | -0.490427  | 2.844739  |
| 232 | 1 | 0 | -6.213040  | -1.537498  | 1.906032  |
| 233 | 6 | 0 | -4.352594  | -5.681156  | -1.376973 |
| 234 | 6 | 0 | -4.159849  | -4.186758  | -3.366790 |
| 235 | 1 | 0 | -5.878080  | -4.274713  | -2.033537 |
| 236 | 6 | 0 | -4.565873  | 2.203406   | -0.965597 |
| 237 | 8 | 0 | -2.789691  | 0.642429   | -0.441284 |
| 238 | 1 | 0 | -4.995589  | -3.108288  | 3.444265  |
| 239 | 1 | 0 | -5.088308  | -3.745955  | 1.751811  |
| 240 | 1 | 0 | -3.535109  | -3.037205  | 2.368895  |
| 241 | 1 | 0 | -3.450739  | -0.592922  | 2.946797  |
| 242 | 1 | 0 | -4.765570  | 0.519042   | 2.396952  |
| 243 | 8 | 0 | -3.156056  | -5.882407  | -1.105108 |
| 244 | 7 | 0 | -5.328664  | -6.602954  | -1.212711 |

|     |   |   |           |            |           |
|-----|---|---|-----------|------------|-----------|
| 245 | 1 | 0 | -3.074374 | -4.297973  | -3.306401 |
| 246 | 1 | 0 | -4.554339 | -4.984996  | -4.008135 |
| 247 | 7 | 0 | -4.006469 | 3.225230   | -0.064028 |
| 248 | 6 | 0 | -4.190153 | 2.394859   | -2.433108 |
| 249 | 1 | 0 | -5.655943 | 2.237803   | -0.863242 |
| 250 | 1 | 0 | -6.303251 | -6.350015  | -1.403279 |
| 251 | 6 | 0 | -5.009190 | -7.923342  | -0.656575 |
| 252 | 6 | 0 | -4.783493 | 4.015998   | 0.711721  |
| 253 | 1 | 0 | -2.990333 | 3.331676   | -0.020458 |
| 254 | 6 | 0 | -4.746843 | 3.704688   | -2.975754 |
| 255 | 6 | 0 | -4.713832 | 1.220678   | -3.238635 |
| 256 | 1 | 0 | -3.064481 | 2.414189   | -2.516837 |
| 257 | 6 | 0 | -5.523344 | -9.048966  | -1.581062 |
| 258 | 6 | 0 | -5.498942 | -8.157524  | 0.757693  |
| 259 | 1 | 0 | -3.914865 | -7.973955  | -0.623182 |
| 260 | 6 | 0 | -4.023097 | 5.013315   | 1.608609  |
| 261 | 8 | 0 | -6.021359 | 3.967442   | 0.736081  |
| 262 | 6 | 0 | -4.121676 | 4.088315   | -4.293159 |
| 263 | 1 | 0 | -5.859757 | 3.610627   | -3.095957 |
| 264 | 1 | 0 | -4.564368 | 4.533386   | -2.240811 |
| 265 | 1 | 0 | -4.501290 | 1.371922   | -4.324150 |
| 266 | 1 | 0 | -4.220147 | 0.271656   | -2.914825 |
| 267 | 1 | 0 | -5.817668 | 1.111250   | -3.103354 |
| 268 | 8 | 0 | -6.681200 | -9.073251  | -2.023718 |
| 269 | 7 | 0 | -4.608806 | -10.009745 | -1.837958 |
| 270 | 6 | 0 | -6.989655 | -8.003402  | 0.960852  |
| 271 | 1 | 0 | -5.187368 | -9.196156  | 1.056011  |
| 272 | 1 | 0 | -4.959399 | -7.442724  | 1.439656  |
| 273 | 6 | 0 | -4.302644 | 4.726930   | 3.098337  |
| 274 | 7 | 0 | -4.444536 | 6.367671   | 1.257890  |
| 275 | 1 | 0 | -2.951929 | 4.946637   | 1.408968  |
| 276 | 1 | 0 | -4.490420 | 5.093411   | -4.612325 |
| 277 | 1 | 0 | -3.008579 | 4.132998   | -4.204201 |
| 278 | 1 | 0 | -4.379979 | 3.352965   | -5.092764 |
| 279 | 1 | 0 | -3.653199 | -9.883356  | -1.502992 |
| 280 | 6 | 0 | -4.928361 | -11.172740 | -2.652651 |
| 281 | 6 | 0 | -7.351959 | -8.345537  | 2.391760  |
| 282 | 1 | 0 | -7.306366 | -6.952267  | 0.727060  |
| 283 | 1 | 0 | -7.541030 | -8.676074  | 0.249764  |
| 284 | 6 | 0 | -3.756230 | 3.360864   | 3.556397  |
| 285 | 1 | 0 | -3.836007 | 5.527215   | 3.685634  |
| 286 | 1 | 0 | -5.381468 | 4.770559   | 3.280307  |
| 287 | 6 | 0 | -3.575666 | 7.311299   | 0.838837  |



|     |   |   |            |            |           |
|-----|---|---|------------|------------|-----------|
| 288 | 1 | 0 | -5.438044  | 6.607497   | 1.353729  |
| 289 | 1 | 0 | -4.154144  | -11.931044 | -2.505916 |
| 290 | 1 | 0 | -5.897286  | -11.586670 | -2.356008 |
| 291 | 1 | 0 | -4.978424  | -10.919413 | -3.719800 |
| 292 | 6 | 0 | -8.851068  | -8.169764  | 2.622407  |
| 293 | 1 | 0 | -7.055449  | -9.404231  | 2.614929  |
| 294 | 1 | 0 | -6.773687  | -7.685749  | 3.092384  |
| 295 | 6 | 0 | -4.105219  | 3.092706   | 5.016540  |
| 296 | 1 | 0 | -4.221553  | 2.557989   | 2.971026  |
| 297 | 1 | 0 | -2.672935  | 3.308733   | 3.403980  |
| 298 | 6 | 0 | -4.190624  | 8.700310   | 0.541191  |
| 299 | 8 | 0 | -2.353094  | 7.126213   | 0.707223  |
| 300 | 7 | 0 | -9.263627  | -8.503109  | 3.964916  |
| 301 | 1 | 0 | -9.127144  | -7.110279  | 2.334554  |
| 302 | 1 | 0 | -9.406715  | -8.856467  | 1.919358  |
| 303 | 7 | 0 | -3.058394  | 3.010020   | 5.872174  |
| 304 | 8 | 0 | -5.281295  | 2.964007   | 5.387126  |
| 305 | 7 | 0 | -3.534760  | 9.674560   | 1.425368  |
| 306 | 6 | 0 | -4.020763  | 8.993777   | -0.947462 |
| 307 | 1 | 0 | -5.257518  | 8.706064   | 0.790444  |
| 308 | 1 | 0 | -8.751923  | -7.973309  | 4.641529  |
| 309 | 1 | 0 | -10.241772 | -8.329300  | 4.081313  |
| 310 | 1 | 0 | -2.089729  | 3.118289   | 5.569159  |
| 311 | 1 | 0 | -3.265582  | 2.857592   | 6.850272  |
| 312 | 6 | 0 | -4.228832  | 10.438774  | 2.307147  |
| 313 | 1 | 0 | -2.524105  | 9.802985   | 1.343967  |
| 314 | 6 | 0 | -4.751583  | 7.943571   | -1.762111 |
| 315 | 6 | 0 | -4.542738  | 10.371559  | -1.299383 |
| 316 | 1 | 0 | -2.921254  | 8.944836   | -1.200461 |
| 317 | 6 | 0 | -3.384319  | 11.374557  | 3.159591  |
| 318 | 8 | 0 | -5.461757  | 10.389912  | 2.443343  |
| 319 | 1 | 0 | -4.669817  | 8.180583   | -2.850189 |
| 320 | 1 | 0 | -4.311595  | 6.931393   | -1.588222 |
| 321 | 1 | 0 | -5.833875  | 7.914383   | -1.484770 |
| 322 | 1 | 0 | -4.509657  | 10.520625  | -2.405970 |
| 323 | 1 | 0 | -5.600079  | 10.488246  | -0.957165 |
| 324 | 1 | 0 | -3.923566  | 11.167546  | -0.821269 |
| 325 | 1 | 0 | -3.789678  | 12.387348  | 3.067067  |
| 326 | 1 | 0 | -3.488109  | 11.073219  | 4.207833  |
| 327 | 1 | 0 | -2.328872  | 11.365453  | 2.876488  |
| 328 | 1 | 0 | 17.572334  | 4.468247   | 3.036749  |
| 329 | 7 | 0 | 16.647261  | 4.442298   | 3.439024  |
| 330 | 6 | 0 | 15.544925  | 4.136793   | 2.697060  |

|     |   |   |           |           |           |
|-----|---|---|-----------|-----------|-----------|
| 331 | 1 | 0 | 16.524871 | 4.700577  | 4.409569  |
| 332 | 6 | 0 | 15.789166 | 3.795424  | 1.231432  |
| 333 | 8 | 0 | 14.412472 | 4.136208  | 3.185697  |
| 334 | 6 | 0 | 15.075262 | 4.799540  | 0.305579  |
| 335 | 1 | 0 | 15.387720 | 2.785594  | 1.079893  |
| 336 | 1 | 0 | 16.862229 | 3.760378  | 1.005599  |
| 337 | 6 | 0 | 15.174772 | 4.430576  | -1.191138 |
| 338 | 1 | 0 | 15.513594 | 5.796645  | 0.429835  |
| 339 | 1 | 0 | 14.019578 | 4.865098  | 0.587427  |
| 340 | 7 | 0 | 14.591444 | 5.471269  | -2.024910 |
| 341 | 6 | 0 | 14.422906 | 3.119564  | -1.472491 |
| 342 | 1 | 0 | 16.228129 | 4.350889  | -1.479606 |
| 343 | 6 | 0 | 15.367054 | 6.318509  | -2.750961 |
| 344 | 1 | 0 | 13.574991 | 5.606624  | -2.013985 |
| 345 | 8 | 0 | 13.191470 | 3.076910  | -1.368504 |
| 346 | 7 | 0 | 15.183209 | 2.052985  | -1.818686 |
| 347 | 6 | 0 | 14.582843 | 7.352417  | -3.595532 |
| 348 | 8 | 0 | 16.603172 | 6.299249  | -2.753574 |
| 349 | 1 | 0 | 16.191348 | 2.144100  | -1.851262 |
| 350 | 6 | 0 | 14.623021 | 0.714796  | -2.083446 |
| 351 | 7 | 0 | 15.270966 | 8.639081  | -3.430182 |
| 352 | 6 | 0 | 14.503819 | 6.858630  | -5.038524 |
| 353 | 1 | 0 | 13.565025 | 7.472750  | -3.209852 |
| 354 | 6 | 0 | 15.222371 | -0.241826 | -1.016217 |
| 355 | 6 | 0 | 14.947261 | 0.185875  | -3.477906 |
| 356 | 1 | 0 | 13.536593 | 0.793264  | -1.968050 |
| 357 | 1 | 0 | 16.281289 | 8.615813  | -3.497071 |
| 358 | 6 | 0 | 14.643878 | 9.769982  | -3.011635 |
| 359 | 6 | 0 | 13.702319 | 5.571084  | -5.091639 |
| 360 | 6 | 0 | 13.867641 | 7.898763  | -5.938712 |
| 361 | 1 | 0 | 15.547471 | 6.651647  | -5.411021 |
| 362 | 8 | 0 | 16.442415 | -0.286952 | -0.825490 |
| 363 | 7 | 0 | 14.300837 | -0.977270 | -0.339038 |
| 364 | 6 | 0 | 14.278048 | 1.033307  | -4.553641 |
| 365 | 6 | 0 | 14.494526 | -1.258081 | -3.584548 |
| 366 | 1 | 0 | 16.064199 | 0.221873  | -3.630520 |
| 367 | 6 | 0 | 15.539401 | 10.982323 | -2.803558 |
| 368 | 8 | 0 | 13.423660 | 9.835461  | -2.809190 |
| 369 | 1 | 0 | 13.450063 | 5.321042  | -6.150393 |
| 370 | 1 | 0 | 14.288257 | 4.721741  | -4.664918 |
| 371 | 1 | 0 | 12.750863 | 5.675160  | -4.511732 |
| 372 | 1 | 0 | 13.711545 | 7.475148  | -6.960560 |
| 373 | 1 | 0 | 12.877711 | 8.217278  | -5.530162 |

|     |   |   |           |           |           |
|-----|---|---|-----------|-----------|-----------|
| 374 | 1 | 0 | 14.519634 | 8.799581  | -6.032881 |
| 375 | 1 | 0 | 13.302167 | -0.799461 | -0.490386 |
| 376 | 6 | 0 | 14.684001 | -1.891770 | 0.746501  |
| 377 | 6 | 0 | 14.912551 | 0.837591  | -5.907317 |
| 378 | 1 | 0 | 13.187046 | 0.770812  | -4.604237 |
| 379 | 1 | 0 | 14.339231 | 2.121207  | -4.284447 |
| 380 | 1 | 0 | 14.597374 | -1.617197 | -4.636798 |
| 381 | 1 | 0 | 15.119121 | -1.911654 | -2.928057 |
| 382 | 1 | 0 | 13.425309 | -1.360126 | -3.275381 |
| 383 | 1 | 0 | 15.199919 | 11.784109 | -3.466988 |
| 384 | 1 | 0 | 15.419406 | 11.332954 | -1.773690 |
| 385 | 1 | 0 | 16.597719 | 10.781428 | -2.995994 |
| 386 | 6 | 0 | 14.020871 | -3.252339 | 0.426919  |
| 387 | 6 | 0 | 14.233559 | -1.444337 | 2.135700  |
| 388 | 1 | 0 | 15.778437 | -1.958126 | 0.728305  |
| 389 | 1 | 0 | 14.405647 | 1.485514  | -6.663239 |
| 390 | 1 | 0 | 15.995528 | 1.109894  | -5.880245 |
| 391 | 1 | 0 | 14.826891 | -0.223664 | -6.243867 |
| 392 | 8 | 0 | 12.799803 | -3.331401 | 0.274195  |
| 393 | 7 | 0 | 14.859967 | -4.313583 | 0.273847  |
| 394 | 6 | 0 | 14.531464 | -2.534253 | 3.147094  |
| 395 | 6 | 0 | 14.916130 | -0.143589 | 2.539773  |
| 396 | 1 | 0 | 13.116119 | -1.278199 | 2.111155  |
| 397 | 1 | 0 | 15.829687 | -4.226501 | 0.558303  |
| 398 | 6 | 0 | 14.382997 | -5.666476 | -0.007846 |
| 399 | 1 | 0 | 14.300663 | -2.169406 | 4.177246  |
| 400 | 1 | 0 | 13.904465 | -3.437088 | 2.946578  |
| 401 | 1 | 0 | 15.608056 | -2.828943 | 3.110503  |
| 402 | 1 | 0 | 15.967685 | -0.362873 | 2.864568  |
| 403 | 1 | 0 | 14.984797 | 0.543659  | 1.654773  |
| 404 | 6 | 0 | 14.858847 | -6.591614 | 1.126576  |
| 405 | 6 | 0 | 14.980654 | -6.195207 | -1.333501 |
| 406 | 1 | 0 | 13.294364 | -5.630147 | -0.070184 |
| 407 | 8 | 0 | 16.050371 | -6.580282 | 1.457352  |
| 408 | 7 | 0 | 13.916975 | -7.406594 | 1.670141  |
| 409 | 1 | 0 | 16.064347 | -6.310666 | -1.222142 |
| 410 | 1 | 0 | 14.555448 | -7.183761 | -1.542765 |
| 411 | 1 | 0 | 12.929056 | -7.270465 | 1.434404  |
| 412 | 6 | 0 | 14.293077 | -8.323846 | 2.748423  |
| 413 | 6 | 0 | 13.592829 | -9.690815 | 2.570295  |
| 414 | 6 | 0 | 14.046098 | -7.811773 | 4.155945  |
| 415 | 1 | 0 | 15.378926 | -8.457085 | 2.649354  |
| 416 | 8 | 0 | 12.440686 | -9.804670 | 2.137042  |

|     |   |   |            |            |           |
|-----|---|---|------------|------------|-----------|
| 417 | 7 | 0 | 14.332970  | -10.757326 | 2.964638  |
| 418 | 6 | 0 | 12.604451  | -7.461056  | 4.453441  |
| 419 | 1 | 0 | 14.394094  | -8.601583  | 4.875676  |
| 420 | 1 | 0 | 14.687991  | -6.904844  | 4.325662  |
| 421 | 1 | 0 | 15.285182  | -10.600537 | 3.265254  |
| 422 | 6 | 0 | 13.812185  | -12.120765 | 2.954593  |
| 423 | 6 | 0 | 12.436323  | -7.138888  | 5.923748  |
| 424 | 1 | 0 | 12.287054  | -6.581545  | 3.832738  |
| 425 | 1 | 0 | 11.936501  | -8.318608  | 4.167514  |
| 426 | 1 | 0 | 14.500689  | -12.766747 | 3.504955  |
| 427 | 1 | 0 | 12.830850  | -12.152885 | 3.437973  |
| 428 | 1 | 0 | 13.709171  | -12.499844 | 1.931014  |
| 429 | 6 | 0 | 10.977838  | -6.809270  | 6.236779  |
| 430 | 1 | 0 | 12.766826  | -8.013386  | 6.543843  |
| 431 | 1 | 0 | 13.092259  | -6.270474  | 6.195026  |
| 432 | 7 | 0 | 10.744437  | -6.556844  | 7.637535  |
| 433 | 1 | 0 | 10.666182  | -5.941278  | 5.579674  |
| 434 | 1 | 0 | 10.333675  | -7.688639  | 5.939990  |
| 435 | 1 | 0 | 11.305194  | -5.798158  | 7.968533  |
| 436 | 1 | 0 | 9.778495   | -6.354912  | 7.800040  |
| 437 | 6 | 0 | -14.082936 | -1.351648  | -4.709843 |
| 438 | 6 | 0 | -9.289771  | -2.071841  | -4.254003 |
| 439 | 6 | 0 | -4.531092  | -2.855808  | -4.015849 |
| 440 | 6 | 0 | 14.627440  | -5.288500  | -2.508473 |
| 441 | 1 | 0 | 16.632420  | -4.866482  | -2.871074 |
| 442 | 1 | 0 | 15.489971  | -4.091875  | -3.931529 |
| 443 | 7 | 0 | 15.679981  | -4.746850  | -3.182908 |
| 444 | 8 | 0 | 13.459227  | -5.067943  | -2.833299 |
| 445 | 1 | 0 | -2.522843  | -2.390941  | -4.271928 |
| 446 | 1 | 0 | -3.694329  | -1.196939  | -4.837012 |
| 447 | 1 | 0 | -7.274090  | -1.599213  | -4.440688 |
| 448 | 1 | 0 | -8.430855  | -0.324116  | -4.831908 |
| 449 | 1 | 0 | -12.089367 | -0.742446  | -4.695552 |
| 450 | 1 | 0 | -13.291874 | 0.493446   | -5.062279 |
| 451 | 7 | 0 | -13.053388 | -0.471981  | -4.876853 |
| 452 | 7 | 0 | -8.235722  | -1.279046  | -4.559534 |
| 453 | 7 | 0 | -3.488785  | -2.100849  | -4.431056 |
| 454 | 8 | 0 | -15.267772 | -1.049255  | -4.843790 |
| 455 | 8 | 0 | -10.465321 | -1.694062  | -4.342182 |
| 456 | 8 | 0 | -5.712495  | -2.510022  | -4.154212 |
| 457 | 6 | 0 | -14.844653 | -1.240077  | 3.869151  |
| 458 | 1 | 0 | -15.877609 | -0.828805  | 3.760819  |
| 459 | 1 | 0 | -14.924286 | -2.327220  | 4.111325  |

|     |   |   |            |           |           |
|-----|---|---|------------|-----------|-----------|
| 460 | 1 | 0 | -14.350176 | -0.724099 | 4.727789  |
| 461 | 6 | 0 | -10.041378 | -0.982727 | 4.176406  |
| 462 | 1 | 0 | -9.678814  | -0.237758 | 4.926043  |
| 463 | 1 | 0 | -11.142180 | -0.840232 | 4.044926  |
| 464 | 1 | 0 | -9.866690  | -2.005641 | 4.588291  |
| 465 | 6 | 0 | -5.210015  | -0.538151 | 4.206716  |
| 466 | 1 | 0 | -6.319534  | -0.636064 | 4.116750  |
| 467 | 1 | 0 | -4.828681  | -1.400525 | 4.804370  |
| 468 | 1 | 0 | -4.988219  | 0.405730  | 4.766106  |
| 469 | 6 | 0 | 14.175702  | 0.565218  | 3.645779  |
| 470 | 1 | 0 | 13.091235  | 0.667755  | 3.395341  |
| 471 | 1 | 0 | 14.261270  | 0.006102  | 4.608405  |
| 472 | 1 | 0 | 14.595288  | 1.591739  | 3.792877  |
| 473 | 1 | 0 | 2.830238   | 3.484809  | 5.129260  |
| 474 | 7 | 0 | 1.867328   | 3.401166  | 5.457273  |
| 475 | 6 | 0 | 0.807929   | 3.385360  | 4.614003  |
| 476 | 1 | 0 | 1.676929   | 3.341255  | 6.448799  |
| 477 | 6 | 0 | 1.131719   | 3.511173  | 3.129351  |
| 478 | 8 | 0 | -0.361026  | 3.278101  | 5.013638  |
| 479 | 6 | 0 | 0.542199   | 4.807475  | 2.540401  |
| 480 | 1 | 0 | 0.682602   | 2.639370  | 2.636906  |
| 481 | 1 | 0 | 2.214055   | 3.471640  | 2.966790  |
| 482 | 6 | 0 | 0.786366   | 4.937098  | 1.023321  |
| 483 | 1 | 0 | 1.000461   | 5.676547  | 3.028085  |
| 484 | 1 | 0 | -0.533503  | 4.846222  | 2.741122  |
| 485 | 7 | 0 | 0.337606   | 6.240135  | 0.538942  |
| 486 | 6 | 0 | 0.025319   | 3.840249  | 0.253305  |
| 487 | 1 | 0 | 1.854408   | 4.864988  | 0.809705  |
| 488 | 6 | 0 | 1.185736   | 7.142776  | 0.002481  |
| 489 | 1 | 0 | -0.658369  | 6.474348  | 0.621673  |
| 490 | 8 | 0 | -1.210915  | 3.777501  | 0.310307  |
| 491 | 7 | 0 | 0.798706   | 2.985490  | -0.453761 |
| 492 | 6 | 0 | 0.545628   | 8.486368  | -0.423982 |
| 493 | 8 | 0 | 2.407293   | 6.955377  | -0.136641 |
| 494 | 1 | 0 | 1.814014   | 3.106600  | -0.439302 |
| 495 | 6 | 0 | 0.238055   | 1.870381  | -1.236088 |
| 496 | 7 | 0 | 1.215339   | 9.557873  | 0.326783  |
| 497 | 6 | 0 | 0.663403   | 8.617405  | -1.940427 |
| 498 | 1 | 0 | -0.512864  | 8.509177  | -0.141729 |
| 499 | 6 | 0 | 0.788278   | 0.565406  | -0.604958 |
| 500 | 6 | 0 | 0.610147   | 1.899238  | -2.716590 |
| 501 | 1 | 0 | -0.851820  | 1.914809  | -1.135222 |
| 502 | 1 | 0 | 2.219263   | 9.693775  | 0.192343  |

|     |   |   |           |           |           |
|-----|---|---|-----------|-----------|-----------|
| 503 | 6 | 0 | 0.540952  | 10.396203 | 1.155094  |
| 504 | 6 | 0 | -0.082714 | 7.478979  | -2.609906 |
| 505 | 6 | 0 | 0.114079  | 9.944509  | -2.421817 |
| 506 | 1 | 0 | 1.754306  | 8.549822  | -2.224029 |
| 507 | 8 | 0 | 2.015182  | 0.371778  | -0.551733 |
| 508 | 7 | 0 | -0.141196 | -0.277247 | -0.109977 |
| 509 | 6 | 0 | 0.067853  | 3.150184  | -3.395479 |
| 510 | 6 | 0 | 0.068630  | 0.651599  | -3.389033 |
| 511 | 1 | 0 | 1.735619  | 1.895366  | -2.804737 |
| 512 | 6 | 0 | 1.397712  | 11.430911 | 1.869536  |
| 513 | 8 | 0 | -0.683879 | 10.338325 | 1.348922  |
| 514 | 1 | 0 | -0.049560 | 7.601725  | -3.719209 |
| 515 | 1 | 0 | 0.380786  | 6.496037  | -2.350468 |
| 516 | 1 | 0 | -1.151991 | 7.465975  | -2.284805 |
| 517 | 1 | 0 | 0.109512  | 9.972733  | -3.538530 |
| 518 | 1 | 0 | -0.932926 | 10.088742 | -2.059076 |
| 519 | 1 | 0 | 0.738898  | 10.792894 | -2.053853 |
| 520 | 1 | 0 | -1.134152 | -0.027772 | -0.182700 |
| 521 | 6 | 0 | 0.216165  | -1.514515 | 0.605674  |
| 522 | 6 | 0 | 0.673568  | 3.369619  | -4.758752 |
| 523 | 1 | 0 | -1.048738 | 3.066666  | -3.485134 |
| 524 | 1 | 0 | 0.280672  | 4.052886  | -2.763003 |
| 525 | 1 | 0 | 0.287503  | 0.677062  | -4.483456 |
| 526 | 1 | 0 | 0.544622  | -0.263566 | -2.958826 |
| 527 | 1 | 0 | -1.037430 | 0.577135  | -3.248006 |
| 528 | 1 | 0 | 0.965710  | 12.420842 | 1.690839  |
| 529 | 1 | 0 | 1.343880  | 11.238306 | 2.946769  |
| 530 | 1 | 0 | 2.440745  | 11.412379 | 1.544084  |
| 531 | 6 | 0 | -0.424765 | -2.693423 | -0.169169 |
| 532 | 6 | 0 | -0.284912 | -1.561002 | 2.048365  |
| 533 | 1 | 0 | 1.308010  | -1.593694 | 0.596605  |
| 534 | 1 | 0 | 0.321784  | 4.342630  | -5.180233 |
| 535 | 1 | 0 | 1.789031  | 3.395222  | -4.696408 |
| 536 | 1 | 0 | 0.380595  | 2.557797  | -5.467208 |
| 537 | 8 | 0 | -1.654489 | -2.762124 | -0.292441 |
| 538 | 7 | 0 | 0.443713  | -3.583915 | -0.703903 |
| 539 | 6 | 0 | 0.120031  | -2.882299 | 2.673742  |
| 540 | 6 | 0 | 0.260240  | -0.396128 | 2.862963  |
| 541 | 1 | 0 | -1.412910 | -1.498677 | 2.036995  |
| 542 | 1 | 0 | 1.444048  | -3.474062 | -0.517523 |
| 543 | 6 | 0 | -0.000212 | -4.750772 | -1.460986 |
| 544 | 1 | 0 | -0.209341 | -2.916224 | 3.740013  |
| 545 | 1 | 0 | -0.357354 | -3.734281 | 2.131289  |

|     |   |   |           |            |           |
|-----|---|---|-----------|------------|-----------|
| 546 | 1 | 0 | 1.229282  | -3.011569  | 2.637615  |
| 547 | 1 | 0 | 1.367617  | -0.525074  | 2.997698  |
| 548 | 1 | 0 | 0.103920  | 0.562876   | 2.301052  |
| 549 | 6 | 0 | 0.446747  | -6.021202  | -0.717163 |
| 550 | 6 | 0 | 0.617750  | -4.774516  | -2.876320 |
| 551 | 1 | 0 | -1.088438 | -4.707699  | -1.526290 |
| 552 | 8 | 0 | 1.650845  | -6.200469  | -0.463969 |
| 553 | 7 | 0 | -0.531628 | -6.897033  | -0.392695 |
| 554 | 1 | 0 | 1.704587  | -4.868562  | -2.811841 |
| 555 | 1 | 0 | 0.225547  | -5.647405  | -3.413209 |
| 556 | 1 | 0 | -1.509093 | -6.657229  | -0.586459 |
| 557 | 6 | 0 | -0.204789 | -8.138093  | 0.319289  |
| 558 | 6 | 0 | -0.772994 | -9.368330  | -0.424061 |
| 559 | 6 | 0 | -0.620593 | -8.175704  | 1.775323  |
| 560 | 1 | 0 | 0.889127  | -8.205237  | 0.307069  |
| 561 | 8 | 0 | -1.949969 | -9.437094  | -0.810266 |
| 562 | 6 | 0 | -2.087488 | -7.928641  | 2.049248  |
| 563 | 1 | 0 | -0.331429 | -9.183615  | 2.182395  |
| 564 | 1 | 0 | -0.011786 | -7.409060  | 2.331800  |
| 565 | 6 | 0 | -0.238722 | -11.619491 | -1.237138 |
| 566 | 6 | 0 | -2.359297 | -8.072970  | 3.533561  |
| 567 | 1 | 0 | -2.378752 | -6.900528  | 1.706181  |
| 568 | 1 | 0 | -2.713429 | -8.656318  | 1.465192  |
| 569 | 1 | 0 | 0.573174  | -12.337310 | -1.092346 |
| 570 | 1 | 0 | -1.156591 | -12.024897 | -0.798380 |
| 571 | 1 | 0 | -0.406125 | -11.485499 | -2.313558 |
| 572 | 6 | 0 | -3.826728 | -7.792278  | 3.848358  |
| 573 | 1 | 0 | -2.093096 | -9.110251  | 3.868038  |
| 574 | 1 | 0 | -1.700783 | -7.363522  | 4.103412  |
| 575 | 7 | 0 | -4.136425 | -7.901199  | 5.253913  |
| 576 | 1 | 0 | -4.087860 | -6.774837  | 3.425745  |
| 577 | 1 | 0 | -4.465532 | -8.547906  | 3.303566  |
| 578 | 1 | 0 | -3.583682 | -7.268084  | 5.795819  |
| 579 | 1 | 0 | -5.105995 | -7.712240  | 5.411461  |
| 580 | 6 | 0 | 0.229044  | -3.535103  | -3.678341 |
| 581 | 1 | 0 | 2.230640  | -3.068852  | -3.980592 |
| 582 | 1 | 0 | 1.043068  | -1.969304  | -4.685170 |
| 583 | 7 | 0 | 1.260748  | -2.811524  | -4.168120 |
| 584 | 8 | 0 | -0.957395 | -3.231355  | -3.866195 |
| 585 | 6 | 0 | -0.408402 | -0.268890  | 4.208709  |
| 586 | 1 | 0 | -1.519167 | -0.338349  | 4.107810  |
| 587 | 1 | 0 | -0.068618 | -1.071793  | 4.905963  |
| 588 | 1 | 0 | -0.161942 | 0.723483   | 4.664384  |

|     |   |   |          |            |           |
|-----|---|---|----------|------------|-----------|
| 589 | 1 | 0 | 1.091596 | -10.210061 | -0.311807 |
| 590 | 7 | 0 | 0.123032 | -10.365739 | -0.592139 |
| 591 | 1 | 0 | 7.739365 | 3.852458   | 4.542322  |
| 592 | 7 | 0 | 6.786316 | 3.793085   | 4.900953  |
| 593 | 6 | 0 | 5.708518 | 3.666732   | 4.090771  |
| 594 | 1 | 0 | 6.619913 | 3.843833   | 5.897343  |
| 595 | 6 | 0 | 5.995960 | 3.627413   | 2.593696  |
| 596 | 8 | 0 | 4.550815 | 3.591183   | 4.528072  |
| 597 | 6 | 0 | 5.381006 | 4.847442   | 1.881203  |
| 598 | 1 | 0 | 5.542328 | 2.704117   | 2.211853  |
| 599 | 1 | 0 | 7.074413 | 3.576103   | 2.408855  |
| 600 | 6 | 0 | 5.584928 | 4.814291   | 0.352702  |
| 601 | 1 | 0 | 5.843052 | 5.767514   | 2.259400  |
| 602 | 1 | 0 | 4.310515 | 4.901136   | 2.104909  |
| 603 | 7 | 0 | 5.107671 | 6.052592   | -0.256785 |
| 604 | 6 | 0 | 4.820238 | 3.633119   | -0.274480 |
| 605 | 1 | 0 | 6.648176 | 4.730491   | 0.120220  |
| 606 | 6 | 0 | 5.933201 | 6.901304   | -0.904885 |
| 607 | 1 | 0 | 4.110980 | 6.285094   | -0.178059 |
| 608 | 8 | 0 | 3.585103 | 3.576387   | -0.196807 |
| 609 | 7 | 0 | 5.588221 | 2.700209   | -0.881523 |
| 610 | 6 | 0 | 5.266641 | 8.181379   | -1.462914 |
| 611 | 8 | 0 | 7.154525 | 6.712201   | -1.046509 |
| 612 | 1 | 0 | 6.601966 | 2.828904   | -0.902883 |
| 613 | 6 | 0 | 5.023293 | 1.496912   | -1.515818 |
| 614 | 7 | 0 | 5.941397 | 9.335520   | -0.853249 |
| 615 | 6 | 0 | 5.345636 | 8.141697   | -2.987172 |
| 616 | 1 | 0 | 4.214886 | 8.225392   | -1.158863 |
| 617 | 6 | 0 | 5.586670 | 0.278756   | -0.739250 |
| 618 | 6 | 0 | 5.377734 | 1.348728   | -2.993596 |
| 619 | 1 | 0 | 3.934630 | 1.549299   | -1.406260 |
| 620 | 1 | 0 | 6.943413 | 9.453420   | -1.013923 |
| 621 | 6 | 0 | 5.272730 | 10.271217  | -0.131211 |
| 622 | 6 | 0 | 4.599621 | 6.926611   | -3.504802 |
| 623 | 6 | 0 | 4.765834 | 9.399829   | -3.600038 |
| 624 | 1 | 0 | 6.430042 | 8.054978   | -3.289695 |
| 625 | 8 | 0 | 6.815110 | 0.097807   | -0.675180 |
| 626 | 7 | 0 | 4.665312 | -0.503302  | -0.140354 |
| 627 | 6 | 0 | 4.818200 | 2.505237   | -3.811748 |
| 628 | 6 | 0 | 4.837503 | 0.025842   | -3.503674 |
| 629 | 1 | 0 | 6.502097 | 1.340991   | -3.095247 |
| 630 | 6 | 0 | 6.132415 | 11.391965  | 0.434285  |
| 631 | 8 | 0 | 4.050189 | 10.236277  | 0.080231  |



|     |   |   |          |           |           |
|-----|---|---|----------|-----------|-----------|
| 632 | 1 | 0 | 4.597651 | 6.927553  | -4.621377 |
| 633 | 1 | 0 | 5.087531 | 5.984514  | -3.154551 |
| 634 | 1 | 0 | 3.540860 | 6.934555  | -3.146735 |
| 635 | 1 | 0 | 4.734572 | 9.302727  | -4.712443 |
| 636 | 1 | 0 | 3.725712 | 9.571493  | -3.229462 |
| 637 | 1 | 0 | 5.386632 | 10.291483 | -3.344878 |
| 638 | 1 | 0 | 3.670852 | -0.265963 | -0.232358 |
| 639 | 6 | 0 | 5.032272 | -1.650039 | 0.709522  |
| 640 | 6 | 0 | 5.412683 | 2.567585  | -5.196007 |
| 641 | 1 | 0 | 3.702072 | 2.400458  | -3.882588 |
| 642 | 1 | 0 | 5.024932 | 3.478738  | -3.292446 |
| 643 | 1 | 0 | 5.036190 | -0.076366 | -4.597479 |
| 644 | 1 | 0 | 5.330645 | -0.828338 | -2.977955 |
| 645 | 1 | 0 | 3.734982 | -0.040780 | -3.333730 |
| 646 | 1 | 0 | 5.721747 | 12.348100 | 0.093543  |
| 647 | 1 | 0 | 6.052580 | 11.371101 | 1.526544  |
| 648 | 1 | 0 | 7.180972 | 11.310664 | 0.137586  |
| 649 | 6 | 0 | 4.381637 | -2.911530 | 0.086337  |
| 650 | 6 | 0 | 4.549654 | -1.529661 | 2.154088  |
| 651 | 1 | 0 | 6.124089 | -1.729750 | 0.694954  |
| 652 | 1 | 0 | 5.041576 | 3.476228  | -5.729703 |
| 653 | 1 | 0 | 6.527813 | 2.619339  | -5.145701 |
| 654 | 1 | 0 | 5.130236 | 1.671015  | -5.798649 |
| 655 | 8 | 0 | 3.149995 | -3.001401 | 0.003116  |
| 656 | 7 | 0 | 5.244788 | -3.850425 | -0.368725 |
| 657 | 6 | 0 | 4.966476 | -2.768706 | 2.923519  |
| 658 | 6 | 0 | 5.100375 | -0.277315 | 2.821786  |
| 659 | 1 | 0 | 3.421376 | -1.471327 | 2.149618  |
| 660 | 1 | 0 | 6.247321 | -3.718075 | -0.213904 |
| 661 | 6 | 0 | 4.793968 | -5.096575 | -0.981813 |
| 662 | 1 | 0 | 4.643089 | -2.682483 | 3.988704  |
| 663 | 1 | 0 | 4.491660 | -3.679896 | 2.484979  |
| 664 | 1 | 0 | 6.076225 | -2.894885 | 2.895914  |
| 665 | 1 | 0 | 6.210328 | -0.385615 | 2.953415  |
| 666 | 1 | 0 | 4.930136 | 0.610564  | 2.156559  |
| 667 | 6 | 0 | 5.253070 | -6.273985 | -0.103558 |
| 668 | 6 | 0 | 5.395644 | -5.280186 | -2.391552 |
| 669 | 1 | 0 | 3.705090 | -5.061567 | -1.038408 |
| 670 | 8 | 0 | 6.462027 | -6.421717 | 0.149407  |
| 671 | 7 | 0 | 4.281860 | -7.106558 | 0.334314  |
| 672 | 1 | 0 | 6.482832 | -5.372421 | -2.329220 |
| 673 | 1 | 0 | 4.995917 | -6.206283 | -2.823790 |
| 674 | 1 | 0 | 3.301108 | -6.893118 | 0.125901  |

|     |   |   |           |            |           |
|-----|---|---|-----------|------------|-----------|
| 675 | 6 | 0 | 4.622035  | -8.259457  | 1.176911  |
| 676 | 6 | 0 | 4.018035  | -9.562271  | 0.603978  |
| 677 | 6 | 0 | 4.258514  | -8.121378  | 2.640957  |
| 678 | 1 | 0 | 5.713978  | -8.341697  | 1.136729  |
| 679 | 8 | 0 | 2.828037  | -9.664592  | 0.268456  |
| 680 | 7 | 0 | 4.901208  | -10.582159 | 0.525044  |
| 681 | 6 | 0 | 2.802656  | -7.836466  | 2.935420  |
| 682 | 1 | 0 | 4.560716  | -9.076129  | 3.153447  |
| 683 | 1 | 0 | 4.887715  | -7.298244  | 3.082205  |
| 684 | 1 | 0 | 5.878337  | -10.403872 | 0.756470  |
| 685 | 6 | 0 | 4.507951  | -11.900687 | 0.049279  |
| 686 | 6 | 0 | 2.582633  | -7.808793  | 4.434956  |
| 687 | 1 | 0 | 2.501308  | -6.852838  | 2.487151  |
| 688 | 1 | 0 | 2.156114  | -8.623151  | 2.460331  |
| 689 | 1 | 0 | 5.331592  | -12.598181 | 0.223533  |
| 690 | 1 | 0 | 3.621391  | -12.254361 | 0.586427  |
| 691 | 1 | 0 | 4.274528  | -11.888002 | -1.022882 |
| 692 | 6 | 0 | 1.121022  | -7.516317  | 4.765586  |
| 693 | 1 | 0 | 2.879622  | -8.795364  | 4.879317  |
| 694 | 1 | 0 | 3.245289  | -7.027096  | 4.894614  |
| 695 | 7 | 0 | 0.858108  | -7.477231  | 6.184013  |
| 696 | 1 | 0 | 0.828856  | -6.554199  | 4.244892  |
| 697 | 1 | 0 | 0.479517  | -8.335327  | 4.325492  |
| 698 | 1 | 0 | 1.396560  | -6.763840  | 6.632218  |
| 699 | 1 | 0 | -0.114309 | -7.315074  | 6.353273  |
| 700 | 6 | 0 | 5.003566  | -4.136733  | -3.324183 |
| 701 | 1 | 0 | 7.002782  | -3.750758  | -3.739233 |
| 702 | 1 | 0 | 5.812720  | -2.723276  | -4.538744 |
| 703 | 7 | 0 | 6.032160  | -3.501647  | -3.930444 |
| 704 | 8 | 0 | 3.818132  | -3.830698  | -3.511767 |
| 705 | 6 | 0 | 4.450534  | -0.000461  | 4.154263  |
| 706 | 1 | 0 | 3.339008  | -0.088115  | 4.078878  |
| 707 | 1 | 0 | 4.806725  | -0.716066  | 4.933571  |
| 708 | 1 | 0 | 4.695720  | 1.039135   | 4.489425  |
| 709 | 1 | 0 | 12.641352 | 4.146704   | 3.824303  |
| 710 | 7 | 0 | 11.694514 | 4.136622   | 4.197636  |
| 711 | 6 | 0 | 10.601702 | 3.934978   | 3.421365  |
| 712 | 1 | 0 | 11.546283 | 4.283554   | 5.187421  |
| 713 | 6 | 0 | 10.860813 | 3.736525   | 1.931638  |
| 714 | 8 | 0 | 9.452947  | 3.911679   | 3.884282  |
| 715 | 6 | 0 | 10.201970 | 4.853421   | 1.099136  |
| 716 | 1 | 0 | 10.423367 | 2.765379   | 1.667900  |
| 717 | 1 | 0 | 11.936229 | 3.685979   | 1.727877  |

|     |   |   |           |           |           |
|-----|---|---|-----------|-----------|-----------|
| 718 | 6 | 0 | 10.368486 | 4.647812  | -0.420975 |
| 719 | 1 | 0 | 10.651334 | 5.820243  | 1.356619  |
| 720 | 1 | 0 | 9.136454  | 4.911369  | 1.343783  |
| 721 | 7 | 0 | 9.854254  | 5.803009  | -1.153041 |
| 722 | 6 | 0 | 9.610000  | 3.388272  | -0.884400 |
| 723 | 1 | 0 | 11.427053 | 4.555141  | -0.670419 |
| 724 | 6 | 0 | 10.642410 | 6.568177  | -1.938132 |
| 725 | 1 | 0 | 8.860049  | 6.041652  | -1.058503 |
| 726 | 8 | 0 | 8.377635  | 3.330172  | -0.780496 |
| 727 | 7 | 0 | 10.378987 | 2.389913  | -1.378986 |
| 728 | 6 | 0 | 9.943669  | 7.775694  | -2.610876 |
| 729 | 8 | 0 | 11.855901 | 6.357337  | -2.119961 |
| 730 | 1 | 0 | 11.389367 | 2.524989  | -1.435381 |
| 731 | 6 | 0 | 9.813513  | 1.117670  | -1.863654 |
| 732 | 7 | 0 | 10.625034 | 9.003123  | -2.172027 |
| 733 | 6 | 0 | 9.958977  | 7.557062  | -4.121562 |
| 734 | 1 | 0 | 8.905159  | 7.849306  | -2.269125 |
| 735 | 6 | 0 | 10.392220 | -0.007816 | -0.966461 |
| 736 | 6 | 0 | 10.149149 | 0.803417  | -3.319463 |
| 737 | 1 | 0 | 8.726159  | 1.179883  | -1.746098 |
| 738 | 1 | 0 | 11.600211 | 9.147261  | -2.435385 |
| 739 | 6 | 0 | 9.970037  | 10.002007 | -1.520801 |
| 740 | 6 | 0 | 9.194268  | 6.291582  | -4.460618 |
| 741 | 6 | 0 | 9.353300  | 8.735850  | -4.855150 |
| 742 | 1 | 0 | 11.030118 | 7.430706  | -4.455808 |
| 743 | 8 | 0 | 11.622189 | -0.182663 | -0.905052 |
| 744 | 7 | 0 | 9.481015  | -0.722715 | -0.273968 |
| 745 | 6 | 0 | 9.587882  | 1.862989  | -4.258709 |
| 746 | 6 | 0 | 9.596533  | -0.564884 | -3.672940 |
| 747 | 1 | 0 | 11.272251 | 0.777182  | -3.430307 |
| 748 | 6 | 0 | 10.820025 | 11.206719 | -1.147209 |
| 749 | 8 | 0 | 8.767228  | 9.954241  | -1.223782 |
| 750 | 1 | 0 | 9.145003  | 6.161308  | -5.568480 |
| 751 | 1 | 0 | 9.699505  | 5.396116  | -4.023266 |
| 752 | 1 | 0 | 8.151623  | 6.344126  | -4.061318 |
| 753 | 1 | 0 | 9.269958  | 8.504468  | -5.944867 |
| 754 | 1 | 0 | 8.331865  | 8.959067  | -4.460940 |
| 755 | 1 | 0 | 9.987304  | 9.647159  | -4.740111 |
| 756 | 1 | 0 | 8.485188  | -0.488903 | -0.363800 |
| 757 | 6 | 0 | 9.864902  | -1.760686 | 0.699119  |
| 758 | 6 | 0 | 10.179152 | 1.768467  | -5.642713 |
| 759 | 1 | 0 | 8.471400  | 1.752717  | -4.313712 |
| 760 | 1 | 0 | 9.797279  | 2.888224  | -3.852612 |

|     |   |   |           |            |           |
|-----|---|---|-----------|------------|-----------|
| 761 | 1 | 0 | 9.775993  | -0.785512  | -4.752538 |
| 762 | 1 | 0 | 10.095952 | -1.359788  | -3.066470 |
| 763 | 1 | 0 | 8.496847  | -0.607371  | -3.478750 |
| 764 | 1 | 0 | 10.327269 | 12.106883  | -1.528255 |
| 765 | 1 | 0 | 10.845632 | 11.284774  | -0.054700 |
| 766 | 1 | 0 | 11.838529 | 11.145875  | -1.537516 |
| 767 | 6 | 0 | 9.201735  | -3.089070  | 0.250044  |
| 768 | 6 | 0 | 9.414493  | -1.466050  | 2.129383  |
| 769 | 1 | 0 | 10.956014 | -1.843342  | 0.669974  |
| 770 | 1 | 0 | 9.819044  | 2.619624   | -6.270356 |
| 771 | 1 | 0 | 11.295185 | 1.809301   | -5.599734 |
| 772 | 1 | 0 | 9.882597  | 0.816410   | -6.145188 |
| 773 | 8 | 0 | 7.969535  | -3.188799  | 0.209268  |
| 774 | 7 | 0 | 10.055602 | -4.079867  | -0.105758 |
| 775 | 6 | 0 | 9.886988  | -2.583352  | 3.040067  |
| 776 | 6 | 0 | 9.940802  | -0.122973  | 2.616105  |
| 777 | 1 | 0 | 8.285062  | -1.438539  | 2.148156  |
| 778 | 1 | 0 | 11.060224 | -3.924681  | -0.006614 |
| 779 | 6 | 0 | 9.594405  | -5.393887  | -0.544380 |
| 780 | 1 | 0 | 9.561208  | -2.383308  | 4.089170  |
| 781 | 1 | 0 | 9.453193  | -3.561235  | 2.718531  |
| 782 | 1 | 0 | 11.001413 | -2.662671  | 3.021573  |
| 783 | 1 | 0 | 11.059205 | -0.172909  | 2.703577  |
| 784 | 1 | 0 | 9.701246  | 0.672397   | 1.861090  |
| 785 | 6 | 0 | 10.066154 | -6.458432  | 0.463696  |
| 786 | 6 | 0 | 10.175299 | -5.763165  | -1.927345 |
| 787 | 1 | 0 | 8.504772  | -5.362599  | -0.588380 |
| 788 | 8 | 0 | 11.280294 | -6.579851  | 0.711122  |
| 789 | 7 | 0 | 9.102369  | -7.234077  | 1.007955  |
| 790 | 1 | 0 | 11.261069 | -5.870409  | -1.861321 |
| 791 | 1 | 0 | 9.753385  | -6.727658  | -2.236359 |
| 792 | 1 | 0 | 8.117554  | -7.045891  | 0.791657  |
| 793 | 6 | 0 | 9.456818  | -8.297258  | 1.956245  |
| 794 | 6 | 0 | 8.822481  | -9.644138  | 1.536235  |
| 795 | 6 | 0 | 9.137389  | -8.006415  | 3.408358  |
| 796 | 1 | 0 | 10.545699 | -8.396856  | 1.892519  |
| 797 | 8 | 0 | 7.625106  | -9.761281  | 1.236201  |
| 798 | 7 | 0 | 9.688477  | -10.682210 | 1.549889  |
| 799 | 6 | 0 | 7.693771  | -7.667478  | 3.705569  |
| 800 | 1 | 0 | 9.437190  | -8.910915  | 4.006279  |
| 801 | 1 | 0 | 9.791143  | -7.156208  | 3.751555  |
| 802 | 1 | 0 | 10.671867 | -10.495109 | 1.738563  |
| 803 | 6 | 0 | 9.268059  | -12.038200 | 1.225247  |

|     |   |   |           |            |           |
|-----|---|---|-----------|------------|-----------|
| 804 | 6 | 0 | 7.505469  | -7.494970  | 5.199456  |
| 805 | 1 | 0 | 7.399334  | -6.724615  | 3.173081  |
| 806 | 1 | 0 | 7.023966  | -8.483112  | 3.319510  |
| 807 | 1 | 0 | 10.063307 | -12.732744 | 1.509074  |
| 808 | 1 | 0 | 8.356807  | -12.295822 | 1.774630  |
| 809 | 1 | 0 | 9.064862  | -12.152167 | 0.152866  |
| 810 | 6 | 0 | 6.053107  | -7.155695  | 5.527063  |
| 811 | 1 | 0 | 7.801018  | -8.438268  | 5.730330  |
| 812 | 1 | 0 | 8.185179  | -6.681370  | 5.570010  |
| 813 | 7 | 0 | 5.819667  | -6.974401  | 6.939305  |
| 814 | 1 | 0 | 5.758733  | -6.246921  | 4.919065  |
| 815 | 1 | 0 | 5.396223  | -8.007304  | 5.181424  |
| 816 | 1 | 0 | 6.360113  | -6.215116  | 7.301200  |
| 817 | 1 | 0 | 4.849389  | -6.805155  | 7.113478  |
| 818 | 6 | 0 | 9.796147  | -4.738304  | -2.992657 |
| 819 | 1 | 0 | 11.799556 | -4.421875  | -3.444697 |
| 820 | 1 | 0 | 10.625856 | -3.490316  | -4.368718 |
| 821 | 7 | 0 | 10.833998 | -4.186052  | -3.664111 |
| 822 | 8 | 0 | 8.615568  | -4.447906  | -3.222957 |
| 823 | 6 | 0 | 9.341201  | 0.287210   | 3.937797  |
| 824 | 1 | 0 | 8.231957  | 0.151849   | 3.928318  |
| 825 | 1 | 0 | 9.761538  | -0.317439  | 4.776864  |
| 826 | 1 | 0 | 9.559111  | 1.367183   | 4.136269  |

P Pl (Ac-VQIINK-NHMe)<sub>8</sub>

|    |   |   |            |           |           |
|----|---|---|------------|-----------|-----------|
| 1  | 6 | 0 | -15.978635 | 10.869652 | 5.094796  |
| 2  | 6 | 0 | -16.632982 | 10.094045 | 3.958289  |
| 3  | 1 | 0 | -16.492842 | 11.830767 | 5.199254  |
| 4  | 1 | 0 | -16.131930 | 10.312382 | 6.025203  |
| 5  | 1 | 0 | -14.909229 | 11.033139 | 4.935789  |
| 6  | 8 | 0 | -17.842922 | 9.847224  | 3.947585  |
| 7  | 7 | 0 | -15.775115 | 9.698351  | 2.969406  |
| 8  | 1 | 0 | -14.776962 | 9.901378  | 3.044691  |
| 9  | 6 | 0 | -16.249646 | 8.901358  | 1.834477  |
| 10 | 6 | 0 | -15.699815 | 7.465060  | 2.007224  |
| 11 | 6 | 0 | -15.812658 | 9.422581  | 0.469459  |
| 12 | 1 | 0 | -17.345005 | 8.912327  | 1.895311  |
| 13 | 8 | 0 | -14.478368 | 7.252258  | 1.960572  |
| 14 | 7 | 0 | -16.614903 | 6.499356  | 2.248152  |
| 15 | 6 | 0 | -16.468919 | 8.600766  | -0.623429 |
| 16 | 6 | 0 | -16.158433 | 10.886656 | 0.294248  |
| 17 | 1 | 0 | -14.692183 | 9.303257  | 0.385549  |
| 18 | 1 | 0 | -17.600728 | 6.734622  | 2.245768  |
| 19 | 6 | 0 | -16.269298 | 5.093111  | 2.459079  |
| 20 | 1 | 0 | -16.113732 | 8.946927  | -1.623871 |
| 21 | 1 | 0 | -16.212376 | 7.518844  | -0.513307 |
| 22 | 1 | 0 | -17.579718 | 8.709786  | -0.586313 |
| 23 | 1 | 0 | -15.971402 | 11.197568 | -0.762359 |
| 24 | 1 | 0 | -17.234048 | 11.068734 | 0.532394  |
| 25 | 1 | 0 | -15.531965 | 11.524871 | 0.962522  |
| 26 | 6 | 0 | -16.975168 | 4.266676  | 1.365828  |
| 27 | 6 | 0 | -16.696475 | 4.635645  | 3.869180  |
| 28 | 1 | 0 | -15.185782 | 5.016897  | 2.350677  |
| 29 | 8 | 0 | -18.184256 | 4.398298  | 1.156161  |
| 30 | 7 | 0 | -16.166095 | 3.396437  | 0.697862  |
| 31 | 6 | 0 | -16.173913 | 3.234360  | 4.232824  |
| 32 | 1 | 0 | -16.305333 | 5.368345  | 4.586430  |
| 33 | 1 | 0 | -17.788885 | 4.646611  | 3.950532  |
| 34 | 1 | 0 | -15.155427 | 3.450007  | 0.838571  |
| 35 | 6 | 0 | -16.662724 | 2.570428  | -0.411306 |
| 36 | 6 | 0 | -16.623093 | 2.834123  | 5.640501  |
| 37 | 1 | 0 | -16.589574 | 2.489734  | 3.542438  |
| 38 | 1 | 0 | -15.082175 | 3.193278  | 4.146535  |
| 39 | 6 | 0 | -16.076268 | 1.152487  | -0.211836 |
| 40 | 6 | 0 | -16.266642 | 3.074878  | -1.799525 |
| 41 | 1 | 0 | -17.756728 | 2.570032  | -0.337041 |

|    |   |   |            |           |           |
|----|---|---|------------|-----------|-----------|
| 42 | 8 | 0 | -17.811438 | 2.827755  | 5.968064  |
| 43 | 7 | 0 | -15.616559 | 2.476784  | 6.491032  |
| 44 | 8 | 0 | -14.855271 | 1.001251  | -0.060726 |
| 45 | 7 | 0 | -16.965001 | 0.131649  | -0.201007 |
| 46 | 6 | 0 | -16.987515 | 4.376885  | -2.127142 |
| 47 | 6 | 0 | -16.576767 | 2.021364  | -2.844527 |
| 48 | 1 | 0 | -15.152798 | 3.261510  | -1.807505 |
| 49 | 1 | 0 | -15.879423 | 2.249103  | 7.440334  |
| 50 | 1 | 0 | -14.631674 | 2.567120  | 6.249728  |
| 51 | 1 | 0 | -17.950181 | 0.319183  | -0.347254 |
| 52 | 6 | 0 | -16.571386 | -1.283062 | -0.046657 |
| 53 | 6 | 0 | -16.264548 | 5.169446  | -3.186350 |
| 54 | 1 | 0 | -18.029830 | 4.144390  | -2.472587 |
| 55 | 1 | 0 | -17.085536 | 5.007311  | -1.202902 |
| 56 | 1 | 0 | -16.426073 | 2.440958  | -3.868817 |
| 57 | 1 | 0 | -15.898854 | 1.140750  | -2.724332 |
| 58 | 1 | 0 | -17.635004 | 1.673464  | -2.761773 |
| 59 | 6 | 0 | -17.189655 | -2.045581 | -1.249620 |
| 60 | 6 | 0 | -17.064689 | -1.925447 | 1.246680  |
| 61 | 1 | 0 | -15.478200 | -1.313630 | -0.074312 |
| 62 | 1 | 0 | -16.800366 | 6.130706  | -3.377509 |
| 63 | 1 | 0 | -15.221671 | 5.405298  | -2.861086 |
| 64 | 1 | 0 | -16.211236 | 4.600699  | -4.146016 |
| 65 | 8 | 0 | -18.411293 | -2.063563 | -1.416455 |
| 66 | 7 | 0 | -16.279787 | -2.623736 | -2.082136 |
| 67 | 6 | 0 | -16.723461 | -3.404221 | 1.225723  |
| 68 | 6 | 0 | -16.449169 | -1.257748 | 2.469940  |
| 69 | 1 | 0 | -18.186363 | -1.818152 | 1.298102  |
| 70 | 1 | 0 | -15.291224 | -2.597497 | -1.826970 |
| 71 | 6 | 0 | -16.673452 | -3.360435 | -3.270156 |
| 72 | 1 | 0 | -16.984770 | -3.871172 | 2.205426  |
| 73 | 1 | 0 | -17.298424 | -3.925790 | 0.422228  |
| 74 | 1 | 0 | -15.631894 | -3.553338 | 1.038294  |
| 75 | 1 | 0 | -15.397975 | -1.630028 | 2.604149  |
| 76 | 1 | 0 | -16.383108 | -0.148122 | 2.315981  |
| 77 | 6 | 0 | -16.253625 | -4.835417 | -3.157697 |
| 78 | 6 | 0 | -16.001288 | -2.808844 | -4.549994 |
| 79 | 1 | 0 | -17.758919 | -3.261420 | -3.361898 |
| 80 | 8 | 0 | -15.165050 | -5.160461 | -2.659340 |
| 81 | 7 | 0 | -17.123315 | -5.723573 | -3.698472 |
| 82 | 1 | 0 | -14.913118 | -2.856563 | -4.453139 |
| 83 | 1 | 0 | -16.300172 | -3.434500 | -5.400466 |
| 84 | 1 | 0 | -17.937374 | -5.371625 | -4.191126 |

|     |   |   |            |            |           |
|-----|---|---|------------|------------|-----------|
| 85  | 6 | 0 | -16.765619 | -7.122499  | -3.967409 |
| 86  | 6 | 0 | -16.688716 | -7.320008  | -5.505997 |
| 87  | 6 | 0 | -17.729956 | -8.133717  | -3.380215 |
| 88  | 1 | 0 | -15.779427 | -7.287340  | -3.516358 |
| 89  | 8 | 0 | -17.521205 | -6.800989  | -6.255849 |
| 90  | 7 | 0 | -15.664380 | -8.112783  | -5.913907 |
| 91  | 6 | 0 | -19.175332 | -7.908032  | -3.770332 |
| 92  | 1 | 0 | -17.400796 | -9.152380  | -3.721783 |
| 93  | 1 | 0 | -17.641260 | -8.113166  | -2.259765 |
| 94  | 1 | 0 | -14.935644 | -8.343888  | -5.239032 |
| 95  | 6 | 0 | -15.437938 | -8.409421  | -7.319691 |
| 96  | 6 | 0 | -20.032219 | -9.091392  | -3.373711 |
| 97  | 1 | 0 | -19.564892 | -6.982270  | -3.269864 |
| 98  | 1 | 0 | -19.245286 | -7.740613  | -4.879375 |
| 99  | 1 | 0 | -15.227105 | -9.477060  | -7.455398 |
| 100 | 1 | 0 | -16.338940 | -8.144272  | -7.876969 |
| 101 | 1 | 0 | -14.596026 | -7.830467  | -7.723277 |
| 102 | 6 | 0 | -21.487837 | -8.837736  | -3.762980 |
| 103 | 1 | 0 | -19.659684 | -10.018997 | -3.881917 |
| 104 | 1 | 0 | -19.952888 | -9.260694  | -2.267848 |
| 105 | 7 | 0 | -22.368735 | -9.933538  | -3.432671 |
| 106 | 1 | 0 | -21.812129 | -7.864895  | -3.284586 |
| 107 | 1 | 0 | -21.542588 | -8.688780  | -4.879631 |
| 108 | 1 | 0 | -22.265329 | -10.201291 | -2.474167 |
| 109 | 1 | 0 | -23.320369 | -9.673500  | -3.598822 |
| 110 | 8 | 0 | -12.964804 | 10.369152  | 3.353613  |
| 111 | 6 | 0 | -11.723745 | 10.374640  | 3.378392  |
| 112 | 7 | 0 | -10.946710 | 9.627020   | 2.552765  |
| 113 | 6 | 0 | -10.966875 | 11.231271  | 4.383061  |
| 114 | 6 | 0 | -11.512666 | 8.734313   | 1.530882  |
| 115 | 1 | 0 | -9.931262  | 9.736827   | 2.594089  |
| 116 | 1 | 0 | -11.316837 | 12.264511  | 4.289329  |
| 117 | 1 | 0 | -11.224764 | 10.887150  | 5.390758  |
| 118 | 1 | 0 | -9.884047  | 11.188230  | 4.243031  |
| 119 | 6 | 0 | -10.907426 | 7.326924   | 1.754733  |
| 120 | 6 | 0 | -11.219073 | 9.161067   | 0.093991  |
| 121 | 1 | 0 | -12.597034 | 8.713493   | 1.683992  |
| 122 | 7 | 0 | -11.795287 | 6.337458   | 1.986547  |
| 123 | 8 | 0 | -9.674823  | 7.166733   | 1.731448  |
| 124 | 6 | 0 | -11.864535 | 8.184638   | -0.870395 |
| 125 | 6 | 0 | -11.724249 | 10.563280  | -0.176507 |
| 126 | 1 | 0 | -10.101404 | 9.139990   | -0.066426 |
| 127 | 1 | 0 | -12.796537 | 6.558965   | 1.998111  |



|     |   |   |            |           |           |
|-----|---|---|------------|-----------|-----------|
| 128 | 6 | 0 | -11.386085 | 4.959738  | 2.259189  |
| 129 | 1 | 0 | -11.707987 | 8.526280  | -1.921822 |
| 130 | 1 | 0 | -11.416143 | 7.167084  | -0.760773 |
| 131 | 1 | 0 | -12.963347 | 8.111958  | -0.678957 |
| 132 | 1 | 0 | -11.610588 | 10.807719 | -1.260508 |
| 133 | 1 | 0 | -12.804712 | 10.650033 | 0.096089  |
| 134 | 1 | 0 | -11.147540 | 11.315207 | 0.413235  |
| 135 | 6 | 0 | -12.114606 | 4.030977  | 1.268860  |
| 136 | 6 | 0 | -11.721175 | 4.569987  | 3.712161  |
| 137 | 1 | 0 | -10.308291 | 4.904652  | 2.094854  |
| 138 | 8 | 0 | -13.351181 | 3.954830  | 1.274161  |
| 139 | 7 | 0 | -11.311415 | 3.327288  | 0.435832  |
| 140 | 6 | 0 | -11.225039 | 3.158566  | 4.079668  |
| 141 | 1 | 0 | -11.255023 | 5.310660  | 4.373576  |
| 142 | 1 | 0 | -12.803990 | 4.626307  | 3.863471  |
| 143 | 1 | 0 | -10.299075 | 3.459042  | 0.492048  |
| 144 | 6 | 0 | -11.847195 | 2.416363  | -0.588920 |
| 145 | 6 | 0 | -11.618805 | 2.794595  | 5.507788  |
| 146 | 1 | 0 | -11.698646 | 2.415530  | 3.425421  |
| 147 | 1 | 0 | -10.140215 | 3.082853  | 3.948607  |
| 148 | 6 | 0 | -11.258717 | 1.010537  | -0.303124 |
| 149 | 6 | 0 | -11.493867 | 2.807926  | -2.023008 |
| 150 | 1 | 0 | -12.936233 | 2.407293  | -0.474032 |
| 151 | 8 | 0 | -12.804822 | 2.734699  | 5.858119  |
| 152 | 7 | 0 | -10.592304 | 2.542145  | 6.357836  |
| 153 | 8 | 0 | -10.027661 | 0.839595  | -0.308231 |
| 154 | 7 | 0 | -12.163806 | 0.044794  | -0.038922 |
| 155 | 6 | 0 | -12.004669 | 4.202153  | -2.362200 |
| 156 | 6 | 0 | -12.081227 | 1.784199  | -2.976538 |
| 157 | 1 | 0 | -10.369849 | 2.797836  | -2.128921 |
| 158 | 1 | 0 | -10.825286 | 2.320248  | 7.316534  |
| 159 | 1 | 0 | -9.614929  | 2.615991  | 6.075051  |
| 160 | 1 | 0 | -13.160591 | 0.282009  | -0.033623 |
| 161 | 6 | 0 | -11.774707 | -1.342094 | 0.270014  |
| 162 | 6 | 0 | -11.428754 | 4.722479  | -3.655182 |
| 163 | 1 | 0 | -13.125781 | 4.179866  | -2.427803 |
| 164 | 1 | 0 | -11.736849 | 4.920303  | -1.542056 |
| 165 | 1 | 0 | -11.839795 | 2.057628  | -4.031819 |
| 166 | 1 | 0 | -11.660296 | 0.768772  | -2.775649 |
| 167 | 1 | 0 | -13.192650 | 1.735433  | -2.866763 |
| 168 | 6 | 0 | -12.383258 | -2.249570 | -0.831675 |
| 169 | 6 | 0 | -12.275114 | -1.841226 | 1.623859  |
| 170 | 1 | 0 | -10.681199 | -1.387968 | 0.247322  |

|     |   |   |            |            |           |
|-----|---|---|------------|------------|-----------|
| 171 | 1 | 0 | -11.735878 | 5.785664   | -3.808637 |
| 172 | 1 | 0 | -10.312296 | 4.677238   | -3.637188 |
| 173 | 1 | 0 | -11.790243 | 4.126835   | -4.527697 |
| 174 | 8 | 0 | -13.608405 | -2.283533  | -1.004803 |
| 175 | 7 | 0 | -11.491870 | -2.951279  | -1.572412 |
| 176 | 6 | 0 | -11.878405 | -3.296661  | 1.790269  |
| 177 | 6 | 0 | -11.720684 | -1.003906  | 2.768294  |
| 178 | 1 | 0 | -13.402252 | -1.771498  | 1.636167  |
| 179 | 1 | 0 | -10.497333 | -2.893087  | -1.338122 |
| 180 | 6 | 0 | -11.909184 | -3.838845  | -2.652716 |
| 181 | 1 | 0 | -12.159953 | -3.658007  | 2.808174  |
| 182 | 1 | 0 | -12.402796 | -3.932959  | 1.036331  |
| 183 | 1 | 0 | -10.775649 | -3.421109  | 1.658763  |
| 184 | 1 | 0 | -10.628707 | -1.232078  | 2.897159  |
| 185 | 1 | 0 | -11.802740 | 0.087871   | 2.521140  |
| 186 | 6 | 0 | -11.478428 | -5.280618  | -2.325445 |
| 187 | 6 | 0 | -11.271507 | -3.433486  | -3.999571 |
| 188 | 1 | 0 | -12.996241 | -3.773565  | -2.722374 |
| 189 | 8 | 0 | -10.285480 | -5.544747  | -2.096888 |
| 190 | 7 | 0 | -12.470427 | -6.200086  | -2.336459 |
| 191 | 1 | 0 | -10.184710 | -3.536799  | -3.949335 |
| 192 | 1 | 0 | -11.646848 | -4.108254  | -4.779420 |
| 193 | 1 | 0 | -13.440076 | -5.897611  | -2.470847 |
| 194 | 6 | 0 | -12.198628 | -7.617032  | -2.060450 |
| 195 | 6 | 0 | -12.499170 | -8.477110  | -3.313843 |
| 196 | 6 | 0 | -12.936980 | -8.173272  | -0.860038 |
| 197 | 1 | 0 | -11.125098 | -7.678560  | -1.842293 |
| 198 | 8 | 0 | -13.584930 | -8.420626  | -3.911318 |
| 199 | 7 | 0 | -11.492177 | -9.295759  | -3.686672 |
| 200 | 6 | 0 | -14.446272 | -8.106694  | -0.944584 |
| 201 | 1 | 0 | -12.618599 | -9.244297  | -0.734148 |
| 202 | 1 | 0 | -12.596695 | -7.617529  | 0.057253  |
| 203 | 1 | 0 | -10.584541 | -9.220351  | -3.225914 |
| 204 | 6 | 0 | -11.619167 | -10.181689 | -4.834325 |
| 205 | 6 | 0 | -15.065011 | -8.669116  | 0.318661  |
| 206 | 1 | 0 | -14.785251 | -7.045446  | -1.091702 |
| 207 | 1 | 0 | -14.799002 | -8.686884  | -1.839529 |
| 208 | 1 | 0 | -10.805798 | -10.912147 | -4.806346 |
| 209 | 1 | 0 | -12.578414 | -10.707807 | -4.801966 |
| 210 | 1 | 0 | -11.567465 | -9.629389  | -5.782132 |
| 211 | 6 | 0 | -16.588075 | -8.682441  | 0.206015  |
| 212 | 1 | 0 | -14.690538 | -9.711183  | 0.496563  |
| 213 | 1 | 0 | -14.749918 | -8.046608  | 1.197248  |

|     |   |   |            |           |           |
|-----|---|---|------------|-----------|-----------|
| 214 | 7 | 0 | -17.247025 | -9.164538 | 1.397598  |
| 215 | 1 | 0 | -16.926170 | -7.642101 | -0.083860 |
| 216 | 1 | 0 | -16.880566 | -9.372282 | -0.637746 |
| 217 | 1 | 0 | -16.921951 | -8.678354 | 2.209489  |
| 218 | 1 | 0 | -18.236770 | -9.041496 | 1.318102  |
| 219 | 8 | 0 | -8.820248  | -2.555519 | -0.656034 |
| 220 | 6 | 0 | -7.591133  | -2.465793 | -0.534510 |
| 221 | 6 | 0 | -6.975448  | -1.407802 | 0.415902  |
| 222 | 7 | 0 | -6.703283  | -3.226581 | -1.217074 |
| 223 | 7 | 0 | -7.354003  | -0.080449 | -0.101843 |
| 224 | 6 | 0 | -7.476460  | -1.685452 | 1.832237  |
| 225 | 1 | 0 | -5.882262  | -1.463507 | 0.398853  |
| 226 | 1 | 0 | -5.704921  | -3.124354 | -1.015443 |
| 227 | 6 | 0 | -7.121940  | -4.259843 | -2.159091 |
| 228 | 6 | 0 | -6.436230  | 0.853711  | -0.427958 |
| 229 | 1 | 0 | -8.350958  | 0.158749  | -0.146302 |
| 230 | 6 | 0 | -7.053110  | -3.082309 | 2.245418  |
| 231 | 6 | 0 | -6.947181  | -0.655128 | 2.820433  |
| 232 | 1 | 0 | -8.605015  | -1.637938 | 1.827059  |
| 233 | 6 | 0 | -6.655803  | -5.630881 | -1.638947 |
| 234 | 6 | 0 | -6.496556  | -4.039505 | -3.553727 |
| 235 | 1 | 0 | -8.210524  | -4.225826 | -2.224933 |
| 236 | 6 | 0 | -7.005828  | 2.230754  | -0.855132 |
| 237 | 8 | 0 | -5.206601  | 0.681140  | -0.376687 |
| 238 | 1 | 0 | -7.380369  | -3.285376 | 3.293360  |
| 239 | 1 | 0 | -7.519784  | -3.845934 | 1.576706  |
| 240 | 1 | 0 | -5.942222  | -3.189567 | 2.190530  |
| 241 | 1 | 0 | -5.843348  | -0.808814 | 2.958625  |
| 242 | 1 | 0 | -7.087144  | 0.377457  | 2.403296  |
| 243 | 8 | 0 | -5.455750  | -5.821277 | -1.376170 |
| 244 | 7 | 0 | -7.612723  | -6.580163 | -1.523312 |
| 245 | 1 | 0 | -5.409066  | -4.131460 | -3.498396 |
| 246 | 1 | 0 | -6.875460  | -4.814579 | -4.231882 |
| 247 | 7 | 0 | -6.477540  | 3.220413  | 0.099287  |
| 248 | 6 | 0 | -6.616738  | 2.497052  | -2.307555 |
| 249 | 1 | 0 | -8.097392  | 2.239708  | -0.764635 |
| 250 | 1 | 0 | -8.592023  | -6.338273 | -1.702810 |
| 251 | 6 | 0 | -7.265703  | -7.921940 | -1.039067 |
| 252 | 6 | 0 | -7.280729  | 3.972574  | 0.886742  |
| 253 | 1 | 0 | -5.463994  | 3.341726  | 0.163366  |
| 254 | 6 | 0 | -7.195060  | 3.818241  | -2.797440 |
| 255 | 6 | 0 | -7.105014  | 1.350163  | -3.172438 |
| 256 | 1 | 0 | -5.490803  | 2.543958  | -2.375597 |

|     |   |   |            |            |           |
|-----|---|---|------------|------------|-----------|
| 257 | 6 | 0 | -7.762295  | -9.004891  | -2.022264 |
| 258 | 6 | 0 | -7.744379  | -8.241331  | 0.362154  |
| 259 | 1 | 0 | -6.170451  | -7.953371  | -1.012194 |
| 260 | 6 | 0 | -6.552797  | 4.944166   | 1.836659  |
| 261 | 8 | 0 | -8.518256  | 3.908054   | 0.883102  |
| 262 | 6 | 0 | -6.556565  | 4.278621   | -4.083495 |
| 263 | 1 | 0 | -8.303179  | 3.704525   | -2.942333 |
| 264 | 1 | 0 | -7.045195  | 4.614859   | -2.020819 |
| 265 | 1 | 0 | -6.888124  | 1.557950   | -4.247692 |
| 266 | 1 | 0 | -6.590253  | 0.399311   | -2.889425 |
| 267 | 1 | 0 | -8.206788  | 1.207559   | -3.052055 |
| 268 | 8 | 0 | -8.925025  | -9.034091  | -2.452196 |
| 269 | 7 | 0 | -6.826475  | -9.922482  | -2.349139 |
| 270 | 6 | 0 | -9.235805  | -8.119491  | 0.581228  |
| 271 | 1 | 0 | -7.417131  | -9.290658  | 0.600278  |
| 272 | 1 | 0 | -7.210601  | -7.558362  | 1.080345  |
| 273 | 6 | 0 | -6.860531  | 4.599354   | 3.308106  |
| 274 | 7 | 0 | -6.985549  | 6.305499   | 1.528602  |
| 275 | 1 | 0 | -5.476853  | 4.898243   | 1.657905  |
| 276 | 1 | 0 | -6.946074  | 5.287625   | -4.363215 |
| 277 | 1 | 0 | -5.446843  | 4.347782   | -3.971021 |
| 278 | 1 | 0 | -6.780561  | 3.574704   | -4.920840 |
| 279 | 1 | 0 | -5.870863  | -9.794698  | -2.014312 |
| 280 | 6 | 0 | -7.126441  | -11.039370 | -3.232815 |
| 281 | 6 | 0 | -9.585341  | -8.548413  | 1.991803  |
| 282 | 1 | 0 | -9.567598  | -7.060976  | 0.410354  |
| 283 | 1 | 0 | -9.782299  | -8.757407  | -0.164815 |
| 284 | 6 | 0 | -6.319939  | 3.217696   | 3.724716  |
| 285 | 1 | 0 | -6.407756  | 5.377707   | 3.934457  |
| 286 | 1 | 0 | -7.942862  | 4.633837   | 3.470135  |
| 287 | 6 | 0 | -6.120222  | 7.278978   | 1.175363  |
| 288 | 1 | 0 | -7.984412  | 6.527346   | 1.608991  |
| 289 | 1 | 0 | -6.311713  | -11.766142 | -3.171644 |
| 290 | 1 | 0 | -8.061646  | -11.522355 | -2.931388 |
| 291 | 1 | 0 | -7.232805  | -10.713005 | -4.275596 |
| 292 | 6 | 0 | -11.084528 | -8.401626  | 2.241343  |
| 293 | 1 | 0 | -9.276984  | -9.615261  | 2.150826  |
| 294 | 1 | 0 | -9.008935  | -7.924898  | 2.726375  |
| 295 | 6 | 0 | -6.691604  | 2.895888   | 5.168303  |
| 296 | 1 | 0 | -6.775355  | 2.436586   | 3.103139  |
| 297 | 1 | 0 | -5.234310  | 3.171509   | 3.587602  |
| 298 | 6 | 0 | -6.748062  | 8.670391   | 0.919111  |
| 299 | 8 | 0 | -4.891908  | 7.117752   | 1.071372  |

|     |   |   |            |           |           |
|-----|---|---|------------|-----------|-----------|
| 300 | 7 | 0 | -11.484831 | -8.815395 | 3.565066  |
| 301 | 1 | 0 | -11.373162 | -7.330350 | 2.016287  |
| 302 | 1 | 0 | -11.638126 | -9.052601 | 1.503538  |
| 303 | 7 | 0 | -5.657866  | 2.774806  | 6.034969  |
| 304 | 8 | 0 | -7.873672  | 2.758995  | 5.516619  |
| 305 | 7 | 0 | -6.133250  | 9.614086  | 1.863879  |
| 306 | 6 | 0 | -6.538878  | 9.030599  | -0.549799 |
| 307 | 1 | 0 | -7.821763  | 8.650445  | 1.136141  |
| 308 | 1 | 0 | -10.973087 | -8.320700 | 4.267730  |
| 309 | 1 | 0 | -12.463619 | -8.657447 | 3.697543  |
| 310 | 1 | 0 | -4.684560  | 2.894191  | 5.750930  |
| 311 | 1 | 0 | -5.880077  | 2.585416  | 7.003255  |
| 312 | 6 | 0 | -6.865339  | 10.337457 | 2.749101  |
| 313 | 1 | 0 | -5.121576  | 9.754660  | 1.823225  |
| 314 | 6 | 0 | -7.229380  | 8.006824  | -1.430555 |
| 315 | 6 | 0 | -7.071151  | 10.414977 | -0.857646 |
| 316 | 1 | 0 | -5.431764  | 9.007974  | -0.771460 |
| 317 | 6 | 0 | -6.061108  | 11.247075 | 3.666292  |
| 318 | 8 | 0 | -8.101929  | 10.272713 | 2.839377  |
| 319 | 1 | 0 | -7.116452  | 8.290436  | -2.504608 |
| 320 | 1 | 0 | -6.781600  | 6.993598  | -1.284990 |
| 321 | 1 | 0 | -8.319393  | 7.952903  | -1.189611 |
| 322 | 1 | 0 | -7.008590  | 10.612158 | -1.955389 |
| 323 | 1 | 0 | -8.139477  | 10.502210 | -0.541777 |
| 324 | 1 | 0 | -6.477927  | 11.197971 | -0.327954 |
| 325 | 1 | 0 | -6.467905  | 12.260833 | 3.591633  |
| 326 | 1 | 0 | -6.205709  | 10.909879 | 4.698628  |
| 327 | 1 | 0 | -4.995233  | 11.252147 | 3.425521  |
| 328 | 1 | 0 | 14.941126  | 4.433621  | 3.647169  |
| 329 | 7 | 0 | 13.994456  | 4.417886  | 4.020757  |
| 330 | 6 | 0 | 12.906189  | 4.176221  | 3.249627  |
| 331 | 1 | 0 | 13.842295  | 4.597376  | 5.004554  |
| 332 | 6 | 0 | 13.171932  | 3.932943  | 1.767714  |
| 333 | 8 | 0 | 11.756724  | 4.152063  | 3.710887  |
| 334 | 6 | 0 | 12.495730  | 5.009829  | 0.897399  |
| 335 | 1 | 0 | 12.752074  | 2.946121  | 1.535321  |
| 336 | 1 | 0 | 14.248513  | 3.894461  | 1.567757  |
| 337 | 6 | 0 | 12.671329  | 4.757265  | -0.614560 |
| 338 | 1 | 0 | 12.926314  | 5.992738  | 1.124207  |
| 339 | 1 | 0 | 11.428432  | 5.056020  | 1.136741  |
| 340 | 7 | 0 | 12.138187  | 5.877542  | -1.386145 |
| 341 | 6 | 0 | 11.937562  | 3.469118  | -1.037599 |
| 342 | 1 | 0 | 13.732221  | 4.675869  | -0.858162 |

|     |   |   |           |           |           |
|-----|---|---|-----------|-----------|-----------|
| 343 | 6 | 0 | 12.912474 | 6.626506  | -2.200039 |
| 344 | 1 | 0 | 11.139808 | 6.101335  | -1.300776 |
| 345 | 8 | 0 | 10.705996 | 3.391866  | -0.935632 |
| 346 | 7 | 0 | 12.726633 | 2.469167  | -1.495826 |
| 347 | 6 | 0 | 12.193443 | 7.798093  | -2.913817 |
| 348 | 8 | 0 | 14.129039 | 6.429504  | -2.376285 |
| 349 | 1 | 0 | 13.734705 | 2.620724  | -1.553718 |
| 350 | 6 | 0 | 12.186376 | 1.172223  | -1.942565 |
| 351 | 7 | 0 | 12.850672 | 9.051429  | -2.513161 |
| 352 | 6 | 0 | 12.217963 | 7.530911  | -4.416487 |
| 353 | 1 | 0 | 11.152716 | 7.863617  | -2.577314 |
| 354 | 6 | 0 | 12.793432 | 0.085327  | -1.017205 |
| 355 | 6 | 0 | 12.522451 | 0.824620  | -3.390772 |
| 356 | 1 | 0 | 11.098429 | 1.214773  | -1.821919 |
| 357 | 1 | 0 | 13.823464 | 9.205400  | -2.779937 |
| 358 | 6 | 0 | 12.176593 | 10.056618 | -1.891909 |
| 359 | 6 | 0 | 11.476087 | 6.242221  | -4.716582 |
| 360 | 6 | 0 | 11.595327 | 8.674682  | -5.190179 |
| 361 | 1 | 0 | 13.292370 | 7.411917  | -4.742967 |
| 362 | 8 | 0 | 14.026953 | -0.062283 | -0.959220 |
| 363 | 7 | 0 | 11.901697 | -0.628036 | -0.298042 |
| 364 | 6 | 0 | 11.933404 | 1.844852  | -4.356161 |
| 365 | 6 | 0 | 11.998611 | -0.564838 | -3.703083 |
| 366 | 1 | 0 | 13.645334 | 0.819942  | -3.506642 |
| 367 | 6 | 0 | 13.003807 | 11.287351 | -1.553868 |
| 368 | 8 | 0 | 10.974581 | 9.995082  | -1.593899 |
| 369 | 1 | 0 | 11.436809 | 6.073109  | -5.819585 |
| 370 | 1 | 0 | 11.992517 | 5.370727  | -4.245172 |
| 371 | 1 | 0 | 10.429906 | 6.291467  | -4.326230 |
| 372 | 1 | 0 | 11.519851 | 8.406332  | -6.271969 |
| 373 | 1 | 0 | 10.568870 | 8.893495  | -4.806708 |
| 374 | 1 | 0 | 12.213606 | 9.599802  | -5.103168 |
| 375 | 1 | 0 | 10.900897 | -0.416653 | -0.386577 |
| 376 | 6 | 0 | 12.313909 | -1.628936 | 0.701934  |
| 377 | 6 | 0 | 12.518387 | 1.723692  | -5.740729 |
| 378 | 1 | 0 | 10.819233 | 1.709372  | -4.400856 |
| 379 | 1 | 0 | 12.123148 | 2.885405  | -3.980461 |
| 380 | 1 | 0 | 12.182654 | -0.813741 | -4.775750 |
| 381 | 1 | 0 | 12.514676 | -1.330544 | -3.073463 |
| 382 | 1 | 0 | 10.900074 | -0.624485 | -3.507011 |
| 383 | 1 | 0 | 12.493384 | 12.167052 | -1.958627 |
| 384 | 1 | 0 | 13.029918 | 11.396202 | -0.463995 |
| 385 | 1 | 0 | 14.022715 | 11.234985 | -1.944397 |

|     |   |   |           |            |           |
|-----|---|---|-----------|------------|-----------|
| 386 | 6 | 0 | 11.671279 | -2.981826  | 0.298986  |
| 387 | 6 | 0 | 11.871879 | -1.298868  | 2.127001  |
| 388 | 1 | 0 | 13.406045 | -1.692573  | 0.664257  |
| 389 | 1 | 0 | 12.135189 | 2.547977   | -6.390202 |
| 390 | 1 | 0 | 13.633426 | 1.791059   | -5.706408 |
| 391 | 1 | 0 | 12.240621 | 0.751023   | -6.213584 |
| 392 | 8 | 0 | 10.440795 | -3.105076  | 0.272230  |
| 393 | 7 | 0 | 12.540768 | -3.966901  | -0.034267 |
| 394 | 6 | 0 | 12.363536 | -2.384613  | 3.065279  |
| 395 | 6 | 0 | 12.388313 | 0.062859   | 2.570674  |
| 396 | 1 | 0 | 10.742447 | -1.282747  | 2.154515  |
| 397 | 1 | 0 | 13.543241 | -3.788827  | 0.047715  |
| 398 | 6 | 0 | 12.101754 | -5.301095  | -0.433013 |
| 399 | 1 | 0 | 12.049370 | -2.154740  | 4.111812  |
| 400 | 1 | 0 | 11.932692 | -3.374730  | 2.779096  |
| 401 | 1 | 0 | 13.478153 | -2.456949  | 3.035239  |
| 402 | 1 | 0 | 13.507023 | 0.023665   | 2.659866  |
| 403 | 1 | 0 | 12.143843 | 0.832006   | 1.790525  |
| 404 | 6 | 0 | 12.614693 | -6.330000  | 0.591718  |
| 405 | 6 | 0 | 12.667924 | -5.691683  | -1.816234 |
| 406 | 1 | 0 | 11.011100 | -5.294877  | -0.458813 |
| 407 | 8 | 0 | 13.835697 | -6.423219  | 0.815580  |
| 408 | 7 | 0 | 11.677387 | -7.108862  | 1.176437  |
| 409 | 1 | 0 | 13.757106 | -5.768528  | -1.766752 |
| 410 | 1 | 0 | 12.266877 | -6.675010  | -2.091924 |
| 411 | 1 | 0 | 10.684885 | -6.943731  | 0.977729  |
| 412 | 6 | 0 | 12.072642 | -8.143011  | 2.140845  |
| 413 | 6 | 0 | 11.451831 | -9.509362  | 1.766272  |
| 414 | 6 | 0 | 11.782746 | -7.823482  | 3.593008  |
| 415 | 1 | 0 | 13.161219 | -8.225862  | 2.053078  |
| 416 | 8 | 0 | 10.247114 | -9.656032  | 1.511027  |
| 417 | 7 | 0 | 12.338210 | -10.529633 | 1.761601  |
| 418 | 6 | 0 | 10.342175 | -7.495277  | 3.915620  |
| 419 | 1 | 0 | 12.107204 | -8.710762  | 4.203742  |
| 420 | 1 | 0 | 12.433511 | -6.958059  | 3.902187  |
| 421 | 1 | 0 | 13.322503 | -10.323642 | 1.923808  |
| 422 | 6 | 0 | 11.930576 | -11.897137 | 1.469642  |
| 423 | 6 | 0 | 10.185405 | -7.291008  | 5.409114  |
| 424 | 1 | 0 | 10.023934 | -6.568328  | 3.369097  |
| 425 | 1 | 0 | 9.674283  | -8.327652  | 3.563373  |
| 426 | 1 | 0 | 12.796275 | -12.554419 | 1.585169  |
| 427 | 1 | 0 | 11.141916 | -12.223682 | 2.156799  |
| 428 | 1 | 0 | 11.550104 | -11.988393 | 0.445185  |

|     |   |   |            |           |           |
|-----|---|---|------------|-----------|-----------|
| 429 | 6 | 0 | 8.736759   | -6.960683 | 5.761362  |
| 430 | 1 | 0 | 10.503673  | -8.218637 | 5.954274  |
| 431 | 1 | 0 | 10.863650  | -6.461689 | 5.745934  |
| 432 | 7 | 0 | 8.532690   | -6.749005 | 7.173875  |
| 433 | 1 | 0 | 8.418041   | -6.069909 | 5.139133  |
| 434 | 1 | 0 | 8.082616   | -7.827568 | 5.450180  |
| 435 | 1 | 0 | 9.070063   | -5.973846 | 7.505360  |
| 436 | 1 | 0 | 7.564243   | -6.589577 | 7.366443  |
| 437 | 6 | 0 | -16.467476 | -1.383098 | -4.860715 |
| 438 | 6 | 0 | -11.662656 | -2.011963 | -4.402629 |
| 439 | 6 | 0 | -6.894459  | -2.687328 | -4.140874 |
| 440 | 6 | 0 | 12.243400  | -4.706441 | -2.901547 |
| 441 | 1 | 0 | 14.229704  | -4.350151 | -3.396704 |
| 442 | 1 | 0 | 13.016534  | -3.475440 | -4.325282 |
| 443 | 7 | 0 | 13.254637  | -4.146514 | -3.606301 |
| 444 | 8 | 0 | 11.051665  | -4.453146 | -3.118254 |
| 445 | 1 | 0 | -4.895954  | -2.171142 | -4.372187 |
| 446 | 1 | 0 | -6.091338  | -0.975856 | -4.883238 |
| 447 | 1 | 0 | -9.659189  | -1.474730 | -4.536044 |
| 448 | 1 | 0 | -10.846437 | -0.218799 | -4.897789 |
| 449 | 1 | 0 | -14.486752 | -0.734926 | -4.829152 |
| 450 | 1 | 0 | -15.713658 | 0.486399  | -5.162654 |
| 451 | 7 | 0 | -15.455901 | -0.478923 | -5.004419 |
| 452 | 7 | 0 | -10.627881 | -1.177300 | -4.657594 |
| 453 | 7 | 0 | -5.867671  | -1.893856 | -4.520731 |
| 454 | 8 | 0 | -17.658299 | -1.101362 | -4.987050 |
| 455 | 8 | 0 | -12.847550 | -1.666201 | -4.498696 |
| 456 | 8 | 0 | -8.082689  | -2.359042 | -4.264369 |
| 457 | 6 | 0 | -17.246868 | -1.523659 | 3.721497  |
| 458 | 1 | 0 | -18.285959 | -1.126436 | 3.619613  |
| 459 | 1 | 0 | -17.309707 | -2.618116 | 3.933860  |
| 460 | 1 | 0 | -16.764347 | -1.023188 | 4.595966  |
| 461 | 6 | 0 | -12.452520 | -1.253280 | 4.063138  |
| 462 | 1 | 0 | -12.087477 | -0.548914 | 4.849765  |
| 463 | 1 | 0 | -13.551212 | -1.094629 | 3.932566  |
| 464 | 1 | 0 | -12.289481 | -2.296376 | 4.426327  |
| 465 | 6 | 0 | -7.645148  | -0.723501 | 4.155452  |
| 466 | 1 | 0 | -8.754359  | -0.753043 | 4.022547  |
| 467 | 1 | 0 | -7.335837  | -1.631338 | 4.726767  |
| 468 | 1 | 0 | -7.392593  | 0.181083  | 4.764134  |
| 469 | 6 | 0 | 11.785309  | 0.510629  | 3.878521  |
| 470 | 1 | 0 | 10.676943  | 0.368041  | 3.873073  |
| 471 | 1 | 0 | 12.209056  | -0.064490 | 4.736414  |



|     |   |   |           |           |           |
|-----|---|---|-----------|-----------|-----------|
| 472 | 1 | 0 | 11.995923 | 1.597693  | 4.042849  |
| 473 | 1 | 0 | 0.230882  | 3.315390  | 5.420286  |
| 474 | 7 | 0 | -0.738368 | 3.204911  | 5.721671  |
| 475 | 6 | 0 | -1.778030 | 3.221095  | 4.854641  |
| 476 | 1 | 0 | -0.950533 | 3.093438  | 6.704258  |
| 477 | 6 | 0 | -1.422290 | 3.424760  | 3.386039  |
| 478 | 8 | 0 | -2.954774 | 3.082973  | 5.221350  |
| 479 | 6 | 0 | -2.008291 | 4.745792  | 2.851357  |
| 480 | 1 | 0 | -1.854291 | 2.576860  | 2.839754  |
| 481 | 1 | 0 | -0.336331 | 3.400327  | 3.246636  |
| 482 | 6 | 0 | -1.730402 | 4.956390  | 1.348839  |
| 483 | 1 | 0 | -1.568841 | 5.591245  | 3.394626  |
| 484 | 1 | 0 | -3.088834 | 4.766448  | 3.027263  |
| 485 | 7 | 0 | -2.185608 | 6.277140  | 0.921025  |
| 486 | 6 | 0 | -2.459977 | 3.890539  | 0.507740  |
| 487 | 1 | 0 | -0.656938 | 4.908075  | 1.156515  |
| 488 | 6 | 0 | -1.336942 | 7.219135  | 0.457340  |
| 489 | 1 | 0 | -3.186170 | 6.494082  | 0.992181  |
| 490 | 8 | 0 | -3.696298 | 3.808059  | 0.536575  |
| 491 | 7 | 0 | -1.660629 | 3.082799  | -0.225577 |
| 492 | 6 | 0 | -1.984731 | 8.575670  | 0.086905  |
| 493 | 8 | 0 | -0.109784 | 7.056784  | 0.342043  |
| 494 | 1 | 0 | -0.647516 | 3.218818  | -0.186576 |
| 495 | 6 | 0 | -2.190860 | 2.001551  | -1.073789 |
| 496 | 7 | 0 | -1.352532 | 9.611393  | 0.916633  |
| 497 | 6 | 0 | -1.823553 | 8.793645  | -1.415455 |
| 498 | 1 | 0 | -3.051385 | 8.568946  | 0.337389  |
| 499 | 6 | 0 | -1.623380 | 0.673814  | -0.508715 |
| 500 | 6 | 0 | -1.802641 | 2.117691  | -2.546004 |
| 501 | 1 | 0 | -3.282411 | 2.020939  | -0.984345 |
| 502 | 1 | 0 | -0.346182 | 9.764070  | 0.822949  |
| 503 | 6 | 0 | -2.062348 | 10.393349 | 1.769516  |
| 504 | 6 | 0 | -2.532395 | 7.685301  | -2.170430 |
| 505 | 6 | 0 | -2.377688 | 10.138535 | -1.838409 |
| 506 | 1 | 0 | -0.723729 | 8.756356  | -1.668708 |
| 507 | 8 | 0 | -0.393986 | 0.500856  | -0.449707 |
| 508 | 7 | 0 | -2.542071 | -0.214926 | -0.076961 |
| 509 | 6 | 0 | -2.362796 | 3.392471  | -3.163262 |
| 510 | 6 | 0 | -2.310711 | 0.897749  | -3.291374 |
| 511 | 1 | 0 | -0.676368 | 2.140848  | -2.620186 |
| 512 | 6 | 0 | -1.240815 | 11.394332 | 2.568325  |
| 513 | 8 | 0 | -3.292064 | 10.311992 | 1.920780  |
| 514 | 1 | 0 | -2.463172 | 7.868346  | -3.269714 |

|     |   |   |           |           |           |
|-----|---|---|-----------|-----------|-----------|
| 515 | 1 | 0 | -2.065886 | 6.694659  | -1.948363 |
| 516 | 1 | 0 | -3.611820 | 7.643491  | -1.883660 |
| 517 | 1 | 0 | -2.349323 | 10.229613 | -2.951404 |
| 518 | 1 | 0 | -3.437050 | 10.248485 | -1.500382 |
| 519 | 1 | 0 | -1.776631 | 10.972824 | -1.404538 |
| 520 | 1 | 0 | -3.538476 | 0.021075  | -0.143612 |
| 521 | 6 | 0 | -2.166754 | -1.484671 | 0.569793  |
| 522 | 6 | 0 | -1.742732 | 3.699946  | -4.502857 |
| 523 | 1 | 0 | -3.475872 | 3.290238  | -3.274577 |
| 524 | 1 | 0 | -2.179110 | 4.263146  | -2.478868 |
| 525 | 1 | 0 | -2.081644 | 0.987484  | -4.380318 |
| 526 | 1 | 0 | -1.819216 | -0.029163 | -2.906146 |
| 527 | 1 | 0 | -3.416253 | 0.792705  | -3.166809 |
| 528 | 1 | 0 | -1.676743 | 12.388994 | 2.429562  |
| 529 | 1 | 0 | -1.328561 | 11.142083 | 3.630902  |
| 530 | 1 | 0 | -0.187478 | 11.402414 | 2.277535  |
| 531 | 6 | 0 | -2.786333 | -2.630097 | -0.270098 |
| 532 | 6 | 0 | -2.668769 | -1.619336 | 2.006669  |
| 533 | 1 | 0 | -1.073758 | -1.545738 | 0.559339  |
| 534 | 1 | 0 | -2.112620 | 4.685463  | -4.877131 |
| 535 | 1 | 0 | -0.629314 | 3.749352  | -4.421163 |
| 536 | 1 | 0 | -2.004551 | 2.920656  | -5.258463 |
| 537 | 8 | 0 | -4.014563 | -2.710686 | -0.404147 |
| 538 | 7 | 0 | -1.901478 | -3.478948 | -0.844473 |
| 539 | 6 | 0 | -2.249582 | -2.969529 | 2.556448  |
| 540 | 6 | 0 | -2.136808 | -0.497210 | 2.887451  |
| 541 | 1 | 0 | -3.797272 | -1.568971 | 1.996928  |
| 542 | 1 | 0 | -0.903325 | -3.362113 | -0.649286 |
| 543 | 6 | 0 | -2.323623 | -4.610976 | -1.664224 |
| 544 | 1 | 0 | -2.571818 | -3.064332 | 3.621215  |
| 545 | 1 | 0 | -2.723635 | -3.794424 | 1.970938  |
| 546 | 1 | 0 | -1.139549 | -3.087538 | 2.506745  |
| 547 | 1 | 0 | -1.030688 | -0.630473 | 3.028368  |
| 548 | 1 | 0 | -2.288624 | 0.489760  | 2.374952  |
| 549 | 6 | 0 | -1.849591 | -5.913123 | -0.995585 |
| 550 | 6 | 0 | -1.708728 | -4.546137 | -3.080120 |
| 551 | 1 | 0 | -3.412594 | -4.585715 | -1.725938 |
| 552 | 8 | 0 | -0.642737 | -6.081249 | -0.749542 |
| 553 | 7 | 0 | -2.807933 | -6.831138 | -0.731576 |
| 554 | 1 | 0 | -0.619868 | -4.616827 | -3.021782 |
| 555 | 1 | 0 | -2.081623 | -5.399376 | -3.660586 |
| 556 | 1 | 0 | -3.790587 | -6.601285 | -0.909408 |
| 557 | 6 | 0 | -2.450940 | -8.109173 | -0.104906 |

|     |   |   |           |            |           |
|-----|---|---|-----------|------------|-----------|
| 558 | 6 | 0 | -2.997262 | -9.299484  | -0.925209 |
| 559 | 6 | 0 | -2.857158 | -8.253408  | 1.347249  |
| 560 | 1 | 0 | -1.355856 | -8.151539  | -0.126647 |
| 561 | 8 | 0 | -4.175394 | -9.367658  | -1.308616 |
| 562 | 6 | 0 | -4.326020 | -8.048622  | 1.644545  |
| 563 | 1 | 0 | -2.550256 | -9.282291  | 1.682561  |
| 564 | 1 | 0 | -2.256743 | -7.517416  | 1.952125  |
| 565 | 6 | 0 | -2.420463 | -11.483188 | -1.881806 |
| 566 | 6 | 0 | -4.587665 | -8.300988  | 3.116189  |
| 567 | 1 | 0 | -4.634248 | -7.003406  | 1.376139  |
| 568 | 1 | 0 | -4.944318 | -8.742830  | 1.013519  |
| 569 | 1 | 0 | -1.613263 | -12.208480 | -1.747672 |
| 570 | 1 | 0 | -3.351605 | -11.907812 | -1.492688 |
| 571 | 1 | 0 | -2.553543 | -11.295521 | -2.955201 |
| 572 | 6 | 0 | -6.055882 | -8.058274  | 3.457671  |
| 573 | 1 | 0 | -4.309296 | -9.356637  | 3.374611  |
| 574 | 1 | 0 | -3.932737 | -7.627209  | 3.731682  |
| 575 | 7 | 0 | -6.355954 | -8.266554  | 4.854113  |
| 576 | 1 | 0 | -6.330226 | -7.017151  | 3.107286  |
| 577 | 1 | 0 | -6.690383 | -8.781512  | 2.865931  |
| 578 | 1 | 0 | -5.802957 | -7.669579  | 5.435386  |
| 579 | 1 | 0 | -7.325416 | -8.094143  | 5.030244  |
| 580 | 6 | 0 | -2.129801 | -3.277031  | -3.816098 |
| 581 | 1 | 0 | -0.141795 | -2.736613  | -4.076797 |
| 582 | 1 | 0 | -1.357761 | -1.631903  | -4.724709 |
| 583 | 7 | 0 | -1.118107 | -2.495864  | -4.255403 |
| 584 | 8 | 0 | -3.324278 | -3.000069  | -3.996418 |
| 585 | 6 | 0 | -2.821543 | -0.442531  | 4.229984  |
| 586 | 1 | 0 | -3.931006 | -0.506425  | 4.112519  |
| 587 | 1 | 0 | -2.489440 | -1.281641  | 4.887141  |
| 588 | 1 | 0 | -2.581576 | 0.523995   | 4.741089  |
| 589 | 1 | 0 | -1.113968 | -10.105922 | -0.878925 |
| 590 | 7 | 0 | -2.081641 | -10.264496 | -1.161746 |
| 591 | 1 | 0 | 5.141779  | 3.713371   | 4.969700  |
| 592 | 7 | 0 | 4.178701  | 3.634730   | 5.299014  |
| 593 | 6 | 0 | 3.122242  | 3.568480   | 4.455150  |
| 594 | 1 | 0 | 3.986268  | 3.619869   | 6.291875  |
| 595 | 6 | 0 | 3.448902  | 3.624846   | 2.966832  |
| 596 | 8 | 0 | 1.952796  | 3.470062   | 4.856437  |
| 597 | 6 | 0 | 2.837475  | 4.878466   | 2.311829  |
| 598 | 1 | 0 | 3.017785  | 2.721130   | 2.517597  |
| 599 | 1 | 0 | 4.532256  | 3.596706   | 2.808926  |
| 600 | 6 | 0 | 3.081957  | 4.937008   | 0.790078  |

|     |   |   |          |           |           |
|-----|---|---|----------|-----------|-----------|
| 601 | 1 | 0 | 3.278696 | 5.779482  | 2.755248  |
| 602 | 1 | 0 | 1.760953 | 4.907647  | 2.509772  |
| 603 | 7 | 0 | 2.607307 | 6.204477  | 0.240694  |
| 604 | 6 | 0 | 2.346173 | 3.787674  | 0.074885  |
| 605 | 1 | 0 | 4.151779 | 4.876624  | 0.582095  |
| 606 | 6 | 0 | 3.439963 | 7.098994  | -0.333114 |
| 607 | 1 | 0 | 1.606250 | 6.420704  | 0.305210  |
| 608 | 8 | 0 | 1.109729 | 3.714594  | 0.117151  |
| 609 | 7 | 0 | 3.139451 | 2.899753  | -0.565722 |
| 610 | 6 | 0 | 2.773457 | 8.403625  | -0.832870 |
| 611 | 8 | 0 | 4.666396 | 6.931975  | -0.452710 |
| 612 | 1 | 0 | 4.152591 | 3.039312  | -0.552833 |
| 613 | 6 | 0 | 2.602929 | 1.735823  | -1.291815 |
| 614 | 7 | 0 | 3.411474 | 9.527602  | -0.133178 |
| 615 | 6 | 0 | 2.901490 | 8.458536  | -2.353303 |
| 616 | 1 | 0 | 1.712199 | 8.416598  | -0.560644 |
| 617 | 6 | 0 | 3.179838 | 0.475020  | -0.597630 |
| 618 | 6 | 0 | 2.975473 | 1.699278  | -2.772264 |
| 619 | 1 | 0 | 1.512368 | 1.762033  | -1.192856 |
| 620 | 1 | 0 | 4.415364 | 9.673665  | -0.257832 |
| 621 | 6 | 0 | 2.706556 | 10.404068 | 0.627469  |
| 622 | 6 | 0 | 2.186050 | 7.270825  | -2.968411 |
| 623 | 6 | 0 | 2.327416 | 9.746423  | -2.906946 |
| 624 | 1 | 0 | 3.995999 | 8.400693  | -2.624837 |
| 625 | 8 | 0 | 4.410159 | 0.311376  | -0.532203 |
| 626 | 7 | 0 | 2.267348 | -0.364987 | -0.066592 |
| 627 | 6 | 0 | 2.407453 | 2.903247  | -3.512232 |
| 628 | 6 | 0 | 2.460450 | 0.408808  | -3.381749 |
| 629 | 1 | 0 | 4.100840 | 1.714584  | -2.860526 |
| 630 | 6 | 0 | 3.530226 | 11.498307 | 1.290030  |
| 631 | 8 | 0 | 1.479046 | 10.336163 | 0.800933  |
| 632 | 1 | 0 | 2.226246 | 7.336725  | -4.082313 |
| 633 | 1 | 0 | 2.668317 | 6.313022  | -2.654871 |
| 634 | 1 | 0 | 1.114521 | 7.251197  | -2.651218 |
| 635 | 1 | 0 | 2.330410 | 9.716273  | -4.023605 |
| 636 | 1 | 0 | 1.274984 | 9.886614  | -2.558589 |
| 637 | 1 | 0 | 2.931248 | 10.626235 | -2.580017 |
| 638 | 1 | 0 | 1.269985 | -0.138828 | -0.150854 |
| 639 | 6 | 0 | 2.649612 | -1.557634 | 0.710071  |
| 640 | 6 | 0 | 3.013770 | 3.071935  | -4.882395 |
| 641 | 1 | 0 | 1.293634 | 2.788760  | -3.601900 |
| 642 | 1 | 0 | 2.595505 | 3.840083  | -2.923028 |
| 643 | 1 | 0 | 2.677942 | 0.384908  | -4.476479 |

|     |   |   |          |            |           |
|-----|---|---|----------|------------|-----------|
| 644 | 1 | 0 | 2.956293 | -0.473503  | -2.907643 |
| 645 | 1 | 0 | 1.356301 | 0.317833   | -3.235233 |
| 646 | 1 | 0 | 3.098322 | 12.467467  | 1.019933  |
| 647 | 1 | 0 | 3.438513 | 11.389185  | 2.376249  |
| 648 | 1 | 0 | 4.584072 | 11.465601  | 1.002992  |
| 649 | 6 | 0 | 2.022326 | -2.786377  | 0.004085  |
| 650 | 6 | 0 | 2.160143 | -1.536069  | 2.157251  |
| 651 | 1 | 0 | 3.742614 | -1.619410  | 0.696013  |
| 652 | 1 | 0 | 2.633559 | 4.010388   | -5.354561 |
| 653 | 1 | 0 | 4.127442 | 3.136646   | -4.816962 |
| 654 | 1 | 0 | 2.750947 | 2.215983   | -5.549516 |
| 655 | 8 | 0 | 0.792324 | -2.886919  | -0.096420 |
| 656 | 7 | 0 | 2.902535 | -3.683986  | -0.498659 |
| 657 | 6 | 0 | 2.583628 | -2.819520  | 2.846061  |
| 658 | 6 | 0 | 2.699230 | -0.326256  | 2.907974  |
| 659 | 1 | 0 | 1.031545 | -1.486250  | 2.151464  |
| 660 | 1 | 0 | 3.902946 | -3.544337  | -0.332783 |
| 661 | 6 | 0 | 2.474496 | -4.893023  | -1.196617 |
| 662 | 1 | 0 | 2.264514 | -2.801023  | 3.915835  |
| 663 | 1 | 0 | 2.109593 | -3.702809  | 2.352970  |
| 664 | 1 | 0 | 3.693673 | -2.940292  | 2.806182  |
| 665 | 1 | 0 | 3.805979 | -0.445802  | 3.056115  |
| 666 | 1 | 0 | 2.545955 | 0.599833   | 2.292633  |
| 667 | 6 | 0 | 2.963283 | -6.119859  | -0.407071 |
| 668 | 6 | 0 | 3.071621 | -4.964551  | -2.619204 |
| 669 | 1 | 0 | 1.384768 | -4.877646  | -1.245834 |
| 670 | 8 | 0 | 4.175378 | -6.260821  | -0.169317 |
| 671 | 7 | 0 | 2.012045 | -7.004001  | -0.028008 |
| 672 | 1 | 0 | 4.161128 | -5.031579  | -2.568210 |
| 673 | 1 | 0 | 2.692185 | -5.868864  | -3.111564 |
| 674 | 1 | 0 | 1.026111 | -6.796280  | -0.214354 |
| 675 | 6 | 0 | 2.383638 | -8.209176  | 0.722763  |
| 676 | 6 | 0 | 1.808672 | -9.478185  | 0.053197  |
| 677 | 6 | 0 | 2.024484 | -8.192533  | 2.194171  |
| 678 | 1 | 0 | 3.477220 | -8.261235  | 0.672611  |
| 679 | 8 | 0 | 0.619206 | -9.583374  | -0.284711 |
| 680 | 7 | 0 | 2.716041 | -10.466354 | -0.108118 |
| 681 | 6 | 0 | 0.564280 | -7.963324  | 2.514581  |
| 682 | 1 | 0 | 2.350260 | -9.176760  | 2.630776  |
| 683 | 1 | 0 | 2.637733 | -7.391688  | 2.694808  |
| 684 | 1 | 0 | 3.690150 | -10.284396 | 0.134851  |
| 685 | 6 | 0 | 2.353038 | -11.752601 | -0.684985 |
| 686 | 6 | 0 | 0.350307 | -8.061187  | 4.012071  |

|     |   |   |           |            |           |
|-----|---|---|-----------|------------|-----------|
| 687 | 1 | 0 | 0.240662  | -6.953290  | 2.147964  |
| 688 | 1 | 0 | -0.067819 | -8.722628  | 1.979382  |
| 689 | 1 | 0 | 3.196622  | -12.438934 | -0.573170 |
| 690 | 1 | 0 | 1.480956  | -12.172359 | -0.171973 |
| 691 | 1 | 0 | 2.109370  | -11.660350 | -1.750974 |
| 692 | 6 | 0 | -1.113955 | -7.818909  | 4.370034  |
| 693 | 1 | 0 | 0.664347  | -9.075884  | 4.373591  |
| 694 | 1 | 0 | 1.002907  | -7.309170  | 4.531820  |
| 695 | 7 | 0 | -1.372960 | -7.904722  | 5.787166  |
| 696 | 1 | 0 | -1.421445 | -6.820176  | 3.933935  |
| 697 | 1 | 0 | -1.745833 | -8.606346  | 3.863430  |
| 698 | 1 | 0 | -0.833829 | -7.232842  | 6.294815  |
| 699 | 1 | 0 | -2.345044 | -7.758762  | 5.972409  |
| 700 | 6 | 0 | 2.643437  | -3.771101  | -3.469255 |
| 701 | 1 | 0 | 4.629025  | -3.286936  | -3.841115 |
| 702 | 1 | 0 | 3.405693  | -2.244100  | -4.570716 |
| 703 | 7 | 0 | 3.650381  | -3.057272  | -4.020216 |
| 704 | 8 | 0 | 1.447838  | -3.495156  | -3.642356 |
| 705 | 6 | 0 | 2.022168  | -0.125677  | 4.240519  |
| 706 | 1 | 0 | 0.911896  | -0.198197  | 4.136099  |
| 707 | 1 | 0 | 2.355423  | -0.890895  | 4.981896  |
| 708 | 1 | 0 | 2.267683  | 0.889149   | 4.644094  |
| 709 | 1 | 0 | 10.047017 | 4.102931   | 4.379870  |
| 710 | 7 | 0 | 9.094008  | 4.049112   | 4.739651  |
| 711 | 6 | 0 | 8.019066  | 3.880410   | 3.933597  |
| 712 | 1 | 0 | 8.925461  | 4.138449   | 5.732968  |
| 713 | 6 | 0 | 8.309982  | 3.781376   | 2.439966  |
| 714 | 8 | 0 | 6.861053  | 3.812425   | 4.371530  |
| 715 | 6 | 0 | 7.677197  | 4.958950   | 1.673748  |
| 716 | 1 | 0 | 7.871545  | 2.835129   | 2.098873  |
| 717 | 1 | 0 | 9.389492  | 3.738857   | 2.259095  |
| 718 | 6 | 0 | 7.884339  | 4.861824   | 0.148444  |
| 719 | 1 | 0 | 8.124070  | 5.901874   | 2.011703  |
| 720 | 1 | 0 | 6.605546  | 5.005446   | 1.893369  |
| 721 | 7 | 0 | 7.384687  | 6.062829   | -0.516133 |
| 722 | 6 | 0 | 7.143924  | 3.639130   | -0.425916 |
| 723 | 1 | 0 | 8.949423  | 4.788293   | -0.078929 |
| 724 | 6 | 0 | 8.197566  | 6.903678   | -1.190488 |
| 725 | 1 | 0 | 6.383757  | 6.279742   | -0.450567 |
| 726 | 8 | 0 | 5.910381  | 3.559084   | -0.340756 |
| 727 | 7 | 0 | 7.930118  | 2.698259   | -0.996379 |
| 728 | 6 | 0 | 7.510173  | 8.147622   | -1.802127 |
| 729 | 8 | 0 | 9.423402  | 6.734731   | -1.315593 |

|     |   |   |          |           |           |
|-----|---|---|----------|-----------|-----------|
| 730 | 1 | 0 | 8.940629 | 2.849225  | -1.029482 |
| 731 | 6 | 0 | 7.389690 | 1.459296  | -1.581663 |
| 732 | 7 | 0 | 8.156646 | 9.336764  | -1.230080 |
| 733 | 6 | 0 | 7.604062 | 8.052525  | -3.323101 |
| 734 | 1 | 0 | 6.454970 | 8.181861  | -1.509105 |
| 735 | 6 | 0 | 7.983640 | 0.283004  | -0.764042 |
| 736 | 6 | 0 | 7.741335 | 1.263473  | -3.054702 |
| 737 | 1 | 0 | 6.300636 | 1.491891  | -1.468567 |
| 738 | 1 | 0 | 9.158516 | 9.466414  | -1.382890 |
| 739 | 6 | 0 | 7.461818 | 10.289473 | -0.556718 |
| 740 | 6 | 0 | 6.886436 | 6.804578  | -3.801131 |
| 741 | 6 | 0 | 7.005937 | 9.275283  | -3.987751 |
| 742 | 1 | 0 | 8.692713 | 7.975787  | -3.612875 |
| 743 | 8 | 0 | 9.215847 | 0.130409  | -0.702186 |
| 744 | 7 | 0 | 7.082760 | -0.497344 | -0.132124 |
| 745 | 6 | 0 | 7.156099 | 2.377647  | -3.912573 |
| 746 | 6 | 0 | 7.225447 | -0.087684 | -3.513267 |
| 747 | 1 | 0 | 8.865275 | 1.273980  | -3.160953 |
| 748 | 6 | 0 | 8.294322 | 11.446134 | -0.023944 |
| 749 | 8 | 0 | 6.236852 | 10.242324 | -0.362075 |
| 750 | 1 | 0 | 6.897040 | 6.762522  | -4.916869 |
| 751 | 1 | 0 | 7.387609 | 5.886018  | -3.409530 |
| 752 | 1 | 0 | 5.823733 | 6.806440  | -3.454874 |
| 753 | 1 | 0 | 6.986186 | 9.135771  | -5.095898 |
| 754 | 1 | 0 | 5.959602 | 9.440845  | -3.632185 |
| 755 | 1 | 0 | 7.607590 | 10.187644 | -3.761543 |
| 756 | 1 | 0 | 6.083375 | -0.280886 | -0.220041 |
| 757 | 6 | 0 | 7.479245 | -1.603453 | 0.757857  |
| 758 | 6 | 0 | 7.739313 | 2.396799  | -5.302871 |
| 759 | 1 | 0 | 6.041525 | 2.250870  | -3.970505 |
| 760 | 1 | 0 | 7.349562 | 3.373940  | -3.432896 |
| 761 | 1 | 0 | 7.427066 | -0.228600 | -4.602242 |
| 762 | 1 | 0 | 7.733468 | -0.911750 | -2.954739 |
| 763 | 1 | 0 | 6.124129 | -0.167352 | -3.341325 |
| 764 | 1 | 0 | 7.870554 | 12.381271 | -0.404511 |
| 765 | 1 | 0 | 8.202041 | 11.464127 | 1.067410  |
| 766 | 1 | 0 | 9.347686 | 11.373255 | -0.305445 |
| 767 | 6 | 0 | 6.844295 | -2.900214 | 0.192981  |
| 768 | 6 | 0 | 7.010449 | -1.433438 | 2.201999  |
| 769 | 1 | 0 | 8.572118 | -1.664691 | 0.733935  |
| 770 | 1 | 0 | 7.349257 | 3.278303  | -5.867686 |
| 771 | 1 | 0 | 8.853756 | 2.468635  | -5.263482 |
| 772 | 1 | 0 | 7.467299 | 1.473489  | -5.868811 |

|     |   |   |          |            |           |
|-----|---|---|----------|------------|-----------|
| 773 | 8 | 0 | 5.613442 | -3.016763  | 0.131332  |
| 774 | 7 | 0 | 7.719780 | -3.839273  | -0.238218 |
| 775 | 6 | 0 | 7.447310 | -2.638188  | 3.013627  |
| 776 | 6 | 0 | 7.556198 | -0.151728  | 2.816160  |
| 777 | 1 | 0 | 5.881688 | -1.386096  | 2.207320  |
| 778 | 1 | 0 | 8.721741 | -3.681004  | -0.104889 |
| 779 | 6 | 0 | 7.286301 | -5.117186  | -0.796074 |
| 780 | 1 | 0 | 7.139561 | -2.511384  | 4.079392  |
| 781 | 1 | 0 | 6.972130 | -3.569054  | 2.618960  |
| 782 | 1 | 0 | 8.557353 | -2.758494  | 2.974171  |
| 783 | 1 | 0 | 8.665709 | -0.252323  | 2.957499  |
| 784 | 1 | 0 | 7.388581 | 0.706066   | 2.111993  |
| 785 | 6 | 0 | 7.786462 | -6.252331  | 0.114960  |
| 786 | 6 | 0 | 7.868308 | -5.342632  | -2.208561 |
| 787 | 1 | 0 | 6.196141 | -5.107306  | -0.834596 |
| 788 | 8 | 0 | 9.002446 | -6.364401  | 0.351573  |
| 789 | 7 | 0 | 6.842477 | -7.092490  | 0.596236  |
| 790 | 1 | 0 | 8.958295 | -5.406796  | -2.161776 |
| 791 | 1 | 0 | 7.483905 | -6.294528  | -2.596348 |
| 792 | 1 | 0 | 5.853294 | -6.905998  | 0.402952  |
| 793 | 6 | 0 | 7.224880 | -8.209345  | 1.468565  |
| 794 | 6 | 0 | 6.626737 | -9.541901  | 0.961399  |
| 795 | 6 | 0 | 6.900608 | -8.025005  | 2.936918  |
| 796 | 1 | 0 | 8.316409 | -8.276449  | 1.400376  |
| 797 | 8 | 0 | 5.432057 | -9.672534  | 0.652760  |
| 798 | 7 | 0 | 7.521391 | -10.553623 | 0.912318  |
| 799 | 6 | 0 | 5.449057 | -7.751062  | 3.261102  |
| 800 | 1 | 0 | 7.231427 | -8.956637  | 3.473716  |
| 801 | 1 | 0 | 7.528938 | -7.177928  | 3.331608  |
| 802 | 1 | 0 | 8.500903 | -10.351328 | 1.112473  |
| 803 | 6 | 0 | 7.138254 | -11.898197 | 0.506525  |
| 804 | 6 | 0 | 5.268233 | -7.673054  | 4.764012  |
| 805 | 1 | 0 | 5.120505 | -6.788511  | 2.786910  |
| 806 | 1 | 0 | 4.802624 | -8.563682  | 2.831645  |
| 807 | 1 | 0 | 7.957395 | -12.583898 | 0.739375  |
| 808 | 1 | 0 | 6.240922 | -12.218488 | 1.046133  |
| 809 | 1 | 0 | 6.926761 | -11.950679 | -0.569182 |
| 810 | 6 | 0 | 3.810517 | -7.394545  | 5.122570  |
| 811 | 1 | 0 | 5.594848 | -8.637534  | 5.235301  |
| 812 | 1 | 0 | 5.928056 | -6.863704  | 5.177506  |
| 813 | 7 | 0 | 3.583855 | -7.307635  | 6.545061  |
| 814 | 1 | 0 | 3.486864 | -6.457750  | 4.574966  |
| 815 | 1 | 0 | 3.173462 | -8.240587  | 4.729512  |



|     |   |   |           |           |           |
|-----|---|---|-----------|-----------|-----------|
| 816 | 1 | 0 | 4.117391  | -6.566299 | 6.951836  |
| 817 | 1 | 0 | 2.612728  | -7.160781 | 6.734407  |
| 818 | 6 | 0 | 7.432697  | -4.247729 | -3.178823 |
| 819 | 1 | 0 | 9.414732  | -3.818686 | -3.632107 |
| 820 | 1 | 0 | 8.185812  | -2.855913 | -4.453051 |
| 821 | 7 | 0 | 8.434903  | -3.604196 | -3.818904 |
| 822 | 8 | 0 | 6.236327  | -3.985372 | -3.364181 |
| 823 | 6 | 0 | 6.899670  | 0.181958  | 4.132220  |
| 824 | 1 | 0 | 5.788293  | 0.094490  | 4.054212  |
| 825 | 1 | 0 | 7.249237  | -0.501754 | 4.942531  |
| 826 | 1 | 0 | 7.145749  | 1.233858  | 4.425426  |
| 827 | 1 | 0 | 19.859176 | 4.838906  | 2.836689  |
| 828 | 7 | 0 | 18.934535 | 4.805255  | 3.239425  |
| 829 | 6 | 0 | 17.840549 | 4.447717  | 2.508452  |
| 830 | 1 | 0 | 18.805139 | 5.094842  | 4.200181  |
| 831 | 6 | 0 | 18.094423 | 4.062074  | 1.055517  |
| 832 | 8 | 0 | 16.707829 | 4.437547  | 2.996369  |
| 833 | 6 | 0 | 17.371077 | 5.026052  | 0.094810  |
| 834 | 1 | 0 | 17.705791 | 3.043051  | 0.935235  |
| 835 | 1 | 0 | 19.168644 | 4.033501  | 0.834445  |
| 836 | 6 | 0 | 17.481129 | 4.608005  | -1.387767 |
| 837 | 1 | 0 | 17.795652 | 6.032572  | 0.186941  |
| 838 | 1 | 0 | 16.313495 | 5.086632  | 0.370526  |
| 839 | 7 | 0 | 16.879155 | 5.607849  | -2.257638 |
| 840 | 6 | 0 | 16.755312 | 3.273924  | -1.626404 |
| 841 | 1 | 0 | 18.536318 | 4.538831  | -1.672091 |
| 842 | 6 | 0 | 17.638548 | 6.437352  | -3.020654 |
| 843 | 1 | 0 | 15.860635 | 5.727171  | -2.248104 |
| 844 | 8 | 0 | 15.526909 | 3.205599  | -1.501941 |
| 845 | 7 | 0 | 17.534666 | 2.218147  | -1.963282 |
| 846 | 6 | 0 | 16.834416 | 7.427017  | -3.898947 |
| 847 | 8 | 0 | 18.874680 | 6.435875  | -3.030056 |
| 848 | 1 | 0 | 18.539790 | 2.332121  | -2.012899 |
| 849 | 6 | 0 | 17.001517 | 0.863128  | -2.196598 |
| 850 | 7 | 0 | 17.498049 | 8.731557  | -3.779130 |
| 851 | 6 | 0 | 16.763931 | 6.882373  | -5.323865 |
| 852 | 1 | 0 | 15.814895 | 7.541845  | -3.516146 |
| 853 | 6 | 0 | 17.628999 | -0.058587 | -1.114870 |
| 854 | 6 | 0 | 17.327985 | 0.312917  | -3.582248 |
| 855 | 1 | 0 | 15.914505 | 0.920987  | -2.074748 |
| 856 | 1 | 0 | 18.508082 | 8.726503  | -3.853521 |
| 857 | 6 | 0 | 16.851904 | 9.861973  | -3.388890 |
| 858 | 6 | 0 | 15.987236 | 5.578654  | -5.330941 |

|     |   |   |           |           |           |
|-----|---|---|-----------|-----------|-----------|
| 859 | 6 | 0 | 16.107512 | 7.878130  | -6.258949 |
| 860 | 1 | 0 | 17.811158 | 6.682449  | -5.690220 |
| 861 | 8 | 0 | 18.852036 | -0.082593 | -0.940858 |
| 862 | 7 | 0 | 16.727312 | -0.788722 | -0.405726 |
| 863 | 6 | 0 | 16.635504 | 1.124489  | -4.670684 |
| 864 | 6 | 0 | 16.904103 | -1.141784 | -3.656351 |
| 865 | 1 | 0 | 18.443099 | 0.368142  | -3.742526 |
| 866 | 6 | 0 | 17.724771 | 11.097256 | -3.224420 |
| 867 | 8 | 0 | 15.632297 | 9.909394  | -3.177885 |
| 868 | 1 | 0 | 15.741970 | 5.285348  | -6.380175 |
| 869 | 1 | 0 | 16.588444 | 4.756910  | -4.872496 |
| 870 | 1 | 0 | 15.032873 | 5.685630  | -4.756409 |
| 871 | 1 | 0 | 15.959785 | 7.416424  | -7.265437 |
| 872 | 1 | 0 | 15.111483 | 8.191128  | -5.861149 |
| 873 | 1 | 0 | 16.741752 | 8.787735  | -6.384642 |
| 874 | 1 | 0 | 15.724215 | -0.630941 | -0.549051 |
| 875 | 6 | 0 | 17.138803 | -1.669279 | 0.697392  |
| 876 | 6 | 0 | 17.261012 | 0.908426  | -6.025460 |
| 877 | 1 | 0 | 15.548550 | 0.843275  | -4.705163 |
| 878 | 1 | 0 | 16.681500 | 2.219128  | -4.426827 |
| 879 | 1 | 0 | 17.016354 | -1.523062 | -4.699795 |
| 880 | 1 | 0 | 17.540256 | -1.767092 | -2.983625 |
| 881 | 1 | 0 | 15.836518 | -1.257911 | -3.346697 |
| 882 | 1 | 0 | 17.360236 | 11.874355 | -3.903694 |
| 883 | 1 | 0 | 17.611038 | 11.472286 | -2.202424 |
| 884 | 1 | 0 | 18.784431 | 10.912877 | -3.425697 |
| 885 | 6 | 0 | 16.497834 | -3.049276 | 0.417927  |
| 886 | 6 | 0 | 16.694889 | -1.196626 | 2.080254  |
| 887 | 1 | 0 | 18.234016 | -1.715682 | 0.668442  |
| 888 | 1 | 0 | 16.738375 | 1.532664  | -6.790553 |
| 889 | 1 | 0 | 18.340188 | 1.196469  | -6.013950 |
| 890 | 1 | 0 | 17.187531 | -0.160912 | -6.338442 |
| 891 | 8 | 0 | 15.275833 | -3.156491 | 0.291383  |
| 892 | 7 | 0 | 17.356079 | -4.095511 | 0.268027  |
| 893 | 6 | 0 | 17.030081 | -2.253508 | 3.114806  |
| 894 | 6 | 0 | 17.352177 | 0.129085  | 2.443000  |
| 895 | 1 | 0 | 15.573743 | -1.056526 | 2.065423  |
| 896 | 1 | 0 | 18.329280 | -3.982352 | 0.530622  |
| 897 | 6 | 0 | 16.903099 | -5.463187 | 0.021166  |
| 898 | 1 | 0 | 16.797391 | -1.870362 | 4.137851  |
| 899 | 1 | 0 | 16.426467 | -3.177562 | 2.941050  |
| 900 | 1 | 0 | 18.113994 | -2.519737 | 3.076248  |
| 901 | 1 | 0 | 18.413382 | -0.057640 | 2.756581  |

|     |   |   |           |            |           |
|-----|---|---|-----------|------------|-----------|
| 902 | 1 | 0 | 17.391071 | 0.796526   | 1.541226  |
| 903 | 6 | 0 | 17.420912 | -6.356978  | 1.162397  |
| 904 | 6 | 0 | 17.486470 | -6.004896  | -1.305683 |
| 905 | 1 | 0 | 15.812926 | -5.451269  | -0.020000 |
| 906 | 8 | 0 | 18.617558 | -6.312938  | 1.470907  |
| 907 | 7 | 0 | 16.508303 | -7.184630  | 1.735940  |
| 908 | 1 | 0 | 18.574218 | -6.096104  | -1.212828 |
| 909 | 1 | 0 | 17.078380 | -7.005957  | -1.488010 |
| 910 | 1 | 0 | 15.513301 | -7.073602  | 1.518112  |
| 911 | 6 | 0 | 16.925472 | -8.077671  | 2.819422  |
| 912 | 6 | 0 | 16.244337 | -9.458623  | 2.679166  |
| 913 | 6 | 0 | 16.703283 | -7.547153  | 4.224245  |
| 914 | 1 | 0 | 18.010801 | -8.194698  | 2.696879  |
| 915 | 8 | 0 | 15.085712 | -9.598087  | 2.271196  |
| 916 | 7 | 0 | 17.009474 | -10.505960 | 3.076825  |
| 917 | 6 | 0 | 15.263492 | -7.214526  | 4.550117  |
| 918 | 1 | 0 | 17.080795 | -8.319601  | 4.947917  |
| 919 | 1 | 0 | 17.334222 | -6.627544  | 4.364316  |
| 920 | 1 | 0 | 17.965306 | -10.328708 | 3.353837  |
| 921 | 6 | 0 | 16.511881 | -11.877878 | 3.100253  |
| 922 | 6 | 0 | 15.124022 | -6.873755  | 6.019225  |
| 923 | 1 | 0 | 14.918167 | -6.349068  | 3.924600  |
| 924 | 1 | 0 | 14.602773 | -8.086340  | 4.291875  |
| 925 | 1 | 0 | 17.212175 | -12.499232 | 3.663984  |
| 926 | 1 | 0 | 15.532535 | -11.914036 | 3.587093  |
| 927 | 1 | 0 | 16.412497 | -12.283152 | 2.086317  |
| 928 | 6 | 0 | 13.668657 | -6.558620  | 6.360394  |
| 929 | 1 | 0 | 15.479916 | -7.735031  | 6.643755  |
| 930 | 1 | 0 | 15.774244 | -5.993141  | 6.263590  |
| 931 | 7 | 0 | 13.462920 | -6.291019  | 7.762637  |
| 932 | 1 | 0 | 13.331331 | -5.703307  | 5.699324  |
| 933 | 1 | 0 | 13.029496 | -7.449835  | 6.089201  |
| 934 | 1 | 0 | 14.021489 | -5.521562  | 8.071721  |
| 935 | 1 | 0 | 12.498365 | -6.098748  | 7.943967  |
| 936 | 6 | 0 | 17.093291 | -5.128942  | -2.491270 |
| 937 | 1 | 0 | 19.082662 | -4.680409  | -2.903540 |
| 938 | 1 | 0 | 17.905809 | -3.948155  | -3.956307 |
| 939 | 7 | 0 | 18.122347 | -4.585087  | -3.199272 |
| 940 | 8 | 0 | 15.914997 | -4.934689  | -2.795955 |
| 941 | 6 | 0 | 16.611702 | 0.846786   | 3.543236  |
| 942 | 1 | 0 | 15.521658 | 0.918852   | 3.306820  |
| 943 | 1 | 0 | 16.724136 | 0.312767   | 4.517277  |
| 944 | 1 | 0 | 17.009706 | 1.885665   | 3.660039  |



P Pl (Ac-VQIINK-NHMe)<sub>9</sub>

|    |   |   |            |           |           |
|----|---|---|------------|-----------|-----------|
| 1  | 6 | 0 | -18.560643 | 10.650264 | 5.304402  |
| 2  | 6 | 0 | -19.191701 | 9.896328  | 4.140425  |
| 3  | 1 | 0 | -19.076424 | 11.609765 | 5.415851  |
| 4  | 1 | 0 | -18.733586 | 10.076048 | 6.220963  |
| 5  | 1 | 0 | -17.488123 | 10.815680 | 5.170556  |
| 6  | 8 | 0 | -20.401314 | 9.650696  | 4.100429  |
| 7  | 7 | 0 | -18.313571 | 9.517774  | 3.162661  |
| 8  | 1 | 0 | -17.317883 | 9.723844  | 3.259911  |
| 9  | 6 | 0 | -18.764905 | 8.744980  | 2.001927  |
| 10 | 6 | 0 | -18.205553 | 7.309352  | 2.147071  |
| 11 | 6 | 0 | -18.313179 | 9.302427  | 0.656008  |
| 12 | 1 | 0 | -19.861080 | 8.745990  | 2.047292  |
| 13 | 8 | 0 | -16.981884 | 7.107542  | 2.113939  |
| 14 | 7 | 0 | -19.116060 | 6.330326  | 2.348860  |
| 15 | 6 | 0 | -18.951522 | 8.505302  | -0.465404 |
| 16 | 6 | 0 | -18.663802 | 10.768842 | 0.512943  |
| 17 | 1 | 0 | -17.191142 | 9.190514  | 0.583584  |
| 18 | 1 | 0 | -20.103801 | 6.556966  | 2.334097  |
| 19 | 6 | 0 | -18.762163 | 4.920949  | 2.522044  |
| 20 | 1 | 0 | -18.584921 | 8.877598  | -1.452258 |
| 21 | 1 | 0 | -18.691779 | 7.421982  | -0.378942 |
| 22 | 1 | 0 | -20.063181 | 8.608878  | -0.440129 |
| 23 | 1 | 0 | -18.466997 | 11.106404 | -0.533662 |
| 24 | 1 | 0 | -19.742691 | 10.940410 | 0.743978  |
| 25 | 1 | 0 | -18.047275 | 11.393126 | 1.203278  |
| 26 | 6 | 0 | -19.444245 | 4.124107  | 1.392242  |
| 27 | 6 | 0 | -19.207883 | 4.416328  | 3.910131  |
| 28 | 1 | 0 | -17.676471 | 4.856363  | 2.428612  |
| 29 | 8 | 0 | -20.651127 | 4.253080  | 1.168318  |
| 30 | 7 | 0 | -18.617972 | 3.282327  | 0.709153  |
| 31 | 6 | 0 | -18.681159 | 3.007762  | 4.237647  |
| 32 | 1 | 0 | -18.833491 | 5.128687  | 4.656237  |
| 33 | 1 | 0 | -20.301500 | 4.417197  | 3.974230  |
| 34 | 1 | 0 | -17.609911 | 3.340083  | 0.866552  |
| 35 | 6 | 0 | -19.091060 | 2.489804  | -0.434304 |
| 36 | 6 | 0 | -19.149929 | 2.560004  | 5.624500  |
| 37 | 1 | 0 | -19.080566 | 2.283125  | 3.517110  |
| 38 | 1 | 0 | -17.587907 | 2.976471  | 4.168037  |
| 39 | 6 | 0 | -18.494500 | 1.071201  | -0.274102 |
| 40 | 6 | 0 | -18.679526 | 3.044163  | -1.798781 |
| 41 | 1 | 0 | -20.185973 | 2.477505  | -0.376227 |

|    |   |   |            |           |           |
|----|---|---|------------|-----------|-----------|
| 42 | 8 | 0 | -20.343439 | 2.533268  | 5.931844  |
| 43 | 7 | 0 | -18.154202 | 2.185537  | 6.480252  |
| 44 | 8 | 0 | -17.273793 | 0.925238  | -0.115944 |
| 45 | 7 | 0 | -19.374585 | 0.043300  | -0.304664 |
| 46 | 6 | 0 | -19.407665 | 4.350047  | -2.093252 |
| 47 | 6 | 0 | -18.964448 | 2.023768  | -2.883076 |
| 48 | 1 | 0 | -17.567444 | 3.240708  | -1.783884 |
| 49 | 1 | 0 | -18.430260 | 1.926279  | 7.417627  |
| 50 | 1 | 0 | -17.166388 | 2.291204  | 6.257625  |
| 51 | 1 | 0 | -20.359983 | 0.227388  | -0.453753 |
| 52 | 6 | 0 | -18.970571 | -1.372609 | -0.193052 |
| 53 | 6 | 0 | -18.676295 | 5.184723  | -3.113624 |
| 54 | 1 | 0 | -20.442376 | 4.120099  | -2.462437 |
| 55 | 1 | 0 | -19.525672 | 4.947839  | -1.149837 |
| 56 | 1 | 0 | -18.803115 | 2.479297  | -3.890264 |
| 57 | 1 | 0 | -18.279784 | 1.145882  | -2.782631 |
| 58 | 1 | 0 | -20.020332 | 1.663497  | -2.827674 |
| 59 | 6 | 0 | -19.576391 | -2.099923 | -1.423804 |
| 60 | 6 | 0 | -19.466395 | -2.060182 | 1.075817  |
| 61 | 1 | 0 | -17.877016 | -1.394014 | -0.215038 |
| 62 | 1 | 0 | -19.217930 | 6.147381  | -3.279790 |
| 63 | 1 | 0 | -17.640580 | 5.418281  | -2.764652 |
| 64 | 1 | 0 | -18.603507 | 4.649777  | -4.091269 |
| 65 | 8 | 0 | -20.797290 | -2.125088 | -1.595389 |
| 66 | 7 | 0 | -18.657986 | -2.638565 | -2.273294 |
| 67 | 6 | 0 | -19.112861 | -3.534726 | 1.009635  |
| 68 | 6 | 0 | -18.863760 | -1.427178 | 2.323681  |
| 69 | 1 | 0 | -20.589208 | -1.963641 | 1.123520  |
| 70 | 1 | 0 | -17.670573 | -2.611965 | -2.013792 |
| 71 | 6 | 0 | -19.041662 | -3.335801 | -3.488066 |
| 72 | 1 | 0 | -19.379244 | -4.035582 | 1.971057  |
| 73 | 1 | 0 | -19.676185 | -4.034204 | 0.184159  |
| 74 | 1 | 0 | -18.018452 | -3.669019 | 0.827757  |
| 75 | 1 | 0 | -17.809948 | -1.794185 | 2.451814  |
| 76 | 1 | 0 | -18.806991 | -0.312588 | 2.206142  |
| 77 | 6 | 0 | -18.609712 | -4.810257 | -3.427804 |
| 78 | 6 | 0 | -18.370871 | -2.733437 | -4.745589 |
| 79 | 1 | 0 | -20.127678 | -3.242397 | -3.579240 |
| 80 | 8 | 0 | -17.521501 | -5.144824 | -2.935079 |
| 81 | 7 | 0 | -19.468266 | -5.684712 | -4.007706 |
| 82 | 1 | 0 | -17.282558 | -2.776087 | -4.648198 |
| 83 | 1 | 0 | -18.662801 | -3.330397 | -5.618858 |
| 84 | 1 | 0 | -20.281800 | -5.321199 | -4.492759 |

|     |   |   |            |            |           |
|-----|---|---|------------|------------|-----------|
| 85  | 6 | 0 | -19.094971 | -7.068234  | -4.329933 |
| 86  | 6 | 0 | -19.007155 | -7.202754  | -5.874690 |
| 87  | 6 | 0 | -20.052350 | -8.111697  | -3.789686 |
| 88  | 1 | 0 | -18.109951 | -7.241116  | -3.879436 |
| 89  | 8 | 0 | -19.841416 | -6.663317  | -6.608099 |
| 90  | 7 | 0 | -17.971527 | -7.966662  | -6.308180 |
| 91  | 6 | 0 | -21.497817 | -7.884330  | -4.178453 |
| 92  | 1 | 0 | -19.711354 | -9.112419  | -4.170417 |
| 93  | 1 | 0 | -19.969690 | -8.135761  | -2.668835 |
| 94  | 1 | 0 | -17.243974 | -8.216765  | -5.638732 |
| 95  | 6 | 0 | -17.734051 | -8.203453  | -7.723424 |
| 96  | 6 | 0 | -22.345160 | -9.090773  | -3.834338 |
| 97  | 1 | 0 | -21.898939 | -6.983156  | -3.643429 |
| 98  | 1 | 0 | -21.563645 | -7.673182  | -5.280259 |
| 99  | 1 | 0 | -17.505008 | -9.261311  | -7.899962 |
| 100 | 1 | 0 | -18.636769 | -7.931112  | -8.274437 |
| 101 | 1 | 0 | -16.900052 | -7.595334  | -8.099692 |
| 102 | 6 | 0 | -23.801297 | -8.835278  | -4.220411 |
| 103 | 1 | 0 | -21.961339 | -9.993513  | -4.377698 |
| 104 | 1 | 0 | -22.269393 | -9.303907  | -2.735824 |
| 105 | 7 | 0 | -24.673366 | -9.951568  | -3.938775 |
| 106 | 1 | 0 | -24.137048 | -7.885505  | -3.705003 |
| 107 | 1 | 0 | -23.852306 | -8.642105  | -5.330445 |
| 108 | 1 | 0 | -24.570690 | -10.257666 | -2.991731 |
| 109 | 1 | 0 | -25.626754 | -9.693273  | -4.097450 |
| 110 | 8 | 0 | -15.516503 | 10.197992  | 3.614638  |
| 111 | 6 | 0 | -14.276111 | 10.209402  | 3.663432  |
| 112 | 7 | 0 | -13.479095 | 9.489630   | 2.832209  |
| 113 | 6 | 0 | -13.543866 | 11.039744  | 4.707640  |
| 114 | 6 | 0 | -14.020342 | 8.623420   | 1.774724  |
| 115 | 1 | 0 | -12.465373 | 9.606106   | 2.894493  |
| 116 | 1 | 0 | -13.909963 | 12.069898  | 4.649159  |
| 117 | 1 | 0 | -13.806370 | 10.653408  | 5.698810  |
| 118 | 1 | 0 | -12.459030 | 11.018526  | 4.578580  |
| 119 | 6 | 0 | -13.407002 | 7.214600   | 1.965873  |
| 120 | 6 | 0 | -13.707054 | 9.095808   | 0.356377  |
| 121 | 1 | 0 | -15.106841 | 8.589269   | 1.909194  |
| 122 | 7 | 0 | -14.290623 | 6.211966   | 2.153701  |
| 123 | 8 | 0 | -12.173087 | 7.064249   | 1.956995  |
| 124 | 6 | 0 | -14.325629 | 8.142251   | -0.647647 |
| 125 | 6 | 0 | -14.222682 | 10.500258  | 0.119169  |
| 126 | 1 | 0 | -12.586675 | 9.090924   | 0.214669  |
| 127 | 1 | 0 | -15.293517 | 6.425706   | 2.156437  |

|     |   |   |            |           |           |
|-----|---|---|------------|-----------|-----------|
| 128 | 6 | 0 | -13.875466 | 4.829243  | 2.390092  |
| 129 | 1 | 0 | -14.155175 | 8.516849  | -1.685608 |
| 130 | 1 | 0 | -13.868051 | 7.126581  | -0.560814 |
| 131 | 1 | 0 | -15.426629 | 8.052480  | -0.477292 |
| 132 | 1 | 0 | -14.092768 | 10.778534 | -0.954794 |
| 133 | 1 | 0 | -15.308636 | 10.567495 | 0.375029  |
| 134 | 1 | 0 | -13.664626 | 11.239938 | 0.741446  |
| 135 | 6 | 0 | -14.581379 | 3.927775  | 1.358946  |
| 136 | 6 | 0 | -14.231496 | 4.392517  | 3.824411  |
| 137 | 1 | 0 | -12.794730 | 4.786901  | 2.241822  |
| 138 | 8 | 0 | -15.817297 | 3.841952  | 1.343411  |
| 139 | 7 | 0 | -13.760403 | 3.259289  | 0.514484  |
| 140 | 6 | 0 | -13.733327 | 2.973020  | 4.156450  |
| 141 | 1 | 0 | -13.780590 | 5.114804  | 4.516058  |
| 142 | 1 | 0 | -15.316963 | 4.438406  | 3.959613  |
| 143 | 1 | 0 | -12.750000 | 3.397172  | 0.589775  |
| 144 | 6 | 0 | -14.274424 | 2.384586  | -0.552304 |
| 145 | 6 | 0 | -14.146448 | 2.564583  | 5.566916  |
| 146 | 1 | 0 | -14.192965 | 2.248013  | 3.472697  |
| 147 | 1 | 0 | -12.646211 | 2.906666  | 4.040021  |
| 148 | 6 | 0 | -13.675873 | 0.973748  | -0.316523 |
| 149 | 6 | 0 | -13.907626 | 2.836213  | -1.965297 |
| 150 | 1 | 0 | -15.364656 | 2.360706  | -0.451723 |
| 151 | 8 | 0 | -15.337300 | 2.486256  | 5.896962  |
| 152 | 7 | 0 | -13.131213 | 2.295047  | 6.425094  |
| 153 | 8 | 0 | -12.443410 | 0.813830  | -0.314611 |
| 154 | 7 | 0 | -14.574841 | -0.010311 | -0.102891 |
| 155 | 6 | 0 | -14.427911 | 4.237882  | -2.255628 |
| 156 | 6 | 0 | -14.473363 | 1.845646  | -2.965770 |
| 157 | 1 | 0 | -12.782352 | 2.840699  | -2.057429 |
| 158 | 1 | 0 | -13.376963 | 2.043972  | 7.373346  |
| 159 | 1 | 0 | -12.150235 | 2.383708  | 6.159251  |
| 160 | 1 | 0 | -15.573755 | 0.217554  | -0.098471 |
| 161 | 6 | 0 | -14.175198 | -1.404999 | 0.152520  |
| 162 | 6 | 0 | -13.839930 | 4.815101  | -3.518688 |
| 163 | 1 | 0 | -15.547756 | 4.207528  | -2.337616 |
| 164 | 1 | 0 | -14.178501 | 4.925143  | -1.403818 |
| 165 | 1 | 0 | -14.221810 | 2.162788  | -4.006348 |
| 166 | 1 | 0 | -14.044677 | 0.827304  | -2.799251 |
| 167 | 1 | 0 | -15.585513 | 1.782259  | -2.871850 |
| 168 | 6 | 0 | -14.769149 | -2.273233 | -0.987843 |
| 169 | 6 | 0 | -14.677846 | -1.962845 | 1.482478  |
| 170 | 1 | 0 | -13.081269 | -1.440354 | 0.134163  |



|     |   |   |            |            |           |
|-----|---|---|------------|------------|-----------|
| 171 | 1 | 0 | -14.155240 | 5.880791   | -3.633397 |
| 172 | 1 | 0 | -12.723420 | 4.779385   | -3.487295 |
| 173 | 1 | 0 | -14.184016 | 4.251784   | -4.419253 |
| 174 | 8 | 0 | -15.992726 | -2.308847  | -1.172061 |
| 175 | 7 | 0 | -13.867344 | -2.940601  | -1.747610 |
| 176 | 6 | 0 | -14.268734 | -3.420302  | 1.591677  |
| 177 | 6 | 0 | -14.136428 | -1.167925  | 2.662850  |
| 178 | 1 | 0 | -15.805574 | -1.903511  | 1.491766  |
| 179 | 1 | 0 | -12.874875 | -2.884290  | -1.503952 |
| 180 | 6 | 0 | -14.270795 | -3.791059  | -2.862511 |
| 181 | 1 | 0 | -14.547550 | -3.824126  | 2.594236  |
| 182 | 1 | 0 | -14.787260 | -4.030729  | 0.812717  |
| 183 | 1 | 0 | -13.164832 | -3.529943  | 1.456165  |
| 184 | 1 | 0 | -13.044287 | -1.395594  | 2.791250  |
| 185 | 1 | 0 | -14.222144 | -0.067722  | 2.457980  |
| 186 | 6 | 0 | -13.830559 | -5.240757  | -2.586597 |
| 187 | 6 | 0 | -13.628290 | -3.331783  | -4.189846 |
| 188 | 1 | 0 | -15.357897 | -3.731461  | -2.936941 |
| 189 | 8 | 0 | -12.637165 | -5.503995  | -2.359912 |
| 190 | 7 | 0 | -14.814828 | -6.167179  | -2.640342 |
| 191 | 1 | 0 | -12.540501 | -3.420531  | -4.133180 |
| 192 | 1 | 0 | -13.987701 | -3.985357  | -4.994723 |
| 193 | 1 | 0 | -15.786292 | -5.867891  | -2.768394 |
| 194 | 6 | 0 | -14.532447 | -7.591833  | -2.419667 |
| 195 | 6 | 0 | -14.820714 | -8.403910  | -3.707517 |
| 196 | 6 | 0 | -15.271000 | -8.201782  | -1.245728 |
| 197 | 1 | 0 | -13.459273 | -7.653345  | -2.199690 |
| 198 | 8 | 0 | -15.905270 | -8.334271  | -4.305914 |
| 199 | 7 | 0 | -13.804802 | -9.197139  | -4.109595 |
| 200 | 6 | 0 | -16.780421 | -8.143751  | -1.334177 |
| 201 | 1 | 0 | -14.944557 | -9.274494  | -1.161776 |
| 202 | 1 | 0 | -14.938822 | -7.680863  | -0.305329 |
| 203 | 1 | 0 | -12.898648 | -9.130732  | -3.644358 |
| 204 | 6 | 0 | -13.920137 | -10.037314 | -5.292292 |
| 205 | 6 | 0 | -17.400060 | -8.758909  | -0.096219 |
| 206 | 1 | 0 | -17.127292 | -7.080335  | -1.442036 |
| 207 | 1 | 0 | -17.124838 | -8.691919  | -2.252254 |
| 208 | 1 | 0 | -13.096723 | -10.756953 | -5.293726 |
| 209 | 1 | 0 | -14.871980 | -10.577685 | -5.281681 |
| 210 | 1 | 0 | -13.876402 | -9.446236  | -6.216836 |
| 211 | 6 | 0 | -18.922391 | -8.781182  | -0.217186 |
| 212 | 1 | 0 | -17.017218 | -9.803651  | 0.044171  |
| 213 | 1 | 0 | -17.094706 | -8.167281  | 0.806803  |

|     |   |   |            |           |           |
|-----|---|---|------------|-----------|-----------|
| 214 | 7 | 0 | -19.583104 | -9.311651 | 0.952705  |
| 215 | 1 | 0 | -19.268160 | -7.733998 | -0.471103 |
| 216 | 1 | 0 | -19.204724 | -9.442540 | -1.086812 |
| 217 | 1 | 0 | -19.264738 | -8.853830 | 1.783538  |
| 218 | 1 | 0 | -20.573296 | -9.192059 | 0.873420  |
| 219 | 8 | 0 | -11.206056 | -2.557216 | -0.788142 |
| 220 | 6 | 0 | -9.978433  | -2.465481 | -0.652530 |
| 221 | 6 | 0 | -9.377157  | -1.444413 | 0.346151  |
| 222 | 7 | 0 | -9.080308  | -3.192470 | -1.358122 |
| 223 | 7 | 0 | -9.763001  | -0.099184 | -0.117497 |
| 224 | 6 | 0 | -9.885122  | -1.784666 | 1.746164  |
| 225 | 1 | 0 | -8.283444  | -1.491233 | 0.334769  |
| 226 | 1 | 0 | -8.083853  | -3.090560 | -1.146468 |
| 227 | 6 | 0 | -9.485564  | -4.185441 | -2.348159 |
| 228 | 6 | 0 | -8.850913  | 0.858410  | -0.387960 |
| 229 | 1 | 0 | -10.761541 | 0.132402  | -0.163094 |
| 230 | 6 | 0 | -9.472894  | -3.202100 | 2.095812  |
| 231 | 6 | 0 | -9.351732  | -0.805520 | 2.783231  |
| 232 | 1 | 0 | -11.013284 | -1.729571 | 1.739342  |
| 233 | 6 | 0 | -9.006390  | -5.574346 | -1.891415 |
| 234 | 6 | 0 | -8.859710  | -3.893348 | -3.729365 |
| 235 | 1 | 0 | -10.574319 | -4.159897 | -2.415211 |
| 236 | 6 | 0 | -9.430153  | 2.246768  | -0.762917 |
| 237 | 8 | 0 | -7.620571  | 0.696196  | -0.326599 |
| 238 | 1 | 0 | -9.793130  | -3.446278 | 3.137129  |
| 239 | 1 | 0 | -9.953457  | -3.931633 | 1.399393  |
| 240 | 1 | 0 | -8.363722  | -3.318245 | 2.026473  |
| 241 | 1 | 0 | -8.255946  | -0.994694 | 2.940513  |
| 242 | 1 | 0 | -9.452744  | 0.245518  | 2.402562  |
| 243 | 8 | 0 | -7.805063  | -5.765474 | -1.636022 |
| 244 | 7 | 0 | -9.954525  | -6.537044 | -1.821337 |
| 245 | 1 | 0 | -7.771615  | -3.978360 | -3.675735 |
| 246 | 1 | 0 | -9.230529  | -4.638575 | -4.444493 |
| 247 | 7 | 0 | -8.922349  | 3.201444  | 0.237095  |
| 248 | 6 | 0 | -9.029061  | 2.577254  | -2.198879 |
| 249 | 1 | 0 | -10.522596 | 2.240759  | -0.683563 |
| 250 | 1 | 0 | -10.935589 | -6.296683 | -1.992416 |
| 251 | 6 | 0 | -9.596003  | -7.897038 | -1.400207 |
| 252 | 6 | 0 | -9.742157  | 3.916173  | 1.041887  |
| 253 | 1 | 0 | -7.910819  | 3.331779  | 0.315701  |
| 254 | 6 | 0 | -9.616050  | 3.911809  | -2.639738 |
| 255 | 6 | 0 | -9.496463  | 1.462546  | -3.115772 |
| 256 | 1 | 0 | -7.903024  | 2.638274  | -2.252868 |

|     |   |   |            |            |           |
|-----|---|---|------------|------------|-----------|
| 257 | 6 | 0 | -10.080116 | -8.935348  | -2.436394 |
| 258 | 6 | 0 | -10.075345 | -8.287244  | -0.017316 |
| 259 | 1 | 0 | -8.500566  | -7.919832  | -1.371802 |
| 260 | 6 | 0 | -9.035318  | 4.857264   | 2.036920  |
| 261 | 8 | 0 | -10.979029 | 3.841249   | 1.020189  |
| 262 | 6 | 0 | -8.968649  | 4.432028   | -3.898237 |
| 263 | 1 | 0 | -10.721260 | 3.793007   | -2.801694 |
| 264 | 1 | 0 | -9.483045  | 4.676802   | -1.828990 |
| 265 | 1 | 0 | -9.271590  | 1.717324   | -4.179214 |
| 266 | 1 | 0 | -8.974002  | 0.506254   | -2.867396 |
| 267 | 1 | 0 | -10.597704 | 1.303383   | -3.012400 |
| 268 | 8 | 0 | -11.243414 | -8.958379  | -2.865536 |
| 269 | 7 | 0 | -9.132914  | -9.821070  | -2.813539 |
| 270 | 6 | 0 | -11.568181 | -8.187458  | 0.203267  |
| 271 | 1 | 0 | -9.740590  | -9.344350  | 0.170691  |
| 272 | 1 | 0 | -9.548506  | -7.635718  | 0.734423  |
| 273 | 6 | 0 | -9.363940  | 4.459481   | 3.490032  |
| 274 | 7 | 0 | -9.472636  | 6.226064   | 1.770672  |
| 275 | 1 | 0 | -7.956461  | 4.824067   | 1.873425  |
| 276 | 1 | 0 | -9.366191  | 5.447633   | -4.140236 |
| 277 | 1 | 0 | -7.861055  | 4.508199   | -3.770349 |
| 278 | 1 | 0 | -9.175671  | 3.761234   | -4.766562 |
| 279 | 1 | 0 | -8.178768  | -9.701194  | -2.471394 |
| 280 | 6 | 0 | -9.420202  | -10.890981 | -3.757474 |
| 281 | 6 | 0 | -11.918134 | -8.687415  | 1.590137  |
| 282 | 1 | 0 | -11.907565 | -7.124362  | 0.083433  |
| 283 | 1 | 0 | -12.107890 | -8.792230  | -0.574650 |
| 284 | 6 | 0 | -8.830116  | 3.063306   | 3.865189  |
| 285 | 1 | 0 | -8.920074  | 5.214699   | 4.150221  |
| 286 | 1 | 0 | -10.448469 | 4.488947   | 3.637702  |
| 287 | 6 | 0 | -8.608530  | 7.218740   | 1.471564  |
| 288 | 1 | 0 | -10.474238 | 6.437907   | 1.841207  |
| 289 | 1 | 0 | -8.577113  | -11.587099 | -3.767240 |
| 290 | 1 | 0 | -10.326739 | -11.429794 | -3.461889 |
| 291 | 1 | 0 | -9.571655  | -10.502674 | -4.772942 |
| 292 | 6 | 0 | -13.418715 | -8.561780  | 1.842814  |
| 293 | 1 | 0 | -11.603771 | -9.758975  | 1.697155  |
| 294 | 1 | 0 | -11.347082 | -8.097497  | 2.355946  |
| 295 | 6 | 0 | -9.218673  | 2.692671   | 5.292514  |
| 296 | 1 | 0 | -9.279490  | 2.304469   | 3.212215  |
| 297 | 1 | 0 | -7.743018  | 3.019622   | 3.739152  |
| 298 | 6 | 0 | -9.242920  | 8.613749   | 1.254070  |
| 299 | 8 | 0 | -7.377322  | 7.070857   | 1.386338  |

|     |   |   |            |           |           |
|-----|---|---|------------|-----------|-----------|
| 300 | 7 | 0 | -13.819757 | -9.042550 | 3.143490  |
| 301 | 1 | 0 | -13.713203 | -7.482428 | 1.670003  |
| 302 | 1 | 0 | -13.966863 | -9.178754 | 1.072442  |
| 303 | 7 | 0 | -8.194325  | 2.529693  | 6.163349  |
| 304 | 8 | 0 | -10.405244 | 2.553961  | 5.624663  |
| 305 | 7 | 0 | -8.654004  | 9.526964  | 2.244172  |
| 306 | 6 | 0 | -9.008870  | 9.028694  | -0.196616 |
| 307 | 1 | 0 | -10.320328 | 8.577949  | 1.449495  |
| 308 | 1 | 0 | -13.310104 | -8.582622 | 3.870869  |
| 309 | 1 | 0 | -14.799078 | -8.893626 | 3.282344  |
| 310 | 1 | 0 | -7.217589  | 2.654578  | 5.893294  |
| 311 | 1 | 0 | -8.427325  | 2.306833  | 7.121925  |
| 312 | 6 | 0 | -9.409798  | 10.221745 | 3.132208  |
| 313 | 1 | 0 | -7.642265  | 9.673111  | 2.231550  |
| 314 | 6 | 0 | -9.674684  | 8.032897  | -1.127025 |
| 315 | 6 | 0 | -9.546026  | 10.419561 | -0.464121 |
| 316 | 1 | 0 | -7.897624  | 9.022057  | -0.397709 |
| 317 | 6 | 0 | -8.631654  | 11.105004 | 4.096461  |
| 318 | 8 | 0 | -10.648209 | 10.151719 | 3.189707  |
| 319 | 1 | 0 | -9.543239  | 8.355981  | -2.187745 |
| 320 | 1 | 0 | -9.222286  | 7.018087  | -1.009490 |
| 321 | 1 | 0 | -10.768686 | 7.962965  | -0.909437 |
| 322 | 1 | 0 | -9.465428  | 10.656668 | -1.552746 |
| 323 | 1 | 0 | -10.620408 | 10.487955 | -0.164568 |
| 324 | 1 | 0 | -8.968230  | 11.186998 | 0.104008  |
| 325 | 1 | 0 | -9.035354  | 12.121078 | 4.037396  |
| 326 | 1 | 0 | -8.806673  | 10.740385 | 5.114656  |
| 327 | 1 | 0 | -7.559320  | 11.115252 | 3.886642  |
| 328 | 1 | 0 | 12.410303  | 4.325463  | 4.186048  |
| 329 | 7 | 0 | 11.458875  | 4.283700  | 4.551647  |
| 330 | 6 | 0 | 10.381551  | 4.077768  | 3.757586  |
| 331 | 1 | 0 | 11.293751  | 4.414817  | 5.540896  |
| 332 | 6 | 0 | 10.667155  | 3.916095  | 2.268495  |
| 333 | 8 | 0 | 9.225365   | 4.024367  | 4.202440  |
| 334 | 6 | 0 | 10.024960  | 5.055752  | 1.454306  |
| 335 | 1 | 0 | 10.232152  | 2.953773  | 1.971043  |
| 336 | 1 | 0 | 11.746192  | 3.871417  | 2.085243  |
| 337 | 6 | 0 | 10.230407  | 4.895943  | -0.065890 |
| 338 | 1 | 0 | 10.465693  | 6.015239  | 1.751165  |
| 339 | 1 | 0 | 8.953278   | 5.104083  | 1.673351  |
| 340 | 7 | 0 | 9.716822   | 6.063040  | -0.779059 |
| 341 | 6 | 0 | 9.502093   | 3.642356  | -0.586998 |
| 342 | 1 | 0 | 11.295763  | 4.824292  | -0.292595 |

|     |   |   |           |           |           |
|-----|---|---|-----------|-----------|-----------|
| 343 | 6 | 0 | 10.519802 | 6.884670  | -1.488270 |
| 344 | 1 | 0 | 8.714427  | 6.273714  | -0.717751 |
| 345 | 8 | 0 | 8.270159  | 3.549938  | -0.489812 |
| 346 | 7 | 0 | 10.296680 | 2.690412  | -1.126734 |
| 347 | 6 | 0 | 9.819806  | 8.098550  | -2.144663 |
| 348 | 8 | 0 | 11.746681 | 6.722307  | -1.610506 |
| 349 | 1 | 0 | 11.304829 | 2.853616  | -1.174265 |
| 350 | 6 | 0 | 9.768801  | 1.424121  | -1.663158 |
| 351 | 7 | 0 | 10.452055 | 9.313724  | -1.612460 |
| 352 | 6 | 0 | 9.919005  | 7.951918  | -3.661118 |
| 353 | 1 | 0 | 8.763535  | 8.131545  | -1.855399 |
| 354 | 6 | 0 | 10.383137 | 0.285414  | -0.808060 |
| 355 | 6 | 0 | 10.114332 | 1.179597  | -3.130410 |
| 356 | 1 | 0 | 8.680117  | 1.447249  | -1.544437 |
| 357 | 1 | 0 | 11.452576 | 9.449639  | -1.768991 |
| 358 | 6 | 0 | 9.745682  | 10.281410 | -0.973358 |
| 359 | 6 | 0 | 9.216167  | 6.680544  | -4.097541 |
| 360 | 6 | 0 | 9.309892  | 9.144414  | -4.369320 |
| 361 | 1 | 0 | 11.009279 | 7.876781  | -3.945272 |
| 362 | 8 | 0 | 11.617465 | 0.149942  | -0.750830 |
| 363 | 7 | 0 | 9.496850  | -0.483461 | -0.142012 |
| 364 | 6 | 0 | 9.509608  | 2.254413  | -4.024185 |
| 365 | 6 | 0 | 9.613570  | -0.193778 | -3.536737 |
| 366 | 1 | 0 | 11.237420 | 1.200640  | -3.244011 |
| 367 | 6 | 0 | 10.564883 | 11.463646 | -0.477488 |
| 368 | 8 | 0 | 8.520743  | 10.228144 | -0.780055 |
| 369 | 1 | 0 | 9.235721  | 6.597231  | -5.210841 |
| 370 | 1 | 0 | 9.722434  | 5.781799  | -3.668295 |
| 371 | 1 | 0 | 8.150855  | 6.685603  | -3.759535 |
| 372 | 1 | 0 | 9.294412  | 8.966110  | -5.471960 |
| 373 | 1 | 0 | 8.260996  | 9.311339  | -4.022040 |
| 374 | 1 | 0 | 9.901493  | 10.070340 | -4.173780 |
| 375 | 1 | 0 | 8.494473  | -0.280298 | -0.226055 |
| 376 | 6 | 0 | 9.914659  | -1.549600 | 0.786248  |
| 377 | 6 | 0 | 10.082050 | 2.228901  | -5.418845 |
| 378 | 1 | 0 | 8.396217  | 2.112663  | -4.068425 |
| 379 | 1 | 0 | 9.694987  | 3.269916  | -3.583145 |
| 380 | 1 | 0 | 9.812839  | -0.372213 | -4.620639 |
| 381 | 1 | 0 | 10.134068 | -0.990264 | -2.950395 |
| 382 | 1 | 0 | 8.514002  | -0.280568 | -3.357391 |
| 383 | 1 | 0 | 10.128710 | 12.381741 | -0.884504 |
| 384 | 1 | 0 | 10.474876 | 11.512825 | 0.613130  |
| 385 | 1 | 0 | 11.618531 | 11.395293 | -0.759068 |

|     |   |   |           |            |           |
|-----|---|---|-----------|------------|-----------|
| 386 | 6 | 0 | 9.286668  | -2.874038  | 0.280999  |
| 387 | 6 | 0 | 9.461103  | -1.326246  | 2.228001  |
| 388 | 1 | 0 | 11.007714 | -1.601306  | 0.751703  |
| 389 | 1 | 0 | 9.678299  | 3.085093   | -6.012257 |
| 390 | 1 | 0 | 11.195923 | 2.313777   | -5.390933 |
| 391 | 1 | 0 | 9.815682  | 1.282781   | -5.948640 |
| 392 | 8 | 0 | 8.056370  | -3.005175  | 0.238089  |
| 393 | 7 | 0 | 10.167405 | -3.820772  | -0.122066 |
| 394 | 6 | 0 | 9.912713  | -2.496688  | 3.080727  |
| 395 | 6 | 0 | 10.007797 | -0.019541  | 2.786283  |
| 396 | 1 | 0 | 8.332274  | -1.283781  | 2.244146  |
| 397 | 1 | 0 | 11.169127 | -3.646434  | -0.007778 |
| 398 | 6 | 0 | 9.741986  | -5.124554  | -0.623133 |
| 399 | 1 | 0 | 9.621284  | -2.327286  | 4.145160  |
| 400 | 1 | 0 | 9.433257  | -3.443303  | 2.731262  |
| 401 | 1 | 0 | 11.022258 | -2.617089  | 3.028985  |
| 402 | 1 | 0 | 11.117209 | -0.114899  | 2.932098  |
| 403 | 1 | 0 | 9.841652  | 0.807491   | 2.045932  |
| 404 | 6 | 0 | 10.268446 | -6.218429  | 0.322859  |
| 405 | 6 | 0 | 10.307089 | -5.399392  | -2.034236 |
| 406 | 1 | 0 | 8.651378  | -5.128772  | -0.646930 |
| 407 | 8 | 0 | 11.488450 | -6.305522  | 0.548672  |
| 408 | 7 | 0 | 9.342219  | -7.054558  | 0.844258  |
| 409 | 1 | 0 | 11.398367 | -5.448950  | -2.000578 |
| 410 | 1 | 0 | 9.928684  | -6.370228  | -2.378397 |
| 411 | 1 | 0 | 8.348120  | -6.887318  | 0.659157  |
| 412 | 6 | 0 | 9.751580  | -8.136142  | 1.748056  |
| 413 | 6 | 0 | 9.157382  | -9.491439  | 1.299919  |
| 414 | 6 | 0 | 9.452403  | -7.903242  | 3.214932  |
| 415 | 1 | 0 | 10.842288 | -8.195693  | 1.662259  |
| 416 | 8 | 0 | 7.959912  | -9.642005  | 1.011480  |
| 417 | 7 | 0 | 10.059322 | -10.497722 | 1.280913  |
| 418 | 6 | 0 | 8.004154  | -7.631754  | 3.555345  |
| 419 | 1 | 0 | 9.802074  | -8.812276  | 3.777894  |
| 420 | 1 | 0 | 10.079217 | -7.037014  | 3.568280  |
| 421 | 1 | 0 | 11.040064 | -10.278521 | 1.456074  |
| 422 | 6 | 0 | 9.684159  | -11.861376 | 0.936237  |
| 423 | 6 | 0 | 7.848259  | -7.504191  | 5.057613  |
| 424 | 1 | 0 | 7.658077  | -6.688967  | 3.054655  |
| 425 | 1 | 0 | 7.358496  | -8.464527  | 3.165082  |
| 426 | 1 | 0 | 10.489421 | -12.536948 | 1.237620  |
| 427 | 1 | 0 | 8.765849  | -12.144905 | 1.460193  |
| 428 | 1 | 0 | 9.511669  | -11.974700 | -0.141963 |

|     |   |   |            |           |           |
|-----|---|---|------------|-----------|-----------|
| 429 | 6 | 0 | 6.393732   | -7.229228 | 5.431483  |
| 430 | 1 | 0 | 8.193694   | -8.448388 | 5.555811  |
| 431 | 1 | 0 | 8.505766   | -6.674084 | 5.431730  |
| 432 | 7 | 0 | 6.189806   | -7.097307 | 6.853904  |
| 433 | 1 | 0 | 6.050607   | -6.314731 | 4.858581  |
| 434 | 1 | 0 | 5.759724   | -8.094586 | 5.077429  |
| 435 | 1 | 0 | 6.720884   | -6.336592 | 7.226647  |
| 436 | 1 | 0 | 5.220238   | -6.955913 | 7.054974  |
| 437 | 6 | 0 | -18.847304 | -1.301297 | -5.007140 |
| 438 | 6 | 0 | -14.038210 | -1.903372 | -4.547262 |
| 439 | 6 | 0 | -9.267725  | -2.518311 | -4.253060 |
| 440 | 6 | 0 | 9.844280   | -4.348811 | -3.040009 |
| 441 | 1 | 0 | 11.814415  | -3.900145 | -3.524719 |
| 442 | 1 | 0 | 10.561783  | -2.989227 | -4.368566 |
| 443 | 7 | 0 | 10.829297  | -3.709598 | -3.710030 |
| 444 | 8 | 0 | 8.641629   | -4.115736 | -3.224658 |
| 445 | 1 | 0 | -7.273135  | -1.976314 | -4.456875 |
| 446 | 1 | 0 | -8.477601  | -0.768635 | -4.915534 |
| 447 | 1 | 0 | -12.043428 | -1.323843 | -4.615848 |
| 448 | 1 | 0 | -13.247390 | -0.075803 | -4.949228 |
| 449 | 1 | 0 | -16.870559 | -0.642559 | -4.961492 |
| 450 | 1 | 0 | -18.105853 | 0.581551  | -5.250700 |
| 451 | 7 | 0 | -17.841613 | -0.387090 | -5.127142 |
| 452 | 7 | 0 | -13.015253 | -1.038980 | -4.742815 |
| 453 | 7 | 0 | -8.246959  | -1.700807 | -4.595962 |
| 454 | 8 | 0 | -20.040369 | -1.022794 | -5.118812 |
| 455 | 8 | 0 | -15.227641 | -1.577415 | -4.657312 |
| 456 | 8 | 0 | -10.458425 | -2.193690 | -4.362574 |
| 457 | 6 | 0 | -19.665865 | -1.740739 | 3.561305  |
| 458 | 1 | 0 | -20.708044 | -1.349968 | 3.466245  |
| 459 | 1 | 0 | -19.719632 | -2.842022 | 3.737851  |
| 460 | 1 | 0 | -19.192857 | -1.264444 | 4.454278  |
| 461 | 6 | 0 | -14.876660 | -1.471403 | 3.941262  |
| 462 | 1 | 0 | -14.515774 | -0.801823 | 4.759504  |
| 463 | 1 | 0 | -15.974342 | -1.305971 | 3.810649  |
| 464 | 1 | 0 | -14.717011 | -2.529258 | 4.260631  |
| 465 | 6 | 0 | -10.082839 | -0.904707 | 4.098401  |
| 466 | 1 | 0 | -11.188980 | -0.882368 | 3.940415  |
| 467 | 1 | 0 | -9.823947  | -1.849406 | 4.633908  |
| 468 | 1 | 0 | -9.808587  | -0.039846 | 4.753288  |
| 469 | 6 | 0 | 9.351265   | 0.370720  | 4.086671  |
| 470 | 1 | 0 | 8.239567   | 0.285212  | 4.010905  |
| 471 | 1 | 0 | 9.696759   | -0.280840 | 4.924738  |

|     |   |   |           |           |           |
|-----|---|---|-----------|-----------|-----------|
| 472 | 1 | 0 | 9.601580  | 1.432611  | 4.336950  |
| 473 | 1 | 0 | -2.306636 | 3.105608  | 5.637501  |
| 474 | 7 | 0 | -3.279751 | 2.975896  | 5.918815  |
| 475 | 6 | 0 | -4.305919 | 3.022947  | 5.037307  |
| 476 | 1 | 0 | -3.506252 | 2.821095  | 6.892275  |
| 477 | 6 | 0 | -3.929259 | 3.291859  | 3.584571  |
| 478 | 8 | 0 | -5.487488 | 2.862894  | 5.379446  |
| 479 | 6 | 0 | -4.505602 | 4.637304  | 3.102864  |
| 480 | 1 | 0 | -4.355492 | 2.471267  | 2.994027  |
| 481 | 1 | 0 | -2.841501 | 3.271502  | 3.459271  |
| 482 | 6 | 0 | -4.204589 | 4.917906  | 1.616198  |
| 483 | 1 | 0 | -4.074243 | 5.456021  | 3.691628  |
| 484 | 1 | 0 | -5.588831 | 4.651168  | 3.262351  |
| 485 | 7 | 0 | -4.661886 | 6.254312  | 1.242324  |
| 486 | 6 | 0 | -4.914226 | 3.888060  | 0.715471  |
| 487 | 1 | 0 | -3.127912 | 4.884094  | 1.439218  |
| 488 | 6 | 0 | -3.812369 | 7.222558  | 0.837831  |
| 489 | 1 | 0 | -5.664846 | 6.461259  | 1.306874  |
| 490 | 8 | 0 | -6.150707 | 3.801121  | 0.717637  |
| 491 | 7 | 0 | -4.098701 | 3.114476  | -0.036840 |
| 492 | 6 | 0 | -4.463312 | 8.590310  | 0.518345  |
| 493 | 8 | 0 | -2.582382 | 7.074339  | 0.737471  |
| 494 | 1 | 0 | -3.086917 | 3.253824  | 0.023716  |
| 495 | 6 | 0 | -4.610307 | 2.070960  | -0.941653 |
| 496 | 7 | 0 | -3.855131 | 9.589255  | 1.408938  |
| 497 | 6 | 0 | -4.273577 | 8.880123  | -0.968482 |
| 498 | 1 | 0 | -5.534672 | 8.565063  | 0.746401  |
| 499 | 6 | 0 | -4.034390 | 0.722858  | -0.436943 |
| 500 | 6 | 0 | -4.209963 | 2.262238  | -2.402811 |
| 501 | 1 | 0 | -5.702662 | 2.075843  | -0.861210 |
| 502 | 1 | 0 | -2.846865 | 9.746963  | 1.348173  |
| 503 | 6 | 0 | -4.588295 | 10.330090 | 2.278307  |
| 504 | 6 | 0 | -4.959305 | 7.804531  | -1.789284 |
| 505 | 6 | 0 | -4.828595 | 10.240109 | -1.338705 |
| 506 | 1 | 0 | -3.168644 | 8.861537  | -1.200743 |
| 507 | 8 | 0 | -2.804135 | 0.558719  | -0.376339 |
| 508 | 7 | 0 | -4.947941 | -0.195079 | -0.057513 |
| 509 | 6 | 0 | -4.779086 | 3.558882  | -2.963727 |
| 510 | 6 | 0 | -4.696766 | 1.074090  | -3.211109 |
| 511 | 1 | 0 | -3.083365 | 2.301454  | -2.464682 |
| 512 | 6 | 0 | -3.790442 | 11.296377 | 3.141190  |
| 513 | 8 | 0 | -5.821274 | 10.239078 | 2.395118  |
| 514 | 1 | 0 | -4.866163 | 8.038078  | -2.877175 |



|     |   |   |           |           |           |
|-----|---|---|-----------|-----------|-----------|
| 515 | 1 | 0 | -4.492802 | 6.806703  | -1.602143 |
| 516 | 1 | 0 | -6.044706 | 7.745097  | -1.529516 |
| 517 | 1 | 0 | -4.778993 | 10.383743 | -2.445391 |
| 518 | 1 | 0 | -5.895115 | 10.327644 | -1.017029 |
| 519 | 1 | 0 | -4.241960 | 11.056564 | -0.854134 |
| 520 | 1 | 0 | -5.945775 | 0.035740  | -0.117606 |
| 521 | 6 | 0 | -4.564186 | -1.491517 | 0.528799  |
| 522 | 6 | 0 | -4.143848 | 3.941489  | -4.276598 |
| 523 | 1 | 0 | -5.888861 | 3.447484  | -3.096986 |
| 524 | 1 | 0 | -4.617899 | 4.396464  | -2.233869 |
| 525 | 1 | 0 | -4.461938 | 1.220652  | -4.292641 |
| 526 | 1 | 0 | -4.195273 | 0.135794  | -2.868655 |
| 527 | 1 | 0 | -5.801578 | 0.948582  | -3.099821 |
| 528 | 1 | 0 | -4.221846 | 12.296562 | 3.030317  |
| 529 | 1 | 0 | -3.909481 | 11.001133 | 4.189517  |
| 530 | 1 | 0 | -2.729185 | 11.314869 | 2.881473  |
| 531 | 6 | 0 | -5.171077 | -2.601331 | -0.366459 |
| 532 | 6 | 0 | -5.068977 | -1.699334 | 1.955964  |
| 533 | 1 | 0 | -3.470673 | -1.542732 | 0.518860  |
| 534 | 1 | 0 | -4.524611 | 4.937972  | -4.608506 |
| 535 | 1 | 0 | -3.032812 | 4.004897  | -4.174518 |
| 536 | 1 | 0 | -4.380617 | 3.195792  | -5.073251 |
| 537 | 8 | 0 | -6.398321 | -2.686448 | -0.508827 |
| 538 | 7 | 0 | -4.276708 | -3.414984 | -0.976019 |
| 539 | 6 | 0 | -4.641772 | -3.071709 | 2.440899  |
| 540 | 6 | 0 | -4.546974 | -0.617986 | 2.892048  |
| 541 | 1 | 0 | -6.197720 | -1.656221 | 1.945210  |
| 542 | 1 | 0 | -3.280133 | -3.298290 | -0.772131 |
| 543 | 6 | 0 | -4.686489 | -4.511363 | -1.848629 |
| 544 | 1 | 0 | -4.962694 | -3.218728 | 3.500114  |
| 545 | 1 | 0 | -5.111436 | -3.870592 | 1.817055  |
| 546 | 1 | 0 | -3.531085 | -3.180863 | 2.385246  |
| 547 | 1 | 0 | -3.441992 | -0.756307 | 3.037036  |
| 548 | 1 | 0 | -4.695136 | 0.391437  | 2.424187  |
| 549 | 6 | 0 | -4.200656 | -5.839820 | -1.242758 |
| 550 | 6 | 0 | -4.070495 | -4.376408 | -3.259041 |
| 551 | 1 | 0 | -5.775525 | -4.493556 | -1.911020 |
| 552 | 8 | 0 | -2.993686 | -6.006219 | -0.997137 |
| 553 | 7 | 0 | -5.148983 | -6.782694 | -1.034991 |
| 554 | 1 | 0 | -2.981142 | -4.439105 | -3.202130 |
| 555 | 1 | 0 | -4.434380 | -5.206322 | -3.877817 |
| 556 | 1 | 0 | -6.133412 | -6.555185 | -1.205148 |
| 557 | 6 | 0 | -4.779283 | -8.088747 | -0.477162 |

|     |   |   |           |            |           |
|-----|---|---|-----------|------------|-----------|
| 558 | 6 | 0 | -5.313287 | -9.238536  | -1.360769 |
| 559 | 6 | 0 | -5.184573 | -8.315362  | 0.964740  |
| 560 | 1 | 0 | -3.683786 | -8.119166  | -0.500012 |
| 561 | 8 | 0 | -6.491953 | -9.300098  | -1.744135 |
| 562 | 6 | 0 | -6.654649 | -8.136152  | 1.272343  |
| 563 | 1 | 0 | -4.871471 | -9.359293  | 1.242932  |
| 564 | 1 | 0 | -4.588611 | -7.610176  | 1.609437  |
| 565 | 6 | 0 | -4.714146 | -11.358741 | -2.437861 |
| 566 | 6 | 0 | -6.914869 | -8.470215  | 2.727874  |
| 567 | 1 | 0 | -6.969167 | -7.079668  | 1.061572  |
| 568 | 1 | 0 | -7.268699 | -8.798513  | 0.604046  |
| 569 | 1 | 0 | -3.891775 | -12.074728 | -2.356520 |
| 570 | 1 | 0 | -5.631636 | -11.823033 | -2.061626 |
| 571 | 1 | 0 | -4.865952 | -11.112331 | -3.496760 |
| 572 | 6 | 0 | -8.383715 | -8.251340  | 3.082465  |
| 573 | 1 | 0 | -6.632988 | -9.537585  | 2.927628  |
| 574 | 1 | 0 | -6.261832 | -7.829302  | 3.379434  |
| 575 | 7 | 0 | -8.682419 | -8.534649  | 4.465967  |
| 576 | 1 | 0 | -8.662049 | -7.194078  | 2.788031  |
| 577 | 1 | 0 | -9.016072 | -8.944370  | 2.453472  |
| 578 | 1 | 0 | -8.127632 | -7.971001  | 5.078022  |
| 579 | 1 | 0 | -9.651324 | -8.370161  | 4.652454  |
| 580 | 6 | 0 | -4.502883 | -3.079846  | -3.938547 |
| 581 | 1 | 0 | -2.520091 | -2.508437  | -4.168637 |
| 582 | 1 | 0 | -3.746080 | -1.386838  | -4.768141 |
| 583 | 7 | 0 | -3.498558 | -2.269659  | -4.339832 |
| 584 | 8 | 0 | -5.699993 | -2.807383  | -4.109367 |
| 585 | 6 | 0 | -5.244310 | -0.625993  | 4.229174  |
| 586 | 1 | 0 | -6.352675 | -0.683095  | 4.098523  |
| 587 | 1 | 0 | -4.918845 | -1.495459  | 4.849128  |
| 588 | 1 | 0 | -5.008823 | 0.315130   | 4.787459  |
| 589 | 1 | 0 | -3.420078 | -10.023376 | -1.364533 |
| 590 | 7 | 0 | -4.386878 | -10.177148 | -1.653493 |
| 591 | 1 | 0 | 2.603656  | 3.528653   | 5.284626  |
| 592 | 7 | 0 | 1.634716  | 3.434487   | 5.593148  |
| 593 | 6 | 0 | 0.593295  | 3.412898   | 4.728910  |
| 594 | 1 | 0 | 1.424816  | 3.369934   | 6.580448  |
| 595 | 6 | 0 | 0.946049  | 3.543174   | 3.251298  |
| 596 | 8 | 0 | -0.583281 | 3.296242   | 5.104346  |
| 597 | 6 | 0 | 0.341512  | 4.825167   | 2.646753  |
| 598 | 1 | 0 | 0.526638  | 2.660776   | 2.751453  |
| 599 | 1 | 0 | 2.032161  | 3.526028   | 3.112284  |
| 600 | 6 | 0 | 0.614691  | 4.958420   | 1.134638  |

|     |   |   |           |           |           |
|-----|---|---|-----------|-----------|-----------|
| 601 | 1 | 0 | 0.770370  | 5.704795  | 3.142149  |
| 602 | 1 | 0 | -0.738817 | 4.840951  | 2.824448  |
| 603 | 7 | 0 | 0.141862  | 6.248321  | 0.637638  |
| 604 | 6 | 0 | -0.100674 | 3.840120  | 0.352295  |
| 605 | 1 | 0 | 1.688613  | 4.914346  | 0.944174  |
| 606 | 6 | 0 | 0.979651  | 7.176651  | 0.127812  |
| 607 | 1 | 0 | -0.861273 | 6.455626  | 0.695433  |
| 608 | 8 | 0 | -1.336914 | 3.751718  | 0.377062  |
| 609 | 7 | 0 | 0.709150  | 2.995172  | -0.324609 |
| 610 | 6 | 0 | 0.314605  | 8.502637  | -0.315489 |
| 611 | 8 | 0 | 2.208959  | 7.024074  | 0.024500  |
| 612 | 1 | 0 | 1.720748  | 3.145324  | -0.293649 |
| 613 | 6 | 0 | 0.192487  | 1.866432  | -1.117874 |
| 614 | 7 | 0 | 0.929532  | 9.590076  | 0.459081  |
| 615 | 6 | 0 | 0.476995  | 8.642041  | -1.827111 |
| 616 | 1 | 0 | -0.752594 | 8.494784  | -0.067349 |
| 617 | 6 | 0 | 0.774083  | 0.574887  | -0.486498 |
| 618 | 6 | 0 | 0.581813  | 1.912908  | -2.593803 |
| 619 | 1 | 0 | -0.899355 | 1.877400  | -1.031025 |
| 620 | 1 | 0 | 1.934704  | 9.749665  | 0.362904  |
| 621 | 6 | 0 | 0.204235  | 10.413337 | 1.258403  |
| 622 | 6 | 0 | -0.214642 | 7.485297  | -2.523121 |
| 623 | 6 | 0 | -0.094447 | 9.954579  | -2.322515 |
| 624 | 1 | 0 | 1.577911  | 8.606481  | -2.075763 |
| 625 | 8 | 0 | 2.004946  | 0.420615  | -0.414158 |
| 626 | 7 | 0 | -0.135249 | -0.304278 | -0.015946 |
| 627 | 6 | 0 | 0.008357  | 3.148588  | -3.274937 |
| 628 | 6 | 0 | 0.088258  | 0.651374  | -3.277091 |
| 629 | 1 | 0 | 1.707865  | 1.944826  | -2.667979 |
| 630 | 6 | 0 | 1.007908  | 11.469023 | 2.003001  |
| 631 | 8 | 0 | -1.025907 | 10.327192 | 1.404638  |
| 632 | 1 | 0 | -0.145189 | 7.610422  | -3.630485 |
| 633 | 1 | 0 | 0.264877  | 6.514445  | -2.247785 |
| 634 | 1 | 0 | -1.294075 | 7.443956  | -2.236418 |
| 635 | 1 | 0 | -0.064998 | 9.986144  | -3.438752 |
| 636 | 1 | 0 | -1.155876 | 10.068056 | -1.992238 |
| 637 | 1 | 0 | 0.494356  | 10.819092 | -1.933302 |
| 638 | 1 | 0 | -1.133822 | -0.083267 | -0.096633 |
| 639 | 6 | 0 | 0.253003  | -1.533210 | 0.698889  |
| 640 | 6 | 0 | 0.626461  | 3.396042  | -4.627755 |
| 641 | 1 | 0 | -1.103233 | 3.027754  | -3.382203 |
| 642 | 1 | 0 | 0.180651  | 4.054630  | -2.634917 |
| 643 | 1 | 0 | 0.318588  | 0.687902  | -4.368840 |

|     |   |   |           |            |           |
|-----|---|---|-----------|------------|-----------|
| 644 | 1 | 0 | 0.588896  | -0.249171  | -2.844140 |
| 645 | 1 | 0 | -1.016373 | 0.541004   | -3.148842 |
| 646 | 1 | 0 | 0.562205  | 12.448642  | 1.802264  |
| 647 | 1 | 0 | 0.913972  | 11.279067  | 3.077954  |
| 648 | 1 | 0 | 2.063510  | 11.472081  | 1.720503  |
| 649 | 6 | 0 | -0.361425 | -2.728289  | -0.072795 |
| 650 | 6 | 0 | -0.241889 | -1.590402  | 2.143293  |
| 651 | 1 | 0 | 1.346479  | -1.586109  | 0.686759  |
| 652 | 1 | 0 | 0.240970  | 4.354372   | -5.053423 |
| 653 | 1 | 0 | 1.738667  | 3.468526   | -4.547181 |
| 654 | 1 | 0 | 0.379528  | 2.574149   | -5.342097 |
| 655 | 8 | 0 | -1.590156 | -2.829077  | -0.190588 |
| 656 | 7 | 0 | 0.528047  | -3.596949  | -0.609017 |
| 657 | 6 | 0 | 0.176058  | -2.910711  | 2.762363  |
| 658 | 6 | 0 | 0.297930  | -0.425342  | 2.961485  |
| 659 | 1 | 0 | -1.370283 | -1.537668  | 2.136132  |
| 660 | 1 | 0 | 1.526829  | -3.458120  | -0.431263 |
| 661 | 6 | 0 | 0.112743  | -4.770981  | -1.371329 |
| 662 | 1 | 0 | -0.134886 | -2.944427  | 3.834162  |
| 663 | 1 | 0 | -0.308870 | -3.763764  | 2.228314  |
| 664 | 1 | 0 | 1.284792  | -3.037991  | 2.707700  |
| 665 | 1 | 0 | 1.399309  | -0.568923  | 3.127513  |
| 666 | 1 | 0 | 0.172832  | 0.531246   | 2.387894  |
| 667 | 6 | 0 | 0.613045  | -6.035329  | -0.651195 |
| 668 | 6 | 0 | 0.711848  | -4.760855  | -2.795535 |
| 669 | 1 | 0 | -0.977055 | -4.763659  | -1.421421 |
| 670 | 8 | 0 | 1.825264  | -6.176656  | -0.415967 |
| 671 | 7 | 0 | -0.328595 | -6.953439  | -0.332069 |
| 672 | 1 | 0 | 1.802121  | -4.813780  | -2.745654 |
| 673 | 1 | 0 | 0.345753  | -5.644196  | -3.333833 |
| 674 | 1 | 0 | -1.316537 | -6.745594  | -0.506231 |
| 675 | 6 | 0 | 0.057167  | -8.199131  | 0.341080  |
| 676 | 6 | 0 | -0.503539 | -9.429733  | -0.407178 |
| 677 | 6 | 0 | -0.301313 | -8.280550  | 1.810520  |
| 678 | 1 | 0 | 1.151338  | -8.235095  | 0.287532  |
| 679 | 8 | 0 | -1.692453 | -9.526639  | -0.750199 |
| 680 | 7 | 0 | 0.414870  | -10.395510 | -0.629292 |
| 681 | 6 | 0 | -1.762711 | -8.080848  | 2.144995  |
| 682 | 1 | 0 | 0.030107  | -9.289305  | 2.182069  |
| 683 | 1 | 0 | 0.307648  | -7.510537  | 2.362141  |
| 684 | 1 | 0 | 1.387856  | -10.217243 | -0.378143 |
| 685 | 6 | 0 | 0.067672  | -11.648148 | -1.284225 |
| 686 | 6 | 0 | -1.976342 | -8.279111  | 3.632571  |

|     |   |   |           |            |           |
|-----|---|---|-----------|------------|-----------|
| 687 | 1 | 0 | -2.091508 | -7.050305  | 1.846345  |
| 688 | 1 | 0 | -2.390838 | -8.806145  | 1.560267  |
| 689 | 1 | 0 | 0.899889  | -12.347972 | -1.170070 |
| 690 | 1 | 0 | -0.829038 | -12.081675 | -0.829003 |
| 691 | 1 | 0 | -0.129408 | -11.503025 | -2.354208 |
| 692 | 6 | 0 | -3.440348 | -8.060509  | 4.006391  |
| 693 | 1 | 0 | -1.662762 | -9.315969  | 3.924964  |
| 694 | 1 | 0 | -1.323055 | -7.564155  | 4.201479  |
| 695 | 7 | 0 | -3.698651 | -8.236924  | 5.415286  |
| 696 | 1 | 0 | -3.748396 | -7.035992  | 3.635330  |
| 697 | 1 | 0 | -4.072596 | -8.813972  | 3.450946  |
| 698 | 1 | 0 | -3.155350 | -7.602385  | 5.964853  |
| 699 | 1 | 0 | -4.669735 | -8.097663  | 5.610685  |
| 700 | 6 | 0 | 0.265882  | -3.532105  | -3.583440 |
| 701 | 1 | 0 | 2.243281  | -2.982169  | -3.900077 |
| 702 | 1 | 0 | 1.004069  | -1.925227  | -4.582967 |
| 703 | 7 | 0 | 1.261311  | -2.762676  | -4.076257 |
| 704 | 8 | 0 | -0.934424 | -3.276708  | -3.758086 |
| 705 | 6 | 0 | -0.405580 | -0.277841  | 4.287218  |
| 706 | 1 | 0 | -1.514427 | -0.320993  | 4.154905  |
| 707 | 1 | 0 | -0.105255 | -1.086615  | 4.995689  |
| 708 | 1 | 0 | -0.149241 | 0.709760   | 4.747410  |
| 709 | 1 | 0 | 7.509095  | 3.933392   | 4.806779  |
| 710 | 7 | 0 | 6.547330  | 3.859588   | 5.141316  |
| 711 | 6 | 0 | 5.490339  | 3.746815   | 4.303423  |
| 712 | 1 | 0 | 6.356802  | 3.886922   | 6.134292  |
| 713 | 6 | 0 | 5.814118  | 3.739688   | 2.813362  |
| 714 | 8 | 0 | 4.322149  | 3.656699   | 4.710719  |
| 715 | 6 | 0 | 5.190714  | 4.957756   | 2.104955  |
| 716 | 1 | 0 | 5.389863  | 2.813381   | 2.405573  |
| 717 | 1 | 0 | 6.897393  | 3.713557   | 2.654507  |
| 718 | 6 | 0 | 5.429249  | 4.950271   | 0.580953  |
| 719 | 1 | 0 | 5.626132  | 5.881077   | 2.506148  |
| 720 | 1 | 0 | 4.114675  | 4.987222   | 2.305534  |
| 721 | 7 | 0 | 4.939079  | 6.186127   | -0.024113 |
| 722 | 6 | 0 | 4.704311  | 3.761243   | -0.077752 |
| 723 | 1 | 0 | 6.498952  | 4.891850   | 0.371908  |
| 724 | 6 | 0 | 5.762002  | 7.065972   | -0.634182 |
| 725 | 1 | 0 | 3.935546  | 6.392739   | 0.028417  |
| 726 | 8 | 0 | 3.468447  | 3.678800   | -0.030631 |
| 727 | 7 | 0 | 5.505493  | 2.850426   | -0.674910 |
| 728 | 6 | 0 | 5.080428  | 8.337499   | -1.194429 |
| 729 | 8 | 0 | 6.990801  | 6.909958   | -0.741850 |

|     |   |   |          |           |           |
|-----|---|---|----------|-----------|-----------|
| 730 | 1 | 0 | 6.517251 | 3.001051  | -0.671904 |
| 731 | 6 | 0 | 4.979717 | 1.648006  | -1.343741 |
| 732 | 7 | 0 | 5.701678 | 9.499796  | -0.544148 |
| 733 | 6 | 0 | 5.213286 | 8.324923  | -2.715509 |
| 734 | 1 | 0 | 4.018061 | 8.349111  | -0.926659 |
| 735 | 6 | 0 | 5.577108 | 0.426737  | -0.597958 |
| 736 | 6 | 0 | 5.343925 | 1.549168  | -2.823573 |
| 737 | 1 | 0 | 3.889604 | 1.665010  | -1.238513 |
| 738 | 1 | 0 | 6.705645 | 9.648429  | -0.665945 |
| 739 | 6 | 0 | 4.980590 | 10.408897 | 0.160865  |
| 740 | 6 | 0 | 4.513616 | 7.102399  | -3.278299 |
| 741 | 6 | 0 | 4.626534 | 9.579677  | -3.328731 |
| 742 | 1 | 0 | 6.309346 | 8.267571  | -2.980829 |
| 743 | 8 | 0 | 6.809601 | 0.281686  | -0.533783 |
| 744 | 7 | 0 | 4.678594 | -0.401522 | -0.025768 |
| 745 | 6 | 0 | 4.759636 | 2.713221  | -3.613022 |
| 746 | 6 | 0 | 4.838369 | 0.227861  | -3.371834 |
| 747 | 1 | 0 | 6.468573 | 1.571571  | -2.919445 |
| 748 | 6 | 0 | 5.786784 | 11.544441 | 0.773358  |
| 749 | 8 | 0 | 3.751562 | 10.339393 | 0.323315  |
| 750 | 1 | 0 | 4.557488 | 7.117951  | -4.393906 |
| 751 | 1 | 0 | 5.005245 | 6.165372  | -2.919791 |
| 752 | 1 | 0 | 3.441120 | 7.085158  | -2.964224 |
| 753 | 1 | 0 | 4.632611 | 9.498507  | -4.442828 |
| 754 | 1 | 0 | 3.571814 | 9.724139  | -2.989134 |
| 755 | 1 | 0 | 5.219958 | 10.480113 | -3.041251 |
| 756 | 1 | 0 | 3.678309 | -0.189478 | -0.109631 |
| 757 | 6 | 0 | 5.080241 | -1.556292 | 0.797450  |
| 758 | 6 | 0 | 5.354374 | 2.825401  | -4.993990 |
| 759 | 1 | 0 | 3.646380 | 2.584515  | -3.689055 |
| 760 | 1 | 0 | 4.942936 | 3.677519  | -3.068309 |
| 761 | 1 | 0 | 5.052260 | 0.156151  | -4.465199 |
| 762 | 1 | 0 | 5.343702 | -0.627685 | -2.860226 |
| 763 | 1 | 0 | 3.735572 | 0.134019  | -3.217140 |
| 764 | 1 | 0 | 5.359266 | 12.493725 | 0.434148  |
| 765 | 1 | 0 | 5.670395 | 11.502363 | 1.861797  |
| 766 | 1 | 0 | 6.846732 | 11.498422 | 0.511840  |
| 767 | 6 | 0 | 4.458234 | -2.820809 | 0.151823  |
| 768 | 6 | 0 | 4.604754 | -1.476896 | 2.247253  |
| 769 | 1 | 0 | 6.173668 | -1.608032 | 0.774933  |
| 770 | 1 | 0 | 4.960300 | 3.737045  | -5.505691 |
| 771 | 1 | 0 | 6.467662 | 2.905237  | -4.940060 |
| 772 | 1 | 0 | 5.096461 | 1.936992  | -5.619271 |

|     |   |   |          |            |           |
|-----|---|---|----------|------------|-----------|
| 773 | 8 | 0 | 3.228135 | -2.939761  | 0.072384  |
| 774 | 7 | 0 | 5.342901 | -3.728527  | -0.324435 |
| 775 | 6 | 0 | 5.043353 | -2.727316  | 2.985594  |
| 776 | 6 | 0 | 5.143212 | -0.233221  | 2.941064  |
| 777 | 1 | 0 | 3.475871 | -1.434414  | 2.250548  |
| 778 | 1 | 0 | 6.343732 | -3.570296  | -0.178417 |
| 779 | 6 | 0 | 4.921229 | -4.970765  | -0.965762 |
| 780 | 1 | 0 | 4.735992 | -2.664545  | 4.057133  |
| 781 | 1 | 0 | 4.569153 | -3.633525  | 2.536175  |
| 782 | 1 | 0 | 6.153573 | -2.843700  | 2.938565  |
| 783 | 1 | 0 | 6.250642 | -0.343650  | 3.091267  |
| 784 | 1 | 0 | 4.986616 | 0.664137   | 2.285333  |
| 785 | 6 | 0 | 5.436832 | -6.158855  | -0.134823 |
| 786 | 6 | 0 | 5.500537 | -5.094955  | -2.392055 |
| 787 | 1 | 0 | 3.830889 | -4.970679  | -1.000095 |
| 788 | 8 | 0 | 6.653840 | -6.275156  | 0.090178  |
| 789 | 7 | 0 | 4.503004 | -7.040247  | 0.291372  |
| 790 | 1 | 0 | 6.591283 | -5.147509  | -2.352978 |
| 791 | 1 | 0 | 5.125867 | -6.023805  | -2.840509 |
| 792 | 1 | 0 | 3.511676 | -6.851187  | 0.114632  |
| 793 | 6 | 0 | 4.902076 | -8.212629  | 1.079170  |
| 794 | 6 | 0 | 4.325970 | -9.511757  | 0.470763  |
| 795 | 6 | 0 | 4.574872 | -8.143540  | 2.556498  |
| 796 | 1 | 0 | 5.994771 | -8.256895  | 1.007560  |
| 797 | 8 | 0 | 3.130860 | -9.641687  | 0.161883  |
| 798 | 7 | 0 | 5.240334 | -10.496363 | 0.328551  |
| 799 | 6 | 0 | 3.120167 | -7.913136  | 2.899804  |
| 800 | 1 | 0 | 4.917956 | -9.108305  | 3.022317  |
| 801 | 1 | 0 | 5.192293 | -7.320099  | 3.013521  |
| 802 | 1 | 0 | 6.217002 | -10.295465 | 0.545179  |
| 803 | 6 | 0 | 4.879400 | -11.807718 | -0.190209 |
| 804 | 6 | 0 | 2.939466 | -7.952814  | 4.404300  |
| 805 | 1 | 0 | 2.779884 | -6.921039  | 2.500730  |
| 806 | 1 | 0 | 2.483467 | -8.698208  | 2.409056  |
| 807 | 1 | 0 | 5.734188 | -12.479318 | -0.074342 |
| 808 | 1 | 0 | 4.025860 | -12.218180 | 0.360209  |
| 809 | 1 | 0 | 4.608179 | -11.758511 | -1.252357 |
| 810 | 6 | 0 | 1.480565 | -7.711490  | 4.783911  |
| 811 | 1 | 0 | 3.272527 | -8.948799  | 4.799324  |
| 812 | 1 | 0 | 3.594412 | -7.173648  | 4.879177  |
| 813 | 7 | 0 | 1.252692 | -7.742867  | 6.208567  |
| 814 | 1 | 0 | 1.152673 | -6.734349  | 4.314926  |
| 815 | 1 | 0 | 0.847075 | -8.525170  | 4.322724  |

|     |   |   |           |           |           |
|-----|---|---|-----------|-----------|-----------|
| 816 | 1 | 0 | 1.792604  | -7.043642 | 6.676890  |
| 817 | 1 | 0 | 0.282697  | -7.603043 | 6.408797  |
| 818 | 6 | 0 | 5.047599  | -3.944149 | -3.286557 |
| 819 | 1 | 0 | 7.022349  | -3.457280 | -3.708967 |
| 820 | 1 | 0 | 5.777490  | -2.458865 | -4.464101 |
| 821 | 7 | 0 | 6.038677  | -3.245220 | -3.883037 |
| 822 | 8 | 0 | 3.846653  | -3.688065 | -3.453768 |
| 823 | 6 | 0 | 4.469233  | 0.025341  | 4.265156  |
| 824 | 1 | 0 | 3.358711  | -0.051621 | 4.166598  |
| 825 | 1 | 0 | 4.804278  | -0.706827 | 5.038412  |
| 826 | 1 | 0 | 4.715375  | 1.056797  | 4.623468  |
| 827 | 1 | 0 | 17.297165 | 4.652000  | 3.421980  |
| 828 | 7 | 0 | 16.351613 | 4.639924  | 3.798613  |
| 829 | 6 | 0 | 15.263731 | 4.366563  | 3.037641  |
| 830 | 1 | 0 | 16.199915 | 4.852288  | 4.775914  |
| 831 | 6 | 0 | 15.529578 | 4.076151  | 1.564203  |
| 832 | 8 | 0 | 14.114935 | 4.350884  | 3.501072  |
| 833 | 6 | 0 | 14.840365 | 5.115659  | 0.659415  |
| 834 | 1 | 0 | 15.120488 | 3.077430  | 1.365414  |
| 835 | 1 | 0 | 16.606191 | 4.042634  | 1.363754  |
| 836 | 6 | 0 | 15.016589 | 4.813544  | -0.843284 |
| 837 | 1 | 0 | 15.260311 | 6.110407  | 0.851993  |
| 838 | 1 | 0 | 13.772980 | 5.158069  | 0.898986  |
| 839 | 7 | 0 | 14.470781 | 5.900792  | -1.652087 |
| 840 | 6 | 0 | 14.295346 | 3.504097  | -1.219623 |
| 841 | 1 | 0 | 16.077927 | 4.734400  | -1.085794 |
| 842 | 6 | 0 | 15.235662 | 6.628880  | -2.493306 |
| 843 | 1 | 0 | 13.469810 | 6.115360  | -1.574156 |
| 844 | 8 | 0 | 13.064624 | 3.418265  | -1.113927 |
| 845 | 7 | 0 | 15.094328 | 2.496219  | -1.641652 |
| 846 | 6 | 0 | 14.503128 | 7.767294  | -3.245946 |
| 847 | 8 | 0 | 16.453958 | 6.438849  | -2.664975 |
| 848 | 1 | 0 | 16.100690 | 2.656142  | -1.707606 |
| 849 | 6 | 0 | 14.566641 | 1.179220  | -2.042575 |
| 850 | 7 | 0 | 15.146619 | 9.040692  | -2.888832 |
| 851 | 6 | 0 | 14.529608 | 7.449363  | -4.738652 |
| 852 | 1 | 0 | 13.462005 | 7.832728  | -2.910732 |
| 853 | 6 | 0 | 15.192848 | 0.130724  | -1.086310 |
| 854 | 6 | 0 | 14.897261 | 0.788420  | -3.481041 |
| 855 | 1 | 0 | 13.479056 | 1.213069  | -1.916077 |
| 856 | 1 | 0 | 16.117291 | 9.196603  | -3.162291 |
| 857 | 6 | 0 | 14.462179 | 10.058386 | -2.300275 |
| 858 | 6 | 0 | 13.801215 | 6.143440  | -4.993894 |



|     |   |   |           |           |           |
|-----|---|---|-----------|-----------|-----------|
| 859 | 6 | 0 | 13.894666 | 8.559529  | -5.550343 |
| 860 | 1 | 0 | 15.605052 | 7.330575  | -5.061827 |
| 861 | 8 | 0 | 16.428280 | -0.000919 | -1.033045 |
| 862 | 7 | 0 | 14.314974 | -0.567927 | -0.336152 |
| 863 | 6 | 0 | 14.289106 | 1.769411  | -4.474836 |
| 864 | 6 | 0 | 14.388290 | -0.616675 | -3.744016 |
| 865 | 1 | 0 | 16.019296 | 0.793392  | -3.604780 |
| 866 | 6 | 0 | 15.276105 | 11.308730 | -2.004843 |
| 867 | 8 | 0 | 13.261216 | 9.993446  | -1.998432 |
| 868 | 1 | 0 | 13.763460 | 5.936122  | -6.090409 |
| 869 | 1 | 0 | 14.326887 | 5.294139  | -4.493093 |
| 870 | 1 | 0 | 12.754667 | 6.195063  | -4.604818 |
| 871 | 1 | 0 | 13.820339 | 8.253230  | -6.622086 |
| 872 | 1 | 0 | 12.866643 | 8.781476  | -5.172925 |
| 873 | 1 | 0 | 14.503996 | 9.493078  | -5.496405 |
| 874 | 1 | 0 | 13.311241 | -0.371359 | -0.424369 |
| 875 | 6 | 0 | 14.746820 | -1.530299 | 0.692858  |
| 876 | 6 | 0 | 14.864904 | 1.609517  | -5.859302 |
| 877 | 1 | 0 | 13.176291 | 1.619755  | -4.506253 |
| 878 | 1 | 0 | 14.469418 | 2.823877  | -4.134952 |
| 879 | 1 | 0 | 14.570383 | -0.899405 | -4.808604 |
| 880 | 1 | 0 | 14.916155 | -1.354662 | -3.091510 |
| 881 | 1 | 0 | 13.291430 | -0.682348 | -3.540633 |
| 882 | 1 | 0 | 14.755629 | 12.168788 | -2.438010 |
| 883 | 1 | 0 | 15.302391 | 11.454335 | -0.919272 |
| 884 | 1 | 0 | 16.295068 | 11.254453 | -2.395002 |
| 885 | 6 | 0 | 14.114659 | -2.902278 | 0.341536  |
| 886 | 6 | 0 | 14.315007 | -1.156605 | 2.110223  |
| 887 | 1 | 0 | 15.839154 | -1.584175 | 0.646516  |
| 888 | 1 | 0 | 14.466256 | 2.406907  | -6.532625 |
| 889 | 1 | 0 | 15.979218 | 1.691908  | -5.836347 |
| 890 | 1 | 0 | 14.595886 | 0.618267  | -6.297345 |
| 891 | 8 | 0 | 12.885258 | -3.038044 | 0.327831  |
| 892 | 7 | 0 | 14.991847 | -3.889756 | 0.037110  |
| 893 | 6 | 0 | 14.820931 | -2.208285 | 3.079207  |
| 894 | 6 | 0 | 14.827604 | 0.221656  | 2.504566  |
| 895 | 1 | 0 | 13.185803 | -1.145956 | 2.147107  |
| 896 | 1 | 0 | 15.993080 | -3.697904 | 0.102539  |
| 897 | 6 | 0 | 14.564706 | -5.240460 | -0.316629 |
| 898 | 1 | 0 | 14.517681 | -1.943921 | 4.120808  |
| 899 | 1 | 0 | 14.390375 | -3.208898 | 2.831688  |
| 900 | 1 | 0 | 15.935375 | -2.278081 | 3.039086  |
| 901 | 1 | 0 | 15.946852 | 0.189992  | 2.590018  |

|     |   |   |           |            |           |
|-----|---|---|-----------|------------|-----------|
| 902 | 1 | 0 | 14.576779 | 0.962536   | 1.699498  |
| 903 | 6 | 0 | 15.104632 | -6.231996  | 0.730859  |
| 904 | 6 | 0 | 15.118299 | -5.664219  | -1.695013 |
| 905 | 1 | 0 | 13.473794 | -5.248773  | -0.327670 |
| 906 | 8 | 0 | 16.329909 | -6.307088  | 0.936928  |
| 907 | 7 | 0 | 14.184733 | -7.000738  | 1.355352  |
| 908 | 1 | 0 | 16.209019 | -5.723631  | -1.657624 |
| 909 | 1 | 0 | 14.728824 | -6.661353  | -1.935541 |
| 910 | 1 | 0 | 13.187655 | -6.850855  | 1.168372  |
| 911 | 6 | 0 | 14.606117 | -8.000807  | 2.344428  |
| 912 | 6 | 0 | 13.992655 | -9.383700  | 2.022122  |
| 913 | 6 | 0 | 14.336970 | -7.639255  | 3.790676  |
| 914 | 1 | 0 | 15.693871 | -8.076083  | 2.240930  |
| 915 | 8 | 0 | 12.784873 | -9.549363  | 1.793912  |
| 916 | 7 | 0 | 14.888951 | -10.395098 | 2.030565  |
| 917 | 6 | 0 | 12.898983 | -7.312796  | 4.126192  |
| 918 | 1 | 0 | 14.678580 | -8.504815  | 4.422849  |
| 919 | 1 | 0 | 14.985273 | -6.759638  | 4.062717  |
| 920 | 1 | 0 | 15.873898 | -10.175271 | 2.168993  |
| 921 | 6 | 0 | 14.489908 | -11.774372 | 1.785889  |
| 922 | 6 | 0 | 12.763517 | -7.065488  | 5.615228  |
| 923 | 1 | 0 | 12.564719 | -6.404928  | 3.557640  |
| 924 | 1 | 0 | 12.232641 | -8.160463  | 3.809200  |
| 925 | 1 | 0 | 15.363335 | -12.420140 | 1.907984  |
| 926 | 1 | 0 | 13.714687 | -12.086979 | 2.494449  |
| 927 | 1 | 0 | 14.095140 | -11.899961 | 0.770495  |
| 928 | 6 | 0 | 11.317853 | -6.735219  | 5.979577  |
| 929 | 1 | 0 | 13.096986 | -7.974269  | 6.182589  |
| 930 | 1 | 0 | 13.440512 | -6.221770  | 5.916942  |
| 931 | 7 | 0 | 11.133345 | -6.483073  | 7.388098  |
| 932 | 1 | 0 | 10.982964 | -5.865756  | 5.336043  |
| 933 | 1 | 0 | 10.665780 | -7.615678  | 5.704168  |
| 934 | 1 | 0 | 11.670184 | -5.694982  | 7.688470  |
| 935 | 1 | 0 | 10.166788 | -6.324471  | 7.590538  |
| 936 | 6 | 0 | 14.665464 | -4.719133  | -2.804322 |
| 937 | 1 | 0 | 16.639725 | -4.356568  | -3.340924 |
| 938 | 1 | 0 | 15.402665 | -3.526994  | -4.279386 |
| 939 | 7 | 0 | 15.659285 | -4.171365  | -3.542530 |
| 940 | 8 | 0 | 13.467657 | -4.486449  | -3.010618 |
| 941 | 6 | 0 | 14.228467 | 0.711593   | 3.798991  |
| 942 | 1 | 0 | 13.120668 | 0.564658   | 3.803509  |
| 943 | 1 | 0 | 14.658307 | 0.167923   | 4.674181  |
| 944 | 1 | 0 | 14.435242 | 1.804466   | 3.924989  |

|     |   |   |           |           |           |
|-----|---|---|-----------|-----------|-----------|
| 945 | 1 | 0 | 22.203693 | 5.093090  | 2.571093  |
| 946 | 7 | 0 | 21.281067 | 5.061562  | 2.978632  |
| 947 | 6 | 0 | 20.189693 | 4.661347  | 2.266125  |
| 948 | 1 | 0 | 21.151345 | 5.383983  | 3.928828  |
| 949 | 6 | 0 | 20.443616 | 4.227168  | 0.826991  |
| 950 | 8 | 0 | 19.059054 | 4.652499  | 2.758933  |
| 951 | 6 | 0 | 19.714771 | 5.154576  | -0.165142 |
| 952 | 1 | 0 | 20.058823 | 3.203163  | 0.742189  |
| 953 | 1 | 0 | 21.517678 | 4.195883  | 0.605591  |
| 954 | 6 | 0 | 19.825730 | 4.687047  | -1.632716 |
| 955 | 1 | 0 | 20.134205 | 6.165804  | -0.107641 |
| 956 | 1 | 0 | 18.657056 | 5.218916  | 0.109171  |
| 957 | 7 | 0 | 19.211255 | 5.650561  | -2.534442 |
| 958 | 6 | 0 | 19.112761 | 3.338551  | -1.824697 |
| 959 | 1 | 0 | 20.880850 | 4.618719  | -1.917471 |
| 960 | 6 | 0 | 19.959620 | 6.459436  | -3.329933 |
| 961 | 1 | 0 | 18.191856 | 5.762108  | -2.522821 |
| 962 | 8 | 0 | 17.886714 | 3.259869  | -1.683907 |
| 963 | 7 | 0 | 19.900514 | 2.282998  | -2.142236 |
| 964 | 6 | 0 | 19.142136 | 7.411300  | -4.237251 |
| 965 | 8 | 0 | 21.195577 | 6.467989  | -3.346201 |
| 966 | 1 | 0 | 20.903608 | 2.407317  | -2.206270 |
| 967 | 6 | 0 | 19.381165 | 0.916043  | -2.333428 |
| 968 | 7 | 0 | 19.792012 | 8.726103  | -4.162810 |
| 969 | 6 | 0 | 19.072948 | 6.819279  | -5.643191 |
| 970 | 1 | 0 | 18.122752 | 7.528062  | -3.854640 |
| 971 | 6 | 0 | 20.028767 | 0.032173  | -1.232162 |
| 972 | 6 | 0 | 19.703047 | 0.331118  | -3.705834 |
| 973 | 1 | 0 | 18.294604 | 0.964791  | -2.203900 |
| 974 | 1 | 0 | 20.801506 | 8.730004  | -4.244079 |
| 975 | 6 | 0 | 19.135522 | 9.861395  | -3.805339 |
| 976 | 6 | 0 | 18.310036 | 5.508007  | -5.604367 |
| 977 | 6 | 0 | 18.403347 | 7.776638  | -6.608507 |
| 978 | 1 | 0 | 20.121117 | 6.618172  | -6.006239 |
| 979 | 8 | 0 | 21.254109 | 0.020936  | -1.074168 |
| 980 | 7 | 0 | 19.141363 | -0.680372 | -0.487893 |
| 981 | 6 | 0 | 18.995174 | 1.105469  | -4.811261 |
| 982 | 6 | 0 | 19.292735 | -1.129049 | -3.736361 |
| 983 | 1 | 0 | 20.816461 | 0.392364  | -3.875580 |
| 984 | 6 | 0 | 19.995658 | 11.110531 | -3.684600 |
| 985 | 8 | 0 | 17.916609 | 9.902206  | -3.588932 |
| 986 | 1 | 0 | 18.065301 | 5.177070  | -6.642466 |
| 987 | 1 | 0 | 18.921063 | 4.708528  | -5.120206 |

|      |   |   |           |           |           |
|------|---|---|-----------|-----------|-----------|
| 988  | 1 | 0 | 17.356037 | 5.624163  | -5.031053 |
| 989  | 1 | 0 | 18.257259 | 7.280257  | -7.598601 |
| 990  | 1 | 0 | 17.405379 | 8.092519  | -6.217920 |
| 991  | 1 | 0 | 19.027784 | 8.687985  | -6.766542 |
| 992  | 1 | 0 | 18.135377 | -0.535396 | -0.623996 |
| 993  | 6 | 0 | 19.573823 | -1.523475 | 0.636309  |
| 994  | 6 | 0 | 19.610576 | 0.854587  | -6.164676 |
| 995  | 1 | 0 | 17.910121 | 0.815421  | -4.827914 |
| 996  | 1 | 0 | 19.035118 | 2.207071  | -4.599833 |
| 997  | 1 | 0 | 19.406223 | -1.539594 | -4.768499 |
| 998  | 1 | 0 | 19.936344 | -1.728282 | -3.047195 |
| 999  | 1 | 0 | 18.227034 | -1.246082 | -3.420721 |
| 1000 | 1 | 0 | 19.613926 | 11.864940 | -4.379761 |
| 1001 | 1 | 0 | 19.889785 | 11.511485 | -2.671589 |
| 1002 | 1 | 0 | 21.054979 | 10.932942 | -3.893592 |
| 1003 | 6 | 0 | 18.944835 | -2.917988 | 0.405359  |
| 1004 | 6 | 0 | 19.139666 | -1.014802 | 2.009431  |
| 1005 | 1 | 0 | 20.669088 | -1.559273 | 0.596507  |
| 1006 | 1 | 0 | 19.078249 | 1.454377  | -6.942543 |
| 1007 | 1 | 0 | 20.688248 | 1.148374  | -6.170397 |
| 1008 | 1 | 0 | 19.540196 | -0.223476 | -6.446919 |
| 1009 | 8 | 0 | 17.722231 | -3.042979 | 0.302672  |
| 1010 | 7 | 0 | 19.813326 | -3.957605 | 0.269166  |
| 1011 | 6 | 0 | 19.502310 | -2.034941 | 3.071276  |
| 1012 | 6 | 0 | 19.782231 | 0.330330  | 2.323715  |
| 1013 | 1 | 0 | 18.016562 | -0.890728 | 2.004054  |
| 1014 | 1 | 0 | 20.789251 | -3.825159 | 0.511985  |
| 1015 | 6 | 0 | 19.373420 | -5.337088 | 0.069210  |
| 1016 | 1 | 0 | 19.272959 | -1.625568 | 4.084863  |
| 1017 | 1 | 0 | 18.912708 | -2.973582 | 2.930846  |
| 1018 | 1 | 0 | 20.590126 | -2.284264 | 3.029753  |
| 1019 | 1 | 0 | 20.851020 | 0.168412  | 2.625078  |
| 1020 | 1 | 0 | 19.796330 | 0.972217  | 1.402888  |
| 1021 | 6 | 0 | 19.918786 | -6.191455 | 1.227772  |
| 1022 | 6 | 0 | 19.943962 | -5.910900 | -1.249770 |
| 1023 | 1 | 0 | 18.282701 | -5.339199 | 0.044469  |
| 1024 | 8 | 0 | 21.119218 | -6.124850 | 1.516696  |
| 1025 | 7 | 0 | 19.024788 | -7.013093 | 1.838143  |
| 1026 | 1 | 0 | 21.033799 | -5.988023 | -1.169439 |
| 1027 | 1 | 0 | 19.544382 | -6.921068 | -1.397462 |
| 1028 | 1 | 0 | 18.025415 | -6.919481 | 1.632708  |
| 1029 | 6 | 0 | 19.468973 | -7.871701 | 2.938626  |
| 1030 | 6 | 0 | 18.799358 | -9.262334 | 2.847497  |

|      |   |   |           |            |           |
|------|---|---|-----------|------------|-----------|
| 1031 | 6 | 0 | 19.264892 | -7.304999  | 4.332012  |
| 1032 | 1 | 0 | 20.553246 | -7.981569  | 2.801074  |
| 1033 | 8 | 0 | 17.635004 | -9.423480  | 2.464417  |
| 1034 | 7 | 0 | 19.581825 | -10.291336 | 3.258925  |
| 1035 | 6 | 0 | 17.827687 | -6.975736  | 4.672393  |
| 1036 | 1 | 0 | 19.660975 | -8.054204  | 5.070044  |
| 1037 | 1 | 0 | 19.889818 | -6.376597  | 4.436605  |
| 1038 | 1 | 0 | 20.540817 | -10.097794 | 3.513237  |
| 1039 | 6 | 0 | 19.099030 | -11.667067 | 3.326810  |
| 1040 | 6 | 0 | 17.708854 | -6.597229  | 6.134052  |
| 1041 | 1 | 0 | 17.464936 | -6.130028  | 4.029957  |
| 1042 | 1 | 0 | 17.170464 | -7.859489  | 4.448045  |
| 1043 | 1 | 0 | 19.810566 | -12.264527 | 3.902192  |
| 1044 | 1 | 0 | 18.124468 | -11.698480 | 3.823364  |
| 1045 | 1 | 0 | 18.994855 | -12.103010 | 2.326136  |
| 1046 | 6 | 0 | 16.256771 | -6.283264  | 6.489965  |
| 1047 | 1 | 0 | 18.080882 | -7.439206  | 6.775273  |
| 1048 | 1 | 0 | 18.356343 | -5.705962  | 6.344756  |
| 1049 | 1 | 0 | 15.902787 | -5.448086  | 5.812065  |
| 1050 | 1 | 0 | 15.619930 | -7.185706  | 6.252550  |
| 1051 | 6 | 0 | 19.525584 | -5.074037  | -2.454819 |
| 1052 | 1 | 0 | 21.504448 | -4.616603  | -2.906023 |
| 1053 | 1 | 0 | 20.306180 | -3.927250  | -3.963614 |
| 1054 | 7 | 0 | 20.539347 | -4.539514  | -3.191306 |
| 1055 | 8 | 0 | 18.341387 | -4.901860  | -2.749897 |
| 1056 | 6 | 0 | 19.048519 | 1.068410   | 3.414974  |
| 1057 | 1 | 0 | 17.953734 | 1.116655   | 3.195021  |
| 1058 | 1 | 0 | 19.185534 | 0.565186   | 4.402169  |
| 1059 | 1 | 0 | 19.431778 | 2.116290   | 3.494666  |
| 1060 | 7 | 0 | 16.071122 | -5.980179  | 7.887772  |
| 1061 | 1 | 0 | 16.630042 | -5.200026  | 8.168058  |
| 1062 | 1 | 0 | 15.108408 | -5.788350  | 8.079038  |

P PI (Ac-VQIINK-NHMe)<sub>10</sub>

|    |   |   |            |           |           |
|----|---|---|------------|-----------|-----------|
| 1  | 6 | 0 | -20.945441 | 9.979485  | 6.200256  |
| 2  | 6 | 0 | -21.597714 | 9.345937  | 4.977738  |
| 3  | 1 | 0 | -21.481479 | 10.904242 | 6.438478  |
| 4  | 1 | 0 | -21.070739 | 9.299402  | 7.049562  |
| 5  | 1 | 0 | -19.883197 | 10.191826 | 6.051386  |
| 6  | 8 | 0 | -22.798571 | 9.058618  | 4.952939  |
| 7  | 7 | 0 | -20.749607 | 9.126198  | 3.927897  |
| 8  | 1 | 0 | -19.756515 | 9.348685  | 4.015393  |
| 9  | 6 | 0 | -21.223056 | 8.478560  | 2.701000  |
| 10 | 6 | 0 | -20.652236 | 7.039995  | 2.679992  |
| 11 | 6 | 0 | -20.803654 | 9.182181  | 1.414873  |
| 12 | 1 | 0 | -22.317926 | 8.464778  | 2.769460  |
| 13 | 8 | 0 | -19.428984 | 6.853327  | 2.590876  |
| 14 | 7 | 0 | -21.550983 | 6.037974  | 2.809079  |
| 15 | 6 | 0 | -21.447395 | 8.495546  | 0.225466  |
| 16 | 6 | 0 | -21.181536 | 10.648681 | 1.432845  |
| 17 | 1 | 0 | -19.681318 | 9.098770  | 1.313737  |
| 18 | 1 | 0 | -22.539419 | 6.258134  | 2.848005  |
| 19 | 6 | 0 | -21.183221 | 4.622004  | 2.834628  |
| 20 | 1 | 0 | -21.106095 | 8.978101  | -0.721891 |
| 21 | 1 | 0 | -21.165128 | 7.414916  | 0.192354  |
| 22 | 1 | 0 | -22.560159 | 8.572415  | 0.279625  |
| 23 | 1 | 0 | -21.001214 | 11.099862 | 0.426869  |
| 24 | 1 | 0 | -22.260990 | 10.774235 | 1.689413  |
| 25 | 1 | 0 | -20.569648 | 11.207081 | 2.181247  |
| 26 | 6 | 0 | -21.862327 | 3.931186  | 1.634950  |
| 27 | 6 | 0 | -21.615866 | 3.972729  | 4.166160  |
| 28 | 1 | 0 | -20.097312 | 4.578839  | 2.730798  |
| 29 | 8 | 0 | -23.071341 | 4.067477  | 1.427959  |
| 30 | 7 | 0 | -21.030502 | 3.164188  | 0.874890  |
| 31 | 6 | 0 | -21.081712 | 2.540189  | 4.341097  |
| 32 | 1 | 0 | -21.238626 | 4.604613  | 4.980200  |
| 33 | 1 | 0 | -22.709002 | 3.961396  | 4.237660  |
| 34 | 1 | 0 | -20.022397 | 3.216511  | 1.033551  |
| 35 | 6 | 0 | -21.502192 | 2.462634  | -0.326723 |
| 36 | 6 | 0 | -21.539319 | 1.950619  | 5.677962  |
| 37 | 1 | 0 | -21.484648 | 1.891859  | 3.553182  |
| 38 | 1 | 0 | -19.988902 | 2.521308  | 4.260497  |
| 39 | 6 | 0 | -20.898811 | 1.038281  | -0.279211 |
| 40 | 6 | 0 | -21.095889 | 3.124765  | -1.643706 |
| 41 | 1 | 0 | -22.596962 | 2.440551  | -0.267862 |

|    |   |   |            |           |           |
|----|---|---|------------|-----------|-----------|
| 42 | 8 | 0 | -22.731571 | 1.874969  | 5.982304  |
| 43 | 7 | 0 | -20.535652 | 1.511213  | 6.492438  |
| 44 | 8 | 0 | -19.677541 | 0.886444  | -0.132227 |
| 45 | 7 | 0 | -21.773885 | 0.011500  | -0.390613 |
| 46 | 6 | 0 | -21.826058 | 4.449281  | -1.830068 |
| 47 | 6 | 0 | -21.384531 | 2.193907  | -2.804828 |
| 48 | 1 | 0 | -19.983963 | 3.320761  | -1.616999 |
| 49 | 1 | 0 | -20.805116 | 1.160543  | 7.401561  |
| 50 | 1 | 0 | -19.550376 | 1.654884  | 6.279827  |
| 51 | 1 | 0 | -22.759426 | 0.202286  | -0.529711 |
| 52 | 6 | 0 | -21.363712 | -1.407144 | -0.390346 |
| 53 | 6 | 0 | -21.102078 | 5.361332  | -2.787569 |
| 54 | 1 | 0 | -22.863393 | 4.248247  | -2.208655 |
| 55 | 1 | 0 | -21.937086 | 4.971425  | -0.842026 |
| 56 | 1 | 0 | -21.223517 | 2.726926  | -3.773262 |
| 57 | 1 | 0 | -20.702089 | 1.309134  | -2.775250 |
| 58 | 1 | 0 | -22.441096 | 1.832457  | -2.776649 |
| 59 | 6 | 0 | -21.951473 | -2.034805 | -1.683549 |
| 60 | 6 | 0 | -21.870952 | -2.198152 | 0.812022  |
| 61 | 1 | 0 | -20.269818 | -1.422494 | -0.400550 |
| 62 | 1 | 0 | -21.644709 | 6.333788  | -2.874207 |
| 63 | 1 | 0 | -20.063664 | 5.567104  | -2.429319 |
| 64 | 1 | 0 | -21.036848 | 4.904391  | -3.804547 |
| 65 | 8 | 0 | -23.170177 | -2.050951 | -1.870889 |
| 66 | 7 | 0 | -21.020642 | -2.499435 | -2.562752 |
| 67 | 6 | 0 | -21.503927 | -3.659849 | 0.631719  |
| 68 | 6 | 0 | -21.291015 | -1.663546 | 2.115348  |
| 69 | 1 | 0 | -22.995077 | -2.113969 | 0.851384  |
| 70 | 1 | 0 | -20.036696 | -2.491690 | -2.289250 |
| 71 | 6 | 0 | -21.386823 | -3.093080 | -3.836169 |
| 72 | 1 | 0 | -21.780438 | -4.239504 | 1.544750  |
| 73 | 1 | 0 | -22.050475 | -4.094478 | -0.240411 |
| 74 | 1 | 0 | -20.405818 | -3.770901 | 0.456586  |
| 75 | 1 | 0 | -20.232687 | -2.023780 | 2.223777  |
| 76 | 1 | 0 | -21.251704 | -0.542226 | 2.092794  |
| 77 | 6 | 0 | -20.951376 | -4.566793 | -3.895523 |
| 78 | 6 | 0 | -20.701825 | -2.385424 | -5.029692 |
| 79 | 1 | 0 | -22.471962 | -2.994475 | -3.932377 |
| 80 | 8 | 0 | -19.876465 | -4.943982 | -3.404735 |
| 81 | 7 | 0 | -21.790574 | -5.386557 | -4.576179 |
| 82 | 1 | 0 | -19.614618 | -2.446650 | -4.929553 |
| 83 | 1 | 0 | -20.991797 | -2.898183 | -5.955492 |
| 84 | 1 | 0 | -22.587138 | -4.979267 | -5.054515 |

|     |   |   |            |            |           |
|-----|---|---|------------|------------|-----------|
| 85  | 6 | 0 | -21.399423 | -6.731933  | -5.016861 |
| 86  | 6 | 0 | -21.249280 | -6.714371  | -6.562747 |
| 87  | 6 | 0 | -22.373598 | -7.822920  | -4.619776 |
| 88  | 1 | 0 | -20.432489 | -6.948002  | -4.546284 |
| 89  | 8 | 0 | -22.053451 | -6.102187  | -7.272417 |
| 90  | 7 | 0 | -20.197364 | -7.435812  | -7.027999 |
| 91  | 6 | 0 | -23.803003 | -7.558966  | -5.043298 |
| 92  | 1 | 0 | -22.013373 | -8.781935  | -5.081528 |
| 93  | 1 | 0 | -22.336471 | -7.955569  | -3.504098 |
| 94  | 1 | 0 | -19.495696 | -7.752608  | -6.359076 |
| 95  | 6 | 0 | -19.903809 | -7.530227  | -8.449385 |
| 96  | 6 | 0 | -24.658605 | -8.793341  | -4.853092 |
| 97  | 1 | 0 | -24.229223 | -6.714279  | -4.439881 |
| 98  | 1 | 0 | -23.824880 | -7.241471  | -6.121066 |
| 99  | 1 | 0 | -19.622223 | -8.557151  | -8.710682 |
| 100 | 1 | 0 | -20.798643 | -7.245716  | -9.007182 |
| 101 | 1 | 0 | -19.086089 | -6.856148  | -8.739609 |
| 102 | 6 | 0 | -26.099269 | -8.501290  | -5.270013 |
| 103 | 1 | 0 | -24.249935 | -9.638458  | -5.466494 |
| 104 | 1 | 0 | -24.625660 | -9.113099  | -3.778576 |
| 105 | 7 | 0 | -26.977498 | -9.639819  | -5.134227 |
| 106 | 1 | 0 | -26.458978 | -7.606712  | -4.677744 |
| 107 | 1 | 0 | -26.107010 | -8.200109  | -6.356898 |
| 108 | 1 | 0 | -26.909643 | -10.038762 | -4.219140 |
| 109 | 1 | 0 | -27.925094 | -9.366661  | -5.302424 |
| 110 | 8 | 0 | -17.951439 | 9.827945   | 4.359136  |
| 111 | 6 | 0 | -16.710460 | 9.864673   | 4.371309  |
| 112 | 7 | 0 | -15.925273 | 9.228041   | 3.464771  |
| 113 | 6 | 0 | -15.962939 | 10.632031  | 5.452260  |
| 114 | 6 | 0 | -16.482106 | 8.429949   | 2.362939  |
| 115 | 1 | 0 | -14.912325 | 9.358374   | 3.508325  |
| 116 | 1 | 0 | -16.353141 | 11.654506  | 5.482903  |
| 117 | 1 | 0 | -16.184379 | 10.166553  | 6.419161  |
| 118 | 1 | 0 | -14.882570 | 10.646733  | 5.288791  |
| 119 | 6 | 0 | -15.854084 | 7.016669   | 2.441506  |
| 120 | 6 | 0 | -16.204580 | 9.000740   | 0.973493  |
| 121 | 1 | 0 | -17.565170 | 8.376493   | 2.517527  |
| 122 | 7 | 0 | -16.726910 | 5.993443   | 2.554064  |
| 123 | 8 | 0 | -14.618951 | 6.880327   | 2.413821  |
| 124 | 6 | 0 | -16.848629 | 8.117496   | -0.077860 |
| 125 | 6 | 0 | -16.725907 | 10.417369  | 0.847026  |
| 126 | 1 | 0 | -15.088149 | 9.008192   | 0.803707  |
| 127 | 1 | 0 | -17.732088 | 6.195159   | 2.573078  |



|     |   |   |            |           |           |
|-----|---|---|------------|-----------|-----------|
| 128 | 6 | 0 | -16.296084 | 4.600076  | 2.664931  |
| 129 | 1 | 0 | -16.718493 | 8.570698  | -1.089964 |
| 130 | 1 | 0 | -16.378223 | 7.104039  | -0.083497 |
| 131 | 1 | 0 | -17.942059 | 8.001121  | 0.123308  |
| 132 | 1 | 0 | -16.623891 | 10.769097 | -0.208271 |
| 133 | 1 | 0 | -17.804769 | 10.465086 | 1.134820  |
| 134 | 1 | 0 | -16.151592 | 11.113513 | 1.503793  |
| 135 | 6 | 0 | -16.996980 | 3.783852  | 1.561592  |
| 136 | 6 | 0 | -16.638879 | 4.030031  | 4.055958  |
| 137 | 1 | 0 | -15.215693 | 4.584253  | 2.509389  |
| 138 | 8 | 0 | -18.232176 | 3.689726  | 1.539917  |
| 139 | 7 | 0 | -16.171881 | 3.194170  | 0.664328  |
| 140 | 6 | 0 | -16.129483 | 2.589719  | 4.251956  |
| 141 | 1 | 0 | -16.188274 | 4.688435  | 4.808820  |
| 142 | 1 | 0 | -17.723702 | 4.054356  | 4.201720  |
| 143 | 1 | 0 | -15.162182 | 3.330197  | 0.752315  |
| 144 | 6 | 0 | -16.679249 | 2.392862  | -0.461937 |
| 145 | 6 | 0 | -16.540592 | 2.047630  | 5.617389  |
| 146 | 1 | 0 | -16.584304 | 1.929635  | 3.502594  |
| 147 | 1 | 0 | -15.041922 | 2.542548  | 4.130601  |
| 148 | 6 | 0 | -16.078257 | 0.970741  | -0.318301 |
| 149 | 6 | 0 | -16.306227 | 2.939901  | -1.838879 |
| 150 | 1 | 0 | -17.770005 | 2.360318  | -0.368956 |
| 151 | 8 | 0 | -17.731366 | 1.916862  | 5.931058  |
| 152 | 7 | 0 | -15.524717 | 1.723072  | 6.455237  |
| 153 | 8 | 0 | -14.845379 | 0.813990  | -0.324507 |
| 154 | 7 | 0 | -16.974944 | -0.027175 | -0.170488 |
| 155 | 6 | 0 | -16.836783 | 4.353581  | -2.038400 |
| 156 | 6 | 0 | -16.856071 | 2.013667  | -2.907469 |
| 157 | 1 | 0 | -15.180421 | 2.959619  | -1.922109 |
| 158 | 1 | 0 | -15.770327 | 1.387361  | 7.376967  |
| 159 | 1 | 0 | -14.544451 | 1.856133  | 6.205246  |
| 160 | 1 | 0 | -17.974645 | 0.196741  | -0.154801 |
| 161 | 6 | 0 | -16.571460 | -1.434569 | -0.006254 |
| 162 | 6 | 0 | -16.245605 | 5.018982  | -3.255735 |
| 163 | 1 | 0 | -17.955779 | 4.319554  | -2.130015 |
| 164 | 1 | 0 | -16.598823 | 4.983912  | -1.140523 |
| 165 | 1 | 0 | -16.601458 | 2.402660  | -3.922616 |
| 166 | 1 | 0 | -16.418097 | 0.990534  | -2.807269 |
| 167 | 1 | 0 | -17.967985 | 1.933346  | -2.825501 |
| 168 | 6 | 0 | -17.147906 | -2.226178 | -1.209654 |
| 169 | 6 | 0 | -17.086731 | -2.083664 | 1.276590  |
| 170 | 1 | 0 | -15.477217 | -1.463716 | -0.014651 |

|     |   |   |            |            |           |
|-----|---|---|------------|------------|-----------|
| 171 | 1 | 0 | -16.570007 | 6.087097   | -3.301656 |
| 172 | 1 | 0 | -15.129051 | 4.991001   | -3.218461 |
| 173 | 1 | 0 | -16.578266 | 4.513991   | -4.194392 |
| 174 | 8 | 0 | -18.369268 | -2.256115  | -1.409256 |
| 175 | 7 | 0 | -16.234169 | -2.835089  | -2.003483 |
| 176 | 6 | 0 | -16.665878 | -3.541694  | 1.295035  |
| 177 | 6 | 0 | -16.568953 | -1.364196  | 2.514507  |
| 178 | 1 | 0 | -18.215017 | -2.034287  | 1.273788  |
| 179 | 1 | 0 | -15.244607 | -2.791719  | -1.745659 |
| 180 | 6 | 0 | -16.622188 | -3.609357  | -3.177420 |
| 181 | 1 | 0 | -16.960096 | -4.014500  | 2.262440  |
| 182 | 1 | 0 | -17.163510 | -4.102385  | 0.466658  |
| 183 | 1 | 0 | -15.558617 | -3.632831  | 1.174283  |
| 184 | 1 | 0 | -15.474118 | -1.581854  | 2.637076  |
| 185 | 1 | 0 | -16.672431 | -0.254048  | 2.385342  |
| 186 | 6 | 0 | -16.189375 | -5.075920  | -2.993945 |
| 187 | 6 | 0 | -15.959615 | -3.066106  | -4.462465 |
| 188 | 1 | 0 | -17.707901 | -3.541139  | -3.263852 |
| 189 | 8 | 0 | -15.000787 | -5.359177  | -2.766696 |
| 190 | 7 | 0 | -17.175009 | -5.992715  | -3.129213 |
| 191 | 1 | 0 | -14.872850 | -3.161490  | -4.396866 |
| 192 | 1 | 0 | -16.308876 | -3.664838  | -5.313213 |
| 193 | 1 | 0 | -18.142923 | -5.681717  | -3.255489 |
| 194 | 6 | 0 | -16.897446 | -7.431302  | -3.019348 |
| 195 | 6 | 0 | -17.136252 | -8.127717  | -4.383050 |
| 196 | 6 | 0 | -17.675776 | -8.138055  | -1.928791 |
| 197 | 1 | 0 | -15.832381 | -7.511366  | -2.767637 |
| 198 | 8 | 0 | -18.203072 | -8.015964  | -5.006694 |
| 199 | 7 | 0 | -16.097093 | -8.865904  | -4.827528 |
| 200 | 6 | 0 | -19.181253 | -8.073847  | -2.066303 |
| 201 | 1 | 0 | -17.348722 | -9.213843  | -1.923647 |
| 202 | 1 | 0 | -17.379834 | -7.697918  | -0.936429 |
| 203 | 1 | 0 | -15.206840 | -8.839638  | -4.328891 |
| 204 | 6 | 0 | -16.165956 | -9.584190  | -6.091547 |
| 205 | 6 | 0 | -19.842433 | -8.793194  | -0.908560 |
| 206 | 1 | 0 | -19.527972 | -7.005292  | -2.095045 |
| 207 | 1 | 0 | -19.490433 | -8.541857  | -3.039608 |
| 208 | 1 | 0 | -15.284762 | -10.225678 | -6.177638 |
| 209 | 1 | 0 | -17.068407 | -10.203234 | -6.132942 |
| 210 | 1 | 0 | -16.189530 | -8.895413  | -6.946130 |
| 211 | 6 | 0 | -21.359438 | -8.805004  | -1.085051 |
| 212 | 1 | 0 | -19.461618 | -9.846132  | -0.844978 |
| 213 | 1 | 0 | -19.571196 | -8.281372  | 0.052255  |

|     |   |   |            |           |           |
|-----|---|---|------------|-----------|-----------|
| 214 | 7 | 0 | -22.059767 | -9.435146 | 0.010005  |
| 215 | 1 | 0 | -21.699298 | -7.739766 | -1.259262 |
| 216 | 1 | 0 | -21.608736 | -9.388389 | -2.018256 |
| 217 | 1 | 0 | -21.768527 | -9.055162 | 0.888678  |
| 218 | 1 | 0 | -23.046535 | -9.304044 | -0.090931 |
| 219 | 8 | 0 | -13.585691 | -2.509959 | -0.999603 |
| 220 | 6 | 0 | -12.360314 | -2.427105 | -0.840473 |
| 221 | 6 | 0 | -11.775806 | -1.467926 | 0.226927  |
| 222 | 7 | 0 | -11.451318 | -3.110057 | -1.575469 |
| 223 | 7 | 0 | -12.163812 | -0.098856 | -0.157468 |
| 224 | 6 | 0 | -12.298531 | -1.897523 | 1.596731  |
| 225 | 1 | 0 | -10.681819 | -1.509479 | 0.225867  |
| 226 | 1 | 0 | -10.458366 | -3.023027 | -1.341218 |
| 227 | 6 | 0 | -11.841968 | -4.039617 | -2.630782 |
| 228 | 6 | 0 | -11.254146 | 0.875860  | -0.367955 |
| 229 | 1 | 0 | -13.162962 | 0.130713  | -0.197465 |
| 230 | 6 | 0 | -11.866061 | -3.325783 | 1.869183  |
| 231 | 6 | 0 | -11.798773 | -0.971309 | 2.696969  |
| 232 | 1 | 0 | -13.427281 | -1.860900 | 1.575487  |
| 233 | 6 | 0 | -11.368441 | -5.454226 | -2.255099 |
| 234 | 6 | 0 | -11.198238 | -3.662798 | -3.983293 |
| 235 | 1 | 0 | -12.929705 | -4.008699 | -2.711295 |
| 236 | 6 | 0 | -11.836570 | 2.282781  | -0.660338 |
| 237 | 8 | 0 | -10.023611 | 0.714030  | -0.311864 |
| 238 | 1 | 0 | -12.205501 | -3.639509 | 2.885480  |
| 239 | 1 | 0 | -12.315341 | -4.020092 | 1.118080  |
| 240 | 1 | 0 | -10.753430 | -3.416539 | 1.819787  |
| 241 | 1 | 0 | -10.695796 | -1.127719 | 2.838957  |
| 242 | 1 | 0 | -11.943493 | 0.097823  | 2.387395  |
| 243 | 8 | 0 | -10.171261 | -5.660645 | -1.992657 |
| 244 | 7 | 0 | -12.316115 | -6.420030 | -2.262199 |
| 245 | 1 | 0 | -10.110908 | -3.752100 | -3.922146 |
| 246 | 1 | 0 | -11.560845 | -4.361793 | -4.747627 |
| 247 | 7 | 0 | -11.335672 | 3.176358  | 0.398279  |
| 248 | 6 | 0 | -11.430759 | 2.701035  | -2.071800 |
| 249 | 1 | 0 | -12.929303 | 2.268266  | -0.586099 |
| 250 | 1 | 0 | -13.294749 | -6.169952 | -2.432387 |
| 251 | 6 | 0 | -11.962211 | -7.803954 | -1.923893 |
| 252 | 6 | 0 | -12.160545 | 3.834258  | 1.244863  |
| 253 | 1 | 0 | -10.324828 | 3.306253  | 0.487329  |
| 254 | 6 | 0 | -12.018857 | 4.058839  | -2.432934 |
| 255 | 6 | 0 | -11.892235 | 1.643379  | -3.056762 |
| 256 | 1 | 0 | -10.304648 | 2.767407  | -2.117420 |

|     |   |   |            |            |           |
|-----|---|---|------------|------------|-----------|
| 257 | 6 | 0 | -12.417252 | -8.772277  | -3.038301 |
| 258 | 6 | 0 | -12.473897 | -8.285888  | -0.582096 |
| 259 | 1 | 0 | -10.867628 | -7.825795  | -1.870409 |
| 260 | 6 | 0 | -11.459879 | 4.711126   | 2.301551  |
| 261 | 8 | 0 | -13.397083 | 3.755464   | 1.215017  |
| 262 | 6 | 0 | -11.368315 | 4.655425   | -3.655425 |
| 263 | 1 | 0 | -13.123317 | 3.948316   | -2.605484 |
| 264 | 1 | 0 | -11.889858 | 4.773486   | -1.576857 |
| 265 | 1 | 0 | -11.663332 | 1.962749   | -4.101741 |
| 266 | 1 | 0 | -11.369130 | 0.674513   | -2.864834 |
| 267 | 1 | 0 | -12.993597 | 1.476363   | -2.967980 |
| 268 | 8 | 0 | -13.566849 | -8.761016  | -3.503215 |
| 269 | 7 | 0 | -11.461134 | -9.638583  | -3.438721 |
| 270 | 6 | 0 | -13.973120 | -8.211999  | -0.397417 |
| 271 | 1 | 0 | -12.134124 | -9.350169  | -0.452944 |
| 272 | 1 | 0 | -11.973804 | -7.679807  | 0.223896  |
| 273 | 6 | 0 | -11.780753 | 4.207499   | 3.723642  |
| 274 | 7 | 0 | -11.909899 | 6.090851   | 2.133156  |
| 275 | 1 | 0 | -10.381224 | 4.699535   | 2.133783  |
| 276 | 1 | 0 | -11.765564 | 5.683886   | -3.835738 |
| 277 | 1 | 0 | -10.261085 | 4.723791   | -3.520159 |
| 278 | 1 | 0 | -11.572816 | 4.039103   | -4.563798 |
| 279 | 1 | 0 | -10.516331 | -9.539021  | -3.065219 |
| 280 | 6 | 0 | -11.717507 | -10.648189 | -4.454958 |
| 281 | 6 | 0 | -14.357078 | -8.804484  | 0.943173  |
| 282 | 1 | 0 | -14.319007 | -7.145886  | -0.457456 |
| 283 | 1 | 0 | -14.485184 | -8.768694  | -1.228092 |
| 284 | 6 | 0 | -11.230902 | 2.794246   | 3.997431  |
| 285 | 1 | 0 | -11.344119 | 4.918731   | 4.435498  |
| 286 | 1 | 0 | -12.865325 | 4.213763   | 3.874379  |
| 287 | 6 | 0 | -11.058555 | 7.106072   | 1.875048  |
| 288 | 1 | 0 | -12.911819 | 6.289291   | 2.230541  |
| 289 | 1 | 0 | -10.938708 | -11.413961 | -4.398499 |
| 290 | 1 | 0 | -12.693074 | -11.113885 | -4.284529 |
| 291 | 1 | 0 | -11.717211 | -10.216857 | -5.464852 |
| 292 | 6 | 0 | -15.865200 | -8.705984  | 1.160496  |
| 293 | 1 | 0 | -14.036383 | -9.878539  | 0.988543  |
| 294 | 1 | 0 | -13.813070 | -8.262213  | 1.761962  |
| 295 | 6 | 0 | -11.623916 | 2.314703   | 5.390614  |
| 296 | 1 | 0 | -11.666818 | 2.081040   | 3.286712  |
| 297 | 1 | 0 | -10.142590 | 2.774330   | 3.876291  |
| 298 | 6 | 0 | -11.708528 | 8.505125   | 1.746591  |
| 299 | 8 | 0 | -9.828162  | 6.973972   | 1.759138  |

|     |   |   |            |           |           |
|-----|---|---|------------|-----------|-----------|
| 300 | 7 | 0 | -16.299623 | -9.278798 | 2.412286  |
| 301 | 1 | 0 | -16.163325 | -7.619024 | 1.054684  |
| 302 | 1 | 0 | -16.386244 | -9.271073 | 0.333590  |
| 303 | 7 | 0 | -10.606248 | 2.129591  | 6.264298  |
| 304 | 8 | 0 | -12.809406 | 2.114249  | 5.694775  |
| 305 | 7 | 0 | -11.109812 | 9.370516  | 2.773116  |
| 306 | 6 | 0 | -11.505942 | 9.000008  | 0.316296  |
| 307 | 1 | 0 | -12.781705 | 8.448276  | 1.959736  |
| 308 | 1 | 0 | -15.807667 | -8.874829 | 3.183776  |
| 309 | 1 | 0 | -17.281851 | -9.136715 | 2.537127  |
| 310 | 1 | 0 | -9.630722  | 2.300061  | 6.014901  |
| 311 | 1 | 0 | -10.843511 | 1.836189  | 7.202603  |
| 312 | 6 | 0 | -11.855675 | 10.007453 | 3.711592  |
| 313 | 1 | 0 | -10.100721 | 9.532166  | 2.746995  |
| 314 | 6 | 0 | -12.179649 | 8.048873  | -0.654281 |
| 315 | 6 | 0 | -12.061559 | 10.397443 | 0.134248  |
| 316 | 1 | 0 | -10.398699 | 9.016046  | 0.094817  |
| 317 | 6 | 0 | -11.068367 | 10.849953 | 4.704583  |
| 318 | 8 | 0 | -13.091709 | 9.917422  | 3.790642  |
| 319 | 1 | 0 | -12.073990 | 8.431594  | -1.697909 |
| 320 | 1 | 0 | -11.713313 | 7.034885  | -0.602439 |
| 321 | 1 | 0 | -13.268008 | 7.953359  | -0.418919 |
| 322 | 1 | 0 | -12.002980 | 10.694009 | -0.941132 |
| 323 | 1 | 0 | -13.130996 | 10.437793 | 0.455782  |
| 324 | 1 | 0 | -11.481261 | 11.139289 | 0.732982  |
| 325 | 1 | 0 | -11.484398 | 11.862780 | 4.705102  |
| 326 | 1 | 0 | -11.218920 | 10.432105 | 5.706099  |
| 327 | 1 | 0 | -10.000549 | 10.884193 | 4.474910  |
| 328 | 1 | 0 | 9.935631   | 4.232860  | 4.535549  |
| 329 | 7 | 0 | 8.977313   | 4.169997  | 4.882221  |
| 330 | 6 | 0 | 7.915549   | 3.992247  | 4.062272  |
| 331 | 1 | 0 | 8.794502   | 4.253183  | 5.873541  |
| 332 | 6 | 0 | 8.226164   | 3.899226  | 2.572366  |
| 333 | 8 | 0 | 6.751994   | 3.911077  | 4.484821  |
| 334 | 6 | 0 | 7.583838   | 5.066735  | 1.798530  |
| 335 | 1 | 0 | 7.807558   | 2.945938  | 2.225764  |
| 336 | 1 | 0 | 9.308184   | 3.874067  | 2.404799  |
| 337 | 6 | 0 | 7.804717   | 4.969063  | 0.275075  |
| 338 | 1 | 0 | 8.016066   | 6.015945  | 2.137906  |
| 339 | 1 | 0 | 6.509910   | 5.100004  | 2.009670  |
| 340 | 7 | 0 | 7.298359   | 6.163153  | -0.397341 |
| 341 | 6 | 0 | 7.082035   | 3.737632  | -0.303131 |
| 342 | 1 | 0 | 8.872384   | 4.905549  | 0.057523  |

|     |   |   |          |           |           |
|-----|---|---|----------|-----------|-----------|
| 343 | 6 | 0 | 8.109142 | 7.012598  | -1.064630 |
| 344 | 1 | 0 | 6.294503 | 6.367152  | -0.344827 |
| 345 | 8 | 0 | 5.847480 | 3.648125  | -0.234601 |
| 346 | 7 | 0 | 7.883261 | 2.800596  | -0.858068 |
| 347 | 6 | 0 | 7.413339 | 8.245249  | -1.690283 |
| 348 | 8 | 0 | 9.337903 | 6.859159  | -1.173998 |
| 349 | 1 | 0 | 8.893888 | 2.958370  | -0.874739 |
| 350 | 6 | 0 | 7.360207 | 1.556508  | -1.448210 |
| 351 | 7 | 0 | 8.031766 | 9.445958  | -1.110991 |
| 352 | 6 | 0 | 7.534763 | 8.148290  | -3.209256 |
| 353 | 1 | 0 | 6.352961 | 8.264821  | -1.415112 |
| 354 | 6 | 0 | 7.971026 | 0.386060  | -0.634845 |
| 355 | 6 | 0 | 7.715098 | 1.370262  | -2.921897 |
| 356 | 1 | 0 | 6.270847 | 1.573622  | -1.335913 |
| 357 | 1 | 0 | 9.034113 | 9.592104  | -1.248460 |
| 358 | 6 | 0 | 7.310322 | 10.389414 | -0.453057 |
| 359 | 6 | 0 | 6.841496 | 6.890421  | -3.697063 |
| 360 | 6 | 0 | 6.932467 | 9.361770  | -3.887067 |
| 361 | 1 | 0 | 8.629232 | 8.085118  | -3.479824 |
| 362 | 8 | 0 | 9.204812 | 0.253225  | -0.572229 |
| 363 | 7 | 0 | 7.082561 | -0.412700 | -0.007680 |
| 364 | 6 | 0 | 7.118128 | 2.480870  | -3.776192 |
| 365 | 6 | 0 | 7.214570 | 0.015161  | -3.385778 |
| 366 | 1 | 0 | 8.838932 | 1.393652  | -3.026904 |
| 367 | 6 | 0 | 8.115324 | 11.560705 | 0.089850  |
| 368 | 8 | 0 | 6.082680 | 10.323457 | -0.278862 |
| 369 | 1 | 0 | 6.878689 | 6.842782  | -4.812009 |
| 370 | 1 | 0 | 7.342614 | 5.979073  | -3.288930 |
| 371 | 1 | 0 | 5.771036 | 6.883050  | -3.375832 |
| 372 | 1 | 0 | 6.931777 | 9.218710  | -4.994933 |
| 373 | 1 | 0 | 5.878794 | 9.515714  | -3.548394 |
| 374 | 1 | 0 | 7.519564 | 10.281966 | -3.654409 |
| 375 | 1 | 0 | 6.080412 | -0.211146 | -0.094118 |
| 376 | 6 | 0 | 7.497865 | -1.514137 | 0.879571  |
| 377 | 6 | 0 | 7.701450 | 2.511603  | -5.166218 |
| 378 | 1 | 0 | 6.005082 | 2.341892  | -3.835072 |
| 379 | 1 | 0 | 7.300284 | 3.477577  | -3.292913 |
| 380 | 1 | 0 | 7.421249 | -0.120899 | -4.474419 |
| 381 | 1 | 0 | 7.729154 | -0.805034 | -2.827589 |
| 382 | 1 | 0 | 6.113562 | -0.076112 | -3.217600 |
| 383 | 1 | 0 | 7.680414 | 12.488116 | -0.297067 |
| 384 | 1 | 0 | 8.008182 | 11.577473 | 1.179922  |
| 385 | 1 | 0 | 9.173450 | 11.505453 | -0.177480 |

|     |   |   |          |            |           |
|-----|---|---|----------|------------|-----------|
| 386 | 6 | 0 | 6.880131 | -2.818973  | 0.314543  |
| 387 | 6 | 0 | 7.031651 | -1.352530  | 2.325575  |
| 388 | 1 | 0 | 8.591441 | -1.559832  | 0.852047  |
| 389 | 1 | 0 | 7.299589 | 3.389229   | -5.728805 |
| 390 | 1 | 0 | 8.814792 | 2.598612   | -5.126235 |
| 391 | 1 | 0 | 7.442290 | 1.586142   | -5.734657 |
| 392 | 8 | 0 | 5.650149 | -2.952852  | 0.256788  |
| 393 | 7 | 0 | 7.767442 | -3.744340  | -0.120971 |
| 394 | 6 | 0 | 7.492221 | -2.550036  | 3.134845  |
| 395 | 6 | 0 | 7.557912 | -0.062023  | 2.938480  |
| 396 | 1 | 0 | 5.902349 | -1.324417  | 2.335062  |
| 397 | 1 | 0 | 8.768309 | -3.570567  | 0.006123  |
| 398 | 6 | 0 | 7.349433 | -5.024834  | -0.684568 |
| 399 | 1 | 0 | 7.185681 | -2.429562  | 4.201671  |
| 400 | 1 | 0 | 7.032475 | -3.488801  | 2.740649  |
| 401 | 1 | 0 | 8.604146 | -2.650635  | 3.091747  |
| 402 | 1 | 0 | 8.668996 | -0.145313  | 3.078792  |
| 403 | 1 | 0 | 7.376703 | 0.793057   | 2.234351  |
| 404 | 6 | 0 | 7.873273 | -6.160629  | 0.212018  |
| 405 | 6 | 0 | 7.924509 | -5.232947  | -2.102853 |
| 406 | 1 | 0 | 6.259073 | -5.031175  | -0.715088 |
| 407 | 8 | 0 | 9.090752 | -6.253818  | 0.444803  |
| 408 | 7 | 0 | 6.946439 | -7.026769  | 0.682544  |
| 409 | 1 | 0 | 9.015543 | -5.279930  | -2.064703 |
| 410 | 1 | 0 | 7.551658 | -6.188559  | -2.492885 |
| 411 | 1 | 0 | 5.953623 | -6.854779  | 0.497287  |
| 412 | 6 | 0 | 7.354463 | -8.153345  | 1.530267  |
| 413 | 6 | 0 | 6.788204 | -9.487472  | 0.991942  |
| 414 | 6 | 0 | 7.027517 | -8.009437  | 3.002282  |
| 415 | 1 | 0 | 8.447487 | -8.193220  | 1.460640  |
| 416 | 8 | 0 | 5.595071 | -9.642123  | 0.686515  |
| 417 | 7 | 0 | 7.709699 | -10.472321 | 0.908724  |
| 418 | 6 | 0 | 5.570777 | -7.775808  | 3.334456  |
| 419 | 1 | 0 | 7.380567 | -8.944705  | 3.518144  |
| 420 | 1 | 0 | 7.636927 | -7.156869  | 3.414461  |
| 421 | 1 | 0 | 8.684505 | -10.251685 | 1.114267  |
| 422 | 6 | 0 | 7.360199 | -11.813829 | 0.464539  |
| 423 | 6 | 0 | 5.391426 | -7.737059  | 4.839135  |
| 424 | 1 | 0 | 5.220133 | -6.809958  | 2.883344  |
| 425 | 1 | 0 | 4.941911 | -8.592434  | 2.887007  |
| 426 | 1 | 0 | 8.211798 | -12.476235 | 0.641167  |
| 427 | 1 | 0 | 6.494640 | -12.189050 | 1.020982  |
| 428 | 1 | 0 | 7.112506 | -11.832026 | -0.604425 |

|     |   |   |            |           |           |
|-----|---|---|------------|-----------|-----------|
| 429 | 6 | 0 | 3.929914   | -7.493530 | 5.206954  |
| 430 | 1 | 0 | 5.736831   | -8.706353 | 5.286519  |
| 431 | 1 | 0 | 6.037038   | -6.925662 | 5.270844  |
| 432 | 7 | 0 | 3.702628   | -7.453081 | 6.631457  |
| 433 | 1 | 0 | 3.590313   | -6.546209 | 4.687775  |
| 434 | 1 | 0 | 3.306062   | -8.337749 | 4.789542  |
| 435 | 1 | 0 | 4.237078   | -6.726422 | 7.062815  |
| 436 | 1 | 0 | 2.731598   | -7.310913 | 6.824839  |
| 437 | 6 | 0 | -21.162570 | -0.930856 | -5.163547 |
| 438 | 6 | 0 | -16.362866 | -1.616365 | -4.730822 |
| 439 | 6 | 0 | -11.599706 | -2.257929 | -4.425560 |
| 440 | 6 | 0 | 7.464639   | -4.140137 | -3.063831 |
| 441 | 1 | 0 | 9.436024   | -3.675031 | -3.524072 |
| 442 | 1 | 0 | 8.185073   | -2.726599 | -4.331937 |
| 443 | 7 | 0 | 8.450931   | -3.476092 | -3.706025 |
| 444 | 8 | 0 | 6.262045   | -3.897776 | -3.240351 |
| 445 | 1 | 0 | -9.603213  | -1.704356 | -4.567529 |
| 446 | 1 | 0 | -10.802283 | -0.471016 | -4.969050 |
| 447 | 1 | 0 | -14.366795 | -1.037785 | -4.737836 |
| 448 | 1 | 0 | -15.565471 | 0.232393  | -4.999728 |
| 449 | 1 | 0 | -19.177812 | -0.301308 | -5.073493 |
| 450 | 1 | 0 | -20.399726 | 0.956676  | -5.253163 |
| 451 | 7 | 0 | -20.146127 | -0.021938 | -5.215692 |
| 452 | 7 | 0 | -15.336850 | -0.742843 | -4.855631 |
| 453 | 7 | 0 | -10.575228 | -1.421028 | -4.704129 |
| 454 | 8 | 0 | -22.352651 | -0.629291 | -5.242115 |
| 455 | 8 | 0 | -17.550686 | -1.281728 | -4.833196 |
| 456 | 8 | 0 | -12.789209 | -1.927228 | -4.530704 |
| 457 | 6 | 0 | -22.100056 | -2.092159 | 3.313355  |
| 458 | 1 | 0 | -23.148629 | -1.714508 | 3.237573  |
| 459 | 1 | 0 | -22.133972 | -3.204942 | 3.399359  |
| 460 | 1 | 0 | -21.646192 | -1.681374 | 4.247849  |
| 461 | 6 | 0 | -17.314351 | -1.767631 | 3.761925  |
| 462 | 1 | 0 | -16.985124 | -1.137546 | 4.623870  |
| 463 | 1 | 0 | -18.415132 | -1.628822 | 3.626560  |
| 464 | 1 | 0 | -17.124577 | -2.837359 | 4.019193  |
| 465 | 6 | 0 | -12.519311 | -1.186160 | 4.004183  |
| 466 | 1 | 0 | -13.625376 | -1.217128 | 3.847553  |
| 467 | 1 | 0 | -12.206087 | -2.143633 | 4.485204  |
| 468 | 1 | 0 | -12.291936 | -0.345504 | 4.707214  |
| 469 | 6 | 0 | 6.897527   | 0.262100  | 4.254992  |
| 470 | 1 | 0 | 5.787411   | 0.159485  | 4.177587  |
| 471 | 1 | 0 | 7.256907   | -0.417046 | 5.064848  |



|     |   |   |           |           |           |
|-----|---|---|-----------|-----------|-----------|
| 472 | 1 | 0 | 7.129347  | 1.317141  | 4.548370  |
| 473 | 1 | 0 | -4.741027 | 2.863655  | 5.807170  |
| 474 | 7 | 0 | -5.714414 | 2.712573  | 6.077394  |
| 475 | 6 | 0 | -6.734623 | 2.781961  | 5.191067  |
| 476 | 1 | 0 | -5.944710 | 2.506845  | 7.040458  |
| 477 | 6 | 0 | -6.353257 | 3.123282  | 3.755050  |
| 478 | 8 | 0 | -7.915844 | 2.586909  | 5.516543  |
| 479 | 6 | 0 | -6.932592 | 4.489243  | 3.337903  |
| 480 | 1 | 0 | -6.774642 | 2.331365  | 3.123350  |
| 481 | 1 | 0 | -5.264983 | 3.113355  | 3.633382  |
| 482 | 6 | 0 | -6.632590 | 4.842637  | 1.867106  |
| 483 | 1 | 0 | -6.503385 | 5.279880  | 3.965338  |
| 484 | 1 | 0 | -8.015930 | 4.492746  | 3.497414  |
| 485 | 7 | 0 | -7.100306 | 6.192288  | 1.558887  |
| 486 | 6 | 0 | -7.334416 | 3.853905  | 0.916022  |
| 487 | 1 | 0 | -5.555714 | 4.824915  | 1.689098  |
| 488 | 6 | 0 | -6.259000 | 7.186146  | 1.201676  |
| 489 | 1 | 0 | -8.104503 | 6.387887  | 1.635613  |
| 490 | 8 | 0 | -8.570297 | 3.757243  | 0.914407  |
| 491 | 7 | 0 | -6.513719 | 3.126798  | 0.124382  |
| 492 | 6 | 0 | -6.922306 | 8.561520  | 0.947476  |
| 493 | 8 | 0 | -5.028052 | 7.053714  | 1.094205  |
| 494 | 1 | 0 | -5.502780 | 3.269640  | 0.192291  |
| 495 | 6 | 0 | -7.018248 | 2.127386  | -0.832522 |
| 496 | 7 | 0 | -6.314793 | 9.525347  | 1.876278  |
| 497 | 6 | 0 | -6.746598 | 8.917883  | -0.526602 |
| 498 | 1 | 0 | -7.991704 | 8.518282  | 1.182172  |
| 499 | 6 | 0 | -6.439970 | 0.757823  | -0.392245 |
| 500 | 6 | 0 | -6.612172 | 2.391756  | -2.280611 |
| 501 | 1 | 0 | -8.110850 | 2.124618  | -0.756096 |
| 502 | 1 | 0 | -5.307717 | 9.691239  | 1.817109  |
| 503 | 6 | 0 | -7.047366 | 10.222115 | 2.781827  |
| 504 | 6 | 0 | -7.427765 | 7.872280  | -1.388891 |
| 505 | 6 | 0 | -7.318273 | 10.286907 | -0.832735 |
| 506 | 1 | 0 | -5.643376 | 8.921078  | -0.767359 |
| 507 | 8 | 0 | -5.209704 | 0.595709  | -0.331433 |
| 508 | 7 | 0 | -7.352251 | -0.181349 | -0.065467 |
| 509 | 6 | 0 | -7.182185 | 3.713154  | -2.779394 |
| 510 | 6 | 0 | -7.092147 | 1.243832  | -3.148882 |
| 511 | 1 | 0 | -5.485399 | 2.436903  | -2.335379 |
| 512 | 6 | 0 | -6.250768 | 11.158367 | 3.678378  |
| 513 | 8 | 0 | -8.278775 | 10.115528 | 2.903634  |
| 514 | 1 | 0 | -7.349728 | 8.156811  | -2.465781 |

|     |   |   |           |           |           |
|-----|---|---|-----------|-----------|-----------|
| 515 | 1 | 0 | -6.946545 | 6.873142  | -1.253067 |
| 516 | 1 | 0 | -8.509328 | 7.786629  | -1.120639 |
| 517 | 1 | 0 | -7.276682 | 10.480300 | -1.932149 |
| 518 | 1 | 0 | -8.383763 | 10.348237 | -0.501742 |
| 519 | 1 | 0 | -6.737648 | 11.087346 | -0.315340 |
| 520 | 1 | 0 | -8.350434 | 0.048492  | -0.121835 |
| 521 | 6 | 0 | -6.968050 | -1.504030 | 0.458789  |
| 522 | 6 | 0 | -6.542478 | 4.161258  | -4.069192 |
| 523 | 1 | 0 | -8.291134 | 3.606090  | -2.922554 |
| 524 | 1 | 0 | -7.025847 | 4.514188  | -2.008600 |
| 525 | 1 | 0 | -6.854350 | 1.445033  | -4.220940 |
| 526 | 1 | 0 | -6.588582 | 0.291143  | -2.852228 |
| 527 | 1 | 0 | -8.196845 | 1.109080  | -3.047700 |
| 528 | 1 | 0 | -6.685055 | 12.160791 | 3.604540  |
| 529 | 1 | 0 | -6.367234 | 10.824981 | 4.715449  |
| 530 | 1 | 0 | -5.190077 | 11.189789 | 3.417444  |
| 531 | 6 | 0 | -7.560553 | -2.569252 | -0.498182 |
| 532 | 6 | 0 | -7.487273 | -1.786048 | 1.867908  |
| 533 | 1 | 0 | -5.874213 | -1.549936 | 0.457926  |
| 534 | 1 | 0 | -6.922846 | 5.172818  | -4.352357 |
| 535 | 1 | 0 | -5.431870 | 4.220196  | -3.959936 |
| 536 | 1 | 0 | -6.775689 | 3.456113  | -4.902954 |
| 537 | 8 | 0 | -8.786360 | -2.655108 | -0.653306 |
| 538 | 7 | 0 | -6.656725 | -3.342576 | -1.144749 |
| 539 | 6 | 0 | -7.051830 | -3.176454 | 2.290103  |
| 540 | 6 | 0 | -6.987623 | -0.746923 | 2.862171  |
| 541 | 1 | 0 | -8.616225 | -1.753248 | 1.845492  |
| 542 | 1 | 0 | -5.662491 | -3.232027 | -0.926133 |
| 543 | 6 | 0 | -7.054035 | -4.391049 | -2.079513 |
| 544 | 1 | 0 | -7.388744 | -3.380714 | 3.334754  |
| 545 | 1 | 0 | -7.501265 | -3.947745 | 1.618470  |
| 546 | 1 | 0 | -5.939142 | -3.270254 | 2.248316  |
| 547 | 1 | 0 | -5.881756 | -0.876672 | 3.008272  |
| 548 | 1 | 0 | -7.147703 | 0.282990  | 2.445673  |
| 549 | 6 | 0 | -6.573427 | -5.750240 | -1.541222 |
| 550 | 6 | 0 | -6.421423 | -4.179947 | -3.472716 |
| 551 | 1 | 0 | -8.142276 | -4.371550 | -2.153565 |
| 552 | 8 | 0 | -5.370348 | -5.927780 | -1.285533 |
| 553 | 7 | 0 | -7.522370 | -6.705439 | -1.403304 |
| 554 | 1 | 0 | -5.332948 | -4.247667 | -3.406581 |
| 555 | 1 | 0 | -6.778470 | -4.974094 | -4.140580 |
| 556 | 1 | 0 | -8.504229 | -6.470428 | -1.577197 |
| 557 | 6 | 0 | -7.158947 | -8.040707 | -0.914550 |

|     |   |   |            |            |           |
|-----|---|---|------------|------------|-----------|
| 558 | 6 | 0 | -7.668352  | -9.137979  | -1.876193 |
| 559 | 6 | 0 | -7.594104  | -8.352208  | 0.502459  |
| 560 | 1 | 0 | -6.063012  | -8.066214  | -0.915305 |
| 561 | 8 | 0 | -8.840142  | -9.185799  | -2.282298 |
| 562 | 6 | 0 | -9.071072  | -8.194989  | 0.788229  |
| 563 | 1 | 0 | -7.283028  | -9.409775  | 0.725989  |
| 564 | 1 | 0 | -7.014734  | -7.684246  | 1.199778  |
| 565 | 6 | 0 | -7.032108  | -11.176969 | -3.079811 |
| 566 | 6 | 0 | -9.361097  | -8.614722  | 2.215678  |
| 567 | 1 | 0 | -9.384812  | -7.128665  | 0.633175  |
| 568 | 1 | 0 | -9.668301  | -8.818355  | 0.069117  |
| 569 | 1 | 0 | -6.179312  | -11.861051 | -3.076896 |
| 570 | 1 | 0 | -7.919051  | -11.709328 | -2.719644 |
| 571 | 1 | 0 | -7.224338  | -10.853790 | -4.110892 |
| 572 | 6 | 0 | -10.836972 | -8.415549  | 2.552170  |
| 573 | 1 | 0 | -9.083283  | -9.692368  | 2.357379  |
| 574 | 1 | 0 | -8.721637  | -8.014409  | 2.917438  |
| 575 | 7 | 0 | -11.164487 | -8.778515  | 3.910359  |
| 576 | 1 | 0 | -11.109454 | -7.342742  | 2.313909  |
| 577 | 1 | 0 | -11.456082 | -9.070432  | 1.871279  |
| 578 | 1 | 0 | -10.615416 | -8.259300  | 4.565413  |
| 579 | 1 | 0 | -12.134894 | -8.614080  | 4.088920  |
| 580 | 6 | 0 | -6.843143  | -2.847305  | -4.086364 |
| 581 | 1 | 0 | -4.855927  | -2.278103  | -4.280153 |
| 582 | 1 | 0 | -6.072862  | -1.120596  | -4.828542 |
| 583 | 7 | 0 | -5.832199  | -2.026153  | -4.446274 |
| 584 | 8 | 0 | -8.037909  | -2.557493  | -4.245478 |
| 585 | 6 | 0 | -7.694010  | -0.833517  | 4.191765  |
| 586 | 1 | 0 | -8.800304  | -0.902201  | 4.049631  |
| 587 | 1 | 0 | -7.358386  | -1.727652  | 4.769809  |
| 588 | 1 | 0 | -7.478016  | 0.082056   | 4.798375  |
| 589 | 1 | 0 | -5.768245  | -9.907178  | -1.896383 |
| 590 | 7 | 0 | -6.728162  | -10.047183 | -2.213902 |
| 591 | 1 | 0 | 0.150036   | 3.358405   | 5.492731  |
| 592 | 7 | 0 | -0.820678  | 3.240149   | 5.788042  |
| 593 | 6 | 0 | -1.853047  | 3.239171   | 4.913467  |
| 594 | 1 | 0 | -1.039151  | 3.131527   | 6.769585  |
| 595 | 6 | 0 | -1.489688  | 3.435940   | 3.445872  |
| 596 | 8 | 0 | -3.031512  | 3.090905   | 5.272266  |
| 597 | 6 | 0 | -2.097162  | 4.740460   | 2.894877  |
| 598 | 1 | 0 | -1.900786  | 2.574506   | 2.904493  |
| 599 | 1 | 0 | -0.402516  | 3.430874   | 3.314974  |
| 600 | 6 | 0 | -1.816720  | 4.942675   | 1.391615  |

|     |   |   |           |           |           |
|-----|---|---|-----------|-----------|-----------|
| 601 | 1 | 0 | -1.675666 | 5.599075  | 3.431662  |
| 602 | 1 | 0 | -3.178687 | 4.743356  | 3.066148  |
| 603 | 7 | 0 | -2.295418 | 6.250703  | 0.950392  |
| 604 | 6 | 0 | -2.521937 | 3.856159  | 0.556685  |
| 605 | 1 | 0 | -0.741675 | 4.913503  | 1.204386  |
| 606 | 6 | 0 | -1.462104 | 7.203181  | 0.478557  |
| 607 | 1 | 0 | -3.299247 | 6.450640  | 1.018200  |
| 608 | 8 | 0 | -3.758003 | 3.760312  | 0.571508  |
| 609 | 7 | 0 | -1.704805 | 3.046668  | -0.153767 |
| 610 | 6 | 0 | -2.133601 | 8.543751  | 0.092327  |
| 611 | 8 | 0 | -0.232490 | 7.060808  | 0.367846  |
| 612 | 1 | 0 | -0.693749 | 3.198542  | -0.108748 |
| 613 | 6 | 0 | -2.212471 | 1.950878  | -0.997330 |
| 614 | 7 | 0 | -1.524231 | 9.599449  | 0.913948  |
| 615 | 6 | 0 | -1.970859 | 8.749746  | -1.411549 |
| 616 | 1 | 0 | -3.200895 | 8.520282  | 0.339181  |
| 617 | 6 | 0 | -1.631507 | 0.635136  | -0.417529 |
| 618 | 6 | 0 | -1.812503 | 2.060976  | -2.467042 |
| 619 | 1 | 0 | -3.304884 | 1.955452  | -0.918065 |
| 620 | 1 | 0 | -0.519612 | 9.767288  | 0.825466  |
| 621 | 6 | 0 | -2.253290 | 10.380330 | 1.751417  |
| 622 | 6 | 0 | -2.653895 | 7.619691  | -2.158067 |
| 623 | 6 | 0 | -2.551015 | 10.078594 | -1.850081 |
| 624 | 1 | 0 | -0.869513 | 8.732480  | -1.660225 |
| 625 | 8 | 0 | -0.400864 | 0.482617  | -0.341493 |
| 626 | 7 | 0 | -2.541065 | -0.267733 | 0.005271  |
| 627 | 6 | 0 | -2.387859 | 3.321027  | -3.100268 |
| 628 | 6 | 0 | -2.293582 | 0.826541  | -3.206381 |
| 629 | 1 | 0 | -0.686101 | 2.101990  | -2.531174 |
| 630 | 6 | 0 | -1.453890 | 11.404618 | 2.543017  |
| 631 | 8 | 0 | -3.482913 | 10.280646 | 1.894687  |
| 632 | 1 | 0 | -2.582417 | 7.792377  | -3.258889 |
| 633 | 1 | 0 | -2.169257 | 6.640801  | -1.923074 |
| 634 | 1 | 0 | -3.733748 | 7.559859  | -1.876418 |
| 635 | 1 | 0 | -2.519470 | 10.159431 | -2.963775 |
| 636 | 1 | 0 | -3.613943 | 10.169581 | -1.517702 |
| 637 | 1 | 0 | -1.969505 | 10.929449 | -1.421788 |
| 638 | 1 | 0 | -3.539801 | -0.046917 | -0.072890 |
| 639 | 6 | 0 | -2.153344 | -1.526768 | 0.665997  |
| 640 | 6 | 0 | -1.757944 | 3.630293  | -4.434809 |
| 641 | 1 | 0 | -3.497468 | 3.197700  | -3.223894 |
| 642 | 1 | 0 | -2.228205 | 4.199834  | -2.420245 |
| 643 | 1 | 0 | -2.058830 | 0.911870  | -4.294465 |

|     |   |   |           |            |           |
|-----|---|---|-----------|------------|-----------|
| 644 | 1 | 0 | -1.787925 | -0.088112  | -2.810372 |
| 645 | 1 | 0 | -3.397855 | 0.702491   | -3.088146 |
| 646 | 1 | 0 | -1.904554 | 12.390335  | 2.388377  |
| 647 | 1 | 0 | -1.544910 | 11.164611  | 3.608164  |
| 648 | 1 | 0 | -0.398748 | 11.425830  | 2.259389  |
| 649 | 6 | 0 | -2.754803 | -2.687608  | -0.165951 |
| 650 | 6 | 0 | -2.661128 | -1.653469  | 2.101529  |
| 651 | 1 | 0 | -1.059585 | -1.574408  | 0.661543  |
| 652 | 1 | 0 | -2.145752 | 4.603435   | -4.823099 |
| 653 | 1 | 0 | -0.647129 | 3.706492   | -4.339598 |
| 654 | 1 | 0 | -1.991854 | 2.838122   | -5.186153 |
| 655 | 8 | 0 | -3.981998 | -2.786919  | -0.301730 |
| 656 | 7 | 0 | -1.856730 | -3.528154  | -0.731644 |
| 657 | 6 | 0 | -2.236441 | -2.996686  | 2.664157  |
| 658 | 6 | 0 | -2.140154 | -0.521780  | 2.976798  |
| 659 | 1 | 0 | -3.789842 | -1.610421  | 2.085765  |
| 660 | 1 | 0 | -0.860271 | -3.394536  | -0.536908 |
| 661 | 6 | 0 | -2.260938 | -4.667322  | -1.550482 |
| 662 | 1 | 0 | -2.558243 | -3.082542  | 3.729815  |
| 663 | 1 | 0 | -2.707026 | -3.828982  | 2.086352  |
| 664 | 1 | 0 | -1.125938 | -3.110670  | 2.615781  |
| 665 | 1 | 0 | -1.038188 | -0.660220  | 3.143244  |
| 666 | 1 | 0 | -2.273291 | 0.459128   | 2.447802  |
| 667 | 6 | 0 | -1.767793 | -5.963662  | -0.884262 |
| 668 | 6 | 0 | -1.645134 | -4.594525  | -2.965886 |
| 669 | 1 | 0 | -3.350012 | -4.658311  | -1.613648 |
| 670 | 8 | 0 | -0.559854 | -6.111753  | -0.632670 |
| 671 | 7 | 0 | -2.710092 | -6.902420  | -0.633386 |
| 672 | 1 | 0 | -0.555428 | -4.647362  | -2.905925 |
| 673 | 1 | 0 | -2.003200 | -5.454748  | -3.545469 |
| 674 | 1 | 0 | -3.695926 | -6.689651  | -0.812869 |
| 675 | 6 | 0 | -2.329361 | -8.181576  | -0.023264 |
| 676 | 6 | 0 | -2.869053 | -9.371638  | -0.848562 |
| 677 | 6 | 0 | -2.714067 | -8.346642  | 1.432500  |
| 678 | 1 | 0 | -1.234099 | -8.209081  | -0.058348 |
| 679 | 8 | 0 | -4.050895 | -9.454901  | -1.218774 |
| 680 | 7 | 0 | -1.940962 | -10.319737 | -1.104601 |
| 681 | 6 | 0 | -4.182292 | -8.171555  | 1.750612  |
| 682 | 1 | 0 | -2.384497 | -9.373269  | 1.753217  |
| 683 | 1 | 0 | -2.118980 | -7.606283  | 2.037314  |
| 684 | 1 | 0 | -0.973314 | -10.149817 | -0.827944 |
| 685 | 6 | 0 | -2.268394 | -11.538475 | -1.829831 |
| 686 | 6 | 0 | -4.422012 | -8.454120  | 3.220500  |

|     |   |   |           |            |           |
|-----|---|---|-----------|------------|-----------|
| 687 | 1 | 0 | -4.510435 | -7.127036  | 1.504373  |
| 688 | 1 | 0 | -4.796316 | -8.865028  | 1.114586  |
| 689 | 1 | 0 | -1.447425 | -12.250891 | -1.711574 |
| 690 | 1 | 0 | -3.187221 | -11.981855 | -1.432351 |
| 691 | 1 | 0 | -2.418031 | -11.344779 | -2.899946 |
| 692 | 6 | 0 | -5.892691 | -8.257587  | 3.580051  |
| 693 | 1 | 0 | -4.112166 | -9.505765  | 3.459051  |
| 694 | 1 | 0 | -3.779862 | -7.772383  | 3.840589  |
| 695 | 7 | 0 | -6.175990 | -8.512728  | 4.972028  |
| 696 | 1 | 0 | -6.195704 | -7.214090  | 3.261474  |
| 697 | 1 | 0 | -6.514050 | -8.979195  | 2.972489  |
| 698 | 1 | 0 | -5.636247 | -7.916462  | 5.566198  |
| 699 | 1 | 0 | -7.148878 | -8.375040  | 5.159414  |
| 700 | 6 | 0 | -2.085288 | -3.334176  | -3.705411 |
| 701 | 1 | 0 | -0.106328 | -2.764551  | -3.969341 |
| 702 | 1 | 0 | -1.340348 | -1.681005  | -4.620776 |
| 703 | 7 | 0 | -1.086753 | -2.539821  | -4.149232 |
| 704 | 8 | 0 | -3.284490 | -3.076082  | -3.885214 |
| 705 | 6 | 0 | -2.853362 | -0.444372  | 4.303311  |
| 706 | 1 | 0 | -3.960730 | -0.495651  | 4.161895  |
| 707 | 1 | 0 | -2.546662 | -1.280922  | 4.975896  |
| 708 | 1 | 0 | -2.612578 | 0.524249   | 4.809912  |
| 709 | 1 | 0 | 5.044506  | 3.796342   | 5.075119  |
| 710 | 7 | 0 | 4.078546  | 3.709891   | 5.395658  |
| 711 | 6 | 0 | 3.031570  | 3.634416   | 4.541932  |
| 712 | 1 | 0 | 3.876457  | 3.693497   | 6.386574  |
| 713 | 6 | 0 | 3.371546  | 3.690710   | 3.056730  |
| 714 | 8 | 0 | 1.858610  | 3.527201   | 4.931870  |
| 715 | 6 | 0 | 2.746577  | 4.931884   | 2.390832  |
| 716 | 1 | 0 | 2.959065  | 2.778462   | 2.607114  |
| 717 | 1 | 0 | 4.456563  | 3.678700   | 2.909447  |
| 718 | 6 | 0 | 2.997542  | 4.983972   | 0.869796  |
| 719 | 1 | 0 | 3.173543  | 5.841488   | 2.830602  |
| 720 | 1 | 0 | 1.668775  | 4.947648   | 2.583464  |
| 721 | 7 | 0 | 2.506828  | 6.239956   | 0.307937  |
| 722 | 6 | 0 | 2.282878  | 3.818313   | 0.160224  |
| 723 | 1 | 0 | 4.069146  | 4.938155   | 0.667460  |
| 724 | 6 | 0 | 3.331105  | 7.144826   | -0.263329 |
| 725 | 1 | 0 | 1.502173  | 6.439906   | 0.359670  |
| 726 | 8 | 0 | 1.046727  | 3.729293   | 0.194672  |
| 727 | 7 | 0 | 3.092263  | 2.934506   | -0.465102 |
| 728 | 6 | 0 | 2.648297  | 8.433760   | -0.781599 |
| 729 | 8 | 0 | 4.560903  | 6.997836   | -0.367287 |

|     |   |   |          |           |           |
|-----|---|---|----------|-----------|-----------|
| 730 | 1 | 0 | 4.103486 | 3.090304  | -0.450030 |
| 731 | 6 | 0 | 2.575979 | 1.758252  | -1.185935 |
| 732 | 7 | 0 | 3.259613 | 9.574090  | -0.084440 |
| 733 | 6 | 0 | 2.793244 | 8.478031  | -2.300930 |
| 734 | 1 | 0 | 1.583841 | 8.431683  | -0.521914 |
| 735 | 6 | 0 | 3.170226 | 0.509195  | -0.484577 |
| 736 | 6 | 0 | 2.953604 | 1.719589  | -2.665250 |
| 737 | 1 | 0 | 1.484918 | 1.768188  | -1.090383 |
| 738 | 1 | 0 | 4.263571 | 9.732317  | -0.195032 |
| 739 | 6 | 0 | 2.530773 | 10.448388 | 0.655534  |
| 740 | 6 | 0 | 2.105977 | 7.272777  | -2.914004 |
| 741 | 6 | 0 | 2.203053 | 9.750826  | -2.872256 |
| 742 | 1 | 0 | 3.891714 | 8.437296  | -2.559282 |
| 743 | 8 | 0 | 4.402361 | 0.367502  | -0.411556 |
| 744 | 7 | 0 | 2.269715 | -0.347441 | 0.041002  |
| 745 | 6 | 0 | 2.374855 | 2.913864  | -3.412481 |
| 746 | 6 | 0 | 2.454893 | 0.420904  | -3.270752 |
| 747 | 1 | 0 | 4.079070 | 1.746977  | -2.749801 |
| 748 | 6 | 0 | 3.328974 | 11.561897 | 1.317166  |
| 749 | 8 | 0 | 1.301528 | 10.364876 | 0.811588  |
| 750 | 1 | 0 | 2.158208 | 7.329939  | -4.027891 |
| 751 | 1 | 0 | 2.601203 | 6.326284  | -2.586611 |
| 752 | 1 | 0 | 1.031321 | 7.237023  | -2.609140 |
| 753 | 1 | 0 | 2.220087 | 9.711552  | -3.988503 |
| 754 | 1 | 0 | 1.144192 | 9.875032  | -2.537615 |
| 755 | 1 | 0 | 2.787157 | 10.643954 | -2.545593 |
| 756 | 1 | 0 | 1.269519 | -0.136460 | -0.044527 |
| 757 | 6 | 0 | 2.668704 | -1.533215 | 0.820106  |
| 758 | 6 | 0 | 2.979153 | 3.080036  | -4.783834 |
| 759 | 1 | 0 | 1.262137 | 2.788722  | -3.501199 |
| 760 | 1 | 0 | 2.554623 | 3.855960  | -2.829089 |
| 761 | 1 | 0 | 2.680847 | 0.392321  | -4.363666 |
| 762 | 1 | 0 | 2.955300 | -0.453799 | -2.787538 |
| 763 | 1 | 0 | 1.350557 | 0.320722  | -3.131826 |
| 764 | 1 | 0 | 2.891432 | 12.521915 | 1.024224  |
| 765 | 1 | 0 | 3.217867 | 11.467981 | 2.402976  |
| 766 | 1 | 0 | 4.388365 | 11.537348 | 1.050275  |
| 767 | 6 | 0 | 2.058167 | -2.771939 | 0.116625  |
| 768 | 6 | 0 | 2.179537 | -1.514460 | 2.267398  |
| 769 | 1 | 0 | 3.762449 | -1.580431 | 0.806251  |
| 770 | 1 | 0 | 2.590137 | 4.012213  | -5.261262 |
| 771 | 1 | 0 | 4.092185 | 3.155479  | -4.719223 |
| 772 | 1 | 0 | 2.723985 | 2.217876  | -5.445899 |

|     |   |   |           |            |           |
|-----|---|---|-----------|------------|-----------|
| 773 | 8 | 0 | 0.829325  | -2.886911  | 0.011630  |
| 774 | 7 | 0 | 2.950553  | -3.661524  | -0.378690 |
| 775 | 6 | 0 | 2.608605  | -2.796231  | 2.955960  |
| 776 | 6 | 0 | 2.714484  | -0.302919  | 3.018617  |
| 777 | 1 | 0 | 1.050810  | -1.469437  | 2.261921  |
| 778 | 1 | 0 | 3.949234  | -3.508624  | -0.211392 |
| 779 | 6 | 0 | 2.538912  | -4.874654  | -1.079227 |
| 780 | 1 | 0 | 2.299954  | -2.774269  | 4.028724  |
| 781 | 1 | 0 | 2.129221  | -3.680522  | 2.469873  |
| 782 | 1 | 0 | 3.718155  | -2.918019  | 2.905729  |
| 783 | 1 | 0 | 3.817510  | -0.429769  | 3.187340  |
| 784 | 1 | 0 | 2.580320  | 0.620354   | 2.394672  |
| 785 | 6 | 0 | 3.048254  | -6.099207  | -0.299341 |
| 786 | 6 | 0 | 3.133756  | -4.933624  | -2.503966 |
| 787 | 1 | 0 | 1.448983  | -4.875315  | -1.125646 |
| 788 | 8 | 0 | 4.261455  | -6.220093  | -0.058743 |
| 789 | 7 | 0 | 2.113602  | -7.008493  | 0.062779  |
| 790 | 1 | 0 | 4.224305  | -4.981114  | -2.455348 |
| 791 | 1 | 0 | 2.768962  | -5.843914  | -2.996388 |
| 792 | 1 | 0 | 1.124008  | -6.815274  | -0.117838 |
| 793 | 6 | 0 | 2.509009  | -8.219493  | 0.791392  |
| 794 | 6 | 0 | 1.954196  | -9.487058  | 0.102325  |
| 795 | 6 | 0 | 2.156491  | -8.234986  | 2.264371  |
| 796 | 1 | 0 | 3.603235  | -8.251373  | 0.736016  |
| 797 | 8 | 0 | 0.765638  | -9.608075  | -0.234809 |
| 798 | 7 | 0 | 2.879118  | -10.455822 | -0.076277 |
| 799 | 6 | 0 | 0.694759  | -8.031576  | 2.594772  |
| 800 | 1 | 0 | 2.497535  | -9.222505  | 2.681456  |
| 801 | 1 | 0 | 2.761084  | -7.435124  | 2.776994  |
| 802 | 1 | 0 | 3.850613  | -10.260538 | 0.167717  |
| 803 | 6 | 0 | 2.539003  | -11.739596 | -0.672128 |
| 804 | 6 | 0 | 0.488286  | -8.159457  | 4.091033  |
| 805 | 1 | 0 | 0.356039  | -7.019470  | 2.248008  |
| 806 | 1 | 0 | 0.070905  | -8.789607  | 2.048231  |
| 807 | 1 | 0 | 3.393156  | -12.413664 | -0.566367 |
| 808 | 1 | 0 | 1.671919  | -12.180098 | -0.168130 |
| 809 | 1 | 0 | 2.297745  | -11.636774 | -1.737741 |
| 810 | 6 | 0 | -0.976836 | -7.939169  | 4.459167  |
| 811 | 1 | 0 | 0.814523  | -9.177273  | 4.432419  |
| 812 | 1 | 0 | 1.135176  | -7.410302  | 4.621992  |
| 813 | 7 | 0 | -1.229376 | -8.052150  | 5.875556  |
| 814 | 1 | 0 | -1.296952 | -6.936475  | 4.041559  |
| 815 | 1 | 0 | -1.602442 | -8.724544  | 3.941597  |



|     |   |   |           |           |           |
|-----|---|---|-----------|-----------|-----------|
| 816 | 1 | 0 | -0.689664 | -7.388572 | 6.393422  |
| 817 | 1 | 0 | -2.200992 | -7.912121 | 6.067638  |
| 818 | 6 | 0 | 2.682773  | -3.747597 | -3.352059 |
| 819 | 1 | 0 | 4.658046  | -3.221359 | -3.718680 |
| 820 | 1 | 0 | 3.413708  | -2.201144 | -4.446887 |
| 821 | 7 | 0 | 3.674632  | -3.010735 | -3.898465 |
| 822 | 8 | 0 | 1.481318  | -3.497578 | -3.527373 |
| 823 | 6 | 0 | 2.015247  | -0.088501 | 4.337479  |
| 824 | 1 | 0 | 0.906228  | -0.146479 | 4.212442  |
| 825 | 1 | 0 | 2.324098  | -0.855620 | 5.087407  |
| 826 | 1 | 0 | 2.266425  | 0.924330  | 4.742296  |
| 827 | 1 | 0 | 14.824698 | 4.614560  | 3.845689  |
| 828 | 7 | 0 | 13.876838 | 4.589829  | 4.222126  |
| 829 | 6 | 0 | 12.793640 | 4.331320  | 3.451991  |
| 830 | 1 | 0 | 13.719683 | 4.781094  | 5.202841  |
| 831 | 6 | 0 | 13.066443 | 4.081069  | 1.972854  |
| 832 | 8 | 0 | 11.641773 | 4.299458  | 3.910068  |
| 833 | 6 | 0 | 12.404119 | 5.161808  | 1.096895  |
| 834 | 1 | 0 | 12.639315 | 3.097762  | 1.739225  |
| 835 | 1 | 0 | 14.144089 | 4.036206  | 1.781946  |
| 836 | 6 | 0 | 12.598194 | 4.911491  | -0.412532 |
| 837 | 1 | 0 | 12.836014 | 6.142526  | 1.330569  |
| 838 | 1 | 0 | 11.333817 | 5.211446  | 1.322231  |
| 839 | 7 | 0 | 12.070039 | 6.029444  | -1.190750 |
| 840 | 6 | 0 | 11.875269 | 3.622857  | -0.849659 |
| 841 | 1 | 0 | 13.662062 | 4.834267  | -0.644606 |
| 842 | 6 | 0 | 12.858799 | 6.801783  | -1.968347 |
| 843 | 1 | 0 | 11.067996 | 6.240903  | -1.128353 |
| 844 | 8 | 0 | 10.644794 | 3.527852  | -0.736421 |
| 845 | 7 | 0 | 12.672790 | 2.645525  | -1.336823 |
| 846 | 6 | 0 | 12.145557 | 7.972112  | -2.687478 |
| 847 | 8 | 0 | 14.083160 | 6.630496  | -2.103178 |
| 848 | 1 | 0 | 13.679364 | 2.812627  | -1.402635 |
| 849 | 6 | 0 | 12.150867 | 1.345539  | -1.792955 |
| 850 | 7 | 0 | 12.774138 | 9.219815  | -2.231079 |
| 851 | 6 | 0 | 12.233824 | 7.739420  | -4.193644 |
| 852 | 1 | 0 | 11.091478 | 8.015771  | -2.391522 |
| 853 | 6 | 0 | 12.776418 | 0.264425  | -0.873455 |
| 854 | 6 | 0 | 12.492043 | 1.015020  | -3.244299 |
| 855 | 1 | 0 | 11.062486 | 1.368944  | -1.671503 |
| 856 | 1 | 0 | 13.770591 | 9.356303  | -2.411502 |
| 857 | 6 | 0 | 12.068942 | 10.214406 | -1.632971 |
| 858 | 6 | 0 | 11.533792 | 6.442020  | -4.550844 |

|     |   |   |           |           |           |
|-----|---|---|-----------|-----------|-----------|
| 859 | 6 | 0 | 11.613743 | 8.886562  | -4.964421 |
| 860 | 1 | 0 | 13.322313 | 7.652591  | -4.481412 |
| 861 | 8 | 0 | 14.011794 | 0.139448  | -0.815546 |
| 862 | 7 | 0 | 11.898729 | -0.467326 | -0.156241 |
| 863 | 6 | 0 | 11.872774 | 2.027822  | -4.198497 |
| 864 | 6 | 0 | 12.002836 | -0.385205 | -3.563689 |
| 865 | 1 | 0 | 13.614345 | 1.039510  | -3.364835 |
| 866 | 6 | 0 | 12.885723 | 11.427436 | -1.213239 |
| 867 | 8 | 0 | 10.847719 | 10.161920 | -1.417528 |
| 868 | 1 | 0 | 11.552537 | 6.291045  | -5.657008 |
| 869 | 1 | 0 | 12.042804 | 5.572480  | -4.067970 |
| 870 | 1 | 0 | 10.468796 | 6.465065  | -4.212734 |
| 871 | 1 | 0 | 11.589538 | 8.644409  | -6.054665 |
| 872 | 1 | 0 | 10.567174 | 9.069575  | -4.618260 |
| 873 | 1 | 0 | 12.203230 | 9.824393  | -4.828212 |
| 874 | 1 | 0 | 10.894659 | -0.275467 | -0.245956 |
| 875 | 6 | 0 | 12.328849 | -1.471676 | 0.832951  |
| 876 | 6 | 0 | 12.437580 | 1.921856  | -5.592468 |
| 877 | 1 | 0 | 10.760445 | 1.874189  | -4.227089 |
| 878 | 1 | 0 | 12.051715 | 3.069917  | -3.821447 |
| 879 | 1 | 0 | 12.198689 | -0.627333 | -4.635794 |
| 880 | 1 | 0 | 12.534134 | -1.139412 | -2.932786 |
| 881 | 1 | 0 | 10.905086 | -0.471473 | -3.373490 |
| 882 | 1 | 0 | 12.429609 | 12.320536 | -1.652557 |
| 883 | 1 | 0 | 12.820869 | 11.527337 | -0.124247 |
| 884 | 1 | 0 | 13.933415 | 11.356552 | -1.515759 |
| 885 | 6 | 0 | 11.706264 | -2.828088 | 0.413928  |
| 886 | 6 | 0 | 11.882988 | -1.162259 | 2.261132  |
| 887 | 1 | 0 | 13.421881 | -1.519767 | 0.794400  |
| 888 | 1 | 0 | 12.024120 | 2.737562  | -6.234255 |
| 889 | 1 | 0 | 13.550924 | 2.016234  | -5.576448 |
| 890 | 1 | 0 | 12.175367 | 0.943462  | -6.062329 |
| 891 | 8 | 0 | 10.476522 | -2.966577 | 0.378446  |
| 892 | 7 | 0 | 12.591091 | -3.795526 | 0.074437  |
| 893 | 6 | 0 | 12.342502 | -2.277799 | 3.180629  |
| 894 | 6 | 0 | 12.429659 | 0.177100  | 2.735887  |
| 895 | 1 | 0 | 10.754171 | -1.121415 | 2.281338  |
| 896 | 1 | 0 | 13.592046 | -3.608980 | 0.175976  |
| 897 | 6 | 0 | 12.171708 | -5.130126 | -0.342901 |
| 898 | 1 | 0 | 12.063195 | -2.041472 | 4.235504  |
| 899 | 1 | 0 | 11.857935 | -3.243467 | 2.896433  |
| 900 | 1 | 0 | 13.451260 | -2.403474 | 3.124203  |
| 901 | 1 | 0 | 13.539053 | 0.091134  | 2.887632  |

|     |   |   |           |            |           |
|-----|---|---|-----------|------------|-----------|
| 902 | 1 | 0 | 12.263877 | 0.955917   | 1.944908  |
| 903 | 6 | 0 | 12.705940 | -6.160804  | 0.667375  |
| 904 | 6 | 0 | 12.735714 | -5.489276  | -1.735609 |
| 905 | 1 | 0 | 11.081068 | -5.141873  | -0.364294 |
| 906 | 8 | 0 | 13.926333 | -6.224405  | 0.898458  |
| 907 | 7 | 0 | 11.786160 | -6.972803  | 1.236076  |
| 908 | 1 | 0 | 13.827476 | -5.527485  | -1.701724 |
| 909 | 1 | 0 | 12.364205 | -6.482757  | -2.016589 |
| 910 | 1 | 0 | 10.790845 | -6.824078  | 1.042190  |
| 911 | 6 | 0 | 12.203831 | -7.999150  | 2.198570  |
| 912 | 6 | 0 | 11.621424 | -9.381679  | 1.824000  |
| 913 | 6 | 0 | 11.901216 | -7.688307  | 3.650084  |
| 914 | 1 | 0 | 13.295135 | -8.054033  | 2.116686  |
| 915 | 8 | 0 | 10.425566 | -9.557506  | 1.542998  |
| 916 | 7 | 0 | 12.532108 | -10.379651 | 1.859005  |
| 917 | 6 | 0 | 10.450200 | -7.412081  | 3.974464  |
| 918 | 1 | 0 | 12.258990 | -8.561419  | 4.262623  |
| 919 | 1 | 0 | 12.519554 | -6.797934  | 3.955072  |
| 920 | 1 | 0 | 13.510531 | -10.142896 | 2.023784  |
| 921 | 6 | 0 | 12.170107 | -11.762605 | 1.584209  |
| 922 | 6 | 0 | 10.291999 | -7.202349  | 5.467235  |
| 923 | 1 | 0 | 10.095515 | -6.502097  | 3.421792  |
| 924 | 1 | 0 | 9.812816  | -8.271486  | 3.631171  |
| 925 | 1 | 0 | 12.976495 | -12.415368 | 1.929654  |
| 926 | 1 | 0 | 11.248096 | -12.023926 | 2.113060  |
| 927 | 1 | 0 | 12.009897 | -11.934597 | 0.511869  |
| 928 | 6 | 0 | 8.834642  | -6.920867  | 5.824782  |
| 929 | 1 | 0 | 10.646079 | -8.113909  | 6.017433  |
| 930 | 1 | 0 | 10.941246 | -6.346373  | 5.794573  |
| 931 | 7 | 0 | 8.627894  | -6.713217  | 7.237708  |
| 932 | 1 | 0 | 8.483642  | -6.042360  | 5.202449  |
| 933 | 1 | 0 | 8.209003  | -7.810188  | 5.518386  |
| 934 | 1 | 0 | 9.154529  | -5.930761  | 7.569499  |
| 935 | 1 | 0 | 7.657318  | -6.566238  | 7.429650  |
| 936 | 6 | 0 | 12.262124 | -4.507424  | -2.803853 |
| 937 | 1 | 0 | 14.227460 | -4.063335  | -3.311508 |
| 938 | 1 | 0 | 12.965447 | -3.221911  | -4.211473 |
| 939 | 7 | 0 | 13.240391 | -3.897032  | -3.509466 |
| 940 | 8 | 0 | 11.056890 | -4.301140  | -3.003674 |
| 941 | 6 | 0 | 11.772923 | 0.648346   | 4.009065  |
| 942 | 1 | 0 | 10.661152 | 0.559654   | 3.938087  |
| 943 | 1 | 0 | 12.117070 | 0.049710   | 4.886247  |
| 944 | 1 | 0 | 12.024395 | 1.723442   | 4.193023  |

|     |   |   |           |           |           |
|-----|---|---|-----------|-----------|-----------|
| 945 | 1 | 0 | 19.698898 | 4.925230  | 3.021368  |
| 946 | 7 | 0 | 18.755631 | 4.931073  | 3.404005  |
| 947 | 6 | 0 | 17.665256 | 4.602453  | 2.669151  |
| 948 | 1 | 0 | 18.608780 | 5.200884  | 4.367792  |
| 949 | 6 | 0 | 17.923915 | 4.223979  | 1.214508  |
| 950 | 8 | 0 | 16.519521 | 4.606525  | 3.140578  |
| 951 | 6 | 0 | 17.216895 | 5.198072  | 0.252488  |
| 952 | 1 | 0 | 17.525115 | 3.210273  | 1.080482  |
| 953 | 1 | 0 | 18.999347 | 4.189708  | 1.008261  |
| 954 | 6 | 0 | 17.380417 | 4.801951  | -1.229703 |
| 955 | 1 | 0 | 17.630280 | 6.206389  | 0.376717  |
| 956 | 1 | 0 | 16.151747 | 5.247593  | 0.500406  |
| 957 | 7 | 0 | 16.818863 | 5.831716  | -2.100380 |
| 958 | 6 | 0 | 16.664677 | 3.467142  | -1.514332 |
| 959 | 1 | 0 | 18.439924 | 4.714158  | -1.476964 |
| 960 | 6 | 0 | 17.573823 | 6.519920  | -2.983278 |
| 961 | 1 | 0 | 15.815438 | 6.037871  | -2.032998 |
| 962 | 8 | 0 | 15.435161 | 3.382147  | -1.394862 |
| 963 | 7 | 0 | 17.466662 | 2.437885  | -1.874251 |
| 964 | 6 | 0 | 16.825627 | 7.601171  | -3.801585 |
| 965 | 8 | 0 | 18.794399 | 6.335909  | -3.144672 |
| 966 | 1 | 0 | 18.471466 | 2.598724  | -1.958955 |
| 967 | 6 | 0 | 16.943527 | 1.094762  | -2.183707 |
| 968 | 7 | 0 | 17.460226 | 8.900289  | -3.532960 |
| 969 | 6 | 0 | 16.843001 | 7.187327  | -5.270839 |
| 970 | 1 | 0 | 15.786523 | 7.679005  | -3.462757 |
| 971 | 6 | 0 | 17.582653 | 0.114793  | -1.165226 |
| 972 | 6 | 0 | 17.265627 | 0.611726  | -3.595806 |
| 973 | 1 | 0 | 15.856840 | 1.131446  | -2.050613 |
| 974 | 1 | 0 | 18.429213 | 9.044581  | -3.818550 |
| 975 | 6 | 0 | 16.769957 | 9.949275  | -3.009948 |
| 976 | 6 | 0 | 16.124267 | 5.861506  | -5.434498 |
| 977 | 6 | 0 | 16.191497 | 8.237239  | -6.147037 |
| 978 | 1 | 0 | 17.916763 | 7.057114  | -5.595105 |
| 979 | 8 | 0 | 18.819084 | -0.007022 | -1.112861 |
| 980 | 7 | 0 | 16.714036 | -0.536195 | -0.363212 |
| 981 | 6 | 0 | 16.649582 | 1.524700  | -4.647842 |
| 982 | 6 | 0 | 16.757596 | -0.808280 | -3.763221 |
| 983 | 1 | 0 | 18.386872 | 0.610359  | -3.726759 |
| 984 | 6 | 0 | 17.574541 | 11.223039 | -2.802270 |
| 985 | 8 | 0 | 15.570719 | 9.894800  | -2.698841 |
| 986 | 1 | 0 | 16.073101 | 5.586482  | -6.515465 |
| 987 | 1 | 0 | 16.665482 | 5.049564  | -4.890217 |

|      |   |   |           |           |           |
|------|---|---|-----------|-----------|-----------|
| 988  | 1 | 0 | 15.082896 | 5.927463  | -5.033769 |
| 989  | 1 | 0 | 16.111319 | 7.861733  | -7.196104 |
| 990  | 1 | 0 | 15.164607 | 8.474397  | -5.775845 |
| 991  | 1 | 0 | 16.792777 | 9.177471  | -6.158733 |
| 992  | 1 | 0 | 15.708616 | -0.352250 | -0.458576 |
| 993  | 6 | 0 | 17.157929 | -1.426513 | 0.723813  |
| 994  | 6 | 0 | 17.216608 | 1.274664  | -6.022566 |
| 995  | 1 | 0 | 15.536806 | 1.372233  | -4.662063 |
| 996  | 1 | 0 | 16.830610 | 2.599434  | -4.379357 |
| 997  | 1 | 0 | 16.935061 | -1.160248 | -4.807758 |
| 998  | 1 | 0 | 17.289473 | -1.501258 | -3.066140 |
| 999  | 1 | 0 | 15.661806 | -0.861756 | -3.550599 |
| 1000 | 1 | 0 | 17.047475 | 12.047188 | -3.293474 |
| 1001 | 1 | 0 | 17.600034 | 11.443610 | -1.729415 |
| 1002 | 1 | 0 | 18.593724 | 11.149642 | -3.188722 |
| 1003 | 6 | 0 | 16.531567 | -2.822185 | 0.467799  |
| 1004 | 6 | 0 | 16.733066 | -0.963495 | 2.116693  |
| 1005 | 1 | 0 | 18.250240 | -1.477456 | 0.673390  |
| 1006 | 1 | 0 | 16.812746 | 2.025860  | -6.744169 |
| 1007 | 1 | 0 | 18.330960 | 1.359148  | -6.012325 |
| 1008 | 1 | 0 | 16.945862 | 0.256617  | -6.392842 |
| 1009 | 8 | 0 | 15.302812 | -2.965033 | 0.470637  |
| 1010 | 7 | 0 | 17.412569 | -3.822995 | 0.224952  |
| 1011 | 6 | 0 | 17.258096 | -1.943014 | 3.149090  |
| 1012 | 6 | 0 | 17.233027 | 0.443355  | 2.414237  |
| 1013 | 1 | 0 | 15.604127 | -0.962278 | 2.162247  |
| 1014 | 1 | 0 | 18.413010 | -3.621621 | 0.271218  |
| 1015 | 6 | 0 | 16.991299 | -5.195556 | -0.041002 |
| 1016 | 1 | 0 | 16.956713 | -1.615265 | 4.173070  |
| 1017 | 1 | 0 | 16.839816 | -2.963215 | 2.970013  |
| 1018 | 1 | 0 | 18.373168 | -2.000671 | 3.106867  |
| 1019 | 1 | 0 | 18.353684 | 0.430977  | 2.484734  |
| 1020 | 1 | 0 | 16.960748 | 1.127768  | 1.567224  |
| 1021 | 6 | 0 | 17.541210 | -6.116241 | 1.064345  |
| 1022 | 6 | 0 | 17.541676 | -5.701067 | -1.392648 |
| 1023 | 1 | 0 | 15.900422 | -5.210706 | -0.045710 |
| 1024 | 8 | 0 | 18.767513 | -6.170513 | 1.270474  |
| 1025 | 7 | 0 | 16.627951 | -6.849951 | 1.738680  |
| 1026 | 1 | 0 | 18.632527 | -5.757258 | -1.354334 |
| 1027 | 1 | 0 | 17.153167 | -6.711409 | -1.572159 |
| 1028 | 1 | 0 | 15.629619 | -6.718374 | 1.545250  |
| 1029 | 6 | 0 | 17.057587 | -7.784993 | 2.786063  |
| 1030 | 6 | 0 | 16.456770 | -9.190301 | 2.546497  |

|      |   |   |           |            |           |
|------|---|---|-----------|------------|-----------|
| 1031 | 6 | 0 | 16.784058 | -7.339740  | 4.207859  |
| 1032 | 1 | 0 | 18.146104 | -7.856394  | 2.687427  |
| 1033 | 8 | 0 | 15.250973 | -9.380029  | 2.326348  |
| 1034 | 7 | 0 | 17.361893 | -10.191360 | 2.616707  |
| 1035 | 6 | 0 | 15.342510 | -7.009345  | 4.523693  |
| 1036 | 1 | 0 | 17.134984 | -8.161726  | 4.891022  |
| 1037 | 1 | 0 | 17.422607 | -6.438227  | 4.425988  |
| 1038 | 1 | 0 | 18.344698 | -9.954936  | 2.742456  |
| 1039 | 6 | 0 | 16.975709 | -11.586080 | 2.452095  |
| 1040 | 6 | 0 | 15.204266 | -6.673511  | 5.995047  |
| 1041 | 1 | 0 | 14.998288 | -6.141496  | 3.901143  |
| 1042 | 1 | 0 | 14.685583 | -7.881999  | 4.259223  |
| 1043 | 1 | 0 | 17.852659 | -12.216292 | 2.621183  |
| 1044 | 1 | 0 | 16.196005 | -11.861268 | 3.171057  |
| 1045 | 1 | 0 | 16.591839 | -11.776146 | 1.442481  |
| 1046 | 6 | 0 | 13.754991 | -6.338052  | 6.339712  |
| 1047 | 1 | 0 | 15.548068 | -7.542284  | 6.616348  |
| 1048 | 1 | 0 | 15.871624 | -5.805365  | 6.244414  |
| 1049 | 1 | 0 | 13.410750 | -5.512163  | 5.645693  |
| 1050 | 1 | 0 | 13.112654 | -7.240460  | 6.117598  |
| 1051 | 6 | 0 | 17.085600 | -4.825428  | -2.556372 |
| 1052 | 1 | 0 | 19.057574 | -4.512119  | -3.130837 |
| 1053 | 1 | 0 | 17.817689 | -3.737966  | -4.112183 |
| 1054 | 7 | 0 | 18.076550 | -4.336348  | -3.338270 |
| 1055 | 8 | 0 | 15.887842 | -4.596518  | -2.767180 |
| 1056 | 6 | 0 | 16.645876 | 1.008122   | 3.683435  |
| 1057 | 1 | 0 | 15.540547 | 0.846607   | 3.714702  |
| 1058 | 1 | 0 | 17.096479 | 0.528409   | 4.585175  |
| 1059 | 1 | 0 | 16.838551 | 2.109606   | 3.735101  |
| 1060 | 7 | 0 | 13.567223 | -6.004602  | 7.730789  |
| 1061 | 1 | 0 | 14.098509 | -5.196659  | 7.984703  |
| 1062 | 1 | 0 | 12.599413 | -5.840810  | 7.922797  |
| 1063 | 1 | 0 | 24.600862 | 5.314650   | 2.116281  |
| 1064 | 7 | 0 | 23.681222 | 5.310054   | 2.531728  |
| 1065 | 6 | 0 | 22.584015 | 4.869349   | 1.853022  |
| 1066 | 1 | 0 | 23.559488 | 5.687907   | 3.462360  |
| 1067 | 6 | 0 | 22.826501 | 4.347468   | 0.441240  |
| 1068 | 8 | 0 | 21.457137 | 4.892118   | 2.354047  |
| 1069 | 6 | 0 | 22.081976 | 5.206881   | -0.599113 |
| 1070 | 1 | 0 | 22.447765 | 3.317844   | 0.425566  |
| 1071 | 1 | 0 | 23.898518 | 4.308568   | 0.211374  |
| 1072 | 6 | 0 | 22.184106 | 4.653196   | -2.037307 |
| 1073 | 1 | 0 | 22.494029 | 6.222686   | -0.606077 |

|      |   |   |           |           |           |
|------|---|---|-----------|-----------|-----------|
| 1074 | 1 | 0 | 21.026210 | 5.280064  | -0.319677 |
| 1075 | 7 | 0 | 21.557098 | 5.558206  | -2.989778 |
| 1076 | 6 | 0 | 21.478145 | 3.291345  | -2.142145 |
| 1077 | 1 | 0 | 23.237377 | 4.574053  | -2.326118 |
| 1078 | 6 | 0 | 22.294941 | 6.324894  | -3.835472 |
| 1079 | 1 | 0 | 20.537490 | 5.666393  | -2.975731 |
| 1080 | 8 | 0 | 20.253064 | 3.214986  | -1.991435 |
| 1081 | 7 | 0 | 22.270555 | 2.221810  | -2.394786 |
| 1082 | 6 | 0 | 21.465151 | 7.217035  | -4.790926 |
| 1083 | 8 | 0 | 23.530648 | 6.340334  | -3.860316 |
| 1084 | 1 | 0 | 23.272808 | 2.346770  | -2.469984 |
| 1085 | 6 | 0 | 21.759157 | 0.841848  | -2.489825 |
| 1086 | 7 | 0 | 22.106389 | 8.538108  | -4.797256 |
| 1087 | 6 | 0 | 21.391007 | 6.543754  | -6.159589 |
| 1088 | 1 | 0 | 20.447478 | 7.349210  | -4.408736 |
| 1089 | 6 | 0 | 22.417888 | 0.038538  | -1.334653 |
| 1090 | 6 | 0 | 22.077700 | 0.167005  | -3.821139 |
| 1091 | 1 | 0 | 20.672960 | 0.892289  | -2.358016 |
| 1092 | 1 | 0 | 23.115433 | 8.543909  | -4.883765 |
| 1093 | 6 | 0 | 21.442767 | 9.688686  | -4.508560 |
| 1094 | 1 | 0 | 22.438180 | 6.328867  | -6.517579 |
| 1095 | 8 | 0 | 23.643725 | 0.048611  | -1.180451 |
| 1096 | 7 | 0 | 21.539253 | -0.631511 | -0.542158 |
| 1097 | 6 | 0 | 21.355965 | 0.858436  | -4.971716 |
| 1098 | 6 | 0 | 21.680127 | -1.295249 | -3.749412 |
| 1099 | 1 | 0 | 23.189408 | 0.225823  | -4.002450 |
| 1100 | 6 | 0 | 22.294823 | 10.948380 | -4.464552 |
| 1101 | 8 | 0 | 20.224022 | 9.734214  | -4.292068 |
| 1102 | 1 | 0 | 20.531502 | -0.503918 | -0.682843 |
| 1103 | 6 | 0 | 21.983316 | -1.396794 | 0.632302  |
| 1104 | 6 | 0 | 21.965890 | 0.522548  | -6.309073 |
| 1105 | 1 | 0 | 20.273683 | 0.557915  | -4.961726 |
| 1106 | 1 | 0 | 21.386507 | 1.972089  | -4.835169 |
| 1107 | 1 | 0 | 21.787009 | -1.773106 | -4.752900 |
| 1108 | 1 | 0 | 22.335851 | -1.841829 | -3.028594 |
| 1109 | 1 | 0 | 20.618678 | -1.399571 | -3.415523 |
| 1110 | 1 | 0 | 21.897797 | 11.663239 | -5.192072 |
| 1111 | 1 | 0 | 22.199876 | 11.400274 | -3.472027 |
| 1112 | 1 | 0 | 23.352576 | 10.767476 | -4.678633 |
| 1113 | 6 | 0 | 21.362436 | -2.807491 | 0.497883  |
| 1114 | 6 | 0 | 21.553343 | -0.801973 | 1.971760  |
| 1115 | 1 | 0 | 23.078565 | -1.428540 | 0.588697  |
| 1116 | 1 | 0 | 21.422558 | 1.062646  | -7.122262 |

|      |   |   |           |            |           |
|------|---|---|-----------|------------|-----------|
| 1117 | 1 | 0 | 23.040310 | 0.826303   | -6.341906 |
| 1118 | 1 | 0 | 21.905381 | -0.572860  | -6.517058 |
| 1119 | 8 | 0 | 20.140449 | -2.946322  | 0.406219  |
| 1120 | 7 | 0 | 22.237009 | -3.848905  | 0.432404  |
| 1121 | 6 | 0 | 21.924250 | -1.749814  | 3.095907  |
| 1122 | 6 | 0 | 22.192524 | 0.562802   | 2.195181  |
| 1123 | 1 | 0 | 20.429783 | -0.682218  | 1.963629  |
| 1124 | 1 | 0 | 23.212421 | -3.693902  | 0.663798  |
| 1125 | 6 | 0 | 21.804724 | -5.241607  | 0.331099  |
| 1126 | 1 | 0 | 21.701761 | -1.274575  | 4.081918  |
| 1127 | 1 | 0 | 21.334313 | -2.695806  | 3.021897  |
| 1128 | 1 | 0 | 23.011927 | -2.001062  | 3.063204  |
| 1129 | 1 | 0 | 23.262274 | 0.424176   | 2.504654  |
| 1130 | 1 | 0 | 22.203404 | 1.142249   | 1.233786  |
| 1131 | 6 | 0 | 22.356878 | -6.010181  | 1.545193  |
| 1132 | 6 | 0 | 22.375112 | -5.904142  | -0.945807 |
| 1133 | 1 | 0 | 20.714048 | -5.251503  | 0.308803  |
| 1134 | 8 | 0 | 23.557454 | -5.917237  | 1.826045  |
| 1135 | 7 | 0 | 21.468398 | -6.792127  | 2.213058  |
| 1136 | 1 | 0 | 23.465756 | -5.967484  | -0.864662 |
| 1137 | 1 | 0 | 21.982207 | -6.924977  | -1.019201 |
| 1138 | 1 | 0 | 20.468339 | -6.719999  | 2.002350  |
| 1139 | 6 | 0 | 21.918971 | -7.572570  | 3.367638  |
| 1140 | 6 | 0 | 21.260588 | -8.971629  | 3.367973  |
| 1141 | 6 | 0 | 21.709558 | -6.916849  | 4.720587  |
| 1142 | 1 | 0 | 23.004150 | -7.682609  | 3.237514  |
| 1143 | 8 | 0 | 20.099727 | -9.168349  | 2.990807  |
| 1144 | 7 | 0 | 22.048665 | -9.964540  | 3.850783  |
| 1145 | 6 | 0 | 20.269114 | -6.580424  | 5.039649  |
| 1146 | 1 | 0 | 22.113402 | -7.611444  | 5.506292  |
| 1147 | 1 | 0 | 22.325002 | -5.977269  | 4.762994  |
| 1148 | 1 | 0 | 23.003344 | -9.746447  | 4.101286  |
| 1149 | 6 | 0 | 21.574125 | -11.335963 | 4.007745  |
| 1150 | 6 | 0 | 20.146876 | -6.105827  | 6.472705  |
| 1151 | 1 | 0 | 19.897303 | -5.783640  | 4.342206  |
| 1152 | 1 | 0 | 19.621087 | -7.484041  | 4.875892  |
| 1153 | 1 | 0 | 22.313717 | -11.902977 | 4.578331  |
| 1154 | 1 | 0 | 20.622279 | -11.348034 | 4.548041  |
| 1155 | 1 | 0 | 21.428449 | -11.818889 | 3.034435  |
| 1156 | 6 | 0 | 18.691585 | -5.784820  | 6.808659  |
| 1157 | 1 | 0 | 20.528671 | -6.898566  | 7.168621  |
| 1158 | 1 | 0 | 20.784492 | -5.195262  | 6.622114  |
| 1159 | 1 | 0 | 18.327664 | -5.001599  | 6.076202  |



|      |   |   |           |           |           |
|------|---|---|-----------|-----------|-----------|
| 1160 | 1 | 0 | 18.064873 | -6.708446 | 6.634051  |
| 1161 | 6 | 0 | 21.945544 | -5.157858 | -2.205093 |
| 1162 | 1 | 0 | 23.918442 | -4.713002 | -2.693059 |
| 1163 | 1 | 0 | 22.710525 | -4.107544 | -3.790251 |
| 1164 | 7 | 0 | 22.951779 | -4.664049 | -2.979259 |
| 1165 | 8 | 0 | 20.758787 | -5.018836 | -2.507459 |
| 1166 | 6 | 0 | 21.458421 | 1.369292  | 3.236609  |
| 1167 | 1 | 0 | 20.363090 | 1.399537  | 3.016144  |
| 1168 | 1 | 0 | 21.598779 | 0.932900  | 4.254659  |
| 1169 | 1 | 0 | 21.838437 | 2.421366  | 3.245990  |
| 1170 | 7 | 0 | 18.503440 | -5.389674 | 8.182949  |
| 1171 | 1 | 0 | 19.055394 | -4.587415 | 8.409514  |
| 1172 | 1 | 0 | 17.539086 | -5.193920 | 8.361516  |
| 1173 | 6 | 0 | 20.708371 | 7.438973  | -7.174163 |
| 1174 | 1 | 0 | 19.711060 | 7.770860  | -6.795321 |
| 1175 | 1 | 0 | 21.325598 | 8.343467  | -7.389518 |
| 1176 | 1 | 0 | 20.558785 | 6.884845  | -8.132587 |
| 1177 | 6 | 0 | 20.637637 | 5.231893  | -6.039601 |
| 1178 | 1 | 0 | 21.256987 | 4.466149  | -5.513356 |
| 1179 | 1 | 0 | 19.686120 | 5.375005  | -5.468317 |
| 1180 | 1 | 0 | 20.389329 | 4.839257  | -7.055112 |
